# Supplementary material for: Decoding a cancer-relevant splicing decision in the RON proto-oncogene using high-throughput mutagenesis
Source: Nat Commun. 2018 Aug 17;9:3315. doi: 10.1038/s41467-018-05748-7 (PMC6098099; doi:10.1038/s41467-018-05748-7)
Supplement: Supplementary file 4 — Supplementary Data 1 [file 41467_2018_5748_MOESM4_ESM.xlsx]

## Sheet: Supplementary Data 1
Supplementary Data 1. Quantification of splicing isoform frequencies for all 5,791 minigene variants in the library.

## Sheet: HEK293T rep1
ID	barcode	mutations	AE inclusion (%)	AE skipping (%)	first IR (%)	second IR (%)	full IR (%)	other (%)
1	AAAAAAAGCCTTTGG	T216A,G250C,T351A,T562C,T622A	72.77	2.13	4.89	2.55	15.32	2.34
2	AAAAAACCTATTTAA	G457T	55.12	7.94	6.33	2.2	26.26	2.14
3	AAAAAACTCTCAATT	A78G,C110T,T126C,A263T,T321A,CT418C,C437A,A513T,T536C,A572T,G579T	58.16	12.01	4.5	1.47	23.68	0.18
4	AAAAAATAGTCATGG	T130C,C168T,G260A,T354C,T429A,C493T,G606A	33.98	20.12	1.91	2.8	39.36	1.82
5	AAAAAGCACGTATCG	WT	61.47	11.91	4.21	1.55	18.49	2.37
6	AAAAAGGCCAGGATA	T39C,T170C,A535G	52.88	13.99	4.12	2.65	24.16	2.21
7	AAAAAGTGACCTAAA	WT	56.71	10.39	4.26	2.74	24.09	1.8
8	AAAAAGTGTAAACCT	A188T,G690A	47.28	3.37	0.8	5.77	41.83	0.96
9	AAAAATAACTCCGTT	G326A,T459A,G488C	39.1	27.96	3.64	2.05	25.04	2.21
10	AAAAATCACTGTTGT	C155T,A337G,C514T,T581TA	78.31	4.09	2.94	0.92	13.05	0.69
11	AAAAATCGCTCCAGG	T207C,A285T,A560G,C624T	23.3	0.94	0.81	8.98	27.21	38.76
12	AAAAATGATACTTAC	G190A,T200A,A238G,C527T,T539A,T545A,T621A	53.18	11.06	5.81	3.43	25.45	1.06
13	AAAAATTATTTACTA	A209G	53.75	8.38	5.24	1.4	29.32	1.91
14	AAAACACAAGGCCCG	T38G,A447G,C527T	3.2	81.04	0.13	0.2	13.46	1.98
15	AAAACACTAGGATCC	C28A,A160G,A166T,T195C,G352T,G445A,A597G	0.4	91.32	0	0.06	7.51	0.71
16	AAAACTTTTGTTATA	WT	54.97	12.03	5.18	2.84	23.03	1.95
17	AAAAGAACTTTATAA	A226AG,T432C	67.06	6.22	5.6	1.76	18.09	1.27
18	AAAAGAATTGACCAG	G322C	51.16	16.47	3.64	1.45	24.18	3.11
19	AAAAGACTTTAGCAC	G189A,C364T	32.54	37.7	3.44	0.79	22.62	2.91
20	AAAAGGCCGACAGTT	A120G,A268T,G352T,G480T,C589A	55.3	6.62	3.31	1.99	26.16	6.62
21	AAAAGGGGCTTTTAC	T115A,C142A,G276A,C512T,G525A,T660C	72.51	1.9	2.01	6.45	14.05	3.07
22	AAAAGTGTTGGACCA	T38C,T50A,T136C,G297T,T386A,G449A,G481A,T616C	0.44	63.09	0.1	0.15	10.56	25.66
23	AAAAGTTCTGATTCT	C520T,T545C	61.02	11.08	4.33	1.78	19.27	2.52
24	AAAATAAAGATTCAT	C119T,G686A,T704C	54	13.92	5.46	1.94	22.19	2.49
25	AAAATACCTAGTCTT	T386C,T413A,T446C	0.39	85.02	0	0.19	13.39	1.01
26	AAAATAGGATCGTAG	T201G	60.37	17.03	3.34	1.86	14.54	2.87
27	AAAATATAAGTTCAA	C77T,A236G,T329A,A513G	68.86	4.36	4.12	3.97	16.49	2.21
28	AAAATATTTTGGTAG	T137A,G444T,A456T,C467A,TG498T,C668G,A682T	0.21	57.83	0.21	1.26	34.44	6.05
29	AAAATCGGCCATGTC	C55T,T111C,C344T,A416G,C454A	45.58	20.8	4.07	1.49	25.27	2.8
30	AAAATCTATTACCTC	T137A,A141T,T162A,G239A,C363T,T386C,C467A,G554A,G617A,C624A	4.1	4.27	0.24	6.15	42.34	42.9
31	AAAATCTTAATCCTG	A120G,T390A	34.21	30.61	3.46	0.97	29.09	1.66
32	AAAATGCAACCATAC	T46G,C94T,T140C,G349T,C393T,A485T,G651A	38.88	31.23	3.51	1.36	21.44	3.58
33	AAAATGGTAGATGAC	G243A,C288T	74.24	3.45	3.35	1.73	15.42	1.82
34	AAAATGTCCAAGTTT	T325A,TG672T	54.76	17.49	1.59	1.88	21.82	2.45
35	AAAATGTCGGAGTGG	T70C,A203T,C262T,G388C,C437T,C552A,G584T	57.49	13.71	4.01	1.54	19.1	4.15
36	AAAATTGCAATGTCT	A177G,G349T,A368T,G457T,C571A	72.15	3.28	2.93	3.78	16.71	1.14
37	AAACAGCATGCATTA	AG220A,A385C,TG553T,G676A	56.87	24.6	3.22	0.7	11.67	2.94
38	AAACAGTATACAATA	G100T,A343G,T386A,C400A,G673A	58.6	13.27	3.91	1.61	21.35	1.26
39	AAACAGTGTGGAAAC	A65T,G346A,A477T,C502T,G505A,G651A,C684T	73.54	10.01	4.59	0.65	10.32	0.88
40	AAACAGTTGTAGGTC	A251G	57.2	11.81	4.55	1.86	22.51	2.07
41	AAACATATTTGACGA	G32A,T697A	51.65	12.56	6.17	1.74	25.74	2.15
42	AAACATCGTTGATTA	T274C,T291C,A337T,A365T,G676T	9.81	57.15	0.47	0.31	30.06	2.19
43	AAACCAATTGTGGGA	G230A	54.91	14.94	4.45	2.42	21.54	1.74
44	AAACCAGCCATAACT	G67A,T137C,C364G,G426C,T446C,G487T,C511T,T553A	0.37	92.26	0.04	0.08	5.67	1.58
45	AAACCCGTGATGGTA	G230T,T325C,A443T,A462G,T526C	4.63	69.42	0.14	0.56	19.64	5.61
46	AAACCTGCGAAAGCT	G332C,T354G,T432A,T504C,T536A	3.21	0.53	0	28.35	63.65	4.26
47	AAACGAACAAAATCG	A443G,G501T	3.59	89.53	0.31	0.17	5.96	0.43
48	AAACGAATCATTTTC	A365G,A408G,G460A	20.41	61.15	0.86	0.57	15.74	1.27
49	AAACGATAAAGGCGA	G244T,T374C,G391A,G507C,T545C,T625A	37.02	32.06	3.79	0.21	25.31	1.61
50	AAACGATTGACAGTC	G380GA	62.49	9.62	3.84	2.25	19.24	2.56
51	AAACGATTGTGAACT	G109A,C125A,T174C,T186C,T255C,T270G,G316A,A408G,G427A,CT503C,G517A,G524A,G559T,C591A,T669C	NA	NA	NA	NA	NA	NA
52	AAACGCAATTTACTA	T532C,T622A,G671A	54.52	15.71	5.55	1.18	20.7	2.33
53	AAACGGACACCTGAT	G72A,T200C,A226G,TG498T,G510A,C675G,G679C,A682G	47.39	5.68	1.1	19.34	23.01	3.48
54	AAACGGTGGGCCCAT	T543A	58.45	11.08	2.77	2.49	23.27	1.94
55	AAACGTCATAAGGTA	G104A,A105G,G109A,C159T,G196C,T666A	59.65	9.04	5.44	1.84	22.27	1.76
56	AAACGTGATCTATCG	G480T,A547C,C668A	31.58	33.14	1.84	2.08	24.22	7.13
57	AAACGTTACCTGATT	T218A,T249C,A494T	45.36	13.38	4.4	3.1	31.73	2.04
58	AAACTAATCTTGATG	G75T,T532C	56.48	15.08	7.02	0.53	16.67	4.22
59	AAACTATAATAATTC	G51A,T413A,CA442C,T610C	0.41	62.12	0	0.82	30.85	5.79
60	AAACTCGGTAAGTGT	G227A,C393A	45.06	24.41	4.37	1.36	22.2	2.59
61	AAACTCGTACTTATC	A268C,G370A	58.46	23.08	1.37	1.03	12.65	3.42
62	AAACTGACCTCCCCT	A44T,A252T,G362T,T469C,C576T,A689G,A694T	3.62	0.9	0.45	7.69	85.98	1.36
63	AAACTGCACTCATAA	WT	60.26	9.99	4.56	2.1	20.14	2.95
64	AAACTTAGGTAATTA	G76T,A167T	56.36	11.16	4.88	1.82	23.8	1.98
65	AAAGAGGGGGGGGTC	WT	62.52	12.87	4.05	1.11	16.73	2.71
66	AAAGCAAGTTTTTGA	T84C,G106T,T136A,C157T,C287T	78.26	1.57	5.73	1.89	11.66	0.88
67	AAAGCCTTACGACTG	G544A	57.32	10.02	4.61	1.2	25.65	1.2
68	AAAGCGTACATCTTC	G328A,C489T,T532A	61.3	21.13	3.14	1.12	11.43	1.88
69	AAAGCGTTCTTAAGT	A96T,G128A,A182T,T280C,CA437C,T581G,T666C	9.06	34.72	0.76	1.13	51.7	2.63
70	AAAGCTCTATCGGCG	WT	63.35	14.97	2.75	1.52	14.46	2.95
71	AAAGGACTGGTCCAT	C34T,G254C,T274A,A443T,G480A	1.49	80.38	0	0	14.92	3.2
72	AAAGGATGATGTCCG	T108C,C598T	69.8	12.3	2.5	1.49	11.03	2.88
73	AAAGGCCTTTGCCCA	A578G,C600T,C659T	61.33	13.42	3.55	1.37	18.2	2.13
74	AAAGGGGCTCATTAA	G66T,C454T,G690C	67.06	16.72	1.04	2.15	11.21	1.81
75	AAAGGTGTCTGTCCA	A214T,T413A,G593A	59.17	16.67	2.5	0.84	17.5	3.33
76	AAAGTATGTATACAG	T39C,T137G,G651A	60.45	12.07	3.58	1.9	20	2
77	AAAGTCACCTTCTAT	C114G,T136A,A232G,C646T	66.55	5.13	2.12	4.43	20.18	1.59
78	AAAGTCCGGCATTTG	T108C,T302C,A337G,C376A,T440C	76.38	3.69	3.42	3.81	11.44	1.26
79	AAAGTCCTTAGTTTG	G575A,T699C	56.32	17.31	5.74	1.18	15.06	4.39
80	AAAGTCTCCGCCAGG	G381A,G479A,C497T,G606T,T650G	39.51	5.47	1.83	11.09	36.17	5.93
81	AAAGTCTTTAACTGG	T29C,A141AC,T317C,T498C	63.34	3.47	3.25	2.91	25.45	1.57
82	AAAGTCTTTGCTAGT	A141T,A356T,G377T,T413A,C458A,C514A,G645A,G647A	66.89	7.3	3.39	1.89	16.11	4.41
83	AAAGTTTGTATAGCG	C138T,A181T,C312T,G480T,T536A	10.46	27.03	0.68	1.49	44.83	15.5
84	AAATAATCTTTCTAC	G98T,G575T,A641C,G656A	59.26	14.39	3.74	1.92	16.99	3.7
85	AAATACACTTCACAT	T186C,T206C,G381A,G561A	74.25	2.18	3.93	3.05	13.54	3.04
86	AAATACAGGTCACTT	C121T,C154A,C158A,C519T,T601A,T613C,G644T,A663C,A682T	39.68	3.02	2.09	3.02	48.73	3.48
87	AAATACTAAAGGATC	T207A,T291A,T302C,T317A,G645A	6.21	67.35	0.48	0.32	24.04	1.6
88	AAATACTTTATACTA	T126C,T354C,G664A	36.28	19.97	5.21	2.6	33.51	2.42
89	AAATAGAAGCTATAT	T153A,A653G	57.71	4.7	1.73	5.35	28.65	1.88
90	AAATAGCGTCTCATT	T136C,A343G,C642T	48.9	17.39	4.54	2.05	24.04	3.07
91	AAATATATAACGTAG	C145T,T321A,T498A	51.27	14.17	3.57	2.3	25.46	3.23
92	AAATATCATGGGCAA	G72A,C169A,A282G,G382T	3.31	66.61	0.17	0	25.22	4.7
93	AAATATCTAGCCATT	G319A,A425G,T459C,T553G	34.33	35.73	1.34	1.21	24.84	2.55
94	AAATATGAGCACTAC	A224T,G421A,G460A	2.4	81.03	0.3	0.24	14.41	1.62
95	AAATATGCGTCTTTT	A181T,G221A,G366A,A663G	42.99	15.85	2.73	2.19	34.24	2
96	AAATATTCATTGGTT	A299T,G584A	74.29	9.41	2.91	1.43	8.97	2.99
97	AAATCACGTCGTACA	A78T,A166G,G313A	37.89	33.3	2.75	0.81	22.26	2.99
98	AAATCACTACGCTAA	G196T	58.48	10.51	4.77	1.35	22.76	2.12
99	AAATCATTCAAATAG	G134C,C151T,T173A,G271T,C415T	39.66	27.81	4.09	1.05	25.92	1.46
100	AAATCCAGAAATCGG	C77A,G99T,T116A,C142T,C269T,T270C,A337G,C360A,G639A	80.74	2.72	3.35	1.9	9.16	2.13
101	AAATCCGATCTATTC	T111C,C135T,A385T,T401C,A641T	57.9	9.06	5.08	1.69	24.75	1.52
102	AAATCCTTTCCCGGT	T179C,T504C	3.12	1.3	0.13	15.23	62.23	17.98
103	AAATCTTATATGAAG	C63CT,C642T	59.43	9.22	4.63	1.98	22.24	2.49
104	AAATGACCTTTAAAT	T84C	55.1	12.2	4.65	1.96	23.82	2.27
105	AAATGAGAAGTTTGA	A252G	46.48	21.13	4.28	1.68	23.82	2.6
106	AAATGAGCTGTTGTG	WT	59.3	10.75	3.38	1.76	22.44	2.37
107	AAATGATTATAATAT	C121G,T335C,C345T	42.71	22.21	4.04	1.42	26.66	2.96
108	AAATGCAGTATGTTG	T504C	2.06	1.58	0.16	13.63	68.62	13.95
109	AAATGTCCTTGCTAT	G89A,A202G,T329A	69.64	6.42	2.95	2.7	16.76	1.52
110	AAATGTTTAAACGTT	A147T,A156G,T440C	62.66	7.96	3.36	4.07	20.35	1.59
111	AAATTAACTTCGTAC	A78T,C436T	53.9	13.43	3.9	1.78	20.63	6.36
112	AAATTAATACACTGG	G161A,A252T,C345T	29.82	36.76	3.78	1.2	25.5	2.93
113	AAATTACATTTTTTA	C266A	51	8.44	11.25	1.6	24.9	2.81
114	AAATTAGATACCTTA	T70C,T90C,T130C,A251G,C286T,T429C,C450A,C576T,G673T	49.53	20.89	2.94	2.78	19.46	4.39
115	AAATTAGTAATCAGG	G234A,T625A	43.43	18.99	4.38	1.2	29.88	2.12
116	AAATTATATGTCGTG	C143T,A166C,G192A,G310A,A451G,T586A	75.38	6.22	3.93	1.27	9.77	3.42
117	AAATTATCCTGGTGC	A96C	59.65	12.02	3.84	2.37	19.63	2.49
118	AAATTGATCATCAGT	T186C,T439A,T516C,A535T	58.24	2.94	2.65	4.12	31.18	0.87
119	AAATTGTCTGCACCT	T504A,C511T,GC517G,G614A	4.3	1.23	0	27.65	55.14	11.67
120	AAATTTATAATCAAA	T206C,C490A	63.49	11.02	4.17	2.52	17.25	1.55
121	AAATTTATACATTCT	T131C,A213G,G331T,T354C,C521A	72.46	4.56	5.22	0.95	16.24	0.56
122	AAATTTATTATTTGA	WT	57.29	12.34	4.66	1.26	21.66	2.79
123	AAATTTGTATTGAAA	G89T,T132C,C287A,C363T,T631A,A689G	39.17	32.16	2.97	0.71	21.23	3.75
124	AAATTTTAAAGGTCT	A202G,G461T	42.42	29.71	2.96	0.87	22.56	1.48
125	AAATTTTTATAATAA	G43T,G103A,A177C,G211A,G297C,G544C	NA	NA	NA	NA	NA	NA
126	AACAACAGCTTTTTG	A462T,C596T	61.65	14.41	2.75	1.4	17.99	1.8
127	AACAATCTAACTATA	C28T,T212C,G310T,A337G,A408G,A456G,GC510G,T516C	42.98	0	6.58	4.39	42.54	3.51
128	AACAATGTTTTCTCC	A425G,C436A,T632A	52.34	14.73	1.85	2.39	27.43	1.26
129	AACAATTATCAGCGG	WT	60.11	12.7	4.18	1.78	18.91	2.32
130	AACACCTTTTAAAGA	G30A,C138T,A268G,T389C,C476CA,C520T,A592G	63.53	2.27	8.21	2.81	21.32	1.87
131	AACACGCTTGGCTAC	C360T,T413A,G583A	30.34	43.61	2.91	0.71	19.65	2.78
132	AACAGACAATGGCGA	G378A	68.57	4.63	3.41	2.26	18.21	2.92
133	AACAGGGCTATTCC	T241A,G258T,T321G,A597G	53.18	12.73	7.31	1.47	21.99	3.31
134	AACAGGTAAGAATGG	A101G,C278A,G359A,T616C,T621C	59.89	11.28	4.39	1.86	19.12	3.45
135	AACAGTACTTTCGGC	AC156A,G221T,T335C,C552A,C640T	67.09	8.55	1.58	3.04	18.38	1.36
136	AACAGTCGACCATTA	C436T,T605A	58.41	7.59	2.16	3.82	23.5	4.51
137	AACATAAATCGGCTC	A188G,T390A,A456T,T613A,C652T	38.39	22.98	1.51	1.01	34.6	1.5
138	AACATAACTGTACGG	A541C,A594T	56.98	9.06	4.16	3.02	25.05	1.73
139	AACATACCGTATCCC	T90A,A251T,C286G,T291C,A475T	3.8	64.05	0.97	0.3	27.75	3.13
140	AACATACTAATGTCA	C151T,T504C,A580G	2.41	1.21	0.4	16.07	76.7	3.22
141	AACATATGTTCGTTG	T267A,G645A,T658C	71.86	6.3	3.77	2.13	13.62	2.33
142	AACATCAACTGACGG	G445C,T516A,T661A	1.33	0.96	0	1.33	64.38	32
143	AACATGTATACCAAC	T48A,C85T,A506G,T625A	1.96	4.85	0	19.55	68.19	5.45
144	AACATGTCTATTAAT	A177G,C463T	57.49	8.04	3.4	2.86	25.89	2.31
145	AACATTAGGTCTTTA	C142T,G445A,T459C,T504C,G635T	1.19	5.38	0	0.89	64.62	27.91
146	AACATTATCTTGCTC	T389A,C489T,TC586T	82.19	3.25	3.25	1.75	8.4	1.16
147	AACATTCAAATGATC	G128A,G318A,G673T	54.08	18.1	2.84	1.34	21.81	1.82
148	AACATTTAAAAGCCT	G32A,G97A,G103A,T347G,T373A,G544C	43.33	16.35	4.05	2.04	30.89	3.33
149	AACATTTGAGTTTCA	C369T	42.32	29.39	4.48	1.12	20.44	2.24
150	AACATTTTCTGGTAG	T394A	49.93	17.52	5.15	1.39	22.11	3.9
151	AACCAACGATATATC	A263G,A356T	53.5	15.98	3.83	1.53	22.32	2.85
152	AACCAATAATTCACA	T291A,G488A,C567T	3.2	69.5	0.36	0.25	23.01	3.67
153	AACCACTAGTCCTCA	C339T,G537T	14.09	50.16	1.64	1.05	29.28	3.77
154	AACCACTTTTAGAAA	T240A,C511T,C611A	66.06	11.8	3.95	0.6	16.04	1.55
155	AACCAGTTTGTAGGT	T386A,A443G,G656T	4.41	83.06	0.2	0.36	11.17	0.8
156	AACCATACCCTCTTG	C150T,G380T,T394A	61.5	9.57	5.5	1.65	17.38	4.4
157	AACCCACCTTGCATA	T46C,G183A,T274A,A296G,C463T,C618T,G635T	0.44	88.13	0.07	0.07	10.06	1.23
158	AACCCAGTGATAACT	A83G,A592G	56.75	6.64	4.22	3.21	27.55	1.63
159	AACCCCTTATGGTCC	A45T,C107T,A236G,G319A,A485T	69.61	8.29	4.9	2.42	12.61	2.16
160	AACCCTCCTTACACT	T195C,A220G,T347A,T361C,T543A,T625C,T672C	73.95	3.77	2.55	2.91	14.97	1.84
161	AACCGACCAGTTGGT	A220T	57.79	15.75	3.27	1.92	18.48	2.79
162	AACCGTAAAGAAAGT	C61A,G127A,G161A,C175A,C266T,T291A,T325G,A358G,G372A,A443T,T469A,A542G,T553C,A578G,TG581T,A663G	0.54	90.23	0	0	3.01	6.22
163	AACCGTTTTGTCTTT	G342A,C404T,C423T,G525A,T528G,C703T	13.02	18.78	0.75	1.17	32.13	34.15
164	AACCTAAGCCTATGG	C93T,G128A,G242A,C410A	60.01	4.68	4.5	1.26	28.47	1.08
165	AACCTAGGAGCCCAT	T116C,A166G,C184T,T241A,T335C,T392C	72.35	12.2	2.44	0.81	12.2	0
166	AACCTATATGCCTAA	G297T,T386A,C591T	0.85	79.64	0.08	0.08	18.19	1.16
167	AACCTATCTTCCAGG	TG274T,G421T,T625C	32.79	27.16	2.53	0.65	26.99	9.88
168	AACCTTAGGATAACC	A209G	57.06	8.18	4.44	1.43	26.21	2.67
169	AACCTTATACGGCGC	C411T,C423T	57.59	11.28	3.44	1.43	22.45	3.81
170	AACGACTGCTGGATA	AC156A,T247A,TG308T,C345A,T429A,T498A,C514T	63.5	13.84	5.28	1.07	14.72	1.6
171	AACGATCTGGGGAAA	A443T,A542G,T548C,T604C,T634A,G651A	3.66	80.67	0.66	0.5	13	1.5
172	AACGCCGAGTACCAT	WT	61.12	12	3.81	1.6	19.1	2.35
173	AACGGATCTAAGAGC	T108C,G123A,A160G,A213G,A263T,T361C,A416G,A456T,G524T,TC586T,G702A	0.96	0.45	0.09	5.98	10.48	82.04
174	AACGGCTTCTGCGTT	G204A,C345A	38.73	44.55	1.48	0.6	10.48	4.16
175	AACGGGAATACTCTG	T108C,A663C	57.24	6.39	2.73	2.73	28.3	2.61
176	AACGGTCCACGACAG	T327A,A358G	4.66	73.99	0.53	0.19	18.64	1.99
177	AACGGTCTCAAGTTA	T86C,C178A,A252G,T283C,G330C,T347C,T536A,G540T,C567A	37.82	0.84	2.52	21.85	36.97	0
178	AACGGTGATCTTTG	A160G,G223T	65.08	18.33	1.73	0.79	12.48	1.59
179	AACGTAGTATCTACC	A47T,C248A,G378A,C437A,G556A	65.46	9.17	7.03	1.31	14.57	2.46
180	AACGTGATAGTCGTA	T116A,T207C,T548C,G617A	67.19	12.51	3.7	1.39	12.79	2.41
181	AACGTTCAGTACGCC	C107T,A337G,T621A	72.84	6.01	3.17	1.5	14.11	2.36
182	AACGTTGTTCTTGCT	C62T,T126C,C611G,C646T	66.48	4.52	1.45	7.59	18.28	1.67
183	AACTAATTTCAATAA	G353C,A590G	68.65	3.06	4.38	3.06	19.24	1.61
184	AACTACTATTCATCC	C490A,A663T	63.31	10.64	3.65	1.78	18.56	2.06
185	AACTAGTCCTTTTGA	WT	58.12	11.14	5.44	2.55	20.58	2.18
186	AACTATCGACATTAG	T241C	59.64	9.71	4.37	1.76	22.2	2.31
187	AACTATCGTTAGGGC	G161A,A338G,C344T,A383G,G426T,G647T	33.46	23.51	1.66	1.85	27.28	12.25
188	AACTATGCTTTACAT	A177G,A213T,C687A	38.24	4.11	3.53	1.18	51.77	1.17
189	AACTCAAAAATGTAA	WT	56.04	11.1	4.98	1.97	23.57	2.34
190	AACTCACGTGTGCGT	C320T,T638C	20.26	46.9	4.09	0.16	27.13	1.46
191	AACTCAGGACTTGTC	C450A	60.87	9.37	3.98	1.25	19.63	4.91
192	AACTCGATTAACTA	T140A,G563A	55.14	8.54	2.52	4.52	27.14	2.15
193	AACTCGCAACGTCTA	C320T,G331A,GC517G,A578G,C612T,C640T	NA	NA	NA	NA	NA	NA
194	AACTCGGATACATTT	WT	57.61	10.99	3.74	2.08	22.74	2.85
195	AACTCGGTACCAGAA	T179C,C520A,C612A	50.37	5.55	2.56	4.91	32.44	4.17
196	AACTCGTATGGTCCG	G228A,G275A,G382A	37.5	15.53	4.55	1.13	33.33	7.96
197	AACTCTAAACTTTGT	T42A,G79T,G97A,G275T,T293C,T327C,A383G,C397T,C415T,T516C,TC586T,T650A,A678T	71.61	4.81	2.07	7.53	12.66	1.31
198	AACTCTCTGAATAAT	WT	56.41	12.3	3.09	2.21	23.42	2.56
199	AACTGAACTATTAAC	C164T,G445A,G693A	0.59	85.81	0.08	0	12.6	0.91
200	AACTGATTAGAAGCC	A147C,T604A,C675A	58.35	11.67	4.54	1.94	21.88	1.62
201	AACTGCCATAGGATT	G97T,G495T	57.01	11.31	3.58	3.2	20.19	4.71
202	AACTGCGCTGTATGA	A199G,A383G,G639T	61.04	12.49	4.79	2.85	16.7	2.13
203	AACTGTACGATACGA	A181G,G441C,T545A,A592T	53.85	16.49	4.27	1.54	23.02	0.83
204	AACTGTCGCTTGGAC	AC59A,AC156A,T212A,G222T,G245A,T409C,G433A,A483T,A685T	NA	NA	NA	NA	NA	NA
205	AACTGTCTCATAGTT	C37A,G80T	60.01	12.44	4	2.22	19.11	2.21
206	AACTGTTAACCGTCT	A44T,A101T,G113A,G381A,T622C,T632C	77.87	1.87	3.71	1.83	10.7	4.02
207	AACTGTTTAATTTTT	T247C,A560G	17.26	1.12	0.22	8.97	43.73	28.7
208	AACTTACAGATTTAA	G322A,A323G,A506T,A592T,G644T	0.68	76.15	0.09	0.6	17.59	4.89
209	AACTTACCAGAATCA	C700T	46.49	11.16	5.19	2.52	32.8	1.83
210	AACTTATTGCACATT	C684T	58.49	9.58	3.48	2.02	24.24	2.2
211	AACTTATTTGTATAT	WT	55.76	10.65	4.88	1.95	24.99	1.77
212	AACTTCGAAATCATC	A451G,T604G	51.32	16.8	2.97	3.43	22.06	3.42
213	AACTTCTCTGTCTAA	G75T,G510A,C615G	59.48	10.21	4.77	2.39	20.77	2.39
214	AACTTGATCTTAATA	C77T,T131A,A219T,G297A	0.69	69.51	0	0.16	28.25	1.38
215	AACTTGGAAACACGA	A220T,T255A,A368T	42.07	31.65	2.55	1.24	19.74	2.74
216	AAGAAACATTTAATC	G417C	59.16	9.32	5.15	1.93	22.83	1.6
217	AAGAAATCGCGCATT	T162C,G366A	49.43	22.06	3.23	1.4	19.69	4.18
218	AAGAAATTTCTTATG	T136A,C198A,T225C,C435T	61.77	6.73	3.59	2.11	17.88	7.92
219	AAGAAGTCAATAAGT	T289A,T386A,A408G,G444T,A609T,C627T,C675T,G686A	0.73	87.86	0	0.16	10.74	0.51
220	AAGACACCCAAGCAA	WT	60.44	11.68	4.52	2.49	18.1	2.77
221	AAGACCTATCAACTG	C28T,A213G,A533T	55.14	15.07	3.6	1.54	20.55	4.1
222	AAGACGGGTGGGACT	T153C,A356G,C464A,G574A,C624T,C703A	3.91	81.24	0.56	0.07	8.93	5.29
223	AAGACTGATACATTC	C62T,G128A,A416T,A425G,A477T,T532A,G555C,A578C,T625C	23.52	61.2	1.33	0.49	9.27	4.19
224	AAGACTTCCATAACG	A209G,T655C	54.96	8.64	4.19	1.48	28.06	2.67
225	AAGAGACTTATACAT	A88G,G695A	15.74	1.96	0.65	10.82	70.17	0.65
226	AAGAGAGATGTCGCT	T38C	57.42	11.26	3.95	1.61	23.7	2.07
227	AAGAGCAACTACGTG	WT	55.67	12.29	3.76	1.64	23.75	2.89
228	AAGAGGTGGATACGT	C642T	56.5	10.97	3.58	1.82	24.76	2.36
229	AAGAGTAGCGGGGAT	G381T,T666C	58.38	3.13	1.49	2.62	18.61	15.77
230	AAGAGTATGTATGCG	T170C,T394G,C502T	67.56	13.37	5	0.81	12.76	0.5
231	AAGAGTTGTTCTATT	G217A,A513T,C520T,G639A	65	14.52	5.32	1.29	12.5	1.38
232	AAGATAAACGTAATA	T39C,T329C,C703A	72.47	2.13	6.39	2.66	15.1	1.24
233	AAGATCCTCAACGGG	C28T,C149A,A385T,G595A,C637A,C700T	43.3	26.75	7.68	0.97	17.82	3.48
234	AAGATCTGGTAGGAA	T173C,T409C,G575A	61.95	13.4	2.87	0.48	16.99	4.31
235	AAGATGCATAGCCAT	C640T	64.8	12.71	2.87	1.5	15.71	2.4
236	AAGATGTTCTTACTT	C312T,G348T,A383G,G395C,C450T,T509C,T557C	43.86	23	6.48	1.59	22.89	2.17
237	AAGATTTCGGTCAAC	C41A,A443T,C454T,T638A	4.73	76.97	0.38	0.35	16.58	0.99
238	AAGATTTGTGCATGA	C159T,A252G,G328A	51.31	19.41	3.48	1.11	22.13	2.56
239	AAGCAAACAGGCCCT	C55G,T325C,G449A	29.55	45.92	1.51	1.51	16.94	4.55
240	AAGCAACTTTCAATC	C41G,G215A,T321C,T386G	54.26	4.04	4.04	1.17	34.21	2.27
241	AAGCACGTAGCAAA	A513T	64.58	19.27	3.01	1.16	9.57	2.4
242	AAGCAGAGTTAGTCG	T413A	53.48	19.3	4.56	1.84	18.38	2.44
243	AAGCAGTATGTCCCT	C28A,C124T,A199T,A296T,C320T,T565A	0.36	89.44	0	0.09	8.82	1.29
244	AAGCAGTGTTCTCTA	WT	58.86	12.78	4.35	1.4	20.22	2.38
245	AAGCATGCCCGCAGG	C129A,G215C,T303A	60.33	4.04	4.38	1.8	23.95	5.51
246	AAGCATTATAGATCA	G56A,A78G,T302C,A343T,G366T,T413A	44.34	22.17	4.26	1.74	25.47	2.02
247	AAGCGGAAGGAAGTT	T137A,C281A,T325A,C363T,T413A,T516C,C598T,C703T	31.98	30.48	3.3	1.05	28.98	4.2
248	AAGCGGACAGTCTTG	A285G,C662T	39.77	18.36	2.01	2.89	34.63	2.33
249	AAGCGGTCCAGATTA	T42G,A45G,A83T,C158T,A494C,G496T	51.89	9.3	3.3	3.63	25.37	6.51
250	AAGCGTGGCGTGCAT	T186A,G230A,G318T,T325C,T459C,G595A	76.32	2.28	3.99	1.25	14.35	1.81
251	AAGCGTTTTGTAAGA	T195A,T643C	62.74	13.55	3.72	1.66	15.87	2.47
252	AAGCTAATCCAGTC	A268G,C397A,C464G,G664T	71.33	3.35	4.86	1.33	11.37	7.76
253	AAGCTCGCTCACCTG	A141G,T562C,TC586T	62.52	16.71	3.1	1.14	14.04	2.49
254	AAGCTCTTCAGGGAT	C406T,G500T,C514T	69.9	10.23	4.78	0.97	12.34	1.78
255	AAGCTCTTTATTTCC	A246G,C345A,A485C,T539G,A641G	22.97	35.14	0.68	2.7	35.14	3.38
256	AAGCTTTTCATTATC	C37T,C41A,T136A,A252G,G452A,T586C,C649T	49.39	17.07	3.75	1.45	25.54	2.78
257	AAGGACAGTTTTTTC	T117C,C265T,A285T,G457A,G479A,A506T,A590T,C627T,T632C	2.53	40.08	0.15	14.12	35.32	7.79
258	AAGGAGTGACTGATG	T90A,T173A,G370A	54.14	18.44	3.05	1.5	19.93	2.95
259	AAGGATATATCGTTG	G264C,T465C	69.69	4.42	5	3.1	16.3	1.49
260	AAGGCGGATGGACAG	C41T,G331A,G353C,G555T,G569A,T622C,G656A	67.49	0.52	1.92	3.01	9.53	17.54
261	AAGGCGGGGGCAGTA	T136C,A181T,C511T	64.45	12.52	5.48	1.26	14.52	1.77
262	AAGGGCTTAAGTGCG	A26T,T38C,G187A,TA218T,T440C	52.47	13.12	3.42	3.8	25.48	1.71
263	AAGGGTAATCACATA	G233T,T293C,G322A,A694T	13.4	6.7	0.24	7.89	71.53	0.24
264	AAGGTAAACAACCCC	T329C,C497A,T643C	78.64	1.65	3.37	3.02	8.56	4.76
265	AAGGTCTACAAGGCT	A156G,G215A,C407T,A535G,A592T	37.71	6.92	2.62	0.72	50.84	1.19
266	AAGGTCTTTACGATC	A428G	27.32	51.55	2.11	1.14	16.91	0.96
267	AAGGTGAAACGTCGT	T115C	65.59	10.76	3.16	1.94	16.58	1.97
268	AAGGTGGAATGGGAG	TG70T,T562C	60.89	13.12	4.32	1.62	17	3.04
269	AAGGTGTCCAAAGTC	C62T,T102A,G113A,A118T,T140C,G230A,A425T,C503A,T504G	6.2	1.38	0.17	14.03	33.38	44.83
270	AAGGTTTATATTAAG	T153C,C157A,A356G	3.78	73.3	0.8	0.4	18.85	2.86
271	AAGTAATATTCACAG	T29A,C478G,G676A	58.54	12.22	3.52	2.22	21.73	1.76
272	AAGTAATCTATTATG	G91A,T117C,A268G,G500A,TG581T,T605C,G614A	65.87	11.65	6.83	1.6	11.92	2.14
273	AAGTACGTATTTAAG	T31A,A78G,C92A,C135T,A456C,A483G,A547T,T631A,G664A	70.67	5.58	4.42	3.84	9.08	6.41
274	AAGTACTAGATGGTG	T122A,C150T,G496A,A506G,T616C	1.54	10.58	0.19	24.81	47.89	14.99
275	AAGTATACATATAGG	A494T,G569C	55.72	11.02	5.37	2.69	23.15	2.05
276	AAGTATCACGGGCTG	T704G	64.03	11.74	3.35	1.61	17.12	2.15
277	AAGTATGACATATTC	T283C,A338T,C398T,C410T,A451T	59.8	3.3	6.75	1.48	22.08	6.59
278	AAGTATTAAATATAT	T293C	62.59	4.31	5.9	2.56	22.45	2.2
279	AAGTCAAAGGCGTTT	A78G,C124A,T126A,T586C,T616C,T701A	59.11	8.87	4.63	2.04	23.31	2.04
280	AAGTCACTATGTTGT	G674A	57.47	13.23	3.39	1.59	21.91	2.41
281	AAGTCAGACCACTGT	T53C,A263T,A451T,C652T,G664A	60.18	7.97	3.98	2.53	22.8	2.53
282	AAGTCAGAGACAGCC	T543A	58.15	11.39	3.71	1.43	22.93	2.39
283	AAGTCAGAGGCCTGG	C64T,AG220A,G328A	46.95	20	3.57	1.27	26.3	1.91
284	AAGTCCAACAATTCA	T122C,T420C,CA571C	70.31	13.91	2.55	1.8	8.61	2.82
285	AAGTCCACATTACGT	A47T,G91A,G460T,T628C,A648T,T672A	34.66	29.81	3.26	2.05	28.89	1.33
286	AAGTCCTCGGAGGTC	A246T,T277C,C450T	66.43	7.73	6.92	1.47	14.4	3.05
287	AAGTCCTTATATGCG	A191C,G352T	68.79	3.69	4.29	1.95	19.55	1.74
288	AAGTCGAAACCGAGT	T31G,C530T	62.62	9.24	2.48	2.62	20.56	2.48
289	AAGTCGAATGAATAT	T126C,T173C,T661A,A678G	61.35	8.46	1.76	4.06	21.73	2.64
290	AAGTCGCAGCGCGGA	A365T,C376T	24.36	47.97	2.39	0.91	19.9	4.48
291	AAGTCTCCCAGCAAG	T162C,A181G,G211A,G318T,C512T,G623A,G664A	NA	NA	NA	NA	NA	NA
292	AAGTCTCGCTGCCAA	C158T,A219C,C231G,T241A,C442T	19.67	57.99	1.58	0.85	18.09	1.82
293	AAGTCTTATGTGGCT	C400A	58.28	7.7	4.08	2.21	26.49	1.24
294	AAGTGAAGGAATATT	G276A	74.14	3.11	4.51	3.21	13.51	1.5
295	AAGTGCGCAAAATTA	C64CA,A199T,T548C,A663T,C675T	64.74	11.52	3.17	1.71	16.02	2.84
296	AAGTGGAAAGTGGTT	A45T,T216A,T303C	71.47	2.87	3.82	2.51	17.9	1.44
297	AAGTGGTCTAAAAAA	C34A,A338T,A408T,T548C,G639A	48.05	20.44	5.33	1.11	19.61	5.46
298	AAGTGTTACTGGATT	C41T,A78G,T108C,T137C,T293A,T335A,C400A	2.43	47.57	1.52	0.15	41.49	6.83
299	AAGTGTTGCATTGAA	G56A,C85T,A188G,G353A,G357T,G500T,A535G,T536A,C612A,T634C	61.75	3.85	2.77	1.07	30.11	0.45
300	AAGTTAAAGATCAT	G540A,A648G	28.25	2.29	1.07	9.16	57.56	1.68
301	AAGTTACTAGATAAT	WT	55.01	11.48	3.99	1.97	25.02	2.52
302	AAGTTAGTAAGTAAT	C28T,T116C,A219T,T308A,C360A,G370A,A443T	4.53	77.99	0.36	0.27	15.85	0.99
303	AAGTTATAGGCGACT	T153A,G372A,G585A	55.77	26.15	2.69	0.82	11.11	3.46
304	AAGTTCACTCATTAC	C138T,G599A	56.22	11.43	3.78	1.79	24.2	2.59
305	AAGTTCTTATGATCG	G486A,G501A	54.48	12.83	5.13	1.58	18.86	7.12
306	AAGTTGTCCGCTACT	WT	62.89	11.68	3.43	1.48	18.19	2.32
307	AAGTTTACTTTGATG	C33T,A83G,A105T,T136A,A152T,C231T,T283C,T516A,T562A,G569A,C570T,C665T	0.59	1.18	0	8.42	82.77	7.04
308	AAGTTTAGCGATTTC	G305A,C571T	70.05	1.47	3.19	5.57	19.43	0.29
309	AAGTTTGCATTGTAG	G104T,T504C	1.86	1.45	0	11.98	71.28	13.44
310	AATAAAAAAAGTACG	T115C,A578G,T699A	62.22	13.46	4.29	1.62	14.73	3.67
311	AATAAAAAACGTTCG	G221A,G353A	78.46	1.23	3.63	2.56	13.27	0.84
312	AATAAAAGGATACAA	WT	58.21	11.29	4.33	2.07	22.05	2.05
313	AATAAACCAAGCATA	G264T,A477G,T661C	69.41	4.12	3.26	2.61	18.87	1.74
314	AATAAAGTTATAGAT	C107A,T162C,G272A,T321C,A447T,T536A,T543C,C630A,A689G	16.24	44.8	1.5	8.48	13.76	15.22
315	AATAAATATTTAAAA	C292A	8.8	55.36	1.26	0.35	31.61	2.62
316	AATAAGCAAAATCTC	A334G,A356G,G574A,G686A	4.56	80.5	1.01	0	8.86	5.06
317	AATAAGGACACTTTC	T117A,G128A,T321A,A383G,A385G,A641G	35.52	40.47	3.93	0.97	16.76	2.36
318	AATAATATTTTTTCA	A26T,A188C,T195C,T386C,G569A	64	10.99	5.29	1.04	16.49	2.17
319	AATAATCAGTGATAC	T117C,T186C,C339T,T650C	15.75	52.08	0.44	1.31	27.57	2.85
320	AATAATCCCTACTAG	C34T,T333C	63.53	3.26	6.29	2.45	23.19	1.28
321	AATAATTAGTCACTC	A213T,A252T,A268G,G311A,T386C,A447G,C455T,C511A,A513G,G534C,T699C	18.96	29.68	1.92	1.65	43.41	4.38
322	AATAATTTGATGTCA	T53A,G72A,T329A,T666C	73.61	4.18	1.25	5.75	13.67	1.53
323	AATAATTTGGTCATC	T491C,T634C	55.72	9.87	3.35	2.26	24.46	4.34
324	AATAATTTGTGCGAT	T126C,T162A,T186C,G258T,G328A,C400T,T666A	55.08	13.44	3.6	0.65	24.26	2.96
325	AATAATTTTCATCTG	T565C	59.26	11.94	4.67	1.42	19.53	3.17
326	AATACAGTGGTCCGG	A425T,C521T,C522T,T610C	67.11	5.33	4.85	2.74	17.36	2.61
327	AATACATTCGAAATA	G109C,T317A,T420C,A494G	62.48	7.06	5.33	2.17	20.5	2.45
328	AATACCTAAATAGAT	C178G,G192A,A246G,T303C,G353A,C393G,T526A,T696C	NA	NA	NA	NA	NA	NA
329	AATACGAGATATCGA	G211A,C287A,G306C,T351C,G388C,T420C,G569C	2.56	0.43	24.25	0.86	60.63	11.28
330	AATACGAGCATCAGT	A83G,A246T,G298A,T315C,A560T,T672C,A681G	23.52	39.83	1.02	0.56	31.77	3.3
331	AATACGAGGGCTGCA	C324T,C454T	32.06	37.94	4.41	1.18	22.06	2.35
332	AATACGCAAATTAAT	WT	55.36	13.25	4.05	2.21	22.67	2.46
333	AATACGTCTCGCATT	T195A,T241A,A356G	4.76	77.62	0.94	0.04	14.83	1.81
334	AATACTACACCACTT	A118G,A147T,T173C,A220G,G318A,T658C	50.37	15.58	2.36	1.63	27.36	2.71
335	AATACTACTCGAACG	G73A,C363A,A385G,G480T	28.66	46.48	0.99	1.12	13.06	9.7
336	AATACTGATGCACAA	G79A,C145G,T498A,T605C	62.53	14.04	3.37	1.92	14.83	3.3
337	AATACTGCATTACTT	WT	55.84	12.27	4.15	2.01	23.32	2.42
338	AATACTTATGGTCTT	G100T,T241C,T509C	56.56	8.34	4.87	3.37	23.88	2.98
339	AATAGAACCAAAATA	WT	58.84	11.57	4.68	1.59	21.34	1.97
340	AATAGGCGAATGACA	G430A,G656A	38.25	27.35	1.5	2.14	27.99	2.76
341	AATAGGGTTAAATCT	C158T,A177T,A682T,T688A,G693A	44.6	12.43	6.22	1.89	33.78	1.08
342	AATAGGTAATAAAAT	A69G,C119A,C404T,C437T,T459C,G651T,A678G	47.28	7.88	1.91	2.72	37.5	2.72
343	AATAGGTACCGCTTT	WT	60.15	12.41	3.82	1.91	18.66	3.04
344	AATAGTACAAAGCTA	C178T,T207C,A209G,G322A,A533C	NA	NA	NA	NA	NA	NA
345	AATAGTACTCCCCAC	WT	61	12.62	4.24	1.83	17.83	2.48
346	AATAGTATGCGTATG	A220G,G484T,T628A	51.11	6.91	3.87	2.48	34.53	1.1
347	AATAGTCTATGAATT	WT	55.7	12.19	4.32	2.04	23.78	1.97
348	AATAGTGCCGTATCG	T53C,C61A,G97T,T179A,G210A,A494G,A533T	53.15	16.97	5.9	0.74	16.6	6.63
349	AATATAAAAGTATGT	T70C,T283C,A443G,G538A	3.47	79.87	0.38	0.04	14.99	1.25
350	AATATAATATCCCTG	G244T,G259A,A572C	63.38	7.69	5.07	1.62	19.16	3.08
351	AATATAATTAACTGA	T108A,T162A,G183A,G259A,T347C,G388A,C442T,G623A	35.21	36.96	0.87	0.87	21.74	4.35
352	AATATACTACGTACA	WT	57.64	10.54	4.37	1.81	23.21	2.43
353	AATATAGATGATGTA	A219T,A663T	55.07	8.7	5.51	2.6	25.79	2.32
354	AATATAGCTAACATG	C85A,C121T,C248T,T354A,C530A,G690T,T701A	39.42	1.46	0.97	21.17	30.66	6.32
355	AATATAGCTCGCACT	G426T	43.66	17.66	3.3	1.49	20.77	13.11
356	AATATAGTCCCCTAC	G183A,T469A	52.78	25.32	1.29	2.15	16.31	2.16
357	AATATATGGTACTCG	C142A,C248A,A523G,G702T	0.9	0.49	0.16	12.82	48.06	37.56
358	AATATATTAAGAGCT	G27A,G98T,T102A,A282G,T557A,G606A,T632C	5.72	62.56	1.32	0.11	26.43	3.86
359	AATATCAATATTAGG	WT	57.06	10.35	5.48	1.69	22.86	2.56
360	AATATCATCTAATTA	A65G,C519T	51.75	6.66	4.73	2.8	31.97	2.1
361	AATATCCTTGAACAG	A285G,G500A,C615T	36.16	36	3.08	1.11	22.04	1.61
362	AATATCTTTTAACGT	T249A,C314T,A337C,G370T,G449A,G505A,T543C,C652T	0.46	90.58	0.09	0.03	7.04	1.8
363	AATATGCACGTACGT	T108C,T122C,G470A,G656A	41.74	20.06	2.15	2.76	31.05	2.24
364	AATATTATAAAAGAT	T401C,T429A,A506G,C598T	1.25	4.17	0	21.84	66.19	6.55
365	AATATTATAGGGACT	A96G,T270C,A296T,G319C,G353A,G529A	1.1	58.72	0.33	0.22	37.54	2.09
366	AATATTCCAAACTTC	T516C,G651A	57.36	9.5	3.31	2.7	24.32	2.8
367	AATATTCGGTCTTTT	A232G,G674A	62.94	9.41	5.31	1.9	17.76	2.68
368	AATATTCTTAATAAA	C133T,C393G	50.34	13.41	5.46	1.48	27.48	1.83
369	AATATTCTTTAGGGA	G75A,G210T,C266A,G326A,A368G,C442A,A443G	2.74	56.24	0	0	39.51	1.51
370	AATATTTAATAGGAG	A69G,G331A,T562A,C630T	67.69	0.86	4.5	4.31	21.47	1.16
371	AATATTTGGTGGAA	AC59A,G517A	58.28	19.13	3.1	0.91	15.85	2.73
372	AATCAAACTACCTTG	C33G,C36T,G444A	1.66	90.27	0.02	0.17	6.86	1.02
373	AATCAACCGTGAGAA	C598T,C630T	60.62	9.43	4.34	1.79	21.54	2.28
374	AATCAAGTTTTAATC	T173C,T321C	68.06	5.76	3.36	2.93	18.18	1.72
375	AATCAATCGTATCAG	G97A,G123A,A194G,A368G,AC462A	58.99	14.17	2.56	2.02	18.41	3.85
376	AATCAATTAATGTGG	T504C,GC569G,C596A,A648G,T661C,A667T	3.52	2.02	0	15.87	66.25	12.34
377	AATCAATTTTTCTAT	T335A,T562A	53.73	11.39	3.2	1.25	27.75	2.68
378	AATCACCTAACGGAA	T140C	58.54	12.19	4.14	1.66	21.25	2.23
379	AATCACTTAACGTCG	T270A	65.77	9.69	2.71	1.56	18.42	1.84
380	AATCAGAAATCGTAT	T491A	60.39	11.59	4.23	2.42	19.66	1.7
381	AATCAGTGAACAAAT	C143A,G244A,TC586T,T650C	64.67	6.41	1.87	3.04	21.87	2.13
382	AATCATAATTTAAAG	G113A,C612T	58.53	9.6	3.58	2.87	23.35	2.06
383	AATCATTGAGTTTGT	A224G,T249G,T601A	57.18	13.02	3.34	2.22	22.4	1.84
384	AATCCATTCATATAT	T116A,A147G,G322T,C503G,T620G,A667G	13.28	13.81	0.8	3.62	54.71	13.79
385	AATCCATTCCCGCGT	T102C,C142G,T562A,G606A	66.09	7.27	2.61	2.33	19.2	2.5
386	AATCCGCGACTATTA	G260A,G370T,A408T,T613C	14.91	58.67	0.85	0.71	21.73	3.12
387	AATCCGCGTTCAGTA	WT	62.59	12.59	3.92	1.3	17.68	1.93
388	AATCCGTATATAATT	T130A,G272A,G340A,A592T,G614A,A694G	21.35	0.45	0.67	37.3	40.22	0
389	AATCCTCAAATATAT	A188G,A358T,T516A,G566A	2.18	1.22	0	6.12	76.3	14.17
390	AATCCTCCACCTTCC	G534A	66.34	8.8	2.51	2.65	16.67	3.04
391	AATCCTCCAGCTGA	A78G,G569A	64.33	18.5	3.85	1.52	9.74	2.06
392	AATCCTTATCCCCAA	C55A,G510A	66.41	8.49	4.93	1.83	15.83	2.51
393	AATCCTTGTCTCTAC	C125A,G402T,T498C,C662T	30.71	4.4	1.27	5.79	55.97	1.85
394	AATCGACTTTATTTC	A105T,A160T,G230A	52.26	17.1	2.85	1.66	23.76	2.37
395	AATCGATGATACTAT	A365T,A438G,G564A	39.03	33.76	3.95	0.94	18.96	3.36
396	AATCGCCATTTAAGT	G95T,C149A,A182T,A203G,G228T,T409A,C665T	37.61	12.39	3.54	2.65	42.48	1.32
397	AATCGCTTCATGGAA	C364A,C397G,GC517G,T625G,G635T	44.23	1.34	1.77	8.75	36.98	6.93
398	AATCGGACGATGCCA	AC59A,C93T,T131A,A167T,T321A,G353A,C398T,C530A,A542G,C570T,A590G,G617T	9.29	0.85	0.19	35.07	52.14	2.46
399	AATCGTAATAATACT	A226T,A232G,G272A,C287A,G531A,T565C	79.62	1.34	4.44	4.94	8.05	1.61
400	AATCGTACATTTTAA	G91T,C287A,G554T,G568A,C687T	50.31	6.22	3.76	2.89	24.42	12.41
401	AATCGTCATTCGACC	C164T,G196C,T586G,T631C	63.95	10.36	3.05	2.5	17.35	2.79
402	AATCGTTCAATATAA	C36G,T102C,A224G,C467T	20.85	57.43	1.87	1.08	17.48	1.29
403	AATCTAAGATGGGGG	A44G,A65T,T117G,A263G,T389C,C410A,C418G,G599T,T616C,T620A,C640T,C668G	60.44	18.92	0.65	2.2	10.91	6.87
404	AATCTAATAGGATGG	WT	58.4	10.84	4.76	1.4	22.05	2.56
405	AATCTACTTAGCCTT	A82G,T130C,C139T,T270A,A337G,T361A,C453G,T469C,A533G,G633A,G670A	44.75	32.02	2.07	1.8	18.51	0.86
406	AATCTAGCACTCGGA	A47T	52.55	12.89	5.31	2.24	24.87	2.14
407	AATCTAGTAATTTAA	G80T	57.42	12.47	3.77	2.23	21.95	2.17
408	AATCTATTTAGCATA	T173C	56.43	11.94	3.84	1.93	24.14	1.73
409	AATCTCATACGCGTA	A285G,G377A	52.55	16.84	3.32	1.78	22.7	2.8
410	AATCTGACTGTTTGA	G636A	53.41	17.67	4.57	1.51	18.94	3.9
411	AATCTTATCTTACTA	C85A,A120G	54.62	9.65	4.28	1.79	28.26	1.4
412	AATCTTATTACCCTA	T241C,A456T,T622A	57.64	11.76	3.29	2.59	23.06	1.66
413	AATCTTATTTCCTAG	T545A	54.14	14.73	4.64	1.88	22.39	2.22
414	AATCTTCAACAAGTG	G313A,G457T,A494G,T548C	38.63	33.13	4.91	0.77	18.33	4.24
415	AATCTTCCGAAGCTC	T516C,A523T,G599T	1.66	0.39	0.1	6.07	23.21	68.57
416	AATCTTCTAATTAAT	T90C,G346A	66.17	6.13	3.83	3.04	18.04	2.8
417	AATCTTGTTCAAACA	A78T,T162C,A166G,G417A	64.46	11.53	3.54	1.94	16.51	2.01
418	AATGAATGTCAAGTT	T140G,A194G,G229T,C339T,G362A,CT468C,T553A,T638A,T650C	2.28	50.86	0.28	0.34	43.32	2.91
419	AATGACAGGTGCCAT	G75A,A120G,T389C,C642T	66	5.39	5.23	2.45	19.35	1.57
420	AATGACGCAGCTTGT	A88T,C324T,T553A,C577T,T616C,G647A	29.5	13.72	1.77	3.09	50.73	1.19
421	AATGAGAGCGCGGGG	T335C,T632C	64.45	12.2	3.91	2.01	15.76	1.66
422	AATGATATCGTCATG	G595T	60.37	14.02	4.37	1.59	17.6	2.04
423	AATGATGCATCTAGT	T315A,C503A,C518T,T526C,C612A	9.72	2.54	0.84	10.57	68.08	8.25
424	AATGCACCTAAATTT	G484C,C637T,C654T,G674A,A681G	55.8	9.03	3.78	3.06	26.34	2
425	AATGCATTTTTAACT	C41T	54.09	12.08	5.02	2.41	24.1	2.29
426	AATGCCGCCATGGGT	C36T,T672C	67.17	14.45	3.5	1.4	11.03	2.44
427	AATGCCTTCTAATGG	A188T,C312A,C468T,G544A,T643A,T650A	45.28	9.72	5.28	2.78	35.28	1.67
428	AATGCGAATACATAT	T401C,G414A,T610C,G691A	5.15	0.51	0.51	21.91	71.91	0
429	AATGCGGCTAAATGA	C175T,C466T	48.68	19.47	2.21	1.77	24.34	3.54
430	AATGCGGGGGGCGCA	T137C,C154A,A171G,T392C,A473T,T553C,T621C,T672C,T697C	69.69	13.31	1.71	2.22	12.54	0.53
431	AATGCTTGAGATGAT	A203T,C698T	60.04	10.36	4.57	1.88	20.29	2.87
432	AATGGAAATGTCAAT	G644A,C675G	63.29	11.83	1.99	2.06	18.14	2.69
433	AATGGAGGATTTACA	A105G,A246T	56.44	10.44	6.22	1.77	22.44	2.68
434	AATGGGCGAGTTAAT	G113A,A560G,A681G	19.24	1.19	0.54	20.43	27.83	30.76
435	AATGGGGCTATAACT	C107A,C612A,T620C	58.99	11.02	3.97	2.74	20.19	3.09
436	AATGGGTGGGGGTTG	T173G,T394C	70.14	3.54	5.1	2.39	16.96	1.87
437	AATGGTACGGGAGCT	G391A,T504C,T539C,T605A	2.43	0.81	0	9.55	73.13	14.08
438	AATGGTATTTATGCT	T126C,G357A	47.73	17.63	4.01	1.96	26	2.68
439	AATGGTCAAGACAGT	C60G,T116G,A118G,T131A,G183T,A578T,C589T,T613A	63.88	8.21	2.7	1.45	19.84	3.93
440	AATGGTCCTGACCCA	G353A	85.22	0.97	1.6	3.33	7.98	0.9
441	AATGGTTTATTCCGT	A44T,G49C,A69G,T140A,T341C,G362A,A383G,G569A	67.42	6.21	4.79	1.2	19.17	1.21
442	AATGTAAGAGACCTA	G99T,T206A,A251T,G258A,G350A,A368G,A425G,G651A,T669C,A678T,A682T	71.76	0.84	2.92	4.17	18.45	1.87
443	AATGTACATGGAGCT	G99T,A213T,T225C,T283A,T291C,T317C	2.03	49.2	3.66	0.81	38.22	6.09
444	AATGTAGCACTTCG	G564A	62.66	18.69	3.16	0.77	10.48	4.24
445	AATGTCCCAATCACC	A65G,C552G,C675T	63.97	11.72	4.12	1.84	16.25	2.11
446	AATGTCCCTGTGCAT	C55T	56.51	9.29	5.58	1.86	24.9	1.86
447	AATGTCTCTATGGCA	C41A,A45G,A213T,T303A,C434T,C520A	19.61	2.94	1.96	6.86	65.69	2.94
448	AATGTGCTACATCTA	A47G,A182G,C497G,C618T	41.52	8.65	4.24	8.12	31.62	5.85
449	AATGTGTGTCTGCTA	G73A,GA100G,T225A,C369T,A523T,G677A	0.54	0.63	0.09	6.88	23.29	68.57
450	AATGTTACATTAAAC	TG111T,A181G,T516C,C624T,T704C	57.07	11.9	3.11	2.41	21.73	3.79
451	AATGTTCCGACATCA	WT	62.53	10.46	3.88	1.25	19.7	2.18
452	AATGTTCCGGATTAA	A323G	30.54	31.69	3.61	1.33	29.03	3.8
453	AATGTTGCAGGCGAT	A253C,A358G	4.12	80.81	0.23	0.11	12.52	2.2
454	AATTAAAACAATCGC	AC59A,G73A,A191T,A199G,G319A	61.98	9.05	4.67	2.62	19.73	1.95
455	AATTAAAATTGCCCA	G313T,G644A	30.93	34.04	2.75	0.86	28.66	2.76
456	AATTAAATTCCAAA	TG102T	63.22	13.5	3.41	1.47	15.05	3.35
457	AATTAACCAGCTTCG	T195C	61.15	12.72	4.36	1.66	18.14	1.97
458	AATTAAGCATCTAAC	T31G	52.23	11.05	4.47	1.38	28.52	2.35
459	AATTAATAATGTGTG	G104A,C169A,T249C,G305A,G362A,C369T,T553A,T660A	62.06	5	3.68	2.62	25.56	1.08
460	AATTAATTCGAAAAA	T50C,A203G,T249C,A578G	53.02	14.78	5.11	1.21	23.18	2.69
461	AATTACATACCATCC	WT	56.91	11.65	3.96	1.32	24.4	1.76
462	AATTACCAAAAACCG	C41T,T140C,C197T,A682G	65.76	10.33	5.98	2.17	15.76	0
463	AATTACCCAATCAGA	C61T,A365T,C514T,G679T	48.51	35.67	4.94	0.44	7.8	2.64
464	AATTACCTGCATACG	A492T,T601C	53.82	10.71	4.68	2.58	27.06	1.15
465	AATTACGTCAGATCG	C125A,T386C	63.28	6.49	5.25	2.21	20.58	2.2
466	AATTAGAAGCAGCAC	C155A,G217A,G322A,C434T,G510A	26.02	33.48	2.82	0.63	25.95	11.11
467	AATTAGGCAATCCTT	T666A	57.32	11.91	3.47	1.62	22.21	3.46
468	AATTATGTGGTGTGG	T274A,G319A,G346C	69.75	7.77	2.33	1.86	16.32	1.99
469	AATTATTTCTTGCGT	T140A,G346A,G387A,T413A	45.85	25.91	3.32	0.83	21.1	2.99
470	AATTCACATTGTACA	T136C,C411A,T632C,A689T	74.64	3.87	4.41	1.65	13.91	1.51
471	AATTCACGGCGCAAT	C404A	66.79	6.26	4.67	2.55	18.23	1.5
472	AATTCACTGCGTTTT	A202T	61.16	10.74	3.17	2.48	20.52	1.93
473	AATTCATCGGAAGTT	G243T,G346T	66.27	6.41	4.37	1.6	18.89	2.45
474	AATTCCCCTAGACGG	G217A,T308C,C497T	64.84	0.88	2.1	11.34	17.31	3.52
475	AATTCCGCAGTGTCT	C129T,G189T,T351A,T361C	77.54	0.94	3.83	3.08	12.65	1.95
476	AATTCGAGTAAACCT	C33T,G227A,T329A,A338G,G388A,A438G,C591A	55.26	7.81	4.09	2.66	23.35	6.84
477	AATTCGTAAAGTGTA	G426T,G555A,C665A	39.91	18.76	4.26	0.78	20.78	15.51
478	AATTCGTTAGTGTCG	A365G,G448A,G510A,G683A,T704C	76.15	1.61	5.38	2.36	12.49	2.02
479	AATTCTAGTGGTATG	A282T,G319T,A338T,T354A,A385G,G391C,G426T	37.26	15.02	3.1	1.86	26.74	16.02
480	AATTCTTCAAATTAA	A268T,T386C,T419A,G472A	59.74	4.25	4.25	2.29	25.54	3.92
481	AATTCTTTTCAAACT	T122A,C159T,G318T,G366A,C412T,A549G	44.99	20.39	1.95	2.91	24.92	4.85
482	AATTCTTTTCTGGCA	A188G,A251T,C570T	49.7	4.54	2.63	3.8	38	1.33
483	AATTGAATCTTAGTT	WT	58.42	10.74	4	1.85	22.67	2.31
484	AATTGACGTTATTAT	WT	60.33	10.11	3.89	1.9	21.52	2.25
485	AATTGACTTAATAGC	A78T,C110T,C144G,G306A,G471T,C520A	61.9	1.08	1.53	11.32	23.22	0.95
486	AATTGAGTTTCAACC	WT	59.9	11.41	3.28	1.76	20.53	3.11
487	AATTGCATCTTTGAT	A59T,T179C,G362C,G554A	6.18	4.05	0.55	3.71	31.61	53.89
488	AATTGCATTTTACCA	A301G	56.54	13.44	4.86	1.95	21.01	2.19
489	AATTGGACAACGCTT	TG581T,C700G	65.75	12.52	2.97	1.51	14.57	2.67
490	AATTGGCGAAGTCAC	A191T,T351A,T613C,G617A	76.01	2.11	2.86	2.61	14.59	1.82
491	AATTGGGATAATGCC	A220T,TG469T,T601A,T643C	45.54	19.68	2.65	2.98	23.21	5.94
492	AATTGGGGTGACAAT	T48A,G639A	53.67	13.87	6.65	2.22	20.52	3.06
493	AATTGGTCTAAGTTA	WT	56.72	13.45	4.34	1.83	21.21	2.44
494	AATTGTTAACAATTA	G196A,C278T,G346C,G414T,A451T,A513G,T643A,T697C	69.97	5.71	2.19	4.43	15.23	2.48
495	AATTTACCACTTGCA	A69T,G242T	59.01	8.2	5.05	1.44	24.59	1.71
496	AATTTACGCCCGGTG	A156G,G192T,A232G,T660C	69.13	5.99	3.45	3	16.48	1.95
497	AATTTGAAATATGCA	A181T,A334G,T605C	55.68	10.23	4.17	0	27.65	2.28
498	AATTTGACAAATAGG	G109A,T115C,C403T	61.02	6.19	3.97	1.07	23.31	4.45
499	AATTTGGGTACACTC	T74A,G381T,C627T,T643C	52.22	3.9	4.97	1.74	13.56	23.62
500	AATTTGGGTGTGGAT	A82T,T440C	67.52	8.97	2.81	3.3	15.63	1.78
501	AATTTTAGGCGCGTA	T48A,G112A,A156G,G381T,T516C,G531A,G554A	2.27	0.28	0.06	4.36	22.27	70.76
502	AATTTTATTCATAAC	C34A,A226T,T446C,T643C	0.32	87.89	0.08	0.24	10.34	1.12
503	AATTTTCATGGATTT	T390C	72.79	3.21	3.89	2.23	16.42	1.46
504	AATTTTCCTTTATCT	WT	55.93	12.3	4.61	1.92	23.1	2.13
505	AATTTTCGTGTTGGG	G676T	61.23	6.57	2.63	1.71	25.36	2.5
506	AATTTTTAACAACAA	A383T,C546T	33.92	19.82	2.2	3.08	33.48	7.49
507	ACAAAATGAGTGTTG	A166T,G387T,G585T,C612A	49.46	10.02	4.51	1.8	29.88	4.32
508	ACAAACGTATATAGC	G106A,C154G,T701A	55.11	11.75	4.79	2.27	24.27	1.8
509	ACAAAGCTTTCCATC	A365T,T509A,G575A,A590G	46.57	24.4	3.83	1.11	18.66	5.43
510	ACAAATAATTGCTGA	G32A,A160T,C393A,T401C,A473T,C518T,T550A	55.49	14.42	3.08	1.84	23.92	1.25
511	ACAACATAATGAATT	AC59A,C143A,AC147A	62.32	12.41	3.24	1.88	17.54	2.62
512	ACAACATTCTGCCCT	C522T	59.51	14.56	4.11	2.15	17.6	2.07
513	ACAACCTGCAAAGCC	T394C,G629T,A641G	74.48	4.46	3.56	2.17	14.09	1.23
514	ACAACGTCTTTATTC	WT	60.32	12.42	3.59	1.5	19.5	2.67
515	ACAACTATATGACAT	G387T,G460T,C520A,G644T,C649T	32.63	28.82	1.68	2.35	30.73	3.8
516	ACAACTTTCAAAAGT	CA77C,G180A,A416T,A443G,A456T,G488A,C698T	2.94	80.56	0.19	0.57	15.09	0.65
517	ACAAGACAGTCCGTT	G378A	70.36	4.97	3.14	1.95	15.51	4.07
518	ACAAGACTGGCCACT	T102A,A182C,T308A,G340A,A356T,G579A,T704G	32.63	27.99	1.83	1.4	33.9	2.24
519	ACAAGAGATGTCTGG	T179A,T280A,G510A,A558T,T704A	14.52	57.26	2.42	0.4	22.98	2.42
520	ACAAGTCATCATTTA	WT	58.01	11.16	5.48	1.62	21.3	2.43
521	ACAAGTCTCTTCCGT	T74C,G183T,G297A,T329G,G452T,T601C,T613C,G639A	0.44	92.22	0.15	0.15	5.72	1.32
522	ACAAGTGAGGTTATT	C37A,G49A,C434T,C463G,G529A,T581A,C588T,A694G	46.16	4.41	0.88	5.56	34.62	8.36
523	ACAAGTTTATTAACG	C273A	70.63	4.22	2.86	3.03	17.04	2.22
524	ACAATACCAAAGGGT	C40A,T173C,C619A,C630A,T634C	52.85	16.7	7.78	0.69	19.45	2.53
525	ACAATATCTAGATTC	T469A	46.09	22.43	3.49	1.74	24.13	2.11
526	ACAATGTGAATAGAA	T249C,C512T	59.64	15.74	4.06	1.07	16.08	3.41
527	ACAATGTGCTATCCA	C144A,A188T,T289C,G353A,GC433G,C518T,G568A,T605A,G673T,G679A,G690A	56.33	7.86	0.41	5	29.29	1.12
528	ACACAATTACATAAC	T351A,C454T,A578T,A592G,T661A,G676T	63.87	2.61	1.9	5.93	24.98	0.7
529	ACACACCCAGTGAGC	C185T,A533C,C612T	NA	NA	NA	NA	NA	NA
530	ACACCATAATTCCTC	A483G	69.79	7.28	4.78	2.09	13.73	2.34
531	ACACCATTGGATCTT	T277A,T392A,C434T	38.25	16.31	4.31	1.26	21.54	18.31
532	ACACCCACGGACCGT	G97A,T465C,A533G,G559T,C662T	51.91	14.79	1.27	4.02	25.66	2.36
533	ACACCGTGAAATTCG	A166G,C482A	70.24	12.29	2.76	1.4	9.16	4.15
534	ACACCTGGGAATTAT	A88T,C121T,C703A	50.09	13	6.69	1.94	25.95	2.33
535	ACACGCATAGGTAAC	G172A,T581A,A663T,C703T	51.32	17.19	5.76	1.93	21.72	2.08
536	ACACGTAAAAATTGT	C344T,GC575G,G599A,T643A	60.21	9.91	1.62	4.19	21.15	2.93
537	ACACGTCAATCTATG	A368C,G426T,T701A	32.46	30.27	2.38	0.79	21.75	12.34
538	ACACTAACCGATAGT	G319A,A383C	63.84	8.32	4.3	2.85	19.41	1.28
539	ACAGAAACCAACCAG	C423T,C497A,C511T,A572C	50.91	29.16	3.3	0.94	11	4.69
540	ACAGAGACGTGAGAG	A65T,A385G,C450A	62.85	12.13	3.54	1.61	17.19	2.68
541	ACAGAGAGGTTATGG	T361A	51.23	21.1	3.6	1.55	19.99	2.52
542	ACAGAGGCTAAACAT	A220G,C320T,C324T,T429C	10.45	70.95	1.2	0.45	11.95	5.01
543	ACAGATATGCTACTT	WT	54.93	14.7	4.26	2.02	21.08	3.02
544	ACAGCAAGTGATATC	G377A	65.93	5.82	3.62	2.22	20.12	2.3
545	ACAGCACGAGGTTTG	A285G,A334G,A477G,T586C	45.89	29.42	3.97	1.16	15.85	3.7
546	ACAGCAGTGACTTAA	T195A,C261T,T469C,G686A	54.84	14.03	5.95	1.96	22.19	1.04
547	ACAGCTCATCAGATC	C157T,C437T,A533T,T660A	58.07	15.48	2.54	1.59	16.62	5.69
548	ACAGGATGCCTGAGG	A82G,G106A,C320T,GT388G,G479A,G599A,T634A,G651A,T688C	13.47	49.31	2.28	0.78	32.33	1.84
549	ACAGGGTGTGATTCA	AC59A	53.61	13.56	5.03	1.63	23.59	2.57
550	ACAGTAACGGCGTCA	T90C,T126A,T419A,G452A,G460T	60.13	14.57	3.43	2.37	18.45	1.05
551	ACAGTACTCTTTCTT	A296G	0.68	93.52	0	0	4.78	1.02
552	ACAGTCGTCATCGAT	T130C	69.77	10.51	2.4	1.74	13.25	2.33
553	ACAGTGACATGGCTT	C135T,T212C,G366A,T374C,T389C	8.47	8.47	7.2	0.85	72.89	2.11
554	ACAGTGGTAACAGAA	C399T,T439A,G529T	66.66	10.44	3.14	2.02	13.7	4.04
555	ACAGTTAATCCGAGT	A181T,GA245G,G387A	19.85	44.08	2	0.73	31.15	2.18
556	ACATAAACAAGCCGA	A105T,A166G,C197T	60.95	12.19	4.13	1.84	17.68	3.2
557	ACATAAATTATAATA	A88T,T130A,A371T,T392A	43.4	15.69	4.92	1.68	26.85	7.46
558	ACATAACCTAACACC	G75A,A232T	59.73	11.52	4.67	2.24	19.42	2.41
559	ACATAGGCAGCGGAA	C178G,C567T	61.19	8.21	1.49	2.99	23.13	2.99
560	ACATATAAGGCCATT	A202G,G228A	42.62	23.88	3.85	0.64	26.33	2.68
561	ACATATACAACTCTT	T432A,TG469T,T604A	57.98	3.19	3.91	3.67	28.16	3.09
562	ACATATGCGTGTCCA	WT	62.33	11.26	3.01	2.06	18.61	2.74
563	ACATATTTTTGGTTT	G104A,T289C,T498A	13.59	57.99	1.15	0.58	23.48	3.21
564	ACATCACTCGGGGTA	G574A	59.75	17.34	4.49	1.41	13.07	3.95
565	ACATCATGAGCAATT	T115C,C273T	65.77	8.28	3.96	1.81	18.19	1.99
566	ACATCCTACGCGAT	A118G,GC422G,G691A	NA	NA	NA	NA	NA	NA
567	ACATCTTAAGGAAAT	C64T,T361G,G387T,A533G,G664A	40.93	23.31	5.16	0.18	24.2	6.22
568	ACATCTTTACGTTAT	G310A,G647A,C700A	72.78	1.64	3.48	4.56	16.36	1.18
569	ACATGACAAATTCTC	C155G,CT603C	61.79	19.7	3.23	1.31	11.08	2.9
570	ACATGAGGTGTTCAT	C320G,A416G,C612A,T622A	2.53	76.86	0.18	0.24	17.48	2.71
571	ACATGATATACTTAT	A78T,C367CA,T634A,T650A	63.31	5.22	4.85	2.7	22.06	1.85
572	ACATGTTTGGCGTCT	A120G,G537C	60.91	12.54	3.23	1.33	19.13	2.86
573	ACATTAAGAACTTTG	C453T	52.78	16.81	4.1	2.05	21.88	2.38
574	ACATTAGGACGAAAA	C94T,A166G,T186C,A252G,A296G,T308A,T528A,C588T,A592T,C646T,T701G	2.21	22.57	1.32	1.32	53.55	19.02
575	ACATTATCAATGAGT	WT	58.89	13.54	3.54	1.42	19.69	2.92
576	ACATTCATGGACAAA	C28T,A171T,C519T,A641T,T643A	60.19	6.88	3.27	2.73	23.12	3.81
577	ACATTCGGTAAATC	WT	66.89	12.62	2.73	1.02	13.66	3.07
578	ACATTGCTCTAAGCG	T672A	58.01	14.6	5.17	1.81	17.38	3.03
579	ACCAAATAATAGCTG	G100T,G471A,A477T	29.79	32.3	2.26	1.34	33.14	1.17
580	ACCAATACTGCGGTT	A535T	54.58	7.16	3.24	3.69	29.42	1.9
581	ACCAATCATGCCCCT	G187A,G233T,G362A,C530G,T605C	30.2	8.71	1.69	9.27	41.01	9.13
582	ACCACAAATGTTCTT	A219G,A492G,A580T	56.11	7.76	2.82	3.46	25.35	4.49
583	ACCACGATACGCACG	G87T,A236G,A513G,T586A	52.14	18.02	5.73	1.35	16.59	6.16
584	ACCACGTAGAAGTAG	A160G	68.12	13.35	2.97	1.45	11	3.11
585	ACCACGTGTGGTCAA	WT	60.72	9.83	4.83	1.77	20.33	2.51
586	ACCACTCCGCTTTGG	A65T,T174C,A371T,G391A,C630T	40.02	28.54	4.92	0.91	23.06	2.55
587	ACCAGAATTAGCAAT	A101G,G180T	53.13	7.07	5.45	1.41	31.12	1.81
588	ACCAGATGTATGACC	WT	59.21	10.36	4.7	1.72	21.69	2.31
589	ACCAGTCACAGACAA	T509C	57.58	11.07	3.24	2.39	21.14	4.58
590	ACCAGTGCCTATGGT	WT	56.51	11.78	4.18	1.95	22.93	2.65
591	ACCAGTTAATACTTA	T401A,G584T	61.94	10.46	5.77	1.29	16.96	3.58
592	ACCATATTCATAAAG	T283C,T539C	49.42	12.35	9.08	1.14	24.35	3.65
593	ACCATCCGTTATTAC	A177G,AG443A	0.65	88.26	0.06	0.13	10.27	0.63
594	ACCATTAATGGTCTT	T162A,A451T	63.85	7.19	3.81	2.37	19.63	3.15
595	ACCATTGAATCAACC	T115C,G221C,T504C,T539C,A542G	2.15	1.61	0	10.76	66.13	19.35
596	ACCATTTTTTACGTA	WT	59.87	11.28	4.53	2.03	20.44	1.86
597	ACCCAATTTTAGGGG	A202G,A648T,A682T	57.26	11.87	5.21	1.7	21.9	2.05
598	ACCCAGACGTTATTT	WT	60.36	12.86	3.46	1.82	20.18	1.31
599	ACCCATAATACATTT	T48A,A285G,T289A,T390C,A485T,T528C,A560G,G563A,C596T,G679T	5.5	4.07	0	2.39	84.68	3.36
600	ACCCCACGCGAACCG	A101G,G445A,G448T	0.47	86.23	0	0.35	8.33	4.61
601	ACCCCCACCTCAGTC	G366A	56.43	18.6	2.78	1.26	17.53	3.4
602	ACCCCGCTGATAAGT	WT	62.91	10.29	3.34	2.23	19.29	1.93
603	ACCCGACAGTATGTT	C324T,C654A	44.87	24.64	3.86	1.38	22.17	3.07
604	ACCCGGCTAACTCAT	WT	23.06	2.9	47.09	0.87	25	1.08
605	ACCCGGTCGGTAGGC	AC141A,A296G,T621A,G686C	0.67	89.83	0.03	0.07	8.09	1.31
606	ACCCGGTCTCCGCTG	T86C,T374C,A685T	40.45	33.58	3.74	0.87	18.85	2.49
607	ACCCGTAATTGCCAT	C148T,T195G,A251T,G359A,T604A,C665T	53.26	10.27	2.96	1.57	29.68	2.26
608	ACCCGTATTTCGGTT	A101G,T137A,T325C,C336T,G606A,T697G	49.14	26.28	1.49	2.67	14.64	5.78
609	ACCCGTCAGGGGTTA	T274C,G318T,G402T,A492G,TG536T	69.7	5.5	2.71	4.03	13.9	4.16
610	ACCCTATTATCTTCA	T74C,C94A,C403A,C627T,A663T	65.36	8.46	3.27	1.86	18.94	2.11
611	ACCCTCACGAGTAAA	C360T,A494G,C649T,G680A,T688A	39.08	23.88	3.75	1.64	28.37	3.28
612	ACCCTCAGATGTTCG	A443G	3.74	88.77	0.19	0.11	6.04	1.14
613	ACCCTCTTGATCAAA	G73A,T608C	64.54	11.26	3.01	1.4	17.27	2.51
614	ACCGATCGTCATGGA	A252G,T274C,C407T,T516C,G531A,G670T	46.14	35.17	0.95	1.51	12.57	3.67
615	ACCGCCTTAAGCGTC	T39C,G76T,C198T,G449A,G481T,A483T,G501A,C519T	3.8	50.14	0.28	0.69	29.69	15.4
616	ACCGGAATTTTATAT	A181T,A338G,A356G,G387A,G584T	0.57	89.29	0	0.07	6.76	3.3
617	ACCGGATTATCCTAT	G27A,C367T,T401A,C476G,T604A,T688A	49.81	13.57	4.37	1.18	25.91	5.16
618	ACCGGGACCAAAAGT	C511T	63.59	14.97	5.28	0.98	12.96	2.21
619	ACCGGTTGACAGGTA	A105G,C144T,A220C,G272A	77.6	2.3	4.74	4.25	9.89	1.21
620	ACCGTACAACATTAC	A219G,T354A,A462T,T516C,G537T,C627A	66.75	4.09	3.24	4.24	15.7	5.97
621	ACCGTGAACATATCC	A83G,T200A,T308C,A443T,C502T	22.63	68.6	0.78	0.62	6.91	0.46
622	ACCGTGATTTAATTT	G235A,T240A,C273G,C314A	31.02	34.01	3.72	1.25	27.13	2.88
623	ACCGTGCATTTATAA	T84C	54.65	13.77	4.35	2.01	22.7	2.53
624	ACCGTGTGTTGCCG	T42A,TA218T,C458T,A590T,C615T,T669A,T704G	67.09	10.32	1.95	1.49	17.55	1.61
625	ACCGTGTTACTATAC	G377A,A425C,T536C,TC586T	72.01	9.31	1.94	1.44	11.58	3.72
626	ACCGTTAGGGCGACG	G417T,T621C	68.42	9.94	3.13	1.66	15.07	1.77
627	ACCTACCTCTTTAAG	A594T,A682G	43.47	9.24	4.13	4.23	37.72	1.2
628	ACCTATATGAGAGAC	G234A,G264A,A475G,G488A	47.71	13.76	2.76	1.23	25.38	9.16
629	ACCTATCGTTTAAGC	G35T,TG50T,G58A,A69G,A83G,C144T,T195A	47.24	10.85	5	2.29	32.33	2.3
630	ACCTCAGCAAAGCAG	C93T,G346T,G380A,C454G	71.46	5.74	3.47	2.72	11.48	5.12
631	ACCTCAGGGGGAGAT	T38C,T218A,G227A,T241C,A416C,C521T,A560T,C600T,T688C	28.73	35.24	3.03	0.82	29.28	2.9
632	ACCTCGAATTGACCA	C146A,G306A,C369G,T401A,G460T,G537T,T632C,C684A	69.9	0.55	4.69	6.36	13.72	4.78
633	ACCTCGGCGGGACGC	G332A,T392C,G606A	80.04	0.46	2.84	7.15	8.97	0.54
634	ACCTCTAAGGGCCCA	A358G,C399A,C497G,T562C	4.86	66.87	0.61	0.61	23.4	3.65
635	ACCTCTATAATATTT	T116C	56.54	10.53	4.27	2.98	23.22	2.46
636	ACCTCTGACGGCTGG	G76T,A253T,G355A,T459C,C493A,T605C	45.13	31.7	2.54	1.24	17.51	1.89
637	ACCTCTGTTTCGAAA	C144T,T212A,A232G,C520T	2.08	1.66	18.26	0	76.35	1.65
638	ACCTCTTGGACATTC	C175G,T218A,G318T	66.67	7.14	5.1	1.7	18.03	1.36
639	ACCTCTTTGTCTACC	C77T,C143A,T539C	60.06	13.46	4.46	2.27	17.77	1.98
640	ACCTGAAAAAGGAAC	T392C,C551T,G639A,G686T,G690T	66.43	5.5	1.21	6.82	16.33	3.71
641	ACCTGGCAGCGTGAG	WT	60.36	11.51	3.54	1.66	20.56	2.36
642	ACCTGTCACCCGTGA	T115C,C404T	61.19	10.47	4.46	1.79	18.96	3.12
643	ACCTTATCCCGGGTT	T321C,T409C	71.77	5.08	3.87	1.87	15.33	2.08
644	ACCTTCACTGCCAGT	G387A,C684T	35.43	29.45	4.33	1.19	26.91	2.69
645	ACCTTGAAGTCTCAC	C94T,G187T,G233A,T446A,T605A,T625A	1.01	65.14	0	0.51	31.69	1.65
646	ACCTTTTATACGCAT	T291A,G297T,A368T,A483C,C515T,A592T	0.3	89.59	0	0.05	9.6	0.45
647	ACCTTTTCCAGAAGA	WT	60.49	11.31	4.12	1.77	20.05	2.27
648	ACCTTTTGCTCCCAT	G103T,G161C,T170C,C184T,G192T,T225C,C231A,A338T,C434T	56.41	15.6	3.21	2.75	10.55	11.47
649	ACGAACTCAGAAATC	AC147A,T632C,G651A	63.64	12.82	3.68	1.61	15.86	2.39
650	ACGAATAACAACTTA	G128A,A337G,A541T,T616A	60.11	3.27	2.53	3.75	23.15	7.18
651	ACGAATACCAGTCCA	WT	60.44	10.63	4.19	2.27	20.11	2.36
652	ACGACAATGAACTTC	T206A,T207A,G235A,T317C,C490T,G686A	69.26	6.4	3.68	3.01	16.18	1.47
653	ACGACAGGGTCGGGT	T50C,G56C,C155A,C176A,A226G,A263G,T267C,A282G,T321C,A492T,T601C,G639A	11.54	53.84	4.16	1.29	24.36	4.81
654	ACGACCATCCGGATA	C64T,G196A,T225C,A385T	53.4	21.24	3.39	1.43	18.54	2
655	ACGACCGGGAATGTT	WT	63.53	10.56	3.65	1.76	18.37	2.13
656	ACGACCGTTGAAACG	T42C,G128A,T291A,C339T,A416G,T465C,G555T	0.76	79.72	0	0.08	10.29	9.16
657	ACGACGTGGCAAGAG	C33T,T240C,G328C,A356G,G379A,C437T	41.93	24.49	3	1.19	18.45	10.94
658	ACGACTACTCTATTC	C155A,T247A,C396T,C415T	25.8	44.17	2.4	0.96	24.28	2.4
659	ACGACTCTCTAACAC	C143A,A323G	31.99	48.14	2.05	0.51	12.87	4.44
660	ACGAGACTGCTGGTG	A181G,C375T,T532A,G555T,T643C,T666C,A694C	41.17	4.9	0	12.74	36.28	4.9
661	ACGAGGGGTAAAAGG	T116C,T394A	52.06	16.8	4.4	1.59	22.72	2.42
662	ACGAGTTGATGCGGG	A65T,C77T,C185T,T280A,G656T	NA	NA	NA	NA	NA	NA
663	ACGATCGCCGACTGC	CA159C,T212C,G260A	25.95	5.66	8.49	0.33	55.4	4.17
664	ACGATGGGGGGTGCC	G72A,G87A,G99T,T347A,T528C,G686A	73.61	5.42	2.66	2.39	13.82	2.11
665	ACGATTCCACTTTCG	G112A,C158A,G223A,T225A,G276A,G402A,G568T,T613C,T616A	63.23	1.9	4.03	3.2	14.71	12.93
666	ACGATTCGATAATAA	T70C,A156G,C164T,G234A,G387A	19.83	53.25	2.41	0.85	21.95	1.7
667	ACGCAACAGGTAAAG	AG96A,G233A,T249C	49.39	21.89	2.98	0.99	21.27	3.47
668	ACGCACATTTTTGTT	G99T,C405T	71.29	6.01	3.17	0.83	14.86	3.84
669	ACGCAGCATTAAGGT	A236T,A338G,A416G,C571T,G626T,C654G	44.83	19.93	2.49	2.85	27.04	2.86
670	ACGCATCTAACCCAG	T173C,T696C	58.83	4.55	1.24	5.86	27.5	2.02
671	ACGCCATAGAAGATT	WT	59.59	11.65	4.13	2.11	20.25	2.26
672	ACGCGACGTAACCCA	T31A,T86A,T179A,A506C,C618T,C703G	1.45	32.36	0.21	7.26	51.03	7.68
673	ACGCGCTATAATATG	C376CG,G422T	40.4	29.68	3.61	1.26	21.23	3.81
674	ACGCGGGTGGAATTA	A506G,G657C	0.98	6.89	0.07	23.4	52.77	15.89
675	ACGCGTACTGGTGTC	G306T,T516C,A572T,C687T	76.6	1.35	2.9	4.45	12.77	1.93
676	ACGCGTCAACCCGTT	T504C,T655C,A682G,G690T	3.38	1.54	0	17.54	72.92	4.62
677	ACGCTCCAACCATGC	G391A,A425G	19.35	52.92	0.97	0.4	24.79	1.56
678	ACGCTGGGGGGGTGT	WT	60.02	13.2	3.92	2.34	17.8	2.73
679	ACGCTTGGGGAGAAT	C307T,C415T,A494G,C646T,A689G	5.74	76.55	0.15	0.68	15.64	1.23
680	ACGGACTAGAATAAG	C124T,T140C,C418G,C512T,CA571C,T604A,G651A,G690T	41.61	43.01	0.54	0.71	5.13	8.99
681	ACGGATTTATCTTCA	T621C	65.97	11.09	3.45	0.76	16.44	2.29
682	ACGGATTTCCTGCTG	A147T,T200C,G381T,G417A,GC452G,T469A,A474G,G480C,G538A,G555A,C600A,T666A	14.17	13.2	1.03	1.37	19.55	50.68
683	ACGGATTTTCATCAG	G311T,T351C,C467G	45.5	25.5	1.85	4.92	20.7	1.52
684	ACGGCCCCCAAGACG	T459C,C687T,G690A	45.46	3.46	1.3	7.79	40.69	1.3
685	ACGGCCGTCTGATAA	WT	57.8	11.69	4.38	1.55	22.36	2.21
686	ACGGCTACAACATAT	G80T,A199G,C400T,G647C	59.11	7.19	1.03	6.64	23.28	2.74
687	ACGGGCGATCTTGTA	T283C,C603G,A689T	53.4	13.74	5.26	1.46	21.64	4.5
688	ACGGGGCGTGGGTCC	T200C,A356T,T432C	65.41	9.65	3.8	1.66	16.68	2.79
689	ACGGGTTCCGACGTC	A177G,T277A,C307T,A358G	0.56	87.58	0.15	0	9.32	2.39
690	ACGGTCATAGAACGC	WT	59.73	11.1	3.88	2	20.01	3.27
691	ACGGTCGTTAAACCT	C463T,T632C	58.85	10.35	4.37	1.61	22.75	2.07
692	ACGGTGATATGGAAA	A385G	58.36	12.37	4.91	1.9	20.41	2.05
693	ACGGTTTTAGGCAAG	T70C,G328C,A383T,C503A	30.06	6.81	0.5	9.72	39.18	13.73
694	ACGTAAATTAGAAGA	WT	58.86	9.9	5.73	2.08	21.35	2.08
695	ACGTATCATAATCGT	G229A,T543C,T608C	40.52	26.86	4.85	1	22.86	3.9
696	ACGTCAAATTAGTTT	T277C,T465A,T545C	45.45	18.64	6.04	2.01	24.37	3.49
697	ACGTCAGGTTGTTAT	G73C,TG102T,A220G,CG376C,T389A,T420C,T446C,A447T,T543C	0.43	87.76	0.02	0.18	8.08	3.52
698	ACGTCCAGCCCAGTA	A82G,T207C,T374G,C615A,C624G,C703A	43.99	7.49	4.53	3.63	36.73	3.64
699	ACGTCCAGGTCAATA	A45T	61.35	12.14	4.12	1.58	18.52	2.29
700	ACGTCTAAGTAGCTT	C159A,A282T,G352A,G445A,T498A,T638G,G690A	0.79	74.4	0	0.3	23.71	0.8
701	ACGTCTCGAAGTTTC	A252G,G370A,G448T,A474G	26.83	27.66	1.69	0.93	17.37	25.52
702	ACGTCTCTAGGATTT	C159G,A214T,G242T,T351A	72.56	1.78	2.98	2.71	18.1	1.86
703	ACGTCTTAATAAGTG	T249A,G381T,A523T,C567T	1.56	0.49	0.16	7.46	27.3	63.03
704	ACGTGAGCACGGGTA	G215A,G607A	44.92	5.54	5.23	1.54	40	2.77
705	ACGTGGTAGCCGCTT	WT	60.89	11	3.75	1.5	19.95	2.91
706	ACGTGGTGAGCGATA	G342T,T347C	68.71	6.71	2.77	2.03	17.63	2.14
707	ACGTGTCAGCACTGT	T29C,G80C,T293A	1.94	70.4	0.68	0.15	20.07	6.75
708	ACGTTATCATATATC	T115C,C345T,C400T,A425C,G566T	33.67	35.3	3.28	1.13	20.33	6.29
709	ACGTTATCTCTGGAC	T116A,C143T,T216A,A296G,A338G,C399T,T459A,A483T,T625C	0.22	89.03	0	0.06	9.26	1.43
710	ACGTTCTCATATATA	T137C,C273G,T704C	49.92	14.99	5.61	1.59	25.13	2.76
711	ACGTTCTTTGTGGTG	A78G,A337T,A371G,T386A,T459C,A541C,T543C,C615A,G645C	15.02	67.73	1.56	0.19	11.41	4.08
712	ACGTTGCGCAAGATA	AG188A,G702A	57.03	11.41	4.64	1.62	23.18	2.12
713	ACGTTGTGCTCGTTT	G76A,A323G,C400A,G444A,G481C,G484A,GC517G,C646A	1.5	35.84	0	0.81	55.6	6.25
714	ACGTTTAGTCCTAAT	G204T,G322A,A323G,G370A,A383T,A474G,T562C,A597G	4.52	73.45	0.73	0	13.56	7.74
715	ACGTTTGTCTAAGAA	T130A,T174C,T386C,G388C,T643C	62.65	9	4.81	2.27	18.63	2.63
716	ACGTTTGTGAGCCAT	T201A,G260C,C397A,A428G,C598T	39.4	35.83	1.03	1.24	21.93	0.56
717	ACTAAAAATACAGTA	C512T,G691A	18.7	0.27	0	13.55	66.94	0.54
718	ACTAAAAATGTGCGA	C121A,G441A,A443G,CA512C,C567T,C624T,G635T,G676T	5.56	42.19	0.08	0.92	49.72	1.53
719	ACTAAATTAATTTCT	A78T,T126A,A199G,A285G,T697A	33.21	26.81	4.51	1.66	32.26	1.55
720	ACTAACTTTCTTTTC	A181G,T195A,G319A,T347A,A365T,G395A,A425G,T548C,A558T,T608A,A694T	29.74	31.79	0	5.64	27.18	5.65
721	ACTAAGGCTGTTCA	WT	63.65	15.59	3.03	1.51	12.78	3.44
722	ACTAAGTATTTACGT	A194T,T207C,AG220A,C261T,T280A,G355T,C450A,A473T,C630T	1.8	72.2	0	0	24.66	1.35
723	ACTAATAATTCTGTC	G444A,GC452G	1.04	84.36	0.05	0.12	13.44	0.99
724	ACTAATATAATTATG	T354A,G593A,A641T	79.92	5.37	2.43	2.24	7.92	2.11
725	ACTAATGTGACCATA	T126C,T137G,A301G,A337T,G352A,T394G,C602T	56.81	16.21	4.39	1.76	19.35	1.47
726	ACTAATTATACTGTT	C139T,C339T,G531A	13.15	51.12	1.86	0.74	30.03	3.1
727	ACTAATTTCTTTTTT	T31A,G244A	55.19	8.75	4.43	1.87	28.59	1.17
728	ACTACACTTCCGTTT	G52A,A78G,G215A,T429C,C521A,G673T	62.09	8.23	5.24	0.49	23.19	0.75
729	ACTACATTAGTGTGT	T126C,A337T,C339T,T341C,G381A,A474G,G568T,TC586T	52.48	18.33	3.31	1.22	17.81	6.86
730	ACTACCTGTACAGAT	G258A,G271T,T308C,A371T,G426A,A483T,C497G,G574A,T669C,C700T	60.5	2.44	5.45	5.76	16.26	9.58
731	ACTACGGGCGTGACA	C62T,G359A,A648G	55.03	10.48	3.5	2.18	25.77	3.05
732	ACTACTCCCTCTTTA	G257T,C266A,T429C,A560C	64.9	2.65	10.69	2.25	17.34	2.17
733	ACTACTTAGGATCGT	C231T,A268G,A383G,T638C	59.78	3.25	9.08	2.92	23.46	1.52
734	ACTACTTGCGCTATG	A44T,A263T	53.51	10.34	5.24	1.73	26.61	2.58
735	ACTAGAATAGGATTA	G350A,A443T,T509C	49.14	18.85	1	5.09	23.61	2.31
736	ACTAGCTCTTAACCA	WT	63.49	14.62	2.95	1.71	14.32	2.91
737	ACTAGGACCAGGAAT	GC517G	38.21	4.54	0.65	10.15	39.94	6.51
738	ACTAGGAGATGCCTG	C336T,G378A,T465A	20.07	37.68	3.52	1.06	30.99	6.68
739	ACTAGTACGTTCGAT	T136A,T621C	65.66	10.14	2.78	2.42	16.42	2.59
740	ACTAGTTGAAATAAA	A358G,C364G,T390C,T539A	4.08	71.2	1.63	0.54	22.01	0.54
741	ACTATACGGCATCGA	C369T	42.83	26.93	3.23	1.76	22.15	3.11
742	ACTATCGTACTTTTT	T46G,C54T	60.81	12.55	3.35	2.38	18.91	1.99
743	ACTATGCTACAAATC	T293C,T553C,G575A	62.6	10.54	5.69	1.43	16.89	2.84
744	ACTATGGTAGTTCGA	WT	57.12	12.63	4.17	1.79	21.39	2.89
745	ACTATGTATTCTTTC	G378A,A462T	67.93	4.41	4.77	1.75	18.29	2.84
746	ACTATTCACCCCTTC	G32A,C157G,G606A,T632A,G644A,T697C	44.03	5.72	1.2	8.83	38.06	2.15
747	ACTATTCAGTCTAAG	T267C,C269T,A296G,G297A,C437T,C587T	0.61	79.26	0.08	0.11	17.91	2.03
748	ACTATTTATTGCTCG	A236G,G593T	57.62	9.28	4.17	3.21	22.86	2.86
749	ACTATTTCGATTTGT	T270A,A285G,A578G,T643C,T688C	45	30.81	2.34	1.18	17.23	3.45
750	ACTATTTTATCGAGA	C60T,AC147A,G204T,C307A,T509C,A523T,T548C,T634C,C665A	0.6	0.46	0	7.59	29.53	61.82
751	ACTCAAATTATGTAG	G75A,C652T,G680A	55.84	10.36	3.88	2.1	25.57	2.25
752	ACTCACGAGTAAACA	G313A	32.51	33.88	3.36	0.92	26.6	2.73
753	ACTCAGGCATCAATA	G671A	55.21	11.99	4.59	1.45	24.71	2.04
754	ACTCAGTAGTTTGTC	T70C,A194G,A214T,T631C	61.76	6.82	3.55	1.48	24.01	2.38
755	ACTCATCCCGTAGGA	G81A,A578G,T669C	62.58	13.27	3.35	1.53	16.1	3.16
756	ACTCCCTGGTATACA	C164A,A252C	61.62	8.76	5.33	2.02	20.02	2.26
757	ACTCCGTTTTGCGCC	G52GT,T111C,T162C,C458G,G486A,T516A,C627T,G664A	2.26	1.51	0	12.45	69.07	14.71
758	ACTCGCGGTTTGATT	TC132T,A203T,T509C,T704C	54.24	13.33	3.33	2.32	22.73	4.04
759	ACTCGTAATTCGAAG	A214T,A356G,T631C,A681T	6.26	60.54	0.66	0.33	29.41	2.8
760	ACTCGTCGATGGTAA	G215A,G227A,T392C,G444T	0.65	75.44	0.16	0.16	21.16	2.42
761	ACTCGTTCGGACTTC	T317A,C404A,T553C	67.96	5.66	4.61	2.41	18.31	1.03
762	ACTCTAATCTCTTGA	T38A,G134A,AG220A,G378A,C490T	72.98	7.12	2.37	1.9	11.94	3.69
763	ACTCTACCGTGTTAC	T672A	52.93	14.71	4.51	1.8	24.22	1.84
764	ACTCTATATCTTGAA	T162C,C307A,G349A,C515T,T669A	79.8	2.99	4.29	1.56	10.19	1.17
765	ACTCTATGATGGCTT	A166T,C168T,T206A,G294A,G379T,G417A,G433A,A447T,T613A,T634C	6.77	54.18	0.5	0.86	26.28	11.4
766	ACTCTCTAGCACGTT	C367A,T610C	59	6.31	2.54	3.05	27.47	1.62
767	ACTCTGCACAATTTT	T354C,C363T,T390C,A443T,C497T	17.11	52.13	0.49	2.47	24.84	2.96
768	ACTCTGGAAAAGTCT	WT	57.46	11.44	4.7	1.94	22.03	2.41
769	ACTCTGGTCTTTTTA	G71A,T174C,A365G,T459C	50	12.23	3.72	3.19	29.26	1.6
770	ACTCTTCAATACTAG	A181G,C396T,T516C,A685T	51.14	7.56	3.34	3.87	29	5.09
771	ACTGAAGTACAACAA	C94T,A101G,A188G,A338G,G495T,G564C,C571T,C646A	50.56	10.11	3.37	2.25	29.96	3.74
772	ACTGAAGTCGATTCT	G243A	57.83	10.52	3.13	1.74	24.52	2.25
773	ACTGACGTTGTATAG	C184T,C463T,C615G	67.55	11.57	2.98	1.86	12.69	3.36
774	ACTGATAATACGTAC	A44G,C615G	53.31	10.97	4.55	2.55	26.49	2.13
775	ACTGATGTAGCAAGG	G449T,A663C	7.96	64.75	0.78	0.68	23.79	2.05
776	ACTGATTTTGTCATT	AC141A,T704C	59.59	10.68	3.21	1.61	22.51	2.39
777	ACTGCAATCTGTGGA	A65T,G575A	59.97	14.66	4.52	1.38	15.18	4.29
778	ACTGCCAGTGTTAAC	G414A	57.85	19.29	1.98	1.26	14.46	5.16
779	ACTGCTACTATATAT	T136C,C184G,A296T,T335C,G372A,C527T,G537A	NA	NA	NA	NA	NA	NA
780	ACTGCTATCATACTG	A263G,T545A	55.89	13.57	4.54	1.53	21.97	2.5
781	ACTGCTTCTTCTATT	T643C	60.74	15.04	4.11	1.76	15.5	2.84
782	ACTGCTTTACAGGTA	T50C,T130C,A232G,T361A	56.62	18.05	3.51	1.57	17.68	2.56
783	ACTGGATCACACTTT	G239A,G555T,T638A	49.54	12.26	4.78	2.55	22.62	8.25
784	ACTGGATTATTCATC	T39C,T289C,C675A	8.21	59.28	0.36	0.36	27.85	3.94
785	ACTGGCATTATCAAC	WT	58.38	12.23	4.19	2.07	20.97	2.16
786	ACTGGCTTATTAAAA	G426A,G457T,T655C	53.71	11.47	3.45	1.93	23.35	6.08
787	ACTGGGCCAGCTACT	G79A,C143G	63.22	13.03	2.28	1.95	16.96	2.55
788	ACTGTAGTCAATTGA	A47G,C124G,A473T,G488C,C675G	41.88	9.85	2.02	4.37	39.76	2.12
789	ACTGTCGTAATATGA	A26G,T29A,G310T,T361C,T516C,C520T,G599A	64.04	1.84	5.71	3.93	22.5	1.97
790	ACTGTGACTTATCGT	C615A	55.39	12.02	4.08	2.44	23.77	2.29
791	ACTGTGCATGTGAGA	T84C,TG308T,A547T,T621C	71.16	2.32	2.91	5.6	14.59	3.42
792	ACTGTTAATGTTTGT	A152G,T419A	64.74	9.58	4.35	2.18	17.95	1.2
793	ACTGTTCTAGCTGGT	G68C,T308C,G332A,T351A,C400T,A592T	83.85	0.31	2.08	6.29	3.66	3.8
794	ACTTAAAAAAGCAAT	T130A	57.18	11.16	4.48	2.24	22.46	2.48
795	ACTTAAAATATATGC	T216C,A282G,T317C,G319C,T394A,G479T,G585C	4.44	43.91	1.97	0.16	43.26	6.25
796	ACTTAATTTCTATTA	T42C,G264A,G430A,G651A	39.85	23.31	3.38	3.01	29.32	1.13
797	ACTTACAGGGAGAAA	G163C,C397A,A477T,C552T	51.96	2.4	2.92	4.15	29.84	8.73
798	ACTTAGCGATCCTAT	G72A,C77T,T137A,G271A,C345T,T354A,A572T	67.96	2.12	3.19	6.37	18.93	1.43
799	ACTTAGGGGTAGCTT	A160T,G245A,T390A,G563A	41.39	12.78	2.14	2.3	40	1.38
800	ACTTAGTCGCGCCTC	G66T,C178A,G330A,T545C,T616C	62.94	5.67	2.66	2.84	23.58	2.31
801	ACTTATACACCGTTC	T170C,T469C	58.28	15.38	3.78	1.29	19.18	2.09
802	ACTTATAGAGCCGAA	T283C,G484A	56.77	13.84	5.1	1.31	18.62	4.35
803	ACTTATCTGGCTTTT	G51A,A83G,C159T,T315C,G422A,G484T,T628A	57.61	2.38	3.74	3.28	27.16	5.83
804	ACTTATTGCTTCGCG	WT	59.11	12.35	4.47	1.82	19.06	3.19
805	ACTTCACAAAACAAG	WT	59.48	12.6	3.79	1.55	20.02	2.56
806	ACTTCCAGTTTCCCA	A338G,C437T,C654T,G676T	49.91	15.2	3.62	2.18	24.54	4.55
807	ACTTCGCTAGTGACA	C36T,T126A,G328A,A371T,A475G,A572T,G579A,G623A	52.84	13.76	4.96	2.75	23.3	2.39
808	ACTTCTCCATCCGAT	A236G,A323G,C482T,T672A	46.22	30.46	2.93	0.99	17.31	2.1
809	ACTTCTTTTCTAATC	C54T,C62T,T111G,A368T,TG605T	37.91	44.05	1.27	0.68	12.77	3.31
810	ACTTGCTACGATTAA	G189T,G294C,T335C,G402A,A425G,C490T,G683A	20.68	49.72	2.91	0.46	24.36	1.86
811	ACTTGCTACTCTAAG	T565C,C598T,C698A	56.11	10.61	3.88	2.41	24.52	2.48
812	ACTTGCTTAGGAAAA	T153C,T361C,T638A	41.26	15.61	4.61	1.85	33.92	2.75
813	ACTTGGAGAAGTCGA	T325G,GC362G,T401G,A416G,A462T,A483G,T539A,T650C	75.33	4.17	3.34	1.69	15.04	0.43
814	ACTTGTCATGTTCGG	WT	59.85	12.11	4.67	2.08	19.12	2.17
815	ACTTGTTAAATGATA	WT	55.48	12.15	4.33	2.44	22.7	2.9
816	ACTTTAAATGACAGT	A238G,T565G,T661A	47.77	3.01	0.4	16.23	31.02	1.58
817	ACTTTACTAAATCGG	C344T	49.52	15.56	4.16	1.72	26.22	2.81
818	ACTTTACTTTAGCTC	T655C	54.58	12.1	5.28	1.8	24.22	2.01
819	ACTTTCATGGTAGCT	T102A,A167T,A199T,T274G,A285G,A506T,G507A,G673A	2.65	55.63	0	3.15	34.27	4.31
820	ACTTTCCTAGACCGT	G32T,A105G,C178A,C411T	71.56	2.34	3.4	1.06	18.68	2.96
821	ACTTTGAGCGTATTT	T90C,T130G,G359A	53.42	19.9	3.42	1.33	18.88	3.06
822	ACTTTGTTAAAGTGG	A45G,G189T,G481A	37.06	24.6	2.88	0.64	26.84	7.99
823	ACTTTTTTTTCTCAG	G106A,A147G,C687G	55.31	13.47	2.72	1.68	24.87	1.94
824	AGAAAATACATCCGT	C129G,C611G,A667G	64.05	8.26	3.73	2.03	19.94	1.99
825	AGAAACAACTCTTTC	T84A,A338T,C637T	61.18	9.67	3.63	2.03	21.39	2.09
826	AGAAACAGTCAGAAA	C33T,A358G,T509C,A572T,T581C,C665T	3.01	78.95	0.42	0.31	11.8	5.51
827	AGAAACTCGTGACCG	T102A,C415A,G574C	72.02	7.56	5.27	1.09	12.59	1.46
828	AGAAAGATCTCATGA	GA56G,TG70T,A648G	65.98	6.32	2.65	2.85	19.92	2.28
829	AGAACAAAGGCGGTC	C93T,G95A,T137C,A256G,T622A	65.16	5.59	5.39	1.53	19.51	2.83
830	AGAACCTTTCTCCTC	G109C,AC147A,A177G,C307G,G525A,C703A	5.45	48.06	0	0.77	35.31	10.41
831	AGAACGAAGGTTTGG	T115C,A156G,A177G,G452A,T539C	67.18	8.95	3.7	1.44	16.47	2.27
832	AGAACTGAAGGATTT	WT	60.59	10.83	3.96	1.44	20.54	2.64
833	AGAACTTAATATTAC	A65G,A542T	50.82	10.3	3.93	2.73	26.52	5.71
834	AGAACTTGGCGCGGT	WT	63.38	9.58	3.34	1.63	19.71	2.36
835	AGAAGCATGCATTGA	G190A,T361A,T390C,G517C,T628C	72.84	9.46	5.51	1.05	10.47	0.66
836	AGAAGTGAATTACCA	G73A,T108C,G318T,A408T,C511G,A689T	61.17	5.95	1.73	5.8	18.25	7.1
837	AGAATAAACATATGT	A383G,G656A	60.44	8.57	3.48	2.37	24.06	1.08
838	AGAATACATTCAGAT	C139T,T351A,T413C,A492G,TC550T,C649G	74.99	2.19	1.48	5.28	11.32	4.75
839	AGAATATGCAGATTC	A82T,G95A,TG562T,G569A,T625A	59.25	10.97	4.08	3.13	21.32	1.25
840	AGAATCACAAAGCTC	T308A,G574T	65.66	12.05	2.95	2.11	14.7	2.54
841	AGAATGAAGTTCCAA	G95A,T126A	62.17	11.51	3.95	0.66	20.72	0.99
842	AGAATGAGCCCCTCA	T132C,A191G,A236T,G257A,G309A,G328T,A365G,T621A	73.83	1.67	3.02	1.94	18.27	1.27
843	AGACACCAAAGTCA	T137A,G294A,T329A,C393A,A485T,A535T	78.64	5.5	1.68	2.2	9.43	2.55
844	AGACACGTAGCTTAA	CT412C,T601C	59.77	7.41	6.35	2.12	22.22	2.12
845	AGACATCGATGGATT	C266A,T291C,C295T,G350C,T632C,G664A	0.6	74.87	0.47	0.07	22.16	1.82
846	AGACATGGAGAGACA	G67A,T108A,C159T,C278T,C437T,G647A,A682T	66.22	6.93	2.13	3.4	17.5	3.82
847	AGACATGGCTTGTAC	G99A,C602T,A689T	64.27	17.18	2.24	1.55	11.2	3.57
848	AGACCGCTTATAGAT	T280A,G346A	17.05	46.28	3.91	0.23	28.22	4.32
849	AGACCGTAATACTTT	T240C,A299T,G422A	65.71	2.8	4.82	2.47	15.57	8.64
850	AGACGGATACCCGTG	T29G,T315C,C627G	65.82	5.4	3.64	2.76	21.11	1.27
851	AGACGTCTTATTCCC	C619T,A641G	67.67	11.63	2.69	1.52	13.52	2.98
852	AGACTATGATTTTTC	WT	58.67	11.43	4.48	1.8	21.26	2.35
853	AGACTATTAGGTTAT	C41A	55.23	12.92	4.93	1.38	23.54	2
854	AGACTCCTTTGACAT	C139A,T162C	61.58	13.71	3.03	2.01	16.95	2.72
855	AGACTCTATTTGTAT	T200C,T207C,G230A,C503G	18.69	4.18	0.6	9.35	59.63	7.55
856	AGACTTAATTTTCTT	T173C	57.43	10.43	4.57	1.66	23.54	2.37
857	AGACTTCCCGCTCCG	T386C,T526A	55.48	3.95	2.19	4.82	26.32	7.25
858	AGAGCACGGCCGTTG	T280C,T704A	16.03	41.12	2.96	1.14	33.11	5.64
859	AGAGCAGGTCATATT	G134A,T174A,T206C,C521T	68.3	9.82	3.57	0.45	15.84	2.01
860	AGAGCCCGCGCAGTC	T277C,G352A	NA	NA	NA	NA	NA	NA
861	AGAGCGGGGTGTGGG	A166G,C281T,G391A,A456T	44.37	30.99	3.2	1.73	17.73	1.96
862	AGAGCTAGACAGGCA	C158T,A167G,C406T,T420A,T586A	32.98	42.6	3.75	0.85	17.48	2.33
863	AGAGCTGAATTACTA	G66A,T274A,T280C	12.76	40.06	2.77	0.99	38.97	4.45
864	AGAGCTTTCAGGCGA	T186C,C450T,G563T	69.3	5.08	4.85	2.77	16.4	1.6
865	AGAGTAGTCGGCATG	T351A,GC395G	75.42	1.47	4.26	3.47	13.77	1.61
866	AGAGTATTCGCAACA	T70G	64.76	10.42	3.03	1.99	17.25	2.56
867	AGAGTGACCGGGCGC	A356T,CT468C,T548C,T638C	46.33	18.39	3.81	1.38	25	5.1
868	AGAGTGGGCATTCTA	A105G,G326A,G471A,T634A	31.5	27.5	2	1.75	33.49	3.76
869	AGAGTTCTCGGACTA	G233C	50.5	20.01	3.74	1.65	22.23	1.87
870	AGAGTTTAGAATTTT	A214G	48.34	9.37	5.67	1.11	33.17	2.34
871	AGAGTTTAGTGCGTT	C150A,C434T,C521A,C587A,C646T	66.79	8.41	3.36	2.07	16.3	3.08
872	AGAGTTTGAAACTCG	T186G,TG351T,G422T,G534T,A689T	64.83	1.05	4.17	6.51	21.35	2.09
873	AGATAATACACCTCC	T53C,A69G	61.66	10.78	5.43	1.19	19.24	1.7
874	AGATAATTAATCTGA	T39C,C154T,G163A,A338T,G448T,A483G,G487A,A547T,G566A,C588A	41.05	3.03	2.45	1.73	36.71	15.02
875	AGATACTCTTAGCCT	A194T,T283A,T325A,A371T	1.06	65.52	0.26	0.26	31.84	1.06
876	AGATACTTTTAAGTC	T270C,T420C,C423T,G595A	50.13	18.38	3.31	1.53	21.33	5.32
877	AGATAGCACGCAGCA	T111G,A694G	48.33	4.17	0.69	9.31	36.39	1.12
878	AGATAGCTTGTATGT	G52C,T557C	57.7	14.94	5.33	1.27	17.01	3.75
879	AGATAGTTCCGAATT	WT	58.58	12.95	3.82	2.04	20.19	2.42
880	AGATATACGATAAGA	G106A,C150A,A188T,C646T	55.97	6.06	2.15	4.39	29.98	1.44
881	AGATATATACGATAT	WT	63.43	11.1	3.7	1.95	17.58	2.25
882	AGATATCTATATAGG	WT	57.58	10.97	4.37	2.31	22.32	2.46
883	AGATCAAGGGAAAAG	T50C,A238G,G297T,C345A,T440A,A447G,C615T,A689T	0.54	93.32	0	0.06	5.9	0.18
884	AGATCCTGAGTTTCC	A285G,T650C	43.94	17.01	1.73	2.31	32.21	2.79
885	AGATCTATAGATTCC	G109A,C398T	71.16	3.88	2.91	1.58	17.82	2.65
886	AGATCTCTAGCGTGA	T108C,C168T,A181G,T660A	63.92	6.33	1.72	1.53	22.66	3.83
887	AGATCTTGCCGTCTT	WT	68.36	8.47	3.15	1.48	15.66	2.87
888	AGATGAGGATTATCC	C129T,TG308T,T327A,C437T,G471T,TC601T,G606T	65.43	9.87	2.45	4.1	16.97	1.19
889	AGATGATTATTTTCT	G97A,C624T	61.88	11.84	3.51	1.41	17.95	3.42
890	AGATGGACCGCCTCA	A147G,T459C,G501T,G534T,C571T,T608C	60.01	9.23	2.31	1.07	25.69	1.7
891	AGATGGCTGATTAAA	G95A,C411T,A513G,C596A	65.96	4.33	4.61	2.32	18.35	4.42
892	AGATGGGTGTAAATC	G35A,G104A,T136A,C139T,A156C,C324T,T347A,A473G,A590G	61.96	12.67	4.03	1.96	16.93	2.44
893	AGATGTTACAGTCTG	A365G,T491C,T604A	64.09	11.11	2.98	2.1	14.33	5.39
894	AGATTAAAATCGTTA	G228A,A572G	44.2	20.2	3.12	2.23	28.35	1.89
895	AGATTAAACATATCA	G73A,A156T,G243A,G318A,A343G,T351A,A371G,C478A,G517GC,C552A,G593T,T628A,C703G	21.94	39.62	1.74	0.58	35.54	0.57
896	AGATTACGGATGCTC	G172T,C442T	14.49	65.81	1.64	0.82	15.99	1.24
897	AGATTCCAGGCGGTG	G73A,G691A	19.81	2.2	0.27	33.29	43.61	0.82
898	AGATTCGAAACTCTC	T650C	56.42	6.62	2.07	3.86	29.1	1.94
899	AGATTCTGCGCACTT	C231T,A365G,G524A	0.7	0.7	0	16.26	48.07	34.27
900	AGATTGAGAAATAA	T420A	26.13	57	1.18	1.04	12.93	1.72
901	AGATTGTTGTGTATA	WT	56.66	12.73	3.64	2.42	22.42	2.13
902	AGATTTAGTAACTGG	A101G,C588T,T650C	55.74	6.79	3.04	2.87	29.51	2.05
903	AGATTTATTTACAAC	G192T,C269T,A285G,G331T,T401C,A408T,C468A,C478T,T509G,C588A	14.5	1.12	0.74	12.45	60.4	10.79
904	AGATTTGACTGAACT	A191G,A202G,G258A	49.97	15.11	4.44	1.14	26.92	2.41
905	AGATTTGGTGCTTGC	T42C,T432A,A474T,T509A	67.43	2.32	4.03	4.17	18.99	3.06
906	AGATTTTACAGTGAT	T84C,G99A,A203T,C312T,T605A	39.05	27.62	2.32	2.72	23.81	4.49
907	AGATTTTGCGAGACA	G670C	60.38	11.7	4.03	2.07	19.37	2.46
908	AGATTTTGTAAGACC	C157T,A226G,G305T,C339T	52.99	21.25	3.84	1.96	16.43	3.52
909	AGATTTTTGTCAGCA	T174C,G555A,A580T	64.07	14.72	2.85	0.16	14.24	3.97
910	AGCAAAAGCCCACAC	A59G,A78G,A188G,G331T,A371T,G379T,T498C	65.5	1.25	2.76	4.53	22.78	3.18
911	AGCAAGCAATAGTGC	TG669T	61.18	19.55	2.59	0.91	12.18	3.6
912	AGCAAGGTATGACTC	WT	60.34	11.93	4.65	1.49	19.48	2.11
913	AGCACAGTTAGACTG	A156G,T333C,A356T,A368G	70.23	5.4	4.23	2.36	15.56	2.22
914	AGCACCCTATCTCGC	A191G,T274C,G318A,C512T,T634A	55.46	15.68	3.36	1.68	21.29	2.53
915	AGCACGAATATAACT	T508A	58.25	11.1	3.75	1.85	20.9	4.15
916	AGCACTACGATATGA	G210A	51.58	7.43	3.86	2	31.43	3.71
917	AGCACTTTATAATAA	C468A,A590G,A653G	42.28	8.16	1.45	5.25	38.78	4.08
918	AGCAGAGACCCACAT	WT	57.28	12.69	4.33	2.05	21.16	2.48
919	AGCAGGTAACAGAAT	WT	61.69	11.84	3.75	2.5	18.29	1.93
920	AGCAGTTAGATTTGC	A78T,G366A,A609G	50.93	20	3.22	1.44	21.01	3.39
921	AGCAGTTCCTGTCTA	T122C,T419A,G636A	58.77	15.4	5.93	1.61	15.34	2.94
922	AGCATACTGAGAGCT	C261T,G426T	42.27	15.55	3.98	1.64	21.74	14.82
923	AGCATAGGGGTTATA	G72T,G112T,A120C,G271T,T274C,A542G	66.19	2.43	4.32	4.32	19.83	2.91
924	AGCATGACGTGTTAG	G103T,T241C,C307T,G387A,T440C,T631A,G644T,A681G	12.64	63.81	1.05	0.54	19.99	1.96
925	AGCATGAGCCGTCAT	WT	56.22	12.67	3.54	1.92	23.72	1.93
926	AGCATGCTTACGGGT	WT	60.42	13.27	3.85	1.41	18.4	2.65
927	AGCATGGCTGACCCC	G75A	62.37	11.43	3.28	1.77	18.63	2.5
928	AGCATGTCAATTCAC	T293A,C424G,G499A,C646T	1.84	45.61	0.61	0.18	38.71	13.06
929	AGCATTAAATCCACT	C92A,A425G	39.73	30.59	2.05	0.46	22.83	4.33
930	AGCCAAATCCATTAA	T625A	48.47	11.57	3.64	2.65	31.72	1.95
931	AGCCAAGAATTTTAA	T218C,C412A,C436A,G444A,T504C,A541T	2.31	3.21	0	2.18	89.59	2.71
932	AGCCAATAATGAGAA	C295T,T392C	41.04	32.65	3.64	1.12	19.42	2.13
933	AGCCAATTGTTAGAA	T31A,A483G,T565C	67.9	9.61	4.92	1.79	13.47	2.3
934	AGCCAGTGGTGGAAG	A101G,T131A,T655C	62.53	8.98	3.52	2.06	21.5	1.41
935	AGCCATAGACAAACT	T38G,G72A,C157T,C159A,G227T	67.72	10.14	3.22	2.02	14.71	2.19
936	AGCCATAGCAAGGTC	A152T,G471A	43.35	20.88	3.03	1.96	27.25	3.53
937	AGCCCGGGCGACAAC	C577T	56.02	5.35	3.15	4.18	29.77	1.54
938	AGCCCGTAAGTTATC	T280A,T347A,A358C	17.89	40.81	3.3	1.1	32.11	4.78
939	AGCCCTACACTCCGT	G313A	32.33	34.96	2.76	1.38	26.19	2.38
940	AGCCCTCTTAATCCG	A156T,G566A	59.64	10.55	3.74	1.81	21.97	2.29
941	AGCCGCACGTGTTAA	T293A,A385G,A477G,T660C	1.93	63.53	1.23	0.2	26.41	6.71
942	AGCCGCCTGATCAAG	G79T	62.76	11.21	3.85	2.03	17.67	2.49
943	AGCCGGCAAGTTTCA	C34T,A147C,T277C,G346T,T548A,G639A,G676T	55.52	13.17	4.27	1.16	21.53	4.36
944	AGCCGTTAAAGCCAA	C85G,G103A,T179A,A323C,C453T,T509C,A523T,G574A,G584T,G595A,C652T,A667T	0.63	0.54	0	4.11	25.56	69.17
945	AGCCGTTTACCAGGC	C135CT,A214T,G318T,T616G,T634A	62.38	2.64	4.95	1.98	25.41	2.65
946	AGCCTATTACATGAA	G259T,T274A,C497T,T516C,T672A	56.94	1.22	4.25	11.86	21.09	4.63
947	AGCCTCTGATCCTGA	G319A,G387T,G433A,T446C,C454A,A592G,G636C,T688A	0.55	80.88	0	0.28	17.46	0.83
948	AGCCTTCGCGTTTTG	A337T,G387A,C576T	32.1	31.14	3.17	0.95	30.41	2.23
949	AGCCTTTAAGCGCTC	A118G,C121A,A416G,C455T,C458T,T586A,G614A	57.59	15.52	3.95	1.66	19.82	1.46
950	AGCGAACTCTTTATA	WT	58.23	12.2	3.84	2.4	21.31	2.02
951	AGCGAATCGTCTTTA	WT	58.79	11.54	3.53	2.05	22.29	1.8
952	AGCGAGGGAAGCGTA	T86C,T280G,C286T,C336A,A416G,C596T	0.57	87.97	0.15	0.24	10.32	0.75
953	AGCGATAGTAGTATA	WT	57.74	13.36	4.13	2.22	20.53	2.02
954	AGCGATTATTCGGCG	G112T,T179C,T504C,G517A,T634A	4.74	0.86	0	12.5	65.95	15.94
955	AGCGATTCTAACCAT	G30A,T116A,C158A,T240A,G544A	54.77	9.95	4.98	1.88	26.22	2.21
956	AGCGCGAGGGGGGCC	T179A,A456T,A533T,G555A,A689G	62.6	17.87	4.1	1.13	12.21	2.09
957	AGCGCTTGGGAAGTA	TG70T,C273T	65.54	10.19	3.76	2.3	15.69	2.51
958	AGCGGCAGTGTGAAG	WT	62.15	10.88	3.85	1.51	19.27	2.34
959	AGCGGCGGGGGCAAG	WT	62.11	11.56	3.98	1.8	17.96	2.58
960	AGCGGGAATCGGAAC	A82T,G104A,T317A,A337G,CA442C	0.75	66.22	0.05	1.12	15.72	16.14
961	AGCGTATAAAGCGAT	G56A,A356T,C527T	49.08	11.39	4.03	3.01	30.45	2.03
962	AGCGTCATACAAATG	WT	59.3	12.27	3.86	2.13	20.34	2.08
963	AGCGTGTGGAGTAGC	WT	64.26	10.12	3.44	1.69	18.27	2.21
964	AGCGTTGCACTTTCG	T386C,C418T,C618T	57.09	21.32	3.85	1.08	14.7	1.96
965	AGCGTTTGATTATCT	T302C,T303C,A365T,A483G,G633C,C646T	84.25	1.48	3.65	2.86	6.42	1.34
966	AGCTACCTTGTATTA	C703T	54.24	9.38	4.91	2.46	26.56	2.45
967	AGCTACCTTTAGTTT	T162C,A416G	52.31	21.81	2.69	3.24	18.49	1.46
968	AGCTATACACGGTTC	T137C,C292A,C410T,CT603C	7.41	78	0.75	0.24	10.58	3.02
969	AGCTATACTACAAG	C63T,A252G	46.01	29.75	2.25	1.12	16.26	4.62
970	AGCTATATATCGTCT	T543C	56.07	17.81	5.37	1.08	16.56	3.11
971	AGCTCAAATTGCACT	G100C,G328A,G499T	51.03	11.86	3.12	2.37	28.36	3.26
972	AGCTCCCGTCTTCAC	T255C,C367T,G461A,A578G	35.09	45.33	2.78	0.83	13.65	2.32
973	AGCTCTGGTACTACT	C121T,T669A	57.34	11.24	3.68	2.5	22.99	2.23
974	AGCTGATGGATGTCT	T389C	72.45	4.38	4.49	1.89	15.61	1.18
975	AGCTGTGCGCCTCGA	A428G,T557A	20.48	63.38	2.11	0.58	12.38	1.07
976	AGCTGTTAATACTGT	G68A,G98C,G172A,C197T,T308A,T491C,T498C,G569A,T625A,C649T	57.92	9.56	2.77	3.12	20.65	5.97
977	AGCTGTTGCAACAAT	C62A,T401C,A408G	62.44	5.37	2.38	2.23	25.49	2.09
978	AGCTTAGTAAGCATC	A209T	53.4	11.06	3.79	1.28	27.7	2.76
979	AGCTTCTATAGCGTT	T116C,G391C,G452A,G510A	65.53	10.05	3.71	1.55	16.85	2.31
980	AGCTTCTGTGTACCA	G479T,T688A	39.28	18.71	2.37	1.98	33.66	4
981	AGGAAAGTTACTTCT	A368G,C454T	57.52	13.9	4.13	1.82	20.61	2.03
982	AGGAACGCATCATCG	A57G,T216C,C405A,A462G,C567G,G679T	36.33	1.52	0.69	8.42	52.48	0.56
983	AGGAATCACCTAGTC	T302C	64.14	5.89	4.01	4.72	19.1	2.13
984	AGGAATTTCCTTTTT	A358G	1.04	82.35	0	0	15.22	1.39
985	AGGACAGATGTACAA	C33T,T516A	9.03	2.43	0.44	15.19	53.09	19.82
986	AGGACGGCATATCAG	T625C	62.99	9.65	3.13	1.85	20.3	2.07
987	AGGACTGGGGTCATT	A425T,C514T,A523T,G531T,T539A,A547G	0.75	0.29	0	5.16	10.33	83.47
988	AGGACTTAATAGAAT	T136A,T699C	57.57	11.14	4.39	2.08	22.64	2.17
989	AGGAGACGTGGGCGA	A533T,T625C	63.35	12.44	3.8	1.68	15.29	3.43
990	AGGAGCCACCCTCCA	A203G,G378A,G569C,C668A	70.17	3.28	4.35	1.87	18.14	2.18
991	AGGAGTGAATCCCTC	G112T,G245C,A296T,A365G,G488T,G617A,T631C,G644T,C652T,A681G	0.67	75.2	0.08	0.13	23.37	0.55
992	AGGATAGTATGCCTT	WT	59.12	9.33	4.67	1.11	24.67	1.1
993	AGGATATCCAAATAT	T74G,A358T,T605A,A682T,T697C	33.22	25.39	1.57	3.65	33.04	3.13
994	AGGATATTCCTGCCC	T302A,G332A,A365G,T491A	80.01	1.16	5.58	4.19	8.37	0.69
995	AGGATCCTGTATTAT	A166G,G540A,G617C	45.12	3.54	2.27	8.94	35.31	4.81
996	AGGATGTGGAGTCG	G76A,C406T,C450T,C512T	80.92	4.55	3.61	1.2	6.22	3.5
997	AGGATTATTATAGAC	WT	58.67	9.36	5.83	1.58	22.55	2.01
998	AGGATTCTAAGTTGT	A236G,T283C,TG459T,T550A,T643C,T660C	24.49	50.43	1.9	1.13	19.85	2.21
999	AGGATTGATGAAGTT	G387T,C423T,T432A	68.24	10.34	2.69	1.39	13.84	3.5
1000	AGGATTGATGATTTG	G163A,C602G	60.44	12.15	3.29	2.22	18.23	3.68
1001	AGGCATTCTTCGTCC	A238T,G297T,G444T	0.34	94.5	0.02	0.02	4.21	0.91
1002	AGGCCACCCATTCCT	C286G,G326A,G461A,T553A,T605C,A648T,T704C	14.01	56.48	1.27	0.21	25.9	2.12
1003	AGGCCAGGAGCAGGG	C453T,G629T	53.37	15.62	3.08	2.19	23.78	1.96
1004	AGGCCGATGGATGGG	C142T,C266A,C396G	52.88	10.79	10.68	0.31	22.93	2.41
1005	AGGCCTACTAGGTGG	T545A	56.67	11.43	4.76	1.42	23.65	2.07
1006	AGGCCTCTTTCACAA	C367T,A592C	47.18	25.29	4.33	1	18.17	4.03
1007	AGGCCTTTATGTCTT	T620C,A663T	60.02	11	2.42	2.21	21.85	2.49
1008	AGGCGGGAGAGGCGC	WT	63.11	11.79	3.93	1.92	17.56	1.69
1009	AGGCGTGAAATTAGT	T53C,C63T,T302A	54.28	13.91	5.88	2.14	21.66	2.14
1010	AGGCGTGACGCCCAT	A147G,A177T	55.44	10.67	3.11	1.89	25.78	3.11
1011	AGGCTAATCGAGTTC	T126C,G349A,G414C,A475G	75.88	0.93	4.33	4.57	12.53	1.75
1012	AGGCTACGGGGGTTC	WT	61.3	12.64	4.15	2.5	16.7	2.71
1013	AGGCTCTCGCATTTC	C164T,T317A,T394A,G575C	42.7	27.53	4.15	0.94	20.6	4.08
1014	AGGCTTTTTGAGTCA	C612A,T628A	52.81	10.53	3.57	3.39	27.07	2.64
1015	AGGGAAATAAAGTTA	G87A,T280C,C400G	11.92	34.56	5.19	0.56	44.8	2.97
1016	AGGGACTGTGCCTGG	A408G,G501T,C624A	68.68	9.95	5.13	1.33	13.75	1.15
1017	AGGGAGCGTGAGCGG	C164T,T255A,C615A,G657A	68.72	9.5	2.33	1.87	15.58	2
1018	AGGGATCCTTCATTC	T401A,A475G,A597G	63.35	8.06	3.79	2.13	18.8	3.87
1019	AGGGATGTCTTCAAA	A65T,C400T	63.75	9.64	3.79	1.36	17.69	3.75
1020	AGGGCAAACTAAGTG	T122A,T335C,G350A,T581C	83.64	0.61	3.66	2.37	8.35	1.37
1021	AGGGCGAATTAAAAT	T140C,T162C,G239C,T302C	62.26	5.9	3.82	3.36	22.45	2.21
1022	AGGGCGAGGAGCGAT	G73T,G89A	64.7	10.67	2.56	2.03	17.89	2.16
1023	AGGGCGTTAGGTTAT	T31A,A59G,A251T,A580T,T669C,C687T,T692C	4.29	0.95	0	15.71	78.09	0.96
1024	AGGGCTTTTACTATT	A338T,T374C,G635A	42.47	18.53	4.51	2.71	30.42	1.35
1025	AGGGGAGGGGCGGTG	C64A,G639A	60.4	12.77	3.66	2.16	17.72	3.3
1026	AGGGGGGGCGGGAGA	C158G,A338T,C642T,C649G	59.77	11.57	3.8	2.08	21.63	1.14
1027	AGGGGGTTCACTACC	G81A,T604G	63.83	7.8	2.75	3.3	20.09	2.23
1028	AGGGTAAAATCCACT	A167G,A301T,GC517G,C640G	29.36	2.29	0	14.22	50	4.13
1029	AGGGTATAGGATAAC	T153C,A191G,A203G,C454T,C478T,T634A,T643A,G673T	46.67	13.09	3.57	0.47	35.95	0.24
1030	AGGGTGCGTGATGGC	A572G	57.52	12.01	3.87	2.74	22.15	1.71
1031	AGGGTTACTTAATGC	C269T,T390C,A416T,C646T,T666C	60.42	0.98	1.67	13.23	23.3	0.4
1032	AGGGTTAGATTCTCA	C149T,T179A,T392C	56.27	13.29	4.72	1.86	22.22	1.63
1033	AGGGTTATTTTCGGT	TG498T	23.07	3.94	1.27	10.3	42.66	18.75
1034	AGGGTTCTTGTATTA	T283C,A365T,T545C,T638C	32.79	21.83	6.46	0.87	33.66	4.39
1035	AGGGTTTGGTATTGG	T270C,G297T,G377T,T440A	0.7	86.54	0.09	0.19	12.05	0.43
1036	AGGGTTTTAATTTGT	G284A,T308G	50.45	16.7	4.27	1.88	23.41	3.28
1037	AGGTAAGGCATTTAG	A78G,T179C,G350A,T409C,C567A	79.73	1.07	4.27	4.54	9.46	0.93
1038	AGGTAATGGTGCCAT	WT	59.38	11.03	4.05	1.95	20.86	2.74
1039	AGGTACTCATTGATA	C64A,C139T,A194G,T392A,C530T,T536A,T643G	41.67	3.47	2.78	5.56	40.28	6.25
1040	AGGTAGCGGTCATCA	T131C,C178T	59.4	11.34	3.58	2.39	20.6	2.7
1041	AGGTAGTCCGACCAT	A181T,T293C,T459A,T634A	56.17	11.78	5.1	1.27	24.2	1.48
1042	AGGTATTGGTTGGTG	G128C,A220G,G229A,T303A,G461T,T625C,G647A,A653T	47.31	17.33	2.63	2.26	28.86	1.6
1043	AGGTCAGAAGTATC	T321C	75.08	6.95	3.92	2.22	9.79	2.04
1044	AGGTCAGTGTCAGTC	G457A	64.92	8.28	3.32	2.76	19.33	1.38
1045	AGGTCATCACCGAAT	C397A	72.96	3.51	3.78	1.88	14.53	3.33
1046	AGGTCCATAACGCAG	A580T	61.9	8.45	3.53	2.47	21.68	1.96
1047	AGGTCTACTTGACAG	G332A,C458G,G651A	78.04	0.89	4.45	7.12	8.31	1.19
1048	AGGTCTTTCACTTTG	A220T,G499A	56.92	16.23	3.38	1.39	18.48	3.59
1049	AGGTGCCCGGCGTAC	T130C,C436T,T440A,G488T,G563A,T616A,T638C	44.3	4.56	0.98	6.84	36.16	7.17
1050	AGGTGCCTGCACTCA	T131C,T153C,C393T,C455CA,C587T	35.17	27.17	3.23	1.55	30.54	2.35
1051	AGGTGGAAAGCGCCA	A96T,A477G,G525A,G693A	51.68	4.17	3.67	4.63	30.45	5.39
1052	AGGTGGAGTAACAAA	G239A,T557C	57.37	13.16	5.43	0.96	17.57	5.5
1053	AGGTGGGTGATTACT	C41T,A256G,G538A,A578G	63.97	8.69	5.29	1.26	18.39	2.4
1054	AGGTGTATATGCGGT	C155T,AG232A,G319C,G350A,A408T	77.58	0.68	3.96	4.44	11.49	1.85
1055	AGGTTATACCTATGA	C63T,TG498T,T543C	27.17	7.31	2.19	4.92	39.18	19.23
1056	AGGTTATCTTAGAGA	T90C,T122C,C157A,G298A,G427T,T565A,G676A	2.28	80.96	0.15	0.18	12.37	4.05
1057	AGGTTATTGTTAGGA	T126C,G569T	58.51	13.16	5.36	1.88	18.83	2.25
1058	AGGTTCAGCACATCA	C630A	59.66	12.74	3.57	1.72	20.06	2.25
1059	AGGTTTTCCAACTTC	C92T,C398A,G525A	63.3	2.01	1.7	3.91	22.07	7.02
1060	AGGTTTTGAACTGTG	C157T,C404T	66.8	14.13	2.75	1.65	11.19	3.48
1061	AGGTTTTTACCTCCA	WT	55.63	9.83	4.56	0.72	25.18	4.08
1062	AGTAAACAATCACAA	A167G,A256G,C442A,T704A	73.39	3.97	4.58	2.32	14.36	1.38
1063	AGTAAACTTTTTAGA	G66A,G656A	61.26	9.3	3.43	2.48	21.38	2.14
1064	AGTAAAGGAATTTAT	G377A	64.42	4.6	4.91	2.07	21.74	2.26
1065	AGTAAAGTTTAATGA	A147G	56.86	10.74	4.52	1.75	23.69	2.43
1066	AGTAACCTTTTTCGC	T655C,C703T	57.84	11.49	4.72	1.75	21.72	2.47
1067	AGTAAGTGCACTATC	T302A,T361C,C423T,G480A,G529A,C552A	11.43	34.38	0.81	1.86	38	13.52
1068	AGTAATATATCAAGA	WT	57.45	9.51	5.38	2.12	23.54	1.99
1069	AGTAATCAGTGTGAT	G233A,C269T,G275C,G322A,T354A,C552A,C567T	53.52	7.15	3.03	2.39	33.04	0.87
1070	AGTAATGCCTAATTC	C415A	63.82	6.97	4.4	2.62	19.68	2.52
1071	AGTAATTAGCTGGAC	WT	57.37	10.81	4.44	1.15	23.93	2.3
1072	AGTACATTCTCAATT	T42A,G104A,A338C,G342A,A416G,G445C,T508C	0.68	88.68	0	0.08	9.79	0.77
1073	AGTACGACTGGTATA	T108G,A177G,C364G,G391A,G452A,G575A	51.09	25.66	3.73	1.53	15.13	2.86
1074	AGTACGGCAGATTTC	C489T	57.88	16.85	3.01	1.93	19.13	1.2
1075	AGTACGTTTTAATAA	T429A,A597G,T613A,T616C,T661C	64.28	13.55	1.46	2.13	16.6	1.98
1076	AGTACTATTGCTCGG	G417A	59.95	11.12	4.34	2.38	20.28	1.92
1077	AGTACTGCCGGACCT	T173C,A209T,C339T,A383G,A416G,T528C,G555A,T565C	10.81	67.89	1.52	0.32	18.17	1.28
1078	AGTACTTCTTTTATG	C307A,A425T,T608C,A663T	51.55	11.38	3.73	1.24	24.84	7.25
1079	AGTAGAATCATTTTA	C121T,G297T,G433A,T440A,G441A	0.65	85.76	0.04	0.09	13.14	0.32
1080	AGTAGCGCAGTGGTC	T283A,G318A,G427T	0.84	81.34	0.07	0.11	14.47	3.18
1081	AGTAGCGTCCATATA	A199T,G311A,GA355G,C497G,T509C,C511A,A592T,C642A	64.45	0.5	2.92	17.13	13.2	1.79
1082	AGTAGCGTGGGATGG	C36T	61.76	11.86	4.14	1.5	18.35	2.4
1083	AGTAGGAATAGCTAG	A96T,C278T,C345A,T394C,A438T,G487A,C646T	34.14	6.43	1.2	4.02	49.4	4.82
1084	AGTAGGTAGGCGAAT	WT	59.97	11.09	3.57	1.79	21.1	2.48
1085	AGTAGGTATCTTTT	C642A,T643A	66.32	12.3	1.87	1.47	14.97	3.07
1086	AGTATCAGTTCCTCG	G67A,A236G,A251G,C292A,C478T,T545C,G584A,A594T	9.11	73.5	1.08	0.15	13.22	2.93
1087	AGTATGATGGAGTCA	T186C,T429C,A513G	61.17	9.71	0.97	4.85	18.45	4.85
1088	AGTATGCATACTAAA	C165T,T277C,G487T	44.98	10.92	7.04	2.15	31.18	3.74
1089	AGTATGTACGTCATT	C121T,G229T	40.84	24.75	2.73	1.07	27.58	3.02
1090	AGTATGTGAGGTAAG	G230C,G271A,C400G,T638C,T661A	66.97	4.95	3.81	3.42	19.19	1.66
1091	AGTATTGTGTTGGAG	C149T,A191T,T341C,T361A,A475G,C527A,C662A,G683A,G686A	44.05	3.73	1.95	6.92	41.04	2.3
1092	AGTCAAAGAGCTTAT	A209C,TG308T,T545A,C570T	64.33	1.63	3.7	5.47	23.82	1.05
1093	AGTCAAATGCATTAG	A232G,C273A	75.85	4.2	2.7	3.06	13.06	1.12
1094	AGTCAACCTTTAACG	G196A,T605C	59.22	13.31	5.02	1.27	18.38	2.79
1095	AGTCAATATTTGGAA	C591T,A689G	59.86	9.81	3.23	2.84	21.59	2.68
1096	AGTCACGACTTTTTA	C157T,A337G,T401C,C405T	78.1	1.46	2.93	3.24	11.97	2.29
1097	AGTCACGTGATGATC	G311A	84.1	0.95	2.81	3.45	7.59	1.1
1098	AGTCATACAATTAAC	G123A,T516C	56.96	11.18	2.92	2.72	23.4	2.81
1099	AGTCATGACTTGTCA	T86A,C121G,C146T,A513T,G540T	48.86	7.7	3.97	4.45	34.18	0.84
1100	AGTCCCGGCCCACTT	C295T,A592T	45.63	30.05	3.16	0.73	16.54	3.89
1101	AGTCCGCAAGAACCT	G79A,TC409T,T621C	61	18.48	0.98	1.8	15.44	2.3
1102	AGTCCGTGGACGTCT	A83G,G372A,T491C,A494T,A523T,T628C	0.91	0.51	0	8.16	24.27	66.16
1103	AGTCCGTGTTTGTTT	T351A,T401A,T465A,G639A	77.39	1.63	4.32	2.49	10.94	3.24
1104	AGTCCTAATTGAATT	A177T,A246T,T669A	52.99	8.26	3.99	2.57	28.77	3.41
1105	AGTCCTGCACAACTC	C281T,T440C,G524T,A542G	1.6	0.84	0	12.61	24.46	60.48
1106	AGTCCTGTGCCACAA	A44T,A88T,A232T,TG274T,A385G,T409C,G430A,A475G	21.58	37.34	6.64	0.83	31.12	2.48
1107	AGTCCTTGGTCATAA	T308A,A648G	57.04	4.69	3.48	3.07	30.29	1.44
1108	AGTCGAGCAAGTAAA	G30A,T53C,G566A	56.84	9.74	5.22	1.74	24.12	2.34
1109	AGTCGCCCGGCAAAC	A147G,A181G,TA218T,G569A,A594C	48.24	19.21	3.65	1.97	23	3.93
1110	AGTCGGAGTGCCGAT	A462C	50.98	35.93	1.99	0.88	9.2	1.01
1111	AGTCGGGCTTCGATT	WT	61.93	10.89	3.78	1.31	19.85	2.24
1112	AGTCGTATTCATAAC	G104A,T179C,A226T,C312T,G626A,T631C,T650A	35.79	30.78	3.97	1.47	23.27	4.72
1113	AGTCGTCAAGGATCG	WT	64.39	9.81	3.84	1.5	17.42	3.04
1114	AGTCGTCAATAGTAT	WT	60.36	11.19	3.97	1.92	20.02	2.54
1115	AGTCGTTTATCTGTA	T102C,G260A	58.65	13.45	3.92	1.85	19.88	2.24
1116	AGTCTACTTACTTGA	G109T,A232T,T697C	56.27	8.3	4.3	2.6	27.35	1.18
1117	AGTCTATCATTTACT	T102C,T179C,T327C	75.04	1.52	4.5	3.63	13.89	1.41
1118	AGTCTATGTCTCACA	T300C,G387T,C423G,A541T,A594T	43.32	24.63	1.57	1.99	26.51	1.98
1119	AGTCTCACATCTTCA	C503T,G599A	50.08	7.66	1.91	6.8	28.25	5.3
1120	AGTCTCCTAAATTCA	T46C,A191G,G319A,A334G,A494T,T581A,G607C	63.75	5.03	2.99	4.18	21.53	2.51
1121	AGTCTGTCTTTTTTA	A451T,G480T	37.63	19.89	2.28	3.06	25.82	11.33
1122	AGTCTTATTTAAATG	C94T,GA250G,G304A,A447G,G461T,C589T,T704A	2.55	82.28	0.27	0.16	14.19	0.54
1123	AGTCTTCGTTCTTTT	G134T	67.96	8.96	3.13	1.83	15.5	2.62
1124	AGTGAACCTAGGTAA	C424A	34.66	31.77	2.67	0.87	23.74	6.29
1125	AGTGAATAATGTGAA	G510A	61.15	9.94	4.61	1.91	20	2.39
1126	AGTGAATATGACATC	A220G,T440A,G582A	40.52	5.92	1.86	3.81	47.33	0.56
1127	AGTGACCCGATCTTT	A578T,G690T	69.16	5.2	1.17	4.9	17.25	2.31
1128	AGTGACTTAACGCCC	G30A,A282G,A408G,G559A	8.89	39.26	1.94	0.4	46.12	3.39
1129	AGTGCCTAGGACAAA	T116A,T401C,T528A,C675T	50.31	3.39	3.09	4.83	36.42	1.96
1130	AGTGCTCGTCGGATC	T86C,G99C,A578G	56.94	15.1	5.72	2.07	17.11	3.07
1131	AGTGCTGATTTTTCT	A156T,A224T,G346A,G378A,A443G,T446C,A513G,G538C,T557C,A597G,C700A	0.34	83.64	0	0.26	7.57	8.19
1132	AGTGGACAAGACACG	T162A,A299T	72.73	5.15	5	2.91	12.12	2.09
1133	AGTGGGAGCGAAATG	G80T,G104A,G234T,C454T,T498A	38.57	46.7	1.69	0.98	9.55	2.51
1134	AGTGGGGTATTCTTA	WT	57.84	11.61	4.44	1.78	21.97	2.38
1135	AGTGGTACGGGACTG	AC59A,C133A,A203T,T291A,G331C,G350C,T351A,G366A,A408T,T420C,C577A,G645A,T655G	18.45	32.47	1.35	1.45	37	9.28
1136	AGTGTAACCCAAATA	WT	56.97	10.15	5.37	2.18	22.57	2.76
1137	AGTGTAACGAGATCT	T137C,A492G,G500T,C522T,G629T,T631C	67.96	14.59	2.98	0.77	10.94	2.76
1138	AGTGTACACCTTAAA	A88G,G342C,A343G,G349A,G355T,A368T,G426T,G460A,A494G	26.65	37.84	2.45	1.3	28.31	3.45
1139	AGTGTACCACCTTTC	WT	58.75	10.9	3.6	1.47	23.08	2.21
1140	AGTGTAGATCCTCGT	A246T,A282G	6.55	64.21	0.8	0.32	25.08	3.04
1141	AGTGTTTGCTGTGGT	T115A,T302C,T341A,G444T,C615G	0.99	87.3	0.03	0.36	10.68	0.64
1142	AGTTAACATCGTTTT	T650C	56.62	6.83	2.01	3.57	29.05	1.92
1143	AGTTAATACGGTCGA	A120T,G457T,T616C	63.54	8.83	3.36	2.34	20.19	1.73
1144	AGTTAGAATACGAAG	A160T,G346C,C624A	28.07	29.82	0.59	0.88	4.1	36.55
1145	AGTTAGATACAGTTT	G639A	58.13	14.99	4.87	1.38	17.34	3.28
1146	AGTTAGATGATCTTT	G319A,A590G	65.99	8.65	3.34	1.93	17.43	2.65
1147	AGTTAGGACTACAACG	A105G,T347C,A425G,T562C,G683T	56.88	18.9	3.19	1.29	17.45	2.29
1148	AGTTAGTACATGAAT	T31C,AC285A,T325A,G352C,G499A	41.88	9.04	5.11	1.55	39.32	3.1
1149	AGTTATCTGAGTTTC	G91A,A203T,C503A	25.3	4.62	2.43	10.95	46.72	9.97
1150	AGTTCACACAAAGTG	TG50T,T186C,A214T,G304A,C407T,AG494A,A648G	NA	NA	NA	NA	NA	NA
1151	AGTTCACTTTGAATA	C92T,AC156A,GC517G,A667G	35.07	2.66	0.69	8.08	46.59	6.91
1152	AGTTCATACCGCCTC	C55T,G66A,C424A,T498A	39.75	29.47	2.69	1.2	20.16	6.73
1153	AGTTCCACCTAATCT	C269T,T325A,G346T,T669C,C675T	61.5	6.6	3.82	2.16	23.43	2.48
1154	AGTTCCGTTGACTCT	T137A,G161T,T325A,C453T,A473T,G563C,C615T	50.47	19.24	1.72	1.41	25.82	1.33
1155	AGTTCGTCCCTAGGT	T218A,G245T,T267A,C320T,T325A,C521T,T562A,G664A	47.89	28.22	2.14	1.37	17.08	3.3
1156	AGTTCTATAGATTCC	T86C,T90A,G297A,G353A,C519T,C570T,A592T	0.76	29.64	0.33	0.22	66.62	2.42
1157	AGTTCTATGATGAAC	C114G,A385T,A609G	54.97	16.52	4.15	1.69	19.84	2.83
1158	AGTTCTATTTCATTT	G89A,T317C,C407T,A513G,C649T	64.07	5.46	3.12	3.81	20.45	3.09
1159	AGTTCTCGTTTTCAC	G342T,C434T,T625C	44.51	17.29	2.26	1.5	20	14.43
1160	AGTTCTGAAGATCAG	WT	58.22	14.04	4.06	1.18	18.95	3.55
1161	AGTTCTTATGAATCC	A416T	60.64	11.17	3.39	2.46	20.46	1.88
1162	AGTTGAATATAATTC	G80C,G366T	52.53	19.89	3.65	1.8	19.32	2.81
1163	AGTTGATGAATCGAC	T162C,A253G,GC433G,A590G,AG678A	59.11	26.08	1.26	0.99	9.62	2.94
1164	AGTTGCAAACAAGA	T39C,T610G,T650C,T655A,T704C	57.35	11.37	1.43	5.21	23.22	1.42
1165	AGTTGCATTGTGACT	C198T,C450T,G656A	73.51	4.18	3.5	2.39	14.93	1.49
1166	AGTTGCCTGGCCTTA	G537A	40.15	3.28	0.62	5.47	47.18	3.29
1167	AGTTGCTCTAAGATG	T201C,C598A	59.93	13.36	3.84	2.23	18.73	1.91
1168	AGTTGGTATCTACTG	G30A,G259A,C312T	37.32	26.99	3.34	1.48	28.1	2.76
1169	AGTTGTATACATTAG	C519T	53.69	8.31	3.95	2.91	27.37	3.77
1170	AGTTGTCGTGAAGAG	G340A,T351A,T389C	76.34	2.26	4.09	2.58	13.43	1.3
1171	AGTTTAAGAGAACAC	WT	59.31	12.58	4.28	1.06	19.69	3.08
1172	AGTTTAGATTTTGTC	G99A,T136C,C155A,C168T,T347C,T553C,G645A,A685C	72.33	6.52	4.78	1.83	11.82	2.72
1173	AGTTTATACACGGAT	A59G,T289C	12.14	62	1.3	0.14	21.1	3.31
1174	AGTTTCAGGTGTTTA	T545A,T557C,T632A	61.21	13.11	4.55	1.27	16.06	3.8
1175	AGTTTCATATAGAAT	G35A,G230C	45	13	4.88	1.88	32	3.24
1176	AGTTTCATTGCCCTC	WT	61.66	11.87	3.82	1.93	18.19	2.52
1177	AGTTTCGCTTTATCA	T162A,A513G	58	11.73	3.78	2.12	21.03	3.34
1178	AGTTTCTGTATTTG	T48A	59.19	16.65	3.65	1.82	15.28	3.4
1179	AGTTTGAGGGCTCGC	T509A	60.33	7.68	4.47	3.41	21.11	3
1180	AGTTTGGCAACCTCT	C157T,C424T	34.8	37.19	2.29	1.47	20.3	3.94
1181	AGTTTGGTAGCTGGA	C279A	58.08	12.62	5.2	1.83	19.58	2.68
1182	AGTTTGTCTACGTAT	G32A,T274C	60.17	11.89	3.44	1.67	20	2.83
1183	AGTTTGTGATTTTTA	G366A,G480T,A485G,C522T	36.38	42.62	3.29	1.22	14.77	1.71
1184	AGTTTTATATAACAC	T39A,T53C,G242A,T247A,G297A,C403T,T446C,T528C,T638A	0.22	79.34	0.22	0	18.65	1.56
1185	AGTTTTATTTTCGTC	T390C,T643C	76.41	4.14	4.97	2.48	10.35	1.65
1186	AGTTTTGTCTCTCAC	A88T,C150T,G234T,G651A	36.08	32.06	3.77	1.22	24.28	2.59
1187	ATAAAACAATGTAAC	WT	58.93	10.98	4.2	1.48	22.02	2.4
1188	ATAAAATATTGCTTG	C64T,C93T,G294C,A416G,A560T	42.55	20.51	3.27	2.04	30	1.63
1189	ATAAAATTCCAGAAT	G123A,T162C,G395C	61.06	7.34	4.85	2.75	21.46	2.53
1190	ATAAACTTTATGTTT	A232G	60.13	7.32	5.49	2.32	22.07	2.67
1191	ATAAAGCGACTAAAC	C151T,G350A,C412A,A447G,C618G,G651A,A689G	33.2	46.79	1.49	2.11	14.07	2.33
1192	ATAAAGGTATAACTT	WT	55.4	8.38	7.57	2.71	24.32	1.62
1193	ATAAATAACAAATAT	T162C,A301G	55.86	14.17	4.66	2.82	19.93	2.55
1194	ATAAATATGCAATTA	G391C,T420C,G444T	0.38	86.53	0.05	0.19	11.52	1.33
1195	ATAAATCATTTTGGT	T115C,G196A,A572G	63.41	8.7	3.61	3.08	19.01	2.19
1196	ATAAATGAGTTCATA	A209G,A263G,T321C,A689G	66.28	5.62	3.53	1.17	22.03	1.36
1197	ATAACAGAAAATTGT	A141T,A191G	57.43	8.86	4.14	1.38	25.61	2.57
1198	ATAACAGTATTGATT	A323T,T374A,A416T,C637T	49.39	17.07	2.89	1.89	26.36	2.4
1199	ATAACATAGGGCCC	C107T,G113C,T509A,A653G	64.74	6.41	0	6.41	19.88	2.57
1200	ATAACATCCGGGCG	A82T,A156C,A202T,T225C,T255A,C396T	73.91	8	1.94	1.9	11.71	2.54
1201	ATAACCGATGGTGTC	T327A,C360T,C367T,C552A,G664A,G691A	6.18	2.91	0.36	6.91	82.92	0.72
1202	ATAACCTGTTTGCCT	T419C,G585A	63.35	9.74	5.05	1.68	17.13	3.05
1203	ATAACCTTAAATCGT	A236T,T389C,T516A	1.45	0.91	0.18	22.86	55.9	18.69
1204	ATAACGCCACAAAAT	WT	57.99	11.34	4.87	1.74	21.15	2.9
1205	ATAACTACCCTCTTA	C345T	39.01	26.42	3.19	0.89	27.66	2.83
1206	ATAACTCTTATCTTA	WT	53.91	11.45	4.84	2.47	24.73	2.59
1207	ATAACTTGGAGACCA	A682T,T692C	14.14	2.25	0.41	17.83	64.54	0.82
1208	ATAACTTTAGGACTG	G127T,T132C,C149T,G331T,G471T	66.04	4.61	3.44	3.56	21.38	0.96
1209	ATAAGAACGACTCAG	A156G,C367T,G379T,T672A	62.41	6.6	4.55	1.98	16.24	8.22
1210	ATAAGCACTGATAAA	WT	60.05	10.27	4.84	1.89	20.83	2.12
1211	ATAAGCGTCACCGA	T173C,C646T	63.67	9.19	1.12	5.38	16.81	3.82
1212	ATAAGCGTGGTATCT	TG386T,A425G	35.97	32.83	2.11	0.78	25.7	2.6
1213	ATAAGGCGTCGTGTT	G563A	51.81	5.21	2.3	3.62	35.53	1.53
1214	ATAAGTCTTGATATC	C61T,G87A,C266G,A282G,G566A,T634A,C687T	1.48	58.46	2.82	0.55	31.58	5.11
1215	ATAAGTGGTGTGGA	T532C	61.85	19.97	2.96	1.03	9.33	4.87
1216	ATAAGTGTACGTGTA	G297C,C489T,A558T	0.71	90.05	0.03	0.03	8.93	0.25
1217	ATAATACGAATAATC	G106A,C155T,C248T,G629A,A685G	57.03	9.32	5.49	1.99	23.86	2.31
1218	ATAATATGAAAAAAT	TG270T,G377T,T394C,C418T,T660C,T688C	54.27	2.97	7.49	3.21	30.49	1.58
1219	ATAATCGCTAGTATA	G99A,C138T,GC395G,T440A	61.46	11.82	2.79	3.72	18.44	1.76
1220	ATAATGACACCTCCT	T661C	59.57	9.74	3.33	2.96	22.66	1.75
1221	ATAATGCGAATCGAA	T317C,C434A,G452A,C518G	31.86	0	0.98	29.41	24.51	13.23
1222	ATAATGGCGCGGTAT	T361A,G441A,TC586T	56.38	20.67	2.29	2.18	15.16	3.32
1223	ATAATTATACAGTCA	WT	54.43	9.64	4.76	1.8	26.85	2.52
1224	ATAATTCGTAATACT	WT	56.16	11.1	4.2	2.71	23.62	2.22
1225	ATAATTGCGAATAGG	T351A	72.55	2.74	3.93	3.41	15.4	1.97
1226	ATAATTTGAATAATT	G95A,A202G	54.99	10.71	4.76	1.35	26.03	2.15
1227	ATAATTTTTTACAGC	G43T,C146T,A181G,T207A,T218C,G569A,C577A,C665G	56.2	1.65	2.48	4.13	33.06	2.48
1228	ATACAAATAAAAATC	WT	58.43	10.24	4.86	2.24	22.02	2.2
1229	ATACAAATCCAAACT	T38G,C193T,T308C,G319A,A385G,A425T,G449T,C502T,T704C	50.41	34.56	3.01	1.3	8.05	2.67
1230	ATACAAATGGAACTC	A199T,G233C,T409G,T491C,T650A	51.88	11.99	3.32	2.45	26.73	3.64
1231	ATACAACAATCCTCA	A220G,C520G,T539C,T548A,G573T,GA677G	64.02	11.34	1.99	1.55	9.8	11.3
1232	ATACAAGCTAAGATG	G100T,C178T,C396T	60.94	5.96	2.65	1.99	21.19	7.27
1233	ATACAATATTATTTA	G113A,T409C,G524T,A541G	0.81	0.26	0.04	4.47	14.55	79.87
1234	ATACACAATCTCGTA	T302C,T325A,A443T,G629A,C652A	5.62	79.72	0.56	0.44	12.64	1.02
1235	ATACACTATACAAAC	G52A,C237T,G346A	65.11	8.72	1.91	2.98	18.09	3.19
1236	ATACACTTTAAAACT	G499A,G505T	49.46	10.8	3.35	3.03	30.38	2.98
1237	ATACATGGGTATATT	A160T,C360T,A558T,T616C,T620C	40.71	33.92	2.86	1.08	18.22	3.22
1238	ATACATTACTTGCTT	T137C,A523T	1.55	0.44	0.22	7.42	29.57	60.8
1239	ATACATTATCACCG	T413C,G629C,T631A	59.62	21.51	2.17	0.85	12.74	3.11
1240	ATACATTTCCATGAG	C512T	64.69	12.81	3.45	1.05	15.73	2.27
1241	ATACCACTCCTAGAG	C41A,G635T	59.7	11.94	5.71	1.35	18.88	2.42
1242	ATACCATTCCGTGGA	G58T,T122C,T179C,A209G,C344G	33.1	28.98	4.12	1.14	28.55	4.1
1243	ATACCCATATAATGA	C400T	60.68	12.72	3.47	1.16	20.23	1.74
1244	ATACCCATTGTCTG	TC39T,A282G	6.95	56.07	1.22	0.44	33.45	1.88
1245	ATACCTGTCTATGTG	C150T,G190A,A251T,C265T,C530T,A535T	39.61	5.52	3.25	4.87	45.78	0.96
1246	ATACGAAGACCATCT	C119T,A456T,G481A,T516C,G645A	34.91	31.61	2.22	2.22	18.83	10.2
1247	ATACGACGGCCACTT	A542T	53.01	10.82	3.81	2.18	23.32	6.85
1248	ATACGCAGCCTAAGA	WT	56.89	11.37	4.01	2.63	22.07	3.03
1249	ATACGTAATGTTATA	T179A,T241A,C273T,A358T,A368T,C376A,G377T,GC422G,A462T,G544A,T557C,T628A,C642T,A682T	17.35	51.69	0.36	1.06	21.77	7.78
1250	ATACGTGCTAGTATT	WT	58.64	10.93	3.4	1.88	22.48	2.68
1251	ATACGTTCAGGATGA	T283C,C400G,C415T,G644T	20.61	52.66	3.74	0.45	20.27	2.26
1252	ATACTATCGAAGTC	A220T,T329C,C442A	86.6	2.46	1.91	1.5	6.15	1.37
1253	ATACTCTTGTTCTTT	A438G,G574A	54.79	21.72	4.04	0.63	14.9	3.93
1254	ATACTGGGTTATACT	C61T,A105G,C185A,T247A,T317C,G381C,G564A,C567T,A678C	NA	NA	NA	NA	NA	NA
1255	ATACTTAATACATCA	T111A,C466A	24.82	45.41	1.71	0.71	25.84	1.51
1256	ATACTTCAGTTTTTA	WT	56.93	11.68	4.47	1.74	23.08	2.1
1257	ATACTTCCGGCAGGC	G233T,C393T,C589T	25.54	48.88	1.94	0.97	18.62	4.04
1258	ATACTTGATTAGAGT	G97A,C143A,T206C,G471C	39.08	31.13	2.45	1.8	22.06	3.48
1259	ATACTTTCCAGAGGT	A252T,G311A	81.47	1	3.9	3.4	8.7	1.52
1260	ATAGAAGCTCTAAAT	A194G,T581A	55.73	11.92	4.37	1.67	23.28	3.02
1261	ATAGAGACGTAGAAT	A285G	41.16	30.01	3.46	0.38	20.38	4.61
1262	ATAGAGCTCGAGTAG	G72A,T136C,T586C	57.91	14.85	4.18	1.87	18.02	3.17
1263	ATAGATATTCAGTTA	C155T	58.07	10.76	4.61	1.79	22.46	2.31
1264	ATAGCAATTCCACTG	C144T,A188T,C454T,TG459T,A663G	13.32	67.07	1.25	0.77	16.41	1.18
1265	ATAGCACCGTTTCTT	C266A,T516A	2.28	1	0.21	12.92	55.98	27.62
1266	ATAGCATGACGGTGG	G210C,C612T	55.98	4.97	2.28	2.15	32.49	2.13
1267	ATAGCATGATTTCGG	T86C,A203T,A513G	51.91	13.23	3.67	2.73	24.16	4.29
1268	ATAGCCAATAATTAT	C34T,C62T,T116G,T137C,A199T,C314T,C376A,G381T,C404T,C527T,A541C	31.03	13.82	2.74	2.09	42.9	7.43
1269	ATAGCCTGGGGACT	G319A,A572T,C611T,T658C,C684A	68.79	8.91	3.1	2.87	14.02	2.31
1270	ATAGCCTTATGTTCT	WT	56.27	12.98	3.13	2.09	22.74	2.78
1271	ATAGCGTGCATTTGG	WT	58.53	12.13	4.68	2.01	20.54	2.11
1272	ATAGCTCAAAGTTTT	G348A,A408C,A513G,A594G,G644T	43.18	1.19	2.82	6.59	30.13	16.1
1273	ATAGCTTCAACATGA	A438G,T440G,G561C,C637T,G683A	50.34	22.25	2.6	2.1	20.97	1.74
1274	ATAGGCAGACATTCT	T186A	56.1	13.46	3.11	2.07	22.57	2.7
1275	ATAGGCGTGCTCGCT	A83T	60.28	11.26	3.54	1.78	20.62	2.52
1276	ATAGGGTGTAGATTA	A492T	58.35	13.4	5	2.01	18.59	2.65
1277	ATAGGTAACTGTATA	WT	59.1	9.7	4.11	2.16	22.47	2.47
1278	ATAGGTGCCAAGCTC	G259A,C278T,T300C	NA	NA	NA	NA	NA	NA
1279	ATAGGTGTTTATCCG	G49A,T108A,C142G,T249C,C369G,A641G	57.44	17.5	4.28	1.42	16.65	2.71
1280	ATAGTAAGATTATCG	A118T,GC433G	54.27	13.07	7.03	2.01	21.61	2.01
1281	ATAGTACAGTTTTAC	C93A,T446C,C503T	0.91	65.15	0	0	27.58	6.36
1282	ATAGTACGGTGAACG	C94T,G264T,T308A,T354A,C404T,G471A,T638A	66.58	2.92	2.49	4.95	21.5	1.55
1283	ATAGTACTCCAATAA	G379A,C397A,C642A	82.73	0.3	4.19	3.59	8.3	0.89
1284	ATAGTAGATATAAGT	T111C,T137C,G229A	39.68	16.67	4.29	2.06	36.03	1.27
1285	ATAGTCCCGGGTTCG	C144T,G210C,T302A,T329A,C463T,T491A,C552A	69.77	3.31	2.52	1.6	20.42	2.38
1286	ATAGTCGGTTAAAAC	C571A	60.41	12.57	4.39	1.27	19.78	1.57
1287	ATAGTCTATTAACAG	C55T,G81A,C114T,A253T,G417A,G449A,A494G	10.24	71.88	0.82	0.76	13.27	3.02
1288	ATAGTGCACACTTCA	G104A,A199G,T200C,T701C	62.75	10.21	3.4	2.08	20.04	1.52
1289	ATAGTGGGGATAGTT	A45T,C55A,A105C,T321A,A408T,T562A,T613A,A663G	37.86	15.13	4.01	1.55	37.09	4.36
1290	ATAGTGGTCTATTTA	WT	57.63	10.76	4.18	1.73	23.92	1.77
1291	ATAGTGGTTTTAGAA	C265T,T608C	56.42	10.59	4.57	2.15	23.14	3.13
1292	ATAGTTTGTTGGCAC	C142T,C286T,A523G	1.23	0.37	0.25	14.99	43.36	39.8
1293	ATATAAACCAGAGCA	T115A,A253T,G313A,A371T,C400A	35.77	28.74	3.38	1.13	28.55	2.43
1294	ATATAAAGAATAACG	C591T,A681G	58.5	4.81	2.83	3.94	27.46	2.45
1295	ATATAACGGGCTTCC	A383G	62.8	9.38	4.71	2.66	18.81	1.64
1296	ATATAACTTGGCGAT	A44T,T108G,C139A,T308C	68.74	2.43	5.71	4.37	17.73	1.02
1297	ATATAATTACGTTGT	G271A	79.36	5.25	3.49	2.8	7.7	1.4
1298	ATATACACGGCATGT	C34T,T70G,A236T,A252G,T289C,C345T,G379T,A477T,G544A,C615T,G626A,T628C,A663T	15.22	20.99	0.83	0.83	57.2	4.94
1299	ATATACGCATTTATG	T29C,G243T,G484A,C497T	49.05	4.19	2.73	5.66	32.71	5.66
1300	ATATACGTAGCTCGA	WT	58.22	12.63	3.22	2.28	20.55	3.09
1301	ATATACTCACTTATC	WT	51.64	12.94	5.2	1.82	26.6	1.8
1302	ATATATGATCGAAAG	WT	59.63	12.22	3.52	2.07	20.08	2.49
1303	ATATATGATTCATCT	TG469T,A474T,T516C	40.05	15.33	2.38	3.67	31.96	6.61
1304	ATATATGGTTAAAAT	T621C	61.95	10.77	3.9	2.19	19.05	2.13
1305	ATATATTACGTGATA	G427C,C458T,A535G	58.75	10.54	5.13	1.98	21.55	2.05
1306	ATATATTGTGCAATG	WT	57.1	12.13	5.07	2	21.11	2.58
1307	ATATATTTTAACCTT	G76A,C478T	61.54	9.57	3.62	2.06	21.01	2.19
1308	ATATCAATCTACTTT	WT	53.34	13.33	5.25	1.41	25.26	1.41
1309	ATATCACGATTATTG	A156G	55.6	15.79	4.64	1.4	20.23	2.34
1310	ATATCATCTGCCCAT	A641G,A653G	16.7	1.54	0.22	20.22	60.44	0.88
1311	ATATCATTTACTCTT	T491A	57.41	10.21	2.87	1.59	25.68	2.23
1312	ATATCTCACCTAGAA	A78T,G349A,GC402G,A641G,T697C	79.91	1.07	3.39	3.33	10.56	1.73
1313	ATATCTCTGGTCCTT	A59G,C110T,G127T,A246G,A338G,C339T,T465A,C630T,T634C	2.49	83.65	0.47	0.08	11.29	2.02
1314	ATATCTGTGCGCTAT	G305A,C521T,A542G,G693A	72.38	1.36	3.08	5.43	15.58	2.17
1315	ATATCTTCGTCCTTA	A78T,C92T,A236T,T270C,C591T	67.59	6.79	1.69	2.67	20.18	1.08
1316	ATATCTTTTCGATGA	T216C,T293C,A416G	60.27	14.61	2.28	1.37	17.81	3.66
1317	ATATGAGCGTATTAA	T70C,A160C,A232T,G330A	59.3	5.22	4.87	2.06	27.27	1.27
1318	ATATGCCCATTTCTT	G30A,G99A,T186A,A213G,T390C,T413C,T429A,A689T	62.71	8.16	3.48	1.87	22.46	1.31
1319	ATATGCGTTTGATAT	G470T,T532C,C591G	46.22	14.6	3.2	1.55	23.34	11.1
1320	ATATGCTCATTTTTC	T39A,G313A,G568T	32.5	30.18	2.65	1.32	29.51	3.84
1321	ATATGGAAATCTATT	A166G,T303C,G359A,G644T,T697A	70.3	4.32	5.75	2.95	15.03	1.65
1322	ATATGGATCCTAATT	C464A,C618T	58.41	14.41	4.21	1.95	17.57	3.46
1323	ATATGGGTATGAAGA	C158A,G313A,G635A	35.81	27.59	2.37	1.08	30.37	2.78
1324	ATATGTGGCAACGTT	C154A,G391A,T509C,C615G,G617A	40.47	19.53	3.36	2.24	29.25	5.15
1325	ATATGTTCAAATTAT	A371T,G496C,G614A	47.89	13.08	2.69	1.93	29.42	4.99
1326	ATATGTTCTTTATGT	AC59A,A203G,T650A	45.37	9.62	3.32	1.6	38.6	1.48
1327	ATATTAAATTGTTAG	C92A,C455T,A506T,CT603C,C687G	1.55	68.9	0	4.3	23.37	1.89
1328	ATATTAAGCGCGGCC	C312A,A535T,T634A	53.9	10.36	3.18	3.03	27.69	1.84
1329	ATATTAGGTGTGTTT	AC59A,C567T	50.27	11.03	4.45	3.38	29.53	1.34
1330	ATATTCCTGAATACC	G471T	37.45	31.91	2.13	2.55	25.11	0.85
1331	ATATTCGTGTAATAT	T401A,GC402G,G414A,T692G,T704G	10.94	1.73	0.38	17.66	62	7.29
1332	ATATTCTCATGTCTC	T509C	56.41	11.45	3.61	2.15	22.41	3.97
1333	ATATTCTGCACTTGA	T162C,G348T,G537A	42.33	1.18	2.01	10.6	40.84	3.03
1334	ATATTGTAATTATTA	G79A,G89A,G163A,G234T,T302C,C435A,G441A,T655A	73.71	2.98	2.98	4.13	14.94	1.27
1335	ATATTTCCTGCGACA	A232T,G331A,T354A,C511T,C652T	85.89	0.51	3.04	2.41	6.62	1.52
1336	ATATTTCGAAGTACG	CT114C,T140A,T351C,T553C,T621A	70.09	5.62	4.14	1.73	16.01	2.4
1337	ATATTTGAAAATAGA	G106C,C412T,A653G,T666A	47.72	19.07	3.16	1.5	24.92	3.62
1338	ATATTTGGTAGTCCG	G76A,G123T,G318A	55.4	19.34	2.31	1.57	17.94	3.43
1339	ATATTTTTTCACAAG	A78G,T341C	72.63	3.63	3.93	2.14	15.7	1.98
1340	ATCAAAAACTGTACC	T38C,C55A,C320T,C406T	27.3	25.19	4.61	1.4	38.68	2.82
1341	ATCAAAATTTGGACC	C197T,C248T,C344T,T351C,T604A	57.4	8.01	5.34	2.37	24.46	2.42
1342	ATCAAAGCTCTTACC	WT	55.35	12.03	4	2.53	24.44	1.64
1343	ATCAAAGGACTTACA	A301G,G559T	56.39	7.66	2.55	2.34	24.47	6.59
1344	ATCAACAGTGAGTCT	T565C,C665A	59.5	13.44	3.25	2.04	18.92	2.84
1345	ATCAACGCTGTCGCC	A663T	60.93	10.1	3.71	1.82	20.19	3.25
1346	ATCAACTAAATTTAA	A232T,G636A,T655C,T669A	57.15	13.72	5.74	1.45	18.81	3.13
1347	ATCAAGACACTCTGT	A181T	56.17	10.23	3.9	1.46	27.11	1.13
1348	ATCAAGCCATTAACG	C33T,T498A,T504C,G575A	4.64	1.69	0.17	10.14	42.19	41.17
1349	ATCAATAAGCGACGT	A383G,A443G,C567T,G686C	NA	NA	NA	NA	NA	NA
1350	ATCAATCCTCATCCG	WT	61.79	11.06	3.8	1.54	19.29	2.51
1351	ATCAATCGCGTACAT	T130C	67.48	11.1	3.38	1.25	13.72	3.08
1352	ATCAATTGGGTTGGA	WT	57.74	13.66	3.56	1.73	20.12	3.19
1353	ATCAATTTTAATTGG	T440C,T655C,TG669T	67.32	12.5	3.62	1.96	10.24	4.37
1354	ATCACAACGCCTTCG	T84A,CG376C,C411T,C598G	70.42	1.24	3.15	3.98	19.14	2.07
1355	ATCACAGATATCCAT	C159T,C344T,C502T,C577T,G599A,G683C	55.54	11.25	3.21	2.32	26.43	1.25
1356	ATCACAGTACTTTGC	C295G,A385G,A609T,T634A	0.45	87.4	0	0.1	11.25	0.8
1357	ATCACATAACAGCTA	WT	58.36	12.21	5.24	1.63	20.58	1.97
1358	ATCACATTCTATGCT	C55T,A194T,A365T,T419A,T509A	42.61	14.58	3.71	3.01	33.07	3.02
1359	ATCACCTGTGCCCTC	T116C,T130C,T293C,C314A,T429A,C552T,C567T,C612G	34.86	4.57	2.9	7.47	48.13	2.07
1360	ATCACTCATCGATTG	WT	60.24	10.65	4.05	2.08	20.56	2.41
1361	ATCACTCGCAGTTTA	WT	55.27	13.43	4.51	2.33	22.39	2.07
1362	ATCACTCTTTATTAC	A181G,C436T,A494T,C530G	26.28	1.92	0	18.59	45.51	7.7
1363	ATCACTTATGTAAGG	G51A,A202G,G230A,G313A	25.93	35.79	2.63	0.83	31.9	2.92
1364	ATCAGAAACTTACGA	G271T,G348T	70.59	1.41	5.7	2.5	18.43	1.37
1365	ATCAGACATAATACA	G128A	61.27	10.27	3.25	2	20.8	2.4
1366	ATCAGCCTTTCATTA	A118G,T174A,C288T,T504A,T650C	4.9	1.36	0	29.97	59.67	4.09
1367	ATCAGCTCCAATAGA	C262A,TG329T	74.97	1.83	4.23	3.18	13.96	1.83
1368	ATCAGGCTTTATAGT	T186C	61.57	11.57	5.56	1.85	16.67	2.78
1369	ATCAGGTTATCCTTT	G32T,G163A	58.83	11.42	4.97	1.82	21.15	1.81
1370	ATCAGTAATTACAAA	G32A,T130C,A213G,T240C,A268G,T432A,T446A,C515T,G566T,T666C	0.4	91.18	0.02	0.05	7.04	1.3
1371	ATCAGTCGTTGATCC	G260A,A263G,A299T,T386C,A506T	2.29	36	0	16.78	35.06	9.87
1372	ATCAGTCTTCACCCG	C197T,G529C	66.9	10.71	4.31	1.39	14.78	1.9
1373	ATCAGTTCTGCGTTA	T389A,G448T,A560G,G564A,TG669T,G674T	37.06	1.74	1.39	1.7	11.12	47
1374	ATCATACCCATCACG	WT	59.49	12.85	5.5	1.4	18	2.75
1375	ATCATATTTAAACAC	TG308T,T565A,A578T	72.8	2.17	5.56	2.97	15.53	0.97
1376	ATCATCATATACCTG	C151T,T179A,A232G,C415T,T528A	24.32	27.93	1.98	2.52	41.62	1.63
1377	ATCATGTATATTGTC	A147G,A199G,T335C,G479A,G614A,T621A	44.61	18.24	2.83	4.04	27.86	2.43
1378	ATCATGTCTCAACGG	T315C,A425C,C522T,G629C,T666A	68.99	5.48	5.48	1.77	16.31	1.98
1379	ATCATGTTGTAGTGA	A256T,G402A,T509A,G510T,C512A,C571A,G639C,A653T,T661A,A694T	62.02	2.94	0.46	5.77	27	1.81
1380	ATCATTAAAATCCCA	T394C	69.98	3.04	4.6	2.41	18.85	1.1
1381	ATCATTAATTACATT	A44G,T255A	60.54	9.76	3.84	2.69	21.38	1.79
1382	ATCATTACAACCGAT	T153A,T162A,G235A,C339A,G657A	7.62	73.7	1.1	0.29	15.3	1.99
1383	ATCATTATTGATCGT	A44G,C197A,G284A,C367T	54.67	16.65	3.8	2.1	20.49	2.29
1384	ATCCAGAAAAATGAT	G192A	59.9	11.91	4.13	1.64	20.01	2.41
1385	ATCCAGCTAGGCTAC	T218A,T439C	54.39	17.36	3.44	2.46	21.37	0.98
1386	ATCCATATAGAAGTT	T53C,TC137T,T173A	58.23	13.45	3.45	1.68	20.97	2.22
1387	ATCCATCGTGCGCTA	T325A,T465C	41.3	31.73	3.14	1.34	19.97	2.51
1388	ATCCCAGACTTCATG	G189T,T361C,A558T,G639A,A678T	51.42	22.06	3.38	1.42	19.76	1.96
1389	ATCCCCATGAATTCT	A232T,G370T	26.07	47.23	2.81	0.94	20.51	2.43
1390	ATCCCCTAAATGATC	C397A,A447T	5.56	70.59	0.19	0.37	13.31	9.98
1391	ATCCCTCGATCCTAG	T130A,A182G,A492T	NA	NA	NA	NA	NA	NA
1392	ATCCGAGCCGTTGAT	G569A	64.23	12.6	4.27	0.76	15.49	2.64
1393	ATCCGAGGATTTCAG	G395C,A443T,C511T	6.42	88.48	0.29	0.08	3.97	0.75
1394	ATCCGGAAAAATTTA	T274C,T347C,T446C,C577T,TG655T	0.96	82.05	0.14	0.68	16.02	0.14
1395	ATCCGGTGAGATATC	C675T,T697C	57.32	11.47	2.41	2.26	23.99	2.55
1396	ATCCGTGTATACTGC	A667G,T669A,A694G	18.18	1.95	0.32	14.94	64.61	0
1397	ATCCGTGTTGCATTT	C453T,G488A,C514T,A547C,T601A,G647T	60.82	15.6	3.33	1.38	17.28	1.59
1398	ATCCTAATAGGATCA	G109T,A118T,A152T,T153A,A383G,A425G,G470A,A523G,A541G	1.48	0.67	0.13	3.89	82.73	11.1
1399	ATCCTATAAATATTG	A513T,TG553T	64.76	17.23	3.95	1.08	10.94	2.04
1400	ATCCTGAATGGGTAG	C376A,A447G	1.98	83.03	0.16	0.16	13.23	1.44
1401	ATCCTTCATCAAAAT	T29C,T179C,A220T,A252G,C600A	37.22	39.96	3.47	0.99	17	1.35
1402	ATCCTTTGGAAATCG	WT	60.81	11.25	3.74	1.45	19.82	2.93
1403	ATCCTTTGTGGCGTA	A147G,G626A	59.74	12.74	3.41	1.9	19.55	2.67
1404	ATCGAACATTTACGC	A47T,T53A,A118T,C193T,G284T,G651C	71.97	6.98	3.49	2.72	13.19	1.65
1405	ATCGACAGGATTTTA	A296T,C312T,C405A,G433T,T446A,A451G,T516C,T528C,G555T	0.61	73.69	0.04	0.12	9.79	15.74
1406	ATCGACTTTTTTTTA	A558G	58.69	13.59	3.93	2.61	18.83	2.35
1407	ATCGATACCGTAACA	G326A,T631A	56.2	16.25	2.79	0.93	21.52	2.3
1408	ATCGATATCGGTACA	T333A	74.57	3.56	3.72	2.99	13.14	2.02
1409	ATCGATCTTTGACTC	T274A,C423T,T465A,T557C,T696C	50	21.94	0.42	2.08	20.28	5.29
1410	ATCGCACGTCCTATG	WT	60.05	13.07	3.95	1.75	18.94	2.24
1411	ATCGCACTAATTACA	C107T,G229T,C415T,C454A,C552A,A580G	7.89	32	0.14	0.71	59.11	0.14
1412	ATCGCACTGATCATT	G80A,A152G,A177G,T247C,A365T,A451T	48.35	24.91	3.66	0.73	19.41	2.94
1413	ATCGCAGCCTCCAAC	T293C,C400T,G569A,T620A,A685G	62.84	10.1	5.21	1.59	16.78	3.48
1414	ATCGCATCTTGCCTT	WT	60.73	13.15	3.67	2.24	18	2.21
1415	ATCGCCTGTCTTCGA	A323T,T413C	54.12	18.32	3.52	1.49	19.18	3.36
1416	ATCGCGCGACATCGA	AG96A,T267C,G313C,A358G,C468A,T621G,A689T	1.5	86.18	0.22	0.05	8.71	3.33
1417	ATCGCTGCATGCTTT	A65G,G75A,G163A,A232T,T249C,G275A,G402A	59.23	11.16	6.43	1.43	18.93	2.81
1418	ATCGGCAGATAGTAG	G113A,T130C,A166G,T432C,A451T,G531A	73.88	6.17	2.78	3.34	12.13	1.7
1419	ATCGGCTGGAATTTA	G95A,A105T,C114T,T115A,T126A,A177T,G250A,C320T,T329A,T347C,A425G,C434T,C453T,C467G,G481T,T498A,G537C,C612A	2.54	56.51	0.63	1.59	35.56	3.17
1420	ATCGGGCATTCCTGG	A65G,T86C,A166T,G222T,A252G,G272A,A323G,T631A	59.03	9.85	4.88	3.63	20.86	1.75
1421	ATCGGGTCTTACAAT	C121T,C164T,C336T,T613C	16.52	56.45	1.8	0.74	20.87	3.61
1422	ATCGGGTTTTGAATC	G316A	51.45	21.15	3.35	1.19	19.73	3.13
1423	ATCGGTAGTGCGGGT	AG65A,G172A,G362A,C424T,G569A	18.67	57.78	2.67	1.18	16	3.7
1424	ATCGGTGCTGTATTT	T31C,C85A,C148T,A251T,C375T,G457A,T643C	54.29	20.11	3.91	1.46	16.48	3.75
1425	ATCGTAGGTGCTGAC	G350A,C364T,G593A	80.47	0.91	2.87	3.4	10.51	1.84
1426	ATCGTCAACTCACAG	T303A,G488A	68.29	4.31	2.83	3.46	16.25	4.84
1427	ATCGTCTAGGTTTAG	G79A,A256G,A263G	64.19	8.82	2.87	2.87	18.01	3.24
1428	ATCGTCTGGTCCATT	G134A,G677T	64.81	8.39	1.68	2.91	20.69	1.51
1429	ATCGTGAAGATTACA	WT	59.13	12.07	4.11	1.77	20.03	2.89
1430	ATCGTGGGGTCCCGA	C77T,G635A	65.02	8.28	3.36	2.32	18.83	2.19
1431	ATCGTGGGTCGAATT	C375T	51.55	22.94	3.07	0.94	17.94	3.55
1432	ATCGTGGTCATTTAC	A65T,C139A,A343T,G488T,G524T,T631C,G639A,C642A,A648T	0.77	0.37	0	2.77	10.88	85.2
1433	ATCGTGTGATAATGA	T283C,G690T	60.67	6.23	1.73	3.07	25.02	3.28
1434	ATCGTTAACTGCCGG	G366A,T553A,G575A	47.9	21.69	3.88	1.85	20.77	3.9
1435	ATCGTTACTAACTTG	C93T,C450T	68.33	5.55	4.94	2.75	16.74	1.69
1436	ATCGTTCCCAAGATT	A65G,A147T,A199G,A296G,C307T,C450A,G568T,C662T	1.09	69.07	0.08	0.33	26.51	2.92
1437	ATCGTTCGACGGGTC	C148T	66.07	8.36	3.49	2.34	17.27	2.46
1438	ATCGTTGATGACTTT	G30A,C55A,C397A,A494T	68.05	2.91	4.26	1.59	19.85	3.34
1439	ATCGTTGGAAGAGAC	T48A,G52A,T153A,G595T	53.84	17.27	5	1.96	18.79	3.14
1440	ATCGTTTAACAGAGA	C93A,T162A,G230A,G239C,A296T,G353A,G479T	0.44	75.62	0.15	0.15	21.28	2.35
1441	ATCGTTTCTCTTAAT	G215A,C286T,G306C,T335A,A343G,T373C,A609G,T643A,T704C	41.87	6.28	3.48	0.69	44.19	3.48
1442	ATCTAAAAATAACTA	C36T,A383C,C478T,T526C,TG655T	54.76	6.35	2.3	5.25	28.04	3.29
1443	ATCTAATGAGTCGGA	T140A,T491C,C615T,G693A	48.12	7.68	5.67	3.34	32.66	2.53
1444	ATCTACATCTATTAG	T31C,G227A	52.51	13.62	4.4	2.05	24.98	2.42
1445	ATCTACTGATAGATC	G67T,G113T,C364T,T465C,T620A	22.12	59.68	1.34	1.06	13.83	1.97
1446	ATCTCACTGGGAGTG	WT	60.12	11.42	4.11	1.79	18.97	3.59
1447	ATCTCCTTAATTCTA	C92T,C406T,T643C	59.68	9.71	5.02	1.61	20.37	3.6
1448	ATCTCCTTAGGGTTG	G100A,A209G,A338T,G639A	62.74	8.59	5.7	1.48	19.03	2.45
1449	ATCTCCTTTATTATG	G433A	55.58	11.55	3.73	1.87	23.05	4.21
1450	ATCTCGAAGGAGCAA	T117C,G258A	51.4	17.87	4.42	1.15	21.72	3.44
1451	ATCTCTATCTAGGAGT	G35A,T38C,T270C,T347C,C602T	75.97	3.56	4.45	2.34	11.8	1.87
1452	ATCTGAACAACTTGG	T117C,A282C,C411T	27.03	20.28	4.57	0.4	42.54	5.18
1453	ATCTGAGCTTCATTA	T74A,G97A,G372A,G414A,T565A	44.47	22.77	4.29	1.33	22.77	4.38
1454	ATCTGATAACCATAA	A451T,C502A,G540A	63.27	4	3.97	3.87	21.76	3.14
1455	ATCTGATAGCGTACA	A78G,G353C,T440A,A594G,T632A	43.26	0.9	1.23	10.9	43.15	0.55
1456	ATCTGATTTCTCATA	WT	57.46	11.6	3.83	2.19	22.81	2.1
1457	ATCTGGCCTGCCTAT	G461A,C551T,G569A,G573T,A663G	37.77	41.29	1.76	1.5	11.09	6.59
1458	ATCTGGTTCGTTTGT	A203T	65.19	11.38	3.08	1.91	16.03	2.4
1459	ATCTGTATTTTTAAA	T557C	53.29	12.82	7.48	1.52	22.14	2.74
1460	ATCTGTTCCAATCCC	WT	62.7	11.34	4.1	3.01	15.57	3.28
1461	ATCTGTTTTAAATTA	A45T	52.59	11.85	5.68	2.47	23.46	3.95
1462	ATCTTACACATAGTA	A252G,T335C,G422A,T601C,A653T	46.38	8.71	2.79	1.81	26.81	13.48
1463	ATCTTACCCTCCACG	WT	61.88	10.31	4.9	2.89	17.61	2.4
1464	ATCTTACTTACTGTA	G318A,T516G,C571T	7.05	1.53	0.92	10.73	75.46	4.3
1465	ATCTTATCAATAAGC	A59T,T329C,A641T	74.43	2.35	4.5	3.56	13.61	1.55
1466	ATCTTATCTTCCATA	G123A,A188G,A191G,T419A	61.78	5.28	4.88	1.22	25.2	1.64
1467	ATCTTATTTGATGGT	C55T,A101G,C125A,A152G,T179A,A232T,A323T,C364T,T601A,G614A	31.31	23.64	3.51	2.24	38.66	0.64
1468	ATCTTCCTGTGTCCT	WT	65.25	11.49	2.67	2.22	16.82	1.55
1469	ATCTTGTTAATTGCG	C281T,G305A,A438G,T608A	75.59	3.1	5.16	2.43	12.54	1.17
1470	ATCTTTATTTGACTG	G72T,G305T	78.46	1.85	1.98	3.71	12.55	1.44
1471	ATCTTTCTTAACTCC	T440A,T666A	54.74	16.22	3.77	2.19	21.87	1.21
1472	ATCTTTGCCACCTCA	G633T	NA	NA	NA	NA	NA	NA
1473	ATGAAAATCCCACAA	C198A,A263T,G322T,T394C,T429C,A513G,C598T,T632C	57.51	7.62	5.1	1.9	25.4	2.47
1474	ATGAAAATTACTAAC	G244A,G388A,G544C,C603T,C615A	49.93	4.06	3.59	2.63	35.12	4.67
1475	ATGAAGCAGGAGGCA	G51A,A213G,T280A,T321A,T420C	11.13	43.23	2.88	0.72	36.83	5.2
1476	ATGAATAGACGCAGG	A220T,G234A,G276C,T329A,C468T,C642T	50.28	24.46	3.53	1.45	17.3	2.98
1477	ATGAATGATGGGGTG	T50C,AC59A	54.9	13.98	4.61	1.44	21.76	3.32
1478	ATGACATGCCAGAAT	A299G,T386A	5.71	79.29	0.89	0.35	12.02	1.74
1479	ATGACATTAGTCTTA	A120G,A166G,G702A	56.67	12.54	4.52	2.06	22.44	1.78
1480	ATGACGCGGATTACC	C63T,G73A,C418T,G517A	53.31	26.09	2.58	1.34	15.71	0.96
1481	ATGACTTGAATGTGA	T122C,C369T,A682T	45.52	26.88	2.51	1.52	19.72	3.85
1482	ATGAGGGATATGCCC	A282T,A456C	48.01	12.2	4.47	1.49	29.75	4.08
1483	ATGAGGTAGAAGTA	C142G,C279A,A365G,G366T,T432C,G525A	59.87	4.75	3.08	4.01	20.6	7.7
1484	ATGAGGTGGGGGGGG	C265A,C522T,G529C,G559T,G644A	76.89	7.26	2.51	2.07	6.37	4.9
1485	ATGAGTATGTGTAAT	C139A,C143T,A477T,G617A,T650C	44.51	5.35	2.88	4.52	41.22	1.51
1486	ATGAGTCTGTCCGTG	C552A,G555T,G636A,CG675C,A681G,C687G	61.32	11.72	1.69	1.73	9.6	13.95
1487	ATGATAATGCTTCCA	T622C	66.33	11.38	2.81	1.81	14.29	3.37
1488	ATGATACCATCGTAT	T116C,G294A,A462G,A685G	61.47	12.04	4.16	2.61	18.44	1.27
1489	ATGATAGAGTCCTTC	A494G	60.25	9.01	5.59	1.24	21.12	2.79
1490	ATGATATATTTGTAT	T50C	57.16	10.98	3.86	2.04	23.83	2.12
1491	ATGATATCACACTTA	T270A	61.41	9.31	3.53	2.59	21.11	2.05
1492	ATGATATGAATAGAC	WT	58.89	11.57	3.6	1.82	21.64	2.48
1493	ATGATATTAAGGTTT	G488A	56.31	9.7	3.57	2.56	22.26	5.6
1494	ATGATCATCAAAGA	A147C	62.23	14.02	4.04	1.39	16.33	1.99
1495	ATGATCCTCCCGGCG	G561A	61.67	12.26	3.45	1.51	18.51	2.59
1496	ATGATGACGTTTTTC	A203G,T293A,A456G,T666C,A685G	2.21	34.48	0.14	0.41	48.42	14.34
1497	ATGATGGTGAATAGT	C62A,C149T,G189C,T291A,T374C,GC517G,G531C,A541T,T688C	2.71	28.92	0.27	0	65.13	2.98
1498	ATGATGTTGGCTGAG	A238G,A456T,A681T	65.81	10.06	2.77	3.49	15.86	2.02
1499	ATGATTATATTCCGA	C266T	64.71	5.88	1.96	1.31	24.18	1.96
1500	ATGATTGGGATGGAT	T50C,T126C,G189A,T390G,G574A,T697C	59.67	17.52	3.4	1.11	13.39	4.9
1501	ATGATTTGCAATGTG	G99T	61.2	11.27	3.26	2.38	18.4	3.5
1502	ATGCAAATAGGGAGT	G66T,G310T,A365G,A408T,T562C,G657A	79.64	2.75	3.42	3.09	9.41	1.69
1503	ATGCAACATAATCAA	CG376C,G481A	45.92	13.92	2.93	2.4	23.02	11.81
1504	ATGCAGCCATCCGTT	T53C,C92A,T153A,C397T,C482G	63.57	6.78	2.82	1.41	24.01	1.41
1505	ATGCAGTGGTTGGTT	WT	60.32	12.8	4.27	1.51	19.83	1.25
1506	ATGCATCTTCAGGAT	WT	64.6	9.5	4.27	1.83	17.35	2.45
1507	ATGCCCTCATTATTC	G470A,A572G,C627T	39.58	17.11	2.56	5.7	33.99	1.05
1508	ATGCCCTTTTGTAAT	T117A,C169T,C288A,G496A,T545C	48.23	17.9	4.44	1.71	25.77	1.94
1509	ATGCCGATAGAAAAC	A83T,T508A	59.18	12.98	2.86	1.53	18.8	4.66
1510	ATGCCGGAATAGTGA	A156G,G272A,TG303T	80.87	0.62	3.92	5.7	7.79	1.1
1511	ATGCCTCAACCTCAA	T31A,A82G,C281T,T293C,G496T	55.64	7.9	4.67	2.33	25.85	3.61
1512	ATGCGACGCCCATTA	G56A,T137C,C281T,G449A	7.12	72.61	0.82	0.54	16.17	2.74
1513	ATGCGAGAATTATAA	A246T,G326T,T440A,T528C	48.59	19.5	3.19	2.24	24.97	1.5
1514	ATGCGAGAGTTAAAC	C155T,C369T	41	24.33	4.53	1.23	24.92	4
1515	ATGCGAGCAATGTAG	C675T	59.21	10.8	4.34	2.12	21.02	2.51
1516	ATGCGATCAGCGGGG	A263T	63.62	10.26	3.42	2.54	18.54	1.62
1517	ATGCGATGTGATAAG	G80A,A83G,C514T	71.08	13.04	3.35	0.67	10.37	1.49
1518	ATGCGATTCTAAGTG	GC617G,T628A	61.16	16.93	3.02	2.37	13.65	2.89
1519	ATGCGTACCTAGAAG	G109C,CT412C,C591G	61.14	10.11	3.98	2.23	19.76	2.78
1520	ATGCGTTATGTGTAT	T31C	55.38	11.54	3.51	1.76	25.49	2.32
1521	ATGCGTTCCATGATA	A199G,C520A	55.93	8.69	3.46	2.71	25.3	3.91
1522	ATGCTAACGTGGGGG	C406T,A541G,C589T	60.33	8.16	5.64	1.98	19.97	3.91
1523	ATGCTATACTATCCA	T557A,G575T	49.62	25.52	6.31	1.14	14.56	2.84
1524	ATGCTCTTTCGGCCT	G75A,G499A,T655C,G674C	55.15	11.45	2.48	3.02	25.06	2.86
1525	ATGCTGTCTCTCTCA	C287G,T389C,A474G	62.55	5.92	4.53	2.24	21.75	3.01
1526	ATGCTTCAAGTACCC	WT	60.02	11.11	4.13	2.03	20.5	2.21
1527	ATGCTTCAATTGTAA	A547T,C577A,A578G,G635T	55.35	7.19	3.59	4.94	27.67	1.26
1528	ATGCTTCTTACCGAC	T74C,C133A,G391A,T401C	55.83	22.33	2.91	1.62	12.62	4.68
1529	ATGCTTGAGGGATTT	C489T,A549G	63.94	14.67	4.02	1.64	14.5	1.22
1530	ATGCTTTATGATACA	T29A,T126A,C367T,T465C,C649T,A681G	41.43	22.21	3.01	2.31	29.51	1.53
1531	ATGCTTTCCTCTTTA	G98A,C197A,C292T,C407T,T605A,T631A	67.46	4.78	1.62	5.68	18.54	1.91
1532	ATGGAAAAGAACCTG	A542T	55.58	9.83	4.11	2.1	21.95	6.42
1533	ATGGAAGATCCTAAC	G227A,G441C,C654T,T666A	49.38	19.07	3.64	1.98	24.36	1.56
1534	ATGGATAAAGCGCGT	WT	59.26	11.27	4.14	1.74	21.22	2.38
1535	ATGGATCATATTCAC	C94T,T432C,A523G	1.73	0.53	0.05	17.89	36.76	43.03
1536	ATGGATGTGTCTTGT	A541G,A663T	63.19	10.37	3.87	1.68	18.77	2.12
1537	ATGGATTCAGCTCAC	G350A	82.56	0.55	3.71	3.58	7.83	1.78
1538	ATGGATTTGTTTGAT	C530T,GC569G,C630G,T672C	64.95	10.13	2.3	3.67	16.04	2.91
1539	ATGGCAAAACACACT	C339T,T440C,C515A	15.93	58.84	1.02	0.64	20.47	3.09
1540	ATGGCACGAACTGGG	G564A	59.6	16.62	4.52	1.38	14.1	3.78
1541	ATGGCTAACTACTTA	T86A	43.98	14.24	4.35	2.43	31.75	3.26
1542	ATGGCTTATGTTCCG	WT	60.05	10.72	3.08	2.35	19.97	3.83
1543	ATGGGAAGGCATGCT	A356T	51.2	18.06	4.01	1.59	22.73	2.41
1544	ATGGGATTCAAAAAA	T131A,A182T,T392C,G444T,TG459T,C482T,G639A,A689G	0.5	93.16	0	0	4.67	1.67
1545	ATGGGGAGAGAGGAG	T111A,C400A,A560T	70.72	7.76	3.79	1.49	13.9	2.34
1546	ATGGGGCCTTTTTAA	CA64C,T116C,A214G	47.9	14.08	7.04	0.7	28.88	1.4
1547	ATGGGGGTTACAAAT	C158T,A513T	62.46	12.63	5.44	1.64	16.13	1.69
1548	ATGGGGTAAGATAAG	G43T,A296T,T302C,A451G,A477T,A523G,G583A,G664T	0.78	0.51	0	0.13	51.74	46.84
1549	ATGGGGTTAAATAAG	A147G,G352T	67.44	4.23	5.46	1.87	19.14	1.86
1550	ATGGGTCTGAAAACC	C185T	NA	NA	NA	NA	NA	NA
1551	ATGGGTCTTTGTTTA	A26T,G79T,T86A,G104T,A105G,A181G,TG270T,T321A,A358G,T528C,A549T,G599A	2.02	79.96	0.14	0.14	13.85	3.89
1552	ATGGGTTTCTGGTTA	G244A,C424A	43.11	19.08	3.18	1.24	27.92	5.48
1553	ATGGTAACAGTCCAC	T655C	66.44	14.33	2.4	1.93	12.3	2.61
1554	ATGGTACTAATAACT	WT	55	11.28	4.48	1.39	25.18	2.66
1555	ATGGTCACCTACATC	T170C,T601C	54.62	10.45	4.92	2.97	24.59	2.44
1556	ATGGTCACTAGACTT	G56A,A69G,C197T,T241C,G359A,A506T,C519T	1.65	18.32	0.55	3.84	67.77	7.87
1557	ATGGTGGGCGGCGGG	A167G,G239T,G245A,G306T,A323T,C403A	75.19	2.77	4.16	2.17	14.46	1.26
1558	ATGGTGGGTCTCAAT	G76A,G183T,T401A,GC517G,G617A	41.08	2.23	0.96	6.69	37.58	11.47
1559	ATGGTGTGAAATAAT	C273G,C600A,T666C	57.26	10.62	1.98	2.96	24.65	2.53
1560	ATGGTGTTTGTGCTG	G79A,A252C	57.7	11.47	5.38	2.15	21.86	1.44
1561	ATGTACTCTTCGACT	A167T,G387T,A408G,C619A	59.84	11.76	3.82	1.5	19.37	3.71
1562	ATGTAGAAAATTTTA	T53C,A214T,T347A,G380T,T508A,T610A,T661A	66.19	0.82	3.59	1.47	25.17	2.77
1563	ATGTAGATAATCGTA	T70C,T115A,T137A,G531A,T658C	64.27	7.67	2.51	3.08	20.86	1.6
1564	ATGTAGGGGAGCACG	WT	57.87	10.46	4.81	1.7	21.77	3.39
1565	ATGTAGTTTTCCCTC	G190T,C261T,T270C,T315C,G340A,T420C,T459A,T498C,G500T	52.26	11.73	2.34	1.68	31.15	0.84
1566	ATGTATCATCTGCCT	T335A,C375G,A590G	40.65	25.99	2.91	2.28	25.47	2.69
1567	ATGTATGGAACTCAG	WT	58.11	11.81	4.8	1.06	21.81	2.41
1568	ATGTATGTCTGCACA	G378T,G470T,T601C	45.81	3.55	3.28	3.41	33.56	10.37
1569	ATGTCAATGTCATAA	A462G,T504C,C615A,C627T	3.3	1.42	0.47	18.63	75	1.18
1570	ATGTCATTAGTATTC	G79T,A383G,A443G,A685T	3.63	87.97	0.1	0.27	7.44	0.58
1571	ATGTCGTGAATCAGC	G43T,G161A,G331T,A338G,T446A,C467A,C552A,C615T,C627T,G664A	0	58.16	0	0.35	40.78	0.71
1572	ATGTCTACGATGCGA	G421A,G444T,G575A,T628A,G702A	0.41	90.62	0	0	6.93	2.04
1573	ATGTCTCACGTTAAT	G30A,G264A,G331C	80.83	0.9	3.83	5.02	8.26	1.16
1574	ATGTCTCGCCCTAGA	C360A,A513C	56.47	11.14	2.94	3.2	18.96	7.29
1575	ATGTCTTGTCAGTAA	A171T	59.62	13.53	3.87	1.85	18.68	2.44
1576	ATGTGAACCATCCGA	A214T,G472A,C552A,G566A,T696A	33.94	5.55	0.62	3.09	53.49	3.31
1577	ATGTGAGTTTTTAGT	A451T	60.81	6.71	3.9	3.08	22.55	2.95
1578	ATGTGGGGCTGAATT	A282G,A383G	8.79	45.73	1.51	0.5	42.21	1.26
1579	ATGTGTAAGGCATAT	A44C,T126C,G221T,T303A,G378A,A473T,A485G,G534C,A594T,T610A,A648G	51.74	1.31	2.7	9.51	33.77	0.96
1580	ATGTTACTCATATTC	A105G,C144T,A226AG,T274C,A323G,A428G,G524A,T701A	1.87	0.67	0.26	1.2	72.7	23.3
1581	ATGTTATCAAAGAAA	T392C,T509C,T550A,T666C	48.07	5.85	1.86	7.97	35.19	1.06
1582	ATGTTGACTCAATCG	G271T,T613A	71.88	2.52	4.14	3.02	17.14	1.31
1583	ATGTTGTCAGTGTAG	A156G,A323T,T586C	51.29	20.48	3.71	1.35	19.06	4.11
1584	ATGTTTATACTTGAA	T240C,T255A,A580G	59.53	4.26	1.7	5.25	28.31	0.95
1585	ATGTTTGTTGGTGGT	G80C,G217A,A263G,T327A,A485T,C640T,G656T	74.61	8.63	1.82	2.26	10.58	2.11
1586	ATGTTTTCTAAAATA	WT	59.91	10.29	4.56	1.84	21.65	1.74
1587	ATGTTTTGCAATCAG	A202G,A334G	63.85	8.68	4.58	1.91	17.56	3.41
1588	ATTAAAAATGACAAA	A358G,T459A,C476T,G636A	1.49	86.72	0.45	0.1	9.74	1.5
1589	ATTAAACTGTTTAAT	G449A,GC517G,CA571C	5.24	46.24	0.2	1.48	21.04	25.8
1590	ATTAAAGGCGGCCTG	T29C,T86C,T218C,G239A,T361C,T419A,T465A,G573T,T581C,T613C,T634C,G670A	43.45	23.43	3.15	2.01	22.04	5.93
1591	ATTAACCTACTACTT	G27A,G103A,A167T,A191G,A462G,T504C,T539A,G614C	0.9	0	0	3.6	95.5	0
1592	ATTAACTAATTTGAC	G569A,A578T	54.66	14.17	5	0.94	22.54	2.68
1593	ATTAACTAGAAGTTC	C164T,T327A	62.34	7.78	5.08	2.25	20.66	1.88
1594	ATTAACTTCTACTGA	T122G,G215C,G235A,G448A,G595A,G676C,A682G	62.01	1.41	11.48	0.53	22.09	2.48
1595	ATTAAGGAAACTCTA	A191G,G599A	53.72	8.88	3.93	1.57	30.11	1.78
1596	ATTAATGAAGAATCA	T136C,A220T,T321C,T335C,T543A,T697C	70.12	6.47	2.9	3.29	15.72	1.49
1597	ATTAATGCGCTCCAA	C144A,C292A	6.01	72.98	0.65	0.22	17.91	2.23
1598	ATTAATGGGTACACT	T42C,G103A,T249A,T389C	63.38	4.72	4.24	2.39	23.17	2.1
1599	ATTAATGTCTATAAG	WT	60.95	8.1	3.27	1.69	23.58	2.42
1600	ATTAATGTTGTTGGG	A26G,T90C,T122C,C164T,GC395G,A485G	60.14	12.64	5.88	1.32	16.5	3.51
1601	ATTAATTCACCTCGT	WT	61.83	10.25	3.41	1.29	20.96	2.25
1602	ATTAATTTTAAGTAT	A365T	41.1	21.8	3.26	2.76	28.7	2.39
1603	ATTACAATTGACAAA	A268G,T622A,G636A	55.19	6.54	8.13	1.38	24.52	4.23
1604	ATTACAGTTTTCCAA	T116A,T201A,G272A,T283C,C527A,T532C	75.02	1.39	4.45	6.69	10	2.45
1605	ATTACATCACTTTCT	A57G,G234A,CG376C,G381T,G431A,C511G	45.59	2.31	1.91	5.43	26.71	18.06
1606	ATTACATCCCGCAAG	A96T,G264T,G349T	70.53	4.18	3.03	2.61	18.21	1.44
1607	ATTACATGTTATGCA	C125A,C314T,G537T,A558T,A694T	8.67	0.53	0	10.76	79.26	0.78
1608	ATTACCAAAGATATA	C286T,C295A,C400G	1.12	80.99	0.04	0.08	16.57	1.2
1609	ATTACGATTCAGGTT	CT37C,A45T,G67A,C92T,A120G,C121G,T126C,C184T,G222A,C376A,C384G,G500A	25	57.04	2.34	1.56	13.28	0.78
1610	ATTACTAAAATTTCG	A203T,TG498T,T508A,T672C	23.31	5.18	1.71	9.5	37.68	22.63
1611	ATTACTTATTTGCTG	G330T,C369T,C442T,G584A,T688C	22.51	52.87	2.57	0.75	19.94	1.35
1612	ATTACTTCACCGAGT	T29A,G51A,TG111T,T634C	59.62	11.36	3.15	1.54	21.27	3.06
1613	ATTAGAAATCATCAT	A177G,A334G,C455T,A597T	53.96	14.25	4.38	2.61	22.74	2.07
1614	ATTAGACAAGACTTT	A44G,C587A	59.4	12.27	3.88	2.52	18.72	3.21
1615	ATTAGCAAATATCTT	G488A	53.14	11.71	4.26	1.67	23.39	5.83
1616	ATTAGCTTCATTAA	A246G,T354C,G531A	24.53	46.96	2.25	0.41	23.36	2.49
1617	ATTAGGACAGATAGG	G99A,A641T,A694T	25.75	1.99	0.37	33.46	38.19	0.24
1618	ATTAGTACCGTTCGA	A101G,A156G,T207A,G330T,T409A,T419C,T528A,T660A,G680T	58.4	0.78	2.34	8.79	28.92	0.77
1619	ATTAGTCTATCGGCT	G433A,G471A,C527T	35.1	15.75	2.25	3.26	39.59	4.04
1620	ATTAGTGGCATAGGT	A65G,C418A,G574T	55.05	16.03	4.07	1.45	19.22	4.18
1621	ATTAGTTTACCACTT	A356T,T498C	37.88	14.65	2.53	2.27	38.38	4.3
1622	ATTATAAAATTCCAT	C176T,G644A	60.18	9.36	4.27	2.61	21.21	2.37
1623	ATTATAGAGATATCT	G683T	59.79	15.26	3.67	1.24	15.93	4.11
1624	ATTATATCTCAATCT	WT	56.89	12.01	3.86	2.06	23.29	1.89
1625	ATTATATTTCCCTTC	G651T,G671A,G690T	74.4	8.13	1.03	2.43	11.96	2.04
1626	ATTATCATTAAATAC	TG274T,T655C	42.07	11.71	9.52	1.61	31.75	3.34
1627	ATTATCCACTTGTTG	T283C,G331A,G366A,C369T,A483G	61.72	2.69	5.63	2.93	24.95	2.08
1628	ATTATCGACTATAAA	A462G,A592G	51.44	9.7	3.36	5.12	29.91	0.46
1629	ATTATCGATCAATAG	G72A	59	11.29	4.07	2.32	20.84	2.48
1630	ATTATCGTAATATA	T557A	58.63	22.38	3.34	0.98	10.15	4.52
1631	ATTATCTGTCTGATA	A214G	50.75	9.01	4.21	2.25	31.83	1.95
1632	ATTATCTTCTCAGTC	G271T,G507A	78.06	4.7	4.47	0.98	10.16	1.62
1633	ATTATGAATAACGAC	C482T,T625C	66.51	6.32	4.45	2.11	18.74	1.87
1634	ATTATGATTAATACG	C114T,C591T	60.32	8.92	3.15	2.84	22.41	2.37
1635	ATTATGGCTGAGTCT	C149A,T195A,T216C,A238T,C612T	57.59	6.42	2.87	2.03	28.04	3.05
1636	ATTATGTCCTTTGTA	T283A,G352T	13.39	49.93	2.73	0.14	28.64	5.16
1637	ATTATTAATGTTCTT	G242A,C397T,T586C,T621A,C668T	60.69	4.21	5.26	1.99	22.82	5.02
1638	ATTATTATTCGTCCT	A65G,T329C,T504G,G538T	1.8	0.71	0	40.69	49.64	7.17
1639	ATTATTCCTGCAGTA	A44T,C149T,C411T,T625A,T669A	59.65	2.89	5.63	3.22	26.61	2
1640	ATTATTCGCTTGTTT	G106A,G250C,G353A,T616A,T696C	59.17	0.75	0.94	12.76	23.14	3.24
1641	ATTATTGACGATCGA	A44G,G97A,T270C,A578G	66.36	12.12	3.15	1.44	15.07	1.85
1642	ATTATTGCGTGGTTT	G276A,T321C,C442T,G673T	43.57	30.33	2.89	2.58	17.81	2.82
1643	ATTATTGTAATTTAC	WT	53.21	12.2	5.2	2.24	24.73	2.42
1644	ATTATTTCTTGCTAT	TG605T	56.75	17.11	3.29	1.81	18.75	2.29
1645	ATTATTTTCACAGAC	G331C	82.91	1.14	3.52	3.47	8.42	0.55
1646	ATTCAAATACACGTG	T200A,G306A,C375A,A492C,C588T	76.62	1.66	4.45	2.65	12.22	2.4
1647	ATTCAAATTGTAATG	WT	57.97	12.4	5.35	1.61	20.46	2.21
1648	ATTCAATTTGCGGAT	G113C,G227A,T672A	53.71	16.94	5.34	1.08	20.6	2.32
1649	ATTCAGTGACACTAA	T136C,A188C,A220T,G331A,A513T,T581C	71.49	4.92	4.22	3.8	13.06	2.52
1650	ATTCATACTGTCCAT	C478T,T553C,G564A	59.7	17.32	3.7	1.05	15.15	3.08
1651	ATTCATTACATTTAA	G95GA,C589A	56.01	10.88	5.3	1.11	23.63	3.07
1652	ATTCATTTAAAAGTG	A408T	50.4	15.39	4.91	1.77	23.45	4.08
1653	ATTCCAAATCACCAT	T347C,G359A,G531A	70.62	4.74	3.48	2.71	16.33	2.12
1654	ATTCCACATATCTAT	T70C,AC156A,A167T,T205A	61.62	12.14	4.05	1.86	17.64	2.7
1655	ATTCCATCACCTTGA	C41G,T53A,T86C,C94T,C237T,T321A,T329C,C423T,C511A,G623A	64.63	14.36	2.77	1.72	11.32	5.2
1656	ATTCCATTATTTTCG	A88G,T140C,A296T,C400G,G422A,C458A,G507A,G531A,G607A	0.35	82.65	0	0.35	11.33	5.32
1657	ATTCCGATGTGTTT	G97A,C324T,C637A,A667T	44.55	35.64	2.7	1.12	10.55	5.43
1658	ATTCCGCATGGAGGT	T241A,G258A,G496A,C612A	49.64	18.9	2.45	1.68	21.78	5.54
1659	ATTCCGCTATCAAAA	C55T,C197A,A209G,T249C,G309T,G318C,A653T,C675T,G695A	17.01	0	0	21.09	60.54	1.36
1660	ATTCCTAGATGTTTG	WT	56.26	11.76	3.33	2.82	22.75	3.09
1661	ATTCGACTCTTCTTT	T207A,A494C,G595A,G644A	63.37	16.62	3.11	1.02	11.16	4.72
1662	ATTCGAGCTAAGTTT	C490A	62.45	11.44	3.83	1.86	17.08	3.34
1663	ATTCGATTAACCCA	T86C,A251T,G525A,T650C	45.09	4.21	1.73	7.44	33.87	7.66
1664	ATTCGCCGCACCCCC	C110T,G190A,G297T,G313A,A694T	2.23	38.4	0	0.89	57.59	0.88
1665	ATTCGGACTTATCT	WT	65.27	14.88	2.45	1.49	13.42	2.49
1666	ATTCGGTTATGAGCG	AG256A,T419C	63.86	5.91	6.53	1.47	19.5	2.74
1667	ATTCGTTAATGATAG	G72C,G377A,G555A,G674A	67.97	8.06	4.88	1.38	15.2	2.51
1668	ATTCGTTGCTACTGA	T532G	57.58	15.71	4.74	0.84	15.96	5.17
1669	ATTCGTTTATTAGCT	T289C,A385T,G525A,A542G,A572G,G583T	5.35	8.22	0.2	1.48	64.65	20.11
1670	ATTCTAATCCGGTCC	GA427G	44.9	29.73	2.37	1.38	20.42	1.19
1671	ATTCTATCAGTCTTA	WT	59.78	15.23	2.74	2.35	17.19	2.72
1672	ATTCTATCCCTGAAC	C61T,A219G,A253G,G379T,G395A,G461A,G517A,T539C,G554A	52.4	1.75	1.3	9.54	18.61	16.4
1673	ATTCTATGTTAGAAG	C62T,C324T,T498C,C591T,C624A,G670T	38.22	18.47	2.8	4.7	32.85	2.97
1674	ATTCTATTACACGTG	WT	58.8	12.44	4.11	1.55	20.53	2.59
1675	ATTCTCAAATGGGAA	A57G,C121A,T429A,C497T	44.11	9.98	2.72	6.69	32.99	3.51
1676	ATTCTCCTTCATTCA	WT	60.31	12.5	2.78	1.78	19.84	2.79
1677	ATTCTCGGAATAATT	G112A,A513G	59.62	6.73	5.77	1.28	23.08	3.52
1678	ATTCTGGCTGTATCG	C145G,T401C	69.21	5.88	3.56	2.32	16.87	2.16
1679	ATTGAAAAATTCGAG	G49A,G257T,T277C,A368G,G402A,G690A	57.57	2.94	1.62	4.68	31.06	2.12
1680	ATTGAATGTTCAACC	G180A	58.87	10.57	6.04	1.51	21.51	1.5
1681	ATTGAATTTTATATG	G538T,G607A	54.84	8.11	3.85	3.49	27.99	1.72
1682	ATTGAGATACACAAT	G230A,A253G,T274C,G430A,T532C	23.14	51.54	1.51	0.47	21.07	2.27
1683	ATTGAGTAGTACTAC	G457A	58.78	10.36	4.73	2.19	22.02	1.92
1684	ATTGATACTGTTATG	T249C,C396T,T650C	53.21	5.35	2.67	4.54	31.01	3.22
1685	ATTGATCCGCTCCCG	T249C,T280A	10.23	57.52	2.43	0.53	25.05	4.24
1686	ATTGATCGAACCGCA	C603A,T632A	58.34	8.62	3.06	2.97	24.81	2.21
1687	ATTGATGTTTGTGGT	G366A,C403A,T459C,T616C,A641G	53.2	18.66	3.09	1.77	19.95	3.33
1688	ATTGATTCTTAATTG	G80T,G607A	58.68	12.71	3.82	1.91	19.78	3.1
1689	ATTGATTTTGCCCTT	C94G,T137C,T174C,G294A,G579T,A609G	64.34	7.76	3.21	2.69	19.98	2.01
1690	ATTGCACGCACTATT	G72A,A152G,T655A	61.17	13.62	3.05	1.78	18.07	2.31
1691	ATTGCATGGGCCAGA	G35A,T53C,G189T,C288A,GT353G,A597G,T628A	6.51	64.23	1.16	0.46	25.21	2.44
1692	ATTGCCATTTTATTA	A371G,G479T,A580G,T650A	8.79	37.19	0.74	1.37	47.57	4.34
1693	ATTGCGGTAGATTTC	A59T,C193T,T289A,C364T,G499A,A513G,C646T	3.86	60	0	0.45	32.27	3.42
1694	ATTGCTAGAATACCA	T173G,C369T,T419A	57.79	14.07	2.22	0.74	22.22	2.96
1695	ATTGCTTAACCTCGC	T136A,T536C,G555T	53.37	15.63	3.6	1.68	17.21	8.5
1696	ATTGGATCATGTCCC	G275A	58.62	12.33	4.9	1.29	19.81	3.05
1697	ATTGGCATGTTTCAT	C197A,G332A	83.83	0.56	3.62	3.31	7.35	1.33
1698	ATTGGCGACTCATAG	T283A,G500T,G566A	4.7	76.67	0.63	0.18	14.56	3.26
1699	ATTGGCGAGGGACAG	A299T,G674A	69.65	5.14	5.59	2.05	15.28	2.28
1700	ATTGGGGACTATAAC	G79T,G331T,G379A,C450T,A541G,T543A,T621G	89.56	0.32	2.21	3.49	3.73	0.69
1701	ATTGGGTATACCGCG	T31C,G161A,G196A,G217A,C397A	75.34	3.1	4.27	1.55	12.22	3.52
1702	ATTGGGTGATTGTAA	C154T,A226AG,G387T,G574A,G617T,T669A	60.52	14.92	3.72	1.14	14.82	4.88
1703	ATTGGTGACGGAATA	G204A,A365G,G441T,A483T,G529T,C577A	71.17	4.83	5.03	1.8	16.22	0.95
1704	ATTGGTGTAACAAGG	A268G	63.16	6.04	7.94	1.59	19.04	2.23
1705	ATTGGTTCTATTTTG	WT	56.19	13.09	5.48	1.19	20.95	3.1
1706	ATTGTAACCATAAGG	C110A,G235T	51.23	18.51	2.76	1.3	23.62	2.59
1707	ATTGTATAGTCACAC	G72T,G97A,G104A,C158T,A253C,T704C	60.18	11.98	3.82	1.85	19.15	3.02
1708	ATTGTCCCAATACTG	T70C,A232T,T432C	67.58	7.55	3.72	2.57	17.13	1.45
1709	ATTGTCGGACCGCCC	C367T	51.93	18.43	3.58	1.19	21.91	2.96
1710	ATTGTCTATATGAAG	G27T,T111A,A236T,C478T	57.88	16.14	4.64	2.22	15.77	3.35
1711	ATTGTCTTATAATCT	T86C,A451T,C646A	54.57	7.65	4.25	3.04	28.19	2.3
1712	ATTGTGCCAACTTCC	T212A,G331T,A368G,G372A,T390A,T429C,GC517G,T532C,G569A,G635T,C665T	1.32	1.32	3.29	0.65	88.82	4.6
1713	ATTGTGTCTCGCGAG	C164G,A296T,G313A,C399T	0.39	85.35	0	0.04	11.62	2.6
1714	ATTGTTATAATGCGA	T131C,G215A,G271A,C273T,GC362G,A597G,G599A,C646T	49.24	2.03	1.27	2.54	43.65	1.28
1715	ATTGTTCGGAGTGAC	A188G	59.39	11.46	2.62	1.31	22.05	3.17
1716	ATTGTTTAAATTATA	A252T	49.14	16.87	4.68	1.53	25.43	2.34
1717	ATTTAAGCACCCTCC	T291C	14.42	59.61	1.37	0.71	21.46	2.43
1718	ATTTAATGCTAAATA	C61T,G243T,T270C,C497T,A547G,G651A	54.43	6.66	2.7	3.83	28.26	4.11
1719	ATTTAATTGGGTCTA	G331A,G457A,G656C	75.61	1.12	2.6	4.47	14.44	1.77
1720	ATTTAGAAACCCGTA	T140C	58.06	11.66	4.77	1.64	21.75	2.12
1721	ATTTAGAACTCTAGC	A44G,G81T,T111A,T136C,T174C,G190A,G331C,T628A,T634A	75.32	1.3	4.49	3.54	14.87	0.47
1722	ATTTAGCAATCACTT	WT	57.28	12.36	3.99	1.83	21.52	3.02
1723	ATTTAGGGTGTGTAC	C165T,T446C,G488A	0.23	85.83	0.03	0.03	10.94	2.94
1724	ATTTAGGTATCCAT	T536A	57.75	10.77	2.9	2.3	21.56	4.71
1725	ATTTAGTGGGCACCG	A475G	57.18	13.57	3.29	1.36	20.35	4.25
1726	ATTTAGTTCACCTAA	T212C,G517GC	24.9	7.28	8.81	1.15	52.87	4.98
1727	ATTTATAAAATCTAT	T240A,C406A,C493T,C546T	57.22	3.75	3.62	4.37	28.2	2.85
1728	ATTTATAAAATTTAG	WT	58.36	10.09	3.23	2.55	23.41	2.37
1729	ATTTATATTTGGAGA	T84C,G524T,C527G,A572G	0.98	0.33	0.16	7.17	26.73	64.62
1730	ATTTATCATTCCCAG	A167G,C415G,A648T	44.68	27.5	3.78	1.72	21.3	1.02
1731	ATTTATCCTAACATA	A96T,T137A,G242A,G537A	25.33	2	1	5.5	63.5	2.67
1732	ATTTATCGAATAATC	WT	54.4	11.58	3.96	1.9	25.08	3.08
1733	ATTTATGAATCCGAT	C142A,T207C,G272T	75.97	6.09	2.88	1.6	10.26	3.2
1734	ATTTATTGTTTACTA	WT	56.39	12.16	3.83	1.73	23.95	1.93
1735	ATTTATTTCACAGTC	G342T,G353A,G362A,G422A	72.21	2.76	3.33	1.95	13.32	6.43
1736	ATTTATTTCATCAAG	G43C,C149A,C453T	51.36	14.47	4.28	2.1	26.76	1.03
1737	ATTTCAAGTTCCCTA	C278T,G381T,C530A,C577T,T605A	8.86	0	0	32.81	53.65	4.68
1738	ATTTCACAATCCGTT	C60T,C169G,GC362G	52.51	19.8	3.03	1.04	20.52	3.1
1739	ATTTCACGAAACTTT	T46C,C146A,CA159C,T162C,T267C,A494G	71.95	6.46	5.11	1.44	12.67	2.36
1740	ATTTCAGGCATTCAA	A477T	61.78	16.22	2.57	1.68	14.09	3.65
1741	ATTTCCACGACAGCA	A343T,T386C,C612A	60.4	11.96	2.31	1.8	20.75	2.79
1742	ATTTCCACGCTTATG	T116A,C145A,A296G,A383T,C602T,G636A,G639C	0.34	89.55	0.03	0.06	4.86	5.15
1743	ATTTCCCTTCTCCCG	C397A,C519T,G673T	69.7	2.76	3.53	2.82	15.61	5.57
1744	ATTTCTAATTTGTAG	C93A,A246T,T386C,G487A,A578G	59.16	8.67	5.3	1.08	23.5	2.29
1745	ATTTCTACAGTTTGT	G310A,G480A	61.42	3.74	2.81	6.41	20.73	4.89
1746	ATTTCTGTGAGTTTT	A78G,G559T,T631A	56.3	7.83	3.18	2.73	25.82	4.14
1747	ATTTGAACAGTTCTA	C363A,T498A,G538A,C596A,C637T,T655A,T688C	50.03	13.23	4.35	3.22	26.33	2.84
1748	ATTTGAATGGTCGAT	A65G,C121G,A226C,A338C	55.94	17.24	4.68	1.38	18.37	2.38
1749	ATTTGCAAATGTAGC	A118G,A160G,T274C,A285G,T347C,A590G,T692A	14.3	1.56	0.11	29.82	53.55	0.66
1750	ATTTGCCCCAAACCC	A220C,G574A	63.84	16.76	4.16	0.83	9.83	4.58
1751	ATTTGCTAATAAACC	A45G,T207G,C598T,G606A	54.21	5.54	2.89	3.64	32.7	1.02
1752	ATTTGGATTAATTGG	T39A,T174C	55.4	11.11	3.1	1.8	26.47	2.12
1753	ATTTGGCATCTGGTG	WT	61.37	10.87	3.82	1.66	19.38	2.89
1754	ATTTGGTTGAGTAAG	WT	58.32	11.09	3.96	1.81	21.74	3.08
1755	ATTTGGTTTGTTATA	G352A,C410T,A462T,A558T	51.31	16.9	7.65	0.4	21.53	2.21
1756	ATTTGTAAACAACAC	T386A,A594G,G664T	47.94	5.84	3.03	4.06	38.45	0.69
1757	ATTTGTGGCCTTTCT	G272A,G349T,C423T,C571T	67.74	1.78	2.08	7.39	19.71	1.3
1758	ATTTGTTAAGATTCA	C185G,A338G,C369T	NA	NA	NA	NA	NA	NA
1759	ATTTTAACCGCATAG	G27A,C512A,A513G,T672A	32.65	4.52	3.27	7.17	35.39	17
1760	ATTTTAACTGAGTGG	C345T,C546T,G629A	35.74	20.45	2.47	2.25	35.96	3.14
1761	ATTTTAAGAATAGCT	C28T,T638A	50.58	9.37	4.33	2.1	32.34	1.28
1762	ATTTTAAGAGGTATT	A120T,A166T,C463T	61.26	7.67	4.15	2.34	21.91	2.66
1763	ATTTTAGTTTAAAAG	C630A,T655C	55.56	12.07	5.13	1.98	23.26	1.99
1764	ATTTTATAAATCTCT	TG50T,T620C	51.01	11.55	5.41	2.34	27.78	1.92
1765	ATTTTATGATGTAGG	C114A,A371T	50.99	18.91	3.19	1.7	21	4.21
1766	ATTTTATTACGATAT	T46C,C54T,T137A,T413A,A580T,A685G	52.29	15.91	4.19	3.45	22.32	1.83
1767	ATTTTCACGGAGTTA	G51A,T528A	49.79	6.64	1.44	2.6	37.38	2.16
1768	ATTTTCATAGTGAGT	T179A	56.82	11.2	4.06	1.99	23.31	2.61
1769	ATTTTCGAGAGGAAC	G583A	56.06	14.29	3.68	0.86	22.07	3.03
1770	ATTTTCGAGTATTTT	WT	57.39	13.29	3.53	1.91	22.06	1.83
1771	ATTTTGAGCCAGGGA	C478T,G496T,G538T,T604A	56.12	6.8	3.07	4.22	25.75	4.03
1772	ATTTTGATCTGGACA	G234T,T386C	53.99	17.87	3.71	2.02	20.01	2.4
1773	ATTTTGGGGTTCCCC	T126A,G355A,T420G,T509C,T605A,T616A,G635A	26.23	21.89	1.18	3.75	45.36	1.58
1774	ATTTTTGTACACATT	WT	56.51	11.63	5	2.87	21.62	2.37
1775	ATTTTTGTTCGCACA	A547T	61.36	9.37	2.57	2.65	20.32	3.74
1776	ATTTTTTCAAATTCA	A120G,T206A	58.69	12.02	3.84	1.72	21.32	2.42
1777	CAAAAAAACCCCTTT	G51A,C129A,C145T,C497T	51.25	7.63	2.02	6.44	27.41	5.25
1778	CAAAAAGTATACCGA	T117C	60.66	11.22	4.64	2.03	19.23	2.22
1779	CAAAACAAGCAAAAG	C530T	58.37	6.86	3.84	3.68	24.53	2.73
1780	CAAAAGACTTATCAT	A118T,T293A,G304T,T419A	10.93	14.84	3.72	0.46	32.25	37.8
1781	CAAAAGTGAATTATT	WT	57.44	11.97	5.28	1.94	21.35	2.03
1782	CAAAATACTACTTTA	A443T,A475T	5.52	77.52	0.44	0.31	14.5	1.71
1783	CAAAATATTTCTGAA	G56T,T132A,G189T,T267A,T581A	70.73	4.41	4.64	2.27	16.43	1.52
1784	CAAACCCATTAATGT	A177G,T289A,G313T,C458A,T704C	2.37	75.07	0.35	0.15	20.62	1.44
1785	CAAACCTGATTCATA	G49A,C142T,T504A	12.18	2.03	0.55	13.1	66.61	5.53
1786	CAAAGGCCAGGAATT	T136A,A246T	61.1	11.14	3.91	1.4	19.03	3.4
1787	CAAATACTGTTAATT	G97T,C336T,C630A	11.85	61.32	1.65	0.52	21.81	2.85
1788	CAAATATGAGCTTTT	T126C,A219T,A224T,C400A,T409A,A663T	59.55	7.96	3.08	2.34	25.58	1.48
1789	CAAATCGGGCGAAGT	A188T,G388T	53.02	11.86	4.81	1.37	24.8	4.13
1790	CAAATGTATAATATA	C36T,G66A,T122A,G134A,C145T,A213T	51.46	4.07	2.33	1.45	38.66	2.03
1791	CAAATTAAAATGGCT	T136A,A425G,C497A,G617A	33.19	27.92	2.84	2.43	28.83	4.8
1792	CAACAGATCCTCCGA	T74A,A160T,A177G,G510A,T536C,G568A,T622A,A694T	18.6	1.93	0	18.12	60.86	0.48
1793	CAACAGGCGTAGATA	G244A,T300C,C369T,G427T,T429A,G457T,C458A	45.77	35.18	0.42	2.54	13.98	2.11
1794	CAACATAACTATCCA	C144A,G271A,A560G,G575A	29.56	0.51	0.79	5.91	11.74	51.49
1795	CAACATAAGATCAAA	G460A,C598T	26.86	43.5	2	1.56	25.13	0.95
1796	CAACATGTTTTCGTC	G377A,T389C	74.35	2.11	3.59	1.47	16.73	1.74
1797	CAACATTTAAAACAG	G87A,T347C,T508C	68.94	4.05	4.19	3.51	16.91	2.41
1798	CAACCAATAATATGG	T153C,T174C,T394C,T616C,T660C,A689G	66.65	3.2	3.08	3.39	23.08	0.61
1799	CAACCAATGTTTGAT	G30A,G370A,G377A	60.53	8.94	3.1	2.04	23.49	1.89
1800	CAACCACTACTCAGC	G72T,T201C,A285T,A653T,G690T	64.83	6.31	1.09	9.22	15.69	2.85
1801	CAACCATTGTTACCA	WT	58.49	12.78	4.24	2.62	19.4	2.48
1802	CAACCGAATAATCTG	WT	60.31	11.88	4.51	2.07	18.73	2.5
1803	CAACCGATCTATGTG	A78G,G100A,A120T,C458T,G680T	62.06	7.4	3.23	2.52	23.23	1.57
1804	CAACCTCATATCTGT	G211C,C269T,G452A,A483G,C552T	1.74	1.97	13.29	0.22	62.96	19.82
1805	CAACGATAGGTATTT	AG78A,G284A,A368G,A385G,C405T	75.79	2.84	3.47	2.84	13.11	1.96
1806	CAACGTAACGGCGTT	G32C,A167T,C175A,C237T,T386C,G584A	57.15	9.66	7.56	2.1	17.65	5.88
1807	CAACTGGAGACGTTA	C107A,TC132T,G183A,C185T,A194T,A238T,T283A,T327A,A456C,C521A,T543G,A594G	NA	NA	NA	NA	NA	NA
1808	CAACTTTCAGTCGTC	A285G,T325C,A338T,CT464C,TG553T	52.54	33.47	2.34	1.31	8.15	2.2
1809	CAACTTTCTTATTGT	A156T,G481A,A485T,A494T	40.21	20.62	1.97	2.59	27.46	7.15
1810	CAACTTTGCTCGGGT	G79T,G500T	64.9	14.12	3.85	1.69	13.58	1.85
1811	CAAGAAACTTCAGAG	A213G,T283C,T315C,G330A,T374C	38.83	9.11	6.76	1.29	41.18	2.82
1812	CAAGAATTATCAGAT	A44G,T341C,T419C,T432C,G444C,G575A,C665A	1.74	89.08	0.11	0.21	7.48	1.37
1813	CAAGATTCAGACTAT	G43A,T131A,T401A	56.28	8.5	5.67	2.03	22.68	4.85
1814	CAAGCACATTTCCAT	WT	58.75	11.82	3.03	2.1	21.69	2.61
1815	CAAGCACCCCTTCTC	C185T	66.36	15.38	0.96	0	15.38	1.92
1816	CAAGCATCTACTTGA	G76A,A101T,C119T,A338G,T465A,A578T	47.06	22.68	3.73	1.7	21.05	3.79
1817	CAAGCTATGCACCCT	G106T,T131C,AG256A,TG634T,A663T	60.55	17.43	2.84	0.99	13.73	4.46
1818	CAAGCTCTGCGCCTG	T247A,C288T,G310T,TC465T	75.97	1.33	3.58	4.39	12.48	2.25
1819	CAAGGAAATCATATG	A456T	64.44	17.05	2.47	1.37	12.9	1.78
1820	CAAGGCAAATGCGGA	AC141A	62.53	10.93	3.82	1.68	19.04	1.99
1821	CAAGGTCACTCATAT	WT	58.72	12.01	4.38	1.94	20.95	2
1822	CAAGGTTAAAGCGTG	G250T	59.58	11.67	4.58	1.47	19.98	2.72
1823	CAAGTATACTGTCTG	C34T,C178T,A263G,C522T,C627A,T655C	49.24	21.97	5.3	1.52	15.91	6.07
1824	CAAGTATTAATGGTG	G244A,T704C	56.76	6.94	5.58	1.95	25.9	2.88
1825	CAAGTCACCGGAACA	G66A,G75T,G196A,A238C,T270C,G316A,T347A,T504C	3.4	0.87	0.17	20.24	56.98	18.33
1826	CAAGTGATGGTACAA	G470A,G510A,G524A	NA	NA	NA	NA	NA	NA
1827	CAAGTTATCATCTAT	G480A,G686A	30.67	28.57	3.03	1.93	27.9	7.9
1828	CAAGTTCGCGCACAA	WT	61.21	12.48	2.88	1.95	18.59	2.87
1829	CAATACCCGTTCGTC	G422A	58.01	7.29	4.4	1.77	15.51	13.01
1830	CAATACTAACTGCAT	T267C,C530T	57.11	4.05	5.45	4.22	26.71	2.46
1831	CAATACTTATATTCA	G318A,T327C,TG347T,A428G,AC477A,A513G,G569A,C570T,C596T	NA	NA	NA	NA	NA	NA
1832	CAATAGACTACTTTA	G276A,CG376C	71.87	1.67	5.11	4.43	14.7	2.23
1833	CAATATATCATCTCT	T528A,C551T	47.07	4.18	0.5	5.2	37.02	6.03
1834	CAATATTAGGTACCG	G227T,G242A,A343G,G391A,C434T,A475G,T616C	28.07	19.24	4.02	1.12	27.52	20.02
1835	CAATATTATGAATCA	WT	57.6	10.9	4.57	1.72	22.5	2.7
1836	CAATCACATCTACAT	A96T,C110A,T325A,C435T,G635A	59.86	6.17	2.89	2.24	21.04	7.81
1837	CAATCAGCTTTAACA	T108C,C143G,T341C,G676A	67.37	3.82	3.33	3.33	19.96	2.18
1838	CAATCAGGCTTCATG	C157T,A236T,C269G,T270C,A523G,G595A	1.05	0.6	0.02	13.49	22.48	62.36
1839	CAATCCAAACCTAGT	T102A,A523G,C567G,A572G,G693A	2.07	0.63	0.16	42.44	53.89	0.81
1840	CAATGAGTAAAGTTT	A45G,A105T,T116C,T321A	54.78	21.06	3.13	0.93	17.24	2.85
1841	CAATGATTTGGGCAC	T409A,G564A,G606T	67.33	8.76	4.87	0.97	14.6	3.48
1842	CAATGCGTTGTGTTA	A44G,A156T,G235A,A238G,A343G,T394G,C665T	57.27	16.05	4.58	2.38	18.64	1.08
1843	CAATGGATGTATTGA	G395A,T622C	64.44	11.6	3.17	1.39	14.95	4.45
1844	CAATGGTTTCAGTAC	G306A,T565C	82.85	0.91	4.02	3.04	7.9	1.28
1845	CAATGTAATTGACCG	T102A,C154T	60.36	8.23	4.35	1.31	22.38	3.37
1846	CAATTATTTGTTCAA	T509A,C588T	54.97	9.56	3.59	1.59	27.88	2.4
1847	CAATTCATAATCTGG	AC156A,G353T,T373C,T498A,T536C,C600T,T610A	76.73	3.16	4.31	2.26	11.31	2.22
1848	CAATTCCGGTTTAGT	T280A,T565C	11.47	60.56	2.92	0.44	21.8	2.82
1849	CAATTGACTCCCTCT	T38C,A141G,C193A,C248A,C405T,C571A,A594G,C612A,G656T	63.5	2.39	2.66	3.36	26.65	1.43
1850	CAATTGCAGTAATCA	T137C,G192T,T206C,A547G	63.39	14.88	3.99	1.39	13.98	2.38
1851	CAATTGCTATAATAA	C77G,A236T,G352T,C412T,G422C,C467T,G484T,T613A	25.22	22.55	0.89	2.97	45.99	2.38
1852	CAATTTAGCGTGGGA	A96C	63.55	10.44	3.59	1.33	18.38	2.7
1853	CAATTTATCCATTTA	WT	56.99	11.88	4.53	1.7	23.28	1.61
1854	CAATTTCAAGTTTTG	A209G,G210A	43.59	7.03	4.75	1.45	40.9	2.28
1855	CAATTTTTGCAGGTC	T283C,C404A,C490T,T545C,G690A	64.65	2.56	1.14	6.05	24.69	0.9
1856	CAATTTTTGTTGTAT	G89A,G109A,C119T,A213T,G310T,C410T	52.26	0.9	4.5	2.7	38.74	0.9
1857	CACAAAAGCAGAAAA	T283A,T628C	4.98	54.53	1.29	0.4	35.99	2.8
1858	CACAACCCCCCCGCA	G73T,G91C,C146A,T267C,G501A,G544C,C646G,C662T	77.92	3.62	3.28	2.19	10.52	2.47
1859	CACAAGAAGTATTTA	T31C,T53C,G221T,A337C,C406T	55.16	10.58	4.43	1.88	25.98	1.96
1860	CACAAGCCGTTGTTC	T212A,T267C	3.31	3.31	17.36	0	76.02	0
1861	CACAATTGGTACCCT	T136C	64.09	12.93	3.48	1.93	15.06	2.51
1862	CACAATTTGATTCAC	C184A,A542G	58	16.01	0.44	4.76	17.31	3.47
1863	CACACATGCTCCTCT	T249C,G645A	59.49	16.78	3.23	1.76	15.81	2.92
1864	CACACTACTTCAGAC	A65C,A82G,C107T,T122C,A141T,C369T,T459C,C478G,A580G,G676A	44.2	21.95	0.85	1.27	30.18	1.55
1865	CACACTCTTGGTTTA	T179A,A226G	62.48	13.33	3.6	1.69	16.44	2.46
1866	CACACTTGACGCCGT	T137C,G676T	58.62	7.75	1.23	2.11	27.99	2.3
1867	CACAGCATCGCTTGC	T361A,A443T,C476T	5.22	83.51	0.19	0.19	10.19	0.71
1868	CACAGCTCCCCATTT	T131C,C675G	56.05	7.82	2.49	5.21	25.48	2.95
1869	CACAGGCAAGCAATA	A492T,T604C,T638A,G644A	61.15	11.51	4.08	1.6	19.19	2.47
1870	CACATAACGTGTGTG	G355A,G479A	23.5	41.55	1.02	1.34	30.35	2.24
1871	CACATAATAGCGTCA	G35A,A105T,G387T	50.88	13.17	3.78	1.8	27.39	2.97
1872	CACATACTGGAAGGT	A246G,T440A,A451G,G471A	13.87	57.37	0.85	0.68	26.37	0.85
1873	CACATAGAGGTACAG	C125A,C320T,C407T	16.47	54.97	2	0.5	21.92	4.14
1874	CACATATGAATTTTC	C624T	58.49	14.3	4.62	1.85	17.97	2.77
1875	CACATGGAAAACCGT	A69G,A334T,C577T,A594G	29.13	0.95	0.63	6.25	62.07	0.96
1876	CACATGTCCTTCTCC	A533G,T634C	61.85	13.63	4.19	1.04	15.16	4.12
1877	CACATGTGGTCGCGC	WT	62.63	9.96	3.48	2.12	19.77	2.04
1878	CACATGTTTTCTAGC	WT	55.42	12.52	5.35	1	23.03	2.68
1879	CACATTTACACCCTT	A224G,C273A,A473T,G651A,A689T	73.91	5.59	2.86	2.9	13.35	1.38
1880	CACATTTCAGATCCC	G66A,C336T,A578T,G606T	14.97	62.94	1.49	0.8	17.31	2.49
1881	CACCAGATCGAGTCT	C398T	68.74	4.14	3.56	2.44	17.73	3.39
1882	CACCATACCTATCCC	WT	58.39	12.66	4.09	2	21.36	1.5
1883	CACCATTCACTCTGA	WT	59.54	11.8	4.38	1.73	20.57	1.97
1884	CACCATTTAGACTAT	A219T,A220G,G426A,G671A	51.96	11.69	6.02	1.55	21.74	7.04
1885	CACCCAATGAATTCT	C33T,T86G,G271A,C375A,G444T	0.55	91.09	0	0.2	7.62	0.54
1886	CACCCATTTACGCTT	T179C,G180A,A209C,C265T,C295T	33.34	30.68	4	0.44	26.23	5.31
1887	CACCCTTTAATTTCA	C41T,C668A	56	12.15	4.42	2.02	23.4	2
1888	CACCGGTAGCTTTTA	T392C,C502T	66.96	16.09	4.26	1.17	10.54	0.98
1889	CACCTCATTCTTCCG	A166T,C231T,G639A,T661C	65.87	8.69	2.81	2.57	17.86	2.2
1890	CACCTCTAAATTCCT	G196A,T205C,G221T,G316A,T325A,G379A,T672A	65.32	4.57	4.57	2.14	18.3	5.08
1891	CACGAGTTGCGCAAA	G128A,A678G	68.4	7.6	2.58	2.21	16.42	2.78
1892	CACGATTCGGATCAG	T240A,G313A,G318A,T622A,G639A,A678G	23.32	42.05	1.41	1.06	30.56	1.59
1893	CACGCCACACCCGGA	T74C,T115C,T137A,T321G,A443T,G657A	4.26	87.22	0.34	0.18	6.54	1.46
1894	CACGGAGCGGCGTTG	A78C,T351A,T605C,G614A	76.1	2.82	2.74	3.23	13.13	1.96
1895	CACGGATACTATCCC	A105G,C143A,G357T,G471T,A523T	1.08	0.54	0.08	1.78	46.17	50.35
1896	CACGGCAGTACATCC	C37T,A474G	58.96	11.57	3.91	1.99	20.01	3.57
1897	CACGGGAACGACATA	G161A,G284A	64.32	8.18	5.48	1.79	17.58	2.64
1898	CACGTAAAGCCATAT	A96G,C149A,G208A,C384T,A473G,T491C,A597T,G670T	30.36	41.57	2.54	1.27	21.35	2.91
1899	CACGTACATTCCAAT	A47T,T111A,A191G,A456C	59.59	7.53	4.57	2.28	23.74	2.29
1900	CACGTACTCTCCGAT	T634A	61.56	12.78	4.25	1.81	16.49	3.11
1901	CACGTTAATTGACAT	T655C	59.56	12.55	3.16	2.05	19.76	2.91
1902	CACGTTGGGTCTACC	C511T,C649G	69.75	12.65	3.45	0.81	11.5	1.84
1903	CACTAGTGACGGTCT	T48A,C133T,G349T,C396G,G544A,T632A,G679T	45.67	7.8	2.9	2.62	38.22	2.79
1904	CACTATGTTGCTCGA	AC59A,G457A	58.18	10.74	4.6	1.94	22.32	2.21
1905	CACTATTCCATAAGA	WT	57.79	12.09	4.13	1.69	21.92	2.38
1906	CACTCAGCCAAAAGT	A202G,G271T,C493T,A597T,T631A	71.03	4.55	5.52	2.3	15.35	1.25
1907	CACTCCCGCTAACAA	WT	60.54	12.34	4.01	2	18.59	2.53
1908	CACTCGACTTGGGTA	C164A,G208T,T274C,G414A,A485C,A541T,TG581T	59.43	15.46	1.53	2.45	16.39	4.74
1909	CACTCGGACATACTG	C295T,A368C,T622A,T628C	28.42	48.22	2.38	0.66	17.95	2.37
1910	CACTGACTAGATACC	G32A,T315A,C398T	57.91	9.1	4.05	1.89	22.88	4.18
1911	CACTGCACCACACAC	A296C,G623A	0.55	88.74	0.06	0.06	9.14	1.44
1912	CACTGCTTTCTTGTC	T31C,T212C,G230C,A356T,T394C,C415T,CT464C,C482A,T616A	6.74	22.1	2.09	1.39	64.89	2.79
1913	CACTTATAACTTAGG	WT	56.63	11.99	2.51	1.95	25.11	1.82
1914	CACTTCCTGGCACTA	T137A,T186A,T212C,T283A,C307T,A337G,C668A	NA	NA	NA	NA	NA	NA
1915	CACTTTGAACGGAA	C393A,C567T,G635T,G651A	50.74	25.75	2.72	2.12	16.16	2.51
1916	CACTTTGTATATCTC	G49A,C143G,T174C,C684A	56.84	13.73	4.71	1.66	20.26	2.8
1917	CAGAAATGCTACTTA	C143A,G352T,CA384C,G448T,C476T,C490T,T516A,A541G,T562C,A580G,G593A,G676T	1.57	1.38	0	38.89	55.19	2.98
1918	CAGAATTCTGATCAT	C339A	13.98	58	1.69	0.58	22.07	3.68
1919	CAGACAATGTTCCTA	A648T	59.53	12.67	3.83	1.27	20.1	2.59
1920	CAGACAGTAATGTC	A47T,G230A,T401C,G470T,C493G,C551T,A609G,C654T	47.87	11.45	1.88	3.65	27.44	7.71
1921	CAGACGACATTACAC	G52A	60.58	13.58	3.7	1.39	16.76	4
1922	CAGACTAGTAACGTC	C143A,T270A,G629A,G645A,T660C	69.74	8.96	1.59	2.74	14.81	2.14
1923	CAGACTATTTTACTA	G72T,A358G,G695T	3.17	43.17	0	1.27	51.42	0.97
1924	CAGACTGGCTTTATT	G377A,A685T	62.94	6.37	3.82	2.26	21.34	3.28
1925	CAGAGACCGCCCGCG	WT	63.17	11.85	4.62	1.7	16.07	2.59
1926	CAGAGTACAAAGGAC	T137A,T179C,A301G,G322A,G366C,G460C	0.75	84.83	0.42	0.15	13.04	0.81
1927	CAGAGTGATACAAAG	C55T	56.73	12.61	4.48	1.72	22.44	2.01
1928	CAGATAGCAATGTA	T111G,T325A,G388A,T498C	44.42	17.27	2.74	1.89	24.63	9.05
1929	CAGATCACGCTTCAG	WT	60.26	12.13	4	1.92	19.41	2.28
1930	CAGATCCATCATTTC	A246T,A428T,TG498T	3.64	12.65	0	13.47	54.87	15.37
1931	CAGATCCGATGCTCG	G517GA	61.78	9.7	4.15	1.9	16.51	5.96
1932	CAGATGAGGACTGAT	A78T	62.97	11.8	3.79	1.84	17.99	1.6
1933	CAGATGATAACTATA	T174A,T179A,G217C,G507A,C520T,C591T,T643G,A678G,T688A	58.59	10.55	3.12	3.52	23.83	0.39
1934	CAGATGCAACATAAC	A44T	54.79	10.47	3.83	2.62	26.19	2.1
1935	CAGATTTCATCCCAA	G100A,C125T,C129T,A547G,T565A,G582A	59.32	8.52	4.51	1.35	24.36	1.93
1936	CAGATTTTAAACGCC	C393A,G573T	43.29	30.29	4.42	1.47	16.6	3.92
1937	CAGCAAACTGTAAGA	G331A,C367G,G370A,G500T	67.24	4.36	3.41	3.17	19.98	1.84
1938	CAGCAGCCTATTAAT	T545C	56.32	11.44	4.19	1.56	24.36	2.13
1939	CAGCATATGATAGTC	G481T	42.35	25.43	2.93	1.54	25.07	2.68
1940	CAGCCCGCGTATACG	G52T	57.85	12.74	4.83	1.58	20.34	2.66
1941	CAGCGATTATATAAA	C135A,A358G,G387A,T394A,A506T,C646T	1.13	65.99	0.09	0.05	28.01	4.73
1942	CAGCGCAAGTCATTC	G221T,T241C,C312T,T325C,C400A,C442T,T581C,T672A	22.56	58.7	1.63	0.72	14.97	1.4
1943	CAGCGTATCCCGTTA	T401C,C687T	62.87	5.72	3.8	3.02	22.66	1.93
1944	CAGCTAGTGTAGCCA	G32A,C63T,G239A,T240C,A263G,A506G	1.43	6.05	0.14	21.78	58.29	12.3
1945	CAGCTGGTCGTCTCC	WT	69.09	10.29	2.36	1.62	14.09	2.55
1946	CAGCTTACTACCTAC	T111A,G221A,C314A	42.57	20.81	3.89	1.55	28.84	2.34
1947	CAGCTTAGTAGGGA	G388A,GC402G,T432C	64.78	5.59	3.47	2.26	14.18	9.72
1948	CAGCTTCTGTAACTA	A147T	55.36	12.2	4.61	1.84	23.48	2.51
1949	CAGCTTTGTCAATTG	A447G	2.27	86.45	0.17	0.17	10.11	0.83
1950	CAGGACGTGTAACTC	T137C,GC433G	57.69	13.1	3.78	1.88	21.16	2.39
1951	CAGGCTAATTGACGA	A96T,A238G,C458T	66.72	7.59	4.17	2.26	17.46	1.79
1952	CAGGGGTGCACCTAA	T130C,C369A,G593T,C646T,C662T	47.59	2.13	1.24	19.97	28.4	0.66
1953	CAGGTTGTTAACCTT	C33T,G76C,G332A,C399A	84.36	0.64	2.56	4.27	7.01	1.15
1954	CAGGTTTTGAGTGTT	WT	60.62	12.35	5.02	1.54	17.83	2.63
1955	CAGTAATCTTTGCAA	G258T,G379T	68.02	2.75	5.41	2.71	15.22	5.9
1956	CAGTAGAACAATACT	C546T,T692C,G702A	13.28	1.78	0.22	17.08	67.42	0.22
1957	CAGTAGGCATATAAC	G49A,A371G,A383T,G471T,T634C	2.91	74.4	0.24	0.12	20.76	1.57
1958	CAGTCGGCGCCACTT	C159G,A236T,GC260G,C397G,T465C,G524T,T581A	0.54	0.52	0.04	4.67	9.81	84.42
1959	CAGTCGTCCCCCCAG	C512G,A663T	47.35	6.2	1.98	6.14	26.3	12.03
1960	CAGTCTCTTTTTACT	C530T	52.89	9.73	3.34	4.25	25.23	4.55
1961	CAGTCTTGGTCTCCA	G71C,T212C,GC517G,A648T	15.11	1.78	2.89	0.89	74.67	4.66
1962	CAGTGGAATTAGCAA	C33T,A78G,A141AC,G204C,A246T,T491A	65.35	9.95	4.41	1.44	17.28	1.55
1963	CAGTGTATATTTTAA	C587T	56.72	10.21	4.24	2.23	24.45	2.15
1964	CAGTGTCACTTGTAA	C287A,A462G	51.23	13.93	6.14	1	26.69	1.01
1965	CAGTGTTCCGTACAA	T386C,TG469T	50.05	11.08	2.45	2.27	29.79	4.36
1966	CAGTGTTGGGTTAGG	T122C,T389C,A408G,G457A	77.23	1.73	4.04	2.22	12.57	2.2
1967	CAGTGTTTACCAAAG	G507A,C618T	61.39	20.46	3.3	0	12.21	2.64
1968	CAGTTAATCAGTATT	G27A,T86A,T117C,C154T,G330A,C396T,T508C,G559A,T701A	44.75	4.17	5.17	4.09	36.49	5.33
1969	CAGTTATTATCGTTT	T70C,T108C	60.05	10.28	4.03	1.73	21.64	2.26
1970	CAGTTATTGTTGCCG	A214G,C290A,A475G,A483G,C659T	36.77	20.08	4.38	1.99	33.4	3.38
1971	CAGTTGAACCCGTTA	G49A,A96T,C142A,T170C,C522G,T562C	5.56	1.08	0.18	10.21	44.07	38.9
1972	CAGTTGGATTTTGTA	T351C,G426T,A477T	48.03	10.72	3.37	1.64	28.09	8.16
1973	CAGTTGTGACTTTGG	G27T,C119T,G163A	66.45	12.73	2.55	1.39	14.81	2.07
1974	CATAAACATTGCGTA	T631A,C652T	59.02	12.4	3.13	1.99	21.06	2.39
1975	CATAAATACATCGGA	WT	59.6	12.1	4.3	2.25	19.97	1.77
1976	CATAACGTCGATTTA	T240C,A263G,GC395G,T419C	66.84	5.44	3.89	2.37	18.92	2.53
1977	CATAACTATCAAGTC	A232T,G500A	55.44	21.14	4.56	1.63	15.53	1.71
1978	CATAACTGATCTAAT	T317C,C369T	60.63	9.31	3.77	2.21	21.55	2.52
1979	CATAAGTTATTTCGA	A371T	53.67	17.4	3.84	1.35	20.9	2.83
1980	CATACAGCTTCGCTC	A69G,T315C,T545G	73.2	3.82	3.13	1.54	17.22	1.09
1981	CATACATAGTTTCG	WT	65.82	15.18	2.47	1.86	11.5	3.17
1982	CATACCTGAGACGCT	A105G,C129T,T136A,G352T,G377A	65.46	2.07	4.54	2.81	24.37	0.75
1983	CATACGATGCAAATA	C571A,A572G,G644A	63.74	9.35	3.63	3.29	18.48	1.51
1984	CATACGCTCAAAGAA	G79A,C450T,C571T	73.68	2.14	3.84	4.29	14.46	1.58
1985	CATACGTGGTAAAAT	T173C,A547G	59.95	17.65	3.8	1.53	14.72	2.34
1986	CATACTTGTGCTACA	G161T,G230A,G448T,T610A	45	10.25	1.75	1.82	29.37	11.82
1987	CATAGAATGAATCTT	TG553T	64.01	16.97	2.89	0.97	11.94	3.22
1988	CATAGACTTTATCAG	G417A,G452T,A578G	61.73	11.29	4.75	2.13	17.83	2.28
1989	CATAGCACTCATCTC	A438T	49.07	16.59	4.38	2.07	20.5	7.4
1990	CATAGCGCATCCACC	G192C	59.55	11.55	3.66	2.16	20.76	2.32
1991	CATAGGCGTTTTAAA	T74C,A105G,T111A,T122C,C139A,T200C,T389A,C591G	77.5	1.28	4.28	2.78	11.51	2.65
1992	CATAGGCTTCTATAA	WT	59.56	11.41	3.78	1.75	20.88	2.62
1993	CATAGTGGTGTATAT	A338G,T613C	51.57	19.43	4.36	2.12	20.8	1.73
1994	CATAGTTTTTACTCC	G196A,CA437C,A443G,T459C,A492T,T601C,C603A,T621C,T632A	0.61	83.42	0	0.22	14.79	0.96
1995	CATATATCGAAGCGC	G250A,G331T,T419A,T432C,G480T,T638C	73.3	1.83	3.08	6.76	13.18	1.85
1996	CATATCCCTTAATTC	G537A,G629A,G651A,A663T,G690A	3.87	0	0.23	16.82	79.09	0
1997	CATATCGGTTCAAGT	C77T,C139T,A236G,G538A,T661A,T688C	55.87	8.88	4.05	2.84	26.72	1.64
1998	CATATTGGTTCGTCT	C157T,G196A,C624T,C649T,A663T	73.06	3.49	3.3	2.04	15.89	2.23
1999	CATCAAATACCATCA	C28T,C165T,G350A,A462G,G574T	80.77	0.42	4.39	3.82	9.14	1.45
[truncated: 3,792 more rows]

## Sheet: HEK293T rep2
ID	barcode	mutations	AE inclusion (%)	AE skipping (%)	first IR (%)	second IR (%)	full IR (%)	other (%)
1	AAAAAAAGCCTTTGG	T216A,G250C,T351A,T562C,T622A	75.11	0.26	6.22	1.56	15.02	1.83
2	AAAAAACCTATTTAA	G457T	61.54	6.09	6.34	3.13	21.08	1.82
3	AAAAAACTCTCAATT	A78G,C110T,T126C,A263T,T321A,CT418C,C437A,A513T,T536C,A572T,G579T	61.93	8.38	5.82	1.28	22.23	0.36
4	AAAAAATAGTCATGG	T130C,C168T,G260A,T354C,T429A,C493T,G606A	41.09	14.42	4.15	2.19	36.18	1.98
5	AAAAAGCACGTATCG	WT	66.53	7.78	5.76	1.54	16.26	2.13
6	AAAAAGGCCAGGATA	T39C,T170C,A535G	58.52	7.9	8.08	1.4	21.97	2.12
7	AAAAAGTGACCTAAA	WT	62.02	6.86	6.94	2.15	20.19	1.84
8	AAAAAGTGTAAACCT	A188T,G690A	48.24	2.64	1.32	5.29	41.85	0.66
9	AAAAATAACTCCGTT	G326A,T459A,G488C	49.28	18.36	4.27	2.24	23.99	1.86
10	AAAAATCACTGTTGT	C155T,A337G,C514T,T581TA	78.31	1.68	4.72	2.2	11.95	1.14
11	AAAAATCGCTCCAGG	T207C,A285T,A560G,C624T	20.3	0.55	1.1	10.29	24.5	43.26
12	AAAAATGATACTTAC	G190A,T200A,A238G,C527T,T539A,T545A,T621A	56.16	7.94	10.62	2.81	21.37	1.1
13	AAAAATTATTTACTA	A209G	57.45	7.32	5.69	1.89	26.29	1.35
14	AAAACACAAGGCCCG	T38G,A447G,C527T	4.59	77.59	0.2	0.39	15.83	1.39
15	AAAACACTAGGATCC	C28A,A160G,A166T,T195C,G352T,G445A,A597G	0.37	90.31	0.09	0.28	8.34	0.6
16	AAAACTTTTGTTATA	WT	59.07	6.27	6.53	2.26	23.33	2.53
17	AAAAGAACTTTATAA	A226AG,T432C	69.06	3.66	5.66	2.5	17.5	1.62
18	AAAAGAATTGACCAG	G322C	60.9	11.27	4.55	1.96	19.26	2.07
19	AAAAGACTTTAGCAC	G189A,C364T	44.56	22.6	3.84	1.28	25.16	2.56
20	AAAAGGCCGACAGTT	A120G,A268T,G352T,G480T,C589A	59.32	5.32	5.7	2.28	20.91	6.47
21	AAAAGGGGCTTTTAC	T115A,C142A,G276A,C512T,G525A,T660C	74.63	0.91	2.91	7.18	11.47	2.9
22	AAAAGTGTTGGACCA	T38C,T50A,T136C,G297T,T386A,G449A,G481A,T616C	0.5	59.13	0.07	0.28	12.75	27.27
23	AAAAGTTCTGATTCT	C520T,T545C	66.95	6.77	6.14	1.83	15.6	2.7
24	AAAATAAAGATTCAT	C119T,G686A,T704C	61.85	7.39	6.9	1.75	20.26	1.84
25	AAAATACCTAGTCTT	T386C,T413A,T446C	0.58	83.53	0	0.29	14.84	0.76
26	AAAATAGGATCGTAG	T201G	67.41	10.37	3.09	1.47	14.87	2.79
27	AAAATATAAGTTCAA	C77T,A236G,T329A,A513G	69.67	3.08	5.34	3.65	15.51	2.75
28	AAAATATTTTGGTAG	T137A,G444T,A456T,C467A,TG498T,C668G,A682T	1.92	60.58	0	0.64	30.77	6.09
29	AAAATCGGCCATGTC	C55T,T111C,C344T,A416G,C454A	53.24	12.16	6.22	2.35	24.05	1.99
30	AAAATCTATTACCTC	T137A,A141T,T162A,G239A,C363T,T386C,C467A,G554A,G617A,C624A	5.72	1.99	0	10.2	41.79	40.29
31	AAAATCTTAATCCTG	A120G,T390A	50.08	17.69	4.8	0.99	24.79	1.66
32	AAAATGCAACCATAC	T46G,C94T,T140C,G349T,C393T,A485T,G651A	52.75	17.13	4.48	2.11	20.52	3.02
33	AAAATGGTAGATGAC	G243A,C288T	77.15	1.73	3.59	1.58	13.51	2.44
34	AAAATGTCCAAGTTT	T325A,TG672T	57.98	11.91	2.25	2.69	23.37	1.8
35	AAAATGTCGGAGTGG	T70C,A203T,C262T,G388C,C437T,C552A,G584T	65.87	6.88	4.79	1.51	17.32	3.64
36	AAAATTGCAATGTCT	A177G,G349T,A368T,G457T,C571A	72.06	1.75	5.26	3.01	16.29	1.62
37	AAACAGCATGCATTA	AG220A,A385C,TG553T,G676A	66.39	17.18	4.54	0.89	9.29	1.71
38	AAACAGTATACAATA	G100T,A343G,T386A,C400A,G673A	61.21	6.41	6.41	1.37	23.69	0.91
39	AAACAGTGTGGAAAC	A65T,G346A,A477T,C502T,G505A,G651A,C684T	77.28	6.35	5.43	1.16	8.65	1.12
40	AAACAGTTGTAGGTC	A251G	64.82	5.98	6.31	1.71	19.1	2.07
41	AAACATATTTGACGA	G32A,T697A	59.82	7.24	6.7	2.39	22.44	1.4
42	AAACATCGTTGATTA	T274C,T291C,A337T,A365T,G676T	10.41	50.12	0	0.24	36.8	2.43
43	AAACCAATTGTGGGA	G230A	57.34	11.35	6.26	2.54	20.35	2.16
44	AAACCAGCCATAACT	G67A,T137C,C364G,G426C,T446C,G487T,C511T,T553A	0.6	91.24	0.03	0.03	6.63	1.47
45	AAACCCGTGATGGTA	G230T,T325C,A443T,A462G,T526C	5.77	61.21	0	0.69	29.79	2.54
46	AAACCTGCGAAAGCT	G332C,T354G,T432A,T504C,T536A	1.45	1.45	0	29.71	64.49	2.9
47	AAACGAACAAAATCG	A443G,G501T	5.97	85.24	0.85	0.23	7.26	0.45
48	AAACGAATCATTTTC	A365G,A408G,G460A	27.46	53.96	1.59	0.95	14.76	1.28
49	AAACGATAAAGGCGA	G244T,T374C,G391A,G507C,T545C,T625A	45.27	24.45	5.68	2.04	21.69	0.87
50	AAACGATTGACAGTC	G380GA	67.23	6.05	4.77	1.91	17.1	2.93
51	AAACGATTGTGAACT	G109A,C125A,T174C,T186C,T255C,T270G,G316A,A408G,G427A,CT503C,G517A,G524A,G559T,C591A,T669C	NA	NA	NA	NA	NA	NA
52	AAACGCAATTTACTA	T532C,T622A,G671A	60.16	10.3	6.66	1.89	17.5	3.49
53	AAACGGACACCTGAT	G72A,T200C,A226G,TG498T,G510A,C675G,G679C,A682G	53.8	2.9	1.67	16.63	20.87	4.13
54	AAACGGTGGGCCCAT	T543A	64.75	5.4	4.67	1.8	21.95	1.43
55	AAACGTCATAAGGTA	G104A,A105G,G109A,C159T,G196C,T666A	62.97	6.64	6.22	2.42	20.29	1.46
56	AAACGTGATCTATCG	G480T,A547C,C668A	43.05	21.47	4.66	1.57	22.88	6.36
57	AAACGTTACCTGATT	T218A,T249C,A494T	50.36	8.47	6.16	3.63	29.87	1.51
58	AAACTAATCTTGATG	G75T,T532C	68.61	6.2	5.11	1.83	14.78	3.46
59	AAACTATAATAATTC	G51A,T413A,CA442C,T610C	1.45	58.12	0	1.08	34.66	4.69
60	AAACTCGGTAAGTGT	G227A,C393A	52.19	16.76	6.59	1.48	20.11	2.87
61	AAACTCGTACTTATC	A268C,G370A	62.94	14.49	3.57	2.61	12.35	4.05
62	AAACTGACCTCCCCT	A44T,A252T,G362T,T469C,C576T,A689G,A694T	4.73	1.35	0	7.43	84.46	2.03
63	AAACTGCACTCATAA	WT	62.09	6.49	5.98	4.24	20.2	1
64	AAACTTAGGTAATTA	G76T,A167T	64.27	6.62	5.32	1.52	20.2	2.08
65	AAAGAGGGGGGGGTC	WT	65.17	7.7	5.74	1.83	16.73	2.83
66	AAAGCAAGTTTTTGA	T84C,G106T,T136A,C157T,C287T	78.28	0.83	7.18	3.16	9.14	1.41
67	AAAGCCTTACGACTG	G544A	64.02	4.88	6.87	1.81	20.61	1.8
68	AAAGCGTACATCTTC	G328A,C489T,T532A	71.02	11.86	4.85	0.99	9.99	1.29
69	AAAGCGTTCTTAAGT	A96T,G128A,A182T,T280C,CA437C,T581G,T666C	14.29	19.29	0.71	4.29	56.43	4.99
70	AAAGCTCTATCGGCG	WT	68.39	8.52	4.85	2.6	13.84	1.79
71	AAAGGACTGGTCCAT	C34T,G254C,T274A,A443T,G480A	1.34	75.89	0.15	0.74	18.45	3.43
72	AAAGGATGATGTCCG	T108C,C598T	75.42	7.09	2.8	1.79	10.64	2.27
73	AAAGGCCTTTGCCCA	A578G,C600T,C659T	66.41	8.33	5.3	1.77	15.81	2.39
74	AAAGGGGCTCATTAA	G66T,C454T,G690C	72.41	11.23	1.44	2.8	10.13	1.98
75	AAAGGTGTCTGTCCA	A214T,T413A,G593A	NA	NA	NA	NA	NA	NA
76	AAAGTATGTATACAG	T39C,T137G,G651A	67.61	6.67	4.76	2.22	15.87	2.86
77	AAAGTCACCTTCTAT	C114G,T136A,A232G,C646T	70.03	3.49	3.49	4.55	17.63	0.8
78	AAAGTCCGGCATTTG	T108C,T302C,A337G,C376A,T440C	79.25	1.7	4.02	3.4	10.35	1.27
79	AAAGTCCTTAGTTTG	G575A,T699C	63.33	8.67	7.4	1.79	14.79	4.02
80	AAAGTCTCCGCCAGG	G381A,G479A,C497T,G606T,T650G	45.76	2.12	3.39	8.27	34.74	5.73
81	AAAGTCTTTAACTGG	T29C,A141AC,T317C,T498C	65.8	1.49	4.6	2.62	24.38	1.12
82	AAAGTCTTTGCTAGT	A141T,A356T,G377T,T413A,C458A,C514A,G645A,G647A	71.82	3.18	4.4	1.82	15.55	3.23
83	AAAGTTTGTATAGCG	C138T,A181T,C312T,G480T,T536A	14.02	17.79	2.15	1.08	47.44	17.53
84	AAATAATCTTTCTAC	G98T,G575T,A641C,G656A	67.89	9.26	4.3	1.99	14.4	2.16
85	AAATACACTTCACAT	T186C,T206C,G381A,G561A	78.21	1.49	3.96	2.97	11.39	1.98
86	AAATACAGGTCACTT	C121T,C154A,C158A,C519T,T601A,T613C,G644T,A663C,A682T	43.15	1.75	1.75	5.25	47.24	0.87
87	AAATACTAAAGGATC	T207A,T291A,T302C,T317A,G645A	7.19	63.05	1.64	0.25	25.59	2.28
88	AAATACTTTATACTA	T126C,T354C,G664A	45.71	12.5	6.96	1.79	30.53	2.51
89	AAATAGAAGCTATAT	T153A,A653G	61.37	4.01	2.67	4.43	26.17	1.35
90	AAATAGCGTCTCATT	T136C,A343G,C642T	56.16	10.46	5.05	1.99	23.35	2.99
91	AAATATATAACGTAG	C145T,T321A,T498A	57.25	9.66	6.76	1.94	21.74	2.65
92	AAATATCATGGGCAA	G72A,C169A,A282G,G382T	5.54	56.41	1.15	0.38	28.3	8.22
93	AAATATCTAGCCATT	G319A,A425G,T459C,T553G	44.95	26.04	3.75	1.05	22.36	1.85
94	AAATATGAGCACTAC	A224T,G421A,G460A	4.17	77.23	0.62	0.15	16.82	1.01
95	AAATATGCGTCTTTT	A181T,G221A,G366A,A663G	45.71	9.42	4.71	1.66	34.63	3.87
96	AAATATTCATTGGTT	A299T,G584A	77.53	6.46	5.06	1.39	6.68	2.87
97	AAATCACGTCGTACA	A78T,A166G,G313A	47.43	24.21	4.17	1.57	19.58	3.04
98	AAATCACTACGCTAA	G196T	61.12	6.56	5.93	2.4	21.52	2.47
99	AAATCATTCAAATAG	G134C,C151T,T173A,G271T,C415T	45.23	19.93	6.59	1.73	26	0.52
100	AAATCCAGAAATCGG	C77A,G99T,T116A,C142T,C269T,T270C,A337G,C360A,G639A	81.27	1.69	3.96	2.43	8.89	1.75
101	AAATCCGATCTATTC	T111C,C135T,A385T,T401C,A641T	61.31	5.32	5.77	2.13	23.77	1.7
102	AAATCCTTTCCCGGT	T179C,T504C	4.22	0.63	1.09	15.47	63.61	14.98
103	AAATCTTATATGAAG	C63CT,C642T	62.56	5.81	6.08	2.07	21.74	1.75
104	AAATGACCTTTAAAT	T84C	63.47	6.22	5.98	2.41	20.15	1.78
105	AAATGAGAAGTTTGA	A252G	54.84	15.11	4.81	1.58	20.89	2.76
106	AAATGAGCTGTTGTG	WT	66.7	6.32	4.86	2.43	17.71	1.98
107	AAATGATTATAATAT	C121G,T335C,C345T	47.95	16	6.14	2.02	25.18	2.71
108	AAATGCAGTATGTTG	T504C	4.37	0.6	0.3	16.72	66.12	11.9
109	AAATGTCCTTGCTAT	G89A,A202G,T329A	70.5	3.36	4.97	3.79	15.64	1.75
110	AAATGTTTAAACGTT	A147T,A156G,T440C	60.19	6.97	4.48	4.81	21.06	2.49
111	AAATTAACTTCGTAC	A78T,C436T	63.75	6.91	5.86	2.08	17.06	4.34
112	AAATTAATACACTGG	G161A,A252T,C345T	37.9	26.63	4.45	1.13	26.81	3.06
113	AAATTACATTTTTTA	C266A	56.1	2.44	14.15	2.44	23.42	1.46
114	AAATTAGATACCTTA	T70C,T90C,T130C,A251G,C286T,T429C,C450A,C576T,G673T	58.31	13.27	4.2	2.93	15.8	5.48
115	AAATTAGTAATCAGG	G234A,T625A	49.64	15.8	4.34	1.4	26.85	1.96
116	AAATTATATGTCGTG	C143T,A166C,G192A,G310A,A451G,T586A	75.24	5.11	5.88	2.17	7.59	4.01
117	AAATTATCCTGGTGC	A96C	65.74	5.61	4.94	2.3	18.94	2.46
118	AAATTGATCATCAGT	T186C,T439A,T516C,A535T	66.23	2.17	1.3	3.9	24.68	1.73
119	AAATTGTCTGCACCT	T504A,C511T,GC517G,G614A	5.23	0.9	0.6	28.7	53.06	11.51
120	AAATTTATAATCAAA	T206C,C490A	67.42	7.47	4.89	2.49	15.89	1.84
121	AAATTTATACATTCT	T131C,A213G,G331T,T354C,C521A	75.16	3.84	7.53	1.44	11.22	0.8
122	AAATTTATTATTTGA	WT	65.69	6.9	4.36	2.36	19.6	1.09
123	AAATTTGTATTGAAA	G89T,T132C,C287A,C363T,T631A,A689G	45.2	24.34	6.25	1.31	20.53	2.37
124	AAATTTTAAAGGTCT	A202G,G461T	49.38	22.28	4.54	2.06	20.91	0.83
125	AAATTTTTATAATAA	G43T,G103A,A177C,G211A,G297C,G544C	NA	NA	NA	NA	NA	NA
126	AACAACAGCTTTTTG	A462T,C596T	67.36	8.64	5.25	2.48	15.01	1.26
127	AACAATCTAACTATA	C28T,T212C,G310T,A337G,A408G,A456G,GC510G,T516C	37.7	0.52	12.04	4.71	39.79	5.23
128	AACAATGTTTTCTCC	A425G,C436A,T632A	60.29	8.81	3.22	3.22	23.72	0.74
129	AACAATTATCAGCGG	WT	64.13	7.18	5.78	2.19	18.89	1.82
130	AACACCTTTTAAAGA	G30A,C138T,A268G,T389C,C476CA,C520T,A592G	68.16	0.7	8.45	2.36	17.87	2.47
131	AACACGCTTGGCTAC	C360T,T413A,G583A	38.2	31.54	4.97	0.88	21.15	3.26
132	AACAGACAATGGCGA	G378A	68.99	2.02	5.37	3.44	17	3.18
133	AACAGGGCTATTCC	T241A,G258T,T321G,A597G	59.2	7.32	8.21	2.26	20.39	2.61
134	AACAGGTAAGAATGG	A101G,C278A,G359A,T616C,T621C	63.35	5.72	8.57	1.18	18.82	2.36
135	AACAGTACTTTCGGC	AC156A,G221T,T335C,C552A,C640T	70.89	6.07	2.69	2.53	16.66	1.16
136	AACAGTCGACCATTA	C436T,T605A	60.38	5.57	3.26	3.78	23.23	3.78
137	AACATAAATCGGCTC	A188G,T390A,A456T,T613A,C652T	46.34	15.02	5.58	3.43	29.61	0
138	AACATAACTGTACGG	A541C,A594T	62.44	4.81	5.63	3.01	22.78	1.33
139	AACATACCGTATCCC	T90A,A251T,C286G,T291C,A475T	6.72	55.79	1.59	0.38	32.25	3.27
140	AACATACTAATGTCA	C151T,T504C,A580G	2.56	1.03	0	14.87	78.46	3.08
141	AACATATGTTCGTTG	T267A,G645A,T658C	78.14	2.7	5.38	2.28	9.71	1.78
142	AACATCAACTGACGG	G445C,T516A,T661A	1.9	1.08	0	2.17	66.93	27.92
143	AACATGTATACCAAC	T48A,C85T,A506G,T625A	2.19	2.91	0	18.76	72.5	3.64
144	AACATGTCTATTAAT	A177G,C463T	66.44	3.86	3.86	2.26	21.32	2.26
145	AACATTAGGTCTTTA	C142T,G445A,T459C,T504C,G635T	2.14	6	0.43	1.5	67.03	22.9
146	AACATTATCTTGCTC	T389A,C489T,TC586T	82.73	1.84	4.26	2.77	7.34	1.06
147	AACATTCAAATGATC	G128A,G318A,G673T	59.1	11.79	4.65	2.09	19.33	3.05
148	AACATTTAAAAGCCT	G32A,G97A,G103A,T347G,T373A,G544C	50.52	11.56	4.89	1.72	28.15	3.16
149	AACATTTGAGTTTCA	C369T	48.07	15.96	5.26	1.05	26.49	3.17
150	AACATTTTCTGGTAG	T394A	56.24	11.11	6.39	1.66	22.08	2.51
151	AACCAACGATATATC	A263G,A356T	59.81	8.99	5.26	2.95	20.41	2.58
152	AACCAATAATTCACA	T291A,G488A,C567T	4.64	63.39	0.4	0.51	26.2	4.87
153	AACCACTAGTCCTCA	C339T,G537T	18.11	41.79	2.61	0.92	33.19	3.38
154	AACCACTTTTAGAAA	T240A,C511T,C611A	71.13	5.4	5.53	1.76	14.37	1.81
155	AACCAGTTTGTAGGT	T386A,A443G,G656T	6.67	78.49	0.7	0.43	13.19	0.52
156	AACCATACCCTCTTG	C150T,G380T,T394A	66.72	7.24	5.78	1.76	13.8	4.7
157	AACCCACCTTGCATA	T46C,G183A,T274A,A296G,C463T,C618T,G635T	1.32	85.69	0.13	0.13	11.94	0.79
158	AACCCAGTGATAACT	A83G,A592G	57.68	4.12	5.35	4.56	26.05	2.23
159	AACCCCTTATGGTCC	A45T,C107T,A236G,G319A,A485T	74.25	6.21	4.78	1.52	11.31	1.93
160	AACCCTCCTTACACT	T195C,A220G,T347A,T361C,T543A,T625C,T672C	73.25	2.69	5.19	2.5	15.56	0.81
161	AACCGACCAGTTGGT	A220T	65.53	8.97	4.99	2.22	16.07	2.22
162	AACCGTAAAGAAAGT	C61A,G127A,G161A,C175A,C266T,T291A,T325G,A358G,G372A,A443T,T469A,A542G,T553C,A578G,TG581T,A663G	0.16	89.44	0	0.16	3.84	6.4
163	AACCGTTTTGTCTTT	G342A,C404T,C423T,G525A,T528G,C703T	19.54	13.74	1.01	1.13	32.03	32.55
164	AACCTAAGCCTATGG	C93T,G128A,G242A,C410A	64.42	4.5	3.61	0.9	25.9	0.67
165	AACCTAGGAGCCCAT	T116C,A166G,C184T,T241A,T335C,T392C	NA	NA	NA	NA	NA	NA
166	AACCTATATGCCTAA	G297T,T386A,C591T	0.6	77.74	0.1	0.2	20.26	1.1
167	AACCTATCTTCCAGG	TG274T,G421T,T625C	42.94	20.31	4.4	0.91	25.22	6.23
168	AACCTTAGGATAACC	A209G	62.72	4.59	4.87	1.82	23.8	2.2
169	AACCTTATACGGCGC	C411T,C423T	64.34	6.71	3.66	0.91	20.58	3.8
170	AACGACTGCTGGATA	AC156A,T247A,TG308T,C345A,T429A,T498A,C514T	68.98	9.14	7.58	1.72	11.52	1.06
171	AACGATCTGGGGAAA	A443T,A542G,T548C,T604C,T634A,G651A	6.78	74.18	0.44	1.53	15.32	1.75
172	AACGCCGAGTACCAT	WT	64.23	7.34	5.41	1.99	19.18	1.84
173	AACGGATCTAAGAGC	T108C,G123A,A160G,A213G,A263T,T361C,A416G,A456T,G524T,TC586T,G702A	1.04	0.12	0.12	7.87	9.15	81.7
174	AACGGCTTCTGCGTT	G204A,C345A	48.68	31.83	2.22	1.57	11.83	3.87
175	AACGGGAATACTCTG	T108C,A663C	58.82	2.88	3.4	2.88	30.33	1.69
176	AACGGTCCACGACAG	T327A,A358G	5.87	67.92	1.01	0.37	22.64	2.18
177	AACGGTCTCAAGTTA	T86C,C178A,A252G,T283C,G330C,T347C,T536A,G540T,C567A	NA	NA	NA	NA	NA	NA
178	AACGGTGATCTTTG	A160G,G223T	72.09	8.84	3.73	1.18	12.18	1.98
179	AACGTAGTATCTACC	A47T,C248A,G378A,C437A,G556A	68.54	4.72	11.24	1.58	11.68	2.24
180	AACGTGATAGTCGTA	T116A,T207C,T548C,G617A	70.94	7.3	4.54	1.43	13.51	2.28
181	AACGTTCAGTACGCC	C107T,A337G,T621A	76.27	2.95	4.65	2.23	12.15	1.75
182	AACGTTGTTCTTGCT	C62T,T126C,C611G,C646T	71.31	2.05	1.7	5.54	17.74	1.64
183	AACTAATTTCAATAA	G353C,A590G	68.93	2.24	4.31	2.24	20.97	1.3
184	AACTACTATTCATCC	C490A,A663T	67.34	7.14	6.21	2.49	14.73	2.1
185	AACTAGTCCTTTTGA	WT	64.4	4.92	5.93	1.69	20.33	2.72
186	AACTATCGACATTAG	T241C	61.95	6.48	5.58	1.97	21.76	2.26
187	AACTATCGTTAGGGC	G161A,A338G,C344T,A383G,G426T,G647T	37.63	15.17	2.57	1.86	27.9	14.88
188	AACTATGCTTTACAT	A177G,A213T,C687A	NA	NA	NA	NA	NA	NA
189	AACTCAAAAATGTAA	WT	62.87	5.55	6.16	2.47	21.09	1.86
190	AACTCACGTGTGCGT	C320T,T638C	28.73	32.76	5.23	0.67	30.35	2.27
191	AACTCAGGACTTGTC	C450A	65.18	5.77	5.26	1.97	17.26	4.56
192	AACTCGATTAACTA	T140A,G563A	56.01	5.92	4	3.36	29.6	1.12
193	AACTCGCAACGTCTA	C320T,G331A,GC517G,A578G,C612T,C640T	NA	NA	NA	NA	NA	NA
194	AACTCGGATACATTT	WT	62.14	6.34	5.76	2.27	21.42	2.06
195	AACTCGGTACCAGAA	T179C,C520A,C612A	53.16	3.1	4.37	6.09	30.89	2.4
196	AACTCGTATGGTCCG	G228A,G275A,G382A	47.54	11.21	9.87	1.8	21.98	7.61
197	AACTCTAAACTTTGT	T42A,G79T,G97A,G275T,T293C,T327C,A383G,C397T,C415T,T516C,TC586T,T650A,A678T	76.25	3.59	1.71	5.81	11.79	0.85
198	AACTCTCTGAATAAT	WT	62.47	5.34	5.34	2.78	21.6	2.46
199	AACTGAACTATTAAC	C164T,G445A,G693A	1.05	84.04	0	0.09	14.19	0.63
200	AACTGATTAGAAGCC	A147C,T604A,C675A	61.65	6.32	5.56	3.16	21.35	1.97
201	AACTGCCATAGGATT	G97T,G495T	62.7	7.37	4.97	3.41	18.62	2.93
202	AACTGCGCTGTATGA	A199G,A383G,G639T	66.65	8.77	6.33	1.94	14.94	1.37
203	AACTGTACGATACGA	A181G,G441C,T545A,A592T	57.55	9.93	3.84	2.03	24.37	2.27
204	AACTGTCGCTTGGAC	AC59A,AC156A,T212A,G222T,G245A,T409C,G433A,A483T,A685T	NA	NA	NA	NA	NA	NA
205	AACTGTCTCATAGTT	C37A,G80T	66.66	5.94	4.57	1.37	19.18	2.29
206	AACTGTTAACCGTCT	A44T,A101T,G113A,G381A,T622C,T632C	77.5	1.83	5.63	1.93	10.44	2.68
207	AACTGTTTAATTTTT	T247C,A560G	15.93	0.89	2.06	9.43	40.11	31.57
208	AACTTACAGATTTAA	G322A,A323G,A506T,A592T,G644T	0.81	75.95	0	0.71	18.63	3.89
209	AACTTACCAGAATCA	C700T	53.58	7.49	6.72	3.23	26.88	2.1
210	AACTTATTGCACATT	C684T	61.1	5.45	4.18	2.2	25.21	1.86
211	AACTTATTTGTATAT	WT	60.44	6.24	7.04	2.58	21.3	2.4
212	AACTTCGAAATCATC	A451G,T604G	58.51	12.01	3.65	3.04	20.36	2.43
213	AACTTCTCTGTCTAA	G75T,G510A,C615G	65.87	5.63	5.63	2.52	17.95	2.39
214	AACTTGATCTTAATA	C77T,T131A,A219T,G297A	0.94	65.91	0.39	0.47	30.87	1.42
215	AACTTGGAAACACGA	A220T,T255A,A368T	52.09	22.87	3.33	2.2	17.27	2.23
216	AAGAAACATTTAATC	G417C	62.54	5.57	5.14	3.21	21.41	2.13
217	AAGAAATCGCGCATT	T162C,G366A	57.17	13.82	5.28	1.49	18.77	3.46
218	AAGAAATTTCTTATG	T136A,C198A,T225C,C435T	67.4	4.25	5.03	2.91	15.8	4.61
219	AAGAAGTCAATAAGT	T289A,T386A,A408G,G444T,A609T,C627T,C675T,G686A	0.52	83.98	0	0.07	14.91	0.52
220	AAGACACCCAAGCAA	WT	67.77	6.28	5.06	2.07	17.03	1.79
221	AAGACCTATCAACTG	C28T,A213G,A533T	62.05	5.46	4.54	2.73	19.54	5.69
222	AAGACGGGTGGGACT	T153C,A356G,C464A,G574A,C624T,C703A	5.98	75.89	1.68	0.2	10.57	5.69
223	AAGACTGATACATTC	C62T,G128A,A416T,A425G,A477T,T532A,G555C,A578C,T625C	33.28	52.57	2.31	0.43	6.96	4.45
224	AAGACTTCCATAACG	A209G,T655C	64.49	4.33	5.5	1.58	22	2.12
225	AAGAGACTTATACAT	A88G,G695A	16.67	1.85	0.46	9.26	69.91	1.85
226	AAGAGAGATGTCGCT	T38C	63.02	6.51	6.55	2.27	19.56	2.1
227	AAGAGCAACTACGTG	WT	64.75	7.2	5.16	2.03	18.6	2.25
228	AAGAGGTGGATACGT	C642T	60.19	6.15	5.95	2.24	23.37	2.09
229	AAGAGTAGCGGGGAT	G381T,T666C	61.57	1.25	3.27	2.6	19.06	12.24
230	AAGAGTATGTATGCG	T170C,T394G,C502T	73.88	8.27	6.58	1.79	8.74	0.74
231	AAGAGTTGTTCTATT	G217A,A513T,C520T,G639A	71.78	7.17	5.66	1.46	12.82	1.1
232	AAGATAAACGTAATA	T39C,T329C,C703A	75.9	1.06	5.29	2.11	13.95	1.69
233	AAGATCCTCAACGGG	C28T,C149A,A385T,G595A,C637A,C700T	55.49	16.96	8.33	1.47	16.37	1.37
234	AAGATCTGGTAGGAA	T173C,T409C,G575A	66.44	6.91	6.58	0.99	15.13	3.96
235	AAGATGCATAGCCAT	C640T	69.86	6.91	4.03	2.4	14.71	2.09
236	AAGATGTTCTTACTT	C312T,G348T,A383G,G395C,C450T,T509C,T557C	53.28	14.65	7.36	3.09	19.5	2.12
237	AAGATTTCGGTCAAC	C41A,A443T,C454T,T638A	8.18	70.47	0.72	0.3	19.71	0.62
238	AAGATTTGTGCATGA	C159T,A252G,G328A	56.84	13.27	5.07	1.82	21.1	1.9
239	AAGCAAACAGGCCCT	C55G,T325C,G449A	36.04	36.89	2.77	2.15	18.28	3.86
240	AAGCAACTTTCAATC	C41G,G215A,T321C,T386G	58.3	3.87	3.76	1.22	30.65	2.21
241	AAGCACGTAGCAAA	A513T	72.66	11.34	3.62	1.64	9.06	1.67
242	AAGCAGAGTTAGTCG	T413A	59.86	13.32	6.04	1.95	17.46	1.37
243	AAGCAGTATGTCCCT	C28A,C124T,A199T,A296T,C320T,T565A	0.45	85.84	0.07	0.14	11.55	1.95
244	AAGCAGTGTTCTCTA	WT	67.23	6.69	5.15	1.37	17.67	1.88
245	AAGCATGCCCGCAGG	C129A,G215C,T303A	63.16	2.34	5.81	2.24	22.56	3.88
246	AAGCATTATAGATCA	G56A,A78G,T302C,A343T,G366T,T413A	54.69	14.23	5.78	1.2	21.91	2.18
247	AAGCGGAAGGAAGTT	T137A,C281A,T325A,C363T,T413A,T516C,C598T,C703T	32.51	23.2	6.46	0.95	30.22	6.65
248	AAGCGGACAGTCTTG	A285G,C662T	42.72	9.87	3.1	2.94	39.21	2.16
249	AAGCGGTCCAGATTA	T42G,A45G,A83T,C158T,A494C,G496T	54.23	6.86	6.27	5.46	22.99	4.19
250	AAGCGTGGCGTGCAT	T186A,G230A,G318T,T325C,T459C,G595A	77.33	1.19	5.36	1.59	12.93	1.61
251	AAGCGTTTTGTAAGA	T195A,T643C	66.24	7.54	5.55	1.86	15.91	2.9
252	AAGCTAATCCAGTC	A268G,C397A,C464G,G664T	76.06	2.53	6.25	1.49	7.17	6.5
253	AAGCTCGCTCACCTG	A141G,T562C,TC586T	65.19	13.59	3.81	1.38	12.98	3.05
254	AAGCTCTTCAGGGAT	C406T,G500T,C514T	73.94	6.19	7.52	1.6	9.21	1.54
255	AAGCTCTTTATTTCC	A246G,C345A,A485C,T539G,A641G	32.67	26.73	0.99	0.99	37.62	0.99
256	AAGCTTTTCATTATC	C37T,C41A,T136A,A252G,G452A,T586C,C649T	51.14	9.98	6.86	2.91	27.02	2.08
257	AAGGACAGTTTTTTC	T117C,C265T,A285T,G457A,G479A,A506T,A590T,C627T,T632C	3.38	31.7	0	16.05	37.23	11.65
258	AAGGAGTGACTGATG	T90A,T173A,G370A	61.06	10.46	4.88	2.52	19.35	1.74
259	AAGGATATATCGTTG	G264C,T465C	71.55	2.23	6.9	3.38	14.43	1.5
260	AAGGCGGATGGACAG	C41T,G331A,G353C,G555T,G569A,T622C,G656A	67.5	0.27	2.76	2.76	9.05	17.66
261	AAGGCGGGGGCAGTA	T136C,A181T,C511T	67.25	7.02	8.48	1.02	14.91	1.32
262	AAGGGCTTAAGTGCG	A26T,T38C,G187A,TA218T,T440C	66.68	7.05	3.2	0.64	20.51	1.91
263	AAGGGTAATCACATA	G233T,T293C,G322A,A694T	15.21	6.23	0.5	8.48	68.32	1.25
264	AAGGTAAACAACCCC	T329C,C497A,T643C	80.05	1.19	4.24	3.44	7.77	3.3
265	AAGGTCTACAAGGCT	A156G,G215A,C407T,A535G,A592T	44.04	2.98	4.97	2.98	42.38	2.66
266	AAGGTCTTTACGATC	A428G	34.85	42.23	2.84	0.95	18.56	0.57
267	AAGGTGAAACGTCGT	T115C	71.42	5.75	4.84	1.81	14.1	2.08
268	AAGGTGGAATGGGAG	TG70T,T562C	67.75	8.11	5.1	1.8	14.66	2.59
269	AAGGTGTCCAAAGTC	C62T,T102A,G113A,A118T,T140C,G230A,A425T,C503A,T504G	8.05	0.82	0.1	14.1	30.82	46.12
270	AAGGTTTATATTAAG	T153C,C157A,A356G	7.91	65.65	2.83	0.9	20	2.71
271	AAGTAATATTCACAG	T29A,C478G,G676A	61.51	7.15	5.26	2.56	22.36	1.15
272	AAGTAATCTATTATG	G91A,T117C,A268G,G500A,TG581T,T605C,G614A	72.34	6.96	4.84	2.71	11.02	2.12
273	AAGTACGTATTTAAG	T31A,A78G,C92A,C135T,A456C,A483G,A547T,T631A,G664A	72	2.2	4.56	3.93	10.37	6.93
274	AAGTACTAGATGGTG	T122A,C150T,G496A,A506G,T616C	0.93	5.82	0.23	28.91	47.32	16.78
275	AAGTATACATATAGG	A494T,G569C	62.02	6.95	6.91	2.91	19.07	2.15
276	AAGTATCACGGGCTG	T704G	70.26	6.49	4.85	2.21	13.82	2.37
277	AAGTATGACATATTC	T283C,A338T,C398T,C410T,A451T	69.23	2.02	6.28	2.63	14.78	5.06
278	AAGTATTAAATATAT	T293C	67.56	3.58	5.59	2.66	19.07	1.55
279	AAGTCAAAGGCGTTT	A78G,C124A,T126A,T586C,T616C,T701A	64.26	5.26	5.83	2.18	20.78	1.68
280	AAGTCACTATGTTGT	G674A	65.2	6.4	5.43	1.88	18.62	2.47
281	AAGTCAGACCACTGT	T53C,A263T,A451T,C652T,G664A	63.47	4.7	6.81	2.01	21.01	2.01
282	AAGTCAGAGACAGCC	T543A	64.13	6.89	4.76	2.09	20.15	1.98
283	AAGTCAGAGGCCTGG	C64T,AG220A,G328A	55.1	12.5	4.28	1.71	24.86	1.55
284	AAGTCCAACAATTCA	T122C,T420C,CA571C	77.7	8	2.3	1.8	5.8	4.4
285	AAGTCCACATTACGT	A47T,G91A,G460T,T628C,A648T,T672A	39.33	23.34	6.79	2.01	27.75	0.78
286	AAGTCCTCGGAGGTC	A246T,T277C,C450T	72.62	3.81	7.88	1.36	11.16	3.17
287	AAGTCCTTATATGCG	A191C,G352T	68.25	1.69	5.7	2.63	20.15	1.58
288	AAGTCGAAACCGAGT	T31G,C530T	65.59	4.45	3.37	3.1	19.98	3.5
289	AAGTCGAATGAATAT	T126C,T173C,T661A,A678G	64.91	3.66	2.28	4	22.86	2.28
290	AAGTCGCAGCGCGGA	A365T,C376T	31.42	37.63	4.01	1.16	22.78	3.01
291	AAGTCTCCCAGCAAG	T162C,A181G,G211A,G318T,C512T,G623A,G664A	NA	NA	NA	NA	NA	NA
292	AAGTCTCGCTGCCAA	C158T,A219C,C231G,T241A,C442T	26.12	49.99	3.17	1.12	17.74	1.86
293	AAGTCTTATGTGGCT	C400A	62.18	4.82	5.31	2.45	23.69	1.54
294	AAGTGAAGGAATATT	G276A	75.76	1.58	6.85	2.92	11.25	1.65
295	AAGTGCGCAAAATTA	C64CA,A199T,T548C,A663T,C675T	67.5	6.63	5.27	2.01	16.87	1.72
296	AAGTGGAAAGTGGTT	A45T,T216A,T303C	75.08	1.71	4.27	2.42	14.24	2.27
297	AAGTGGTCTAAAAAA	C34A,A338T,A408T,T548C,G639A	59.35	13.33	6.24	1.2	15.43	4.45
298	AAGTGTTACTGGATT	C41T,A78G,T108C,T137C,T293A,T335A,C400A	2.38	40.79	1.98	0.4	43.56	10.9
299	AAGTGTTGCATTGAA	G56A,C85T,A188G,G353A,G357T,G500T,A535G,T536A,C612A,T634C	64.12	2.35	4.51	1.57	27.06	0.4
300	AAGTTAAAGATCAT	G540A,A648G	30.17	2.09	1.9	7.59	56.92	1.33
301	AAGTTACTAGATAAT	WT	60.75	6.83	5.8	1.66	23.14	1.83
302	AAGTTAGTAAGTAAT	C28T,T116C,A219T,T308A,C360A,G370A,A443T	6.56	68.48	0.43	0.43	23.39	0.71
303	AAGTTATAGGCGACT	T153A,G372A,G585A	61.83	17.98	3.84	1.6	10.67	4.08
304	AAGTTCACTCATTAC	C138T,G599A	62.64	7.39	5.78	2.21	19.86	2.13
305	AAGTTCTTATGATCG	G486A,G501A	63.14	7.15	6.85	1.71	14.4	6.75
306	AAGTTGTCCGCTACT	WT	66.23	7.49	4.49	2.08	17.78	1.93
307	AAGTTTACTTTGATG	C33T,A83G,A105T,T136A,A152T,C231T,T283C,T516A,T562A,G569A,C570T,C665T	2.48	0	0.31	5.9	83.23	8.07
308	AAGTTTAGCGATTTC	G305A,C571T	69.51	0.44	4.76	5.36	19.36	0.57
309	AAGTTTGCATTGTAG	G104T,T504C	5.58	0.4	0.4	10.78	70.46	12.38
310	AATAAAAAAAGTACG	T115C,A578G,T699A	67.43	8.54	5.83	1.97	13.04	3.2
311	AATAAAAAACGTTCG	G221A,G353A	77.19	0.69	4.23	3.65	13.66	0.57
312	AATAAAAGGATACAA	WT	63.57	6.78	6.19	1.79	19.79	1.89
313	AATAAACCAAGCATA	G264T,A477G,T661C	78.72	2.79	2.58	2.15	12.69	1.07
314	AATAAAGTTATAGAT	C107A,T162C,G272A,T321C,A447T,T536A,T543C,C630A,A689G	24.06	36.8	1.49	9.96	12.13	15.55
315	AATAAATATTTAAAA	C292A	12.29	50.82	1.21	0.43	32.82	2.43
316	AATAAGCAAAATCTC	A334G,A356G,G574A,G686A	8.48	71.06	1.5	0	13.97	5
317	AATAAGGACACTTTC	T117A,G128A,T321A,A383G,A385G,A641G	47.59	25.04	5.26	0.88	19.2	2.03
318	AATAATATTTTTTCA	A26T,A188C,T195C,T386C,G569A	63.37	5.52	7.26	3.49	18.89	1.47
319	AATAATCAGTGATAC	T117C,T186C,C339T,T650C	22.48	36.7	0.92	0.46	36.24	3.21
320	AATAATCCCTACTAG	C34T,T333C	69.43	1.62	7.28	3.72	16.83	1.12
321	AATAATTAGTCACTC	A213T,A252T,A268G,G311A,T386C,A447G,C455T,C511A,A513G,G534C,T699C	21.59	22.03	3.08	1.76	47.14	4.4
322	AATAATTTGATGTCA	T53A,G72A,T329A,T666C	78.47	2.24	1.41	5.33	11.35	1.2
323	AATAATTTGGTCATC	T491C,T634C	61.94	6.3	4.64	2.5	20.33	4.29
324	AATAATTTGTGCGAT	T126C,T162A,T186C,G258T,G328A,C400T,T666A	61.63	7.03	7.03	3.78	16.22	4.32
325	AATAATTTTCATCTG	T565C	64.51	7.06	6.31	2.23	17.52	2.37
326	AATACAGTGGTCCGG	A425T,C521T,C522T,T610C	70.1	3.22	4.06	2.58	18.04	2
327	AATACATTCGAAATA	G109C,T317A,T420C,A494G	67.31	3.26	6.16	2.41	19.04	1.84
328	AATACCTAAATAGAT	C178G,G192A,A246G,T303C,G353A,C393G,T526A,T696C	NA	NA	NA	NA	NA	NA
329	AATACGAGATATCGA	G211A,C287A,G306C,T351C,G388C,T420C,G569C	1.63	0.81	28.54	0	54.08	14.94
330	AATACGAGCATCAGT	A83G,A246T,G298A,T315C,A560T,T672C,A681G	31.07	26.81	2.57	1.69	35.26	2.59
331	AATACGAGGGCTGCA	C324T,C454T	37.89	30.04	3.75	0.68	26.63	1.02
332	AATACGCAAATTAAT	WT	64.58	5.12	5.44	2.4	20.29	2.17
333	AATACGTCTCGCATT	T195A,T241A,A356G	8.08	69.95	1.55	0.61	17.1	2.7
334	AATACTACACCACTT	A118G,A147T,T173C,A220G,G318A,T658C	57.54	9.32	4.38	3.01	22.19	3.56
335	AATACTACTCGAACG	G73A,C363A,A385G,G480T	34.76	35.95	1.27	1.61	13.51	12.89
336	AATACTGATGCACAA	G79A,C145G,T498A,T605C	69.82	8.58	3.9	1.83	12.49	3.37
337	AATACTGCATTACTT	WT	62.71	6.53	5.51	2.19	21.23	1.83
338	AATACTTATGGTCTT	G100T,T241C,T509C	60.45	5.05	4.69	3.17	22.77	3.87
339	AATAGAACCAAAATA	WT	64.75	6.95	5.26	2.11	19.37	1.55
340	AATAGGCGAATGACA	G430A,G656A	38.06	21.39	3.73	1.99	33.58	1.25
341	AATAGGGTTAAATCT	C158T,A177T,A682T,T688A,G693A	49.26	5.42	7.88	3.94	32.52	0.99
342	AATAGGTAATAAAAT	A69G,C119A,C404T,C437T,T459C,G651T,A678G	53.25	3.9	3.9	3.57	33.12	2.27
343	AATAGGTACCGCTTT	WT	65.97	6.88	5.28	2.59	17.05	2.23
344	AATAGTACAAAGCTA	C178T,T207C,A209G,G322A,A533C	NA	NA	NA	NA	NA	NA
345	AATAGTACTCCCCAC	WT	67.18	6.4	5.43	2.26	16.8	1.94
346	AATAGTATGCGTATG	A220G,G484T,T628A	59.19	5.41	8.11	2.43	24.05	0.81
347	AATAGTCTATGAATT	WT	61.78	5.93	5.48	2.33	22.7	1.78
348	AATAGTGCCGTATCG	T53C,C61A,G97T,T179A,G210A,A494G,A533T	56.17	7.12	11.24	3	17.23	5.24
349	AATATAAAAGTATGT	T70C,T283C,A443G,G538A	5.83	76.27	0.45	0.32	15.98	1.15
350	AATATAATATCCCTG	G244T,G259A,A572C	67.29	4.47	6.34	2.11	17.62	2.17
351	AATATAATTAACTGA	T108A,T162A,G183A,G259A,T347C,G388A,C442T,G623A	NA	NA	NA	NA	NA	NA
352	AATATACTACGTACA	WT	62.11	6.78	6.08	2.13	20.73	2.15
353	AATATAGATGATGTA	A219T,A663T	63.13	2.89	3.13	3.86	24.33	2.65
354	AATATAGCTAACATG	C85A,C121T,C248T,T354A,C530A,G690T,T701A	37.46	0	0.57	17.58	36.31	8.07
355	AATATAGCTCGCACT	G426T	47.87	11.64	5.01	2.1	21.35	12.04
356	AATATAGTCCCCTAC	G183A,T469A	54.1	16.39	4.1	1.64	22.13	1.63
357	AATATATGGTACTCG	C142A,C248A,A523G,G702T	2.13	0.29	0.07	12.83	43.85	40.83
358	AATATATTAAGAGCT	G27A,G98T,T102A,A282G,T557A,G606A,T632C	8.54	55.03	3.03	0.57	29.04	3.79
359	AATATCAATATTAGG	WT	63.11	6.19	5.79	2.44	20.56	1.91
360	AATATCATCTAATTA	A65G,C519T	60.45	3.9	4.16	2.69	25.59	3.2
361	AATATCCTTGAACAG	A285G,G500A,C615T	45.42	23.82	4.94	1.64	22.81	1.36
362	AATATCTTTTAACGT	T249A,C314T,A337C,G370T,G449A,G505A,T543C,C652T	0.8	89.68	0.2	0.06	7.32	1.93
363	AATATGCACGTACGT	T108C,T122C,G470A,G656A	45.33	12.07	3.53	3.65	32.81	2.61
364	AATATTATAAAAGAT	T401C,T429A,A506G,C598T	1.63	5.29	0	22.81	64.36	5.91
365	AATATTATAGGGACT	A96G,T270C,A296T,G319C,G353A,G529A	0.77	54.21	0.94	0.15	41.44	2.49
366	AATATTCCAAACTTC	T516C,G651A	64.94	5.26	4.76	2.17	20.2	2.66
367	AATATTCGGTCTTTT	A232G,G674A	67.62	5.7	6.93	2.47	15.32	1.96
368	AATATTCTTAATAAA	C133T,C393G	56.65	9.25	5.5	2.03	23.41	3.17
369	AATATTCTTTAGGGA	G75A,G210T,C266A,G326A,A368G,C442A,A443G	4.47	58.65	1.12	0	34.64	1.12
370	AATATTTAATAGGAG	A69G,G331A,T562A,C630T	68.03	0.77	6.42	2.31	20.53	1.93
371	AATATTTGGTGGAA	AC59A,G517A	66.13	13.41	2.9	2.17	14.13	1.26
372	AATCAAACTACCTTG	C33G,C36T,G444A	2.53	88.39	0.12	0.25	8.06	0.66
373	AATCAACCGTGAGAA	C598T,C630T	60.87	8.18	5.51	2.59	21.56	1.29
374	AATCAAGTTTTAATC	T173C,T321C	72.46	2.61	4.64	3.63	15.43	1.23
375	AATCAATCGTATCAG	G97A,G123A,A194G,A368G,AC462A	62.77	9.61	3.73	2.89	18.31	2.69
376	AATCAATTAATGTGG	T504C,GC569G,C596A,A648G,T661C,A667T	5.6	0.4	0.4	16.4	65.2	12
377	AATCAATTTTTCTAT	T335A,T562A	56.45	6.88	5.41	2.09	27.71	1.46
378	AATCACCTAACGGAA	T140C	62.73	6.3	5.7	2.36	20.85	2.06
379	AATCACTTAACGTCG	T270A	69.59	5.21	3.2	3.29	17.53	1.18
380	AATCAGAAATCGTAT	T491A	66.48	6.27	5.27	2.47	18.5	1
381	AATCAGTGAACAAAT	C143A,G244A,TC586T,T650C	68	3.77	2.26	4.64	19.07	2.26
382	AATCATAATTTAAAG	G113A,C612T	63.71	6.91	4.25	3.65	20.13	1.33
383	AATCATTGAGTTTGT	A224G,T249G,T601A	65.56	5.54	4.82	2.25	20.32	1.52
384	AATCCATTCATATAT	T116A,A147G,G322T,C503G,T620G,A667G	13.92	10.14	0.79	4.38	56.06	14.72
385	AATCCATTCCCGCGT	T102C,C142G,T562A,G606A	68.88	4.06	4.6	2.17	18.68	1.62
386	AATCCGCGACTATTA	G260A,G370T,A408T,T613C	19.78	47.65	3.37	1.12	26.3	1.78
387	AATCCGCGTTCAGTA	WT	68.1	6.53	4.44	2.22	16.29	2.42
388	AATCCGTATATAATT	T130A,G272A,G340A,A592T,G614A,A694G	23.38	1.3	0.32	31.82	42.53	0.65
389	AATCCTCAAATATAT	A188G,A358T,T516A,G566A	1.81	0.26	0	7.24	79.59	11.11
390	AATCCTCCACCTTCC	G534A	68.69	5.48	2.99	2.5	17.28	3.07
391	AATCCTCCAGCTGA	A78G,G569A	70.91	10.48	3.68	1.84	9.83	3.26
392	AATCCTTATCCCCAA	C55A,G510A	66.97	6.08	7.11	2.82	15.34	1.68
393	AATCCTTGTCTCTAC	C125A,G402T,T498C,C662T	29.76	2.59	1.23	4.45	59.02	2.95
394	AATCGACTTTATTTC	A105T,A160T,G230A	56.05	6.71	8.05	1.34	26.17	1.68
395	AATCGATGATACTAT	A365T,A438G,G564A	46.53	23.23	5.74	1.22	20.14	3.13
396	AATCGCCATTTAAGT	G95T,C149A,A182T,A203G,G228T,T409A,C665T	38.35	8.27	2.26	2.26	43.61	5.25
397	AATCGCTTCATGGAA	C364A,C397G,GC517G,T625G,G635T	48.82	1.06	1.34	10.2	32.78	5.8
398	AATCGGACGATGCCA	AC59A,C93T,T131A,A167T,T321A,G353A,C398T,C530A,A542G,C570T,A590G,G617T	9.23	0.45	0.92	39.69	46.76	2.95
399	AATCGTAATAATACT	A226T,A232G,G272A,C287A,G531A,T565C	79.09	0.82	6.05	4.9	6.84	2.3
400	AATCGTACATTTTAA	G91T,C287A,G554T,G568A,C687T	55.55	2.15	4.07	2.49	23.31	12.44
401	AATCGTCATTCGACC	C164T,G196C,T586G,T631C	72.43	4.27	3.55	2.84	15.16	1.75
402	AATCGTTCAATATAA	C36G,T102C,A224G,C467T	31.29	45.85	3	1.32	17.21	1.32
403	AATCTAAGATGGGGG	A44G,A65T,T117G,A263G,T389C,C410A,C418G,G599T,T616C,T620A,C640T,C668G	68.42	10.45	1.37	3.51	11.9	4.35
404	AATCTAATAGGATGG	WT	64.72	5.96	6.46	1.92	18.8	2.14
405	AATCTACTTAGCCTT	A82G,T130C,C139T,T270A,A337G,T361A,C453G,T469C,A533G,G633A,G670A	51.47	23.42	2.43	2.84	19.13	0.7
406	AATCTAGCACTCGGA	A47T	57.92	7.63	6.57	2.02	23.87	1.97
407	AATCTAGTAATTTAA	G80T	63.79	7.23	4.51	2.87	19.52	2.09
408	AATCTATTTAGCATA	T173C	61.66	6.73	5.53	2.32	22.13	1.63
409	AATCTCATACGCGTA	A285G,G377A	59.48	8.68	5	1.84	22.11	2.89
410	AATCTGACTGTTTGA	G636A	63.47	9.72	6.58	1.62	15.68	2.93
411	AATCTTATCTTACTA	C85A,A120G	60.02	7.46	6.05	2.45	21.84	2.19
412	AATCTTATTACCCTA	T241C,A456T,T622A	64.85	6.05	5.19	2.6	20.17	1.15
413	AATCTTATTTCCTAG	T545A	61.96	6.58	5.75	2.41	21.22	2.09
414	AATCTTCAACAAGTG	G313A,G457T,A494G,T548C	49.45	19.62	6.58	0.61	20.1	3.64
415	AATCTTCCGAAGCTC	T516C,A523T,G599T	1.87	0.37	0	6.48	24.41	66.87
416	AATCTTCTAATTAAT	T90C,G346A	69.74	4.48	4.87	2.41	15.67	2.83
417	AATCTTGTTCAAACA	A78T,T162C,A166G,G417A	70.22	6.36	4.12	2.47	15.29	1.54
418	AATGAATGTCAAGTT	T140G,A194G,G229T,C339T,G362A,CT468C,T553A,T638A,T650C	5	41.7	0.64	0.85	48.72	3.09
419	AATGACAGGTGCCAT	G75A,A120G,T389C,C642T	67.58	3.08	5.87	2.8	18.7	1.97
420	AATGACGCAGCTTGT	A88T,C324T,T553A,C577T,T616C,G647A	33.98	7.15	3.25	3.9	50.22	1.51
421	AATGAGAGCGCGGGG	T335C,T632C	68.31	6.31	5.99	1.89	14.19	3.31
422	AATGATATCGTCATG	G595T	66.38	6.96	6.22	2.01	16.19	2.23
423	AATGATGCATCTAGT	T315A,C503A,C518T,T526C,C612A	15.74	2.25	0.41	13.49	56.84	11.26
424	AATGCACCTAAATTT	G484C,C637T,C654T,G674A,A681G	57.14	6.61	4.41	2.55	26.9	2.38
425	AATGCATTTTTAACT	C41T	58.46	6.23	6.65	3.23	23.13	2.3
426	AATGCCGCCATGGGT	C36T,T672C	72.88	9.25	3.13	1.5	10	3.25
427	AATGCCTTCTAATGG	A188T,C312A,C468T,G544A,T643A,T650A	55.71	4.11	4.11	1.83	32.88	1.36
428	AATGCGAATACATAT	T401C,G414A,T610C,G691A	8.59	0.68	0	18.55	72.17	0
429	AATGCGGCTAAATGA	C175T,C466T	49.56	9.29	4.86	3.54	27.88	4.87
430	AATGCGGGGGGCGCA	T137C,C154A,A171G,T392C,A473T,T553C,T621C,T672C,T697C	74.43	5.99	2.46	2.81	13.38	0.93
431	AATGCTTGAGATGAT	A203T,C698T	64.69	6.69	5.97	1.96	18.61	2.07
432	AATGGAAATGTCAAT	G644A,C675G	67.43	5.79	3.77	2.79	17.44	2.8
433	AATGGAGGATTTACA	A105G,A246T	58.85	6.23	6.66	2.07	23.92	2.28
434	AATGGGCGAGTTAAT	G113A,A560G,A681G	21.36	0.14	0.28	18.45	26.21	33.56
435	AATGGGGCTATAACT	C107A,C612A,T620C	62.5	5.2	5.94	2.96	21.5	1.9
436	AATGGGTGGGGGTTG	T173G,T394C	72.88	2.18	7.42	2.68	13.97	0.86
437	AATGGTACGGGAGCT	G391A,T504C,T539C,T605A	1.81	0.4	0.2	13.25	76.1	8.23
438	AATGGTATTTATGCT	T126C,G357A	56.55	9.23	5.71	2.09	23.91	2.5
439	AATGGTCAAGACAGT	C60G,T116G,A118G,T131A,G183T,A578T,C589T,T613A	64.25	3.7	4.19	2.9	21.26	3.7
440	AATGGTCCTGACCCA	G353A	84.56	0.48	2.56	3.52	7.83	1.04
441	AATGGTTTATTCCGT	A44T,G49C,A69G,T140A,T341C,G362A,A383G,G569A	73.48	3.6	6.44	2.06	13.64	0.78
442	AATGTAAGAGACCTA	G99T,T206A,A251T,G258A,G350A,A368G,A425G,G651A,T669C,A678T,A682T	71.01	0.58	5.17	3.8	17.06	2.38
443	AATGTACATGGAGCT	G99T,A213T,T225C,T283A,T291C,T317C	0.69	37.49	8.34	0.69	45.83	6.95
444	AATGTAGCACTTCG	G564A	69.83	11.73	4.13	1.34	9.01	3.96
445	AATGTCCCAATCACC	A65G,C552G,C675T	70.4	6.77	4.86	1.67	14.57	1.74
446	AATGTCCCTGTGCAT	C55T	64.14	4.76	4.13	1.9	22.22	2.85
447	AATGTCTCTATGGCA	C41A,A45G,A213T,T303A,C434T,C520A	NA	NA	NA	NA	NA	NA
448	AATGTGCTACATCTA	A47G,A182G,C497G,C618T	49.28	5.26	5.26	6.7	28.47	5.03
449	AATGTGTGTCTGCTA	G73A,GA100G,T225A,C369T,A523T,G677A	1.3	0.32	0.16	5.29	24.74	68.18
450	AATGTTACATTAAAC	TG111T,A181G,T516C,C624T,T704C	64.97	7.41	5.98	1.42	17.38	2.83
451	AATGTTCCGACATCA	WT	66.99	7.08	4.48	2.17	16.64	2.65
452	AATGTTCCGGATTAA	A323G	39.57	22.14	5.26	0.91	28.31	3.81
453	AATGTTGCAGGCGAT	A253C,A358G	5.04	74.85	1	0.18	16.52	2.41
454	AATTAAAACAATCGC	AC59A,G73A,A191T,A199G,G319A	64.31	6.4	6.13	2.52	17.84	2.79
455	AATTAAAATTGCCCA	G313T,G644A	36.29	25.93	4.32	0.94	29.52	3
456	AATTAAATTCCAAA	TG102T	69.66	8.5	4.87	1.92	12.63	2.42
457	AATTAACCAGCTTCG	T195C	67.41	8.33	4.24	2.07	15.76	2.19
458	AATTAAGCATCTAAC	T31G	53.64	8.86	8.69	2.25	24.98	1.58
459	AATTAATAATGTGTG	G104A,C169A,T249C,G305A,G362A,C369T,T553A,T660A	62.68	3.64	3.64	3.8	24.13	2.12
460	AATTAATTCGAAAAA	T50C,A203G,T249C,A578G	57.01	9.61	6.7	2.28	22.44	1.97
461	AATTACATACCATCC	WT	56.49	6.48	7.64	3.94	24.07	1.39
462	AATTACCAAAAACCG	C41T,T140C,C197T,A682G	64.12	4.58	4.58	5.34	18.32	3.05
463	AATTACCCAATCAGA	C61T,A365T,C514T,G679T	58.58	25.1	5.73	0.73	7.93	1.93
464	AATTACCTGCATACG	A492T,T601C	59.03	4.78	7.29	3.64	23.62	1.64
465	AATTACGTCAGATCG	C125A,T386C	70.12	3.76	6.08	2.15	15.56	2.34
466	AATTAGAAGCAGCAC	C155A,G217A,G322A,C434T,G510A	36.29	26.54	3.47	0.96	20.95	11.78
467	AATTAGGCAATCCTT	T666A	65.47	7.6	5.8	2.32	16.88	1.94
468	AATTATGTGGTGTGG	T274A,G319A,G346C	72.32	4.51	5.26	2.63	14.01	1.28
469	AATTATTTCTTGCGT	T140A,G346A,G387A,T413A	52.7	18.96	3.94	2.47	18.96	2.97
470	AATTCACATTGTACA	T136C,C411A,T632C,A689T	78.38	1.89	4.63	1.93	11.49	1.69
471	AATTCACGGCGCAAT	C404A	66.92	3.5	4.45	3.18	20.68	1.27
472	AATTCACTGCGTTTT	A202T	67.49	5.42	3.84	2.45	19.76	1.04
473	AATTCATCGGAAGTT	G243T,G346T	69.64	2.57	4.47	2.17	19.11	2.04
474	AATTCCCCTAGACGG	G217A,T308C,C497T	67.8	0.31	3.7	10.22	14.1	3.88
475	AATTCCGCAGTGTCT	C129T,G189T,T351A,T361C	79.87	0.69	4.55	3.35	9.63	1.91
476	AATTCGAGTAAACCT	C33T,G227A,T329A,A338G,G388A,A438G,C591A	57.18	5.19	5.01	2.6	25.49	4.54
477	AATTCGTAAAGTGTA	G426T,G555A,C665A	48.54	13.42	5.14	1.22	17.87	13.8
478	AATTCGTTAGTGTCG	A365G,G448A,G510A,G683A,T704C	76.07	0.94	8.29	2.53	10.76	1.41
479	AATTCTAGTGGTATG	A282T,G319T,A338T,T354A,A385G,G391C,G426T	45.6	10.28	5.42	2.16	23.08	13.47
480	AATTCTTCAAATTAA	A268T,T386C,T419A,G472A	64.26	2.4	6.66	0.53	23.73	2.4
481	AATTCTTTTCAAACT	T122A,C159T,G318T,G366A,C412T,A549G	60.81	6.7	2.58	0.52	26.8	2.59
482	AATTCTTTTCTGGCA	A188G,A251T,C570T	49.99	2.61	6.09	2.61	35.65	3.04
483	AATTGAATCTTAGTT	WT	63.91	7.06	4.82	2.63	19.17	2.41
484	AATTGACGTTATTAT	WT	63.79	8.33	5.11	2.1	18.63	2.04
485	AATTGACTTAATAGC	A78T,C110T,C144G,G306A,G471T,C520A	67.9	0.81	1.99	9.35	18.71	1.24
486	AATTGAGTTTCAACC	WT	65.3	6.6	6.44	2.2	17.5	1.97
487	AATTGCATCTTTGAT	A59T,T179C,G362C,G554A	8.8	3.41	0.65	6.43	32.94	47.76
488	AATTGCATTTTACCA	A301G	61.29	7.21	6.53	3.08	20.71	1.19
489	AATTGGACAACGCTT	TG581T,C700G	68.01	8.1	3.65	2.56	14.56	3.12
490	AATTGGCGAAGTCAC	A191T,T351A,T613C,G617A	77.65	1.45	3.74	2.01	13.78	1.36
491	AATTGGGATAATGCC	A220T,TG469T,T601A,T643C	51.62	13.81	3.62	2.67	24.85	3.42
492	AATTGGGGTGACAAT	T48A,G639A	60.36	7.46	7.02	1.51	20.27	3.38
493	AATTGGTCTAAGTTA	WT	62.05	7.3	5.94	1.88	21.05	1.78
494	AATTGTTAACAATTA	G196A,C278T,G346C,G414T,A451T,A513G,T643A,T697C	73.58	2.29	2.61	5.29	13.52	2.71
495	AATTTACCACTTGCA	A69T,G242T	63.55	4.44	5.7	2.17	22.78	1.36
496	AATTTACGCCCGGTG	A156G,G192T,A232G,T660C	67.41	4.96	5.11	3.15	16.96	2.4
497	AATTTGAAATATGCA	A181T,A334G,T605C	65.24	4.29	8.57	2.38	17.14	2.38
498	AATTTGACAAATAGG	G109A,T115C,C403T	67.93	3.43	5.7	1.94	17.12	3.88
499	AATTTGGGTACACTC	T74A,G381T,C627T,T643C	54.39	4.7	3.94	1.52	14.39	21.06
500	AATTTGGGTGTGGAT	A82T,T440C	67.98	5.62	5.88	3.59	15.61	1.31
501	AATTTTAGGCGCGTA	T48A,G112A,A156G,G381T,T516C,G531A,G554A	2.99	0.43	0.21	5.57	19.39	71.41
502	AATTTTATTCATAAC	C34A,A226T,T446C,T643C	0.62	87.08	0	0.25	10.43	1.61
503	AATTTTCATGGATTT	T390C	76.56	2.11	5.35	2.46	11.68	1.84
504	AATTTTCCTTTATCT	WT	61.9	7.58	5.01	2.86	20.44	2.21
505	AATTTTCGTGTTGGG	G676T	64.71	6.38	3.7	2.85	20.5	1.85
506	AATTTTTAACAACAA	A383T,C546T	42.86	20.13	3.9	3.9	21.43	7.79
507	ACAAAATGAGTGTTG	A166T,G387T,G585T,C612A	56.74	6.89	5.79	1.6	26.87	2.1
508	ACAAACGTATATAGC	G106A,C154G,T701A	61.75	6.65	5.19	2.39	22.43	1.58
509	ACAAAGCTTTCCATC	A365T,T509A,G575A,A590G	52.65	13.13	4.47	2.1	21.65	6.02
510	ACAAATAATTGCTGA	G32A,A160T,C393A,T401C,A473T,C518T,T550A	60.73	10.2	6.4	2.11	19.92	0.64
511	ACAACATAATGAATT	AC59A,C143A,AC147A	70.13	7.44	4.29	2.64	13.28	2.21
512	ACAACATTCTGCCCT	C522T	66.9	7.85	5.16	1.27	17.78	1.04
513	ACAACCTGCAAAGCC	T394C,G629T,A641G	76.44	2.58	5.86	2.24	11.88	1
514	ACAACGTCTTTATTC	WT	67.38	6.49	4.96	2.34	16.87	1.94
515	ACAACTATATGACAT	G387T,G460T,C520A,G644T,C649T	44.08	18.12	2.46	3.07	29.03	3.22
516	ACAACTTTCAAAAGT	CA77C,G180A,A416T,A443G,A456T,G488A,C698T	5.8	69.62	0.46	0.23	23.2	0.69
517	ACAAGACAGTCCGTT	G378A	74.09	2.74	4.14	2.27	13.61	3.16
518	ACAAGACTGGCCACT	T102A,A182C,T308A,G340A,A356T,G579A,T704G	39.85	15.83	2.38	2.12	38.78	1.04
519	ACAAGAGATGTCTGG	T179A,T280A,G510A,A558T,T704A	22.34	37.76	2.13	0.54	32.97	4.25
520	ACAAGTCATCATTTA	WT	61.98	7.98	6.34	1.88	20.43	1.39
521	ACAAGTCTCTTCCGT	T74C,G183T,G297A,T329G,G452T,T601C,T613C,G639A	0.66	89.08	0	0.66	8.94	0.66
522	ACAAGTGAGGTTATT	C37A,G49A,C434T,C463G,G529A,T581A,C588T,A694G	52.68	3.97	0.81	4.21	32.82	5.5
523	ACAAGTTTATTAACG	C273A	74.7	2.58	3.58	3.38	14.51	1.25
524	ACAATACCAAAGGGT	C40A,T173C,C619A,C630A,T634C	56.96	7.61	8.4	2.63	22.31	2.1
525	ACAATATCTAGATTC	T469A	53.18	14.36	3.69	2.09	24.69	2
526	ACAATGTGAATAGAA	T249C,C512T	66.3	8.22	6.09	1.3	15.48	2.6
527	ACAATGTGCTATCCA	C144A,A188T,T289C,G353A,GC433G,C518T,G568A,T605A,G673T,G679A,G690A	59.62	4.18	1.05	3.35	30.12	1.68
528	ACACAATTACATAAC	T351A,C454T,A578T,A592G,T661A,G676T	66.7	1.52	4.23	5.5	20.8	1.26
529	ACACACCCAGTGAGC	C185T,A533C,C612T	NA	NA	NA	NA	NA	NA
530	ACACCATAATTCCTC	A483G	73.53	3.99	6.58	2.11	12.03	1.76
531	ACACCATTGGATCTT	T277A,T392A,C434T	42.2	10.74	6.28	1.99	21.88	16.91
532	ACACCCACGGACCGT	G97A,T465C,A533G,G559T,C662T	56.21	9.1	4.01	3.75	25.07	1.86
533	ACACCGTGAAATTCG	A166G,C482A	75.09	7.62	3.88	1.83	7.45	4.13
534	ACACCTGGGAATTAT	A88T,C121T,C703A	55.7	7.16	7.46	2.07	25.42	2.2
535	ACACGCATAGGTAAC	G172A,T581A,A663T,C703T	60.37	9.13	6.67	1.48	20.39	1.96
536	ACACGTAAAAATTGT	C344T,GC575G,G599A,T643A	63.66	5.65	3.49	3.49	21.54	2.17
537	ACACGTCAATCTATG	A368C,G426T,T701A	41.37	19.56	4.1	1.03	22.08	11.85
538	ACACTAACCGATAGT	G319A,A383C	68.44	3.92	5.65	2.65	18.46	0.88
539	ACAGAAACCAACCAG	C423T,C497A,C511T,A572C	59.63	19.38	4.25	1.52	9.77	5.45
540	ACAGAGACGTGAGAG	A65T,A385G,C450A	65.81	6.99	5.2	1.93	16.87	3.21
541	ACAGAGAGGTTATGG	T361A	58.12	13.28	4.9	1.67	18.86	3.17
542	ACAGAGGCTAAACAT	A220G,C320T,C324T,T429C	18.04	60.4	2.82	0.69	12.18	5.86
543	ACAGATATGCTACTT	WT	63.97	7.82	4.59	2.48	19.76	1.37
544	ACAGCAAGTGATATC	G377A	70.38	3.56	4.78	2.19	17.12	1.97
545	ACAGCACGAGGTTTG	A285G,A334G,A477G,T586C	53.6	20.42	5.43	1.64	15.82	3.09
546	ACAGCAGTGACTTAA	T195A,C261T,T469C,G686A	60.61	9.31	6.8	1.96	19.92	1.4
547	ACAGCTCATCAGATC	C157T,C437T,A533T,T660A	64.79	9.79	4.7	1.54	15.1	4.09
548	ACAGGATGCCTGAGG	A82G,G106A,C320T,GT388G,G479A,G599A,T634A,G651A,T688C	22.59	35.94	5.02	0.5	34.03	1.91
549	ACAGGGTGTGATTCA	AC59A	59.26	7.47	6.15	2.24	22.96	1.92
550	ACAGTAACGGCGTCA	T90C,T126A,T419A,G452A,G460T	65.13	8.94	5.5	1.94	17.06	1.43
551	ACAGTACTCTTTCTT	A296G	0.36	90.58	0	0	7.61	1.45
552	ACAGTCGTCATCGAT	T130C	74.91	6.81	3.36	1.72	11.24	1.95
553	ACAGTGACATGGCTT	C135T,T212C,G366A,T374C,T389C	10	5.24	6.19	1.43	75.71	1.43
554	ACAGTGGTAACAGAA	C399T,T439A,G529T	70.22	7.33	4.64	2.25	12.47	3.09
555	ACAGTTAATCCGAGT	A181T,GA245G,G387A	28.81	29.38	3.39	0.28	36.16	1.98
556	ACATAAACAAGCCGA	A105T,A166G,C197T	66.31	8.1	5.14	2.38	15.57	2.49
557	ACATAAATTATAATA	A88T,T130A,A371T,T392A	50.46	9.77	5.98	2.08	25.61	6.11
558	ACATAACCTAACACC	G75A,A232T	65.61	6.07	5.75	2.36	17.97	2.23
559	ACATAGGCAGCGGAA	C178G,C567T	NA	NA	NA	NA	NA	NA
560	ACATATAAGGCCATT	A202G,G228A	45.78	15.97	6.53	1.4	26.91	3.41
561	ACATATACAACTCTT	T432A,TG469T,T604A	64.27	2.32	4.55	4.07	22.26	2.52
562	ACATATGCGTGTCCA	WT	67.95	7.56	4.28	2.19	16.32	1.7
563	ACATATTTTTGGTTT	G104A,T289C,T498A	18.21	44.48	2.65	0.77	30.24	3.64
564	ACATCACTCGGGGTA	G574A	64.61	10.83	6.78	1.39	12.7	3.69
565	ACATCATGAGCAATT	T115C,C273T	70.5	4.09	5.07	2.87	15.97	1.51
566	ACATCCTACGCGAT	A118G,GC422G,G691A	NA	NA	NA	NA	NA	NA
567	ACATCTTAAGGAAAT	C64T,T361G,G387T,A533G,G664A	49.63	14.67	7.34	2.51	21.63	4.23
568	ACATCTTTACGTTAT	G310A,G647A,C700A	74.6	0.98	4.74	4.2	14.17	1.3
569	ACATGACAAATTCTC	C155G,CT603C	67.32	12.57	3.63	2.49	10.7	3.29
570	ACATGAGGTGTTCAT	C320G,A416G,C612A,T622A	5.05	69.18	0.92	0.66	21.87	2.32
571	ACATGATATACTTAT	A78T,C367CA,T634A,T650A	68.1	3.26	6.45	2.84	17.78	1.57
572	ACATGTTTGGCGTCT	A120G,G537C	65.81	7.71	5.24	2.13	17.21	1.89
573	ACATTAAGAACTTTG	C453T	59.99	8.56	5.21	2.79	21.92	1.54
574	ACATTAGGACGAAAA	C94T,A166G,T186C,A252G,A296G,T308A,T528A,C588T,A592T,C646T,T701G	1.36	26.53	2.04	0	55.11	14.96
575	ACATTATCAATGAGT	WT	61.58	8.1	6.46	1.38	19.47	3.02
576	ACATTCATGGACAAA	C28T,A171T,C519T,A641T,T643A	63.67	4.25	4.77	2.76	20.99	3.56
577	ACATTCGGTAAATC	WT	72.09	9.59	2.83	2.07	11.56	1.86
578	ACATTGCTCTAAGCG	T672A	64.74	8.11	6.5	1.63	16.93	2.1
579	ACCAAATAATAGCTG	G100T,G471A,A477T	39.12	23.28	4.31	1.19	31.03	1.07
580	ACCAATACTGCGGTT	A535T	61.47	4.23	4.44	2.75	25.5	1.6
581	ACCAATCATGCCCCT	G187A,G233T,G362A,C530G,T605C	36.49	4.73	1.35	9.46	35.47	12.51
582	ACCACAAATGTTCTT	A219G,A492G,A580T	59.2	4.49	4.65	3.53	25.11	3.02
583	ACCACGATACGCACG	G87T,A236G,A513G,T586A	57.03	10.89	8.71	2.3	15.93	5.13
584	ACCACGTAGAAGTAG	A160G	73.42	9.78	3.34	1.73	9.35	2.37
585	ACCACGTGTGGTCAA	WT	65.71	7.14	4.91	1.96	18.24	2.03
586	ACCACTCCGCTTTGG	A65T,T174C,A371T,G391A,C630T	48.62	20	4.89	1.42	21.87	3.22
587	ACCAGAATTAGCAAT	A101G,G180T	62.83	3.35	8.55	2.6	21.93	0.74
588	ACCAGATGTATGACC	WT	69.03	6.62	5.02	2.45	14.09	2.8
589	ACCAGTCACAGACAA	T509C	63.75	6.63	5.58	3.37	17.55	3.12
590	ACCAGTGCCTATGGT	WT	64.17	6.76	5.57	1.74	19.72	2.05
591	ACCAGTTAATACTTA	T401A,G584T	68.74	6.39	6.64	1.47	14.7	2.07
592	ACCATATTCATAAAG	T283C,T539C	55.21	7.92	10.62	1.45	21.91	2.89
593	ACCATCCGTTATTAC	A177G,AG443A	0.63	84.7	0	0.47	13.41	0.79
594	ACCATTAATGGTCTT	T162A,A451T	68.81	4.69	5.53	2.75	16.56	1.66
595	ACCATTGAATCAACC	T115C,G221C,T504C,T539C,A542G	5.93	1.48	0.74	18.52	59.26	14.08
596	ACCATTTTTTACGTA	WT	64.93	6.31	5.13	1.6	20.1	1.93
597	ACCCAATTTTAGGGG	A202G,A648T,A682T	64.3	6.72	7.35	2.16	17.39	2.07
598	ACCCAGACGTTATTT	WT	65.81	6.74	6.07	1.33	18.38	1.67
599	ACCCATAATACATTT	T48A,A285G,T289A,T390C,A485T,T528C,A560G,G563A,C596T,G679T	5.94	3.24	0.27	2.16	85.12	3.25
600	ACCCCACGCGAACCG	A101G,G445A,G448T	0.61	85.38	0	0.09	11.12	2.8
601	ACCCCCACCTCAGTC	G366A	61.64	10.61	5.77	1.73	16.2	4.05
602	ACCCCGCTGATAAGT	WT	66.49	5.67	4.76	2.69	17.7	2.69
603	ACCCGACAGTATGTT	C324T,C654A	53.28	14.65	5.77	1.96	21.76	2.59
604	ACCCGGCTAACTCAT	WT	26.37	1.89	51.28	0.62	18.45	1.39
605	ACCCGGTCGGTAGGC	AC141A,A296G,T621A,G686C	0.37	87.91	0	0.09	10.15	1.48
606	ACCCGGTCTCCGCTG	T86C,T374C,A685T	48.86	18.67	5.92	1.51	22.01	3.03
607	ACCCGTAATTGCCAT	C148T,T195G,A251T,G359A,T604A,C665T	59.96	6.31	2.18	2.31	27.67	1.57
608	ACCCGTATTTCGGTT	A101G,T137A,T325C,C336T,G606A,T697G	58.94	18.36	2.58	1.61	15.62	2.9
609	ACCCGTCAGGGGTTA	T274C,G318T,G402T,A492G,TG536T	72.68	5	2.72	3.22	11.97	4.41
610	ACCCTATTATCTTCA	T74C,C94A,C403A,C627T,A663T	70.46	5.84	4.05	1.87	16.17	1.61
611	ACCCTCACGAGTAAA	C360T,A494G,C649T,G680A,T688A	47.97	16.94	5.06	1.32	26.51	2.2
612	ACCCTCAGATGTTCG	A443G	5.14	88.06	0.16	0.32	5.46	0.85
613	ACCCTCTTGATCAAA	G73A,T608C	69.99	6.56	3.61	2.62	14.94	2.29
614	ACCGATCGTCATGGA	A252G,T274C,C407T,T516C,G531A,G670T	52.51	24.61	2.06	2.36	14.54	3.91
615	ACCGCCTTAAGCGTC	T39C,G76T,C198T,G449A,G481T,A483T,G501A,C519T	3.88	45.08	0	1.04	33.34	16.66
616	ACCGGAATTTTATAT	A181T,A338G,A356G,G387A,G584T	1.42	85.14	0.36	0.12	9.74	3.21
617	ACCGGATTATCCTAT	G27A,C367T,T401A,C476G,T604A,T688A	55.65	7.76	7.76	1.97	24.55	2.31
618	ACCGGGACCAAAAGT	C511T	68.33	8.37	7.58	2.16	11.62	1.94
619	ACCGGTTGACAGGTA	A105G,C144T,A220C,G272A	81.48	1.08	5.94	3.68	6.71	1.1
620	ACCGTACAACATTAC	A219G,T354A,A462T,T516C,G537T,C627A	70.56	1.93	4.38	3.51	15.07	4.55
621	ACCGTGAACATATCC	A83G,T200A,T308C,A443T,C502T	32.94	57.58	1.06	0.93	7.26	0.22
622	ACCGTGATTTAATTT	G235A,T240A,C273G,C314A	40.48	22.3	4.7	1.5	28.15	2.87
623	ACCGTGCATTTATAA	T84C	60.43	8.43	6.66	1.83	20.25	2.39
624	ACCGTGTGTTGCCG	T42A,TA218T,C458T,A590T,C615T,T669A,T704G	67.23	5.11	1.65	3.95	19.94	2.13
625	ACCGTGTTACTATAC	G377A,A425C,T536C,TC586T	75.39	3.65	3.41	2.14	12.54	2.86
626	ACCGTTAGGGCGACG	G417T,T621C	70.32	6.66	4.94	2.02	14.26	1.79
627	ACCTACCTCTTTAAG	A594T,A682G	51.18	4.02	4.9	3.72	34.9	1.28
628	ACCTATATGAGAGAC	G234A,G264A,A475G,G488A	52.9	8.69	6.16	3.62	20.65	7.97
629	ACCTATCGTTTAAGC	G35T,TG50T,G58A,A69G,A83G,C144T,T195A	52.22	6.85	6.18	2.42	31.01	1.33
630	ACCTCAGCAAAGCAG	C93T,G346T,G380A,C454G	76.15	1.43	4.09	1.78	13.17	3.39
631	ACCTCAGGGGGAGAT	T38C,T218A,G227A,T241C,A416C,C521T,A560T,C600T,T688C	37.14	25.06	5.07	1.35	29.58	1.81
632	ACCTCGAATTGACCA	C146A,G306A,C369G,T401A,G460T,G537T,T632C,C684A	71.02	0.56	4.69	6.69	11.48	5.57
633	ACCTCGGCGGGACGC	G332A,T392C,G606A	79.42	0.36	4.11	5.68	9.95	0.48
634	ACCTCTAAGGGCCCA	A358G,C399A,C497G,T562C	8.99	61.73	1.16	0.87	25.22	2.03
635	ACCTCTATAATATTT	T116C	62.57	6.37	5.29	2.59	20.74	2.44
636	ACCTCTGACGGCTGG	G76T,A253T,G355A,T459C,C493A,T605C	56.09	20.63	4.46	1.39	15.75	1.67
637	ACCTCTGTTTCGAAA	C144T,T212A,A232G,C520T	3.43	1.14	17.72	0.57	73.72	3.43
638	ACCTCTTGGACATTC	C175G,T218A,G318T	70.59	0.65	7.19	4.58	16.99	0
639	ACCTCTTTGTCTACC	C77T,C143A,T539C	65.47	8.52	5.68	2.22	15.97	2.14
640	ACCTGAAAAAGGAAC	T392C,C551T,G639A,G686T,G690T	67.64	3.4	1.67	7.07	16.05	4.17
641	ACCTGGCAGCGTGAG	WT	65.43	6.33	4.66	1.82	19.48	2.29
642	ACCTGTCACCCGTGA	T115C,C404T	66.68	6.44	5.47	2.04	16.94	2.44
643	ACCTTATCCCGGGTT	T321C,T409C	75.01	2.69	5.4	2.23	12.78	1.91
644	ACCTTCACTGCCAGT	G387A,C684T	39.47	18.95	4.81	0.85	32.95	2.96
645	ACCTTGAAGTCTCAC	C94T,G187T,G233A,T446A,T605A,T625A	1.91	55.71	0	1.43	37.62	3.34
646	ACCTTTTATACGCAT	T291A,G297T,A368T,A483C,C515T,A592T	0.46	86.68	0	0	12.63	0.23
647	ACCTTTTCCAGAAGA	WT	67.08	6.75	5.54	1.97	16.75	1.91
648	ACCTTTTGCTCCCAT	G103T,G161C,T170C,C184T,G192T,T225C,C231A,A338T,C434T	58.09	2.86	8.57	1.9	19.05	9.53
649	ACGAACTCAGAAATC	AC147A,T632C,G651A	66.7	7.18	5.65	1.65	16.86	1.96
650	ACGAATAACAACTTA	G128A,A337G,A541T,T616A	61.73	1.86	3.46	3.78	19.4	9.78
651	ACGAATACCAGTCCA	WT	66.14	6.41	4.55	2.46	18.1	2.34
652	ACGACAATGAACTTC	T206A,T207A,G235A,T317C,C490T,G686A	74.28	3.28	5.98	3.06	12.28	1.1
653	ACGACAGGGTCGGGT	T50C,G56C,C155A,C176A,A226G,A263G,T267C,A282G,T321C,A492T,T601C,G639A	14.69	29.94	7.91	1.13	40.67	5.65
654	ACGACCATCCGGATA	C64T,G196A,T225C,A385T	55.94	13.4	5.28	2.09	21.75	1.54
655	ACGACCGGGAATGTT	WT	67.36	7.07	5.59	1.9	16.04	2.04
656	ACGACCGTTGAAACG	T42C,G128A,T291A,C339T,A416G,T465C,G555T	0.97	80.57	0.12	0.08	11.35	6.91
657	ACGACGTGGCAAGAG	C33T,T240C,G328C,A356G,G379A,C437T	53.91	15.04	4.86	0.86	15.73	9.59
658	ACGACTACTCTATTC	C155A,T247A,C396T,C415T	34.68	31.5	3.62	0.33	27.11	2.75
659	ACGACTCTCTAACAC	C143A,A323G	40.08	36.54	2.23	1.49	14.24	5.43
660	ACGAGACTGCTGGTG	A181G,C375T,T532A,G555T,T643C,T666C,A694C	NA	NA	NA	NA	NA	NA
661	ACGAGGGGTAAAAGG	T116C,T394A	55.63	9.45	6.9	1.65	24.08	2.28
662	ACGAGTTGATGCGGG	A65T,C77T,C185T,T280A,G656T	NA	NA	NA	NA	NA	NA
663	ACGATCGCCGACTGC	CA159C,T212C,G260A	29.26	6.11	10.52	1.05	49.26	3.8
664	ACGATGGGGGGTGCC	G72A,G87A,G99T,T347A,T528C,G686A	76.15	3.05	3.44	2.54	12.54	2.26
665	ACGATTCCACTTTCG	G112A,C158A,G223A,T225A,G276A,G402A,G568T,T613C,T616A	63.3	0.46	7.03	3.37	12.85	12.99
666	ACGATTCGATAATAA	T70C,A156G,C164T,G234A,G387A	28.54	43.51	2.93	0.62	21.9	2.5
667	ACGCAACAGGTAAAG	AG96A,G233A,T249C	55.84	13.92	5.92	1.92	20.48	1.93
668	ACGCACATTTTTGTT	G99T,C405T	73.44	2.69	4.2	2.69	15.29	1.69
669	ACGCAGCATTAAGGT	A236T,A338G,A416G,C571T,G626T,C654G	58.25	13.76	5.5	1.84	20.18	0.46
670	ACGCATCTAACCCAG	T173C,T696C	59.5	2.58	2.23	4.99	29.06	1.64
671	ACGCCATAGAAGATT	WT	67.18	6.96	4.99	1.88	16.95	2.03
672	ACGCGACGTAACCCA	T31A,T86A,T179A,A506C,C618T,C703G	1.27	23.88	0	11.14	53.5	10.2
673	ACGCGCTATAATATG	C376CG,G422T	46.51	21.12	5.82	1.47	21.52	3.56
674	ACGCGGGTGGAATTA	A506G,G657C	1.48	5.05	0.17	24.81	50.59	17.9
675	ACGCGTACTGGTGTC	G306T,T516C,A572T,C687T	78.35	1.24	2.97	5.1	10.65	1.68
676	ACGCGTCAACCCGTT	T504C,T655C,A682G,G690T	1.34	0.67	0	18.05	75.92	4.02
677	ACGCTCCAACCATGC	G391A,A425G	25.02	43.34	1.63	1.39	27.07	1.54
678	ACGCTGGGGGGGTGT	WT	67.55	5.41	5.33	1.62	17.69	2.41
679	ACGCTTGGGGAGAAT	C307T,C415T,A494G,C646T,A689G	5.93	70.19	0.77	1.08	20.8	1.23
680	ACGGACTAGAATAAG	C124T,T140C,C418G,C512T,CA571C,T604A,G651A,G690T	48.17	36.16	1.06	0.85	4.26	9.49
681	ACGGATTTATCTTCA	T621C	76.85	6.2	3.31	1.24	10.74	1.65
682	ACGGATTTCCTGCTG	A147T,T200C,G381T,G417A,GC452G,T469A,A474G,G480C,G538A,G555A,C600A,T666A	20.59	9.89	2.01	1.83	21.44	44.24
683	ACGGATTTTCATCAG	G311T,T351C,C467G	55.12	16.43	2.52	5	19.97	0.96
684	ACGGCCCCCAAGACG	T459C,C687T,G690A	51.82	1.2	0	7.23	37.35	2.4
685	ACGGCCGTCTGATAA	WT	61.63	6.95	5.77	2.02	21.55	2.09
686	ACGGCTACAACATAT	G80T,A199G,C400T,G647C	64.4	4	2.19	6.26	20.46	2.69
687	ACGGGCGATCTTGTA	T283C,C603G,A689T	60.84	6.9	6.78	1.47	20.57	3.45
688	ACGGGGCGTGGGTCC	T200C,A356T,T432C	68.24	7.5	4.89	2.04	15.23	2.1
689	ACGGGTTCCGACGTC	A177G,T277A,C307T,A358G	1.08	83.61	0.25	0.25	12.9	1.91
690	ACGGTCATAGAACGC	WT	65.9	7.24	5.21	2.2	17.91	1.54
691	ACGGTCGTTAAACCT	C463T,T632C	62.74	6.41	7.31	1.43	20.32	1.79
692	ACGGTGATATGGAAA	A385G	65.78	5.98	6.06	1.76	18.78	1.63
693	ACGGTTTTAGGCAAG	T70C,G328C,A383T,C503A	35.23	4.23	1.69	10.26	36.19	12.41
694	ACGTAAATTAGAAGA	WT	62.78	9.09	3.9	0.86	21.65	1.73
695	ACGTATCATAATCGT	G229A,T543C,T608C	47.52	19.49	7.29	1.14	20.92	3.64
696	ACGTCAAATTAGTTT	T277C,T465A,T545C	52.86	13.36	8.42	0.78	22	2.58
697	ACGTCAGGTTGTTAT	G73C,TG102T,A220G,CG376C,T389A,T420C,T446C,A447T,T543C	0.62	87.19	0.06	0.44	8.54	3.15
698	ACGTCCAGCCCAGTA	A82G,T207C,T374G,C615A,C624G,C703A	52.68	3.82	5.6	3.31	32.82	1.77
699	ACGTCCAGGTCAATA	A45T	66.18	6.78	6.01	2.37	17.03	1.63
700	ACGTCTAAGTAGCTT	C159A,A282T,G352A,G445A,T498A,T638G,G690A	1.23	69.12	0.14	0.41	28.42	0.68
701	ACGTCTCGAAGTTTC	A252G,G370A,G448T,A474G	33.38	20.63	2.46	1.26	16.99	25.28
702	ACGTCTCTAGGATTT	C159G,A214T,G242T,T351A	75.49	0.78	4.52	3.2	14.66	1.35
703	ACGTCTTAATAAGTG	T249A,G381T,A523T,C567T	1.15	0.38	0	6.02	23.51	68.93
704	ACGTGAGCACGGGTA	G215A,G607A	49.48	3.2	4.63	2.14	38.45	2.11
705	ACGTGGTAGCCGCTT	WT	65.76	6.52	5.26	1.76	18.38	2.31
706	ACGTGGTGAGCGATA	G342T,T347C	70.03	4.08	5.23	2.47	15.94	2.26
707	ACGTGTCAGCACTGT	T29C,G80C,T293A	1.98	63.62	1.91	0.14	23.62	8.74
708	ACGTTATCATATATC	T115C,C345T,C400T,A425C,G566T	40.14	26.26	4.86	1.19	20.6	6.94
709	ACGTTATCTCTGGAC	T116A,C143T,T216A,A296G,A338G,C399T,T459A,A483T,T625C	0.53	87.83	0	0.14	10.45	1.05
710	ACGTTCTCATATATA	T137C,C273G,T704C	56.9	9.57	5.04	2.31	23.87	2.31
711	ACGTTCTTTGTGGTG	A78G,A337T,A371G,T386A,T459C,A541C,T543C,C615A,G645C	22.02	55.66	3.08	0.25	14.54	4.45
712	ACGTTGCGCAAGATA	AG188A,G702A	60.43	7.74	6.96	2.04	20.87	1.97
713	ACGTTGTGCTCGTTT	G76A,A323G,C400A,G444A,G481C,G484A,GC517G,C646A	1.65	28.81	0.27	1.23	63.66	4.38
714	ACGTTTAGTCCTAAT	G204T,G322A,A323G,G370A,A383T,A474G,T562C,A597G	6.81	66.62	0.66	0.42	16.1	9.39
715	ACGTTTGTCTAAGAA	T130A,T174C,T386C,G388C,T643C	66.53	5.9	5.84	1.35	18.44	1.93
716	ACGTTTGTGAGCCAT	T201A,G260C,C397A,A428G,C598T	48.38	23.49	2.82	1.99	21.32	2
717	ACTAAAAATACAGTA	C512T,G691A	24.31	1.25	0.25	16.54	56.89	0.75
718	ACTAAAAATGTGCGA	C121A,G441A,A443G,CA512C,C567T,C624T,G635T,G676T	6.81	34.53	0.24	1.07	55.43	1.92
719	ACTAAATTAATTTCT	A78T,T126A,A199G,A285G,T697A	39.67	21.38	6.75	1.26	29.82	1.12
720	ACTAACTTTCTTTTC	A181G,T195A,G319A,T347A,A365T,G395A,A425G,T548C,A558T,T608A,A694T	NA	NA	NA	NA	NA	NA
721	ACTAAGGCTGTTCA	WT	71.43	7.24	3.7	2.1	13.44	2.09
722	ACTAAGTATTTACGT	A194T,T207C,AG220A,C261T,T280A,G355T,C450A,A473T,C630T	2.58	61.94	0.64	0	32.9	1.93
723	ACTAATAATTCTGTC	G444A,GC452G	1.4	81.7	0.08	0.3	15.65	0.87
724	ACTAATATAATTATG	T354A,G593A,A641T	81.09	3.08	4.61	2.9	5.34	2.99
725	ACTAATGTGACCATA	T126C,T137G,A301G,A337T,G352A,T394G,C602T	61.98	9.54	5.78	2.78	17.89	2.03
726	ACTAATTATACTGTT	C139T,C339T,G531A	17.82	44.08	3.51	0.65	30.82	3.12
727	ACTAATTTCTTTTTT	T31A,G244A	60.03	3.99	5.48	1.87	26.65	1.98
728	ACTACACTTCCGTTT	G52A,A78G,G215A,T429C,C521A,G673T	59.4	5.88	5.59	2.65	24.12	2.35
729	ACTACATTAGTGTGT	T126C,A337T,C339T,T341C,G381A,A474G,G568T,TC586T	59.93	10.95	4.02	1.89	16.91	6.3
730	ACTACCTGTACAGAT	G258A,G271T,T308C,A371T,G426A,A483T,C497G,G574A,T669C,C700T	65.93	1.33	5.25	5.69	11.78	10.02
731	ACTACGGGCGTGACA	C62T,G359A,A648G	66.53	4.13	2.48	2.48	21.49	2.89
732	ACTACTCCCTCTTTA	G257T,C266A,T429C,A560C	65.67	1.68	13.45	2.17	14.88	2.16
733	ACTACTTAGGATCGT	C231T,A268G,A383G,T638C	64.74	1.8	11.27	1.92	18.82	1.45
734	ACTACTTGCGCTATG	A44T,A263T	56.69	7.57	6.01	2.56	25.29	1.87
735	ACTAGAATAGGATTA	G350A,A443T,T509C	54.6	12.88	2.33	5.48	22.26	2.46
736	ACTAGCTCTTAACCA	WT	65.99	10.2	4.58	2.08	13.58	3.57
737	ACTAGGACCAGGAAT	GC517G	43.42	1.84	1.84	9.21	38.94	4.74
738	ACTAGGAGATGCCTG	C336T,G378A,T465A	22.12	33.65	2.4	1.44	32.21	8.17
739	ACTAGTACGTTCGAT	T136A,T621C	68.33	6.07	4.15	2.55	16.97	1.93
740	ACTAGTTGAAATAAA	A358G,C364G,T390C,T539A	13.31	57.91	1.8	1.08	21.94	3.96
741	ACTATACGGCATCGA	C369T	51.43	18.95	5.32	1.74	19.82	2.73
742	ACTATCGTACTTTTT	T46G,C54T	63.96	7.84	4.29	2.88	18.57	2.47
743	ACTATGCTACAAATC	T293C,T553C,G575A	66.85	6.77	7.89	1.4	14.24	2.85
744	ACTATGGTAGTTCGA	WT	63.85	7.73	5.57	1.95	19.26	1.64
745	ACTATGTATTCTTTC	G378A,A462T	71.77	2.96	5.42	1.44	15.89	2.53
746	ACTATTCACCCCTTC	G32A,C157G,G606A,T632A,G644A,T697C	50.01	3.05	1.72	7.44	35.5	2.28
747	ACTATTCAGTCTAAG	T267C,C269T,A296G,G297A,C437T,C587T	0.64	76.75	0.06	0.13	20.63	1.79
748	ACTATTTATTGCTCG	A236G,G593T	61.71	5.43	5.11	3.57	22.8	1.39
749	ACTATTTCGATTTGT	T270A,A285G,A578G,T643C,T688C	55.3	21.15	3.62	1.85	15.21	2.87
750	ACTATTTTATCGAGA	C60T,AC147A,G204T,C307A,T509C,A523T,T548C,T634C,C665A	0.59	0.2	0.13	7.9	26.88	64.3
751	ACTCAAATTATGTAG	G75A,C652T,G680A	61.49	7.45	3.43	2.83	22.99	1.81
752	ACTCACGAGTAAACA	G313A	41.72	21.79	5.38	1.23	26.88	2.99
753	ACTCAGGCATCAATA	G671A	60.92	7.5	6.81	1.7	21.19	1.9
754	ACTCAGTAGTTTGTC	T70C,A194G,A214T,T631C	62.97	4.59	3.01	1.81	25.81	1.8
755	ACTCATCCCGTAGGA	G81A,A578G,T669C	67.07	9.36	4.78	2.33	14.02	2.44
756	ACTCCCTGGTATACA	C164A,A252C	66.32	5.6	5.21	2.51	18.42	1.96
757	ACTCCGTTTTGCGCC	G52GT,T111C,T162C,C458G,G486A,T516A,C627T,G664A	0.84	0.42	0.84	17.72	70.05	10.12
758	ACTCGCGGTTTGATT	TC132T,A203T,T509C,T704C	60.46	7.15	5.18	2.69	20.7	3.82
759	ACTCGTAATTCGAAG	A214T,A356G,T631C,A681T	9.99	51.2	0.68	0.79	33.83	3.5
760	ACTCGTCGATGGTAA	G215A,G227A,T392C,G444T	1.1	68.81	0	0.44	29.21	0.44
761	ACTCGTTCGGACTTC	T317A,C404A,T553C	70.39	4.8	5.93	1.12	16.58	1.18
762	ACTCTAATCTCTTGA	T38A,G134A,AG220A,G378A,C490T	78.9	4.54	2.71	1.83	8.12	3.89
763	ACTCTACCGTGTTAC	T672A	59.75	7.75	7.34	1.65	20.8	2.7
764	ACTCTATATCTTGAA	T162C,C307A,G349A,C515T,T669A	82.77	1.63	4.15	2.28	8.03	1.13
765	ACTCTATGATGGCTT	A166T,C168T,T206A,G294A,G379T,G417A,G433A,A447T,T613A,T634C	11.08	45.06	1.08	1.48	29.8	11.5
766	ACTCTCTAGCACGTT	C367A,T610C	58.58	5.13	3.88	2.63	28.92	0.86
767	ACTCTGCACAATTTT	T354C,C363T,T390C,A443T,C497T	18.63	41.42	0.83	3.16	34.1	1.85
768	ACTCTGGAAAAGTCT	WT	63.42	6.44	5.67	2.65	19.63	2.2
769	ACTCTGGTCTTTTTA	G71A,T174C,A365G,T459C	56.69	7.49	3.74	3.21	28.34	0.53
770	ACTCTTCAATACTAG	A181G,C396T,T516C,A685T	59.28	3.26	6.51	3.58	24.76	2.61
771	ACTGAAGTACAACAA	C94T,A101G,A188G,A338G,G495T,G564C,C571T,C646A	62.17	9.91	4.5	0.9	18.92	3.6
772	ACTGAAGTCGATTCT	G243A	61.3	6.49	5.1	1.78	22.78	2.56
773	ACTGACGTTGTATAG	C184T,C463T,C615G	64.71	7.56	5.88	2.52	16.81	2.52
774	ACTGATAATACGTAC	A44G,C615G	61.57	5.91	5.06	2.2	23.3	1.96
775	ACTGATGTAGCAAGG	G449T,A663C	10.61	57.31	1	1.43	29.22	0.43
776	ACTGATTTTGTCATT	AC141A,T704C	66.24	8.44	4.08	2.11	17.58	1.55
777	ACTGCAATCTGTGGA	A65T,G575A	65.37	8.91	6.38	1.57	13.95	3.83
778	ACTGCCAGTGTTAAC	G414A	64.15	12.34	4.35	2.41	12.49	4.28
779	ACTGCTACTATATAT	T136C,C184G,A296T,T335C,G372A,C527T,G537A	NA	NA	NA	NA	NA	NA
780	ACTGCTATCATACTG	A263G,T545A	61.36	7.66	5.7	2.16	20.71	2.4
781	ACTGCTTCTTCTATT	T643C	68.42	7.58	4.94	1.91	15.19	1.96
782	ACTGCTTTACAGGTA	T50C,T130C,A232G,T361A	62.53	11.59	5.13	2.09	16.33	2.32
783	ACTGGATCACACTTT	G239A,G555T,T638A	56.88	6.25	6.06	2.81	19.79	8.2
784	ACTGGATTATTCATC	T39C,T289C,C675A	19.12	42.07	0.55	0.55	34.42	3.29
785	ACTGGCATTATCAAC	WT	62.18	6.79	5.01	2.89	20.86	2.27
786	ACTGGCTTATTAAAA	G426A,G457T,T655C	57.24	8.37	6.75	2.66	19.39	5.59
787	ACTGGGCCAGCTACT	G79A,C143G	67.93	8.67	3.34	2.68	15.35	2.04
788	ACTGTAGTCAATTGA	A47G,C124G,A473T,G488C,C675G	46.53	4.36	2.91	4.2	40.39	1.62
789	ACTGTCGTAATATGA	A26G,T29A,G310T,T361C,T516C,C520T,G599A	66.86	1.32	7.88	3.68	17.3	2.95
790	ACTGTGACTTATCGT	C615A	59.19	6.8	6.04	2.75	23.34	1.88
791	ACTGTGCATGTGAGA	T84C,TG308T,A547T,T621C	72.24	1.05	4.07	6.22	13.13	3.28
792	ACTGTTAATGTTTGT	A152G,T419A	65.83	5.56	4.65	2.43	19.03	2.5
793	ACTGTTCTAGCTGGT	G68C,T308C,G332A,T351A,C400T,A592T	84.28	0.2	2.46	6.27	3.42	3.38
794	ACTTAAAAAAGCAAT	T130A	62.78	7.08	5.32	2.15	20.46	2.19
795	ACTTAAAATATATGC	T216C,A282G,T317C,G319C,T394A,G479T,G585C	7.23	33.01	3.86	0.97	48.43	6.51
796	ACTTAATTTCTATTA	T42C,G264A,G430A,G651A	54.86	14.28	5.71	0.57	22.28	2.29
797	ACTTACAGGGAGAAA	G163C,C397A,A477T,C552T	56.95	1.4	4.06	4.53	24.6	8.45
798	ACTTAGCGATCCTAT	G72A,C77T,T137A,G271A,C345T,T354A,A572T	72.7	2.12	3.06	6.82	14.59	0.71
799	ACTTAGGGGTAGCTT	A160T,G245A,T390A,G563A	46.93	8.45	3.5	2.31	37.81	1
800	ACTTAGTCGCGCCTC	G66T,C178A,G330A,T545C,T616C	63.17	3.77	5.02	2.51	23.43	2.1
801	ACTTATACACCGTTC	T170C,T469C	66.48	9.41	4.54	2.27	16.09	1.21
802	ACTTATAGAGCCGAA	T283C,G484A	62.28	9.46	5.74	1.46	16.66	4.39
803	ACTTATCTGGCTTTT	G51A,A83G,C159T,T315C,G422A,G484T,T628A	59.69	1.03	5.49	4.29	25.05	4.46
804	ACTTATTGCTTCGCG	WT	66.26	7.29	5.27	2.35	16.67	2.17
805	ACTTCACAAAACAAG	WT	63.71	6.99	5.07	2.29	19.72	2.22
806	ACTTCCAGTTTCCCA	A338G,C437T,C654T,G676T	55.82	11.28	3.3	1.94	22.55	5.12
807	ACTTCGCTAGTGACA	C36T,T126A,G328A,A371T,A475G,A572T,G579A,G623A	61.64	7.54	5.17	2.59	20.69	2.37
808	ACTTCTCCATCCGAT	A236G,A323G,C482T,T672A	56.79	18.53	6.13	0.95	15.09	2.51
809	ACTTCTTTTCTAATC	C54T,C62T,T111G,A368T,TG605T	49.05	30.92	2.93	1.04	12.78	3.29
810	ACTTGCTACGATTAA	G189T,G294C,T335C,G402A,A425G,C490T,G683A	30.49	34.86	3.9	0.94	27.07	2.73
811	ACTTGCTACTCTAAG	T565C,C598T,C698A	61.22	7.37	5.94	2.01	21.18	2.27
812	ACTTGCTTAGGAAAA	T153C,T361C,T638A	49.74	8.36	5.96	2.3	31.24	2.4
813	ACTTGGAGAAGTCGA	T325G,GC362G,T401G,A416G,A462T,A483G,T539A,T650C	77.55	2.82	4.55	2.67	12.03	0.38
814	ACTTGTCATGTTCGG	WT	66.17	7.21	5.19	1.48	17.84	2.1
815	ACTTGTTAAATGATA	WT	62.16	6.07	5.13	2.5	22.2	1.94
816	ACTTTAAATGACAGT	A238G,T565G,T661A	51.34	1.81	0.9	17.12	27.56	1.26
817	ACTTTACTAAATCGG	C344T	53.24	9.85	6.51	2.36	25.38	2.66
818	ACTTTACTTTAGCTC	T655C	59.47	7.39	5.82	2.18	22.87	2.28
819	ACTTTCATGGTAGCT	T102A,A167T,A199T,T274G,A285G,A506T,G507A,G673A	4.77	47.73	0.43	1.95	37.31	7.8
820	ACTTTCCTAGACCGT	G32T,A105G,C178A,C411T	65.84	2.85	5.69	4.63	18.16	2.84
821	ACTTTGAGCGTATTT	T90C,T130G,G359A	60.62	11.35	4.2	2.12	18.82	2.89
822	ACTTTGTTAAAGTGG	A45G,G189T,G481A	50.18	9.59	4.43	0.74	25.09	9.97
823	ACTTTTTTTTCTCAG	G106A,A147G,C687G	63.43	6.17	4.84	2.43	22.24	0.89
824	AGAAAATACATCCGT	C129G,C611G,A667G	67.61	6.17	4.3	2.31	18.08	1.52
825	AGAAACAACTCTTTC	T84A,A338T,C637T	67.05	5.86	4.72	2.41	18.16	1.8
826	AGAAACAGTCAGAAA	C33T,A358G,T509C,A572T,T581C,C665T	4.09	71.46	0.74	0.59	17.18	5.94
827	AGAAACTCGTGACCG	T102A,C415A,G574C	73.53	4.86	7.32	1.64	11.1	1.55
828	AGAAAGATCTCATGA	GA56G,TG70T,A648G	69.56	4.4	4.12	3.2	17.97	0.75
829	AGAACAAAGGCGGTC	C93T,G95A,T137C,A256G,T622A	68.02	2.74	8.48	2.35	15.67	2.73
830	AGAACCTTTCTCCTC	G109C,AC147A,A177G,C307G,G525A,C703A	8.75	36.06	0.54	1.37	40.43	12.85
831	AGAACGAAGGTTTGG	T115C,A156G,A177G,G452A,T539C	66.72	6.07	7.22	2.63	15.57	1.8
832	AGAACTGAAGGATTT	WT	64.98	6.2	5.88	2.18	18.76	2
833	AGAACTTAATATTAC	A65G,A542T	55.53	4.98	6.16	2.76	24.01	6.56
834	AGAACTTGGCGCGGT	WT	66.57	6.71	4.93	1.49	18.9	1.4
835	AGAAGCATGCATTGA	G190A,T361A,T390C,G517C,T628C	75.22	4.83	7.7	1.38	9.96	0.9
836	AGAAGTGAATTACCA	G73A,T108C,G318T,A408T,C511G,A689T	65.54	2.76	2.57	5.94	16.58	6.62
837	AGAATAAACATATGT	A383G,G656A	66.07	4.37	4.78	2.47	21.75	0.56
838	AGAATACATTCAGAT	C139T,T351A,T413C,A492G,TC550T,C649G	75.77	1.47	2.38	5.43	10.81	4.15
839	AGAATATGCAGATTC	A82T,G95A,TG562T,G569A,T625A	64.8	9.74	2.99	4.12	17.23	1.12
840	AGAATCACAAAGCTC	T308A,G574T	67.71	7.74	3.74	1.68	15.73	3.41
841	AGAATGAAGTTCCAA	G95A,T126A	70.51	4.7	5.56	2.14	14.53	2.56
842	AGAATGAGCCCCTCA	T132C,A191G,A236T,G257A,G309A,G328T,A365G,T621A	76.36	0.74	3.63	1.97	15.49	1.8
843	AGACACCAAAGTCA	T137A,G294A,T329A,C393A,A485T,A535T	79.63	2.35	3.11	3.49	8.28	3.14
844	AGACACGTAGCTTAA	CT412C,T601C	63.7	5.09	5.74	1.91	21.66	1.9
845	AGACATCGATGGATT	C266A,T291C,C295T,G350C,T632C,G664A	1.39	66.73	1.77	0.28	27.71	2.12
846	AGACATGGAGAGACA	G67A,T108A,C159T,C278T,C437T,G647A,A682T	72.27	4.39	2.98	2.92	14.03	3.41
847	AGACATGGCTTGTAC	G99A,C602T,A689T	69.75	9.91	3.43	2.56	11.2	3.16
848	AGACCGCTTATAGAT	T280A,G346A	22.22	31.94	5.1	1.01	34.49	5.26
849	AGACCGTAATACTTT	T240C,A299T,G422A	69.53	2.38	5.71	2.65	12.17	7.55
850	AGACGGATACCCGTG	T29G,T315C,C627G	66.31	2.99	5.12	3.5	21.1	0.98
851	AGACGTCTTATTCCC	C619T,A641G	73.49	6.67	4.29	1.53	11.74	2.28
852	AGACTATGATTTTTC	WT	65.26	6.96	4.38	2.32	18.95	2.12
853	AGACTATTAGGTTAT	C41A	63.32	5.48	5.63	1.83	22.37	1.37
854	AGACTCCTTTGACAT	C139A,T162C	65.94	8.99	4.48	2.17	15.86	2.56
855	AGACTCTATTTGTAT	T200C,T207C,G230A,C503G	16.72	3.18	1.06	10.88	57.84	10.32
856	AGACTTAATTTTCTT	T173C	63.92	6.81	5.54	2.31	19.84	1.59
857	AGACTTCCCGCTCCG	T386C,T526A	58.29	2.21	3.04	4.97	21.82	9.67
858	AGAGCACGGCCGTTG	T280C,T704A	18.15	32.31	5.54	1.13	37.55	5.33
859	AGAGCAGGTCATATT	G134A,T174A,T206C,C521T	68.37	4.37	4.73	2.91	18.55	1.08
860	AGAGCCCGCGCAGTC	T277C,G352A	NA	NA	NA	NA	NA	NA
861	AGAGCGGGGTGTGGG	A166G,C281T,G391A,A456T	53.02	19.77	5.62	1.4	17.85	2.34
862	AGAGCTAGACAGGCA	C158T,A167G,C406T,T420A,T586A	40.95	33.42	5.08	1.18	17.06	2.31
863	AGAGCTGAATTACTA	G66A,T274A,T280C	19.02	28.31	6.2	0.7	42.11	3.66
864	AGAGCTTTCAGGCGA	T186C,C450T,G563T	70.99	2.83	4.48	4.25	16.27	1.18
865	AGAGTAGTCGGCATG	T351A,GC395G	77.34	1.43	4.98	2.73	11.65	1.87
866	AGAGTATTCGCAACA	T70G	71.01	5.71	4.47	2.04	15.04	1.74
867	AGAGTGACCGGGCGC	A356T,CT468C,T548C,T638C	50.72	12.01	5.1	1.37	25.26	5.54
868	AGAGTGGGCATTCTA	A105G,G326A,G471A,T634A	36.72	22.57	4.65	1.77	32.08	2.21
869	AGAGTTCTCGGACTA	G233C	59.45	11.33	4.44	1.98	20.81	1.98
870	AGAGTTTAGAATTTT	A214G	56.99	4.11	3.98	2.31	30.42	2.2
871	AGAGTTTAGTGCGTT	C150A,C434T,C521A,C587A,C646T	67.86	5.46	4.42	2.35	17.76	2.14
872	AGAGTTTGAAACTCG	T186G,TG351T,G422T,G534T,A689T	63.56	1.87	5.61	10.28	16.82	1.86
873	AGATAATACACCTCC	T53C,A69G	66.57	4.79	5.68	1.6	19	2.37
874	AGATAATTAATCTGA	T39C,C154T,G163A,A338T,G448T,A483G,G487A,A547T,G566A,C588A	42.12	3.38	3.38	1.35	35.14	14.63
875	AGATACTCTTAGCCT	A194T,T283A,T325A,A371T	1.86	58.14	1.4	0.46	33.49	4.65
876	AGATACTTTTAAGTC	T270C,T420C,C423T,G595A	58.03	11.45	4.3	1.61	20.94	3.69
877	AGATAGCACGCAGCA	T111G,A694G	50.71	2.21	0.99	7.73	37.45	0.9
878	AGATAGCTTGTATGT	G52C,T557C	63.52	8.81	6.08	2.07	16.01	3.5
879	AGATAGTTCCGAATT	WT	65.63	7.05	5.58	1.8	17.95	2
880	AGATATACGATAAGA	G106A,C150A,A188T,C646T	60.98	3.57	3.19	3.69	26.78	1.78
881	AGATATATACGATAT	WT	65.93	8.24	5.23	2.79	15.93	1.88
882	AGATATCTATATAGG	WT	62.44	6.6	7.04	1.78	20.12	2.01
883	AGATCAAGGGAAAAG	T50C,A238G,G297T,C345A,T440A,A447G,C615T,A689T	0.25	92.66	0	0	6.82	0.27
884	AGATCCTGAGTTTCC	A285G,T650C	49.5	10.94	3.6	3.23	30.97	1.75
885	AGATCTATAGATTCC	G109A,C398T	70.74	1.32	6.27	2.2	16.61	2.86
886	AGATCTCTAGCGTGA	T108C,C168T,A181G,T660A	61.97	8.55	2.99	3.85	21.79	0.85
887	AGATCTTGCCGTCTT	WT	75	6.49	2.98	0.77	12.67	2.09
888	AGATGAGGATTATCC	C129T,TG308T,T327A,C437T,G471T,TC601T,G606T	70.16	5.35	2.61	3.74	16.29	1.85
889	AGATGATTATTTTCT	G97A,C624T	67.06	8.63	5.61	2.45	14.24	2.01
890	AGATGGACCGCCTCA	A147G,T459C,G501T,G534T,C571T,T608C	64.03	4.71	4.5	2.36	23.98	0.42
891	AGATGGCTGATTAAA	G95A,C411T,A513G,C596A	68.74	3.07	6.21	2.84	15.04	4.1
892	AGATGGGTGTAAATC	G35A,G104A,T136A,C139T,A156C,C324T,T347A,A473G,A590G	63.64	7.83	5.46	1.96	18.6	2.52
893	AGATGTTACAGTCTG	A365G,T491C,T604A	69.43	7.24	2.95	3.22	12.69	4.48
894	AGATTAAAATCGTTA	G228A,A572G	51.27	12.29	5.71	1.87	27.33	1.54
895	AGATTAAACATATCA	G73A,A156T,G243A,G318A,A343G,T351A,A371G,C478A,G517GC,C552A,G593T,T628A,C703G	25.94	29.44	3.28	0.93	39.25	1.17
896	AGATTACGGATGCTC	G172T,C442T	17.99	54.94	2.55	0.96	22.25	1.3
897	AGATTCCAGGCGGTG	G73A,G691A	28.13	0.73	0.18	30.13	40.65	0.18
898	AGATTCGAAACTCTC	T650C	58.07	4.79	3.19	3.48	28.45	2.01
899	AGATTCTGCGCACTT	C231T,A365G,G524A	1.57	0.22	0.22	15.88	48.1	34.01
900	AGATTGAGAAATAA	T420A	34.39	49.04	2.59	0.61	11.97	1.4
901	AGATTGTTGTGTATA	WT	67.99	5.02	4.76	2.38	17.2	2.65
902	AGATTTAGTAACTGG	A101G,C588T,T650C	57.91	3.38	5.3	3.2	28.34	1.86
903	AGATTTATTTACAAC	G192T,C269T,A285G,G331T,T401C,A408T,C468A,C478T,T509G,C588A	16.76	0	2.2	13.46	50.82	16.75
904	AGATTTGACTGAACT	A191G,A202G,G258A	52.82	11.51	5.33	1.47	26.46	2.41
905	AGATTTGGTGCTTGC	T42C,T432A,A474T,T509A	71.69	1.24	4.36	4.78	15.96	1.96
906	AGATTTTACAGTGAT	T84C,G99A,A203T,C312T,T605A	51	14.98	3.16	2.98	23.19	4.69
907	AGATTTTGCGAGACA	G670C	65.37	7.48	7.06	2.63	14.96	2.49
908	AGATTTTGTAAGACC	C157T,A226G,G305T,C339T	63.72	14.18	3.34	2.58	13.96	2.22
909	AGATTTTTGTCAGCA	T174C,G555A,A580T	66.82	11.13	5.35	0.86	12.42	3.41
910	AGCAAAAGCCCACAC	A59G,A78G,A188G,G331T,A371T,G379T,T498C	66.68	0.58	4.1	3.12	23.01	2.52
911	AGCAAGCAATAGTGC	TG669T	68.93	10.27	4.1	1.92	12.06	2.7
912	AGCAAGGTATGACTC	WT	63.34	6.71	6.45	2.11	19.2	2.18
913	AGCACAGTTAGACTG	A156G,T333C,A356T,A368G	74.45	3.6	4.59	2.79	12.28	2.29
914	AGCACCCTATCTCGC	A191G,T274C,G318A,C512T,T634A	58.63	12.85	8.03	0.81	17.27	2.41
915	AGCACGAATATAACT	T508A	64.46	6.26	4.53	2.34	19.31	3.1
916	AGCACTACGATATGA	G210A	57.47	3.43	4.8	2.19	28.81	3.29
917	AGCACTTTATAATAA	C468A,A590G,A653G	39.11	11.07	1.03	6.23	39.11	3.45
918	AGCAGAGACCCACAT	WT	64.21	6.79	5.38	1.56	19.82	2.25
919	AGCAGGTAACAGAAT	WT	65.87	5.45	5.72	2.5	18.05	2.41
920	AGCAGTTAGATTTGC	A78T,G366A,A609G	58.82	11.24	6.05	1.84	19.68	2.37
921	AGCAGTTCCTGTCTA	T122C,T419A,G636A	68.25	7.58	6.02	2.64	13.33	2.17
922	AGCATACTGAGAGCT	C261T,G426T	50.72	10.39	4.63	1.6	21.13	11.53
923	AGCATAGGGGTTATA	G72T,G112T,A120C,G271T,T274C,A542G	69.04	1.49	4.02	5.14	18.52	1.8
924	AGCATGACGTGTTAG	G103T,T241C,C307T,G387A,T440C,T631A,G644T,A681G	12.93	60.11	0.9	1	23.1	1.96
925	AGCATGAGCCGTCAT	WT	61.01	7.48	5.65	2.86	20.36	2.63
926	AGCATGCTTACGGGT	WT	66.2	6.9	6.02	2.21	16.73	1.95
927	AGCATGGCTGACCCC	G75A	66.28	6.67	5.04	2.16	17.68	2.16
928	AGCATGTCAATTCAC	T293A,C424G,G499A,C646T	2.76	37.08	1.47	0.27	43.34	15.09
929	AGCATTAAATCCACT	C92A,A425G	46.69	23.9	5.51	0.74	22.43	0.74
930	AGCCAAATCCATTAA	T625A	52.25	7.53	4.34	2.75	31.79	1.34
931	AGCCAAGAATTTTAA	T218C,C412A,C436A,G444A,T504C,A541T	1.26	3.35	0.21	2.52	90.35	2.31
932	AGCCAATAATGAGAA	C295T,T392C	50.02	22.05	4.66	1.4	19.78	2.09
933	AGCCAATTGTTAGAA	T31A,A483G,T565C	70.82	5.77	6.88	1.7	12.41	2.41
934	AGCCAGTGGTGGAAG	A101G,T131A,T655C	65.74	5.87	5.67	2.52	18.54	1.65
935	AGCCATAGACAAACT	T38G,G72A,C157T,C159A,G227T	70.02	6.54	4.25	2.04	14.7	2.45
936	AGCCATAGCAAGGTC	A152T,G471A	51.7	13.06	4.34	2.29	26.14	2.46
937	AGCCCGGGCGACAAC	C577T	57.6	3.42	2.27	3.83	30.71	2.17
938	AGCCCGTAAGTTATC	T280A,T347A,A358C	28	27.84	4.32	2.08	33.92	3.85
939	AGCCCTACACTCCGT	G313A	38.62	23.31	4.29	1.14	28.9	3.73
940	AGCCCTCTTAATCCG	A156T,G566A	68.26	6.02	5.84	1.39	16.91	1.58
941	AGCCGCACGTGTTAA	T293A,A385G,A477G,T660C	2.57	52.95	2.01	0.3	32.5	9.67
942	AGCCGCCTGATCAAG	G79T	69.28	7.02	4.35	1.9	14.98	2.47
943	AGCCGGCAAGTTTCA	C34T,A147C,T277C,G346T,T548A,G639A,G676T	61.59	8	5.45	2.44	20.19	2.33
944	AGCCGTTAAAGCCAA	C85G,G103A,T179A,A323C,C453T,T509C,A523T,G574A,G584T,G595A,C652T,A667T	0.77	0.15	0	4.64	21.8	72.65
945	AGCCGTTTACCAGGC	C135CT,A214T,G318T,T616G,T634A	66.51	1.94	4.85	1.94	23.3	1.46
946	AGCCTATTACATGAA	G259T,T274A,C497T,T516C,T672A	61.61	0.96	4.55	11.31	17.27	4.3
947	AGCCTCTGATCCTGA	G319A,G387T,G433A,T446C,C454A,A592G,G636C,T688A	0.85	74.87	0.17	0.17	23.25	0.68
948	AGCCTTCGCGTTTTG	A337T,G387A,C576T	41.65	23.46	3.89	1.38	26.89	2.73
949	AGCCTTTAAGCGCTC	A118G,C121A,A416G,C455T,C458T,T586A,G614A	63.83	9.07	5.26	1.44	18.74	1.67
950	AGCGAACTCTTTATA	WT	65.79	6.59	4.52	2.54	18.25	2.31
951	AGCGAATCGTCTTTA	WT	63.12	6.98	5.83	3.49	18.91	1.67
952	AGCGAGGGAAGCGTA	T86C,T280G,C286T,C336A,A416G,C596T	0.87	85	0.23	0.04	13.07	0.79
953	AGCGATAGTAGTATA	WT	63.69	8.04	5.42	2.18	18.9	1.76
954	AGCGATTATTCGGCG	G112T,T179C,T504C,G517A,T634A	8.28	0	0	14.48	66.22	11.02
955	AGCGATTCTAACCAT	G30A,T116A,C158A,T240A,G544A	59	6.51	8.32	2.72	20.88	2.57
956	AGCGCGAGGGGGGCC	T179A,A456T,A533T,G555A,A689G	67.76	9.36	4.78	1.15	14.14	2.8
957	AGCGCTTGGGAAGTA	TG70T,C273T	71.2	4.49	4.73	2.49	14.96	2.13
958	AGCGGCAGTGTGAAG	WT	64.38	7.34	5.48	2.15	18.77	1.87
959	AGCGGCGGGGGCAAG	WT	66.97	6.49	4.63	2.03	17.51	2.37
960	AGCGGGAATCGGAAC	A82T,G104A,T317A,A337G,CA442C	0.93	52.73	0	1.88	21.48	22.98
961	AGCGTATAAAGCGAT	G56A,A356T,C527T	54.66	7.45	5.18	3.06	28.31	1.34
962	AGCGTCATACAAATG	WT	68.8	6.01	4.17	2.13	17.24	1.64
963	AGCGTGTGGAGTAGC	WT	65.32	6.81	6	2.07	17.88	1.94
964	AGCGTTGCACTTTCG	T386C,C418T,C618T	64.79	13.91	4.25	1.46	13.54	2.05
965	AGCGTTTGATTATCT	T302C,T303C,A365T,A483G,G633C,C646T	85.09	0.86	3.47	2.47	6.9	1.21
966	AGCTACCTTGTATTA	C703T	56.52	6.65	7.36	1.9	24.94	2.64
967	AGCTACCTTTAGTTT	T162C,A416G	55.96	16.76	3.91	3.14	18.71	1.52
968	AGCTATACACGGTTC	T137C,C292A,C410T,CT603C	10.13	72.89	1.48	0.35	12.27	2.87
969	AGCTATACTACAAG	C63T,A252G	52.98	20.89	4.77	2.24	15.82	3.29
970	AGCTATATATCGTCT	T543C	62.55	10.28	6.78	1.27	15.65	3.48
971	AGCTCAAATTGCACT	G100C,G328A,G499T	55.3	7.08	5.12	3.44	27.09	1.97
972	AGCTCCCGTCTTCAC	T255C,C367T,G461A,A578G	46.1	32.71	3.9	1.06	13.9	2.33
973	AGCTCTGGTACTACT	C121T,T669A	59.4	5.21	5.03	2.47	25.86	2.03
974	AGCTGATGGATGTCT	T389C	73.53	2.39	5.03	2.59	14.85	1.61
975	AGCTGTGCGCCTCGA	A428G,T557A	27.5	54.83	3.31	0.47	12.84	1.04
976	AGCTGTTAATACTGT	G68A,G98C,G172A,C197T,T308A,T491C,T498C,G569A,T625A,C649T	61.56	4.77	3.15	5.44	20.71	4.37
977	AGCTGTTGCAACAAT	C62A,T401C,A408G	62.75	2.79	6.51	4.29	22.34	1.31
978	AGCTTAGTAAGCATC	A209T	59.49	6.67	6.09	2.57	23.2	1.98
979	AGCTTCTATAGCGTT	T116C,G391C,G452A,G510A	68.76	6.55	5.05	2.18	15.68	1.79
980	AGCTTCTGTGTACCA	G479T,T688A	49.79	9.51	3.48	2.76	31.72	2.75
981	AGGAAAGTTACTTCT	A368G,C454T	57.96	10.51	5.01	2.25	23.03	1.24
982	AGGAACGCATCATCG	A57G,T216C,C405A,A462G,C567G,G679T	38.71	0.18	2.69	10.22	47.49	0.72
983	AGGAATCACCTAGTC	T302C	67.13	5	5.96	3.33	17.38	1.2
984	AGGAATTTCCTTTTT	A358G	5	78.74	0	0	12.5	3.76
985	AGGACAGATGTACAA	C33T,T516A	7.51	1.88	0.23	24.65	46.24	19.49
986	AGGACGGCATATCAG	T625C	66.61	5.94	5.29	2.24	17.91	2.02
987	AGGACTGGGGTCATT	A425T,C514T,A523T,G531T,T539A,A547G	0.61	0.22	0	8.99	8.41	81.77
988	AGGACTTAATAGAAT	T136A,T699C	62.53	6.09	8.07	1.89	19.51	1.9
989	AGGAGACGTGGGCGA	A533T,T625C	68.33	7.64	5.14	1.94	14.28	2.67
990	AGGAGCCACCCTCCA	A203G,G378A,G569C,C668A	71.21	2.37	6.27	1.82	15.96	2.36
991	AGGAGTGAATCCCTC	G112T,G245C,A296T,A365G,G488T,G617A,T631C,G644T,C652T,A681G	0.82	71.43	0.19	0.06	27.26	0.24
992	AGGATAGTATGCCTT	WT	60.37	7.04	6.3	2.96	21.85	1.48
993	AGGATATCCAAATAT	T74G,A358T,T605A,A682T,T697C	42.6	16.04	1.76	2.5	32.83	4.27
994	AGGATATTCCTGCCC	T302A,G332A,A365G,T491A	76.36	0.52	6.5	4.93	11.17	0.52
995	AGGATCCTGTATTAT	A166G,G540A,G617C	50.49	2.44	2.9	6.92	31.9	5.35
996	AGGATGTGGAGTCG	G76A,C406T,C450T,C512T	83.42	2.65	4.69	1.51	5.07	2.67
997	AGGATTATTATAGAC	WT	63.34	7.44	5.4	3.23	18.61	1.97
998	AGGATTCTAAGTTGT	A236G,T283C,TG459T,T550A,T643C,T660C	33.67	33.89	4.88	2.18	24.2	1.16
999	AGGATTGATGAAGTT	G387T,C423T,T432A	72.04	6.28	4.31	2.11	12.34	2.91
1000	AGGATTGATGATTTG	G163A,C602G	67.8	5.84	6.03	1.99	15.79	2.55
1001	AGGCATTCTTCGTCC	A238T,G297T,G444T	0.36	95.37	0.06	0.03	3.85	0.33
1002	AGGCCACCCATTCCT	C286G,G326A,G461A,T553A,T605C,A648T,T704C	21.8	44.3	4.15	2.07	25.95	1.73
1003	AGGCCAGGAGCAGGG	C453T,G629T	59.59	9.87	5.3	2.28	21.43	1.53
1004	AGGCCGATGGATGGG	C142T,C266A,C396G	57.33	6.95	12.53	1.62	19.98	1.61
1005	AGGCCTACTAGGTGG	T545A	61.58	8.33	6.02	2.08	20.14	1.84
1006	AGGCCTCTTTCACAA	C367T,A592C	52.36	16.11	5.27	1.51	20.62	4.14
1007	AGGCCTTTATGTCTT	T620C,A663T	63.5	4.93	4.64	3.2	22.66	1.06
1008	AGGCGGGAGAGGCGC	WT	63.36	6.86	5.02	2.76	20.28	1.7
1009	AGGCGTGAAATTAGT	T53C,C63T,T302A	59.03	9.6	6.83	1.39	21.74	1.41
1010	AGGCGTGACGCCCAT	A147G,A177T	58.37	3.34	6.49	2.09	28.87	0.84
1011	AGGCTAATCGAGTTC	T126C,G349A,G414C,A475G	78.3	0.3	6.07	3.19	10.47	1.67
1012	AGGCTACGGGGGTTC	WT	62.96	8.21	5.53	1.59	19.45	2.25
1013	AGGCTCTCGCATTTC	C164T,T317A,T394A,G575C	51.39	18.25	6.48	1.22	18.82	3.83
1014	AGGCTTTTTGAGTCA	C612A,T628A	61.51	2.52	5.99	4.42	24.92	0.64
1015	AGGGAAATAAAGTTA	G87A,T280C,C400G	18.14	25.79	8.62	0.67	43.99	2.79
1016	AGGGACTGTGCCTGG	A408G,G501T,C624A	70.86	5.83	9.13	0.84	12.08	1.26
1017	AGGGAGCGTGAGCGG	C164T,T255A,C615A,G657A	73.35	5.05	3.61	2.58	14.06	1.35
1018	AGGGATCCTTCATTC	T401A,A475G,A597G	67.58	5.53	5.28	2.38	18.09	1.14
1019	AGGGATGTCTTCAAA	A65T,C400T	67.66	6.44	5.09	1.7	15.9	3.2
1020	AGGGCAAACTAAGTG	T122A,T335C,G350A,T581C	81.54	0.51	4.87	2.54	8.32	2.23
1021	AGGGCGAATTAAAAT	T140C,T162C,G239C,T302C	70.53	4.4	5.87	2.28	15.15	1.78
1022	AGGGCGAGGAGCGAT	G73T,G89A	67.09	6.66	5.3	0.98	17.64	2.33
1023	AGGGCGTTAGGTTAT	T31A,A59G,A251T,A580T,T669C,C687T,T692C	5.92	1.48	0	18.52	74.08	0
1024	AGGGCTTTTACTATT	A338T,T374C,G635A	52.93	12.13	2.09	1.88	29.5	1.47
1025	AGGGGAGGGGCGGTG	C64A,G639A	65.25	6.82	6.7	2.02	15.9	3.31
1026	AGGGGGGGCGGGAGA	C158G,A338T,C642T,C649G	65.8	6.79	2.87	1.57	21.41	1.56
1027	AGGGGGTTCACTACC	G81A,T604G	68.42	3.82	3.85	3.92	18.71	1.26
1028	AGGGTAAAATCCACT	A167G,A301T,GC517G,C640G	35.92	1.22	1.63	17.14	41.63	2.45
1029	AGGGTATAGGATAAC	T153C,A191G,A203G,C454T,C478T,T634A,T643A,G673T	57.65	9.12	3.24	1.76	27.94	0.29
1030	AGGGTGCGTGATGGC	A572G	63.44	5.98	5.55	2.75	20.91	1.36
1031	AGGGTTACTTAATGC	C269T,T390C,A416T,C646T,T666C	64.37	1.46	2.48	11.97	19.12	0.59
1032	AGGGTTAGATTCTCA	C149T,T179A,T392C	64.62	6.32	5.51	2.34	20.13	1.08
1033	AGGGTTATTTTCGGT	TG498T	26.39	2.19	1.78	9.6	39.34	20.7
1034	AGGGTTCTTGTATTA	T283C,A365T,T545C,T638C	38.8	13.13	10.19	1.56	31.37	4.95
1035	AGGGTTTGGTATTGG	T270C,G297T,G377T,T440A	0.64	84.22	0	0.05	14.79	0.3
1036	AGGGTTTTAATTTGT	G284A,T308G	55.6	12.13	6.03	2.04	21.32	2.89
1037	AGGTAAGGCATTTAG	A78G,T179C,G350A,T409C,C567A	76.65	0.47	4.67	5.37	10.75	2.09
1038	AGGTAATGGTGCCAT	WT	64.88	6.99	5.05	1.59	18.96	2.52
1039	AGGTACTCATTGATA	C64A,C139T,A194G,T392A,C530T,T536A,T643G	51.3	0.87	3.48	4.35	31.3	8.7
1040	AGGTAGCGGTCATCA	T131C,C178T	64.71	8.5	3.92	1.96	20.26	0.65
1041	AGGTAGTCCGACCAT	A181T,T293C,T459A,T634A	63.81	6.66	7.81	1.91	18.29	1.53
1042	AGGTATTGGTTGGTG	G128C,A220G,G229A,T303A,G461T,T625C,G647A,A653T	53.11	9.63	3.82	2.76	28.6	2.08
1043	AGGTCAGAAGTATC	T321C	79.29	4.06	2.51	2.22	11.12	0.79
1044	AGGTCAGTGTCAGTC	G457A	69.95	5.06	6.18	1.12	16.01	1.68
1045	AGGTCATCACCGAAT	C397A	74.33	1.79	5.35	2.57	13.29	2.67
1046	AGGTCCATAACGCAG	A580T	67.05	4.25	4.16	2.93	19.44	2.17
1047	AGGTCTACTTGACAG	G332A,C458G,G651A	78.15	0	5.23	5.23	10.15	1.24
1048	AGGTCTTTCACTTTG	A220T,G499A	62.19	8.71	4.9	2.03	18.78	3.38
1049	AGGTGCCCGGCGTAC	T130C,C436T,T440A,G488T,G563A,T616A,T638C	37.85	0	2.83	2.26	47.46	9.6
1050	AGGTGCCTGCACTCA	T131C,T153C,C393T,C455CA,C587T	45.06	17.13	4.59	1.91	28.42	2.89
1051	AGGTGGAAAGCGCCA	A96T,A477G,G525A,G693A	56.97	2.62	4.19	4.94	26.1	5.19
1052	AGGTGGAGTAACAAA	G239A,T557C	64.58	9.59	6.58	2.21	14.13	2.91
1053	AGGTGGGTGATTACT	C41T,A256G,G538A,A578G	66.63	3.84	7.47	1.65	18.03	2.39
1054	AGGTGTATATGCGGT	C155T,AG232A,G319C,G350A,A408T	78.1	0.33	5.91	3.77	10.16	1.73
1055	AGGTTATACCTATGA	C63T,TG498T,T543C	34.46	6.57	3.05	6.57	34.77	14.59
1056	AGGTTATCTTAGAGA	T90C,T122C,C157A,G298A,G427T,T565A,G676A	3.46	78.96	0.58	0.25	13.18	3.57
1057	AGGTTATTGTTAGGA	T126C,G569T	65.96	7.08	6.67	1.16	16.41	2.73
1058	AGGTTCAGCACATCA	C630A	64.09	7.35	6.53	1.53	18.53	1.96
1059	AGGTTTTCCAACTTC	C92T,C398A,G525A	68.54	1.16	2.49	3.64	17.88	6.29
1060	AGGTTTTGAACTGTG	C157T,C404T	68.94	9.71	2.91	2.18	12.38	3.88
1061	AGGTTTTTACCTCCA	WT	61.32	7.13	7.13	2.55	20.61	1.27
1062	AGTAAACAATCACAA	A167G,A256G,C442A,T704A	77.95	1.56	5.51	0.9	12.84	1.23
1063	AGTAAACTTTTTAGA	G66A,G656A	67.17	5.02	4.34	3.15	18.67	1.64
1064	AGTAAAGGAATTTAT	G377A	67.56	3.02	6.26	2.34	18.65	2.17
1065	AGTAAAGTTTAATGA	A147G	61.8	6.36	5.83	2.28	21.82	1.89
1066	AGTAACCTTTTTCGC	T655C,C703T	66.61	6.47	5.62	2.27	17.38	1.65
1067	AGTAAGTGCACTATC	T302A,T361C,C423T,G480A,G529A,C552A	13.03	28.72	1.16	0.83	45.58	10.68
1068	AGTAATATATCAAGA	WT	62.13	6.17	6.46	2.03	20.91	2.32
1069	AGTAATCAGTGTGAT	G233A,C269T,G275C,G322A,T354A,C552A,C567T	59.58	2	3.99	2.7	31.02	0.7
1070	AGTAATGCCTAATTC	C415A	67.68	2.63	6.82	2.72	18.84	1.3
1071	AGTAATTAGCTGGAC	WT	63.96	5.88	6.11	1.6	20.46	1.99
1072	AGTACATTCTCAATT	T42A,G104A,A338C,G342A,A416G,G445C,T508C	0.6	85.39	0.12	0	12.81	1.08
1073	AGTACGACTGGTATA	T108G,A177G,C364G,G391A,G452A,G575A	53.88	13.36	6.9	3.02	17.24	5.6
1074	AGTACGGCAGATTTC	C489T	65.03	9.65	5.03	2.1	17.2	0.98
1075	AGTACGTTTTAATAA	T429A,A597G,T613A,T616C,T661C	62.28	10.81	3.29	3.29	16.85	3.47
1076	AGTACTATTGCTCGG	G417A	64.55	6	7.17	2.14	18.77	1.37
1077	AGTACTGCCGGACCT	T173C,A209T,C339T,A383G,A416G,T528C,G555A,T565C	16.74	60.94	3.07	0.56	17.99	0.7
1078	AGTACTTCTTTTATG	C307A,A425T,T608C,A663T	60.04	6.55	5.02	2.62	18.99	6.78
1079	AGTAGAATCATTTTA	C121T,G297T,G433A,T440A,G441A	0.36	84.13	0.07	0.11	14.79	0.54
1080	AGTAGCGCAGTGGTC	T283A,G318A,G427T	0.97	76.63	0.4	0.07	18.37	3.55
1081	AGTAGCGTCCATATA	A199T,G311A,GA355G,C497G,T509C,C511A,A592T,C642A	64.47	0.36	3.35	18	11.8	2.02
1082	AGTAGCGTGGGATGG	C36T	65.53	7.49	4.28	2.39	17.82	2.51
1083	AGTAGGAATAGCTAG	A96T,C278T,C345A,T394C,A438T,G487A,C646T	45.81	3.91	2.23	2.79	42.46	2.79
1084	AGTAGGTAGGCGAAT	WT	62.71	6.19	5.45	2.92	20.89	1.84
1085	AGTAGGTATCTTTT	C642A,T643A	70.01	6.14	3.36	2.63	15.79	2.06
1086	AGTATCAGTTCCTCG	G67A,A236G,A251G,C292A,C478T,T545C,G584A,A594T	12.86	64.23	2.4	0.43	17.5	2.58
1087	AGTATGATGGAGTCA	T186C,T429C,A513G	NA	NA	NA	NA	NA	NA
1088	AGTATGCATACTAAA	C165T,T277C,G487T	52.96	6.3	9.2	1.77	27.36	2.4
1089	AGTATGTACGTCATT	C121T,G229T	47.28	13.25	5.45	1.24	30.2	2.58
1090	AGTATGTGAGGTAAG	G230C,G271A,C400G,T638C,T661A	73.49	3.28	5.15	2.55	14.26	1.27
1091	AGTATTGTGTTGGAG	C149T,A191T,T341C,T361A,A475G,C527A,C662A,G683A,G686A	43.25	1.3	3.91	7.61	43.25	0.67
1092	AGTCAAAGAGCTTAT	A209C,TG308T,T545A,C570T	63.95	1.08	5.78	4.31	23.6	1.28
1093	AGTCAAATGCATTAG	A232G,C273A	78.63	2.25	3.3	3.59	11.28	0.96
1094	AGTCAACCTTTAACG	G196A,T605C	64.58	7.76	6.46	1.76	17.16	2.28
1095	AGTCAATATTTGGAA	C591T,A689G	63.74	4.31	4.73	3.94	21.58	1.7
1096	AGTCACGACTTTTTA	C157T,A337G,T401C,C405T	76.81	1.85	5.29	2.18	11.43	2.43
1097	AGTCACGTGATGATC	G311A	85.01	0.59	3.2	3.16	6.93	1.12
1098	AGTCATACAATTAAC	G123A,T516C	63.5	5.96	5.62	2.5	20.54	1.88
1099	AGTCATGACTTGTCA	T86A,C121G,C146T,A513T,G540T	56.68	3.88	3.59	4.16	31.13	0.56
1100	AGTCCCGGCCCACTT	C295T,A592T	54.1	19.55	4.53	0.83	18.59	2.4
1101	AGTCCGCAAGAACCT	G79A,TC409T,T621C	64.74	12.54	2.93	2.6	15.06	2.12
1102	AGTCCGTGGACGTCT	A83G,G372A,T491C,A494T,A523T,T628C	0.77	0.33	0	6.97	22.82	69.1
1103	AGTCCGTGTTTGTTT	T351A,T401A,T465A,G639A	76.85	1.18	5.27	2.51	11.82	2.37
1104	AGTCCTAATTGAATT	A177T,A246T,T669A	56.34	7.1	6.09	3.56	25.89	1.03
1105	AGTCCTGCACAACTC	C281T,T440C,G524T,A542G	0.84	0.84	0	17.07	22.23	59.02
1106	AGTCCTGTGCCACAA	A44T,A88T,A232T,TG274T,A385G,T409C,G430A,A475G	21.99	28.8	13.09	1.57	31.41	3.13
1107	AGTCCTTGGTCATAA	T308A,A648G	59.81	2.95	4.03	2.41	28.94	1.87
1108	AGTCGAGCAAGTAAA	G30A,T53C,G566A	60.34	6.33	7.31	2.11	21.52	2.39
1109	AGTCGCCCGGCAAAC	A147G,A181G,TA218T,G569A,A594C	59.32	10.59	5.57	2.23	18.66	3.63
1110	AGTCGGAGTGCCGAT	A462C	60.29	23.66	3.08	1.07	9.5	2.38
1111	AGTCGGGCTTCGATT	WT	70.19	4.83	5.18	2.24	15.43	2.13
1112	AGTCGTATTCATAAC	G104A,T179C,A226T,C312T,G626A,T631C,T650A	43.95	24.74	5.52	1.05	20.26	4.47
1113	AGTCGTCAAGGATCG	WT	68.36	6.22	5.19	1.79	16.42	2.02
1114	AGTCGTCAATAGTAT	WT	67.12	5.99	5.46	1.62	17.93	1.87
1115	AGTCGTTTATCTGTA	T102C,G260A	65.17	7.81	4.87	1.76	18.29	2.09
1116	AGTCTACTTACTTGA	G109T,A232T,T697C	61.04	4.36	5.55	3.96	23.59	1.5
1117	AGTCTATCATTTACT	T102C,T179C,T327C	74.93	0.78	6.18	4.08	12.92	1.1
1118	AGTCTATGTCTCACA	T300C,G387T,C423G,A541T,A594T	47.07	15.59	2.86	2.43	31.04	1
1119	AGTCTCACATCTTCA	C503T,G599A	56.26	4.02	2.78	6.61	25.11	5.21
1120	AGTCTCCTAAATTCA	T46C,A191G,G319A,A334G,A494T,T581A,G607C	72.91	1.61	3.38	2.32	18.53	1.25
1121	AGTCTGTCTTTTTTA	A451T,G480T	44.9	13.85	3.32	3.41	24.48	10.04
1122	AGTCTTATTTAAATG	C94T,GA250G,G304A,A447G,G461T,C589T,T704A	3.92	78.4	0.4	0.18	16.27	0.83
1123	AGTCTTCGTTCTTTT	G134T	73.29	5.24	4.08	1.85	13.31	2.24
1124	AGTGAACCTAGGTAA	C424A	42.36	22.7	4.07	1.49	23.66	5.71
1125	AGTGAATAATGTGAA	G510A	69.59	6.02	6.61	1.92	14.4	1.46
1126	AGTGAATATGACATC	A220G,T440A,G582A	41.41	2.43	2.51	4.08	49.22	0.35
1127	AGTGACCCGATCTTT	A578T,G690T	70.48	4.1	1.39	4.75	18.18	1.1
1128	AGTGACTTAACGCCC	G30A,A282G,A408G,G559A	13.05	27.41	3.18	0.55	49.77	6.04
1129	AGTGCCTAGGACAAA	T116A,T401C,T528A,C675T	53.85	2.33	3.93	4.51	34.49	0.89
1130	AGTGCTCGTCGGATC	T86C,G99C,A578G	62.7	9.3	5.64	1.24	18.08	3.04
1131	AGTGCTGATTTTTCT	A156T,A224T,G346A,G378A,A443G,T446C,A513G,G538C,T557C,A597G,C700A	0.59	79.49	0	0.15	11.44	8.33
1132	AGTGGACAAGACACG	T162A,A299T	75.81	3.2	5.34	2.95	11.42	1.28
1133	AGTGGGAGCGAAATG	G80T,G104A,G234T,C454T,T498A	48.33	34.95	2.45	1.25	8.8	4.22
1134	AGTGGGGTATTCTTA	WT	65.92	5.2	6.27	2.09	18.35	2.16
1135	AGTGGTACGGGACTG	AC59A,C133A,A203T,T291A,G331C,G350C,T351A,G366A,A408T,T420C,C577A,G645A,T655G	20.84	22.16	4.77	1.67	41.8	8.77
1136	AGTGTAACCCAAATA	WT	65.88	5.87	6.59	1.21	17.73	2.72
1137	AGTGTAACGAGATCT	T137C,A492G,G500T,C522T,G629T,T631C	72.01	9.57	3.66	1.54	9.71	3.51
1138	AGTGTACACCTTAAA	A88G,G342C,A343G,G349A,G355T,A368T,G426T,G460A,A494G	35.53	25.61	3	2.07	30.37	3.43
1139	AGTGTACCACCTTTC	WT	64.4	6.73	5.58	2.33	18.97	1.99
1140	AGTGTAGATCCTCGT	A246T,A282G	8.42	58.9	1.98	0.74	25.99	3.97
1141	AGTGTTTGCTGTGGT	T115A,T302C,T341A,G444T,C615G	1.59	85.05	0.08	0.27	12.31	0.7
1142	AGTTAACATCGTTTT	T650C	61.04	3.36	4.01	2.99	27.4	1.21
1143	AGTTAATACGGTCGA	A120T,G457T,T616C	70.12	4.5	4.36	1.91	17.76	1.35
1144	AGTTAGAATACGAAG	A160T,G346C,C624A	19.63	40.19	1.41	0.47	1.86	36.45
1145	AGTTAGATACAGTTT	G639A	65	7.88	6.51	2.8	14.62	3.19
1146	AGTTAGATGATCTTT	G319A,A590G	71.49	4.16	4.89	2.4	14.95	2.11
1147	AGTTAGGACTACAACG	A105G,T347C,A425G,T562C,G683T	61.29	11.96	3.95	1.8	19.59	1.4
1148	AGTTAGTACATGAAT	T31C,AC285A,T325A,G352C,G499A	49.87	6	5.88	2.35	32.22	3.67
1149	AGTTATCTGAGTTTC	G91A,A203T,C503A	32.8	3.5	1.59	8.6	49.04	4.46
1150	AGTTCACACAAAGTG	TG50T,T186C,A214T,G304A,C407T,AG494A,A648G	NA	NA	NA	NA	NA	NA
1151	AGTTCACTTTGAATA	C92T,AC156A,GC517G,A667G	43.32	1.64	2.22	9.09	37.9	5.82
1152	AGTTCATACCGCCTC	C55T,G66A,C424A,T498A	47.76	21.78	4.07	1.85	19.08	5.46
1153	AGTTCCACCTAATCT	C269T,T325A,G346T,T669C,C675T	66.86	3.65	4.23	1.9	22.48	0.88
1154	AGTTCCGTTGACTCT	T137A,G161T,T325A,C453T,A473T,G563C,C615T	55.42	11.76	2.45	2.25	27.47	0.65
1155	AGTTCGTCCCTAGGT	T218A,G245T,T267A,C320T,T325A,C521T,T562A,G664A	55.61	21.12	3.29	1.81	16.24	1.94
1156	AGTTCTATAGATTCC	T86C,T90A,G297A,G353A,C519T,C570T,A592T	1.27	21.15	0.72	0.36	74.86	1.63
1157	AGTTCTATGATGAAC	C114G,A385T,A609G	60.34	10.61	5.72	2.15	18.65	2.54
1158	AGTTCTATTTCATTT	G89A,T317C,C407T,A513G,C649T	67.34	3.45	5.04	3.96	18.15	2.06
1159	AGTTCTCGTTTTCAC	G342T,C434T,T625C	49.99	15.97	3.35	0.8	18.69	11.19
1160	AGTTCTGAAGATCAG	WT	67.75	7.74	3.43	2.52	15.86	2.7
1161	AGTTCTTATGAATCC	A416T	68.53	6.57	4.73	2.17	16.15	1.85
1162	AGTTGAATATAATTC	G80C,G366T	62.83	11.7	3.9	2.45	17.17	1.95
1163	AGTTGATGAATCGAC	T162C,A253G,GC433G,A590G,AG678A	59.62	21.7	3.04	2.25	10.04	3.34
1164	AGTTGCAAACAAGA	T39C,T610G,T650C,T655A,T704C	58.05	3.23	2.42	4.03	28.23	4.04
1165	AGTTGCATTGTGACT	C198T,C450T,G656A	75.89	2.32	4.59	2.61	13.58	1
1166	AGTTGCCTGGCCTTA	G537A	38.45	2.59	1.72	5.52	50.01	1.72
1167	AGTTGCTCTAAGATG	T201C,C598A	62.38	8.31	5.84	2.26	18.67	2.54
1168	AGTTGGTATCTACTG	G30A,G259A,C312T	46.81	18.76	3.16	1.54	27.46	2.28
1169	AGTTGTATACATTAG	C519T	59.2	3.65	4.69	2.44	26.61	3.41
1170	AGTTGTCGTGAAGAG	G340A,T351A,T389C	78.87	1.76	4.29	2.52	11.27	1.29
1171	AGTTTAAGAGAACAC	WT	63.26	6.5	6.5	1.59	20.21	1.95
1172	AGTTTAGATTTTGTC	G99A,T136C,C155A,C168T,T347C,T553C,G645A,A685C	78.65	3.27	4.15	2.44	9.49	2
1173	AGTTTATACACGGAT	A59G,T289C	15.44	52.07	1.44	0.61	26.96	3.49
1174	AGTTTCAGGTGTTTA	T545A,T557C,T632A	67.99	7.29	5.78	1.97	14.2	2.77
1175	AGTTTCATATAGAAT	G35A,G230C	55.03	11.25	5.54	2.08	23.71	2.41
1176	AGTTTCATTGCCCTC	WT	65.81	7.87	4.56	1.87	17.52	2.37
1177	AGTTTCGCTTTATCA	T162A,A513G	64.38	6.31	5.51	2.93	17.85	3.02
1178	AGTTTCTGTATTTG	T48A	63.81	12.23	5.02	2.17	13.4	3.36
1179	AGTTTGAGGGCTCGC	T509A	64.62	5.97	5.53	4.03	16.86	2.99
1180	AGTTTGGCAACCTCT	C157T,C424T	46.31	23.67	3.89	1.29	21.99	2.85
1181	AGTTTGGTAGCTGGA	C279A	62.2	6.92	7.53	2.32	17.39	3.64
1182	AGTTTGTCTACGTAT	G32A,T274C	64.92	5.94	4.91	2.29	20	1.93
1183	AGTTTGTGATTTTTA	G366A,G480T,A485G,C522T	46.22	31.67	3.15	1.36	15.66	1.94
1184	AGTTTTATATAACAC	T39A,T53C,G242A,T247A,G297A,C403T,T446C,T528C,T638A	0.34	74.41	0	1.02	23.55	0.68
1185	AGTTTTATTTTCGTC	T390C,T643C	82.11	1.68	4.63	1.89	7.79	1.89
1186	AGTTTTGTCTCTCAC	A88T,C150T,G234T,G651A	45.74	22.58	4.52	1.51	23.73	1.93
1187	ATAAAACAATGTAAC	WT	66.15	5.97	5.75	2.51	17.38	2.26
1188	ATAAAATATTGCTTG	C64T,C93T,G294C,A416G,A560T	50.94	15.64	3.73	1.43	26.54	1.72
1189	ATAAAATTCCAGAAT	G123A,T162C,G395C	68.25	3.76	5.95	2.99	16.56	2.48
1190	ATAAACTTTATGTTT	A232G	67.4	5.07	5.65	2.32	17.83	1.73
1191	ATAAAGCGACTAAAC	C151T,G350A,C412A,A447G,C618G,G651A,A689G	42.01	33.41	1.91	3.48	17.16	2.04
1192	ATAAAGGTATAACTT	WT	55.96	5.6	9.73	2.19	24.33	2.19
1193	ATAAATAACAAATAT	T162C,A301G	62.77	7.74	6.37	2.34	18.92	1.86
1194	ATAAATATGCAATTA	G391C,T420C,G444T	0.75	84.43	0	0.16	13.54	1.12
1195	ATAAATCATTTTGGT	T115C,G196A,A572G	67.23	5.91	4.51	2.47	17.97	1.9
1196	ATAAATGAGTTCATA	A209G,A263G,T321C,A689G	68.25	2.64	3.77	2.26	21.3	1.77
1197	ATAACAGAAAATTGT	A141T,A191G	65.43	6.06	4.44	1.36	20.46	2.26
1198	ATAACAGTATTGATT	A323T,T374A,A416T,C637T	54.64	13.73	5.34	2.09	22.12	2.07
1199	ATAACATAGGGCCC	C107T,G113C,T509A,A653G	NA	NA	NA	NA	NA	NA
1200	ATAACATCCGGGCG	A82T,A156C,A202T,T225C,T255A,C396T	74.55	4.72	2.62	1.93	11.9	4.28
1201	ATAACCGATGGTGTC	T327A,C360T,C367T,C552A,G664A,G691A	5.63	2.82	0.94	3.75	85.91	0.95
1202	ATAACCTGTTTGCCT	T419C,G585A	65.82	5.46	7.98	2.01	16.02	2.72
1203	ATAACCTTAAATCGT	A236T,T389C,T516A	3.01	0.56	0	26.37	48.58	21.47
1204	ATAACGCCACAAAAT	WT	63.78	6.71	5.54	2.25	20.09	1.61
1205	ATAACTACCCTCTTA	C345T	43.85	21.54	4.1	1.54	26.15	2.82
1206	ATAACTCTTATCTTA	WT	62.09	5.89	5.38	2.22	22.87	1.56
1207	ATAACTTGGAGACCA	A682T,T692C	20.04	2.28	0.23	18.45	58.76	0.23
1208	ATAACTTTAGGACTG	G127T,T132C,C149T,G331T,G471T	69.48	2.51	5.33	2.93	18.82	0.93
1209	ATAAGAACGACTCAG	A156G,C367T,G379T,T672A	67.14	3.65	5.83	1.97	14.84	6.57
1210	ATAAGCACTGATAAA	WT	61.76	6.28	5.68	2.59	21.64	2.06
1211	ATAAGCGTCACCGA	T173C,C646T	71.94	5.28	1.63	1.63	17.07	2.45
1212	ATAAGCGTGGTATCT	TG386T,A425G	42.02	23.55	3.32	1.45	27.49	2.17
1213	ATAAGGCGTCGTGTT	G563A	54.97	2.78	3.37	3.32	34.2	1.36
1214	ATAAGTCTTGATATC	C61T,G87A,C266G,A282G,G566A,T634A,C687T	3.6	45.88	5.53	0.23	37.88	6.88
1215	ATAAGTGGTGTGGA	T532C	66.79	13.23	4.26	0.77	10.29	4.65
1216	ATAAGTGTACGTGTA	G297C,C489T,A558T	0.43	88.2	0.06	0.15	10.62	0.54
1217	ATAATACGAATAATC	G106A,C155T,C248T,G629A,A685G	59.29	6.72	6.13	2.8	22.83	2.23
1218	ATAATATGAAAAAAT	TG270T,G377T,T394C,C418T,T660C,T688C	60.91	1.89	7.97	2.46	25.65	1.12
1219	ATAATCGCTAGTATA	G99A,C138T,GC395G,T440A	61.52	9.53	3.25	5.19	18.94	1.56
1220	ATAATGACACCTCCT	T661C	66.3	5.28	3.56	2.05	20.72	2.08
1221	ATAATGCGAATCGAA	T317C,C434A,G452A,C518G	37.2	0.96	1.45	28.02	19.81	12.56
1222	ATAATGGCGCGGTAT	T361A,G441A,TC586T	58.49	16.46	4.3	1.35	14.5	4.9
1223	ATAATTATACAGTCA	WT	60.05	6.93	5.67	2.54	23.12	1.69
1224	ATAATTCGTAATACT	WT	63.31	5.81	6.1	2.62	19.77	2.4
1225	ATAATTGCGAATAGG	T351A	75.37	1.53	4.87	2.97	13.97	1.28
1226	ATAATTTGAATAATT	G95A,A202G	61.29	7.67	5.53	3.16	20.09	2.25
1227	ATAATTTTTTACAGC	G43T,C146T,A181G,T207A,T218C,G569A,C577A,C665G	NA	NA	NA	NA	NA	NA
1228	ATACAAATAAAAATC	WT	63.21	7.69	6.89	2.61	17.86	1.74
1229	ATACAAATCCAAACT	T38G,C193T,T308C,G319A,A385G,A425T,G449T,C502T,T704C	63.46	22.11	2.75	2.41	6.64	2.63
1230	ATACAAATGGAACTC	A199T,G233C,T409G,T491C,T650A	56.4	7.94	5.03	2.77	25.44	2.42
1231	ATACAACAATCCTCA	A220G,C520G,T539C,T548A,G573T,GA677G	65.44	7.34	2.06	1.92	10.2	13.04
1232	ATACAAGCTAAGATG	G100T,C178T,C396T	61.94	2.98	5.23	3.73	23.13	2.98
1233	ATACAATATTATTTA	G113A,T409C,G524T,A541G	1.28	0.41	0.15	4.85	13.34	79.97
1234	ATACACAATCTCGTA	T302C,T325A,A443T,G629A,C652A	10.64	70.09	1.24	0.56	16.61	0.86
1235	ATACACTATACAAAC	G52A,C237T,G346A	71.94	5.83	3.61	3.06	13.89	1.67
1236	ATACACTTTAAAACT	G499A,G505T	54.37	6.57	5.55	3.18	27.16	3.17
1237	ATACATGGGTATATT	A160T,C360T,A558T,T616C,T620C	48.61	18.52	6.02	2.78	20.83	3.24
1238	ATACATTACTTGCTT	T137C,A523T	1.47	0.37	0	7.48	24.27	66.41
1239	ATACATTATCACCG	T413C,G629C,T631A	67.5	11.86	2.86	2.46	11.86	3.47
1240	ATACATTTCCATGAG	C512T	70.97	8.12	5.93	1.33	11.98	1.66
1241	ATACCACTCCTAGAG	C41A,G635T	61.74	9.2	8.08	2.62	15.85	2.52
1242	ATACCATTCCGTGGA	G58T,T122C,T179C,A209G,C344G	40.58	16.67	7.25	2.17	29.95	3.38
1243	ATACCCATATAATGA	C400T	62.36	6.47	5.89	1.76	20	3.52
1244	ATACCCATTGTCTG	TC39T,A282G	10.33	42.07	2.53	0.24	42.07	2.77
1245	ATACCTGTCTATGTG	C150T,G190A,A251T,C265T,C530T,A535T	46.16	1.28	5.12	3.84	39.75	3.84
1246	ATACGAAGACCATCT	C119T,A456T,G481A,T516C,G645A	44.14	21.11	3.49	1.68	19.53	10.05
1247	ATACGACGGCCACTT	A542T	58.57	6.33	4.14	2.92	21.6	6.44
1248	ATACGCAGCCTAAGA	WT	64.68	7.79	4.15	3.07	18.24	2.07
1249	ATACGTAATGTTATA	T179A,T241A,C273T,A358T,A368T,C376A,G377T,GC422G,A462T,G544A,T557C,T628A,C642T,A682T	25.87	43.53	0.95	2.84	23.66	3.15
1250	ATACGTGCTAGTATT	WT	63.61	6.34	6.16	2.14	19.91	1.82
1251	ATACGTTCAGGATGA	T283C,C400G,C415T,G644T	29.87	40.89	5.03	0.48	22.37	1.36
1252	ATACTATCGAAGTC	A220T,T329C,C442A	84.78	2.76	1.65	2.01	6.79	2
1253	ATACTCTTGTTCTTT	A438G,G574A	63.45	15.34	6.69	0.7	11.58	2.24
1254	ATACTGGGTTATACT	C61T,A105G,C185A,T247A,T317C,G381C,G564A,C567T,A678C	NA	NA	NA	NA	NA	NA
1255	ATACTTAATACATCA	T111A,C466A	32.34	32.75	3.75	1.25	28.27	1.65
1256	ATACTTCAGTTTTTA	WT	63.4	5.69	5.34	2.09	21.49	1.98
1257	ATACTTCCGGCAGGC	G233T,C393T,C589T	33.03	37.05	3.9	1.07	20.52	4.42
1258	ATACTTGATTAGAGT	G97A,C143A,T206C,G471C	48.73	21.9	3.25	2.36	21.36	2.4
1259	ATACTTTCCAGAGGT	A252T,G311A	81.46	0.97	5.11	3.36	7.88	1.22
1260	ATAGAAGCTCTAAAT	A194G,T581A	61.63	6.75	6.31	1.96	20.98	2.36
1261	ATAGAGACGTAGAAT	A285G	49.26	22.42	5.51	0.73	20.22	1.85
1262	ATAGAGCTCGAGTAG	G72A,T136C,T586C	64.84	8.32	5.64	2.22	16.61	2.36
1263	ATAGATATTCAGTTA	C155T	65.2	5.16	5.62	2.38	20.09	1.55
1264	ATAGCAATTCCACTG	C144T,A188T,C454T,TG459T,A663G	23.45	55.93	1.29	0	18.81	0.52
1265	ATAGCACCGTTTCTT	C266A,T516A	2.03	0.6	0.15	14.34	58.71	24.17
1266	ATAGCATGACGGTGG	G210C,C612T	58.64	3.9	3.9	2.47	29.91	1.17
1267	ATAGCATGATTTCGG	T86C,A203T,A513G	56.88	8.52	6.55	3.8	20.84	3.4
1268	ATAGCCAATAATTAT	C34T,C62T,T116G,T137C,A199T,C314T,C376A,G381T,C404T,C527T,A541C	32.59	10.56	2.59	3.88	42.78	7.6
1269	ATAGCCTGGGGACT	G319A,A572T,C611T,T658C,C684A	74.11	6.54	3.3	2.65	10.85	2.56
1270	ATAGCCTTATGTTCT	WT	65.01	5.67	7.36	2.38	17.89	1.68
1271	ATAGCGTGCATTTGG	WT	63.84	6.86	6.75	2.59	18.01	1.95
1272	ATAGCTCAAAGTTTT	G348A,A408C,A513G,A594G,G644T	44.68	0.51	3.91	6.37	26.58	17.96
1273	ATAGCTTCAACATGA	A438G,T440G,G561C,C637T,G683A	57.35	14.24	4.44	2.1	19.22	2.64
1274	ATAGGCAGACATTCT	T186A	62.02	6.87	4.17	2.7	22.31	1.94
1275	ATAGGCGTGCTCGCT	A83T	65.16	6.35	5.65	2.34	18.45	2.04
1276	ATAGGGTGTAGATTA	A492T	65.16	5.72	6.4	2.15	18.13	2.44
1277	ATAGGTAACTGTATA	WT	63.66	5.27	6.9	1.95	20.26	1.95
1278	ATAGGTGCCAAGCTC	G259A,C278T,T300C	NA	NA	NA	NA	NA	NA
1279	ATAGGTGTTTATCCG	G49A,T108A,C142G,T249C,C369G,A641G	64.64	8.98	5.84	1.45	16.75	2.34
1280	ATAGTAAGATTATCG	A118T,GC433G	60	6.74	6.99	2.89	22.17	1.21
1281	ATAGTACAGTTTTAC	C93A,T446C,C503T	0.69	64.36	0	0	30.11	4.83
1282	ATAGTACGGTGAACG	C94T,G264T,T308A,T354A,C404T,G471A,T638A	69.26	1.67	3.39	5.05	19.23	1.39
1283	ATAGTACTCCAATAA	G379A,C397A,C642A	83.25	0.67	4.91	4.75	5.66	0.75
1284	ATAGTAGATATAAGT	T111C,T137C,G229A	50.81	12.2	5.23	1.74	28.15	1.87
1285	ATAGTCCCGGGTTCG	C144T,G210C,T302A,T329A,C463T,T491A,C552A	70.91	1.79	3.77	2.33	18.85	2.34
1286	ATAGTCGGTTAAAAC	C571A	64.94	7.09	5.94	1.92	18.48	1.63
1287	ATAGTCTATTAACAG	C55T,G81A,C114T,A253T,G417A,G449A,A494G	16.92	65.42	1.45	0.66	12.58	2.96
1288	ATAGTGCACACTTCA	G104A,A199G,T200C,T701C	65.49	7.56	3.78	2.02	20.4	0.75
1289	ATAGTGGGGATAGTT	A45T,C55A,A105C,T321A,A408T,T562A,T613A,A663G	44.59	9.59	4.67	1.72	34.57	4.85
1290	ATAGTGGTCTATTTA	WT	63.45	7.49	5.46	2.07	19.5	2.02
1291	ATAGTGGTTTTAGAA	C265T,T608C	61.67	4.69	7.62	1.66	22.15	2.21
1292	ATAGTTTGTTGGCAC	C142T,C286T,A523G	1.94	0.45	0	15.96	39.25	42.4
1293	ATATAAACCAGAGCA	T115A,A253T,G313A,A371T,C400A	45.4	19.89	4.94	1.38	26.67	1.71
1294	ATATAAAGAATAACG	C591T,A681G	58.63	2.82	3.7	5.1	29.23	0.53
1295	ATATAACGGGCTTCC	A383G	70.24	6.95	5.26	1.9	14.62	1.02
1296	ATATAACTTGGCGAT	A44T,T108G,C139A,T308C	71.82	1.13	8.3	3.64	14.22	0.89
1297	ATATAATTACGTTGT	G271A	78.24	2.46	1.76	3.86	11.58	2.11
1298	ATATACACGGCATGT	C34T,T70G,A236T,A252G,T289C,C345T,G379T,A477T,G544A,C615T,G626A,T628C,A663T	20.65	14.13	0	2.18	56.52	6.52
1299	ATATACGCATTTATG	T29C,G243T,G484A,C497T	60.31	2.12	3	6.17	25.22	3.19
1300	ATATACGTAGCTCGA	WT	61.53	6.61	4.93	2.47	21.7	2.77
1301	ATATACTCACTTATC	WT	57.8	6.48	7.13	3.21	23.61	1.76
1302	ATATATGATCGAAAG	WT	58.21	8.64	7.52	1.39	21.45	2.79
1303	ATATATGATTCATCT	TG469T,A474T,T516C	49.64	8.21	4.4	3.23	29.71	4.81
1304	ATATATGGTTAAAAT	T621C	66.82	5.12	5.9	1.88	17.83	2.44
1305	ATATATTACGTGATA	G427C,C458T,A535G	63.48	7.26	5.54	2.45	19.84	1.44
1306	ATATATTGTGCAATG	WT	66.5	5.8	5.35	1.85	18.39	2.1
1307	ATATATTTTAACCTT	G76A,C478T	63.17	6.03	5.77	2.36	20.84	1.84
1308	ATATCAATCTACTTT	WT	62.78	8.39	5.29	3.1	17.88	2.56
1309	ATATCACGATTATTG	A156G	62.29	8.29	5.95	2.03	18.56	2.88
1310	ATATCATCTGCCCAT	A641G,A653G	20.5	0.91	0.45	13.89	63.78	0.46
1311	ATATCATTTACTCTT	T491A	62.81	4.57	5.95	1.83	21.8	3.04
1312	ATATCTCACCTAGAA	A78T,G349A,GC402G,A641G,T697C	77.96	0.49	4.4	4.49	10.51	2.15
1313	ATATCTCTGGTCCTT	A59G,C110T,G127T,A246G,A338G,C339T,T465A,C630T,T634C	3.63	76.06	0.81	0.4	15.75	3.35
1314	ATATCTGTGCGCTAT	G305A,C521T,A542G,G693A	70.79	1.54	3.6	6.9	14.92	2.25
1315	ATATCTTCGTCCTTA	A78T,C92T,A236T,T270C,C591T	72.6	2.79	3.51	2.64	17.65	0.8
1316	ATATCTTTTCGATGA	T216C,T293C,A416G	71.88	6.87	2.5	2.5	15	1.25
1317	ATATGAGCGTATTAA	T70C,A160C,A232T,G330A	62.01	3.8	6.42	1.89	24.05	1.83
1318	ATATGCCCATTTCTT	G30A,G99A,T186A,A213G,T390C,T413C,T429A,A689T	68.71	2.79	1.78	2.79	23.41	0.5
1319	ATATGCGTTTGATAT	G470T,T532C,C591G	55.64	9.46	5.75	1.93	18.31	8.91
1320	ATATGCTCATTTTTC	T39A,G313A,G568T	41.61	21.57	5.66	1.09	26.58	3.49
1321	ATATGGAAATCTATT	A166G,T303C,G359A,G644T,T697A	74.26	2.42	6.92	3.21	11.29	1.9
1322	ATATGGATCCTAATT	C464A,C618T	61.52	8.57	4.78	2.24	19.67	3.22
1323	ATATGGGTATGAAGA	C158A,G313A,G635A	43.08	20.3	3.13	1.62	28.72	3.15
1324	ATATGTGGCAACGTT	C154A,G391A,T509C,C615G,G617A	44.05	14.03	4.44	2.31	30.11	5.06
1325	ATATGTTCAAATTAT	A371T,G496C,G614A	50.65	10.29	5.28	3.17	27.44	3.17
1326	ATATGTTCTTTATGT	AC59A,A203G,T650A	51.28	6.53	7.29	1.79	32.36	0.76
1327	ATATTAAATTGTTAG	C92A,C455T,A506T,CT603C,C687G	2.11	69.97	0	5.11	18.62	4.2
1328	ATATTAAGCGCGGCC	C312A,A535T,T634A	60.05	7.87	3.73	2.73	23.81	1.81
1329	ATATTAGGTGTGTTT	AC59A,C567T	54.39	6.39	5.19	3.27	29.62	1.14
1330	ATATTCCTGAATACC	G471T	44.16	21.05	4.12	3.66	26.09	0.92
1331	ATATTCGTGTAATAT	T401A,GC402G,G414A,T692G,T704G	14.84	1.42	0	14.63	66.67	2.44
1332	ATATTCTCATGTCTC	T509C	60.58	6.19	4.84	3.28	21.43	3.69
1333	ATATTCTGCACTTGA	T162C,G348T,G537A	46.54	0.65	2.37	9.47	37.15	3.82
1334	ATATTGTAATTATTA	G79A,G89A,G163A,G234T,T302C,C435A,G441A,T655A	75.4	0.91	3.19	4.38	14.95	1.17
1335	ATATTTCCTGCGACA	A232T,G331A,T354A,C511T,C652T	87.31	0.41	3.65	2.77	4.63	1.24
1336	ATATTTCGAAGTACG	CT114C,T140A,T351C,T553C,T621A	72.78	2.95	5.11	2.24	14.69	2.25
1337	ATATTTGAAAATAGA	G106C,C412T,A653G,T666A	55.84	15.72	4.65	1.44	19.89	2.46
1338	ATATTTGGTAGTCCG	G76A,G123T,G318A	64.67	10.51	3.96	1.64	16.08	3.13
1339	ATATTTTTTCACAAG	A78G,T341C	74.33	2.37	5.34	2.28	13.99	1.68
1340	ATCAAAAACTGTACC	T38C,C55A,C320T,C406T	33.86	18.1	6.72	1.21	36.39	3.72
1341	ATCAAAATTTGGACC	C197T,C248T,C344T,T351C,T604A	63.64	4.95	6.89	2.39	19.71	2.42
1342	ATCAAAGCTCTTACC	WT	61.64	6.78	5.44	3.34	21.15	1.64
1343	ATCAAAGGACTTACA	A301G,G559T	60.37	3.07	4.6	2.55	24.81	4.59
1344	ATCAACAGTGAGTCT	T565C,C665A	67.2	7.4	5.29	1.76	15.8	2.54
1345	ATCAACGCTGTCGCC	A663T	65.33	5.78	4.62	2.09	20.41	1.78
1346	ATCAACTAAATTTAA	A232T,G636A,T655C,T669A	62.96	8.47	8.18	1.73	15.64	3.02
1347	ATCAAGACACTCTGT	A181T	55.56	4.45	4.65	2.02	32.12	1.2
1348	ATCAAGCCATTAACG	C33T,T498A,T504C,G575A	5.66	1.3	0.84	10.26	40.86	41.09
1349	ATCAATAAGCGACGT	A383G,A443G,C567T,G686C	NA	NA	NA	NA	NA	NA
1350	ATCAATCCTCATCCG	WT	66.35	7.36	5.69	2.29	16.38	1.94
1351	ATCAATCGCGTACAT	T130C	71.92	7.2	4.13	2.14	12.16	2.44
1352	ATCAATTGGGTTGGA	WT	65.64	7.2	6.38	2.01	17	1.77
1353	ATCAATTTTAATTGG	T440C,T655C,TG669T	72	8.47	4.47	3.29	10.35	1.42
1354	ATCACAACGCCTTCG	T84A,CG376C,C411T,C598G	68.41	0.68	4.12	3.89	21.17	1.72
1355	ATCACAGATATCCAT	C159T,C344T,C502T,C577T,G599A,G683C	62.11	4.55	5.11	2.27	24.43	1.52
1356	ATCACAGTACTTTGC	C295G,A385G,A609T,T634A	0.77	86.74	0.21	0.07	11.3	0.91
1357	ATCACATAACAGCTA	WT	65.31	5.9	5.23	2.89	18.35	2.32
1358	ATCACATTCTATGCT	C55T,A194T,A365T,T419A,T509A	48.82	7.85	5.4	3.21	31.34	3.36
1359	ATCACCTGTGCCCTC	T116C,T130C,T293C,C314A,T429A,C552T,C567T,C612G	34.39	2.71	3.16	13.12	42.54	4.07
1360	ATCACTCATCGATTG	WT	65.33	6.8	5.76	1.86	18.04	2.2
1361	ATCACTCGCAGTTTA	WT	58.77	7.9	6.15	2.25	22.42	2.5
1362	ATCACTCTTTATTAC	A181G,C436T,A494T,C530G	30.28	1.84	1.84	17.43	42.2	6.42
1363	ATCACTTATGTAAGG	G51A,A202G,G230A,G313A	28.35	28.06	5.12	1.32	34.35	2.81
1364	ATCAGAAACTTACGA	G271T,G348T	74.42	1.01	6.56	2.68	14.31	1.02
1365	ATCAGACATAATACA	G128A	66.38	6.21	5.22	2	18.09	2.1
1366	ATCAGCCTTTCATTA	A118G,T174A,C288T,T504A,T650C	10.36	0.32	0.65	26.54	58.26	3.87
1367	ATCAGCTCCAATAGA	C262A,TG329T	77.1	1.68	6.47	3	10.55	1.2
1368	ATCAGGCTTTATAGT	T186C	60.97	7.49	4.28	1.07	23.53	2.66
1369	ATCAGGTTATCCTTT	G32T,G163A	63.22	6.02	5.83	2.14	20.95	1.85
1370	ATCAGTAATTACAAA	G32A,T130C,A213G,T240C,A268G,T432A,T446A,C515T,G566T,T666C	0.21	91.98	0.04	0.13	6.62	1.02
1371	ATCAGTCGTTGATCC	G260A,A263G,A299T,T386C,A506T	2.99	27.72	0.11	21.73	36.29	11.15
1372	ATCAGTCTTCACCCG	C197T,G529C	69.63	7.45	4.71	2.15	14.39	1.66
1373	ATCAGTTCTGCGTTA	T389A,G448T,A560G,G564A,TG669T,G674T	32.32	0.86	1.55	2.31	9.96	53
1374	ATCATACCCATCACG	WT	68.75	6.27	5.74	2.39	14.63	2.22
1375	ATCATATTTAAACAC	TG308T,T565A,A578T	74.4	1.15	5.83	4.26	13.48	0.89
1376	ATCATCATATACCTG	C151T,T179A,A232G,C415T,T528A	28.08	20.89	2.4	2.4	44.86	1.36
1377	ATCATGTATATTGTC	A147G,A199G,T335C,G479A,G614A,T621A	51.59	10.79	3.62	3.08	29.11	1.81
1378	ATCATGTCTCAACGG	T315C,A425C,C522T,G629C,T666A	74.49	3.01	5.81	2.29	13.59	0.81
1379	ATCATGTTGTAGTGA	A256T,G402A,T509A,G510T,C512A,C571A,G639C,A653T,T661A,A694T	69.46	1.42	1.29	5.93	20.23	1.68
1380	ATCATTAAAATCCCA	T394C	75.38	1.55	6.29	1.62	13.8	1.35
1381	ATCATTAATTACATT	A44G,T255A	66.38	4.59	5.07	3.39	19.13	1.44
1382	ATCATTACAACCGAT	T153A,T162A,G235A,C339A,G657A	14.18	62.9	2.81	0.52	16.97	2.61
1383	ATCATTATTGATCGT	A44G,C197A,G284A,C367T	58.76	9.82	6.38	2.02	20.56	2.47
1384	ATCCAGAAAAATGAT	G192A	64.87	6.33	5.51	2.02	19.71	1.56
1385	ATCCAGCTAGGCTAC	T218A,T439C	59.57	10.88	4.83	3.1	20.23	1.4
1386	ATCCATATAGAAGTT	T53C,TC137T,T173A	62.51	8.31	5.69	1.98	19.61	1.89
1387	ATCCATCGTGCGCTA	T325A,T465C	48.17	22.36	5	1.39	21.85	1.23
1388	ATCCCAGACTTCATG	G189T,T361C,A558T,G639A,A678T	64.43	10.31	4.64	1.8	16.24	2.58
1389	ATCCCCATGAATTCT	A232T,G370T	35.63	35.63	5.06	1.12	19.89	2.67
1390	ATCCCCTAAATGATC	C397A,A447T	8.93	62.49	0.7	0.5	14.55	12.83
1391	ATCCCTCGATCCTAG	T130A,A182G,A492T	NA	NA	NA	NA	NA	NA
1392	ATCCGAGCCGTTGAT	G569A	68.53	8.19	5.32	1.5	14.15	2.31
1393	ATCCGAGGATTTCAG	G395C,A443T,C511T	10.74	83.07	0.69	0.08	4.38	1.04
1394	ATCCGGAAAAATTTA	T274C,T347C,T446C,C577T,TG655T	0.68	83.7	0.23	0	15.15	0.23
1395	ATCCGGTGAGATATC	C675T,T697C	65.12	7.8	4.48	2.34	18.13	2.13
1396	ATCCGTGTATACTGC	A667G,T669A,A694G	21.64	1.35	0.57	13.22	62.45	0.76
1397	ATCCGTGTTGCATTT	C453T,G488A,C514T,A547C,T601A,G647T	67.19	8.6	5.17	1.71	16.33	1
1398	ATCCTAATAGGATCA	G109T,A118T,A152T,T153A,A383G,A425G,G470A,A523G,A541G	2.02	0.37	0.18	7.36	75.92	14.15
1399	ATCCTATAAATATTG	A513T,TG553T	69.9	13.06	4.57	1.5	9.05	1.93
1400	ATCCTGAATGGGTAG	C376A,A447G	2	81.83	0.57	0.09	13.23	2.28
1401	ATCCTTCATCAAAAT	T29C,T179C,A220T,A252G,C600A	46.55	21.33	4.59	1.83	23.62	2.07
1402	ATCCTTTGGAAATCG	WT	68.34	6.55	5.11	2.05	16.26	1.69
1403	ATCCTTTGTGGCGTA	A147G,G626A	64.35	7.13	5.72	2.29	18.4	2.11
1404	ATCGAACATTTACGC	A47T,T53A,A118T,C193T,G284T,G651C	74.31	3.44	3.58	2.78	14.04	1.86
1405	ATCGACAGGATTTTA	A296T,C312T,C405A,G433T,T446A,A451G,T516C,T528C,G555T	0.65	72.45	0	0.24	11.22	15.44
1406	ATCGACTTTTTTTTA	A558G	65.02	9.12	3.98	2.99	16.91	1.98
1407	ATCGATACCGTAACA	G326A,T631A	61.09	10.22	5.89	2.35	17.68	2.77
1408	ATCGATATCGGTACA	T333A	78.23	1.87	5.28	2.5	10.78	1.34
1409	ATCGATCTTTGACTC	T274A,C423T,T465A,T557C,T696C	52.97	17.02	1.49	1.7	20.85	5.96
1410	ATCGCACGTCCTATG	WT	65.15	8.22	5.46	2.16	16.95	2.06
1411	ATCGCACTAATTACA	C107T,G229T,C415T,C454A,C552A,A580G	7.71	26.16	0.61	1.21	63.68	0.61
1412	ATCGCACTGATCATT	G80A,A152G,A177G,T247C,A365T,A451T	51.02	18.12	6.04	1.34	20.13	3.35
1413	ATCGCAGCCTCCAAC	T293C,C400T,G569A,T620A,A685G	69.43	5.21	5.51	2.54	14.77	2.54
1414	ATCGCATCTTGCCTT	WT	64.11	8.12	5.65	2.05	18.37	1.71
1415	ATCGCCTGTCTTCGA	A323T,T413C	59.06	13.21	3.99	2.42	18.64	2.68
1416	ATCGCGCGACATCGA	AG96A,T267C,G313C,A358G,C468A,T621G,A689T	1.8	85.7	0.36	0.15	9.12	2.87
1417	ATCGCTGCATGCTTT	A65G,G75A,G163A,A232T,T249C,G275A,G402A	63.49	6.84	8.23	2.05	16.53	2.86
1418	ATCGGCAGATAGTAG	G113A,T130C,A166G,T432C,A451T,G531A	75.49	4.07	2.71	3.38	12.55	1.81
1419	ATCGGCTGGAATTTA	G95A,A105T,C114T,T115A,T126A,A177T,G250A,C320T,T329A,T347C,A425G,C434T,C453T,C467G,G481T,T498A,G537C,C612A	4.14	46.21	0	2.07	43.45	4.14
1420	ATCGGGCATTCCTGG	A65G,T86C,A166T,G222T,A252G,G272A,A323G,T631A	63.28	8.18	6.64	3.55	16.97	1.37
1421	ATCGGGTCTTACAAT	C121T,C164T,C336T,T613C	21.69	42.16	3.7	0.31	27.38	4.76
1422	ATCGGGTTTTGAATC	G316A	53.17	14.33	5.56	2.74	21.3	2.91
1423	ATCGGTAGTGCGGGT	AG65A,G172A,G362A,C424T,G569A	27.23	43.92	3.17	1.69	19.43	4.56
1424	ATCGGTGCTGTATTT	T31C,C85A,C148T,A251T,C375T,G457A,T643C	59.55	13.31	5.53	1.82	16.96	2.83
1425	ATCGTAGGTGCTGAC	G350A,C364T,G593A	78.87	0.78	4.15	3.13	10.96	2.11
1426	ATCGTCAACTCACAG	T303A,G488A	71.28	2.38	4	3.58	14.35	4.41
1427	ATCGTCTAGGTTTAG	G79A,A256G,A263G	73.07	4.1	2.74	3.32	14.07	2.71
1428	ATCGTCTGGTCCATT	G134A,G677T	67.33	4.82	3.29	3.38	19.26	1.92
1429	ATCGTGAAGATTACA	WT	64.78	6.84	4.76	2.28	19.45	1.89
1430	ATCGTGGGGTCCCGA	C77T,G635A	67.99	4.86	4.1	2.62	18.82	1.62
1431	ATCGTGGGTCGAATT	C375T	58.63	13.18	4.93	1.69	19.14	2.44
1432	ATCGTGGTCATTTAC	A65T,C139A,A343T,G488T,G524T,T631C,G639A,C642A,A648T	0.64	0.2	0.04	4.56	9.15	85.41
1433	ATCGTGTGATAATGA	T283C,G690T	65.15	3.51	2.92	2.5	23.24	2.69
1434	ATCGTTAACTGCCGG	G366A,T553A,G575A	57.56	12.03	5.97	1.18	19.47	3.79
1435	ATCGTTACTAACTTG	C93T,C450T	69.9	3.37	7.61	2.93	14.46	1.73
1436	ATCGTTCCCAAGATT	A65G,A147T,A199G,A296G,C307T,C450A,G568T,C662T	0.26	65.1	0.26	0.39	31.12	2.86
1437	ATCGTTCGACGGGTC	C148T	68.7	7.05	4.96	1.67	15.94	1.68
1438	ATCGTTGATGACTTT	G30A,C55A,C397A,A494T	69.34	2.08	5.47	2.39	18.79	1.93
1439	ATCGTTGGAAGAGAC	T48A,G52A,T153A,G595T	58.46	11.54	5.91	1.54	20.16	2.38
1440	ATCGTTTAACAGAGA	C93A,T162A,G230A,G239C,A296T,G353A,G479T	0.96	69.81	0.11	0.21	26.24	2.68
1441	ATCGTTTCTCTTAAT	G215A,C286T,G306C,T335A,A343G,T373C,A609G,T643A,T704C	49.33	4.7	3.69	2.35	38.59	1.34
1442	ATCTAAAAATAACTA	C36T,A383C,C478T,T526C,TG655T	55.63	4.53	3.44	4.35	26.45	5.61
1443	ATCTAATGAGTCGGA	T140A,T491C,C615T,G693A	55.37	4.62	6.24	5.36	25.82	2.6
1444	ATCTACATCTATTAG	T31C,G227A	58.16	8.58	6.73	1.93	22.36	2.24
1445	ATCTACTGATAGATC	G67T,G113T,C364T,T465C,T620A	32.39	44.96	2.34	1.72	16.96	1.63
1446	ATCTCACTGGGAGTG	WT	66.1	7.43	4.55	2.16	17.12	2.65
1447	ATCTCCTTAATTCTA	C92T,C406T,T643C	65.62	5.42	5.96	1.7	18.14	3.15
1448	ATCTCCTTAGGGTTG	G100A,A209G,A338T,G639A	65.73	6.17	6.17	1.84	17.1	3
1449	ATCTCCTTTATTATG	G433A	63.64	6.05	5.53	2.37	19.24	3.17
1450	ATCTCGAAGGAGCAA	T117C,G258A	58.46	12.45	6.4	1.52	18.96	2.2
1451	ATCTCTATCTAGGAGT	G35A,T38C,T270C,T347C,C602T	72.87	2.47	4.95	2.65	15.13	1.93
1452	ATCTGAACAACTTGG	T117C,A282C,C411T	35.61	14.55	5.11	1.63	36.58	6.53
1453	ATCTGAGCTTCATTA	T74A,G97A,G372A,G414A,T565A	51.51	16.93	4.81	1.6	20.94	4.21
1454	ATCTGATAACCATAA	A451T,C502A,G540A	68.49	2.24	5.42	3.54	17.43	2.88
1455	ATCTGATAGCGTACA	A78G,G353C,T440A,A594G,T632A	46.75	0.63	2.84	9	40.28	0.48
1456	ATCTGATTTCTCATA	WT	64.29	7.36	4.85	2.04	19.76	1.7
1457	ATCTGGCCTGCCTAT	G461A,C551T,G569A,G573T,A663G	44.4	31.62	3.09	2.02	11.39	7.47
1458	ATCTGGTTCGTTTGT	A203T	70.17	5.69	4.98	1.61	15.99	1.56
1459	ATCTGTATTTTTAAA	T557C	61.72	7.96	6.25	3.28	17.5	3.28
1460	ATCTGTTCCAATCCC	WT	68.67	6.53	6.01	1.44	14.75	2.6
1461	ATCTGTTTTAAATTA	A45T	59.59	6.54	7.71	2.34	21.96	1.85
1462	ATCTTACACATAGTA	A252G,T335C,G422A,T601C,A653T	53.56	6.29	4.87	3.44	20.49	11.35
1463	ATCTTACCCTCCACG	WT	65.51	6.42	6.2	3.38	16.35	2.14
1464	ATCTTACTTACTGTA	G318A,T516G,C571T	12.33	3.22	0.8	13.94	66.76	2.95
1465	ATCTTATCAATAAGC	A59T,T329C,A641T	72.51	1.82	5.6	3.07	15.59	1.4
1466	ATCTTATCTTCCATA	G123A,A188G,A191G,T419A	66.92	4.51	4.51	1.5	21.8	0.76
1467	ATCTTATTTGATGGT	C55T,A101G,C125A,A152G,T179A,A232T,A323T,C364T,T601A,G614A	34.78	15.76	3.26	3.26	40.76	2.17
1468	ATCTTCCTGTGTCCT	WT	70.03	7.25	4.32	2.17	14.64	1.59
1469	ATCTTGTTAATTGCG	C281T,G305A,A438G,T608A	79.64	1.17	5.53	1.82	10.27	1.58
1470	ATCTTTATTTGACTG	G72T,G305T	81.12	1.28	2.6	4.19	9.44	1.38
1471	ATCTTTCTTAACTCC	T440A,T666A	58.25	10.46	5.19	2.93	21.5	1.67
1472	ATCTTTGCCACCTCA	G633T	NA	NA	NA	NA	NA	NA
1473	ATGAAAATCCCACAA	C198A,A263T,G322T,T394C,T429C,A513G,C598T,T632C	65.67	3.85	5.85	2.68	20.04	1.91
1474	ATGAAAATTACTAAC	G244A,G388A,G544C,C603T,C615A	55.59	2.36	3.31	3.15	31.97	3.63
1475	ATGAAGCAGGAGGCA	G51A,A213G,T280A,T321A,T420C	13.93	37.07	5.75	0.57	37.76	4.92
1476	ATGAATAGACGCAGG	A220T,G234A,G276C,T329A,C468T,C642T	56.32	18.14	4.92	2.13	15.55	2.95
1477	ATGAATGATGGGGTG	T50C,AC59A	62.28	7.2	5.64	2.97	18.15	3.77
1478	ATGACATGCCAGAAT	A299G,T386A	10.45	69.04	1.69	0.44	16.18	2.2
1479	ATGACATTAGTCTTA	A120G,A166G,G702A	62.6	7.26	5.98	2.07	20.13	1.98
1480	ATGACGCGGATTACC	C63T,G73A,C418T,G517A	58.49	18.18	4.45	1.27	15.89	1.72
1481	ATGACTTGAATGTGA	T122C,C369T,A682T	52.29	16.35	3.85	2.13	21.73	3.64
1482	ATGAGGGATATGCCC	A282T,A456C	49.99	10.08	6.1	3.01	27.61	3.21
1483	ATGAGGTAGAAGTA	C142G,C279A,A365G,G366T,T432C,G525A	62.76	3.61	4.03	3.7	18.93	6.97
1484	ATGAGGTGGGGGGGG	C265A,C522T,G529C,G559T,G644A	77.87	4.07	4.42	1.4	6.87	5.37
1485	ATGAGTATGTGTAAT	C139A,C143T,A477T,G617A,T650C	49.18	4.72	2.49	3.87	37.85	1.9
1486	ATGAGTCTGTCCGTG	C552A,G555T,G636A,CG675C,A681G,C687G	61.24	9.23	2.2	2.59	9.5	15.25
1487	ATGATAATGCTTCCA	T622C	72.52	6.31	3.81	1.78	12.81	2.77
1488	ATGATACCATCGTAT	T116C,G294A,A462G,A685G	67.32	7.13	4.17	2.91	17.28	1.19
1489	ATGATAGAGTCCTTC	A494G	69.91	4.85	6.47	2.27	13.92	2.58
1490	ATGATATATTTGTAT	T50C	61.55	6.75	5.69	2.74	21.37	1.9
1491	ATGATATCACACTTA	T270A	68.35	5.49	4.14	2.98	17.44	1.6
1492	ATGATATGAATAGAC	WT	63.92	6.33	5.34	2.23	20.2	1.98
1493	ATGATATTAAGGTTT	G488A	59.5	6.41	5.62	2.89	19	6.59
1494	ATGATCATCAAAGA	A147C	67.42	9.34	4.91	2.41	13.58	2.33
1495	ATGATCCTCCCGGCG	G561A	67.66	6.2	4.9	2.38	16.01	2.84
1496	ATGATGACGTTTTTC	A203G,T293A,A456G,T666C,A685G	2.88	26.12	2.25	0.65	50.48	17.63
1497	ATGATGGTGAATAGT	C62A,C149T,G189C,T291A,T374C,GC517G,G531C,A541T,T688C	3.86	23.17	0	1.16	69.9	1.91
1498	ATGATGTTGGCTGAG	A238G,A456T,A681T	68.99	4.99	4.28	3.63	16.37	1.75
1499	ATGATTATATTCCGA	C266T	74.21	1.89	5.03	1.26	16.35	1.26
1500	ATGATTGGGATGGAT	T50C,T126C,G189A,T390G,G574A,T697C	66.55	9.87	5.53	1.72	12.42	3.91
1501	ATGATTTGCAATGTG	G99T	66.34	7.07	4.5	1.93	17.68	2.48
1502	ATGCAAATAGGGAGT	G66T,G310T,A365G,A408T,T562C,G657A	81.2	0.99	4.8	2.75	9.25	1.01
1503	ATGCAACATAATCAA	CG376C,G481A	53.72	6.91	4.16	2.75	22.87	9.57
1504	ATGCAGCCATCCGTT	T53C,C92A,T153A,C397T,C482G	64.51	4.32	6.48	2.16	19.44	3.09
1505	ATGCAGTGGTTGGTT	WT	66.89	5.32	5.22	1.77	18.43	2.36
1506	ATGCATCTTCAGGAT	WT	69.19	6.47	4.61	2.35	15.7	1.67
1507	ATGCCCTCATTATTC	G470A,A572G,C627T	43.52	11.97	2.49	3.37	36.16	2.48
1508	ATGCCCTTTTGTAAT	T117A,C169T,C288A,G496A,T545C	54.55	11.21	4.6	1.62	25.53	2.48
1509	ATGCCGATAGAAAAC	A83T,T508A	65.65	6.72	6.97	2.2	16.26	2.2
1510	ATGCCGGAATAGTGA	A156G,G272A,TG303T	78.66	0.3	6.04	6.22	7.5	1.28
1511	ATGCCTCAACCTCAA	T31A,A82G,C281T,T293C,G496T	59.91	5.33	5.84	4.31	20.81	3.8
1512	ATGCGACGCCCATTA	G56A,T137C,C281T,G449A	13.51	63.17	1.01	0	17.91	4.39
1513	ATGCGAGAATTATAA	A246T,G326T,T440A,T528C	52.58	13.77	3.54	3.76	24.38	1.97
1514	ATGCGAGAGTTAAAC	C155T,C369T	48.11	16.59	5.87	1.99	24.77	2.67
1515	ATGCGAGCAATGTAG	C675T	63.65	7.37	5.68	1.61	19.91	1.77
1516	ATGCGATCAGCGGGG	A263T	67.78	5.78	5.5	1.88	17.49	1.58
1517	ATGCGATGTGATAAG	G80A,A83G,C514T	73.91	8.2	4.95	1.36	9.85	1.72
1518	ATGCGATTCTAAGTG	GC617G,T628A	67.46	9.29	6.3	1.05	12.89	3.01
1519	ATGCGTACCTAGAAG	G109C,CT412C,C591G	60	6.44	6.1	2.15	21.36	3.96
1520	ATGCGTTATGTGTAT	T31C	60.19	6.84	5.37	2.04	24.02	1.53
1521	ATGCGTTCCATGATA	A199G,C520A	59.52	5.21	2.79	4.13	24.12	4.24
1522	ATGCTAACGTGGGGG	C406T,A541G,C589T	65.39	4.87	6.93	1.79	18.16	2.86
1523	ATGCTATACTATCCA	T557A,G575T	56.79	16.34	9.15	1.09	13.22	3.41
1524	ATGCTCTTTCGGCCT	G75A,G499A,T655C,G674C	61.11	6.38	3.39	2.47	24.8	1.86
1525	ATGCTGTCTCTCTCA	C287G,T389C,A474G	66.68	3.06	6.61	2.3	19.01	2.35
1526	ATGCTTCAAGTACCC	WT	65.54	6.89	5.9	1.94	17.84	1.88
1527	ATGCTTCAATTGTAA	A547T,C577A,A578G,G635T	59.83	3.12	5.1	4.86	25.46	1.63
1528	ATGCTTCTTACCGAC	T74C,C133A,G391A,T401C	59.28	18.56	3.88	1.38	13.3	3.59
1529	ATGCTTGAGGGATTT	C489T,A549G	70.78	8.65	4.52	1.65	12.96	1.44
1530	ATGCTTTATGATACA	T29A,T126A,C367T,T465C,C649T,A681G	47.61	14.99	2.97	2.64	30.81	0.97
1531	ATGCTTTCCTCTTTA	G98A,C197A,C292T,C407T,T605A,T631A	70.67	2.49	2.93	5.49	16.5	1.91
1532	ATGGAAAAGAACCTG	A542T	61.85	5.37	4.23	2.23	18.44	7.88
1533	ATGGAAGATCCTAAC	G227A,G441C,C654T,T666A	56.37	13	6.73	1.95	20.14	1.81
1534	ATGGATAAAGCGCGT	WT	63.7	6.51	5.57	2.54	19.23	2.45
1535	ATGGATCATATTCAC	C94T,T432C,A523G	0.99	0.33	0.05	19.93	32.26	46.44
1536	ATGGATGTGTCTTGT	A541G,A663T	68.41	5.98	5.55	1.59	16.59	1.89
1537	ATGGATTCAGCTCAC	G350A	82.23	0.84	4.47	3.92	7.69	0.84
1538	ATGGATTTGTTTGAT	C530T,GC569G,C630G,T672C	71.03	5.26	2.54	3.94	13.71	3.52
1539	ATGGCAAAACACACT	C339T,T440C,C515A	19.94	49.46	3.12	1.18	22.71	3.6
1540	ATGGCACGAACTGGG	G564A	64.68	9.93	6.29	1.75	13.63	3.71
1541	ATGGCTAACTACTTA	T86A	50.03	7.36	7.76	2.77	30	2.07
1542	ATGGCTTATGTTCCG	WT	66.82	6.68	6.18	2.27	14.75	3.3
1543	ATGGGAAGGCATGCT	A356T	59.67	10.99	7	1.85	17.64	2.85
1544	ATGGGATTCAAAAAA	T131A,A182T,T392C,G444T,TG459T,C482T,G639A,A689G	0.98	91.81	0	0	5.57	1.64
1545	ATGGGGAGAGAGGAG	T111A,C400A,A560T	74.91	5.06	3.62	2.53	11.56	2.32
1546	ATGGGGCCTTTTTAA	CA64C,T116C,A214G	61.17	3.88	5.83	1.94	23.3	3.88
1547	ATGGGGGTTACAAAT	C158T,A513T	69.59	8.03	5.95	2.03	13.26	1.14
1548	ATGGGGTAAGATAAG	G43T,A296T,T302C,A451G,A477T,A523G,G583A,G664T	0.95	0.38	0	0	54.96	43.7
1549	ATGGGGTTAAATAAG	A147G,G352T	73.34	2.81	5.52	2.04	14.7	1.59
1550	ATGGGTCTGAAAACC	C185T	NA	NA	NA	NA	NA	NA
1551	ATGGGTCTTTGTTTA	A26T,G79T,T86A,G104T,A105G,A181G,TG270T,T321A,A358G,T528C,A549T,G599A	3.86	70.02	0.3	0.3	20.77	4.75
1552	ATGGGTTTCTGGTTA	G244A,C424A	50.87	13.51	3.97	0.95	24.33	6.37
1553	ATGGTAACAGTCCAC	T655C	72.39	8.74	3.19	1.85	11.21	2.61
1554	ATGGTACTAATAACT	WT	61.44	6.86	5.23	2.55	21.78	2.14
1555	ATGGTCACCTACATC	T170C,T601C	60.35	6.17	3.93	3.46	24.7	1.39
1556	ATGGTCACTAGACTT	G56A,A69G,C197T,T241C,G359A,A506T,C519T	2.9	11.84	0	6.28	71.49	7.49
1557	ATGGTGGGCGGCGGG	A167G,G239T,G245A,G306T,A323T,C403A	75.37	1.66	5.5	3.03	13.46	0.98
1558	ATGGTGGGTCTCAAT	G76A,G183T,T401A,GC517G,G617A	36.74	0.6	5.43	6.03	45.18	6.02
1559	ATGGTGTGAAATAAT	C273G,C600A,T666C	61.99	6.48	4.32	1.9	23.92	1.39
1560	ATGGTGTTTGTGCTG	G79A,A252C	66.89	5.12	6.83	2.05	16.38	2.73
1561	ATGTACTCTTCGACT	A167T,G387T,A408G,C619A	64.38	6.38	7.22	2.04	16.63	3.35
1562	ATGTAGAAAATTTTA	T53C,A214T,T347A,G380T,T508A,T610A,T661A	67.71	0.72	3.86	3.62	21.68	2.41
1563	ATGTAGATAATCGTA	T70C,T115A,T137A,G531A,T658C	69.26	4	3.38	3.43	18.03	1.89
1564	ATGTAGGGGAGCACG	WT	66.81	5.86	5.1	2.38	17.66	2.2
1565	ATGTAGTTTTCCCTC	G190T,C261T,T270C,T315C,G340A,T420C,T459A,T498C,G500T	58.4	4.62	3.78	1.05	31.52	0.63
1566	ATGTATCATCTGCCT	T335A,C375G,A590G	50.33	14.88	5.31	1.33	26.03	2.13
1567	ATGTATGGAACTCAG	WT	62.69	5.63	5.17	1.95	23.54	1.02
1568	ATGTATGTCTGCACA	G378T,G470T,T601C	52.08	2.09	4.18	3.94	29.58	8.12
1569	ATGTCAATGTCATAA	A462G,T504C,C615A,C627T	2.36	0.89	0.29	20.65	73.75	2.06
1570	ATGTCATTAGTATTC	G79T,A383G,A443G,A685T	6.07	82.06	0.47	0.31	10.53	0.56
1571	ATGTCGTGAATCAGC	G43T,G161A,G331T,A338G,T446A,C467A,C552A,C615T,C627T,G664A	2.75	50.46	0	0.46	44.49	1.83
1572	ATGTCTACGATGCGA	G421A,G444T,G575A,T628A,G702A	0.42	88.18	0	0	9.08	2.32
1573	ATGTCTCACGTTAAT	G30A,G264A,G331C	80.04	0.58	5.32	4.27	8.58	1.21
1574	ATGTCTCGCCCTAGA	C360A,A513C	56.68	6.49	5.02	2.27	22.19	7.35
1575	ATGTCTTGTCAGTAA	A171T	65	6.85	5.87	2.27	17.8	2.2
1576	ATGTGAACCATCCGA	A214T,G472A,C552A,G566A,T696A	43.09	2.58	0.23	3.28	46.61	4.21
1577	ATGTGAGTTTTTAGT	A451T	66.22	4.7	5.63	3.02	18.25	2.19
1578	ATGTGGGGCTGAATT	A282G,A383G	8.88	40.77	4.1	0	43.96	2.28
1579	ATGTGTAAGGCATAT	A44C,T126C,G221T,T303A,G378A,A473T,A485G,G534C,A594T,T610A,A648G	54.03	0.67	3.73	8.89	30.89	1.79
1580	ATGTTACTCATATTC	A105G,C144T,A226AG,T274C,A323G,A428G,G524A,T701A	2.07	0.57	0.19	2.46	75.64	19.07
1581	ATGTTATCAAAGAAA	T392C,T509C,T550A,T666C	53.47	1.99	1.83	8.45	32.28	2
1582	ATGTTGACTCAATCG	G271T,T613A	72.93	1.58	6.2	2.48	15.11	1.7
1583	ATGTTGTCAGTGTAG	A156G,A323T,T586C	57.96	11.88	6.26	1.39	19.66	2.85
1584	ATGTTTATACTTGAA	T240C,T255A,A580G	66.64	2.54	2.66	5.02	22.48	0.66
1585	ATGTTTGTTGGTGGT	G80C,G217A,A263G,T327A,A485T,C640T,G656T	78.84	5.02	2.01	2.64	9.77	1.73
1586	ATGTTTTCTAAAATA	WT	67.44	5.33	5.33	1.71	17.49	2.71
1587	ATGTTTTGCAATCAG	A202G,A334G	70.54	6.24	4.8	2.94	13.44	2.04
1588	ATTAAAAATGACAAA	A358G,T459A,C476T,G636A	2.7	83.42	0.76	0.08	11.12	1.92
1589	ATTAAACTGTTTAAT	G449A,GC517G,CA571C	7.3	43.82	0.43	1.08	22.13	25.24
1590	ATTAAAGGCGGCCTG	T29C,T86C,T218C,G239A,T361C,T419A,T465A,G573T,T581C,T613C,T634C,G670A	48.62	12.85	5.57	2.57	26.55	3.84
1591	ATTAACCTACTACTT	G27A,G103A,A167T,A191G,A462G,T504C,T539A,G614C	NA	NA	NA	NA	NA	NA
1592	ATTAACTAATTTGAC	G569A,A578T	63.4	8.7	5.8	2.54	16.85	2.71
1593	ATTAACTAGAAGTTC	C164T,T327A	65.14	5.52	6.82	2.09	19.08	1.35
1594	ATTAACTTCTACTGA	T122G,G215C,G235A,G448A,G595A,G676C,A682G	61.59	1.5	12.47	1	21.19	2.25
1595	ATTAAGGAAACTCTA	A191G,G599A	61.29	4.04	5.97	1.45	26.29	0.96
1596	ATTAATGAAGAATCA	T136C,A220T,T321C,T335C,T543A,T697C	75.71	3.09	4.02	2.16	13.9	1.12
1597	ATTAATGCGCTCCAA	C144A,C292A	10.11	62.44	2.06	0.89	22.18	2.32
1598	ATTAATGGGTACACT	T42C,G103A,T249A,T389C	70.38	1.99	5.21	1.76	19.42	1.24
1599	ATTAATGTCTATAAG	WT	64	7.17	6.17	1.5	19.83	1.33
1600	ATTAATGTTGTTGGG	A26G,T90C,T122C,C164T,GC395G,A485G	64.9	8.23	6.54	1.45	16.46	2.42
1601	ATTAATTCACCTCGT	WT	65.45	6.86	5.56	1.29	19.28	1.56
1602	ATTAATTTTAAGTAT	A365T	48.55	13.13	4.49	3.11	28.16	2.58
1603	ATTACAATTGACAAA	A268G,T622A,G636A	63.06	3.67	11.09	1.8	17.13	3.25
1604	ATTACAGTTTTCCAA	T116A,T201A,G272A,T283C,C527A,T532C	79.76	0.68	5.1	5.41	6.96	2.09
1605	ATTACATCACTTTCT	A57G,G234A,CG376C,G381T,G431A,C511G	49.12	1.49	3.63	6.53	22.27	16.95
1606	ATTACATCCCGCAAG	A96T,G264T,G349T	71.13	2.51	6.29	2.27	16.54	1.26
1607	ATTACATGTTATGCA	C125A,C314T,G537T,A558T,A694T	12.17	1.59	0.26	10.32	73.29	2.38
1608	ATTACCAAAGATATA	C286T,C295A,C400G	1.14	78.46	0.31	0.21	18.47	1.41
1609	ATTACGATTCAGGTT	CT37C,A45T,G67A,C92T,A120G,C121G,T126C,C184T,G222A,C376A,C384G,G500A	NA	NA	NA	NA	NA	NA
1610	ATTACTAAAATTTCG	A203T,TG498T,T508A,T672C	26.87	2.91	2.07	8.34	36.52	23.29
1611	ATTACTTATTTGCTG	G330T,C369T,C442T,G584A,T688C	33.83	44.28	4.89	0.5	14.48	2.03
1612	ATTACTTCACCGAGT	T29A,G51A,TG111T,T634C	63.4	6.37	5.39	1.76	20.33	2.76
1613	ATTAGAAATCATCAT	A177G,A334G,C455T,A597T	60.59	8.03	6.57	1.94	20.92	1.94
1614	ATTAGACAAGACTTT	A44G,C587A	69.91	5.14	3.69	3.26	15.94	2.06
1615	ATTAGCAAATATCTT	G488A	60	6.56	5.21	2.22	20.08	5.91
1616	ATTAGCTTCATTAA	A246G,T354C,G531A	32.56	35.57	4.78	0.68	22.57	3.83
1617	ATTAGGACAGATAGG	G99A,A641T,A694T	34.01	1.08	0.43	31.75	32.29	0.44
1618	ATTAGTACCGTTCGA	A101G,A156G,T207A,G330T,T409A,T419C,T528A,T660A,G680T	61.52	0.15	3.09	6.95	26.89	1.39
1619	ATTAGTCTATCGGCT	G433A,G471A,C527T	39.18	7.99	2.67	5.17	43.41	1.58
1620	ATTAGTGGCATAGGT	A65G,C418A,G574T	61.9	7.83	6.5	1.79	18.61	3.37
1621	ATTAGTTTACCACTT	A356T,T498C	48.01	9.82	5.58	3.45	32.1	1.05
1622	ATTATAAAATTCCAT	C176T,G644A	66.35	4.74	5.19	0.9	20.76	2.05
1623	ATTATAGAGATATCT	G683T	66.69	10.61	4.88	2.23	12.67	2.91
1624	ATTATATCTCAATCT	WT	63.3	5.52	5.62	2.15	22.1	1.3
1625	ATTATATTTCCCTTC	G651T,G671A,G690T	72.36	6.1	1.9	3.05	14.3	2.3
1626	ATTATCATTAAATAC	TG274T,T655C	48.4	8.23	10.65	1.84	26.82	4.07
1627	ATTATCCACTTGTTG	T283C,G331A,G366A,C369T,A483G	68.16	1.58	8.48	2.51	17.79	1.48
1628	ATTATCGACTATAAA	A462G,A592G	58.75	5.37	5.01	5.01	25.14	0.72
1629	ATTATCGATCAATAG	G72A	66.52	7.11	4.44	2.01	17.39	2.53
1630	ATTATCGTAATATA	T557A	64.8	16.55	5.59	0.94	8.68	3.44
1631	ATTATCTGTCTGATA	A214G	53.96	6.04	6.28	1.62	30	2.1
1632	ATTATCTTCTCAGTC	G271T,G507A	81.85	2.93	4.92	1.19	8.2	0.9
1633	ATTATGAATAACGAC	C482T,T625C	77.62	3.19	4.69	1.5	11.73	1.27
1634	ATTATGATTAATACG	C114T,C591T	66.02	4.81	4.28	2.14	20.9	1.85
1635	ATTATGGCTGAGTCT	C149A,T195A,T216C,A238T,C612T	56.48	4.62	6.81	1.09	27.91	3.09
1636	ATTATGTCCTTTGTA	T283A,G352T	20	38.52	3.94	0.66	30.82	6.06
1637	ATTATTAATGTTCTT	G242A,C397T,T586C,T621A,C668T	65.61	3.17	6.49	1.39	19.89	3.45
1638	ATTATTATTCGTCCT	A65G,T329C,T504G,G538T	1.69	0.51	0.51	44.26	47.63	5.41
1639	ATTATTCCTGCAGTA	A44T,C149T,C411T,T625A,T669A	58.31	2.15	8	4.3	26.13	1.11
1640	ATTATTCGCTTGTTT	G106A,G250C,G353A,T616A,T696C	62.36	0.34	1.27	10.41	21.75	3.87
1641	ATTATTGACGATCGA	A44G,G97A,T270C,A578G	68.74	8.08	4.55	2.67	14.16	1.8
1642	ATTATTGCGTGGTTT	G276A,T321C,C442T,G673T	52.41	21.28	4.04	1.61	18.49	2.17
1643	ATTATTGTAATTTAC	WT	61.63	7.69	5.92	1.89	20.56	2.31
1644	ATTATTTCTTGCTAT	TG605T	63.72	11.95	3.76	1.55	16.82	2.2
1645	ATTATTTTCACAGAC	G331C	81.87	0.67	4.91	2.98	8.63	0.94
1646	ATTCAAATACACGTG	T200A,G306A,C375A,A492C,C588T	79.17	0.97	4.17	3.58	10.28	1.83
1647	ATTCAAATTGTAATG	WT	62.17	6.88	5.49	2.05	21.65	1.76
1648	ATTCAATTTGCGGAT	G113C,G227A,T672A	61.35	9.98	6.01	1.92	18.69	2.03
1649	ATTCAGTGACACTAA	T136C,A188C,A220T,G331A,A513T,T581C	76.66	3.66	4.8	1.83	10.98	2.05
1650	ATTCATACTGTCCAT	C478T,T553C,G564A	69.82	8.23	4.86	2.22	12.83	2.04
1651	ATTCATTACATTTAA	G95GA,C589A	65.67	6.94	5.98	2.27	17.1	2.04
1652	ATTCATTTAAAAGTG	A408T	57.09	8.64	6.1	1.73	23.14	3.29
1653	ATTCCAAATCACCAT	T347C,G359A,G531A	71.52	2.94	3.88	2.23	17.76	1.66
1654	ATTCCACATATCTAT	T70C,AC156A,A167T,T205A	65.19	6.41	5.41	2.76	18.21	2.03
1655	ATTCCATCACCTTGA	C41G,T53A,T86C,C94T,C237T,T321A,T329C,C423T,C511A,G623A	71.02	10.14	3.73	1.93	9.33	3.83
1656	ATTCCATTATTTTCG	A88G,T140C,A296T,C400G,G422A,C458A,G507A,G531A,G607A	0.36	79.43	0	0.18	15.52	4.51
1657	ATTCCGATGTGTTT	G97A,C324T,C637A,A667T	53.84	27.16	4.48	1.14	8.48	4.9
1658	ATTCCGCATGGAGGT	T241A,G258A,G496A,C612A	56.69	11.27	5.06	1.87	21.2	3.91
1659	ATTCCGCTATCAAAA	C55T,C197A,A209G,T249C,G309T,G318C,A653T,C675T,G695A	NA	NA	NA	NA	NA	NA
1660	ATTCCTAGATGTTTG	WT	68.08	5.38	3.08	3.08	15.39	4.99
1661	ATTCGACTCTTCTTT	T207A,A494C,G595A,G644A	72.24	10.01	3.95	1.54	9.03	3.22
1662	ATTCGAGCTAAGTTT	C490A	65.45	8.63	5.01	2.12	16.63	2.17
1663	ATTCGATTAACCCA	T86C,A251T,G525A,T650C	46.81	3.61	2.4	6.49	32.41	8.29
1664	ATTCGCCGCACCCCC	C110T,G190A,G297T,G313A,A694T	2.94	36.47	0	1.76	58.24	0.59
1665	ATTCGGACTTATCT	WT	70.85	8.88	4.1	2	11.82	2.35
1666	ATTCGGTTATGAGCG	AG256A,T419C	67.19	4.18	7.88	2.49	15.65	2.6
1667	ATTCGTTAATGATAG	G72C,G377A,G555A,G674A	75.58	3.54	5.88	1.32	11.45	2.22
1668	ATTCGTTGCTACTGA	T532G	64.18	10.34	5.98	1.56	14.07	3.87
1669	ATTCGTTTATTAGCT	T289C,A385T,G525A,A542G,A572G,G583T	5.99	7.32	0.6	2.16	60.07	23.86
1670	ATTCTAATCCGGTCC	GA427G	50.17	21.36	4.64	0.75	21.46	1.62
1671	ATTCTATCAGTCTTA	WT	64.23	11.02	6.03	1.24	14.35	3.13
1672	ATTCTATCCCTGAAC	C61T,A219G,A253G,G379T,G395A,G461A,G517A,T539C,G554A	53.43	1.48	1.9	9.84	14.39	18.95
1673	ATTCTATGTTAGAAG	C62T,C324T,T498C,C591T,C624A,G670T	42.06	11.19	6.08	5.32	32.17	3.17
1674	ATTCTATTACACGTG	WT	63.82	7.02	5.34	2.32	18.8	2.7
1675	ATTCTCAAATGGGAA	A57G,C121A,T429A,C497T	45.35	5.84	5.04	5.04	34.88	3.84
1676	ATTCTCCTTCATTCA	WT	68.88	6.22	5.39	1.87	15.56	2.08
1677	ATTCTCGGAATAATT	G112A,A513G	60.91	7.89	6.02	1.88	20.3	3
1678	ATTCTGGCTGTATCG	C145G,T401C	69.79	4.46	4.6	2.01	17.27	1.87
1679	ATTGAAAAATTCGAG	G49A,G257T,T277C,A368G,G402A,G690A	63.18	2.57	1.76	5.82	24.63	2.04
1680	ATTGAATGTTCAACC	G180A	55.29	4.07	6.5	2.44	26.83	4.87
1681	ATTGAATTTTATATG	G538T,G607A	59.14	5.26	5.26	3.24	25.65	1.45
1682	ATTGAGATACACAAT	G230A,A253G,T274C,G430A,T532C	29.46	43.22	2.5	0.9	21.89	2.03
1683	ATTGAGTAGTACTAC	G457A	65.75	5.51	5.32	2.53	18.24	2.65
1684	ATTGATACTGTTATG	T249C,C396T,T650C	57.7	1.79	4.87	3.59	28.46	3.59
1685	ATTGATCCGCTCCCG	T249C,T280A	14.9	47.27	4.79	0.54	28.38	4.12
1686	ATTGATCGAACCGCA	C603A,T632A	63.5	4.67	4.29	2.65	22.73	2.16
1687	ATTGATGTTTGTGGT	G366A,C403A,T459C,T616C,A641G	61.79	12.14	4.73	2	16.29	3.05
1688	ATTGATTCTTAATTG	G80T,G607A	64.94	7.62	4.95	3.17	17.33	1.99
1689	ATTGATTTTGCCCTT	C94G,T137C,T174C,G294A,G579T,A609G	68.49	4.28	4.64	3.45	17.83	1.31
1690	ATTGCACGCACTATT	G72A,A152G,T655A	67.32	7.83	3.85	2.6	16.16	2.24
1691	ATTGCATGGGCCAGA	G35A,T53C,G189T,C288A,GT353G,A597G,T628A	9.34	59.53	1.75	0.58	26.85	1.94
1692	ATTGCCATTTTATTA	A371G,G479T,A580G,T650A	12.68	27.34	0.9	1.9	53.95	3.23
1693	ATTGCGGTAGATTTC	A59T,C193T,T289A,C364T,G499A,A513G,C646T	6.43	54.68	0.53	0.27	35.38	2.69
1694	ATTGCTAGAATACCA	T173G,C369T,T419A	52.5	11.87	8.75	3.75	20.63	2.5
1695	ATTGCTTAACCTCGC	T136A,T536C,G555T	61.52	9.72	4.35	1.61	14.37	8.43
1696	ATTGGATCATGTCCC	G275A	64.65	5.9	7.87	2.13	16.44	3
1697	ATTGGCATGTTTCAT	C197A,G332A	82.57	0.52	4.89	3.94	6.74	1.33
1698	ATTGGCGACTCATAG	T283A,G500T,G566A	3.37	70.84	1.68	0	21.12	3
1699	ATTGGCGAGGGACAG	A299T,G674A	72.45	3.41	6.11	2.37	14.15	1.51
1700	ATTGGGGACTATAAC	G79T,G331T,G379A,C450T,A541G,T543A,T621G	89.84	0.52	2.61	3.23	2.83	0.95
1701	ATTGGGTATACCGCG	T31C,G161A,G196A,G217A,C397A	79.09	1.36	4.25	1.78	10.89	2.62
1702	ATTGGGTGATTGTAA	C154T,A226AG,G387T,G574A,G617T,T669A	65.93	8.98	5.27	1.93	13.28	4.6
1703	ATTGGTGACGGAATA	G204A,A365G,G441T,A483T,G529T,C577A	73.13	2.66	5.25	0.93	16.62	1.41
1704	ATTGGTGTAACAAGG	A268G	67.17	2.6	10.68	1.85	15.67	2.02
1705	ATTGGTTCTATTTTG	WT	67.49	4.23	6.23	2.9	16.7	2.45
1706	ATTGTAACCATAAGG	C110A,G235T	59.1	11.8	5.58	1.5	19.42	2.59
1707	ATTGTATAGTCACAC	G72T,G97A,G104A,C158T,A253C,T704C	66.65	6.82	5.49	2.52	16.9	1.62
1708	ATTGTCCCAATACTG	T70C,A232T,T432C	71.53	3.5	5.53	2.49	15.03	1.92
1709	ATTGTCGGACCGCCC	C367T	53.83	13.9	5.03	2.2	22.58	2.45
1710	ATTGTCTATATGAAG	G27T,T111A,A236T,C478T	67.33	8.73	4.79	2.82	14.93	1.4
1711	ATTGTCTTATAATCT	T86C,A451T,C646A	58.09	5	6.91	3.8	24.29	1.91
1712	ATTGTGCCAACTTCC	T212A,G331T,A368G,G372A,T390A,T429C,GC517G,T532C,G569A,G635T,C665T	3.6	0.72	9.36	2.16	81.3	2.87
1713	ATTGTGTCTCGCGAG	C164G,A296T,G313A,C399T	0.48	81.87	0	0.14	14.6	2.9
1714	ATTGTTATAATGCGA	T131C,G215A,G271A,C273T,GC362G,A597G,G599A,C646T	54.3	0	0.75	4.87	39.32	0.75
1715	ATTGTTCGGAGTGAC	A188G	64.86	6.91	4.11	3	19.43	1.69
1716	ATTGTTTAAATTATA	A252T	54.55	9.95	6.29	2.1	24.08	3.03
1717	ATTTAAGCACCCTCC	T291C	23.92	44.95	2.01	0.94	26.12	2.07
1718	ATTTAATGCTAAATA	C61T,G243T,T270C,C497T,A547G,G651A	57.85	3.23	3.38	5.22	25.85	4.48
1719	ATTTAATTGGGTCTA	G331A,G457A,G656C	77.94	0.33	2.77	4.54	12.19	2.22
1720	ATTTAGAAACCCGTA	T140C	65.31	6.62	5.49	1.43	19.11	2.04
1721	ATTTAGAACTCTAGC	A44G,G81T,T111A,T136C,T174C,G190A,G331C,T628A,T634A	73.82	0	9.23	4.33	12.24	0.38
1722	ATTTAGCAATCACTT	WT	62.22	6.7	6.21	2.64	20.93	1.3
1723	ATTTAGGGTGTGTAC	C165T,T446C,G488A	0.69	82.01	0.18	0.23	13.14	3.74
1724	ATTTAGGTATCCAT	T536A	64.19	5.61	2.81	3.61	20.86	2.92
1725	ATTTAGTGGGCACCG	A475G	65.31	5.46	6.63	2.34	17.54	2.71
1726	ATTTAGTTCACCTAA	T212C,G517GC	35.79	2.63	13.68	0.53	43.68	3.69
1727	ATTTATAAAATCTAT	T240A,C406A,C493T,C546T	63.48	3.47	5.16	3.69	22.32	1.88
1728	ATTTATAAAATTTAG	WT	63.63	7.22	4.82	1.75	20.37	2.2
1729	ATTTATATTTGGAGA	T84C,G524T,C527G,A572G	1.25	0.16	0.08	9.04	23.16	66.3
1730	ATTTATCATTCCCAG	A167G,C415G,A648T	52.65	16.33	4.49	1.22	24.49	0.82
1731	ATTTATCCTAACATA	A96T,T137A,G242A,G537A	30.42	1.39	0.8	5.17	60.23	1.99
1732	ATTTATCGAATAATC	WT	60.86	5.58	8.27	2.38	20.56	2.36
1733	ATTTATGAATCCGAT	C142A,T207C,G272T	73.22	3.28	8.2	3.83	9.29	2.18
1734	ATTTATTGTTTACTA	WT	61.42	6.09	5.87	2.46	22.02	2.14
1735	ATTTATTTCACAGTC	G342T,G353A,G362A,G422A	72.72	1.41	4.61	1.77	11.57	7.92
1736	ATTTATTTCATCAAG	G43C,C149A,C453T	57.52	9.23	4.56	2.59	23.84	2.27
1737	ATTTCAAGTTCCCTA	C278T,G381T,C530A,C577T,T605A	6.02	0.75	0	24.81	63.16	5.26
1738	ATTTCACAATCCGTT	C60T,C169G,GC362G	57.9	11.06	5.28	1.53	21.5	2.72
1739	ATTTCACGAAACTTT	T46C,C146A,CA159C,T162C,T267C,A494G	76.98	2.96	5.07	1.85	11.79	1.34
1740	ATTTCAGGCATTCAA	A477T	66.48	11.2	2.91	1.61	16.05	1.74
1741	ATTTCCACGACAGCA	A343T,T386C,C612A	60.98	9.29	5.6	1.96	19.73	2.43
1742	ATTTCCACGCTTATG	T116A,C145A,A296G,A383T,C602T,G636A,G639C	0.37	88.94	0.05	0.15	6.34	4.15
1743	ATTTCCCTTCTCCCG	C397A,C519T,G673T	74.83	1.64	4.21	3.43	11.77	4.12
1744	ATTTCTAATTTGTAG	C93A,A246T,T386C,G487A,A578G	61.92	5.05	7.13	1.92	21.04	2.94
1745	ATTTCTACAGTTTGT	G310A,G480A	68.33	2.05	5.16	4.54	17.26	2.67
1746	ATTTCTGTGAGTTTT	A78G,G559T,T631A	58.85	4.74	5.12	2.7	24.5	4.1
1747	ATTTGAACAGTTCTA	C363A,T498A,G538A,C596A,C637T,T655A,T688C	58.75	7.57	5.99	2.92	22.87	1.9
1748	ATTTGAATGGTCGAT	A65G,C121G,A226C,A338C	64.12	10.46	5.26	1.92	16.49	1.76
1749	ATTTGCAAATGTAGC	A118G,A160G,T274C,A285G,T347C,A590G,T692A	15.47	1.59	0.43	29.05	53.32	0.14
1750	ATTTGCCCCAAACCC	A220C,G574A	69.61	9.36	6.34	1.73	9.95	3
1751	ATTTGCTAATAAACC	A45G,T207G,C598T,G606A	56.66	4.74	4.87	3.08	29.74	0.9
1752	ATTTGGATTAATTGG	T39A,T174C	57.77	3.32	6.46	2.09	28.27	2.09
1753	ATTTGGCATCTGGTG	WT	66.17	6.93	5.24	2.09	17.75	1.82
1754	ATTTGGTTGAGTAAG	WT	65.12	6.16	5.41	1.68	19.67	1.96
1755	ATTTGGTTTGTTATA	G352A,C410T,A462T,A558T	62.44	8.06	6.69	1.55	19.72	1.54
1756	ATTTGTAAACAACAC	T386A,A594G,G664T	51.86	2.86	4.03	4.81	35.48	0.96
1757	ATTTGTGGCCTTTCT	G272A,G349T,C423T,C571T	68.13	1.14	4.07	8.42	17.6	0.64
1758	ATTTGTTAAGATTCA	C185G,A338G,C369T	NA	NA	NA	NA	NA	NA
1759	ATTTTAACCGCATAG	G27A,C512A,A513G,T672A	42.69	3	2.53	6.55	30.14	15.08
1760	ATTTTAACTGAGTGG	C345T,C546T,G629A	39.8	13.31	2.86	2.99	38.72	2.32
1761	ATTTTAAGAATAGCT	C28T,T638A	56.93	5.2	6.23	2.4	28	1.24
1762	ATTTTAAGAGGTATT	A120T,A166T,C463T	68.57	3.91	6.06	1.87	18.29	1.29
1763	ATTTTAGTTTAAAAG	C630A,T655C	60.95	7.21	5.64	2.07	21.89	2.24
1764	ATTTTATAAATCTCT	TG50T,T620C	51.77	9.33	7.78	2	27.56	1.56
1765	ATTTTATGATGTAGG	C114A,A371T	61.93	10.32	5.02	1.74	18.41	2.58
1766	ATTTTATTACGATAT	T46C,C54T,T137A,T413A,A580T,A685G	59.25	10.09	4.86	2.61	21.5	1.68
1767	ATTTTCACGGAGTTA	G51A,T528A	48.03	3.63	3.05	3.78	39.29	2.2
1768	ATTTTCATAGTGAGT	T179A	60.61	6.21	5.37	2.15	24.22	1.44
1769	ATTTTCGAGAGGAAC	G583A	64.86	11.02	4.31	1.44	15.65	2.72
1770	ATTTTCGAGTATTTT	WT	65.26	7.05	5.19	2.44	18.14	1.93
1771	ATTTTGAGCCAGGGA	C478T,G496T,G538T,T604A	62.45	3.55	4.06	4.77	22.37	2.8
1772	ATTTTGATCTGGACA	G234T,T386C	62.27	9.17	3.75	1.66	21.31	1.84
1773	ATTTTGGGGTTCCCC	T126A,G355A,T420G,T509C,T605A,T616A,G635A	26.78	17.63	1.02	4.41	48.81	1.36
1774	ATTTTTGTACACATT	WT	61.86	5.81	7.54	2.98	19.62	2.19
1775	ATTTTTGTTCGCACA	A547T	66.3	6.17	4.3	2.09	18.17	2.97
1776	ATTTTTTCAAATTCA	A120G,T206A	66.73	7.31	4.01	2.43	16.73	2.79
1777	CAAAAAAACCCCTTT	G51A,C129A,C145T,C497T	51.4	5.85	3.86	6.09	28.8	3.99
1778	CAAAAAGTATACCGA	T117C	67.58	7.39	5.24	2.4	15.54	1.85
1779	CAAAACAAGCAAAAG	C530T	62.42	4.27	5.17	3.8	21.94	2.4
1780	CAAAAGACTTATCAT	A118T,T293A,G304T,T419A	12.23	8.49	6.24	0.58	31.62	40.85
1781	CAAAAGTGAATTATT	WT	63.62	5.91	5.91	2.25	20.69	1.62
1782	CAAAATACTACTTTA	A443T,A475T	7.27	73	0.76	0.7	17.34	0.94
1783	CAAAATATTTCTGAA	G56T,T132A,G189T,T267A,T581A	71.37	3.1	6.07	2.59	15.49	1.38
1784	CAAACCCATTAATGT	A177G,T289A,G313T,C458A,T704C	2.21	66.84	0.7	0.2	28.25	1.8
1785	CAAACCTGATTCATA	G49A,C142T,T504A	12.34	1.41	0.78	13.12	66.7	5.64
1786	CAAAGGCCAGGAATT	T136A,A246T	66.22	6.47	5.48	1.9	17.06	2.87
1787	CAAATACTGTTAATT	G97T,C336T,C630A	18.46	48.25	3.94	0.87	24.61	3.86
1788	CAAATATGAGCTTTT	T126C,A219T,A224T,C400A,T409A,A663T	66.46	3.11	4.33	2.78	21.78	1.54
1789	CAAATCGGGCGAAGT	A188T,G388T	60.04	6.57	6.05	1.9	22.49	2.95
1790	CAAATGTATAATATA	C36T,G66A,T122A,G134A,C145T,A213T	51.1	4.01	5.84	2.92	33.95	2.18
1791	CAAATTAAAATGGCT	T136A,A425G,C497A,G617A	40.61	21.05	3.87	1.86	27.93	4.69
1792	CAACAGATCCTCCGA	T74A,A160T,A177G,G510A,T536C,G568A,T622A,A694T	20.24	1.62	0.4	18.22	58.71	0.8
1793	CAACAGGCGTAGATA	G244A,T300C,C369T,G427T,T429A,G457T,C458A	44.85	32.73	2.42	2.42	15.75	1.82
1794	CAACATAACTATCCA	C144A,G271A,A560G,G575A	29.97	0.52	0.94	6.21	9.76	52.59
1795	CAACATAAGATCAAA	G460A,C598T	36.32	30.82	3.1	1.26	27.48	1.03
1796	CAACATGTTTTCGTC	G377A,T389C	73.98	1.72	4.75	2.61	15	1.94
1797	CAACATTTAAAACAG	G87A,T347C,T508C	70.48	2.09	5.05	4.31	15.99	2.08
1798	CAACCAATAATATGG	T153C,T174C,T394C,T616C,T660C,A689G	69.41	1.9	3.01	3.6	21.06	1.02
1799	CAACCAATGTTTGAT	G30A,G370A,G377A	63.9	4.63	4.63	1.77	23.32	1.76
1800	CAACCACTACTCAGC	G72T,T201C,A285T,A653T,G690T	70.38	3.42	2.16	8.11	14.24	1.7
1801	CAACCATTGTTACCA	WT	64.14	7.62	5.84	1.98	18.18	2.24
1802	CAACCGAATAATCTG	WT	63.52	6.52	5.72	2.3	19.89	2.05
1803	CAACCGATCTATGTG	A78G,G100A,A120T,C458T,G680T	65.51	4.19	5.43	2.41	21.12	1.34
1804	CAACCTCATATCTGT	G211C,C269T,G452A,A483G,C552T	3.87	0.83	12.7	0.28	61.03	21.28
1805	CAACGATAGGTATTT	AG78A,G284A,A368G,A385G,C405T	77.62	1.85	4.91	2.63	11.56	1.42
1806	CAACGTAACGGCGTT	G32C,A167T,C175A,C237T,T386C,G584A	56.36	6.35	8.73	0.8	23.01	4.76
1807	CAACTGGAGACGTTA	C107A,TC132T,G183A,C185T,A194T,A238T,T283A,T327A,A456C,C521A,T543G,A594G	NA	NA	NA	NA	NA	NA
1808	CAACTTTCAGTCGTC	A285G,T325C,A338T,CT464C,TG553T	61.25	26.54	2.42	1.94	6.34	1.5
1809	CAACTTTCTTATTGT	A156T,G481A,A485T,A494T	49.61	17.57	3.36	1.94	20.03	7.5
1810	CAACTTTGCTCGGGT	G79T,G500T	69.83	8.12	4.7	1.98	13.34	2.03
1811	CAAGAAACTTCAGAG	A213G,T283C,T315C,G330A,T374C	43.82	5.27	9.73	0.82	38.82	1.54
1812	CAAGAATTATCAGAT	A44G,T341C,T419C,T432C,G444C,G575A,C665A	2.74	87.37	0.23	0.39	8	1.26
1813	CAAGATTCAGACTAT	G43A,T131A,T401A	61.65	5.83	6.31	2.42	23.3	0.48
1814	CAAGCACATTTCCAT	WT	63.18	6.94	4.98	2.67	19.44	2.79
1815	CAAGCACCCCTTCTC	C185T	NA	NA	NA	NA	NA	NA
1816	CAAGCATCTACTTGA	G76A,A101T,C119T,A338G,T465A,A578T	54.02	13.74	4.04	2.73	22.45	3.02
1817	CAAGCTATGCACCCT	G106T,T131C,AG256A,TG634T,A663T	66.45	11.14	4.5	1.73	12.93	3.26
1818	CAAGCTCTGCGCCTG	T247A,C288T,G310T,TC465T	75.38	0.84	5.9	5.23	11.64	1.01
1819	CAAGGAAATCATATG	A456T	71.2	9.72	3.62	1.94	10.87	2.65
1820	CAAGGCAAATGCGGA	AC141A	67.46	7.61	5.19	1.94	16	1.8
1821	CAAGGTCACTCATAT	WT	65.83	6.11	4.92	1.57	19.79	1.76
1822	CAAGGTTAAAGCGTG	G250T	64.15	7.42	5.57	2.09	18.85	1.91
1823	CAAGTATACTGTCTG	C34T,C178T,A263G,C522T,C627A,T655C	NA	NA	NA	NA	NA	NA
1824	CAAGTATTAATGGTG	G244A,T704C	61.22	4.49	7.33	2.63	22.37	1.96
1825	CAAGTCACCGGAACA	G66A,G75T,G196A,A238C,T270C,G316A,T347A,T504C	4.5	0.78	0.29	21.38	57.42	15.63
1826	CAAGTGATGGTACAA	G470A,G510A,G524A	NA	NA	NA	NA	NA	NA
1827	CAAGTTATCATCTAT	G480A,G686A	40.1	20	3.25	2.16	27.99	6.5
1828	CAAGTTCGCGCACAA	WT	66.99	6.55	5.61	1.49	17.16	2.2
1829	CAATACCCGTTCGTC	G422A	63.95	4	5.21	1.91	13.63	11.3
1830	CAATACTAACTGCAT	T267C,C530T	61.3	2.26	7.06	3.67	23.02	2.69
1831	CAATACTTATATTCA	G318A,T327C,TG347T,A428G,AC477A,A513G,G569A,C570T,C596T	NA	NA	NA	NA	NA	NA
1832	CAATAGACTACTTTA	G276A,CG376C	75.16	1.15	6.31	3.58	12.71	1.09
1833	CAATATATCATCTCT	T528A,C551T	44.98	3.35	1.34	5.85	36.28	8.2
1834	CAATATTAGGTACCG	G227T,G242A,A343G,G391A,C434T,A475G,T616C	40.18	13.39	5.66	1.63	24.11	15.03
1835	CAATATTATGAATCA	WT	63.34	7.62	5.95	2.09	19.11	1.89
1836	CAATCACATCTACAT	A96T,C110A,T325A,C435T,G635A	63.01	4.25	3.58	2.41	19.87	6.89
1837	CAATCAGCTTTAACA	T108C,C143G,T341C,G676A	73.53	1.3	3.9	1.3	19.31	0.66
1838	CAATCAGGCTTCATG	C157T,A236T,C269G,T270C,A523G,G595A	0.97	0.28	0.16	13.21	20.13	65.24
1839	CAATCCAAACCTAGT	T102A,A523G,C567G,A572G,G693A	1.78	0.8	0.32	48.07	46.94	2.09
1840	CAATGAGTAAAGTTT	A45G,A105T,T116C,T321A	59.06	12.99	4.6	2.03	17.52	3.8
1841	CAATGATTTGGGCAC	T409A,G564A,G606T	69.62	6.15	6.87	1.48	13.68	2.19
1842	CAATGCGTTGTGTTA	A44G,A156T,G235A,A238G,A343G,T394G,C665T	66.47	9.52	4.17	2.31	16.43	1.1
1843	CAATGGATGTATTGA	G395A,T622C	70.82	7.12	3.87	1.99	12.55	3.65
1844	CAATGGTTTCAGTAC	G306A,T565C	82.95	0.58	4.49	3.68	6.75	1.54
1845	CAATGTAATTGACCG	T102A,C154T	64.58	5.88	4.95	2.24	19.86	2.49
1846	CAATTATTTGTTCAA	T509A,C588T	62.12	4.56	5.26	3.86	22.81	1.38
1847	CAATTCATAATCTGG	AC156A,G353T,T373C,T498A,T536C,C600T,T610A	79.69	2.54	4.18	2.24	9.13	2.22
1848	CAATTCCGGTTTAGT	T280A,T565C	17.17	48.84	4.32	0.33	23.03	6.3
1849	CAATTGACTCCCTCT	T38C,A141G,C193A,C248A,C405T,C571A,A594G,C612A,G656T	65.94	1.09	3.77	5.16	23.43	0.6
1850	CAATTGCAGTAATCA	T137C,G192T,T206C,A547G	68.35	9	5.66	1.49	12.89	2.61
1851	CAATTGCTATAATAA	C77G,A236T,G352T,C412T,G422C,C467T,G484T,T613A	32.46	14.56	5.22	2.24	42.17	3.35
1852	CAATTTAGCGTGGGA	A96C	65.66	6.38	5.77	2.33	17.57	2.3
1853	CAATTTATCCATTTA	WT	61.39	7.44	6.18	2.54	20.67	1.78
1854	CAATTTCAAGTTTTG	A209G,G210A	45.85	3.43	6.5	2.17	40.07	1.99
1855	CAATTTTTGCAGGTC	T283C,C404A,C490T,T545C,G690A	70	1.23	2.02	4.32	21.73	0.7
1856	CAATTTTTGTTGTAT	G89A,G109A,C119T,A213T,G310T,C410T	59.33	0.61	3.06	2.14	33.33	1.53
1857	CACAAAAGCAGAAAA	T283A,T628C	4.97	44.67	2.79	0.5	42.28	4.78
1858	CACAACCCCCCCGCA	G73T,G91C,C146A,T267C,G501A,G544C,C646G,C662T	79.46	2.66	4.94	1.72	9.42	1.8
1859	CACAAGAAGTATTTA	T31C,T53C,G221T,A337C,C406T	64.42	4.97	6.09	2.03	20.09	2.4
1860	CACAAGCCGTTGTTC	T212A,T267C	3.49	1.17	22.09	1.17	70.92	1.17
1861	CACAATTGGTACCCT	T136C	66.83	7.11	5.75	2.54	15.4	2.37
1862	CACAATTTGATTCAC	C184A,A542G	52.95	6.86	5.88	2.94	29.41	1.96
1863	CACACATGCTCCTCT	T249C,G645A	67.26	9.24	4.07	1.62	14.34	3.47
1864	CACACTACTTCAGAC	A65C,A82G,C107T,T122C,A141T,C369T,T459C,C478G,A580G,G676A	47.98	10.79	1.73	6.93	31.6	0.96
1865	CACACTCTTGGTTTA	T179A,A226G	64.45	7.98	5.06	3.02	17.82	1.67
1866	CACACTTGACGCCGT	T137C,G676T	67.03	5.2	2.6	2.39	20.82	1.96
1867	CACAGCATCGCTTGC	T361A,A443T,C476T	7.01	79.96	0.44	0.44	11.43	0.72
1868	CACAGCTCCCCATTT	T131C,C675G	62.09	4.86	2.81	4.21	23.65	2.38
1869	CACAGGCAAGCAATA	A492T,T604C,T638A,G644A	64.99	6.61	4.83	2.31	19	2.26
1870	CACATAACGTGTGTG	G355A,G479A	34.03	29.4	2.68	1.82	29.71	2.35
1871	CACATAATAGCGTCA	G35A,A105T,G387T	55.44	7.95	6.4	1.66	26.12	2.43
1872	CACATACTGGAAGGT	A246G,T440A,A451G,G471A	22.46	49.43	2.1	1.94	22.78	1.29
1873	CACATAGAGGTACAG	C125A,C320T,C407T	24.51	45.08	2.81	0.67	21.97	4.97
1874	CACATATGAATTTTC	C624T	65.14	7.83	5.79	2.11	16.87	2.27
1875	CACATGGAAAACCGT	A69G,A334T,C577T,A594G	29.84	1.12	0.37	7.02	59.41	2.24
1876	CACATGTCCTTCTCC	A533G,T634C	68.46	8.11	5.15	1.68	13.2	3.39
1877	CACATGTGGTCGCGC	WT	66.26	8.2	4.5	2.25	16.26	2.53
1878	CACATGTTTTCTAGC	WT	66.8	6.05	6.26	2.09	16.91	1.89
1879	CACATTTACACCCTT	A224G,C273A,A473T,G651A,A689T	77.33	3.17	3.22	3.22	12.04	1.03
1880	CACATTTCAGATCCC	G66A,C336T,A578T,G606T	21.78	50.85	2.83	0.97	19.59	3.97
1881	CACCAGATCGAGTCT	C398T	70.44	2.09	5.6	2.33	16.78	2.75
1882	CACCATACCTATCCC	WT	64.72	6.62	6.11	2.2	18.66	1.69
1883	CACCATTCACTCTGA	WT	64.45	6.53	6.19	2.2	18.68	1.95
1884	CACCATTTAGACTAT	A219T,A220G,G426A,G671A	61.65	4.72	7.95	1.72	19.44	4.51
1885	CACCCAATGAATTCT	C33T,T86G,G271A,C375A,G444T	0.72	90.14	0.05	0.17	8.37	0.55
1886	CACCCATTTACGCTT	T179C,G180A,A209C,C265T,C295T	39.66	21.56	5.17	1.72	29.31	2.57
1887	CACCCTTTAATTTCA	C41T,C668A	60.26	6.81	5.24	2.35	23.58	1.75
1888	CACCGGTAGCTTTTA	T392C,C502T	71.57	9.54	5.47	1.92	10.75	0.75
1889	CACCTCATTCTTCCG	A166T,C231T,G639A,T661C	67.57	4.96	3.84	2.52	19.15	1.96
1890	CACCTCTAAATTCCT	G196A,T205C,G221T,G316A,T325A,G379A,T672A	67.24	3.66	6.2	1.75	16.68	4.45
1891	CACGAGTTGCGCAAA	G128A,A678G	72.18	4.77	3.44	2.56	15.13	1.92
1892	CACGATTCGGATCAG	T240A,G313A,G318A,T622A,G639A,A678G	28.42	30.23	2.84	0.77	34.62	3.12
1893	CACGCCACACCCGGA	T74C,T115C,T137A,T321G,A443T,G657A	7.24	84.33	0.51	0.19	6.79	0.94
1894	CACGGAGCGGCGTTG	A78C,T351A,T605C,G614A	78.46	1.65	3.81	3.68	11.35	1.05
1895	CACGGATACTATCCC	A105G,C143A,G357T,G471T,A523T	1.16	0.21	0.1	3.48	42.64	52.42
1896	CACGGCAGTACATCC	C37T,A474G	63.73	6.51	4.17	2.48	19.81	3.3
1897	CACGGGAACGACATA	G161A,G284A	69.07	4.94	5.81	1.7	16.61	1.86
1898	CACGTAAAGCCATAT	A96G,C149A,G208A,C384T,A473G,T491C,A597T,G670T	38	30.35	4.44	2.11	22.57	2.53
1899	CACGTACATTCCAAT	A47T,T111A,A191G,A456C	67.36	6.25	6.25	2.08	17.71	0.34
1900	CACGTACTCTCCGAT	T634A	68.24	8.56	4.94	2.04	14.14	2.09
1901	CACGTTAATTGACAT	T655C	62.98	7.03	5.79	2.54	19.63	2.03
1902	CACGTTGGGTCTACC	C511T,C649G	73.13	8.5	5.9	1.24	9.58	1.64
1903	CACTAGTGACGGTCT	T48A,C133T,G349T,C396G,G544A,T632A,G679T	51.19	3.81	4.13	2.28	36.74	1.86
1904	CACTATGTTGCTCGA	AC59A,G457A	62.91	5.84	6.91	2.14	20.06	2.15
1905	CACTATTCCATAAGA	WT	64.84	6.91	5.61	2.25	18.13	2.26
1906	CACTCAGCCAAAAGT	A202G,G271T,C493T,A597T,T631A	75.47	2.14	4.71	2.56	13.71	1.4
1907	CACTCCCGCTAACAA	WT	63.9	7.6	6.51	2.57	17.48	1.94
1908	CACTCGACTTGGGTA	C164A,G208T,T274C,G414A,A485C,A541T,TG581T	64.89	8.13	1.93	3.21	16.27	5.56
1909	CACTCGGACATACTG	C295T,A368C,T622A,T628C	33.73	39.14	3.12	0.6	20.81	2.59
1910	CACTGACTAGATACC	G32A,T315A,C398T	60.13	4.25	4.74	3.44	23.69	3.77
1911	CACTGCACCACACAC	A296C,G623A	0.66	87.83	0.04	0.09	10.46	0.92
1912	CACTGCTTTCTTGTC	T31C,T212C,G230C,A356T,T394C,C415T,CT464C,C482A,T616A	7.71	15.44	4.18	1.28	67.84	3.54
1913	CACTTATAACTTAGG	WT	60.56	6.63	5.91	2.05	23.16	1.68
1914	CACTTCCTGGCACTA	T137A,T186A,T212C,T283A,C307T,A337G,C668A	NA	NA	NA	NA	NA	NA
1915	CACTTTGAACGGAA	C393A,C567T,G635T,G651A	62.09	16.89	2.8	2.07	13.47	2.68
1916	CACTTTGTATATCTC	G49A,C143G,T174C,C684A	63.36	8.02	4.94	2.43	19.23	2.02
1917	CAGAAATGCTACTTA	C143A,G352T,CA384C,G448T,C476T,C490T,T516A,A541G,T562C,A580G,G593A,G676T	1.74	0.44	0.21	43.14	51.63	2.83
1918	CAGAATTCTGATCAT	C339A	24.59	44.13	3.85	0.55	23.67	3.21
1919	CAGACAATGTTCCTA	A648T	64.88	5.99	5.73	2.24	19.04	2.12
1920	CAGACAGTAATGTC	A47T,G230A,T401C,G470T,C493G,C551T,A609G,C654T	47.54	7.59	2.95	3.37	24.75	13.8
1921	CAGACGACATTACAC	G52A	63.33	10.46	5.77	2.17	16.35	1.93
1922	CAGACTAGTAACGTC	C143A,T270A,G629A,G645A,T660C	74.65	5.08	2.04	3.72	13.12	1.39
1923	CAGACTATTTTACTA	G72T,A358G,G695T	5.99	40.85	0	3.17	48.94	1.05
1924	CAGACTGGCTTTATT	G377A,A685T	67.89	3.94	5.38	2.08	18.53	2.18
1925	CAGAGACCGCCCGCG	WT	68.39	6.4	5.87	1.69	14.81	2.83
1926	CAGAGTACAAAGGAC	T137A,T179C,A301G,G322A,G366C,G460C	2.29	77.5	0.5	0.33	17.75	1.63
1927	CAGAGTGATACAAAG	C55T	62.84	6.15	7.15	1.75	20.2	1.91
1928	CAGATAGCAATGTA	T111G,T325A,G388A,T498C	50.66	8.97	2.24	2.92	28.48	6.72
1929	CAGATCACGCTTCAG	WT	64.79	7	5.63	2.15	17.87	2.56
1930	CAGATCCATCATTTC	A246T,A428T,TG498T	6.01	8.58	0.24	14.85	56.69	13.62
1931	CAGATCCGATGCTCG	G517GA	67.76	5.87	5.87	2.45	13.55	4.49
1932	CAGATGAGGACTGAT	A78T	68.96	5.91	4.63	2.01	16.36	2.14
1933	CAGATGATAACTATA	T174A,T179A,G217C,G507A,C520T,C591T,T643G,A678G,T688A	68.79	6.94	4.63	3.47	14.45	1.72
1934	CAGATGCAACATAAC	A44T	56.96	8.1	6.77	1.46	25.27	1.45
1935	CAGATTTCATCCCAA	G100A,C125T,C129T,A547G,T565A,G582A	66.35	5.19	5.19	1.35	20.23	1.7
1936	CAGATTTTAAACGCC	C393A,G573T	51.59	22.15	5.66	1.86	14.82	3.92
1937	CAGCAAACTGTAAGA	G331A,C367G,G370A,G500T	75.02	2.45	4.7	2.05	14.89	0.89
1938	CAGCAGCCTATTAAT	T545C	60.37	5.87	5.35	2.09	24.28	2.04
1939	CAGCATATGATAGTC	G481T	50.36	15.96	4.1	2.73	23.67	3.18
1940	CAGCCCGCGTATACG	G52T	61.79	7.07	5.2	2.21	21.72	2.01
1941	CAGCGATTATATAAA	C135A,A358G,G387A,T394A,A506T,C646T	0.8	62.44	0.06	0.25	32.43	4.01
1942	CAGCGCAAGTCATTC	G221T,T241C,C312T,T325C,C400A,C442T,T581C,T672A	27.22	50.51	3.53	0.59	16.5	1.65
1943	CAGCGTATCCCGTTA	T401C,C687T	65.56	4.05	5.35	2.84	20.74	1.46
1944	CAGCTAGTGTAGCCA	G32A,C63T,G239A,T240C,A263G,A506G	1.55	3.54	0.11	26.32	55.24	13.24
1945	CAGCTGGTCGTCTCC	WT	73.5	6.31	4.09	1.87	12.37	1.85
1946	CAGCTTACTACCTAC	T111A,G221A,C314A	43.63	12.87	5.64	2.21	32.6	3.06
1947	CAGCTTAGTAGGGA	G388A,GC402G,T432C	63.14	5.23	4.65	4.36	12.7	9.92
1948	CAGCTTCTGTAACTA	A147T	64.49	6.12	5.19	2.5	20.04	1.65
1949	CAGCTTTGTCAATTG	A447G	3.19	81.53	0.5	0.4	13.97	0.4
1950	CAGGACGTGTAACTC	T137C,GC433G	60.17	6.97	6.62	1.86	22.77	1.61
1951	CAGGCTAATTGACGA	A96T,A238G,C458T	70.44	4.81	5.12	3.05	15.23	1.34
1952	CAGGGGTGCACCTAA	T130C,C369A,G593T,C646T,C662T	50.22	1.35	1.2	16	30.64	0.6
1953	CAGGTTGTTAACCTT	C33T,G76C,G332A,C399A	84.53	0.46	3.24	4.27	6.44	1.05
1954	CAGGTTTTGAGTGTT	WT	65.85	6.74	5.92	1.88	17.49	2.13
1955	CAGTAATCTTTGCAA	G258T,G379T	71.35	1.62	6.84	2.3	13.22	4.68
1956	CAGTAGAACAATACT	C546T,T692C,G702A	17.87	0.71	0.71	16.03	64.26	0.42
1957	CAGTAGGCATATAAC	G49A,A371G,A383T,G471T,T634C	3.98	74.96	0.34	0	18.31	2.41
1958	CAGTCGGCGCCACTT	C159G,A236T,GC260G,C397G,T465C,G524T,T581A	0.74	0.3	0.02	5.01	7.85	86.07
1959	CAGTCGTCCCCCCAG	C512G,A663T	52.44	3.7	3.13	6.46	22.8	11.46
1960	CAGTCTCTTTTTACT	C530T	60.19	2.71	6.64	1.47	27.27	1.72
1961	CAGTCTTGGTCTCCA	G71C,T212C,GC517G,A648T	21.78	1.55	1.55	1.55	69.78	3.78
1962	CAGTGGAATTAGCAA	C33T,A78G,A141AC,G204C,A246T,T491A	69.56	5.67	6.19	1.6	14.9	2.09
1963	CAGTGTATATTTTAA	C587T	63.73	6.2	5.37	2.74	19.38	2.57
1964	CAGTGTCACTTGTAA	C287A,A462G	60.29	8.49	4.32	3.17	22.59	1.14
1965	CAGTGTTCCGTACAA	T386C,TG469T	57.06	5.82	4.2	2.42	27.28	3.22
1966	CAGTGTTGGGTTAGG	T122C,T389C,A408G,G457A	79.14	1.19	5.05	3.18	10.21	1.24
1967	CAGTGTTTACCAAAG	G507A,C618T	67.58	7.48	8.31	1.94	11.91	2.79
1968	CAGTTAATCAGTATT	G27A,T86A,T117C,C154T,G330A,C396T,T508C,G559A,T701A	53.37	1.99	7.04	3.21	29.79	4.6
1969	CAGTTATTATCGTTT	T70C,T108C	66.88	5.83	5.36	2.02	18.11	1.81
1970	CAGTTATTGTTGCCG	A214G,C290A,A475G,A483G,C659T	41.61	15.03	5.49	2.03	32.94	2.9
1971	CAGTTGAACCCGTTA	G49A,A96T,C142A,T170C,C522G,T562C	7.58	0.6	0	10.78	38.71	42.33
1972	CAGTTGGATTTTGTA	T351C,G426T,A477T	58.21	5.91	4.49	2.19	22.89	6.31
1973	CAGTTGTGACTTTGG	G27T,C119T,G163A	71.5	5.65	3.49	1.61	13.71	4.04
1974	CATAAACATTGCGTA	T631A,C652T	67.14	6.96	4.65	1.93	16.82	2.5
1975	CATAAATACATCGGA	WT	66.53	6.3	5.73	1.99	17.83	1.61
1976	CATAACGTCGATTTA	T240C,A263G,GC395G,T419C	69.83	2.76	5.48	2.51	16.71	2.7
1977	CATAACTATCAAGTC	A232T,G500A	65.68	11.36	6.94	1.85	12.82	1.35
1978	CATAACTGATCTAAT	T317C,C369T	63.58	5.01	5.73	2.85	20.94	1.89
1979	CATAAGTTATTTCGA	A371T	60.8	9.83	3.46	1.34	22.46	2.1
1980	CATACAGCTTCGCTC	A69G,T315C,T545G	71.53	2.79	6.11	1.93	16.55	1.08
1981	CATACATAGTTTCG	WT	70.54	8.79	3.17	1.48	12.81	3.21
1982	CATACCTGAGACGCT	A105G,C129T,T136A,G352T,G377A	68.47	0.55	6.99	3.56	19.53	0.9
1983	CATACGATGCAAATA	C571A,A572G,G644A	66.87	4.31	4.51	3.11	19.88	1.32
1984	CATACGCTCAAAGAA	G79A,C450T,C571T	72.93	1.26	3.79	4.91	16.27	0.84
1985	CATACGTGGTAAAAT	T173C,A547G	66.99	8.46	4.36	1.75	16	2.45
1986	CATACTTGTGCTACA	G161T,G230A,G448T,T610A	47.24	7.98	2.8	1.36	31.01	9.6
1987	CATAGAATGAATCTT	TG553T	70.54	10.57	4.26	1.74	9.91	2.98
1988	CATAGACTTTATCAG	G417A,G452T,A578G	67.4	5.38	6.89	2.12	16.43	1.77
1989	CATAGCACTCATCTC	A438T	51.44	12.97	5.58	2.11	24.14	3.77
1990	CATAGCGCATCCACC	G192C	63.61	6.17	5.77	2.46	20.05	1.93
1991	CATAGGCGTTTTAAA	T74C,A105G,T111A,T122C,C139A,T200C,T389A,C591G	76.44	0.77	5.42	3.01	12.9	1.46
1992	CATAGGCTTCTATAA	WT	64.27	7.21	5.96	1.97	18.78	1.82
1993	CATAGTGGTGTATAT	A338G,T613C	58.27	9.15	5.55	1.54	23.34	2.15
1994	CATAGTTTTTACTCC	G196A,CA437C,A443G,T459C,A492T,T601C,C603A,T621C,T632A	0.98	74.72	0.26	0.72	21.82	1.5
1995	CATATATCGAAGCGC	G250A,G331T,T419A,T432C,G480T,T638C	75.4	0.74	3.76	6.8	11.78	1.52
1996	CATATCCCTTAATTC	G537A,G629A,G651A,A663T,G690A	6.06	1.01	0.34	14.14	78.11	0.34
1997	CATATCGGTTCAAGT	C77T,C139T,A236G,G538A,T661A,T688C	61.86	4.83	5.2	3.65	21.99	2.46
1998	CATATTGGTTCGTCT	C157T,G196A,C624T,C649T,A663T	72.54	3.11	4.45	2.6	15.47	1.84
1999	CATCAAATACCATCA	C28T,C165T,G350A,A462G,G574T	82.28	0.42	5.64	3.37	7.07	1.22
[truncated: 3,792 more rows]

## Sheet: HEK293T rep3
ID	barcode	mutations	AE inclusion (%)	AE skipping (%)	first IR (%)	second IR (%)	full IR (%)	other (%)
1	AAAAAAAGCCTTTGG	T216A,G250C,T351A,T562C,T622A	73.17	2.05	4.77	3.41	14.55	2.06
2	AAAAAACCTATTTAA	G457T	59.44	5.2	6.26	2.01	25.03	2.07
3	AAAAAACTCTCAATT	A78G,C110T,T126C,A263T,T321A,CT418C,C437A,A513T,T536C,A572T,G579T	59.74	8.94	4.15	2.56	24.44	0.16
4	AAAAAATAGTCATGG	T130C,C168T,G260A,T354C,T429A,C493T,G606A	41.96	14.08	3.56	2.56	36.84	0.99
5	AAAAAGCACGTATCG	WT	65.84	6.35	5.13	1.83	19.15	1.7
6	AAAAAGGCCAGGATA	T39C,T170C,A535G	59.4	9.87	4.46	3.02	22.45	0.81
7	AAAAAGTGACCTAAA	WT	64.09	6.84	5.18	1.19	21.23	1.47
8	AAAAAGTGTAAACCT	A188T,G690A	52.79	2.46	0.82	4.91	37.37	1.64
9	AAAAATAACTCCGTT	G326A,T459A,G488C	48.76	16.93	3.89	2.35	26.07	2
10	AAAAATCACTGTTGT	C155T,A337G,C514T,T581TA	80.31	1.69	2.7	1.24	13.49	0.56
11	AAAAATCGCTCCAGG	T207C,A285T,A560G,C624T	20	0.34	0.9	8.88	28.21	41.66
12	AAAAATGATACTTAC	G190A,T200A,A238G,C527T,T539A,T545A,T621A	52.85	5.86	9.08	3.22	27.53	1.46
13	AAAAATTATTTACTA	A209G	53.83	4.38	5.29	0.73	33.94	1.83
14	AAAACACAAGGCCCG	T38G,A447G,C527T	3.69	76.98	0.1	0.29	17.47	1.46
15	AAAACACTAGGATCC	C28A,A160G,A166T,T195C,G352T,G445A,A597G	0.34	88.53	0	0.2	10.18	0.75
16	AAAACTTTTGTTATA	WT	55.98	7.08	5.97	1.32	27.76	1.88
17	AAAAGAACTTTATAA	A226AG,T432C	69.07	2.84	5.97	1.7	19.5	0.92
18	AAAAGAATTGACCAG	G322C	56.53	12.46	5.28	1.43	22.07	2.24
19	AAAAGACTTTAGCAC	G189A,C364T	39.9	26.23	3.18	0.79	27.03	2.86
20	AAAAGGCCGACAGTT	A120G,A268T,G352T,G480T,C589A	62.43	2.03	6.09	3.55	21.32	4.58
21	AAAAGGGGCTTTTAC	T115A,C142A,G276A,C512T,G525A,T660C	72.14	0.95	4.01	6.87	12.4	3.62
22	AAAAGTGTTGGACCA	T38C,T50A,T136C,G297T,T386A,G449A,G481A,T616C	0.19	61.41	0.06	0	15.62	22.72
23	AAAAGTTCTGATTCT	C520T,T545C	65.32	5.76	4.53	1.48	20.55	2.36
24	AAAATAAAGATTCAT	C119T,G686A,T704C	60.12	6.31	7.09	1.67	22.5	2.31
25	AAAATACCTAGTCTT	T386C,T413A,T446C	0.43	78.37	0.05	0.11	20.24	0.8
26	AAAATAGGATCGTAG	T201G	68.93	9.4	3.13	1.72	14.43	2.38
27	AAAATATAAGTTCAA	C77T,A236G,T329A,A513G	68.27	2.25	5.14	2.5	19.53	2.3
28	AAAATATTTTGGTAG	T137A,G444T,A456T,C467A,TG498T,C668G,A682T	0	50.8	0	0.4	44.79	4.01
29	AAAATCGGCCATGTC	C55T,T111C,C344T,A416G,C454A	53.07	14.44	2.53	1.08	26.71	2.17
30	AAAATCTATTACCTC	T137A,A141T,T162A,G239A,C363T,T386C,C467A,G554A,G617A,C624A	4.58	3.37	0.13	7.68	47.44	36.79
31	AAAATCTTAATCCTG	A120G,T390A	43.85	19.68	4.51	2.59	28.42	0.96
32	AAAATGCAACCATAC	T46G,C94T,T140C,G349T,C393T,A485T,G651A	51.71	18.11	3.15	1.18	22.97	2.89
33	AAAATGGTAGATGAC	G243A,C288T	71.95	2.43	4.1	1.15	18.57	1.81
34	AAAATGTCCAAGTTT	T325A,TG672T	58.95	8.42	2.46	1.22	26.14	2.81
35	AAAATGTCGGAGTGG	T70C,A203T,C262T,G388C,C437T,C552A,G584T	65.68	6.82	4.75	1.34	18.2	3.21
36	AAAATTGCAATGTCT	A177G,G349T,A368T,G457T,C571A	72.17	1.52	5.16	3.34	17.01	0.8
37	AAACAGCATGCATTA	AG220A,A385C,TG553T,G676A	64.02	16.52	3.23	0.37	13.58	2.27
38	AAACAGTATACAATA	G100T,A343G,T386A,C400A,G673A	59.3	7.87	4.56	1.71	25.43	1.13
39	AAACAGTGTGGAAAC	A65T,G346A,A477T,C502T,G505A,G651A,C684T	76.09	5.19	5.13	0.56	11.55	1.47
40	AAACAGTTGTAGGTC	A251G	61.1	8.84	4.18	1.15	22.12	2.61
41	AAACATATTTGACGA	G32A,T697A	55.76	7.62	6.51	1.42	27.17	1.52
42	AAACATCGTTGATTA	T274C,T291C,A337T,A365T,G676T	10.62	43.19	0.46	0.23	41.34	4.16
43	AAACCAATTGTGGGA	G230A	57.34	8.53	5.56	0.79	25	2.78
44	AAACCAGCCATAACT	G67A,T137C,C364G,G426C,T446C,G487T,C511T,T553A	0.32	90.19	0	0	8.17	1.32
45	AAACCCGTGATGGTA	G230T,T325C,A443T,A462G,T526C	5.26	65.13	0	1.32	26.64	1.65
46	AAACCTGCGAAAGCT	G332C,T354G,T432A,T504C,T536A	3.8	0	0	30.38	59.49	6.33
47	AAACGAACAAAATCG	A443G,G501T	6.3	82.92	0.59	0.05	9.26	0.88
48	AAACGAATCATTTTC	A365G,A408G,G460A	25.68	49.74	2.03	0.94	20.14	1.46
49	AAACGATAAAGGCGA	G244T,T374C,G391A,G507C,T545C,T625A	46.69	18.68	7.78	1.17	25.29	0.39
50	AAACGATTGACAGTC	G380GA	66.97	4.37	4.24	2.14	19.41	2.86
51	AAACGATTGTGAACT	G109A,C125A,T174C,T186C,T255C,T270G,G316A,A408G,G427A,CT503C,G517A,G524A,G559T,C591A,T669C	NA	NA	NA	NA	NA	NA
52	AAACGCAATTTACTA	T532C,T622A,G671A	60.34	9.05	6.46	1.19	20.77	2.19
53	AAACGGACACCTGAT	G72A,T200C,A226G,TG498T,G510A,C675G,G679C,A682G	51.71	2.93	0.81	13.7	25.12	5.72
54	AAACGGTGGGCCCAT	T543A	62.24	6.49	4.72	1.18	24.48	0.88
55	AAACGTCATAAGGTA	G104A,A105G,G109A,C159T,G196C,T666A	62.39	6.1	5.96	1.46	22.33	1.76
56	AAACGTGATCTATCG	G480T,A547C,C668A	42.82	21.25	2.21	2	25.92	5.8
57	AAACGTTACCTGATT	T218A,T249C,A494T	46.39	8.58	5.12	3.47	35.09	1.35
58	AAACTAATCTTGATG	G75T,T532C	62.46	7.87	5.03	0.84	20.26	3.54
59	AAACTATAATAATTC	G51A,T413A,CA442C,T610C	0	48.88	0	0	43.96	7.16
60	AAACTCGGTAAGTGT	G227A,C393A	50.79	16.27	5.65	1.2	23.32	2.77
61	AAACTCGTACTTATC	A268C,G370A	63.76	13.11	2.91	0.73	16.76	2.73
62	AAACTGACCTCCCCT	A44T,A252T,G362T,T469C,C576T,A689G,A694T	2.73	0	0	6.36	89.09	1.82
63	AAACTGCACTCATAA	WT	57.52	6.41	4.61	1.8	28.06	1.6
64	AAACTTAGGTAATTA	G76T,A167T	61.2	6.44	4.81	1.72	23.75	2.08
65	AAAGAGGGGGGGGTC	WT	68.13	6.42	5.27	1.15	16.78	2.24
66	AAAGCAAGTTTTTGA	T84C,G106T,T136A,C157T,C287T	78.75	0.64	6.1	2.88	10.49	1.14
67	AAAGCCTTACGACTG	G544A	60.99	5.18	4.99	1.85	24.21	2.77
68	AAAGCGTACATCTTC	G328A,C489T,T532A	72.11	11.53	3.92	0.55	10.54	1.34
69	AAAGCGTTCTTAAGT	A96T,G128A,A182T,T280C,CA437C,T581G,T666C	12.86	17.14	4.29	1.43	62.85	1.43
70	AAAGCTCTATCGGCG	WT	68.27	9.29	3.86	1.47	14.72	2.38
71	AAAGGACTGGTCCAT	C34T,G254C,T274A,A443T,G480A	1.38	71.26	0.2	0.2	24.8	2.16
72	AAAGGATGATGTCCG	T108C,C598T	75.21	6.35	3.22	0.86	12.27	2.08
73	AAAGGCCTTTGCCCA	A578G,C600T,C659T	65.63	7.85	4.84	1.42	18.18	2.08
74	AAAGGGGCTCATTAA	G66T,C454T,G690C	71.7	11.82	1.58	2.13	11.46	1.31
75	AAAGGTGTCTGTCCA	A214T,T413A,G593A	NA	NA	NA	NA	NA	NA
76	AAAGTATGTATACAG	T39C,T137G,G651A	69.39	6.46	4.37	1.14	17.11	1.52
77	AAAGTCACCTTCTAT	C114G,T136A,A232G,C646T	68.42	3.34	3.11	3.87	19.12	2.15
78	AAAGTCCGGCATTTG	T108C,T302C,A337G,C376A,T440C	75.83	1.68	4.02	3.69	12.75	2.02
79	AAAGTCCTTAGTTTG	G575A,T699C	60.35	10.16	6.6	1.76	18.03	3.09
80	AAAGTCTCCGCCAGG	G381A,G479A,C497T,G606T,T650G	43.57	2.62	3.14	7.35	37.27	6.04
81	AAAGTCTTTAACTGG	T29C,A141AC,T317C,T498C	62.18	1.15	4.08	3.14	28.53	0.92
82	AAAGTCTTTGCTAGT	A141T,A356T,G377T,T413A,C458A,C514A,G645A,G647A	69.66	3.03	3.52	1.4	19.09	3.3
83	AAAGTTTGTATAGCG	C138T,A181T,C312T,G480T,T536A	14.79	18.54	1.32	0.22	54.09	11.04
84	AAATAATCTTTCTAC	G98T,G575T,A641C,G656A	65.43	8.71	4.62	1.61	16.26	3.37
85	AAATACACTTCACAT	T186C,T206C,G381A,G561A	74.42	0.79	4.72	1.18	17.32	1.57
86	AAATACAGGTCACTT	C121T,C154A,C158A,C519T,T601A,T613C,G644T,A663C,A682T	47.28	0.45	2.27	1.82	47.73	0.45
87	AAATACTAAAGGATC	T207A,T291A,T302C,T317A,G645A	7.99	60.19	0.63	0.31	28.68	2.2
88	AAATACTTTATACTA	T126C,T354C,G664A	42.97	10.82	6.03	0.93	36.94	2.31
89	AAATAGAAGCTATAT	T153A,A653G	61.85	3.12	2.41	4.01	27.27	1.34
90	AAATAGCGTCTCATT	T136C,A343G,C642T	55.35	8.39	4.59	2.3	27.32	2.06
91	AAATATATAACGTAG	C145T,T321A,T498A	50.86	9.74	5.33	2.04	28.09	3.95
92	AAATATCATGGGCAA	G72A,C169A,A282G,G382T	5.2	63.42	1.3	0	23.74	6.33
93	AAATATCTAGCCATT	G319A,A425G,T459C,T553G	40.37	25.43	2.92	1.26	27.89	2.13
94	AAATATGAGCACTAC	A224T,G421A,G460A	4.24	75.98	0.35	0.07	18.18	1.18
95	AAATATGCGTCTTTT	A181T,G221A,G366A,A663G	46.54	8.39	7.3	1.28	34.68	1.81
96	AAATATTCATTGGTT	A299T,G584A	76.02	4.87	5.07	1.18	8.95	3.9
97	AAATCACGTCGTACA	A78T,A166G,G313A	46.93	21.64	3.37	1.07	23.36	3.63
98	AAATCACTACGCTAA	G196T	59.36	6.32	5.84	1.63	23.63	3.21
99	AAATCATTCAAATAG	G134C,C151T,T173A,G271T,C415T	41.47	18.77	6.66	0.34	32.25	0.51
100	AAATCCAGAAATCGG	C77A,G99T,T116A,C142T,C269T,T270C,A337G,C360A,G639A	81.77	1.71	3.16	1.48	10.03	1.85
101	AAATCCGATCTATTC	T111C,C135T,A385T,T401C,A641T	57.58	4.74	5.1	2.96	27.61	2.01
102	AAATCCTTTCCCGGT	T179C,T504C	1.61	0.34	0.11	15.63	65.87	16.44
103	AAATCTTATATGAAG	C63CT,C642T	60.34	5.35	5.04	1.5	25.73	2.04
104	AAATGACCTTTAAAT	T84C	60.51	6.73	4.58	2.15	23.08	2.95
105	AAATGAGAAGTTTGA	A252G	53.44	13.16	4.89	1.82	24.23	2.46
106	AAATGAGCTGTTGTG	WT	63.36	5.24	4.76	1.91	22.22	2.52
107	AAATGATTATAATAT	C121G,T335C,C345T	47.2	15.93	5.02	1.05	28.5	2.3
108	AAATGCAGTATGTTG	T504C	3.01	0	0.17	12.52	71.61	12.69
109	AAATGTCCTTGCTAT	G89A,A202G,T329A	66.55	3.55	4.88	2.03	21.27	1.71
110	AAATGTTTAAACGTT	A147T,A156G,T440C	63.44	6.39	4.62	1.9	22.69	0.96
111	AAATTAACTTCGTAC	A78T,C436T	61.36	6.39	4.22	2.4	22.28	3.35
112	AAATTAATACACTGG	G161A,A252T,C345T	37.29	23.05	4.98	0.23	30.4	4.05
113	AAATTACATTTTTTA	C266A	56.02	3.81	16.13	1.17	20.24	2.63
114	AAATTAGATACCTTA	T70C,T90C,T130C,A251G,C286T,T429C,C450A,C576T,G673T	55.23	13.56	3.24	3	20.2	4.77
115	AAATTAGTAATCAGG	G234A,T625A	48.2	10.41	4.63	1.67	32.13	2.96
116	AAATTATATGTCGTG	C143T,A166C,G192A,G310A,A451G,T586A	72.47	3.16	6.32	0.56	12.63	4.85
117	AAATTATCCTGGTGC	A96C	65.45	7.04	4.27	1.22	19.9	2.12
118	AAATTGATCATCAGT	T186C,T439A,T516C,A535T	58.38	2.45	3.15	2.8	31.81	1.4
119	AAATTGTCTGCACCT	T504A,C511T,GC517G,G614A	3.66	0.28	0	25.74	61.32	9
120	AAATTTATAATCAAA	T206C,C490A	63.06	6.71	4.3	2.22	20.81	2.89
121	AAATTTATACATTCT	T131C,A213G,G331T,T354C,C521A	72.72	1.94	6.41	0.75	17.29	0.9
122	AAATTTATTATTTGA	WT	58.08	4.79	6.84	2.96	26.31	1.02
123	AAATTTGTATTGAAA	G89T,T132C,C287A,C363T,T631A,A689G	45.47	23.77	4.15	1.21	21.55	3.84
124	AAATTTTAAAGGTCT	A202G,G461T	50.06	17.85	4.15	0.66	25.51	1.77
125	AAATTTTTATAATAA	G43T,G103A,A177C,G211A,G297C,G544C	NA	NA	NA	NA	NA	NA
126	AACAACAGCTTTTTG	A462T,C596T	65.82	8.2	4.89	1.43	18.29	1.36
127	AACAATCTAACTATA	C28T,T212C,G310T,A337G,A408G,A456G,GC510G,T516C	46.72	0	7.38	2.46	36.89	6.56
128	AACAATGTTTTCTCC	A425G,C436A,T632A	57.4	7	2.43	1.71	30	1.46
129	AACAATTATCAGCGG	WT	64.79	4.53	5.63	2.27	21.21	1.56
130	AACACCTTTTAAAGA	G30A,C138T,A268G,T389C,C476CA,C520T,A592G	66.13	0.44	9.06	1.93	20.14	2.3
131	AACACGCTTGGCTAC	C360T,T413A,G583A	37.56	28.98	4.19	1.24	25.08	2.96
132	AACAGACAATGGCGA	G378A	67.42	2.48	5.64	1.79	19.31	3.35
133	AACAGGGCTATTCC	T241A,G258T,T321G,A597G	58.08	8.49	5.46	1.21	22.63	4.13
134	AACAGGTAAGAATGG	A101G,C278A,G359A,T616C,T621C	64.23	5.29	4.79	0.5	23.93	1.26
135	AACAGTACTTTCGGC	AC156A,G221T,T335C,C552A,C640T	67.32	4.62	2.59	2.17	21.2	2.11
136	AACAGTCGACCATTA	C436T,T605A	58.75	3.73	2.84	3.06	28.53	3.08
137	AACATAAATCGGCTC	A188G,T390A,A456T,T613A,C652T	38.75	18.44	3.44	0.62	37.5	1.24
138	AACATAACTGTACGG	A541C,A594T	62.13	4.29	4.56	3.18	24.21	1.64
139	AACATACCGTATCCC	T90A,A251T,C286G,T291C,A475T	6.58	47.98	1.26	0.51	39.12	4.55
140	AACATACTAATGTCA	C151T,T504C,A580G	2.3	0	0	15.21	79.27	3.22
141	AACATATGTTCGTTG	T267A,G645A,T658C	74.37	2.34	5.81	1.59	13.68	2.2
142	AACATCAACTGACGG	G445C,T516A,T661A	0.72	0.72	0	1.43	70.16	26.97
143	AACATGTATACCAAC	T48A,C85T,A506G,T625A	0.67	1.85	0	18.68	73.07	5.73
144	AACATGTCTATTAAT	A177G,C463T	58.27	5.44	4.99	3.18	25.85	2.28
145	AACATTAGGTCTTTA	C142T,G445A,T459C,T504C,G635T	1.48	5.33	0	1.48	64.78	26.93
146	AACATTATCTTGCTC	T389A,C489T,TC586T	84.42	1.24	3.69	1.81	7.78	1.06
147	AACATTCAAATGATC	G128A,G318A,G673T	59.33	11.2	4.27	0.78	21.77	2.65
148	AACATTTAAAAGCCT	G32A,G97A,G103A,T347G,T373A,G544C	48.97	11.2	5.46	1.18	30.29	2.89
149	AACATTTGAGTTTCA	C369T	44.61	16.77	5.53	1.24	29.84	2.01
150	AACATTTTCTGGTAG	T394A	55.4	10.71	5.18	1.77	24.35	2.6
151	AACCAACGATATATC	A263G,A356T	58.21	12.03	4.38	1.54	22.32	1.53
152	AACCAATAATTCACA	T291A,G488A,C567T	3.61	60.49	0.57	0.15	30.3	4.88
153	AACCACTAGTCCTCA	C339T,G537T	18.88	35.93	2.99	0.96	37.38	3.86
154	AACCACTTTTAGAAA	T240A,C511T,C611A	66.82	5.59	6.29	1.19	17.72	2.39
155	AACCAGTTTGTAGGT	T386A,A443G,G656T	7.9	74.61	0.84	0.23	15.8	0.62
156	AACCATACCCTCTTG	C150T,G380T,T394A	63.91	8.16	5.13	2.4	15.28	5.13
157	AACCCACCTTGCATA	T46C,G183A,T274A,A296G,C463T,C618T,G635T	0.33	84.85	0	0	13.74	1.08
158	AACCCAGTGATAACT	A83G,A592G	60.54	3.37	5.24	3.3	26.74	0.81
159	AACCCCTTATGGTCC	A45T,C107T,A236G,G319A,A485T	69.66	4.98	5.63	2.06	16.36	1.31
160	AACCCTCCTTACACT	T195C,A220G,T347A,T361C,T543A,T625C,T672C	70.69	1.5	4.28	1.29	20.54	1.72
161	AACCGACCAGTTGGT	A220T	64.34	9.1	4.72	1.57	18.21	2.05
162	AACCGTAAAGAAAGT	C61A,G127A,G161A,C175A,C266T,T291A,T325G,A358G,G372A,A443T,T469A,A542G,T553C,A578G,TG581T,A663G	0.5	89.65	0.17	0	2.67	7
163	AACCGTTTTGTCTTT	G342A,C404T,C423T,G525A,T528G,C703T	20.43	10.64	1.52	1.18	36.32	29.9
164	AACCTAAGCCTATGG	C93T,G128A,G242A,C410A	66.67	4.03	1.83	0.74	24.54	2.19
165	AACCTAGGAGCCCAT	T116C,A166G,C184T,T241A,T335C,T392C	NA	NA	NA	NA	NA	NA
166	AACCTATATGCCTAA	G297T,T386A,C591T	0.23	73.1	0.11	0.11	25.54	0.91
167	AACCTATCTTCCAGG	TG274T,G421T,T625C	43.18	15.57	4.21	0.68	27.27	9.08
168	AACCTTAGGATAACC	A209G	60.63	5.96	4.64	1.24	25.68	1.85
169	AACCTTATACGGCGC	C411T,C423T	55.4	6.46	5.41	0.45	30.03	2.26
170	AACGACTGCTGGATA	AC156A,T247A,TG308T,C345A,T429A,T498A,C514T	66.52	7.89	7.27	1.08	16.09	1.15
171	AACGATCTGGGGAAA	A443T,A542G,T548C,T604C,T634A,G651A	8.82	74.05	0.5	0.5	15.87	0.25
172	AACGCCGAGTACCAT	WT	64.76	6.54	4.87	1.34	20.3	2.19
173	AACGGATCTAAGAGC	T108C,G123A,A160G,A213G,A263T,T361C,A416G,A456T,G524T,TC586T,G702A	0.53	0.18	0.18	5.85	10.69	82.57
174	AACGGCTTCTGCGTT	G204A,C345A	50.5	30.22	1.15	0.76	13.23	4.13
175	AACGGGAATACTCTG	T108C,A663C	61.78	2.61	2.44	2.97	28.45	1.74
176	AACGGTCCACGACAG	T327A,A358G	6.12	67.63	0.63	0.06	23.33	2.24
177	AACGGTCTCAAGTTA	T86C,C178A,A252G,T283C,G330C,T347C,T536A,G540T,C567A	NA	NA	NA	NA	NA	NA
178	AACGGTGATCTTTG	A160G,G223T	73.25	8.8	3.16	1.16	11.46	2.17
179	AACGTAGTATCTACC	A47T,C248A,G378A,C437A,G556A	67.49	4.93	8.52	2.24	13.01	3.81
180	AACGTGATAGTCGTA	T116A,T207C,T548C,G617A	65.91	8.36	4.23	1.19	18.35	1.96
181	AACGTTCAGTACGCC	C107T,A337G,T621A	74.37	3.01	5.07	1.43	14.79	1.34
182	AACGTTGTTCTTGCT	C62T,T126C,C611G,C646T	68.74	2.3	1.12	5.93	20.29	1.61
183	AACTAATTTCAATAA	G353C,A590G	70.74	1.2	4.18	2.09	20.89	0.91
184	AACTACTATTCATCC	C490A,A663T	65.3	5.5	3.91	2.03	21.24	2.01
185	AACTAGTCCTTTTGA	WT	62.55	6.34	3.32	2.59	22.05	3.16
186	AACTATCGACATTAG	T241C	62.28	6.56	4.05	1.69	23.4	2.01
187	AACTATCGTTAGGGC	G161A,A338G,C344T,A383G,G426T,G647T	34.36	19.15	3.93	1.37	29.57	11.62
188	AACTATGCTTTACAT	A177G,A213T,C687A	NA	NA	NA	NA	NA	NA
189	AACTCAAAAATGTAA	WT	61.81	5.77	4.65	1.77	24.21	1.78
190	AACTCACGTGTGCGT	C320T,T638C	28.14	29.66	4.41	1.53	32.88	3.39
191	AACTCAGGACTTGTC	C450A	65.39	5.09	4.56	1.31	20.29	3.35
192	AACTCGATTAACTA	T140A,G563A	57.3	6.12	2.92	1.95	30.6	1.12
193	AACTCGCAACGTCTA	C320T,G331A,GC517G,A578G,C612T,C640T	NA	NA	NA	NA	NA	NA
194	AACTCGGATACATTT	WT	60.04	5.86	5.6	1.63	24.92	1.95
195	AACTCGGTACCAGAA	T179C,C520A,C612A	56.62	2.94	3.25	3.04	31.03	3.13
196	AACTCGTATGGTCCG	G228A,G275A,G382A	41.5	5.03	9.44	0	30.18	13.85
197	AACTCTAAACTTTGT	T42A,G79T,G97A,G275T,T293C,T327C,A383G,C397T,C415T,T516C,TC586T,T650A,A678T	78.58	1.18	3.03	3.55	12.48	1.18
198	AACTCTCTGAATAAT	WT	56.1	6.79	4.56	1.82	28.67	2.06
199	AACTGAACTATTAAC	C164T,G445A,G693A	0.27	83.54	0	0.09	15.11	0.99
200	AACTGATTAGAAGCC	A147C,T604A,C675A	62.14	8.86	4.27	1.22	22.29	1.21
201	AACTGCCATAGGATT	G97T,G495T	65.07	5.49	3.96	2.83	20.04	2.6
202	AACTGCGCTGTATGA	A199G,A383G,G639T	66.12	9.42	5.45	1.94	16.37	0.7
203	AACTGTACGATACGA	A181G,G441C,T545A,A592T	57.98	9.7	4.85	1.82	24.25	1.41
204	AACTGTCGCTTGGAC	AC59A,AC156A,T212A,G222T,G245A,T409C,G433A,A483T,A685T	NA	NA	NA	NA	NA	NA
205	AACTGTCTCATAGTT	C37A,G80T	67.25	6.9	2.87	1.15	18.39	3.44
206	AACTGTTAACCGTCT	A44T,A101T,G113A,G381A,T622C,T632C	78.51	1.36	4.99	1.97	10.41	2.76
207	AACTGTTTAATTTTT	T247C,A560G	13.24	0.28	0.85	10.14	43.1	32.39
208	AACTTACAGATTTAA	G322A,A323G,A506T,A592T,G644T	0.78	73.71	0.09	0.96	19.75	4.71
209	AACTTACCAGAATCA	C700T	50.59	5.32	7.16	2.33	32.69	1.91
210	AACTTATTGCACATT	C684T	57	6.03	6.08	1.64	27.36	1.89
211	AACTTATTTGTATAT	WT	59.09	6.13	5.32	1.33	26.22	1.91
212	AACTTCGAAATCATC	A451G,T604G	54.7	11.05	4.01	3.31	25	1.93
213	AACTTCTCTGTCTAA	G75T,G510A,C615G	61.58	5.7	5.82	1.94	23.15	1.81
214	AACTTGATCTTAATA	C77T,T131A,A219T,G297A	0.33	57.72	0.65	0.11	39.13	2.06
215	AACTTGGAAACACGA	A220T,T255A,A368T	52.37	20.08	3.21	1.38	20.46	2.5
216	AAGAAACATTTAATC	G417C	62.02	7.2	6.2	1.99	21.59	1
217	AAGAAATCGCGCATT	T162C,G366A	58.17	11.56	3.78	1.27	20.8	4.43
218	AAGAAATTTCTTATG	T136A,C198A,T225C,C435T	65.75	4.13	4.88	2.49	17.95	4.79
219	AAGAAGTCAATAAGT	T289A,T386A,A408G,G444T,A609T,C627T,C675T,G686A	0.08	84.28	0	0.08	14.92	0.64
220	AAGACACCCAAGCAA	WT	62.93	7.69	5.32	1.67	19.95	2.43
221	AAGACCTATCAACTG	C28T,A213G,A533T	56.49	8.07	5.96	1.41	25.26	2.81
222	AAGACGGGTGGGACT	T153C,A356G,C464A,G574A,C624T,C703A	5.16	74.61	1.9	0.13	12.14	6.05
223	AAGACTGATACATTC	C62T,G128A,A416T,A425G,A477T,T532A,G555C,A578C,T625C	36.94	45.15	2.29	0.26	12.27	3.09
224	AAGACTTCCATAACG	A209G,T655C	60.37	5.62	4.17	2.06	26.37	1.41
225	AAGAGACTTATACAT	A88G,G695A	15.2	2.8	1.6	11.99	67.2	1.2
226	AAGAGAGATGTCGCT	T38C	60.91	6.96	4.05	1.43	24.21	2.44
227	AAGAGCAACTACGTG	WT	61.38	6.06	5.24	1.69	23.13	2.49
228	AAGAGGTGGATACGT	C642T	59.94	5.85	4.99	2.11	25.57	1.54
229	AAGAGTAGCGGGGAT	G381T,T666C	58.38	1.43	2.71	3.68	21.2	12.6
230	AAGAGTATGTATGCG	T170C,T394G,C502T	69.78	10.04	5.5	0.97	13.22	0.5
231	AAGAGTTGTTCTATT	G217A,A513T,C520T,G639A	70.94	6.84	4.64	1.26	14.76	1.55
232	AAGATAAACGTAATA	T39C,T329C,C703A	70.97	1.94	6.13	4.51	14.84	1.61
233	AAGATCCTCAACGGG	C28T,C149A,A385T,G595A,C637A,C700T	52.63	15.88	8.27	1.32	18.11	3.79
234	AAGATCTGGTAGGAA	T173C,T409C,G575A	66.93	6.99	5.91	0.81	13.17	6.19
235	AAGATGCATAGCCAT	C640T	68.58	7.71	3.42	1.72	16.69	1.87
236	AAGATGTTCTTACTT	C312T,G348T,A383G,G395C,C450T,T509C,T557C	48.98	14.1	6.28	1.69	26.16	2.79
237	AAGATTTCGGTCAAC	C41A,A443T,C454T,T638A	8.81	63.93	0.89	0.4	25.27	0.7
238	AAGATTTGTGCATGA	C159T,A252G,G328A	52.52	13.68	4.22	1.22	26.51	1.84
239	AAGCAAACAGGCCCT	C55G,T325C,G449A	38.24	34.91	2.27	1.83	19.73	3.02
240	AAGCAACTTTCAATC	C41G,G215A,T321C,T386G	54.3	3.46	5.49	0.59	35.44	0.72
241	AAGCACGTAGCAAA	A513T	73.38	9.84	3.38	0.95	10.7	1.75
242	AAGCAGAGTTAGTCG	T413A	61.24	9.93	5.02	1.06	21.04	1.7
243	AAGCAGTATGTCCCT	C28A,C124T,A199T,A296T,C320T,T565A	0.23	85.05	0.05	0.09	13.32	1.26
244	AAGCAGTGTTCTCTA	WT	66.46	5.36	1.99	1.07	22.82	2.31
245	AAGCATGCCCGCAGG	C129A,G215C,T303A	66.2	1.6	5.78	0.85	21.39	4.17
246	AAGCATTATAGATCA	G56A,A78G,T302C,A343T,G366T,T413A	52.51	15.01	5.46	1.09	24.57	1.35
247	AAGCGGAAGGAAGTT	T137A,C281A,T325A,C363T,T413A,T516C,C598T,C703T	35.45	18.18	4.85	0.61	34.24	6.68
248	AAGCGGACAGTCTTG	A285G,C662T	41.13	9.67	2.86	1.76	41.55	3.02
249	AAGCGGTCCAGATTA	T42G,A45G,A83T,C158T,A494C,G496T	54.89	5.46	4.16	4.02	26.44	5.03
250	AAGCGTGGCGTGCAT	T186A,G230A,G318T,T325C,T459C,G595A	71.89	1.68	6.35	0.91	15.93	3.24
251	AAGCGTTTTGTAAGA	T195A,T643C	65.44	8.28	5.39	1.01	16.91	2.98
252	AAGCTAATCCAGTC	A268G,C397A,C464G,G664T	76.37	1.5	6.13	1.39	9.72	4.89
253	AAGCTCGCTCACCTG	A141G,T562C,TC586T	66.85	12.8	5.09	0.78	12.01	2.47
254	AAGCTCTTCAGGGAT	C406T,G500T,C514T	71.65	6.3	6.81	0.77	12.45	2
255	AAGCTCTTTATTTCC	A246G,C345A,A485C,T539G,A641G	29.21	27.43	1.77	2.65	38.05	0.89
256	AAGCTTTTCATTATC	C37T,C41A,T136A,A252G,G452A,T586C,C649T	57.29	7.71	4.27	1.07	27.87	1.79
257	AAGGACAGTTTTTTC	T117C,C265T,A285T,G457A,G479A,A506T,A590T,C627T,T632C	3.11	26.28	0.34	17.75	40.45	12.07
258	AAGGAGTGACTGATG	T90A,T173A,G370A	57.35	11.65	3.65	1.52	22.97	2.86
259	AAGGATATATCGTTG	G264C,T465C	70.71	2.76	5.98	1.93	17.79	0.83
260	AAGGCGGATGGACAG	C41T,G331A,G353C,G555T,G569A,T622C,G656A	65.63	0.18	2.38	3.42	11.07	17.31
261	AAGGCGGGGGCAGTA	T136C,A181T,C511T	65.66	5.82	6.87	1.29	18.4	1.95
262	AAGGGCTTAAGTGCG	A26T,T38C,G187A,TA218T,T440C	53.36	5.93	3.95	1.19	34.39	1.18
263	AAGGGTAATCACATA	G233T,T293C,G322A,A694T	13.44	4.84	0.27	6.45	75	0
264	AAGGTAAACAACCCC	T329C,C497A,T643C	78.86	1.1	4.15	3.05	9.04	3.81
265	AAGGTCTACAAGGCT	A156G,G215A,C407T,A535G,A592T	37.66	3.9	2.6	0	53.68	2.16
266	AAGGTCTTTACGATC	A428G	36.17	33.23	2.01	1.08	26.74	0.76
267	AAGGTGAAACGTCGT	T115C	68.65	7.03	3.79	1.5	16.45	2.58
268	AAGGTGGAATGGGAG	TG70T,T562C	65.96	8.44	4.59	1.23	17.03	2.75
269	AAGGTGTCCAAAGTC	C62T,T102A,G113A,A118T,T140C,G230A,A425T,C503A,T504G	5.86	0.44	0.19	15.8	35.68	42.03
270	AAGGTTTATATTAAG	T153C,C157A,A356G	5.99	64.92	2.51	0.11	23.53	2.94
271	AAGTAATATTCACAG	T29A,C478G,G676A	61.24	7.1	4.49	2.07	23.72	1.38
272	AAGTAATCTATTATG	G91A,T117C,A268G,G500A,TG581T,T605C,G614A	73.01	7.94	4.96	0.2	12.1	1.79
273	AAGTACGTATTTAAG	T31A,A78G,C92A,C135T,A456C,A483G,A547T,T631A,G664A	68.66	5.79	5.45	3.24	10.39	6.47
274	AAGTACTAGATGGTG	T122A,C150T,G496A,A506G,T616C	2.33	4.9	0.47	25.41	45.69	21.21
275	AAGTATACATATAGG	A494T,G569C	63.79	6.56	5.03	1.69	21.58	1.34
276	AAGTATCACGGGCTG	T704G	65.73	6.45	5.18	1.51	19.13	1.99
277	AAGTATGACATATTC	T283C,A338T,C398T,C410T,A451T	67.13	2.12	5.3	0.71	19.78	4.96
278	AAGTATTAAATATAT	T293C	63.69	4.19	5.76	2.31	22.43	1.62
279	AAGTCAAAGGCGTTT	A78G,C124A,T126A,T586C,T616C,T701A	60.66	4.41	4.92	1.31	27.24	1.46
280	AAGTCACTATGTTGT	G674A	64.08	6.79	4.52	1.33	21.5	1.77
281	AAGTCAGACCACTGT	T53C,A263T,A451T,C652T,G664A	64.84	5.34	3.26	2.08	22.55	1.93
282	AAGTCAGAGACAGCC	T543A	63.34	5.76	4.62	2.02	22.41	1.86
283	AAGTCAGAGGCCTGG	C64T,AG220A,G328A	53.79	11.62	4.26	1.11	27.62	1.61
284	AAGTCCAACAATTCA	T122C,T420C,CA571C	77.55	6.24	3.17	1.13	8.42	3.49
285	AAGTCCACATTACGT	A47T,G91A,G460T,T628C,A648T,T672A	40.15	18.66	4.11	1.03	35.26	0.78
286	AAGTCCTCGGAGGTC	A246T,T277C,C450T	69.17	3.95	7.66	1.35	14.71	3.16
287	AAGTCCTTATATGCG	A191C,G352T	66.92	1.75	6.09	2.66	21.25	1.33
288	AAGTCGAAACCGAGT	T31G,C530T	66.92	6.12	3.26	2.35	18.75	2.61
289	AAGTCGAATGAATAT	T126C,T173C,T661A,A678G	59.01	5.1	2.84	2.14	28.67	2.25
290	AAGTCGCAGCGCGGA	A365T,C376T	30.94	34.84	3.1	0.61	26.58	3.92
291	AAGTCTCCCAGCAAG	T162C,A181G,G211A,G318T,C512T,G623A,G664A	NA	NA	NA	NA	NA	NA
292	AAGTCTCGCTGCCAA	C158T,A219C,C231G,T241A,C442T	25.47	47.79	2.67	0.95	20.8	2.31
293	AAGTCTTATGTGGCT	C400A	58.87	3.03	5.68	1.47	28.88	2.06
294	AAGTGAAGGAATATT	G276A	74.36	2.66	5.51	2.62	13.65	1.19
295	AAGTGCGCAAAATTA	C64CA,A199T,T548C,A663T,C675T	67.74	8.17	4.39	1.73	15.84	2.13
296	AAGTGGAAAGTGGTT	A45T,T216A,T303C	75.14	0.83	4	2.35	15.6	2.08
297	AAGTGGTCTAAAAAA	C34A,A338T,A408T,T548C,G639A	54.16	12.9	5.74	0.88	21.28	5.04
298	AAGTGTTACTGGATT	C41T,A78G,T108C,T137C,T293A,T335A,C400A	2.21	38.11	1.66	0	46.68	11.34
299	AAGTGTTGCATTGAA	G56A,C85T,A188G,G353A,G357T,G500T,A535G,T536A,C612A,T634C	60.63	0.86	3.45	1.9	32.47	0.69
300	AAGTTAAAGATCAT	G540A,A648G	25.23	0.92	1.1	7.92	63.55	1.28
301	AAGTTACTAGATAAT	WT	59.33	5.85	6.21	1.49	24.82	2.29
302	AAGTTAGTAAGTAAT	C28T,T116C,A219T,T308A,C360A,G370A,A443T	6.69	68.62	0.34	0	23.33	1.02
303	AAGTTATAGGCGACT	T153A,G372A,G585A	63.82	14.74	3.6	1.2	13.34	3.3
304	AAGTTCACTCATTAC	C138T,G599A	60.13	6.8	5.71	1.38	24.02	1.96
305	AAGTTCTTATGATCG	G486A,G501A	58.66	8.09	5.53	1.44	19.71	6.57
306	AAGTTGTCCGCTACT	WT	64.68	6.47	4.17	1.92	20.52	2.23
307	AAGTTTACTTTGATG	C33T,A83G,A105T,T136A,A152T,C231T,T283C,T516A,T562A,G569A,C570T,C665T	1.29	0	0	11.61	76.78	10.32
308	AAGTTTAGCGATTTC	G305A,C571T	70.17	0.53	3.97	3.91	21.05	0.36
309	AAGTTTGCATTGTAG	G104T,T504C	1.94	0.16	0	10.23	78.74	8.93
310	AATAAAAAAAGTACG	T115C,A578G,T699A	66.55	7.59	5.06	1.44	16.73	2.63
311	AATAAAAAACGTTCG	G221A,G353A	76.34	0.78	4.91	2.45	14.09	1.43
312	AATAAAAGGATACAA	WT	62.45	7.2	5.64	1.55	21.78	1.37
313	AATAAACCAAGCATA	G264T,A477G,T661C	71.01	2.14	2.85	4.99	18.29	0.72
314	AATAAAGTTATAGAT	C107A,T162C,G272A,T321C,A447T,T536A,T543C,C630A,A689G	26.92	35.95	1.77	8.02	14.6	12.73
315	AATAAATATTTAAAA	C292A	12.6	44.46	2.81	0.39	37.35	2.38
316	AATAAGCAAAATCTC	A334G,A356G,G574A,G686A	6.86	74.36	2.06	0	12.36	4.36
317	AATAAGGACACTTTC	T117A,G128A,T321A,A383G,A385G,A641G	41.32	29.14	4.72	0.7	22.78	1.34
318	AATAATATTTTTTCA	A26T,A188C,T195C,T386C,G569A	66.1	5.71	5.59	1.33	19.93	1.33
319	AATAATCAGTGATAC	T117C,T186C,C339T,T650C	21.32	37.23	0.9	1.2	36.03	3.31
320	AATAATCCCTACTAG	C34T,T333C	63.9	1.15	7.13	3.45	22.53	1.84
321	AATAATTAGTCACTC	A213T,A252T,A268G,G311A,T386C,A447G,C455T,C511A,A513G,G534C,T699C	21.69	16.93	2.12	0	55.03	4.23
322	AATAATTTGATGTCA	T53A,G72A,T329A,T666C	76.7	2.48	1.75	4.14	13.67	1.25
323	AATAATTTGGTCATC	T491C,T634C	58.38	6.51	2.71	3.52	24.66	4.21
324	AATAATTTGTGCGAT	T126C,T162A,T186C,G258T,G328A,C400T,T666A	66.01	5.91	7.39	0	17.73	2.96
325	AATAATTTTCATCTG	T565C	64.21	6.72	5.07	1.36	20.26	2.38
326	AATACAGTGGTCCGG	A425T,C521T,C522T,T610C	67.97	2.64	4.37	1.82	20.66	2.54
327	AATACATTCGAAATA	G109C,T317A,T420C,A494G	65.07	3.59	5.64	1.61	21.96	2.14
328	AATACCTAAATAGAT	C178G,G192A,A246G,T303C,G353A,C393G,T526A,T696C	NA	NA	NA	NA	NA	NA
329	AATACGAGATATCGA	G211A,C287A,G306C,T351C,G388C,T420C,G569C	1.38	0.55	32.14	0	53.02	12.91
330	AATACGAGCATCAGT	A83G,A246T,G298A,T315C,A560T,T672C,A681G	32.48	25.78	2.23	0.79	35.29	3.43
331	AATACGAGGGCTGCA	C324T,C454T	44.41	25.68	3.63	0.91	22.96	2.41
332	AATACGCAAATTAAT	WT	59.93	6.74	5.34	2.03	23.06	2.9
333	AATACGTCTCGCATT	T195A,T241A,A356G	4.8	70.47	1.5	0	20.04	3.19
334	AATACTACACCACTT	A118G,A147T,T173C,A220G,G318A,T658C	59.04	7.74	4.84	1.61	25.48	1.29
335	AATACTACTCGAACG	G73A,C363A,A385G,G480T	39.88	33.64	1.14	1.14	13.63	10.56
336	AATACTGATGCACAA	G79A,C145G,T498A,T605C	67.85	8.29	3.47	1.5	15.31	3.59
337	AATACTGCATTACTT	WT	60.17	6.18	6.13	1.8	23.66	2.05
338	AATACTTATGGTCTT	G100T,T241C,T509C	60.69	4.08	5.77	2.29	24.77	2.39
339	AATAGAACCAAAATA	WT	64.1	7.07	5.24	1.33	20.59	1.67
340	AATAGGCGAATGACA	G430A,G656A	34.01	23.42	2.25	2.93	36.49	0.91
341	AATAGGGTTAAATCT	C158T,A177T,A682T,T688A,G693A	53.5	6.58	5.76	2.06	31.28	0.82
342	AATAGGTAATAAAAT	A69G,C119A,C404T,C437T,T459C,G651T,A678G	54.46	2.05	1.37	2.74	36.65	2.73
343	AATAGGTACCGCTTT	WT	64.63	6.46	5.27	1.6	20.22	1.81
344	AATAGTACAAAGCTA	C178T,T207C,A209G,G322A,A533C	NA	NA	NA	NA	NA	NA
345	AATAGTACTCCCCAC	WT	64.49	6.08	4.63	1.74	20.82	2.23
346	AATAGTATGCGTATG	A220G,G484T,T628A	56.1	5.2	7.02	3.12	26.23	2.34
347	AATAGTCTATGAATT	WT	60.36	6.11	4.91	1.77	24.88	1.96
348	AATAGTGCCGTATCG	T53C,C61A,G97T,T179A,G210A,A494G,A533T	65.78	8.75	3.8	1.14	16.35	4.18
349	AATATAAAAGTATGT	T70C,T283C,A443G,G538A	5.5	73.77	0.52	0.17	18.48	1.56
350	AATATAATATCCCTG	G244T,G259A,A572C	67.31	3.61	5.25	1.57	20.34	1.92
351	AATATAATTAACTGA	T108A,T162A,G183A,G259A,T347C,G388A,C442T,G623A	39.13	25.47	2.48	1.86	27.33	3.72
352	AATATACTACGTACA	WT	59.97	6.8	5.03	1.81	24.02	2.36
353	AATATAGATGATGTA	A219T,A663T	58.32	5.81	2.9	1.32	28.76	2.89
354	AATATAGCTAACATG	C85A,C121T,C248T,T354A,C530A,G690T,T701A	43.04	0	0	16.52	32.17	8.26
355	AATATAGCTCGCACT	G426T	51.89	10.14	3.56	1.62	22.5	10.27
356	AATATAGTCCCCTAC	G183A,T469A	62.21	18.9	2.36	0.79	14.17	1.56
357	AATATATGGTACTCG	C142A,C248A,A523G,G702T	0.21	0.21	0	13.17	44.87	41.54
358	AATATATTAAGAGCT	G27A,G98T,T102A,A282G,T557A,G606A,T632C	6.53	53.89	2.95	0	31.37	5.27
359	AATATCAATATTAGG	WT	60.8	5.46	5.46	1.51	24.72	2.04
360	AATATCATCTAATTA	A65G,C519T	56.45	4.42	5.43	2.03	29.31	2.37
361	AATATCCTTGAACAG	A285G,G500A,C615T	43.43	24.43	4.25	0.99	25.43	1.47
362	AATATCTTTTAACGT	T249A,C314T,A337C,G370T,G449A,G505A,T543C,C652T	0.75	88.99	0.24	0.06	8.63	1.32
363	AATATGCACGTACGT	T108C,T122C,G470A,G656A	43.98	11.62	3.74	3.31	35.96	1.39
364	AATATTATAAAAGAT	T401C,T429A,A506G,C598T	1.06	2.3	0	18.73	68.2	9.71
365	AATATTATAGGGACT	A96G,T270C,A296T,G319C,G353A,G529A	0.54	46.63	1.51	0.14	49.1	2.07
366	AATATTCCAAACTTC	T516C,G651A	61.13	6.18	3.74	1.68	25.18	2.08
367	AATATTCGGTCTTTT	A232G,G674A	65.56	6.51	5.36	1.24	19.05	2.27
368	AATATTCTTAATAAA	C133T,C393G	54.4	7.43	7.11	1.08	28.54	1.42
369	AATATTCTTTAGGGA	G75A,G210T,C266A,G326A,A368G,C442A,A443G	5.46	53.01	1.1	0	40.44	0
370	AATATTTAATAGGAG	A69G,G331A,T562A,C630T	66.74	0.78	5.17	3.31	22.15	1.85
371	AATATTTGGTGGAA	AC59A,G517A	NA	NA	NA	NA	NA	NA
372	AATCAAACTACCTTG	C33G,C36T,G444A	2.53	85.81	0.28	0.17	10.19	1.02
373	AATCAACCGTGAGAA	C598T,C630T	64.37	6	5.05	1.37	21.14	2.07
374	AATCAAGTTTTAATC	T173C,T321C	73.07	3.01	3.15	2.14	17.14	1.49
375	AATCAATCGTATCAG	G97A,G123A,A194G,A368G,AC462A	61.87	9.21	4	1.56	20.84	2.52
376	AATCAATTAATGTGG	T504C,GC569G,C596A,A648G,T661C,A667T	1.82	0.91	0	16.37	75.91	4.99
377	AATCAATTTTTCTAT	T335A,T562A	51.66	10.9	5.62	1.41	28.29	2.12
378	AATCACCTAACGGAA	T140C	61.36	6.27	4.76	1.68	23.84	2.08
379	AATCACTTAACGTCG	T270A	69.57	4.45	4.13	1.67	18.82	1.36
380	AATCAGAAATCGTAT	T491A	66.31	4	5.31	1.62	20.69	2.06
381	AATCAGTGAACAAAT	C143A,G244A,TC586T,T650C	73.02	3.82	1.42	1.95	16.77	3.02
382	AATCATAATTTAAAG	G113A,C612T	68.95	3.65	4.11	1.37	19.63	2.29
383	AATCATTGAGTTTGT	A224G,T249G,T601A	60.4	7.77	4.75	1.88	23.57	1.63
384	AATCCATTCATATAT	T116A,A147G,G322T,C503G,T620G,A667G	12.83	8.06	1.16	5.92	59.54	12.49
385	AATCCATTCCCGCGT	T102C,C142G,T562A,G606A	64.07	4.64	4.19	2.25	22.75	2.1
386	AATCCGCGACTATTA	G260A,G370T,A408T,T613C	19.82	48.54	0.29	1.47	26.04	3.83
387	AATCCGCGTTCAGTA	WT	67.09	6.16	5.09	1.59	18.1	1.97
388	AATCCGTATATAATT	T130A,G272A,G340A,A592T,G614A,A694G	24.21	0	0.31	33.96	40.88	0.63
389	AATCCTCAAATATAT	A188G,A358T,T516A,G566A	0.97	0.32	0.32	8.11	80.56	9.72
390	AATCCTCCACCTTCC	G534A	69.4	5.27	2.79	1.82	18.41	2.31
391	AATCCTCCAGCTGA	A78G,G569A	70.52	8.29	2.83	1.36	14.83	2.17
392	AATCCTTATCCCCAA	C55A,G510A	65.81	4.83	6.17	2.13	20.51	0.55
393	AATCCTTGTCTCTAC	C125A,G402T,T498C,C662T	29.2	2.5	1.41	3.91	61.23	1.75
394	AATCGACTTTATTTC	A105T,A160T,G230A	54.25	5.76	7.67	1.64	27.12	3.56
395	AATCGATGATACTAT	A365T,A438G,G564A	48.11	22.74	4.52	0.91	20.57	3.14
396	AATCGCCATTTAAGT	G95T,C149A,A182T,A203G,G228T,T409A,C665T	47.77	6.37	2.55	2.55	38.85	1.91
397	AATCGCTTCATGGAA	C364A,C397G,GC517G,T625G,G635T	47.93	1.01	1.52	8.34	34.96	6.24
398	AATCGGACGATGCCA	AC59A,C93T,T131A,A167T,T321A,G353A,C398T,C530A,A542G,C570T,A590G,G617T	10.21	0.45	0.22	35.85	50.27	3
399	AATCGTAATAATACT	A226T,A232G,G272A,C287A,G531A,T565C	78.58	0.31	5.58	4.59	8.92	2.02
400	AATCGTACATTTTAA	G91T,C287A,G554T,G568A,C687T	51.18	2.17	4.01	2.78	26.47	13.39
401	AATCGTCATTCGACC	C164T,G196C,T586G,T631C	69.9	5.48	2.95	2.19	18.1	1.37
402	AATCGTTCAATATAA	C36G,T102C,A224G,C467T	27.91	43.06	4.03	1.26	22.09	1.65
403	AATCTAAGATGGGGG	A44G,A65T,T117G,A263G,T389C,C410A,C418G,G599T,T616C,T620A,C640T,C668G	67.81	11.12	0.52	2.59	12.67	5.3
404	AATCTAATAGGATGG	WT	59.87	6	4.46	1.39	26.46	1.82
405	AATCTACTTAGCCTT	A82G,T130C,C139T,T270A,A337G,T361A,C453G,T469C,A533G,G633A,G670A	52.37	22.28	2.37	1.64	20.64	0.7
406	AATCTAGCACTCGGA	A47T	57.97	6.53	5.38	1.85	26.56	1.71
407	AATCTAGTAATTTAA	G80T	62.11	5.55	4.55	2.29	23.39	2.11
408	AATCTATTTAGCATA	T173C	57.47	5.41	5.47	1.9	26.86	2.88
409	AATCTCATACGCGTA	A285G,G377A	63.14	6.7	4.38	1.03	23.2	1.55
410	AATCTGACTGTTTGA	G636A	59.34	8.87	6.47	1.45	21.29	2.57
411	AATCTTATCTTACTA	C85A,A120G	56.58	6.52	5.67	1.17	28.45	1.6
412	AATCTTATTACCCTA	T241C,A456T,T622A	60.05	6.02	4.69	2.46	24.78	2
413	AATCTTATTTCCTAG	T545A	57.32	8.63	6.69	1.02	24.74	1.59
414	AATCTTCAACAAGTG	G313A,G457T,A494G,T548C	46.93	18.75	6.25	0.44	24.34	3.29
415	AATCTTCCGAAGCTC	T516C,A523T,G599T	0.32	0.11	0.11	5.75	27.12	66.59
416	AATCTTCTAATTAAT	T90C,G346A	67.9	3.54	3.44	2.27	20.54	2.3
417	AATCTTGTTCAAACA	A78T,T162C,A166G,G417A	69.63	6.03	4.16	1.9	16.9	1.37
418	AATGAATGTCAAGTT	T140G,A194G,G229T,C339T,G362A,CT468C,T553A,T638A,T650C	4.05	42.33	0.63	0.13	50.95	1.91
419	AATGACAGGTGCCAT	G75A,A120G,T389C,C642T	69.25	2.27	4.73	1.04	21.76	0.94
420	AATGACGCAGCTTGT	A88T,C324T,T553A,C577T,T616C,G647A	31.56	4.61	1.42	4.61	56.38	1.42
421	AATGAGAGCGCGGGG	T335C,T632C	69.56	4.57	5.65	1.08	17.18	1.96
422	AATGATATCGTCATG	G595T	62.91	7.78	5.16	1.46	20.9	1.78
423	AATGATGCATCTAGT	T315A,C503A,C518T,T526C,C612A	15.67	3.09	0	10.31	64.32	6.61
424	AATGCACCTAAATTT	G484C,C637T,C654T,G674A,A681G	59.09	5.53	4.09	2.89	26.24	2.17
425	AATGCATTTTTAACT	C41T	57.41	6.66	5.21	1.66	27.46	1.59
426	AATGCCGCCATGGGT	C36T,T672C	71.24	10.73	4.32	1.26	9.58	2.88
427	AATGCCTTCTAATGG	A188T,C312A,C468T,G544A,T643A,T650A	53.26	5.88	4.25	1.96	33.01	1.64
428	AATGCGAATACATAT	T401C,G414A,T610C,G691A	5.47	0.5	0	17.91	75.62	0.5
429	AATGCGGCTAAATGA	C175T,C466T	47.15	10.45	4.18	1.8	28.95	7.47
430	AATGCGGGGGGCGCA	T137C,C154A,A171G,T392C,A473T,T553C,T621C,T672C,T697C	74.83	4.75	2.22	1.74	15.51	0.96
431	AATGCTTGAGATGAT	A203T,C698T	64.77	6.03	5.05	1.6	20.79	1.76
432	AATGGAAATGTCAAT	G644A,C675G	64.02	5.95	3.8	1.78	21.11	3.35
433	AATGGAGGATTTACA	A105G,A246T	62.66	6.22	5.22	1.6	22.9	1.4
434	AATGGGCGAGTTAAT	G113A,A560G,A681G	20.19	0	0.37	19.45	28.8	31.19
435	AATGGGGCTATAACT	C107A,C612A,T620C	59.86	6.69	4.88	2.62	23.78	2.16
436	AATGGGTGGGGGTTG	T173G,T394C	73.1	2.19	6.49	1.62	15.23	1.37
437	AATGGTACGGGAGCT	G391A,T504C,T539C,T605A	1.63	0	0.2	10.82	74.9	12.44
438	AATGGTATTTATGCT	T126C,G357A	54.23	9.95	5.39	1.5	27.03	1.9
439	AATGGTCAAGACAGT	C60G,T116G,A118G,T131A,G183T,A578T,C589T,T613A	66.56	2.87	6.21	2.23	18.95	3.19
440	AATGGTCCTGACCCA	G353A	85.61	0.36	2.46	1.59	8.54	1.44
441	AATGGTTTATTCCGT	A44T,G49C,A69G,T140A,T341C,G362A,A383G,G569A	64.88	5.93	5.48	1.48	20.74	1.49
442	AATGTAAGAGACCTA	G99T,T206A,A251T,G258A,G350A,A368G,A425G,G651A,T669C,A678T,A682T	71.4	0.8	3.1	3.7	19.03	1.98
443	AATGTACATGGAGCT	G99T,A213T,T225C,T283A,T291C,T317C	0.79	25.4	8.73	0	54.77	10.31
444	AATGTAGCACTTCG	G564A	69.99	10.6	3.71	1.01	11.01	3.68
445	AATGTCCCAATCACC	A65G,C552G,C675T	67.23	6	4.43	1.34	19.65	1.34
446	AATGTCCCTGTGCAT	C55T	58.38	6.45	4.52	1.61	26.13	2.91
447	AATGTCTCTATGGCA	C41A,A45G,A213T,T303A,C434T,C520A	NA	NA	NA	NA	NA	NA
448	AATGTGCTACATCTA	A47G,A182G,C497G,C618T	48.96	4.75	3.71	9.05	26.41	7.12
449	AATGTGTGTCTGCTA	G73A,GA100G,T225A,C369T,A523T,G677A	0.71	0.14	0	5.37	30.4	63.39
450	AATGTTACATTAAAC	TG111T,A181G,T516C,C624T,T704C	65.31	7.43	5.18	1.8	17.79	2.49
451	AATGTTCCGACATCA	WT	67.61	6.25	4.44	1.49	18.39	1.81
452	AATGTTCCGGATTAA	A323G	35.16	21.88	4.3	0.78	35.16	2.72
453	AATGTTGCAGGCGAT	A253C,A358G	4.52	74.08	0.67	0.1	18.05	2.58
454	AATTAAAACAATCGC	AC59A,G73A,A191T,A199G,G319A	65.65	4.09	5.43	1.63	21.19	2
455	AATTAAAATTGCCCA	G313T,G644A	33.73	27.45	4.6	0.97	30.25	3.01
456	AATTAAATTCCAAA	TG102T	68.81	8.06	3.35	1.5	16.05	2.23
457	AATTAACCAGCTTCG	T195C	64.96	6.6	5.2	1.15	20.21	1.87
458	AATTAAGCATCTAAC	T31G	56.03	7.1	4.81	1.34	28.97	1.75
459	AATTAATAATGTGTG	G104A,C169A,T249C,G305A,G362A,C369T,T553A,T660A	60.09	2.13	3.51	2.76	30.48	1.03
460	AATTAATTCGAAAAA	T50C,A203G,T249C,A578G	56.28	10.03	6.05	1.48	23.86	2.3
461	AATTACATACCATCC	WT	62.15	5.86	3.15	2.93	25	0.92
462	AATTACCAAAAACCG	C41T,T140C,C197T,A682G	NA	NA	NA	NA	NA	NA
463	AATTACCCAATCAGA	C61T,A365T,C514T,G679T	56.86	26.33	3.83	0.62	10.02	2.35
464	AATTACCTGCATACG	A492T,T601C	54.98	4.57	4.68	3.15	30.88	1.75
465	AATTACGTCAGATCG	C125A,T386C	65.32	2.69	6.43	1.79	21.08	2.69
466	AATTAGAAGCAGCAC	C155A,G217A,G322A,C434T,G510A	32	26.28	3.65	0.85	26.16	11.07
467	AATTAGGCAATCCTT	T666A	58.91	7.31	5.02	1.26	24.77	2.73
468	AATTATGTGGTGTGG	T274A,G319A,G346C	69.57	4.87	3.34	2.14	17.94	2.14
469	AATTATTTCTTGCGT	T140A,G346A,G387A,T413A	45.32	18.55	4.19	1.45	28.39	2.09
470	AATTCACATTGTACA	T136C,C411A,T632C,A689T	76.75	1.63	5.25	1.75	13.22	1.4
471	AATTCACGGCGCAAT	C404A	68.22	2.54	5.63	1.54	19.65	2.42
472	AATTCACTGCGTTTT	A202T	59.74	5.43	5.43	0.94	26.97	1.49
473	AATTCATCGGAAGTT	G243T,G346T	65.97	2.77	6.72	1.5	21.52	1.51
474	AATTCCCCTAGACGG	G217A,T308C,C497T	65.41	0.94	2.93	10.28	16.72	3.72
475	AATTCCGCAGTGTCT	C129T,G189T,T351A,T361C	78.73	1.31	4.13	1.83	12.86	1.13
476	AATTCGAGTAAACCT	C33T,G227A,T329A,A338G,G388A,A438G,C591A	52.84	4.55	4.02	2.19	30.36	6.04
477	AATTCGTAAAGTGTA	G426T,G555A,C665A	46.72	12.58	4.88	0.95	22.9	11.97
478	AATTCGTTAGTGTCG	A365G,G448A,G510A,G683A,T704C	76.02	1.1	7.07	1.4	12.81	1.6
479	AATTCTAGTGGTATG	A282T,G319T,A338T,T354A,A385G,G391C,G426T	45.95	10.04	5.21	1.86	26.99	9.95
480	AATTCTTCAAATTAA	A268T,T386C,T419A,G472A	60	0.26	6.75	2.34	28.57	2.08
481	AATTCTTTTCAAACT	T122A,C159T,G318T,G366A,C412T,A549G	55.03	5.68	3.5	1.75	31.88	2.17
482	AATTCTTTTCTGGCA	A188G,A251T,C570T	48.77	4.41	2.48	2.48	40.77	1.09
483	AATTGAATCTTAGTT	WT	59.87	6.85	5.35	2.16	23.31	2.46
484	AATTGACGTTATTAT	WT	63.27	5.06	4.92	1.57	22.97	2.2
485	AATTGACTTAATAGC	A78T,C110T,C144G,G306A,G471T,C520A	67.23	0.55	2.03	9.79	18.65	1.74
486	AATTGAGTTTCAACC	WT	64.96	6.24	4.33	1.82	20.34	2.31
487	AATTGCATCTTTGAT	A59T,T179C,G362C,G554A	6.41	3.53	0.56	4.18	35.93	49.39
488	AATTGCATTTTACCA	A301G	58.97	7.96	4.49	1.45	24.81	2.32
489	AATTGGACAACGCTT	TG581T,C700G	67.78	9.17	3.59	1.19	15.99	2.27
490	AATTGGCGAAGTCAC	A191T,T351A,T613C,G617A	73.32	0.91	4.6	2.91	17.1	1.15
491	AATTGGGATAATGCC	A220T,TG469T,T601A,T643C	49.31	13.71	2.77	2.93	27.58	3.69
492	AATTGGGGTGACAAT	T48A,G639A	55.54	9.92	7.19	1.73	21.57	4.05
493	AATTGGTCTAAGTTA	WT	58.99	7.05	4.97	2.25	24.84	1.9
494	AATTGTTAACAATTA	G196A,C278T,G346C,G414T,A451T,A513G,T643A,T697C	69.19	3.14	2.47	3.53	18.74	2.92
495	AATTTACCACTTGCA	A69T,G242T	64.81	4.72	4.3	1.05	23.59	1.53
496	AATTTACGCCCGGTG	A156G,G192T,A232G,T660C	71.58	3.28	3.55	2.46	17.9	1.23
497	AATTTGAAATATGCA	A181T,A334G,T605C	59.69	6.77	4.19	1.61	27.1	0.64
498	AATTTGACAAATAGG	G109A,T115C,C403T	62.44	3.38	6.14	1.43	23.13	3.48
499	AATTTGGGTACACTC	T74A,G381T,C627T,T643C	54.22	3.51	4.49	1.12	15.87	20.78
500	AATTTGGGTGTGGAT	A82T,T440C	69.68	4.75	3.87	1.53	17.99	2.18
501	AATTTTAGGCGCGTA	T48A,G112A,A156G,G381T,T516C,G531A,G554A	1.71	0.09	0	4	27.51	66.69
502	AATTTTATTCATAAC	C34A,A226T,T446C,T643C	0.19	83.59	0	0	15.45	0.77
503	AATTTTCATGGATTT	T390C	74.26	1.73	5.47	1.73	15.22	1.58
504	AATTTTCCTTTATCT	WT	60.94	6.58	5.21	1.59	23.76	1.92
505	AATTTTCGTGTTGGG	G676T	62	4.48	2.93	2.93	26.52	1.15
506	AATTTTTAACAACAA	A383T,C546T	40.59	16.34	3.96	3.47	27.72	7.93
507	ACAAAATGAGTGTTG	A166T,G387T,G585T,C612A	53.68	6.63	5.41	1.23	29.59	3.46
508	ACAAACGTATATAGC	G106A,C154G,T701A	58.59	7.53	3.97	1.91	25.98	2.01
509	ACAAAGCTTTCCATC	A365T,T509A,G575A,A590G	49.25	13.13	5.22	1.64	24.78	5.98
510	ACAAATAATTGCTGA	G32A,A160T,C393A,T401C,A473T,C518T,T550A	59.81	10.62	4.62	0.92	22.86	1.17
511	ACAACATAATGAATT	AC59A,C143A,AC147A	69.2	7.1	3.38	1.45	16.87	1.99
512	ACAACATTCTGCCCT	C522T	66.66	5.85	6.37	2.26	17.63	1.22
513	ACAACCTGCAAAGCC	T394C,G629T,A641G	75.69	2.64	4.09	1.84	14.74	1
514	ACAACGTCTTTATTC	WT	64.52	5.85	4.62	1.72	20.93	2.37
515	ACAACTATATGACAT	G387T,G460T,C520A,G644T,C649T	42.35	16	1.88	1.18	33.18	5.42
516	ACAACTTTCAAAAGT	CA77C,G180A,A416T,A443G,A456T,G488A,C698T	4.59	72.11	0.55	0.18	21.47	1.1
517	ACAAGACAGTCCGTT	G378A	73.01	2.15	3.54	1.87	16.26	3.17
518	ACAAGACTGGCCACT	T102A,A182C,T308A,G340A,A356T,G579A,T704G	35.69	15.58	3.68	0.85	42.21	1.98
519	ACAAGAGATGTCTGG	T179A,T280A,G510A,A558T,T704A	18.4	43.75	5.9	0.35	27.78	3.81
520	ACAAGTCATCATTTA	WT	57.11	6.44	5.34	1.56	26.89	2.66
521	ACAAGTCTCTTCCGT	T74C,G183T,G297A,T329G,G452T,T601C,T613C,G639A	0.19	89.22	0.19	0	9.83	0.57
522	ACAAGTGAGGTTATT	C37A,G49A,C434T,C463G,G529A,T581A,C588T,A694G	45.78	3.25	1	3.56	42.76	3.65
523	ACAAGTTTATTAACG	C273A	70.9	2.19	4.34	2.82	18.47	1.28
524	ACAATACCAAAGGGT	C40A,T173C,C619A,C630A,T634C	54.64	9.5	7.36	1.66	24.94	1.9
525	ACAATATCTAGATTC	T469A	48.93	13.65	4.42	1.78	29.18	2.04
526	ACAATGTGAATAGAA	T249C,C512T	66.7	8.5	5.62	0.97	16.35	1.85
527	ACAATGTGCTATCCA	C144A,A188T,T289C,G353A,GC433G,C518T,G568A,T605A,G673T,G679A,G690A	61.66	4.62	0.38	5.78	26.78	0.77
528	ACACAATTACATAAC	T351A,C454T,A578T,A592G,T661A,G676T	63.41	1.66	3.72	4.88	25.29	1.03
529	ACACACCCAGTGAGC	C185T,A533C,C612T	NA	NA	NA	NA	NA	NA
530	ACACCATAATTCCTC	A483G	72.76	4.26	5.72	1.94	13.55	1.77
531	ACACCATTGGATCTT	T277A,T392A,C434T	40.44	12.14	4.39	0.65	28.04	14.35
532	ACACCCACGGACCGT	G97A,T465C,A533G,G559T,C662T	56.55	5.91	3.55	3.28	27.82	2.9
533	ACACCGTGAAATTCG	A166G,C482A	77.18	6.48	3.34	1.08	8.15	3.77
534	ACACCTGGGAATTAT	A88T,C121T,C703A	56.21	5.06	6.57	1.72	28.13	2.31
535	ACACGCATAGGTAAC	G172A,T581A,A663T,C703T	61.04	7.74	5.24	1.85	22.12	2
536	ACACGTAAAAATTGT	C344T,GC575G,G599A,T643A	62.13	6.39	1.87	2.8	21.33	5.47
537	ACACGTCAATCTATG	A368C,G426T,T701A	41.63	19.35	3.8	0.89	24.44	9.89
538	ACACTAACCGATAGT	G319A,A383C	67.38	4.48	4.09	2.07	20.29	1.68
539	ACAGAAACCAACCAG	C423T,C497A,C511T,A572C	59.16	21.28	4.11	0.8	10.66	3.99
540	ACAGAGACGTGAGAG	A65T,A385G,C450A	67.4	5.44	5.3	1.87	17.42	2.57
541	ACAGAGAGGTTATGG	T361A	55.78	14.32	3.92	2.09	20.4	3.49
542	ACAGAGGCTAAACAT	A220G,C320T,C324T,T429C	17.85	58.56	1.48	0.22	16.7	5.19
543	ACAGATATGCTACTT	WT	62.23	6.99	4.3	1.2	23.78	1.5
544	ACAGCAAGTGATATC	G377A	69.2	2.5	4.49	1.7	19.93	2.17
545	ACAGCACGAGGTTTG	A285G,A334G,A477G,T586C	55.9	16.22	5.09	1.28	18	3.49
546	ACAGCAGTGACTTAA	T195A,C261T,T469C,G686A	63.25	10.69	4.7	1.71	18.66	0.99
547	ACAGCTCATCAGATC	C157T,C437T,A533T,T660A	67.54	8.95	3.33	1.44	15.08	3.66
548	ACAGGATGCCTGAGG	A82G,G106A,C320T,GT388G,G479A,G599A,T634A,G651A,T688C	23.44	36.56	2.8	0.76	34.9	1.53
549	ACAGGGTGTGATTCA	AC59A	60.03	6.56	5.38	1.57	24.09	2.36
550	ACAGTAACGGCGTCA	T90C,T126A,T419A,G452A,G460T	64.66	7.59	3.06	2.09	21.29	1.31
551	ACAGTACTCTTTCTT	A296G	0.34	89.86	0	0	9.46	0.34
552	ACAGTCGTCATCGAT	T130C	74.1	6.05	3.23	1.45	13.21	1.95
553	ACAGTGACATGGCTT	C135T,T212C,G366A,T374C,T389C	12.12	2.52	6.56	0.5	75.76	2.53
554	ACAGTGGTAACAGAA	C399T,T439A,G529T	68.73	7.1	3.99	0.9	15.19	4.09
555	ACAGTTAATCCGAGT	A181T,GA245G,G387A	27.74	29.05	2.42	0.56	37.79	2.43
556	ACATAAACAAGCCGA	A105T,A166G,C197T	66.07	7.97	5.06	1.19	18.3	1.41
557	ACATAAATTATAATA	A88T,T130A,A371T,T392A	48	9.5	5.08	2.38	27.75	7.28
558	ACATAACCTAACACC	G75A,A232T	63.18	5.98	5.72	1.76	20.95	2.4
559	ACATAGGCAGCGGAA	C178G,C567T	69.93	6.29	1.4	1.4	19.58	1.4
560	ACATATAAGGCCATT	A202G,G228A	43.68	13.39	4.93	1.1	34.57	2.31
561	ACATATACAACTCTT	T432A,TG469T,T604A	61.25	1.71	4.62	3.01	26.91	2.5
562	ACATATGCGTGTCCA	WT	63.53	5.78	4.4	1.79	22.36	2.14
563	ACATATTTTTGGTTT	G104A,T289C,T498A	14.84	43.28	1.95	0.26	37.28	2.39
564	ACATCACTCGGGGTA	G574A	66	8.11	6.08	1.16	15	3.64
565	ACATCATGAGCAATT	T115C,C273T	71.04	4.33	3.77	2.1	16.88	1.88
566	ACATCCTACGCGAT	A118G,GC422G,G691A	NA	NA	NA	NA	NA	NA
567	ACATCTTAAGGAAAT	C64T,T361G,G387T,A533G,G664A	50.34	13.91	7.28	1.32	17.88	9.26
568	ACATCTTTACGTTAT	G310A,G647A,C700A	70.34	0.66	5.4	3.37	18.95	1.28
569	ACATGACAAATTCTC	C155G,CT603C	69.48	10.15	3.4	1.02	12.62	3.34
570	ACATGAGGTGTTCAT	C320G,A416G,C612A,T622A	3.86	66.19	1.12	0.32	26.42	2.08
571	ACATGATATACTTAT	A78T,C367CA,T634A,T650A	64.93	2.66	6.12	2.14	21.69	2.45
572	ACATGTTTGGCGTCT	A120G,G537C	65	7.44	4.78	1.5	19.82	1.46
573	ACATTAAGAACTTTG	C453T	57.51	8.61	4.48	1.86	24.83	2.71
574	ACATTAGGACGAAAA	C94T,A166G,T186C,A252G,A296G,T308A,T528A,C588T,A592T,C646T,T701G	0.83	25.62	0.83	0	48.76	23.96
575	ACATTATCAATGAGT	WT	64.41	4.79	4.88	1.51	21.74	2.66
576	ACATTCATGGACAAA	C28T,A171T,C519T,A641T,T643A	64.29	3.54	4.14	2.67	22.53	2.83
577	ACATTCGGTAAATC	WT	68.95	9.08	3.17	1.79	14.36	2.66
578	ACATTGCTCTAAGCG	T672A	61.45	7.22	5.9	1.66	21.8	1.96
579	ACCAAATAATAGCTG	G100T,G471A,A477T	40.77	21.71	2.65	1.91	31.78	1.18
580	ACCAATACTGCGGTT	A535T	58.4	4.96	2.05	2.8	29.63	2.17
581	ACCAATCATGCCCCT	G187A,G233T,G362A,C530G,T605C	32.34	3.53	1.63	6.8	44.29	11.41
582	ACCACAAATGTTCTT	A219G,A492G,A580T	56.78	4.61	3.76	3.97	27.31	3.56
583	ACCACGATACGCACG	G87T,A236G,A513G,T586A	57.1	10.42	6.5	1.21	19.15	5.62
584	ACCACGTAGAAGTAG	A160G	74.76	7.83	3.08	1.37	10.25	2.71
585	ACCACGTGTGGTCAA	WT	65.08	6.19	4.65	1.3	20.41	2.37
586	ACCACTCCGCTTTGG	A65T,T174C,A371T,G391A,C630T	45.19	18.87	5.42	1.52	26.74	2.27
587	ACCAGAATTAGCAAT	A101G,G180T	51.93	5.77	5.38	2.31	33.09	1.52
588	ACCAGATGTATGACC	WT	67.67	6.18	5.46	1.13	17.3	2.26
589	ACCAGTCACAGACAA	T509C	63.57	6.45	4.96	2.13	19.99	2.9
590	ACCAGTGCCTATGGT	WT	61.05	6.27	4.58	1.72	23.86	2.52
591	ACCAGTTAATACTTA	T401A,G584T	66.9	5.62	6.49	0.87	18.76	1.36
592	ACCATATTCATAAAG	T283C,T539C	54.13	7.39	8.74	0.64	26.11	2.99
593	ACCATCCGTTATTAC	A177G,AG443A	0.3	82.88	0.15	0.15	16.07	0.45
594	ACCATTAATGGTCTT	T162A,A451T	65.93	4.65	5.37	1.65	20.02	2.38
595	ACCATTGAATCAACC	T115C,G221C,T504C,T539C,A542G	5.34	1.53	0	16.03	67.17	9.92
596	ACCATTTTTTACGTA	WT	61.63	6.76	4.83	2.17	23.41	1.2
597	ACCCAATTTTAGGGG	A202G,A648T,A682T	63.2	6.24	5.29	1.54	21.48	2.24
598	ACCCAGACGTTATTT	WT	65.98	4.34	4.72	1.55	20.89	2.52
599	ACCCATAATACATTT	T48A,A285G,T289A,T390C,A485T,T528C,A560G,G563A,C596T,G679T	3.7	0.41	0	3.7	86	6.17
600	ACCCCACGCGAACCG	A101G,G445A,G448T	0.6	82.36	0	0.09	13.76	3.19
601	ACCCCCACCTCAGTC	G366A	61.77	7.95	5.48	1.06	20.26	3.48
602	ACCCCGCTGATAAGT	WT	65.27	6.35	5.18	1.11	19.83	2.26
603	ACCCGACAGTATGTT	C324T,C654A	52.07	14.71	4.86	1.18	23.9	3.28
604	ACCCGGCTAACTCAT	WT	28.15	1.63	46.21	0.4	22.12	1.48
605	ACCCGGTCGGTAGGC	AC141A,A296G,T621A,G686C	0.3	86.03	0.07	0	13.01	0.59
606	ACCCGGTCTCCGCTG	T86C,T374C,A685T	51.47	15.01	5.33	1.26	24.4	2.52
607	ACCCGTAATTGCCAT	C148T,T195G,A251T,G359A,T604A,C665T	53.31	7.09	3.23	2	32.67	1.69
608	ACCCGTATTTCGGTT	A101G,T137A,T325C,C336T,G606A,T697G	52.42	15.32	2.15	0.94	26.62	2.54
609	ACCCGTCAGGGGTTA	T274C,G318T,G402T,A492G,TG536T	72.45	3.22	3.38	2.98	14.52	3.46
610	ACCCTATTATCTTCA	T74C,C94A,C403A,C627T,A663T	68.48	3.8	3.8	2.49	19.61	1.82
611	ACCCTCACGAGTAAA	C360T,A494G,C649T,G680A,T688A	43.75	17.09	5	1.19	31.12	1.85
612	ACCCTCAGATGTTCG	A443G	5.37	86.49	0.05	0.05	7.14	0.9
613	ACCCTCTTGATCAAA	G73A,T608C	69.73	6.56	3.66	1.65	16.06	2.33
614	ACCGATCGTCATGGA	A252G,T274C,C407T,T516C,G531A,G670T	54.62	22.01	1.3	1.14	15.65	5.28
615	ACCGCCTTAAGCGTC	T39C,G76T,C198T,G449A,G481T,A483T,G501A,C519T	7.73	38.8	0.46	0.62	38.03	14.36
616	ACCGGAATTTTATAT	A181T,A338G,A356G,G387A,G584T	1.33	85.46	0.33	0.08	9.65	3.15
617	ACCGGATTATCCTAT	G27A,C367T,T401A,C476G,T604A,T688A	52.23	7.87	6.41	1.31	30.52	1.66
618	ACCGGGACCAAAAGT	C511T	70.84	7.29	6.04	1.02	13.11	1.7
619	ACCGGTTGACAGGTA	A105G,C144T,A220C,G272A	78.62	0.9	5.88	3.16	10.48	0.96
620	ACCGTACAACATTAC	A219G,T354A,A462T,T516C,G537T,C627A	67.6	2.28	4.3	3.57	16.38	5.86
621	ACCGTGAACATATCC	A83G,T200A,T308C,A443T,C502T	33.81	54.66	1.63	0.74	8.94	0.21
622	ACCGTGATTTAATTT	G235A,T240A,C273G,C314A	36.81	23.11	5.63	1.01	29.57	3.86
623	ACCGTGCATTTATAA	T84C	55.96	7.96	6.34	1.88	25.03	2.83
624	ACCGTGTGTTGCCG	T42A,TA218T,C458T,A590T,C615T,T669A,T704G	63.78	5.39	0.96	2.31	26.2	1.36
625	ACCGTGTTACTATAC	G377A,A425C,T536C,TC586T	74.49	3.93	3.08	1.8	13.92	2.77
626	ACCGTTAGGGCGACG	G417T,T621C	72.41	5.16	3.52	1.82	15.32	1.76
627	ACCTACCTCTTTAAG	A594T,A682G	43.67	5.55	4.11	4.21	40.8	1.65
628	ACCTATATGAGAGAC	G234A,G264A,A475G,G488A	63.59	6.58	4.39	0.88	17.11	7.46
629	ACCTATCGTTTAAGC	G35T,TG50T,G58A,A69G,A83G,C144T,T195A	47.99	6.28	7.5	1.4	35.78	1.04
630	ACCTCAGCAAAGCAG	C93T,G346T,G380A,C454G	68.82	4.71	3.92	2.15	15.69	4.71
631	ACCTCAGGGGGAGAT	T38C,T218A,G227A,T241C,A416C,C521T,A560T,C600T,T688C	40.31	22.55	4.29	1.02	29.39	2.45
632	ACCTCGAATTGACCA	C146A,G306A,C369G,T401A,G460T,G537T,T632C,C684A	72.37	0.15	6.34	5.89	11.48	3.77
633	ACCTCGGCGGGACGC	G332A,T392C,G606A	77.65	0.23	3.84	6.11	11.76	0.41
634	ACCTCTAAGGGCCCA	A358G,C399A,C497G,T562C	5.56	57.49	0.28	0.56	30.27	5.84
635	ACCTCTATAATATTT	T116C	61.43	5.7	5.59	2.01	23.1	2.17
636	ACCTCTGACGGCTGG	G76T,A253T,G355A,T459C,C493A,T605C	55.1	19.91	3.02	1.89	19.15	0.93
637	ACCTCTGTTTCGAAA	C144T,T212A,A232G,C520T	1.85	0	15.74	1.85	79.63	0.93
638	ACCTCTTGGACATTC	C175G,T218A,G318T	76.57	1.56	2.08	2.08	15.62	2.09
639	ACCTCTTTGTCTACC	C77T,C143A,T539C	64.38	7.36	5.5	2.2	18.53	2.02
640	ACCTGAAAAAGGAAC	T392C,C551T,G639A,G686T,G690T	69.42	3.22	2.01	5.75	16.11	3.49
641	ACCTGGCAGCGTGAG	WT	64.06	5.87	4.19	1.37	22.27	2.23
642	ACCTGTCACCCGTGA	T115C,C404T	66.03	5.51	4.93	1.71	19.48	2.33
643	ACCTTATCCCGGGTT	T321C,T409C	74.31	2.2	4.54	1.71	15.53	1.71
644	ACCTTCACTGCCAGT	G387A,C684T	40.21	18.49	4.83	0.8	32.44	3.22
645	ACCTTGAAGTCTCAC	C94T,G187T,G233A,T446A,T605A,T625A	0.35	55.74	0	0.35	41.8	1.75
646	ACCTTTTATACGCAT	T291A,G297T,A368T,A483C,C515T,A592T	0.29	85.97	0	0	13.14	0.6
647	ACCTTTTCCAGAAGA	WT	64.7	7.08	4.08	1.66	20.37	2.1
648	ACCTTTTGCTCCCAT	G103T,G161C,T170C,C184T,G192T,T225C,C231A,A338T,C434T	56.35	6.35	7.94	0.79	19.84	8.73
649	ACGAACTCAGAAATC	AC147A,T632C,G651A	67.14	7.24	4.44	1.66	16.93	2.59
650	ACGAATAACAACTTA	G128A,A337G,A541T,T616A	58.86	1.13	3.47	3.42	22.91	10.21
651	ACGAATACCAGTCCA	WT	67.03	4.79	4.22	1.77	20.26	1.91
652	ACGACAATGAACTTC	T206A,T207A,G235A,T317C,C490T,G686A	70.94	3.06	5.51	2.27	15.94	2.28
653	ACGACAGGGTCGGGT	T50C,G56C,C155A,C176A,A226G,A263G,T267C,A282G,T321C,A492T,T601C,G639A	13.37	40.1	6.95	1.61	30.48	7.49
654	ACGACCATCCGGATA	C64T,G196A,T225C,A385T	56.66	10.89	4.8	1.39	25.19	1.07
655	ACGACCGGGAATGTT	WT	65.25	5.77	5.29	2.16	19.48	2.04
656	ACGACCGTTGAAACG	T42C,G128A,T291A,C339T,A416G,T465C,G555T	0.44	78.95	0.04	0.08	12.6	7.89
657	ACGACGTGGCAAGAG	C33T,T240C,G328C,A356G,G379A,C437T	52.87	13.25	3.57	1.24	20.8	8.27
658	ACGACTACTCTATTC	C155A,T247A,C396T,C415T	30.13	32.53	2.88	0.96	30.77	2.72
659	ACGACTCTCTAACAC	C143A,A323G	40.94	36.61	3	0.87	14.16	4.41
660	ACGAGACTGCTGGTG	A181G,C375T,T532A,G555T,T643C,T666C,A694C	NA	NA	NA	NA	NA	NA
661	ACGAGGGGTAAAAGG	T116C,T394A	51.01	12.14	5.61	1.58	26.93	2.72
662	ACGAGTTGATGCGGG	A65T,C77T,C185T,T280A,G656T	NA	NA	NA	NA	NA	NA
663	ACGATCGCCGACTGC	CA159C,T212C,G260A	27.22	2.74	9.28	1.69	57.18	1.89
664	ACGATGGGGGGTGCC	G72A,G87A,G99T,T347A,T528C,G686A	73.57	4.71	2.91	1.89	14.23	2.68
665	ACGATTCCACTTTCG	G112A,C158A,G223A,T225A,G276A,G402A,G568T,T613C,T616A	51.52	0.56	7.96	3.41	22.54	14.01
666	ACGATTCGATAATAA	T70C,A156G,C164T,G234A,G387A	27.35	40.93	3.12	0.9	24.77	2.93
667	ACGCAACAGGTAAAG	AG96A,G233A,T249C	51.92	18.85	4.1	1.63	19.4	4.09
668	ACGCACATTTTTGTT	G99T,C405T	75.39	3.1	3.41	1.24	16.25	0.61
669	ACGCAGCATTAAGGT	A236T,A338G,A416G,C571T,G626T,C654G	43.44	10.66	6.56	0.82	38.52	0
670	ACGCATCTAACCCAG	T173C,T696C	58.88	2.69	1.55	4.83	30.5	1.54
671	ACGCCATAGAAGATT	WT	64.26	5.9	4.65	1.53	21.52	2.13
672	ACGCGACGTAACCCA	T31A,T86A,T179A,A506C,C618T,C703G	1.41	22.82	0	11.76	55.77	8.23
673	ACGCGCTATAATATG	C376CG,G422T	44.99	19.65	4.45	1.34	25.07	4.51
674	ACGCGGGTGGAATTA	A506G,G657C	0.61	4.32	0.06	22.83	52.63	19.55
675	ACGCGTACTGGTGTC	G306T,T516C,A572T,C687T	77.85	0.63	3.35	3.98	12.52	1.68
676	ACGCGTCAACCCGTT	T504C,T655C,A682G,G690T	1.86	1.12	0.37	16.36	78.8	1.49
677	ACGCTCCAACCATGC	G391A,A425G	26.69	36.57	2.43	1.13	30.85	2.34
678	ACGCTGGGGGGGTGT	WT	66.81	7.09	4.75	1.01	18.15	2.19
679	ACGCTTGGGGAGAAT	C307T,C415T,A494G,C646T,A689G	5.6	70.47	0.97	0.57	21.51	0.88
680	ACGGACTAGAATAAG	C124T,T140C,C418G,C512T,CA571C,T604A,G651A,G690T	50.24	34.42	0.72	0.36	5.07	9.18
681	ACGGATTTATCTTCA	T621C	68.84	3.81	2.69	1.57	19.51	3.58
682	ACGGATTTCCTGCTG	A147T,T200C,G381T,G417A,GC452G,T469A,A474G,G480C,G538A,G555A,C600A,T666A	20.43	10.44	2.26	1.47	26.63	38.78
683	ACGGATTTTCATCAG	G311T,T351C,C467G	54.19	15.13	3.32	3.61	22.29	1.47
684	ACGGCCCCCAAGACG	T459C,C687T,G690A	56.67	2.5	2.5	4.58	33.33	0.42
685	ACGGCCGTCTGATAA	WT	63.23	6.08	4.53	1.76	22.9	1.5
686	ACGGCTACAACATAT	G80T,A199G,C400T,G647C	62.18	4.43	1.56	6.32	22.68	2.82
687	ACGGGCGATCTTGTA	T283C,C603G,A689T	56.99	7.21	7.76	1.44	23.84	2.76
688	ACGGGGCGTGGGTCC	T200C,A356T,T432C	64.51	7.4	5.34	1.49	18.46	2.8
689	ACGGGTTCCGACGTC	A177G,T277A,C307T,A358G	0.76	83.32	0	0.05	14.89	0.98
690	ACGGTCATAGAACGC	WT	64.97	6.52	5.37	1.75	19.12	2.26
691	ACGGTCGTTAAACCT	C463T,T632C	63.8	4.14	6.03	0.52	23.62	1.88
692	ACGGTGATATGGAAA	A385G	65.59	7.18	4.49	1.12	19.84	1.78
693	ACGGTTTTAGGCAAG	T70C,G328C,A383T,C503A	29.81	4.32	1.65	10.07	41.62	12.53
694	ACGTAAATTAGAAGA	WT	62.56	5.03	5.59	1.12	23.46	2.24
695	ACGTATCATAATCGT	G229A,T543C,T608C	50.8	16.62	4.98	0.42	23.71	3.48
696	ACGTCAAATTAGTTT	T277C,T465A,T545C	49.66	10.09	6.92	1.25	28	4.07
697	ACGTCAGGTTGTTAT	G73C,TG102T,A220G,CG376C,T389A,T420C,T446C,A447T,T543C	0.28	87.54	0	0.28	9.29	2.6
698	ACGTCCAGCCCAGTA	A82G,T207C,T374G,C615A,C624G,C703A	45.87	5.02	4.66	1.08	39.42	3.95
699	ACGTCCAGGTCAATA	A45T	64.97	5.84	5.35	1.3	20.76	1.78
700	ACGTCTAAGTAGCTT	C159A,A282T,G352A,G445A,T498A,T638G,G690A	0	70.05	0.13	0.54	29.15	0.13
701	ACGTCTCGAAGTTTC	A252G,G370A,G448T,A474G	34.46	19.32	2.77	0.78	21.97	20.69
702	ACGTCTCTAGGATTT	C159G,A214T,G242T,T351A	75.08	1.24	3.39	2.06	17.42	0.8
703	ACGTCTTAATAAGTG	T249A,G381T,A523T,C567T	0.93	0.09	0	6.47	30.78	61.73
704	ACGTGAGCACGGGTA	G215A,G607A	47.13	2.68	6.13	1.53	40.23	2.3
705	ACGTGGTAGCCGCTT	WT	65.37	5.76	4.44	1.49	21.21	1.74
706	ACGTGGTGAGCGATA	G342T,T347C	70.64	3.51	3.64	1.75	18.67	1.79
707	ACGTGTCAGCACTGT	T29C,G80C,T293A	0.91	61.02	1.18	0	26.23	10.65
708	ACGTTATCATATATC	T115C,C345T,C400T,A425C,G566T	46.33	20.23	3.93	0.7	22.99	5.81
709	ACGTTATCTCTGGAC	T116A,C143T,T216A,A296G,A338G,C399T,T459A,A483T,T625C	0.33	86.65	0	0	11.56	1.46
710	ACGTTCTCATATATA	T137C,C273G,T704C	55.51	7.93	5.79	1.4	27.15	2.23
711	ACGTTCTTTGTGGTG	A78G,A337T,A371G,T386A,T459C,A541C,T543C,C615A,G645C	21.28	56.95	3	0.18	14.44	4.14
712	ACGTTGCGCAAGATA	AG188A,G702A	57.86	6.76	6.76	0.83	25.46	2.33
713	ACGTTGTGCTCGTTT	G76A,A323G,C400A,G444A,G481C,G484A,GC517G,C646A	0.68	33.85	0	1.2	59.8	4.47
714	ACGTTTAGTCCTAAT	G204T,G322A,A323G,G370A,A383T,A474G,T562C,A597G	6.71	69.63	1.61	0.08	15.83	6.14
715	ACGTTTGTCTAAGAA	T130A,T174C,T386C,G388C,T643C	66.16	4.95	5.52	1.71	19.36	2.3
716	ACGTTTGTGAGCCAT	T201A,G260C,C397A,A428G,C598T	47.92	24.91	1.9	0.71	22.3	2.26
717	ACTAAAAATACAGTA	C512T,G691A	20.74	0	0.28	15.91	63.07	0
718	ACTAAAAATGTGCGA	C121A,G441A,A443G,CA512C,C567T,C624T,G635T,G676T	5.92	34.77	0.25	1.48	55.61	1.97
719	ACTAAATTAATTTCT	A78T,T126A,A199G,A285G,T697A	37.39	15.83	6.26	1.04	37.39	2.09
720	ACTAACTTTCTTTTC	A181G,T195A,G319A,T347A,A365T,G395A,A425G,T548C,A558T,T608A,A694T	37.4	27.83	2.61	5.22	20.87	6.07
721	ACTAAGGCTGTTCA	WT	71.67	7.68	2.47	1.74	14.16	2.27
722	ACTAAGTATTTACGT	A194T,T207C,AG220A,C261T,T280A,G355T,C450A,A473T,C630T	4.24	59.31	0.85	0	34.75	0.85
723	ACTAATAATTCTGTC	G444A,GC452G	1.06	78.37	0.05	0.26	18.98	1.28
724	ACTAATATAATTATG	T354A,G593A,A641T	79.39	2.51	3.55	1.67	10.37	2.51
725	ACTAATGTGACCATA	T126C,T137G,A301G,A337T,G352A,T394G,C602T	59.46	10.32	5.73	1.91	21.07	1.5
726	ACTAATTATACTGTT	C139T,C339T,G531A	17.59	39	3.45	0.59	37.45	1.92
727	ACTAATTTCTTTTTT	T31A,G244A	56.25	3.48	5.55	1.16	31.23	2.33
728	ACTACACTTCCGTTT	G52A,A78G,G215A,T429C,C521A,G673T	63.35	4.2	8.78	0.38	21.76	1.53
729	ACTACATTAGTGTGT	T126C,A337T,C339T,T341C,G381A,A474G,G568T,TC586T	55.97	8.07	3.59	1.24	23.6	7.53
730	ACTACCTGTACAGAT	G258A,G271T,T308C,A371T,G426A,A483T,C497G,G574A,T669C,C700T	62.76	1.53	4.42	7.14	14.46	9.69
731	ACTACGGGCGTGACA	C62T,G359A,A648G	51.29	7.77	5.7	7.26	24.35	3.63
732	ACTACTCCCTCTTTA	G257T,C266A,T429C,A560C	65.9	1.23	11.43	1.62	17.51	2.31
733	ACTACTTAGGATCGT	C231T,A268G,A383G,T638C	63.56	1.94	8.27	2.11	23.06	1.06
734	ACTACTTGCGCTATG	A44T,A263T	57.7	5.26	5.89	1.41	27.41	2.33
735	ACTAGAATAGGATTA	G350A,A443T,T509C	56.19	11.38	2.68	4.1	24.32	1.33
736	ACTAGCTCTTAACCA	WT	67.39	7.37	4.4	1.2	17.24	2.4
737	ACTAGGACCAGGAAT	GC517G	39.61	1.57	2.74	4.32	39.61	12.15
738	ACTAGGAGATGCCTG	C336T,G378A,T465A	28.28	28.97	1.38	1.38	37.93	2.07
739	ACTAGTACGTTCGAT	T136A,T621C	67.72	5.22	4.08	1.8	19.61	1.56
740	ACTAGTTGAAATAAA	A358G,C364G,T390C,T539A	7.1	50.82	2.73	0	37.16	2.19
741	ACTATACGGCATCGA	C369T	48.93	18.62	4.26	1.59	23.94	2.67
742	ACTATCGTACTTTTT	T46G,C54T	65.34	6.3	3.29	1.76	21.23	2.07
743	ACTATGCTACAAATC	T293C,T553C,G575A	67.04	5.19	6.24	0.8	17.42	3.31
744	ACTATGGTAGTTCGA	WT	59.86	8.03	4.91	1.56	23.78	1.86
745	ACTATGTATTCTTTC	G378A,A462T	66.95	2.28	6.21	2.14	19.11	3.32
746	ACTATTCACCCCTTC	G32A,C157G,G606A,T632A,G644A,T697C	41.09	3.88	1.24	7.75	44.5	1.54
747	ACTATTCAGTCTAAG	T267C,C269T,A296G,G297A,C437T,C587T	0.36	73.01	0	0	24.98	1.64
748	ACTATTTATTGCTCG	A236G,G593T	57.76	6.63	3.79	2.65	26.89	2.27
749	ACTATTTCGATTTGT	T270A,A285G,A578G,T643C,T688C	54.28	17.42	3.51	1.9	20.83	2.05
750	ACTATTTTATCGAGA	C60T,AC147A,G204T,C307A,T509C,A523T,T548C,T634C,C665A	0.36	0.1	0.15	6.45	31.74	61.2
751	ACTCAAATTATGTAG	G75A,C652T,G680A	63.29	3.85	4.9	1.22	25.7	1.04
752	ACTCACGAGTAAACA	G313A	34.85	23.33	3.94	1.37	34.05	2.46
753	ACTCAGGCATCAATA	G671A	57.45	7.13	5.56	1.65	25.56	2.65
754	ACTCAGTAGTTTGTC	T70C,A194G,A214T,T631C	59.98	3.81	2.1	0.92	30.71	2.48
755	ACTCATCCCGTAGGA	G81A,A578G,T669C	68.85	8.27	3.82	1.5	14.77	2.78
756	ACTCCCTGGTATACA	C164A,A252C	65.05	5.71	5.01	1.29	21.34	1.59
757	ACTCCGTTTTGCGCC	G52GT,T111C,T162C,C458G,G486A,T516A,C627T,G664A	0.81	0	0	10.57	82.93	5.69
758	ACTCGCGGTTTGATT	TC132T,A203T,T509C,T704C	58.32	7.1	5.41	2.65	23.23	3.29
759	ACTCGTAATTCGAAG	A214T,A356G,T631C,A681T	7.21	48.43	1.26	0.47	40.44	2.19
760	ACTCGTCGATGGTAA	G215A,G227A,T392C,G444T	0.64	64.63	0	0	31.51	3.22
761	ACTCGTTCGGACTTC	T317A,C404A,T553C	68.79	2.47	5.24	1.77	20.26	1.47
762	ACTCTAATCTCTTGA	T38A,G134A,AG220A,G378A,C490T	74.09	4.14	2.66	2.02	14.86	2.24
763	ACTCTACCGTGTTAC	T672A	56.02	8.32	7.09	1.84	25.28	1.45
764	ACTCTATATCTTGAA	T162C,C307A,G349A,C515T,T669A	80.65	1.9	5.39	1.04	10.11	0.9
765	ACTCTATGATGGCTT	A166T,C168T,T206A,G294A,G379T,G417A,G433A,A447T,T613A,T634C	9.91	42.95	0.73	1.01	35.51	9.89
766	ACTCTCTAGCACGTT	C367A,T610C	55.62	2.98	5.13	2.81	32.78	0.67
767	ACTCTGCACAATTTT	T354C,C363T,T390C,A443T,C497T	22.22	34.16	1.33	3.81	36.15	2.34
768	ACTCTGGAAAAGTCT	WT	62.28	5.79	5.14	1.79	23.67	1.33
769	ACTCTGGTCTTTTTA	G71A,T174C,A365G,T459C	58.37	7.17	3.83	2.87	25.83	1.93
770	ACTCTTCAATACTAG	A181G,C396T,T516C,A685T	58.76	3.47	4.24	1.93	26.2	5.4
771	ACTGAAGTACAACAA	C94T,A101G,A188G,A338G,G495T,G564C,C571T,C646A	54.32	11.21	0.86	0.86	29.31	3.44
772	ACTGAAGTCGATTCT	G243A	61.28	8	3.52	1.44	23.84	1.92
773	ACTGACGTTGTATAG	C184T,C463T,C615G	64.71	6.27	3.14	1.96	21.18	2.74
774	ACTGATAATACGTAC	A44G,C615G	57.64	5.55	5.61	2.8	26.49	1.91
775	ACTGATGTAGCAAGG	G449T,A663C	12.2	51.49	1.42	0.56	32.77	1.56
776	ACTGATTTTGTCATT	AC141A,T704C	62.3	6.54	5.02	1.98	21.7	2.46
777	ACTGCAATCTGTGGA	A65T,G575A	64.28	8.82	5.41	1.14	16.97	3.37
778	ACTGCCAGTGTTAAC	G414A	63.25	11.26	3.08	1.35	15.68	5.39
779	ACTGCTACTATATAT	T136C,C184G,A296T,T335C,G372A,C527T,G537A	NA	NA	NA	NA	NA	NA
780	ACTGCTATCATACTG	A263G,T545A	56.76	7.62	4.55	1.68	27.79	1.59
781	ACTGCTTCTTCTATT	T643C	65.47	7.59	4.96	1.25	18.09	2.64
782	ACTGCTTTACAGGTA	T50C,T130C,A232G,T361A	62.59	10.43	4.09	1.58	18.55	2.77
783	ACTGGATCACACTTT	G239A,G555T,T638A	55.11	7.22	4.27	2.66	22.78	7.97
784	ACTGGATTATTCATC	T39C,T289C,C675A	15.88	44.12	1.76	0	37.65	0.59
785	ACTGGCATTATCAAC	WT	61.37	6.95	5	1.67	23.26	1.74
786	ACTGGCTTATTAAAA	G426A,G457T,T655C	57.79	7.6	6.01	2.44	22.33	3.83
787	ACTGGGCCAGCTACT	G79A,C143G	67.67	8.01	3.08	2.38	17.05	1.8
788	ACTGTAGTCAATTGA	A47G,C124G,A473T,G488C,C675G	46.4	3.79	1.8	5.8	40.2	2.01
789	ACTGTCGTAATATGA	A26G,T29A,G310T,T361C,T516C,C520T,G599A	64.82	0.82	6.79	2.36	23.77	1.44
790	ACTGTGACTTATCGT	C615A	58.78	6.23	5.51	1.89	25.48	2.1
791	ACTGTGCATGTGAGA	T84C,TG308T,A547T,T621C	70.34	1.27	3.89	4.73	15.85	3.93
792	ACTGTTAATGTTTGT	A152G,T419A	61.41	6.13	5.32	1.81	23.49	1.83
793	ACTGTTCTAGCTGGT	G68C,T308C,G332A,T351A,C400T,A592T	82.93	0.14	2.52	6.9	4.59	2.91
794	ACTTAAAAAAGCAAT	T130A	60.59	5.91	4.76	1.93	24.77	2.04
795	ACTTAAAATATATGC	T216C,A282G,T317C,G319C,T394A,G479T,G585C	5.71	27.5	4.29	0	56.44	6.06
796	ACTTAATTTCTATTA	T42C,G264A,G430A,G651A	52.52	11.28	2.34	1.95	30.73	1.17
797	ACTTACAGGGAGAAA	G163C,C397A,A477T,C552T	54.98	0.94	3.64	4	25.38	11.06
798	ACTTAGCGATCCTAT	G72A,C77T,T137A,G271A,C345T,T354A,A572T	66.86	2.93	4.69	3.23	20.53	1.76
799	ACTTAGGGGTAGCTT	A160T,G245A,T390A,G563A	43.81	6.1	1.75	1.85	45.48	1.01
800	ACTTAGTCGCGCCTC	G66T,C178A,G330A,T545C,T616C	61.24	3.93	3.93	2.53	27.25	1.12
801	ACTTATACACCGTTC	T170C,T469C	64.23	8.55	5.16	1.47	18.54	2.04
802	ACTTATAGAGCCGAA	T283C,G484A	62.69	8.9	5.18	0.69	19	3.54
803	ACTTATCTGGCTTTT	G51A,A83G,C159T,T315C,G422A,G484T,T628A	54.67	1.3	5.2	2.39	31.24	5.2
804	ACTTATTGCTTCGCG	WT	62.37	6.77	4.32	1.68	23.1	1.76
805	ACTTCACAAAACAAG	WT	63.31	6.83	5.02	1.6	20.83	2.4
806	ACTTCCAGTTTCCCA	A338G,C437T,C654T,G676T	57.75	8.66	3.35	1.82	24.77	3.65
807	ACTTCGCTAGTGACA	C36T,T126A,G328A,A371T,A475G,A572T,G579A,G623A	61.6	8.04	4.95	2.79	20.74	1.87
808	ACTTCTCCATCCGAT	A236G,A323G,C482T,T672A	56.03	17.43	4.7	1.05	18.17	2.61
809	ACTTCTTTTCTAATC	C54T,C62T,T111G,A368T,TG605T	47.6	30.77	1.76	1.6	15.06	3.2
810	ACTTGCTACGATTAA	G189T,G294C,T335C,G402A,A425G,C490T,G683A	26.89	35	3.12	0.99	32.15	1.84
811	ACTTGCTACTCTAAG	T565C,C598T,C698A	59.69	5.87	5.33	1.46	24.85	2.8
812	ACTTGCTTAGGAAAA	T153C,T361C,T638A	45.68	7.74	5.39	1.68	37.78	1.73
813	ACTTGGAGAAGTCGA	T325G,GC362G,T401G,A416G,A462T,A483G,T539A,T650C	76.22	2.62	5.17	1.84	13.17	0.98
814	ACTTGTCATGTTCGG	WT	64.93	5.26	6.08	1.95	19.59	2.19
815	ACTTGTTAAATGATA	WT	60.67	6.61	5.47	1.49	23.86	1.9
816	ACTTTAAATGACAGT	A238G,T565G,T661A	43.82	1.65	0.21	16.86	36.41	1.05
817	ACTTTACTAAATCGG	C344T	54.56	7.35	5.06	1.23	28.45	3.35
818	ACTTTACTTTAGCTC	T655C	56.5	6.62	4.67	2.26	28.6	1.34
819	ACTTTCATGGTAGCT	T102A,A167T,A199T,T274G,A285G,A506T,G507A,G673A	2.93	51.85	0.27	3.99	36.97	3.99
820	ACTTTCCTAGACCGT	G32T,A105G,C178A,C411T	65.39	2.51	4.51	1.5	23.58	2.51
821	ACTTTGAGCGTATTT	T90C,T130G,G359A	59.5	9.9	4.41	1.5	21.88	2.8
822	ACTTTGTTAAAGTGG	A45G,G189T,G481A	46.11	6.54	4.67	2.18	34.89	5.6
823	ACTTTTTTTTCTCAG	G106A,A147G,C687G	57.28	5.8	3.34	1.76	28.64	3.18
824	AGAAAATACATCCGT	C129G,C611G,A667G	64.52	5.01	4.12	1.58	22.93	1.84
825	AGAAACAACTCTTTC	T84A,A338T,C637T	65	5.58	3.76	1.43	22.27	1.96
826	AGAAACAGTCAGAAA	C33T,A358G,T509C,A572T,T581C,C665T	4.45	75.91	0.68	0.23	14.96	3.76
827	AGAAACTCGTGACCG	T102A,C415A,G574C	74.32	4.49	5.72	1.17	12.73	1.56
828	AGAAAGATCTCATGA	GA56G,TG70T,A648G	68.29	4.79	2.34	2.2	20.76	1.61
829	AGAACAAAGGCGGTC	C93T,G95A,T137C,A256G,T622A	67.37	2.74	7.27	1.77	18.42	2.41
830	AGAACCTTTCTCCTC	G109C,AC147A,A177G,C307G,G525A,C703A	5.54	38.21	0.85	0.43	46.88	8.09
831	AGAACGAAGGTTTGG	T115C,A156G,A177G,G452A,T539C	73.92	5.39	4.07	1.1	13.2	2.31
832	AGAACTGAAGGATTT	WT	64.11	6.19	4.83	1.64	21.03	2.19
833	AGAACTTAATATTAC	A65G,A542T	55.25	6.44	4.1	1.3	27.4	5.51
834	AGAACTTGGCGCGGT	WT	65.92	5.1	4.06	1.29	21.23	2.39
835	AGAAGCATGCATTGA	G190A,T361A,T390C,G517C,T628C	76.18	5.42	6.45	0.91	10.28	0.76
836	AGAAGTGAATTACCA	G73A,T108C,G318T,A408T,C511G,A689T	63.51	2.9	2.57	4.72	19.11	7.2
837	AGAATAAACATATGT	A383G,G656A	64.93	4.54	4.43	2.05	23.03	1.02
838	AGAATACATTCAGAT	C139T,T351A,T413C,A492G,TC550T,C649G	74.02	1.28	2.58	5.36	12.32	4.44
839	AGAATATGCAGATTC	A82T,G95A,TG562T,G569A,T625A	NA	NA	NA	NA	NA	NA
840	AGAATCACAAAGCTC	T308A,G574T	73.57	8	3.09	1.26	12.58	1.5
841	AGAATGAAGTTCCAA	G95A,T126A	61.41	6.52	3.8	1.09	24.46	2.72
842	AGAATGAGCCCCTCA	T132C,A191G,A236T,G257A,G309A,G328T,A365G,T621A	72.63	1.43	3.58	2.04	19.51	0.81
843	AGACACCAAAGTCA	T137A,G294A,T329A,C393A,A485T,A535T	77.62	2.97	2.87	2.67	12.87	0.99
844	AGACACGTAGCTTAA	CT412C,T601C	57.57	6.06	6.06	0.76	25.75	3.8
845	AGACATCGATGGATT	C266A,T291C,C295T,G350C,T632C,G664A	1.62	63.76	1.37	0.25	31.13	1.86
846	AGACATGGAGAGACA	G67A,T108A,C159T,C278T,C437T,G647A,A682T	74.55	4.03	2.54	2.09	13.82	2.96
847	AGACATGGCTTGTAC	G99A,C602T,A689T	71.82	9.06	2.99	1.2	11.69	3.23
848	AGACCGCTTATAGAT	T280A,G346A	23.79	30.91	5.85	0.59	35.91	2.95
849	AGACCGTAATACTTT	T240C,A299T,G422A	68.55	2.29	4.44	2.29	15.49	6.93
850	AGACGGATACCCGTG	T29G,T315C,C627G	70.33	2.32	3.76	1.33	20.49	1.76
851	AGACGTCTTATTCCC	C619T,A641G	74.26	5.97	2.96	1.28	12.96	2.56
852	AGACTATGATTTTTC	WT	63.78	5.98	4.35	1.68	22.44	1.77
853	AGACTATTAGGTTAT	C41A	61.55	5.79	4.55	1.24	25.89	0.98
854	AGACTCCTTTGACAT	C139A,T162C	65.57	7.36	3.74	1.77	18.77	2.79
855	AGACTCTATTTGTAT	T200C,T207C,G230A,C503G	14.56	2.17	1.52	9.13	63.25	9.36
856	AGACTTAATTTTCTT	T173C	59.86	6.62	4.23	2.04	25.49	1.75
857	AGACTTCCCGCTCCG	T386C,T526A	56.76	0.53	3.71	4.51	26.26	8.23
858	AGAGCACGGCCGTTG	T280C,T704A	21.18	22.66	6.6	0.2	42.36	7
859	AGAGCAGGTCATATT	G134A,T174A,T206C,C521T	64.14	5.98	2.39	2.39	22.71	2.39
860	AGAGCCCGCGCAGTC	T277C,G352A	NA	NA	NA	NA	NA	NA
861	AGAGCGGGGTGTGGG	A166G,C281T,G391A,A456T	51.87	19.77	3.82	1.88	19.9	2.75
862	AGAGCTAGACAGGCA	C158T,A167G,C406T,T420A,T586A	41.08	30.62	4.78	0.73	19.83	2.96
863	AGAGCTGAATTACTA	G66A,T274A,T280C	15.51	29.31	5.98	0.24	43.96	5
864	AGAGCTTTCAGGCGA	T186C,C450T,G563T	69.83	2.49	6	1.32	17.72	2.65
865	AGAGTAGTCGGCATG	T351A,GC395G	71.13	0.76	5.31	3.69	15.15	3.96
866	AGAGTATTCGCAACA	T70G	66.16	6.12	4.54	1.55	19.6	2.04
867	AGAGTGACCGGGCGC	A356T,CT468C,T548C,T638C	52.55	12.29	4.44	1.02	25.31	4.39
868	AGAGTGGGCATTCTA	A105G,G326A,G471A,T634A	38.23	18.72	5.46	0.58	33.73	3.28
869	AGAGTTCTCGGACTA	G233C	54.52	13.27	6.29	1.57	22.23	2.12
870	AGAGTTTAGAATTTT	A214G	55.87	5.31	3.29	0.87	32.82	1.84
871	AGAGTTTAGTGCGTT	C150A,C434T,C521A,C587A,C646T	69.28	4.97	4.22	1.49	17.92	2.12
872	AGAGTTTGAAACTCG	T186G,TG351T,G422T,G534T,A689T	67.28	1.21	2.42	8.48	19.4	1.21
873	AGATAATACACCTCC	T53C,A69G	61.19	5.66	4.56	1.67	25.06	1.86
874	AGATAATTAATCTGA	T39C,C154T,G163A,A338T,G448T,A483G,G487A,A547T,G566A,C588A	38.9	1.5	3.74	2	41.14	12.73
875	AGATACTCTTAGCCT	A194T,T283A,T325A,A371T	1.21	55.7	1.21	0	41.47	0.4
876	AGATACTTTTAAGTC	T270C,T420C,C423T,G595A	57.84	9.41	3.87	1.41	23.37	4.1
877	AGATAGCACGCAGCA	T111G,A694G	50.53	1.92	0.86	7.45	38.56	0.68
878	AGATAGCTTGTATGT	G52C,T557C	62.59	8.04	5.67	1.46	18.61	3.62
879	AGATAGTTCCGAATT	WT	65.19	6.26	4.5	1.6	20.61	1.83
880	AGATATACGATAAGA	G106A,C150A,A188T,C646T	59.04	3	3.18	3.18	29.39	2.22
881	AGATATATACGATAT	WT	67.17	9.4	3.51	1.59	16.09	2.25
882	AGATATCTATATAGG	WT	60.63	6.63	4.87	1.65	24.19	2.03
883	AGATCAAGGGAAAAG	T50C,A238G,G297T,C345A,T440A,A447G,C615T,A689T	0.19	91.35	0	0	8.32	0.14
884	AGATCCTGAGTTTCC	A285G,T650C	44.64	10.92	2.32	2.32	37.68	2.13
885	AGATCTATAGATTCC	G109A,C398T	70.78	1.3	4.44	0.97	18.29	4.22
886	AGATCTCTAGCGTGA	T108C,C168T,A181G,T660A	60.88	7.09	2.21	2.21	24.45	3.17
887	AGATCTTGCCGTCTT	WT	73.37	6.2	3.24	1.8	13.31	2.07
888	AGATGAGGATTATCC	C129T,TG308T,T327A,C437T,G471T,TC601T,G606T	70.09	4.14	3.27	4.56	16.24	1.7
889	AGATGATTATTTTCT	G97A,C624T	62.96	9.22	4.52	1.22	19.47	2.61
890	AGATGGACCGCCTCA	A147G,T459C,G501T,G534T,C571T,T608C	59.64	4.88	4.11	2.06	29.31	0
891	AGATGGCTGATTAAA	G95A,C411T,A513G,C596A	68.03	2.86	4.72	2.18	17.68	4.53
892	AGATGGGTGTAAATC	G35A,G104A,T136A,C139T,A156C,C324T,T347A,A473G,A590G	59.61	6.3	7.04	0.93	23.88	2.24
893	AGATGTTACAGTCTG	A365G,T491C,T604A	70.14	7.57	3.1	1.22	14.79	3.17
894	AGATTAAAATCGTTA	G228A,A572G	49.51	11.76	4.25	1.09	31.52	1.88
895	AGATTAAACATATCA	G73A,A156T,G243A,G318A,A343G,T351A,A371G,C478A,G517GC,C552A,G593T,T628A,C703G	NA	NA	NA	NA	NA	NA
896	AGATTACGGATGCTC	G172T,C442T	18.47	54.55	1.71	0.7	22.29	2.27
897	AGATTCCAGGCGGTG	G73A,G691A	20.95	0.41	0.14	34.15	44.22	0.14
898	AGATTCGAAACTCTC	T650C	60.81	3.92	3.66	3.03	27.94	0.64
899	AGATTCTGCGCACTT	C231T,A365G,G524A	1.34	0	0.27	10.96	49.21	38.22
900	AGATTGAGAAATAA	T420A	31.79	50.94	1.78	0.37	13.27	1.85
901	AGATTGTTGTGTATA	WT	60.55	4.59	5.96	2.06	24.31	2.53
902	AGATTTAGTAACTGG	A101G,C588T,T650C	56.47	3.13	3.6	2.26	32.85	1.69
903	AGATTTATTTACAAC	G192T,C269T,A285G,G331T,T401C,A408T,C468A,C478T,T509G,C588A	16.62	0.55	0.55	10.25	60.39	11.64
904	AGATTTGACTGAACT	A191G,A202G,G258A	54.23	8.71	5.2	1.56	27.57	2.73
905	AGATTTGGTGCTTGC	T42C,T432A,A474T,T509A	67.38	1.2	4.02	4.49	20.51	2.41
906	AGATTTTACAGTGAT	T84C,G99A,A203T,C312T,T605A	45.23	16.88	2.6	1.74	29.36	4.19
907	AGATTTTGCGAGACA	G670C	65.14	7.28	5.52	1.52	18.07	2.46
908	AGATTTTGTAAGACC	C157T,A226G,G305T,C339T	65.92	12.86	2.99	1.46	14.88	1.88
909	AGATTTTTGTCAGCA	T174C,G555A,A580T	69.24	7.43	2.82	1.48	15.75	3.27
910	AGCAAAAGCCCACAC	A59G,A78G,A188G,G331T,A371T,G379T,T498C	65.18	0.94	3.98	3.63	23.79	2.47
911	AGCAAGCAATAGTGC	TG669T	68.46	11.47	3.88	0.67	13.49	2.03
912	AGCAAGGTATGACTC	WT	64.93	6.05	4.64	1.16	21.56	1.65
913	AGCACAGTTAGACTG	A156G,T333C,A356T,A368G	73.89	2.67	4.71	2.03	14.58	2.11
914	AGCACCCTATCTCGC	A191G,T274C,G318A,C512T,T634A	58.55	8.55	6.84	1.28	22.22	2.56
915	AGCACGAATATAACT	T508A	64.38	6.08	4.63	1.49	20.71	2.71
916	AGCACTACGATATGA	G210A	52.6	5.76	5.58	1.3	31.41	3.35
917	AGCACTTTATAATAA	C468A,A590G,A653G	41.69	6.71	1.75	5.25	43.15	1.45
918	AGCAGAGACCCACAT	WT	62.88	6.04	4.69	2.01	21.76	2.61
919	AGCAGGTAACAGAAT	WT	67.13	6.37	4.09	1.99	19.92	0.5
920	AGCAGTTAGATTTGC	A78T,G366A,A609G	55.39	11.87	3.49	1.1	24.75	3.39
921	AGCAGTTCCTGTCTA	T122C,T419A,G636A	66.86	7.42	5.55	1.47	16.53	2.15
922	AGCATACTGAGAGCT	C261T,G426T	50.54	10.1	4.34	1.24	22.9	10.87
923	AGCATAGGGGTTATA	G72T,G112T,A120C,G271T,T274C,A542G	73.1	1.41	2.22	3.45	17.79	2.04
924	AGCATGACGTGTTAG	G103T,T241C,C307T,G387A,T440C,T631A,G644T,A681G	15.14	49.82	1.67	0.27	31.08	2.02
925	AGCATGAGCCGTCAT	WT	66.55	4.55	3.9	1.19	21.54	2.28
926	AGCATGCTTACGGGT	WT	63.06	6.05	6.44	1.76	19.59	3.1
927	AGCATGGCTGACCCC	G75A	66.56	5.28	4.42	1.89	18.77	3.07
928	AGCATGTCAATTCAC	T293A,C424G,G499A,C646T	1.97	38.36	0.7	0	43.37	15.59
929	AGCATTAAATCCACT	C92A,A425G	48.85	23.04	1.84	1.38	22.58	2.3
930	AGCCAAATCCATTAA	T625A	48.59	5.1	5	3.28	37.03	0.99
931	AGCCAAGAATTTTAA	T218C,C412A,C436A,G444A,T504C,A541T	0.82	1.37	0	0.55	93.41	3.84
932	AGCCAATAATGAGAA	C295T,T392C	48.53	23.03	4.68	1.1	21.12	1.54
933	AGCCAATTGTTAGAA	T31A,A483G,T565C	71.8	5.51	6.58	1.17	12.36	2.58
934	AGCCAGTGGTGGAAG	A101G,T131A,T655C	61	5.67	6.14	1.53	23.54	2.12
935	AGCCATAGACAAACT	T38G,G72A,C157T,C159A,G227T	72.29	6.63	3.6	2.02	14	1.46
936	AGCCATAGCAAGGTC	A152T,G471A	51.36	12.78	2.92	1.35	29.14	2.44
937	AGCCCGGGCGACAAC	C577T	56.74	3.23	2.35	2.64	33.57	1.47
938	AGCCCGTAAGTTATC	T280A,T347A,A358C	21.24	30.77	5.08	1.08	37.69	4.14
939	AGCCCTACACTCCGT	G313A	39.35	22.15	4.72	1.21	30.27	2.29
940	AGCCCTCTTAATCCG	A156T,G566A	63.06	5.47	3.76	1.25	24.06	2.4
941	AGCCGCACGTGTTAA	T293A,A385G,A477G,T660C	2.2	49.63	1.39	0.09	36.42	10.26
942	AGCCGCCTGATCAAG	G79T	66.67	7.09	3.6	1.86	18.57	2.2
943	AGCCGGCAAGTTTCA	C34T,A147C,T277C,G346T,T548A,G639A,G676T	60.59	4.44	5.37	1.07	27	1.52
944	AGCCGTTAAAGCCAA	C85G,G103A,T179A,A323C,C453T,T509C,A523T,G574A,G584T,G595A,C652T,A667T	0.16	0	0	3.27	21.53	75.04
945	AGCCGTTTACCAGGC	C135CT,A214T,G318T,T616G,T634A	62.62	0.9	3.6	2.25	28.38	2.25
946	AGCCTATTACATGAA	G259T,T274A,C497T,T516C,T672A	57.15	0.53	4.06	9.4	22.97	5.89
947	AGCCTCTGATCCTGA	G319A,G387T,G433A,T446C,C454A,A592G,G636C,T688A	0.45	71.49	0	0	27.39	0.67
948	AGCCTTCGCGTTTTG	A337T,G387A,C576T	41.21	17.45	3.05	1.79	34.05	2.44
949	AGCCTTTAAGCGCTC	A118G,C121A,A416G,C455T,C458T,T586A,G614A	61.76	8.3	4.85	1.19	22.45	1.44
950	AGCGAACTCTTTATA	WT	64.89	5.93	3.29	1.92	21.81	2.16
951	AGCGAATCGTCTTTA	WT	63.61	5.88	4.22	1.26	23.64	1.38
952	AGCGAGGGAAGCGTA	T86C,T280G,C286T,C336A,A416G,C596T	0.82	82.83	0.48	0.04	14.98	0.85
953	AGCGATAGTAGTATA	WT	63.82	6.38	4.99	1.73	21.04	2.03
954	AGCGATTATTCGGCG	G112T,T179C,T504C,G517A,T634A	7.04	1.41	0	16.89	63.84	10.81
955	AGCGATTCTAACCAT	G30A,T116A,C158A,T240A,G544A	61.25	6.43	6.22	1.2	24.1	0.8
956	AGCGCGAGGGGGGCC	T179A,A456T,A533T,G555A,A689G	65.22	11.78	5.93	1.13	13.99	1.95
957	AGCGCTTGGGAAGTA	TG70T,C273T	72.17	4.33	3.33	2.27	16.43	1.47
958	AGCGGCAGTGTGAAG	WT	64.21	6.87	4.75	1.63	20.47	2.07
959	AGCGGCGGGGGCAAG	WT	65.53	6.31	5.07	0.95	20.14	2
960	AGCGGGAATCGGAAC	A82T,G104A,T317A,A337G,CA442C	0.38	53.32	0	1.47	20.64	24.19
961	AGCGTATAAAGCGAT	G56A,A356T,C527T	53.91	6.06	4.6	2.3	31.21	1.93
962	AGCGTCATACAAATG	WT	61.75	8.08	5.1	2.26	20.67	2.14
963	AGCGTGTGGAGTAGC	WT	65.21	6.92	4.4	1.6	19.31	2.56
964	AGCGTTGCACTTTCG	T386C,C418T,C618T	63.51	12.67	4.33	1.34	15.66	2.49
965	AGCGTTTGATTATCT	T302C,T303C,A365T,A483G,G633C,C646T	83.93	1.16	4.15	2.7	6.84	1.21
966	AGCTACCTTGTATTA	C703T	51.59	5.68	9.54	2.28	29.32	1.59
967	AGCTACCTTTAGTTT	T162C,A416G	55.47	14.44	4.74	1.46	23.09	0.8
968	AGCTATACACGGTTC	T137C,C292A,C410T,CT603C	11.07	70.8	1.17	0.3	13.66	2.99
969	AGCTATACTACAAG	C63T,A252G	55.39	16.73	4.53	1.22	18.46	3.68
970	AGCTATATATCGTCT	T543C	62.56	9.79	5.25	1.4	17.8	3.19
971	AGCTCAAATTGCACT	G100C,G328A,G499T	52.79	5.36	4.43	2.65	32.64	2.13
972	AGCTCCCGTCTTCAC	T255C,C367T,G461A,A578G	45.85	30.08	4.13	0.75	16.75	2.44
973	AGCTCTGGTACTACT	C121T,T669A	61.89	4.26	4.73	1.3	26.27	1.54
974	AGCTGATGGATGTCT	T389C	71.62	2.32	6.24	1.52	17.13	1.17
975	AGCTGTGCGCCTCGA	A428G,T557A	27.17	51.03	3.33	0.16	16.87	1.44
976	AGCTGTTAATACTGT	G68A,G98C,G172A,C197T,T308A,T491C,T498C,G569A,T625A,C649T	65.98	6.4	2.84	1.99	19.76	3.03
977	AGCTGTTGCAACAAT	C62A,T401C,A408G	63.07	3.59	7.95	3.08	21.28	1.03
978	AGCTTAGTAAGCATC	A209T	55.19	6.44	6.2	2	28.45	1.72
979	AGCTTCTATAGCGTT	T116C,G391C,G452A,G510A	65.36	6.33	5.82	1.94	17.96	2.59
980	AGCTTCTGTGTACCA	G479T,T688A	45.58	11.62	3.78	2.49	34.13	2.39
981	AGGAAAGTTACTTCT	A368G,C454T	58.15	8.37	4.62	1.88	25.69	1.29
982	AGGAACGCATCATCG	A57G,T216C,C405A,A462G,C567G,G679T	33.25	0.5	0.99	9.67	55.33	0.25
983	AGGAATCACCTAGTC	T302C	61.62	3.12	5.52	2.88	25.9	0.96
984	AGGAATTTCCTTTTT	A358G	NA	NA	NA	NA	NA	NA
985	AGGACAGATGTACAA	C33T,T516A	18.57	2.86	0.72	19.28	36.42	22.15
986	AGGACGGCATATCAG	T625C	63.67	5.68	3.26	1.63	23.35	2.4
987	AGGACTGGGGTCATT	A425T,C514T,A523T,G531T,T539A,A547G	0.44	0.15	0.05	6.6	11.79	80.97
988	AGGACTTAATAGAAT	T136A,T699C	59.09	7.26	5.45	2.12	23.7	2.37
989	AGGAGACGTGGGCGA	A533T,T625C	67.64	6.44	4.41	1.77	16.47	3.27
990	AGGAGCCACCCTCCA	A203G,G378A,G569C,C668A	72.36	1.75	5.05	1.43	16.7	2.71
991	AGGAGTGAATCCCTC	G112T,G245C,A296T,A365G,G488T,G617A,T631C,G644T,C652T,A681G	0.3	66.99	0.2	0.1	31.8	0.6
992	AGGATAGTATGCCTT	WT	61.93	5.9	3.22	1.88	25.47	1.6
993	AGGATATCCAAATAT	T74G,A358T,T605A,A682T,T697C	33.66	20.46	2.97	4.29	34.98	3.63
994	AGGATATTCCTGCCC	T302A,G332A,A365G,T491A	77.19	0.43	5.43	4.13	11.52	1.3
995	AGGATCCTGTATTAT	A166G,G540A,G617C	48.46	1.36	2.59	7.85	35.42	4.32
996	AGGATGTGGAGTCG	G76A,C406T,C450T,C512T	82.9	2.83	3.64	0.45	6.19	4
997	AGGATTATTATAGAC	WT	60.53	6.9	5.51	2.4	22.63	2.03
998	AGGATTCTAAGTTGT	A236G,T283C,TG459T,T550A,T643C,T660C	35.79	32.79	3.56	0.8	25.17	1.89
999	AGGATTGATGAAGTT	G387T,C423T,T432A	70.3	5.88	3.53	1.14	15.73	3.41
1000	AGGATTGATGATTTG	G163A,C602G	65.64	5.3	5.6	1.29	20.5	1.66
1001	AGGCATTCTTCGTCC	A238T,G297T,G444T	0.14	93.04	0	0.05	6.16	0.61
1002	AGGCCACCCATTCCT	C286G,G326A,G461A,T553A,T605C,A648T,T704C	18.32	42.23	2.39	0.4	33.86	2.8
1003	AGGCCAGGAGCAGGG	C453T,G629T	59.46	10.18	3.39	2.81	22.8	1.36
1004	AGGCCGATGGATGGG	C142T,C266A,C396G	55.39	6.11	11.87	1.44	21.94	3.25
1005	AGGCCTACTAGGTGG	T545A	56.55	7.46	5.91	0.77	27.76	1.55
1006	AGGCCTCTTTCACAA	C367T,A592C	51.93	15.68	5.16	1.43	22.71	3.08
1007	AGGCCTTTATGTCTT	T620C,A663T	60.15	5.92	4.69	2.02	25.85	1.36
1008	AGGCGGGAGAGGCGC	WT	63.56	6.28	5.5	1.26	21.36	2.04
1009	AGGCGTGAAATTAGT	T53C,C63T,T302A	59.58	7.36	5.14	1.25	25	1.67
1010	AGGCGTGACGCCCAT	A147G,A177T	54.69	4.98	6.91	2.21	29.28	1.94
1011	AGGCTAATCGAGTTC	T126C,G349A,G414C,A475G	78.75	0.29	4.07	2.04	12.81	2.05
1012	AGGCTACGGGGGTTC	WT	63.78	6.27	4.97	1.63	21.8	1.55
1013	AGGCTCTCGCATTTC	C164T,T317A,T394A,G575C	47.35	18.05	6.21	0.98	23.19	4.23
1014	AGGCTTTTTGAGTCA	C612A,T628A	54.26	6.03	4.37	1.87	31.18	2.29
1015	AGGGAAATAAAGTTA	G87A,T280C,C400G	18.63	22.72	8.07	0.41	46.82	3.34
1016	AGGGACTGTGCCTGG	A408G,G501T,C624A	70.4	4.88	7.55	0.76	14.78	1.63
1017	AGGGAGCGTGAGCGG	C164T,T255A,C615A,G657A	72.56	3.95	2.87	2.08	17.24	1.29
1018	AGGGATCCTTCATTC	T401A,A475G,A597G	63.71	4.56	6.04	1.38	21.2	3.09
1019	AGGGATGTCTTCAAA	A65T,C400T	68.02	5.76	4.07	1.77	17.64	2.74
1020	AGGGCAAACTAAGTG	T122A,T335C,G350A,T581C	80.49	0.36	5.39	3.23	8.61	1.92
1021	AGGGCGAATTAAAAT	T140C,T162C,G239C,T302C	62.09	3.67	6.97	1.74	23.21	2.33
1022	AGGGCGAGGAGCGAT	G73T,G89A	70.3	4.75	3.52	1.93	17.4	2.1
1023	AGGGCGTTAGGTTAT	T31A,A59G,A251T,A580T,T669C,C687T,T692C	1.68	0	0	13.97	83.79	0.56
1024	AGGGCTTTTACTATT	A338T,T374C,G635A	46.5	10.96	2.8	1.27	36.94	1.53
1025	AGGGGAGGGGCGGTG	C64A,G639A	65.28	5.89	5.62	1.23	18.9	3.08
1026	AGGGGGGGCGGGAGA	C158G,A338T,C642T,C649G	65.79	4.56	3.58	1.95	20.52	3.6
1027	AGGGGGTTCACTACC	G81A,T604G	66.33	4.05	3.24	3.59	21.01	1.78
1028	AGGGTAAAATCCACT	A167G,A301T,GC517G,C640G	38.34	0.76	0	13.16	45.49	2.26
1029	AGGGTATAGGATAAC	T153C,A191G,A203G,C454T,C478T,T634A,T643A,G673T	50	5.98	1.28	0.43	40.17	2.14
1030	AGGGTGCGTGATGGC	A572G	59.2	4.84	4.41	2.95	26.41	2.19
1031	AGGGTTACTTAATGC	C269T,T390C,A416T,C646T,T666C	61.14	0.38	2.1	8.95	26.86	0.57
1032	AGGGTTAGATTCTCA	C149T,T179A,T392C	63.51	8.03	5.2	2.2	19.65	1.41
1033	AGGGTTATTTTCGGT	TG498T	23.94	2.52	1.35	8.5	44.11	19.57
1034	AGGGTTCTTGTATTA	T283C,A365T,T545C,T638C	40.68	11.48	8.45	0.95	33.85	4.59
1035	AGGGTTTGGTATTGG	T270C,G297T,G377T,T440A	0.26	83.78	0.09	0	15.45	0.42
1036	AGGGTTTTAATTTGT	G284A,T308G	53.09	11.86	4.87	1.21	26.65	2.31
1037	AGGTAAGGCATTTAG	A78G,T179C,G350A,T409C,C567A	77.48	0	5.32	4.84	12.11	0.24
1038	AGGTAATGGTGCCAT	WT	62.64	6.06	4.8	1.67	22.78	2.06
1039	AGGTACTCATTGATA	C64A,C139T,A194G,T392A,C530T,T536A,T643G	NA	NA	NA	NA	NA	NA
1040	AGGTAGCGGTCATCA	T131C,C178T	64.68	5.61	2.64	1.65	22.78	2.65
1041	AGGTAGTCCGACCAT	A181T,T293C,T459A,T634A	59.29	6.31	6.15	1.33	25.41	1.5
1042	AGGTATTGGTTGGTG	G128C,A220G,G229A,T303A,G461T,T625C,G647A,A653T	54.13	9.67	2.39	1.96	30.54	1.31
1043	AGGTCAGAAGTATC	T321C	78.64	2.42	2.85	2.25	11.93	1.91
1044	AGGTCAGTGTCAGTC	G457A	67.3	4.82	4.82	2.15	20.11	0.8
1045	AGGTCATCACCGAAT	C397A	74.44	2.04	4.54	1.97	14.09	2.91
1046	AGGTCCATAACGCAG	A580T	64.91	4.51	4.17	1.57	23.35	1.49
1047	AGGTCTACTTGACAG	G332A,C458G,G651A	75.46	0	5.74	3.66	13.32	1.82
1048	AGGTCTTTCACTTTG	A220T,G499A	59.3	9.7	4.48	2.13	21.68	2.7
1049	AGGTGCCCGGCGTAC	T130C,C436T,T440A,G488T,G563A,T616A,T638C	42.67	1.29	2.16	6.03	42.24	5.61
1050	AGGTGCCTGCACTCA	T131C,T153C,C393T,C455CA,C587T	42.6	14.96	3.7	1.64	34.54	2.54
1051	AGGTGGAAAGCGCCA	A96T,A477G,G525A,G693A	56.27	3.07	3.83	4.41	28.04	4.37
1052	AGGTGGAGTAACAAA	G239A,T557C	65.47	9.93	5	1.45	14.93	3.21
1053	AGGTGGGTGATTACT	C41T,A256G,G538A,A578G	68.87	3.38	6.31	2.28	16.43	2.73
1054	AGGTGTATATGCGGT	C155T,AG232A,G319C,G350A,A408T	77.74	0.14	5.23	2.87	12.03	1.99
1055	AGGTTATACCTATGA	C63T,TG498T,T543C	32.22	3.2	2.29	5.5	42.6	14.2
1056	AGGTTATCTTAGAGA	T90C,T122C,C157A,G298A,G427T,T565A,G676A	4.96	77.13	0.45	0.05	13.87	3.54
1057	AGGTTATTGTTAGGA	T126C,G569T	66.09	7.19	4.52	0.55	19.66	1.99
1058	AGGTTCAGCACATCA	C630A	65.25	6.91	5.03	1.51	19.45	1.85
1059	AGGTTTTCCAACTTC	C92T,C398A,G525A	67.48	1.51	2.48	3.63	20.34	4.55
1060	AGGTTTTGAACTGTG	C157T,C404T	70.41	5.99	3.94	1.12	16.29	2.24
1061	AGGTTTTTACCTCCA	WT	60.35	4.6	5.36	3.45	24.9	1.34
1062	AGTAAACAATCACAA	A167G,A256G,C442A,T704A	75.42	2.59	4.63	1.8	14.11	1.45
1063	AGTAAACTTTTTAGA	G66A,G656A	65.66	5.46	3.35	2.36	21.59	1.58
1064	AGTAAAGGAATTTAT	G377A	66.31	2.33	5.09	1.64	22.46	2.17
1065	AGTAAAGTTTAATGA	A147G	60.12	6.95	5.65	2.14	22.71	2.42
1066	AGTAACCTTTTTCGC	T655C,C703T	59.99	6.59	5.6	2.3	23.6	1.92
1067	AGTAAGTGCACTATC	T302A,T361C,C423T,G480A,G529A,C552A	11.04	24.13	1.42	0.63	51.58	11.21
1068	AGTAATATATCAAGA	WT	57.31	6.96	5.94	1.87	25.89	2.03
1069	AGTAATCAGTGTGAT	G233A,C269T,G275C,G322A,T354A,C552A,C567T	51.32	5	4.07	3.6	33.8	2.21
1070	AGTAATGCCTAATTC	C415A	65.13	3.76	4.53	2	22.89	1.68
1071	AGTAATTAGCTGGAC	WT	61.96	6.04	4.75	1.97	22.72	2.57
1072	AGTACATTCTCAATT	T42A,G104A,A338C,G342A,A416G,G445C,T508C	0.45	84.67	0	0	14.43	0.45
1073	AGTACGACTGGTATA	T108G,A177G,C364G,G391A,G452A,G575A	56.26	17.12	5.98	1.36	17.39	1.9
1074	AGTACGGCAGATTTC	C489T	65.63	7.32	4.97	1.44	18.82	1.82
1075	AGTACGTTTTAATAA	T429A,A597G,T613A,T616C,T661C	59.68	9.58	4.27	1.63	22.81	2.02
1076	AGTACTATTGCTCGG	G417A	64.16	5.83	5.22	1.77	21.83	1.18
1077	AGTACTGCCGGACCT	T173C,A209T,C339T,A383G,A416G,T528C,G555A,T565C	20.25	52.26	3.06	0.48	22.83	1.12
1078	AGTACTTCTTTTATG	C307A,A425T,T608C,A663T	54.05	7.13	4.16	1.39	26.73	6.54
1079	AGTAGAATCATTTTA	C121T,G297T,G433A,T440A,G441A	0.13	81.35	0.09	0.13	18.05	0.25
1080	AGTAGCGCAGTGGTC	T283A,G318A,G427T	0.79	74	0.25	0.12	22.28	2.55
1081	AGTAGCGTCCATATA	A199T,G311A,GA355G,C497G,T509C,C511A,A592T,C642A	63.13	0.26	3.16	16.13	15.18	2.14
1082	AGTAGCGTGGGATGG	C36T	64.88	6.08	5.16	1.22	20.17	2.48
1083	AGTAGGAATAGCTAG	A96T,C278T,C345A,T394C,A438T,G487A,C646T	36.13	1.93	1.93	2.58	54.2	3.22
1084	AGTAGGTAGGCGAAT	WT	61.08	6.94	4.83	1.57	23.47	2.1
1085	AGTAGGTATCTTTT	C642A,T643A	64.18	8.37	3.37	2.21	19.76	2.1
1086	AGTATCAGTTCCTCG	G67A,A236G,A251G,C292A,C478T,T545C,G584A,A594T	13.1	61.11	1.83	0.61	19.7	3.65
1087	AGTATGATGGAGTCA	T186C,T429C,A513G	65.78	3.6	3.6	4.5	18.02	4.5
1088	AGTATGCATACTAAA	C165T,T277C,G487T	49.61	6.69	7.35	0.92	31.76	3.67
1089	AGTATGTACGTCATT	C121T,G229T	51.32	9.87	3.95	0.99	32.07	1.8
1090	AGTATGTGAGGTAAG	G230C,G271A,C400G,T638C,T661A	70.19	2.49	6.07	2.75	17.63	0.87
1091	AGTATTGTGTTGGAG	C149T,A191T,T341C,T361A,A475G,C527A,C662A,G683A,G686A	45.03	1.65	2.49	4.69	43.92	2.22
1092	AGTCAAAGAGCTTAT	A209C,TG308T,T545A,C570T	65.46	1.09	4.92	4.48	23.61	0.44
1093	AGTCAAATGCATTAG	A232G,C273A	77.85	2.64	3.29	3.17	11.87	1.17
1094	AGTCAACCTTTAACG	G196A,T605C	63.34	5.85	6.11	1.41	19.68	3.61
1095	AGTCAATATTTGGAA	C591T,A689G	58.62	4.68	3.94	2.45	28.23	2.08
1096	AGTCACGACTTTTTA	C157T,A337G,T401C,C405T	81.64	0.33	5.17	1.98	9.23	1.65
1097	AGTCACGTGATGATC	G311A	83.81	0.41	3.32	3.1	8.21	1.15
1098	AGTCATACAATTAAC	G123A,T516C	60.75	6.19	3.73	2.21	24.83	2.28
1099	AGTCATGACTTGTCA	T86A,C121G,C146T,A513T,G540T	53.94	4.89	3.57	3.57	32.33	1.7
1100	AGTCCCGGCCCACTT	C295T,A592T	50.48	18.44	4.83	0.44	21.95	3.85
1101	AGTCCGCAAGAACCT	G79A,TC409T,T621C	61.42	14.28	2.2	2.03	17.4	2.69
1102	AGTCCGTGGACGTCT	A83G,G372A,T491C,A494T,A523T,T628C	0.81	0	0	6.2	26.44	66.55
1103	AGTCCGTGTTTGTTT	T351A,T401A,T465A,G639A	78.78	0.89	4.85	2.75	11.26	1.47
1104	AGTCCTAATTGAATT	A177T,A246T,T669A	62.45	3.79	4.73	2.21	26.5	0.32
1105	AGTCCTGCACAACTC	C281T,T440C,G524T,A542G	0.81	0.2	0	9.93	25.13	63.93
1106	AGTCCTGTGCCACAA	A44T,A88T,A232T,TG274T,A385G,T409C,G430A,A475G	NA	NA	NA	NA	NA	NA
1107	AGTCCTTGGTCATAA	T308A,A648G	59.64	3.31	2.11	2.64	31.52	0.76
1108	AGTCGAGCAAGTAAA	G30A,T53C,G566A	57.52	7.37	6.05	2.36	25.37	1.33
1109	AGTCGCCCGGCAAAC	A147G,A181G,TA218T,G569A,A594C	54.73	12.98	4.49	0.83	24.96	2.01
1110	AGTCGGAGTGCCGAT	A462C	61.64	20.97	2.16	0.8	12.65	1.77
1111	AGTCGGGCTTCGATT	WT	65.5	5.91	5.25	1.47	19.52	2.35
1112	AGTCGTATTCATAAC	G104A,T179C,A226T,C312T,G626A,T631C,T650A	40.15	23.72	5.12	1.08	25.07	4.85
1113	AGTCGTCAAGGATCG	WT	67.47	6.65	4.62	1.49	18.03	1.73
1114	AGTCGTCAATAGTAT	WT	64.02	6.03	4.68	1.92	21.25	2.1
1115	AGTCGTTTATCTGTA	T102C,G260A	63.77	6.87	3.57	1.98	21.71	2.09
1116	AGTCTACTTACTTGA	G109T,A232T,T697C	54.55	4.82	5.48	2.93	30.26	1.96
1117	AGTCTATCATTTACT	T102C,T179C,T327C	74.66	0.99	5.13	3.09	15.18	0.95
1118	AGTCTATGTCTCACA	T300C,G387T,C423G,A541T,A594T	46.87	11.17	2.72	1.77	35.69	1.77
1119	AGTCTCACATCTTCA	C503T,G599A	53.3	3.17	1.81	6.33	31.13	4.25
1120	AGTCTCCTAAATTCA	T46C,A191G,G319A,A334G,A494T,T581A,G607C	67.25	1.74	3.71	1.74	24.67	0.88
1121	AGTCTGTCTTTTTTA	A451T,G480T	44.79	11.44	3.05	2.69	30.55	7.49
1122	AGTCTTATTTAAATG	C94T,GA250G,G304A,A447G,G461T,C589T,T704A	4.56	74.89	0.27	0.32	19.65	0.31
1123	AGTCTTCGTTCTTTT	G134T	72.67	4.93	3.73	1.3	16.01	1.36
1124	AGTGAACCTAGGTAA	C424A	44.16	18.87	3.73	1.31	27.22	4.71
1125	AGTGAATAATGTGAA	G510A	66.58	6.39	5.06	1.46	18.77	1.74
1126	AGTGAATATGACATC	A220G,T440A,G582A	45.02	2.67	2.14	2.67	47.15	0.36
1127	AGTGACCCGATCTTT	A578T,G690T	69.61	4.01	1.32	3.49	20.37	1.2
1128	AGTGACTTAACGCCC	G30A,A282G,A408G,G559A	11.97	26.2	4.19	0.6	51.2	5.85
1129	AGTGCCTAGGACAAA	T116A,T401C,T528A,C675T	54.88	1.84	4.97	2.21	34.81	1.29
1130	AGTGCTCGTCGGATC	T86C,G99C,A578G	62.47	8.88	5.47	1.13	19.46	2.58
1131	AGTGCTGATTTTTCT	A156T,A224T,G346A,G378A,A443G,T446C,A513G,G538C,T557C,A597G,C700A	0.37	78.06	0	0.37	13.14	8.06
1132	AGTGGACAAGACACG	T162A,A299T	74.57	2.73	4.98	2.32	13.74	1.65
1133	AGTGGGAGCGAAATG	G80T,G104A,G234T,C454T,T498A	48.2	35.42	2.21	1.05	10.02	3.11
1134	AGTGGGGTATTCTTA	WT	63.23	7.59	4.68	1.84	21.11	1.54
1135	AGTGGTACGGGACTG	AC59A,C133A,A203T,T291A,G331C,G350C,T351A,G366A,A408T,T420C,C577A,G645A,T655G	22.41	21.04	2.93	1.03	42.93	9.65
1136	AGTGTAACCCAAATA	WT	64.66	6.01	4.01	2.46	20.86	2
1137	AGTGTAACGAGATCT	T137C,A492G,G500T,C522T,G629T,T631C	70.49	8.59	4.16	0.55	13.3	2.91
1138	AGTGTACACCTTAAA	A88G,G342C,A343G,G349A,G355T,A368T,G426T,G460A,A494G	33.74	26.38	2.3	1.54	33.89	2.15
1139	AGTGTACCACCTTTC	WT	61.49	6.34	4.79	1.84	23.5	2.04
1140	AGTGTAGATCCTCGT	A246T,A282G	12.06	55.27	1.75	0	26.97	3.95
1141	AGTGTTTGCTGTGGT	T115A,T302C,T341A,G444T,C615G	1.87	82.27	0.05	0.09	15.05	0.67
1142	AGTTAACATCGTTTT	T650C	57.11	3.41	2.94	3.41	31.96	1.17
1143	AGTTAATACGGTCGA	A120T,G457T,T616C	66.81	4.59	4.08	1.76	21.25	1.5
1144	AGTTAGAATACGAAG	A160T,G346C,C624A	40.56	19.35	0.46	0	2.3	37.32
1145	AGTTAGATACAGTTT	G639A	63.12	7.44	5.72	0.92	20.54	2.27
1146	AGTTAGATGATCTTT	G319A,A590G	69.19	4.29	4.53	1.83	18.11	2.05
1147	AGTTAGGACTACAACG	A105G,T347C,A425G,T562C,G683T	65.85	11.24	4.64	0.77	15.77	1.73
1148	AGTTAGTACATGAAT	T31C,AC285A,T325A,G352C,G499A	44.64	5.36	7.1	2.03	39.42	1.44
1149	AGTTATCTGAGTTTC	G91A,A203T,C503A	27.6	1.53	1.22	7.97	55.22	6.45
1150	AGTTCACACAAAGTG	TG50T,T186C,A214T,G304A,C407T,AG494A,A648G	NA	NA	NA	NA	NA	NA
1151	AGTTCACTTTGAATA	C92T,AC156A,GC517G,A667G	41.83	2.07	1.87	9.21	38.31	6.71
1152	AGTTCATACCGCCTC	C55T,G66A,C424A,T498A	47.93	19.14	3.4	1.02	22.8	5.71
1153	AGTTCCACCTAATCT	C269T,T325A,G346T,T669C,C675T	65.78	4.21	3.86	2.46	22.98	0.71
1154	AGTTCCGTTGACTCT	T137A,G161T,T325A,C453T,A473T,G563C,C615T	54.76	11.35	2.24	1.82	29.2	0.63
1155	AGTTCGTCCCTAGGT	T218A,G245T,T267A,C320T,T325A,C521T,T562A,G664A	54.97	20.79	2.77	1.39	17.55	2.53
1156	AGTTCTATAGATTCC	T86C,T90A,G297A,G353A,C519T,C570T,A592T	1.07	20.47	0.65	0.65	74.36	2.8
1157	AGTTCTATGATGAAC	C114G,A385T,A609G	60.67	8.79	4.13	1.78	22.23	2.4
1158	AGTTCTATTTCATTT	G89A,T317C,C407T,A513G,C649T	65.7	2.91	4.62	2.48	22.07	2.23
1159	AGTTCTCGTTTTCAC	G342T,C434T,T625C	50.27	11.86	2.72	0.95	25.34	8.86
1160	AGTTCTGAAGATCAG	WT	65.57	5.42	5.61	1.54	18.38	3.48
1161	AGTTCTTATGAATCC	A416T	65.01	6.58	3.46	1.92	21.28	1.74
1162	AGTTGAATATAATTC	G80C,G366T	61.05	11.91	2.69	1.77	20.12	2.46
1163	AGTTGATGAATCGAC	T162C,A253G,GC433G,A590G,AG678A	63.04	17.08	2.01	1.52	12.68	3.67
1164	AGTTGCAAACAAGA	T39C,T610G,T650C,T655A,T704C	56.09	4.06	2.7	2.02	32.43	2.7
1165	AGTTGCATTGTGACT	C198T,C450T,G656A	74.77	1.93	4.35	1.85	15.73	1.38
1166	AGTTGCCTGGCCTTA	G537A	38.44	2.08	2.08	6.26	47.65	3.47
1167	AGTTGCTCTAAGATG	T201C,C598A	62.34	5.92	3.82	1.05	24.63	2.23
1168	AGTTGGTATCTACTG	G30A,G259A,C312T	45.9	15.66	2.98	1.91	29.92	3.62
1169	AGTTGTATACATTAG	C519T	60.69	3.16	5.18	2.19	26.23	2.54
1170	AGTTGTCGTGAAGAG	G340A,T351A,T389C	77.68	1.2	4.18	2.04	13.63	1.26
1171	AGTTTAAGAGAACAC	WT	65.08	6.38	6.38	1.75	18.15	2.26
1172	AGTTTAGATTTTGTC	G99A,T136C,C155A,C168T,T347C,T553C,G645A,A685C	75.27	3.87	3.94	1.58	12.56	2.78
1173	AGTTTATACACGGAT	A59G,T289C	17.11	55.26	1.47	0.24	23.72	2.2
1174	AGTTTCAGGTGTTTA	T545A,T557C,T632A	66.7	6.88	5.11	1.11	18.37	1.83
1175	AGTTTCATATAGAAT	G35A,G230C	48.1	13.5	4.85	0.84	31.86	0.84
1176	AGTTTCATTGCCCTC	WT	65.58	6.48	4.64	1.97	19.4	1.93
1177	AGTTTCGCTTTATCA	T162A,A513G	62.22	6.91	4.29	2.63	21.03	2.92
1178	AGTTTCTGTATTTG	T48A	62.53	7.85	5.45	1.19	20.59	2.4
1179	AGTTTGAGGGCTCGC	T509A	65.38	4.13	3.07	2.33	21.9	3.19
1180	AGTTTGGCAACCTCT	C157T,C424T	41.44	28.89	2.55	0.51	23.16	3.45
1181	AGTTTGGTAGCTGGA	C279A	59.43	8.74	6.85	1.6	20.77	2.61
1182	AGTTTGTCTACGTAT	G32A,T274C	61.44	5.96	4.9	1.82	23.36	2.51
1183	AGTTTGTGATTTTTA	G366A,G480T,A485G,C522T	47.62	26.41	3.15	1.71	19.09	2.03
1184	AGTTTTATATAACAC	T39A,T53C,G242A,T247A,G297A,C403T,T446C,T528C,T638A	NA	NA	NA	NA	NA	NA
1185	AGTTTTATTTTCGTC	T390C,T643C	77.56	2.56	5.54	1.85	11.08	1.42
1186	AGTTTTGTCTCTCAC	A88T,C150T,G234T,G651A	47.18	19.59	4.9	1.57	25.02	1.73
1187	ATAAAACAATGTAAC	WT	61.81	6.62	5.62	1.59	21.72	2.63
1188	ATAAAATATTGCTTG	C64T,C93T,G294C,A416G,A560T	46.59	15.19	3.92	1.54	31.74	1.02
1189	ATAAAATTCCAGAAT	G123A,T162C,G395C	64.85	4.39	5.2	2.3	20.65	2.62
1190	ATAAACTTTATGTTT	A232G	67.23	4.36	3.79	1.89	20.83	1.9
1191	ATAAAGCGACTAAAC	C151T,G350A,C412A,A447G,C618G,G651A,A689G	42.3	30.13	3.73	2.11	20.06	1.67
1192	ATAAAGGTATAACTT	WT	57.77	4.72	6.37	1.18	27.12	2.84
1193	ATAAATAACAAATAT	T162C,A301G	61.53	6.32	4.16	2	23.77	2.23
1194	ATAAATATGCAATTA	G391C,T420C,G444T	0.54	82.18	0.05	0.11	15.77	1.35
1195	ATAAATCATTTTGGT	T115C,G196A,A572G	65.77	4.54	4.43	2.6	21.06	1.6
1196	ATAAATGAGTTCATA	A209G,A263G,T321C,A689G	62.12	3.78	4.47	1.39	26.24	2
1197	ATAACAGAAAATTGT	A141T,A191G	62	4.85	3.57	1.28	26.65	1.64
1198	ATAACAGTATTGATT	A323T,T374A,A416T,C637T	53.13	9.53	4.68	2.3	27.97	2.4
1199	ATAACATAGGGCCC	C107T,G113C,T509A,A653G	66.16	5.38	0.77	8.46	17.69	1.54
1200	ATAACATCCGGGCG	A82T,A156C,A202T,T225C,T255A,C396T	74.93	4.48	2.83	1.58	12.53	3.65
1201	ATAACCGATGGTGTC	T327A,C360T,C367T,C552A,G664A,G691A	3.58	1.99	0	4.39	90.04	0
1202	ATAACCTGTTTGCCT	T419C,G585A	64.5	5.75	6.81	1.39	19.31	2.24
1203	ATAACCTTAAATCGT	A236T,T389C,T516A	1.75	0.17	0.17	24.17	55.17	18.56
1204	ATAACGCCACAAAAT	WT	62.23	7.67	4.74	1.72	21.48	2.16
1205	ATAACTACCCTCTTA	C345T	39.47	19.14	5.98	1.91	29.67	3.83
1206	ATAACTCTTATCTTA	WT	58.67	5.26	5.39	2.43	26.44	1.8
1207	ATAACTTGGAGACCA	A682T,T692C	17.09	0.45	0.45	19.37	61.51	1.13
1208	ATAACTTTAGGACTG	G127T,T132C,C149T,G331T,G471T	68.35	2.64	4.45	3.31	19.85	1.39
1209	ATAAGAACGACTCAG	A156G,C367T,G379T,T672A	64.84	3.6	5.45	1.84	17.03	7.24
1210	ATAAGCACTGATAAA	WT	63.1	6.29	4.98	1.87	21.88	1.87
1211	ATAAGCGTCACCGA	T173C,C646T	66.91	6.55	2.41	2.76	20	1.36
1212	ATAAGCGTGGTATCT	TG386T,A425G	41.74	20.72	3.55	1.06	30.12	2.81
1213	ATAAGGCGTCGTGTT	G563A	53.04	2.23	3.01	3.21	37.12	1.39
1214	ATAAGTCTTGATATC	C61T,G87A,C266G,A282G,G566A,T634A,C687T	3.76	43.52	5.88	0.3	39.46	7.08
1215	ATAAGTGGTGTGGA	T532C	70.11	11.2	3.34	1.53	10.91	2.91
1216	ATAAGTGTACGTGTA	G297C,C489T,A558T	0.12	88.03	0.06	0.03	11.36	0.39
1217	ATAATACGAATAATC	G106A,C155T,C248T,G629A,A685G	58.43	5.31	5.52	1.63	27.89	1.22
1218	ATAATATGAAAAAAT	TG270T,G377T,T394C,C418T,T660C,T688C	56.99	2.24	7.49	1.75	31.01	0.52
1219	ATAATCGCTAGTATA	G99A,C138T,GC395G,T440A	59.24	9.42	2.91	4.28	22.78	1.37
1220	ATAATGACACCTCCT	T661C	60.93	5.33	3.89	2.58	24.92	2.34
1221	ATAATGCGAATCGAA	T317C,C434A,G452A,C518G	38.49	0	0.42	28.45	22.18	10.46
1222	ATAATGGCGCGGTAT	T361A,G441A,TC586T	58.44	13.7	3.4	1.36	20.39	2.71
1223	ATAATTATACAGTCA	WT	59.03	6.49	5.85	1.7	25.65	1.27
1224	ATAATTCGTAATACT	WT	60.08	5.28	5.74	1.59	25.72	1.58
1225	ATAATTGCGAATAGG	T351A	74.31	1.07	4.77	2.8	15.35	1.7
1226	ATAATTTGAATAATT	G95A,A202G	55.42	6.09	7.28	2.91	26.72	1.58
1227	ATAATTTTTTACAGC	G43T,C146T,A181G,T207A,T218C,G569A,C577A,C665G	NA	NA	NA	NA	NA	NA
1228	ATACAAATAAAAATC	WT	64.16	5.99	4.52	1.21	22.37	1.76
1229	ATACAAATCCAAACT	T38G,C193T,T308C,G319A,A385G,A425T,G449T,C502T,T704C	56.35	22.64	4.88	2.12	10.91	3.09
1230	ATACAAATGGAACTC	A199T,G233C,T409G,T491C,T650A	57.33	6.22	4.09	2.75	27.6	2
1231	ATACAACAATCCTCA	A220G,C520G,T539C,T548A,G573T,GA677G	68.18	8.46	2.63	1.75	8.66	10.33
1232	ATACAAGCTAAGATG	G100T,C178T,C396T	62.08	3.85	4.95	1.65	20.33	7.15
1233	ATACAATATTATTTA	G113A,T409C,G524T,A541G	0.58	0.07	0	4.08	15.05	80.22
1234	ATACACAATCTCGTA	T302C,T325A,A443T,G629A,C652A	9.04	70.52	0.94	0.34	18.48	0.68
1235	ATACACTATACAAAC	G52A,C237T,G346A	70.36	7.04	5.27	1.5	14.08	1.75
1236	ATACACTTTAAAACT	G499A,G505T	51.92	6.12	4.69	2.26	32.27	2.74
1237	ATACATGGGTATATT	A160T,C360T,A558T,T616C,T620C	47.33	18.67	2.67	1.33	24	6.01
1238	ATACATTACTTGCTT	T137C,A523T	0.32	0.32	0	5.61	32.32	61.43
1239	ATACATTATCACCG	T413C,G629C,T631A	64.21	12.34	3.34	1.11	16.23	2.76
1240	ATACATTTCCATGAG	C512T	69.54	7.15	5.67	0.93	14.39	2.32
1241	ATACCACTCCTAGAG	C41A,G635T	61.04	6.89	5.76	1.48	22.16	2.66
1242	ATACCATTCCGTGGA	G58T,T122C,T179C,A209G,C344G	40.04	20.11	4.39	1.28	29.99	4.2
1243	ATACCCATATAATGA	C400T	64.23	6.57	4.38	2.19	18.98	3.65
1244	ATACCCATTGTCTG	TC39T,A282G	7.06	37.87	3.83	0.25	47.53	3.46
1245	ATACCTGTCTATGTG	C150T,G190A,A251T,C265T,C530T,A535T	37.5	1.29	3.88	7.33	46.12	3.87
1246	ATACGAAGACCATCT	C119T,A456T,G481A,T516C,G645A	44.91	18.31	2.91	2.13	21.9	9.84
1247	ATACGACGGCCACTT	A542T	57.4	4.93	4.07	2.45	23.97	7.19
1248	ATACGCAGCCTAAGA	WT	60.94	6.96	5.38	1.76	23.19	1.75
1249	ATACGTAATGTTATA	T179A,T241A,C273T,A358T,A368T,C376A,G377T,GC422G,A462T,G544A,T557C,T628A,C642T,A682T	35.11	32.28	0.7	0.7	26.6	4.6
1250	ATACGTGCTAGTATT	WT	60.56	6.09	5.28	1.57	24.31	2.19
1251	ATACGTTCAGGATGA	T283C,C400G,C415T,G644T	27.82	41.24	6.07	0.45	22.27	2.15
1252	ATACTATCGAAGTC	A220T,T329C,C442A	86.09	2.43	2.43	1.99	5.96	1.1
1253	ATACTCTTGTTCTTT	A438G,G574A	63.96	11.02	4.94	1.44	16.07	2.57
1254	ATACTGGGTTATACT	C61T,A105G,C185A,T247A,T317C,G381C,G564A,C567T,A678C	NA	NA	NA	NA	NA	NA
1255	ATACTTAATACATCA	T111A,C466A	34.81	28.92	3.3	0.83	30.88	1.25
1256	ATACTTCAGTTTTTA	WT	60.9	7.07	5.21	1.02	23.55	2.24
1257	ATACTTCCGGCAGGC	G233T,C393T,C589T	32.92	36.24	3.11	1.24	23.23	3.25
1258	ATACTTGATTAGAGT	G97A,C143A,T206C,G471C	47.98	21.05	3.08	1.8	23.49	2.59
1259	ATACTTTCCAGAGGT	A252T,G311A	79.73	0.95	4.72	2.99	10.24	1.37
1260	ATAGAAGCTCTAAAT	A194G,T581A	61.18	7.2	4.94	1.14	23	2.55
1261	ATAGAGACGTAGAAT	A285G	44.76	22.58	2.42	0.4	22.98	6.85
1262	ATAGAGCTCGAGTAG	G72A,T136C,T586C	65.6	8.87	3.89	1.99	17.07	2.58
1263	ATAGATATTCAGTTA	C155T	62.76	6.04	5.11	2.09	22.44	1.55
1264	ATAGCAATTCCACTG	C144T,A188T,C454T,TG459T,A663G	22.14	51.83	0.73	0	24.82	0.48
1265	ATAGCACCGTTTCTT	C266A,T516A	1.03	0.32	0.19	14.52	58.19	25.75
1266	ATAGCATGACGGTGG	G210C,C612T	57.14	2.83	3.34	1.55	33.21	1.94
1267	ATAGCATGATTTCGG	T86C,A203T,A513G	56.53	6.52	5.31	2.18	26.21	3.25
1268	ATAGCCAATAATTAT	C34T,C62T,T116G,T137C,A199T,C314T,C376A,G381T,C404T,C527T,A541C	35.96	7.35	1.32	2.62	45.14	7.61
1269	ATAGCCTGGGGACT	G319A,A572T,C611T,T658C,C684A	73.57	6.66	3.17	1.99	12.87	1.73
1270	ATAGCCTTATGTTCT	WT	56.93	6.1	6.39	1.64	27.3	1.64
1271	ATAGCGTGCATTTGG	WT	65.91	5.82	4.72	1.7	19.78	2.08
1272	ATAGCTCAAAGTTTT	G348A,A408C,A513G,A594G,G644T	43.66	0.77	3.14	5.29	30.29	16.86
1273	ATAGCTTCAACATGA	A438G,T440G,G561C,C637T,G683A	57.64	12.78	3.65	1.29	23.12	1.52
1274	ATAGGCAGACATTCT	T186A	64.34	4.97	4.97	2.02	22.43	1.27
1275	ATAGGCGTGCTCGCT	A83T	64.01	5.39	4.62	1.89	22.5	1.58
1276	ATAGGGTGTAGATTA	A492T	64.97	6.55	5.01	2.07	19.28	2.12
1277	ATAGGTAACTGTATA	WT	61.69	6.36	6.03	1.92	21.84	2.16
1278	ATAGGTGCCAAGCTC	G259A,C278T,T300C	NA	NA	NA	NA	NA	NA
1279	ATAGGTGTTTATCCG	G49A,T108A,C142G,T249C,C369G,A641G	64.26	8.25	4.07	1.16	19.99	2.26
1280	ATAGTAAGATTATCG	A118T,GC433G	56.08	8.27	3.36	2.58	28.17	1.53
1281	ATAGTACAGTTTTAC	C93A,T446C,C503T	0	70.53	0	0	25.61	3.86
1282	ATAGTACGGTGAACG	C94T,G264T,T308A,T354A,C404T,G471A,T638A	65.28	1.39	2.79	5.06	24.23	1.24
1283	ATAGTACTCCAATAA	G379A,C397A,C642A	81.91	0.17	6.29	3.19	7.32	1.12
1284	ATAGTAGATATAAGT	T111C,T137C,G229A	44.68	12.23	6.55	0.58	34.21	1.75
1285	ATAGTCCCGGGTTCG	C144T,G210C,T302A,T329A,C463T,T491A,C552A	71.73	0.74	4.42	1.97	20.15	1
1286	ATAGTCGGTTAAAAC	C571A	64.65	5.99	4.95	2.01	20.59	1.8
1287	ATAGTCTATTAACAG	C55T,G81A,C114T,A253T,G417A,G449A,A494G	17.47	61.71	1.16	0.77	16.36	2.52
1288	ATAGTGCACACTTCA	G104A,A199G,T200C,T701C	66.97	4.59	5.04	0.68	21.56	1.16
1289	ATAGTGGGGATAGTT	A45T,C55A,A105C,T321A,A408T,T562A,T613A,A663G	44.07	8.59	6.55	1.47	35.93	3.39
1290	ATAGTGGTCTATTTA	WT	59.05	5.97	4.43	1.54	27.14	1.87
1291	ATAGTGGTTTTAGAA	C265T,T608C	58.98	5.04	5.55	1.73	26.06	2.64
1292	ATAGTTTGTTGGCAC	C142T,C286T,A523G	0.33	0	0	15.07	44.7	39.9
1293	ATATAAACCAGAGCA	T115A,A253T,G313A,A371T,C400A	45.16	14.6	4.92	1.02	31.07	3.23
1294	ATATAAAGAATAACG	C591T,A681G	53.35	3.47	3.23	3.23	33.75	2.97
1295	ATATAACGGGCTTCC	A383G	66.57	5.71	5.26	1.56	19.88	1.01
1296	ATATAACTTGGCGAT	A44T,T108G,C139A,T308C	68.69	0.98	6.52	3.42	19.08	1.3
1297	ATATAATTACGTTGT	G271A	82.48	1.89	3.5	2.7	9.16	0.27
1298	ATATACACGGCATGT	C34T,T70G,A236T,A252G,T289C,C345T,G379T,A477T,G544A,C615T,G626A,T628C,A663T	11.93	8.26	0	0.92	74.32	4.58
1299	ATATACGCATTTATG	T29C,G243T,G484A,C497T	52.42	2.51	3.29	4.84	31.14	5.8
1300	ATATACGTAGCTCGA	WT	62.13	7.05	4.62	1.32	22.84	2.04
1301	ATATACTCACTTATC	WT	53.27	5.22	5.68	2.75	31.47	1.61
1302	ATATATGATCGAAAG	WT	59.76	7.17	6.37	2.39	22.31	2
1303	ATATATGATTCATCT	TG469T,A474T,T516C	48.63	7.32	2.74	2.19	34.55	4.56
1304	ATATATGGTTAAAAT	T621C	64.97	5.09	4.85	1.68	21.62	1.8
1305	ATATATTACGTGATA	G427C,C458T,A535G	59.81	5.99	5.78	2.01	24.67	1.74
1306	ATATATTGTGCAATG	WT	61.74	7.35	4.73	1.69	22.76	1.74
1307	ATATATTTTAACCTT	G76A,C478T	60.56	5.49	4.29	2.4	24.98	2.28
1308	ATATCAATCTACTTT	WT	55.38	7.25	5.58	3.16	26.76	1.87
1309	ATATCACGATTATTG	A156G	60.14	7.77	5.26	2.14	22.52	2.18
1310	ATATCATCTGCCCAT	A641G,A653G	20.33	0.84	0.42	17.61	60.17	0.63
1311	ATATCATTTACTCTT	T491A	63.21	5.25	4.85	0.94	24.26	1.48
1312	ATATCTCACCTAGAA	A78T,G349A,GC402G,A641G,T697C	76.48	0.38	4.52	3.6	12.81	2.21
1313	ATATCTCTGGTCCTT	A59G,C110T,G127T,A246G,A338G,C339T,T465A,C630T,T634C	3.28	73.4	0.49	0.16	19.21	3.45
1314	ATATCTGTGCGCTAT	G305A,C521T,A542G,G693A	71.94	1.76	3.66	5.16	15.07	2.41
1315	ATATCTTCGTCCTTA	A78T,C92T,A236T,T270C,C591T	68.49	2.75	2.75	1.81	22.72	1.48
1316	ATATCTTTTCGATGA	T216C,T293C,A416G	62.35	8.82	6.47	0	21.18	1.18
1317	ATATGAGCGTATTAA	T70C,A160C,A232T,G330A	59.18	3.73	5.6	1.34	26.82	3.33
1318	ATATGCCCATTTCTT	G30A,G99A,T186A,A213G,T390C,T413C,T429A,A689T	68.41	4.07	3.35	0.72	22.49	0.96
1319	ATATGCGTTTGATAT	G470T,T532C,C591G	53.45	10.16	5	1.29	23.39	6.71
1320	ATATGCTCATTTTTC	T39A,G313A,G568T	38.37	22.7	5.68	1.08	30.54	1.62
1321	ATATGGAAATCTATT	A166G,T303C,G359A,G644T,T697A	69.07	3.11	6.82	2.85	16.11	2.03
1322	ATATGGATCCTAATT	C464A,C618T	60.78	8.17	6.69	0.8	20.62	2.94
1323	ATATGGGTATGAAGA	C158A,G313A,G635A	41.06	17.39	5.18	1.36	30.95	4.07
1324	ATATGTGGCAACGTT	C154A,G391A,T509C,C615G,G617A	42.97	14.52	3.63	1.76	31.62	5.51
1325	ATATGTTCAAATTAT	A371T,G496C,G614A	50.47	9.84	5.4	1.27	29.21	3.81
1326	ATATGTTCTTTATGT	AC59A,A203G,T650A	46.59	4.83	6.82	2.27	38.07	1.41
1327	ATATTAAATTGTTAG	C92A,C455T,A506T,CT603C,C687G	1.44	63.9	0	6.14	25.27	3.25
1328	ATATTAAGCGCGGCC	C312A,A535T,T634A	56.05	4.8	4.31	2.46	28.7	3.68
1329	ATATTAGGTGTGTTT	AC59A,C567T	52.6	4.84	5.22	3.55	32.14	1.64
1330	ATATTCCTGAATACC	G471T	47.27	15.68	2.14	1.66	31.11	2.14
1331	ATATTCGTGTAATAT	T401A,GC402G,G414A,T692G,T704G	8.14	0.23	0	17.44	72.33	1.86
1332	ATATTCTCATGTCTC	T509C	58.55	5.3	4.36	2.27	25.93	3.59
1333	ATATTCTGCACTTGA	T162C,G348T,G537A	44.8	0.45	1.92	9.28	40.5	3.04
1334	ATATTGTAATTATTA	G79A,G89A,G163A,G234T,T302C,C435A,G441A,T655A	73.53	0.62	3.01	3.63	17.34	1.87
1335	ATATTTCCTGCGACA	A232T,G331A,T354A,C511T,C652T	85.36	0.27	3.59	2.43	6.86	1.49
1336	ATATTTCGAAGTACG	CT114C,T140A,T351C,T553C,T621A	70.81	3.55	5.06	1.4	17	2.18
1337	ATATTTGAAAATAGA	G106C,C412T,A653G,T666A	50.97	14.14	3.89	1.2	26.69	3.1
1338	ATATTTGGTAGTCCG	G76A,G123T,G318A	60.84	11.24	3.81	1.42	19.78	2.9
1339	ATATTTTTTCACAAG	A78G,T341C	71	1.82	4.69	2.01	18.68	1.79
1340	ATCAAAAACTGTACC	T38C,C55A,C320T,C406T	29.52	16.25	7.67	1.43	42.39	2.73
1341	ATCAAAATTTGGACC	C197T,C248T,C344T,T351C,T604A	61.85	5.16	5.91	1.54	23.37	2.17
1342	ATCAAAGCTCTTACC	WT	58.01	6.59	5.03	2.17	26.23	1.97
1343	ATCAAAGGACTTACA	A301G,G559T	57.5	6.67	5.55	3.33	24.17	2.79
1344	ATCAACAGTGAGTCT	T565C,C665A	63.43	8.49	4.82	1.54	19.24	2.48
1345	ATCAACGCTGTCGCC	A663T	66.48	4.56	3.39	2.73	21.23	1.61
1346	ATCAACTAAATTTAA	A232T,G636A,T655C,T669A	62.19	7.02	8.2	1.25	18.97	2.36
1347	ATCAAGACACTCTGT	A181T	53.48	6.25	4.07	0.87	32.55	2.78
1348	ATCAAGCCATTAACG	C33T,T498A,T504C,G575A	4.99	0.4	0.6	11.88	42.65	39.46
1349	ATCAATAAGCGACGT	A383G,A443G,C567T,G686C	NA	NA	NA	NA	NA	NA
1350	ATCAATCCTCATCCG	WT	62.23	6.26	5.94	1.7	21.96	1.9
1351	ATCAATCGCGTACAT	T130C	73.26	6.19	3.17	1.3	13.68	2.39
1352	ATCAATTGGGTTGGA	WT	65.2	5.67	5.56	1.59	19.5	2.48
1353	ATCAATTTTAATTGG	T440C,T655C,TG669T	75.26	8.95	4.21	1.05	8.95	1.58
1354	ATCACAACGCCTTCG	T84A,CG376C,C411T,C598G	66.84	0.28	4.06	3.64	23.78	1.4
1355	ATCACAGATATCCAT	C159T,C344T,C502T,C577T,G599A,G683C	61	4.19	4.19	2.36	27.22	1.04
1356	ATCACAGTACTTTGC	C295G,A385G,A609T,T634A	0.27	81.82	0	0.18	16.91	0.82
1357	ATCACATAACAGCTA	WT	63.26	5.1	4.85	1.89	22.27	2.62
1358	ATCACATTCTATGCT	C55T,A194T,A365T,T419A,T509A	46.61	6.85	3.43	2.74	36.94	3.43
1359	ATCACCTGTGCCCTC	T116C,T130C,T293C,C314A,T429A,C552T,C567T,C612G	31.94	1.39	2.08	13.89	49.31	1.38
1360	ATCACTCATCGATTG	WT	63.96	6.75	4.72	1.48	21.29	1.8
1361	ATCACTCGCAGTTTA	WT	57.54	6.98	5.21	1.93	26.54	1.79
1362	ATCACTCTTTATTAC	A181G,C436T,A494T,C530G	27.16	0	0.66	12.58	47.03	12.57
1363	ATCACTTATGTAAGG	G51A,A202G,G230A,G313A	22.91	23.61	4.3	0.42	46.39	2.37
1364	ATCAGAAACTTACGA	G271T,G348T	73.37	0.72	6.18	2.09	16.46	1.17
1365	ATCAGACATAATACA	G128A	65.18	5.41	4.94	2.47	20	1.99
1366	ATCAGCCTTTCATTA	A118G,T174A,C288T,T504A,T650C	7.31	0.88	0.29	28.36	59.95	3.21
1367	ATCAGCTCCAATAGA	C262A,TG329T	77.53	0.62	4.99	3	12.23	1.62
1368	ATCAGGCTTTATAGT	T186C	61.44	6.36	4.66	1.69	23.31	2.54
1369	ATCAGGTTATCCTTT	G32T,G163A	61.09	6.07	5.32	1.53	23.6	2.39
1370	ATCAGTAATTACAAA	G32A,T130C,A213G,T240C,A268G,T432A,T446A,C515T,G566T,T666C	0.23	90.31	0	0.09	8.27	1.09
1371	ATCAGTCGTTGATCC	G260A,A263G,A299T,T386C,A506T	3.22	22.24	0	21.14	42.1	11.29
1372	ATCAGTCTTCACCCG	C197T,G529C	73.11	5.92	3.54	1.56	14.33	1.55
1373	ATCAGTTCTGCGTTA	T389A,G448T,A560G,G564A,TG669T,G674T	35.62	0.78	1.34	2.11	12.69	47.46
1374	ATCATACCCATCACG	WT	62.7	6.3	5.39	1.67	21.79	2.15
1375	ATCATATTTAAACAC	TG308T,T565A,A578T	71.33	0.92	5.85	3.83	17.07	0.99
1376	ATCATCATATACCTG	C151T,T179A,A232G,C415T,T528A	23.68	19.94	1.87	0.62	50.15	3.74
1377	ATCATGTATATTGTC	A147G,A199G,T335C,G479A,G614A,T621A	48.73	10.36	2.38	2.24	34.59	1.68
1378	ATCATGTCTCAACGG	T315C,A425C,C522T,G629C,T666A	71.53	2.61	6.58	1.8	16.48	0.99
1379	ATCATGTTGTAGTGA	A256T,G402A,T509A,G510T,C512A,C571A,G639C,A653T,T661A,A694T	63.76	3.05	1.72	4.63	25.92	0.92
1380	ATCATTAAAATCCCA	T394C	69.23	1.71	5.81	2.56	20.26	0.43
1381	ATCATTAATTACATT	A44G,T255A	65.83	5.69	4.16	2.69	20.31	1.31
1382	ATCATTACAACCGAT	T153A,T162A,G235A,C339A,G657A	12.88	61.12	2.14	0.36	21.3	2.2
1383	ATCATTATTGATCGT	A44G,C197A,G284A,C367T	57.65	9.21	5.51	1.49	23.92	2.21
1384	ATCCAGAAAAATGAT	G192A	61.93	6.61	5.23	1.3	22.74	2.19
1385	ATCCAGCTAGGCTAC	T218A,T439C	61.96	8.53	4.6	1.65	22.05	1.21
1386	ATCCATATAGAAGTT	T53C,TC137T,T173A	61.35	7.62	5.11	1.54	22.12	2.26
1387	ATCCATCGTGCGCTA	T325A,T465C	49.64	21.77	2.4	1.53	22.53	2.13
1388	ATCCCAGACTTCATG	G189T,T361C,A558T,G639A,A678T	60.82	10.82	4.97	1.17	17.54	4.68
1389	ATCCCCATGAATTCT	A232T,G370T	33.51	33.06	3.93	0.68	25.87	2.95
1390	ATCCCCTAAATGATC	C397A,A447T	11.04	61.45	0.54	0.27	17.44	9.26
1391	ATCCCTCGATCCTAG	T130A,A182G,A492T	NA	NA	NA	NA	NA	NA
1392	ATCCGAGCCGTTGAT	G569A	68.33	8.25	4.24	1.05	16.17	1.95
1393	ATCCGAGGATTTCAG	G395C,A443T,C511T	11.49	81.93	0.7	0.04	4.94	0.9
1394	ATCCGGAAAAATTTA	T274C,T347C,T446C,C577T,TG655T	0.21	78.36	0	0.42	19.96	1.05
1395	ATCCGGTGAGATATC	C675T,T697C	60.99	6.33	3.37	3.57	23.17	2.58
1396	ATCCGTGTATACTGC	A667G,T669A,A694G	21.9	0.38	0.38	13.91	62.67	0.76
1397	ATCCGTGTTGCATTT	C453T,G488A,C514T,A547C,T601A,G647T	63.33	8.74	4.91	1.02	20.87	1.13
1398	ATCCTAATAGGATCA	G109T,A118T,A152T,T153A,A383G,A425G,G470A,A523G,A541G	0.45	0	0	4.26	84.98	10.31
1399	ATCCTATAAATATTG	A513T,TG553T	70.14	9.9	5.07	0.88	12	2
1400	ATCCTGAATGGGTAG	C376A,A447G	2.73	78.77	0.39	0.29	15.93	1.88
1401	ATCCTTCATCAAAAT	T29C,T179C,A220T,A252G,C600A	42.02	23.94	3.26	0.81	26.06	3.92
1402	ATCCTTTGGAAATCG	WT	62.47	6.41	5.42	1.64	21.9	2.15
1403	ATCCTTTGTGGCGTA	A147G,G626A	61.58	5.8	4.31	1.93	23.87	2.51
1404	ATCGAACATTTACGC	A47T,T53A,A118T,C193T,G284T,G651C	71.09	3.97	3.97	2.83	15.69	2.46
1405	ATCGACAGGATTTTA	A296T,C312T,C405A,G433T,T446A,A451G,T516C,T528C,G555T	0.25	73.33	0.08	0.17	12.88	13.28
1406	ATCGACTTTTTTTTA	A558G	66.18	6.31	4.61	1.7	19.4	1.81
1407	ATCGATACCGTAACA	G326A,T631A	61.11	9.17	5.14	0.91	22.02	1.65
1408	ATCGATATCGGTACA	T333A	76.71	1.68	4.17	2.68	13.55	1.21
1409	ATCGATCTTTGACTC	T274A,C423T,T465A,T557C,T696C	51.57	12.61	0.86	2.87	27.22	4.87
1410	ATCGCACGTCCTATG	WT	62.26	7.19	5.08	1.69	21.24	2.54
1411	ATCGCACTAATTACA	C107T,G229T,C415T,C454A,C552A,A580G	11.66	17.59	0.2	0.79	69.16	0.6
1412	ATCGCACTGATCATT	G80A,A152G,A177G,T247C,A365T,A451T	64.23	9.7	3.64	1.82	18.18	2.43
1413	ATCGCAGCCTCCAAC	T293C,C400T,G569A,T620A,A685G	69.76	4.51	6.6	1.01	15.98	2.14
1414	ATCGCATCTTGCCTT	WT	64.69	6.18	4.48	1.53	21.18	1.93
1415	ATCGCCTGTCTTCGA	A323T,T413C	56.79	10.79	4.96	1.83	23.52	2.11
1416	ATCGCGCGACATCGA	AG96A,T267C,G313C,A358G,C468A,T621G,A689T	1.54	82.55	0.5	0.06	12.14	3.21
1417	ATCGCTGCATGCTTT	A65G,G75A,G163A,A232T,T249C,G275A,G402A	61.89	6.23	6.4	1.52	20.71	3.25
1418	ATCGGCAGATAGTAG	G113A,T130C,A166G,T432C,A451T,G531A	76.84	3.52	2.59	2.5	12.59	1.95
1419	ATCGGCTGGAATTTA	G95A,A105T,C114T,T115A,T126A,A177T,G250A,C320T,T329A,T347C,A425G,C434T,C453T,C467G,G481T,T498A,G537C,C612A	1.79	49.4	0	1.79	44.64	2.39
1420	ATCGGGCATTCCTGG	A65G,T86C,A166T,G222T,A252G,G272A,A323G,T631A	62.58	5.54	6.54	2.18	21.14	2.02
1421	ATCGGGTCTTACAAT	C121T,C164T,C336T,T613C	21.94	38.17	3.13	0.43	34.33	1.99
1422	ATCGGGTTTTGAATC	G316A	56.26	13.59	4.4	1.06	22.02	2.67
1423	ATCGGTAGTGCGGGT	AG65A,G172A,G362A,C424T,G569A	29.97	45.32	2.48	1.2	17.58	3.44
1424	ATCGGTGCTGTATTT	T31C,C85A,C148T,A251T,C375T,G457A,T643C	57.92	11.16	5.73	1.01	20.68	3.49
1425	ATCGTAGGTGCTGAC	G350A,C364T,G593A	79.64	0.58	3.56	3.23	11.42	1.57
1426	ATCGTCAACTCACAG	T303A,G488A	69.43	2.34	3.65	3.14	17.47	3.96
1427	ATCGTCTAGGTTTAG	G79A,A256G,A263G	70.32	4.01	4.92	1.64	17.31	1.82
1428	ATCGTCTGGTCCATT	G134A,G677T	66.43	4.59	3.79	2.89	20.05	2.24
1429	ATCGTGAAGATTACA	WT	63.1	6.74	4.77	1.45	21.96	1.98
1430	ATCGTGGGGTCCCGA	C77T,G635A	66.7	3.32	4.62	1.94	21.49	1.93
1431	ATCGTGGGTCGAATT	C375T	55.04	13.77	4.08	1.99	22.11	3.02
1432	ATCGTGGTCATTTAC	A65T,C139A,A343T,G488T,G524T,T631C,G639A,C642A,A648T	0.26	0.15	0.1	2.71	11.95	84.82
1433	ATCGTGTGATAATGA	T283C,G690T	61.37	5.38	2.53	1.73	26.26	2.72
1434	ATCGTTAACTGCCGG	G366A,T553A,G575A	56.32	11.1	4.55	1.21	23.42	3.39
1435	ATCGTTACTAACTTG	C93T,C450T	69.47	3.32	5.32	2.44	17.98	1.47
1436	ATCGTTCCCAAGATT	A65G,A147T,A199G,A296G,C307T,C450A,G568T,C662T	0.71	61.83	0.18	0.18	34.27	2.82
1437	ATCGTTCGACGGGTC	C148T	67.81	5.77	4.57	1.47	18.38	2
1438	ATCGTTGATGACTTT	G30A,C55A,C397A,A494T	69.09	1.69	4.87	1.48	20.96	1.91
1439	ATCGTTGGAAGAGAC	T48A,G52A,T153A,G595T	58.81	9.46	5.19	1.51	22.36	2.66
1440	ATCGTTTAACAGAGA	C93A,T162A,G230A,G239C,A296T,G353A,G479T	0.28	71.49	0	0	26.74	1.49
1441	ATCGTTTCTCTTAAT	G215A,C286T,G306C,T335A,A343G,T373C,A609G,T643A,T704C	43.46	3.53	4.24	0	43.81	4.96
1442	ATCTAAAAATAACTA	C36T,A383C,C478T,T526C,TG655T	54.67	5.41	1.87	4.78	27.85	5.42
1443	ATCTAATGAGTCGGA	T140A,T491C,C615T,G693A	54.87	4.07	4.89	2.56	31.62	2
1444	ATCTACATCTATTAG	T31C,G227A	55.92	7.83	6.39	1.43	26.11	2.31
1445	ATCTACTGATAGATC	G67T,G113T,C364T,T465C,T620A	33.21	42.1	2.75	0.96	18.55	2.42
1446	ATCTCACTGGGAGTG	WT	65.1	5.02	4.19	2.19	21.24	2.26
1447	ATCTCCTTAATTCTA	C92T,C406T,T643C	61.11	5.94	5.44	2.04	22.1	3.38
1448	ATCTCCTTAGGGTTG	G100A,A209G,A338T,G639A	61.45	5.97	6.9	1.3	21.64	2.73
1449	ATCTCCTTTATTATG	G433A	58.08	6.02	5.35	1.58	25.64	3.33
1450	ATCTCGAAGGAGCAA	T117C,G258A	56.24	11.28	6	1.37	22.61	2.49
1451	ATCTCTATCTAGGAGT	G35A,T38C,T270C,T347C,C602T	76.7	2.73	4.99	2.4	11.91	1.28
1452	ATCTGAACAACTTGG	T117C,A282C,C411T	32.17	11.4	4.18	0.68	45.03	6.53
1453	ATCTGAGCTTCATTA	T74A,G97A,G372A,G414A,T565A	53.23	12.36	5.09	1.61	22.78	4.92
1454	ATCTGATAACCATAA	A451T,C502A,G540A	66.97	1.77	4.58	2.85	21.25	2.58
1455	ATCTGATAGCGTACA	A78G,G353C,T440A,A594G,T632A	48.89	0.34	1.02	6.28	43.12	0.34
1456	ATCTGATTTCTCATA	WT	60.88	6.06	4.87	1.57	24.76	1.86
1457	ATCTGGCCTGCCTAT	G461A,C551T,G569A,G573T,A663G	45.54	31.13	3.08	1	12.24	7
1458	ATCTGGTTCGTTTGT	A203T	67.18	6.24	4.36	0.87	19.8	1.55
1459	ATCTGTATTTTTAAA	T557C	59.8	7.24	6.97	1.47	20.91	3.61
1460	ATCTGTTCCAATCCC	WT	65	7.2	5.49	0.85	19.63	1.83
1461	ATCTGTTTTAAATTA	A45T	56.63	6.38	6.13	2.21	27.21	1.45
1462	ATCTTACACATAGTA	A252G,T335C,G422A,T601C,A653T	51.38	5.85	4	1.85	27.07	9.85
1463	ATCTTACCCTCCACG	WT	62.82	5.48	5.14	2.28	22.12	2.16
1464	ATCTTACTTACTGTA	G318A,T516G,C571T	9.95	1.46	0.24	9.95	77.2	1.21
1465	ATCTTATCAATAAGC	A59T,T329C,A641T	71.75	1.2	5.14	3.67	16.35	1.88
1466	ATCTTATCTTCCATA	G123A,A188G,A191G,T419A	56.61	0.75	6.42	3.02	30.94	2.26
1467	ATCTTATTTGATGGT	C55T,A101G,C125A,A152G,T179A,A232T,A323T,C364T,T601A,G614A	26.15	13.28	4.15	0	53.95	2.47
1468	ATCTTCCTGTGTCCT	WT	69.56	6.05	3.82	1.38	18.24	0.95
[truncated: 4,323 more rows]

## Sheet: MCF7 ctrl rep1
ID	barcode	mutations	AE inclusion (%)	AE skipping (%)	first IR (%)	second IR (%)	full IR (%)	other (%)
[truncated: 5,791 more rows]

[truncated: 5 more sheets: MCF7 ctrl rep2, MCF7 ctrl rep3, MCF7 KD rep1, MCF7 KD rep2, MCF7 KD rep3]
