# Supplementary material for: Decoding a cancer-relevant splicing decision in the RON proto-oncogene using high-throughput mutagenesis
Source: Nat Commun. 2018 Aug 17;9:3315. doi: 10.1038/s41467-018-05748-7 (PMC6098099; doi:10.1038/s41467-018-05748-7)
Supplement: Supplementary file 6 — Supplementary Data 3 [file 41467_2018_5748_MOESM6_ESM.xlsx]

## Sheet: Supplementary Data 3
Supplementary Data 3: Single mutation effects and synergistic interactions between HNRNPH knockdown and point mutations inferred by the mathematical splicing model.

## Sheet: HEK293T rep1
mutation	mutation type	genomic position	AE inclusion (%)	AE skipping (%)	full IR (%)	first IR (%)	second IR (%)	other (%)
wt mean	-	-	58.91	11.69	20.68	4	1.88	2.45
wt SD	-	-	2.82	1.32	2.72	0.74	0.39	0.49
A26T	SNV	chr3:49933812	58.0761	11.3565	22.3615	4.3564	1.8593	1.9901
A26G	SNV	chr3:49933812	53.8622	10.8989	27.4122	3.3181	1.9474	2.5612
G27T	SNV	chr3:49933811	56.8023	16.9389	17.4595	3.1771	2.0196	3.6026
G27C	SNV	chr3:49933811	58.1514	13.8341	20.9571	1.7897	1.6624	3.6054
G27A	SNV	chr3:49933811	52.8368	11.2988	26.722	4.6529	1.9697	2.5198
C28T	SNV	chr3:49933810	59.6069	9.8338	22.336	4.1603	1.8056	2.2573
C28G	SNV	chr3:49933810	46.1437	19.8769	23.3153	8.4701	0.4941	1.6999
C28A	SNV	chr3:49933810	55.8458	13.7049	23.5488	2.0526	2.0222	2.8257
T29G	SNV	chr3:49933809	57.8095	14.0155	20.1442	3.7815	1.7172	2.5321
T29C	SNV	chr3:49933809	59.3009	11.7486	21.2202	3.4109	1.9068	2.4126
T29A	SNV	chr3:49933809	53.5641	11.1193	26.1879	4.5766	2.2134	2.3388
G30T	SNV	chr3:49933808	56.3417	9.0162	24.7111	1.8721	1.1036	6.9552
G30A	SNV	chr3:49933808	57.4995	11.5536	21.9725	4.5658	1.708	2.7006
T31G	SNV	chr3:49933807	60.0156	12.0304	20.4738	3.6649	1.3734	2.4418
T31C	SNV	chr3:49933807	60.1499	10.9167	20.5571	3.916	2.0142	2.4461
T31A	SNV	chr3:49933807	57.6336	11.5363	23.329	3.4151	1.9725	2.1135
G32T	SNV	chr3:49933806	58.0349	10.7894	22.6841	3.9923	2.3137	2.1857
G32C	SNV	chr3:49933806	39.5641	18.5658	32.2269	5.5471	1.8203	2.2758
G32A	SNV	chr3:49933806	54.6695	12.8725	23.8386	3.6934	2.2696	2.6563
C33T	SNV	chr3:49933805	61.0983	12.5758	18.4864	3.8625	1.6379	2.339
C33G	SNV	chr3:49933805	51.1034	20.2937	22.2585	0.5283	2.4664	3.3497
C33A	SNV	chr3:49933805	71.3414	7.2273	14.163	3.598	2.0719	1.5984
C34T	SNV	chr3:49933804	52.782	11.4996	27.5079	3.7202	1.7003	2.7899
C34A	SNV	chr3:49933804	58.9698	7.9738	22.5558	5.8225	1.7864	2.8917
G35T	SNV	chr3:49933803	54.6278	9.9401	24.5886	6.1647	2.1752	2.5036
G35A	SNV	chr3:49933803	58.7146	10.2082	22.2174	4.4289	1.8936	2.5373
C36T	SNV	chr3:49933802	64.8597	9.2618	17.4505	4.2344	1.6029	2.5907
C36G	SNV	chr3:49933802	50.0586	13.5286	25.3821	4.5871	2.247	4.1965
C36A	SNV	chr3:49933802	62.05	13.8658	16.7353	3.4646	1.6547	2.2297
C37T	SNV	chr3:49933801	59.1952	11.9505	20.934	3.7685	1.9418	2.21
C37A	SNV	chr3:49933801	55.6198	10.8617	24.7652	5.0814	1.712	1.96
CT38C	DEL	chr3:49933801	57.9035	11.7265	20.8424	5.3247	1.6686	2.5344
T38G	SNV	chr3:49933800	55.8135	15.5589	21.1747	2.8762	1.6739	2.9029
T38C	SNV	chr3:49933800	57.107	11.4423	23.337	4.2837	1.791	2.039
T38A	SNV	chr3:49933800	60.6637	11.576	18.9746	3.9664	2.1905	2.6287
T39C	SNV	chr3:49933799	58.2761	12.021	21.8557	4.0987	1.6546	2.0938
T39A	SNV	chr3:49933799	55.7771	15.2922	21.4693	3.0123	1.83	2.619
TC40T	DEL	chr3:49933799	55.4399	13.5288	21.6677	4.5828	2.9301	1.8507
C40T	SNV	chr3:49933798	47.3309	12.1895	30.9082	5.0075	2.2345	2.3294
C40A	SNV	chr3:49933798	43.4958	25.3604	23.4972	3.3564	1.1623	3.128
C41T	SNV	chr3:49933797	58.2512	12.6889	20.6153	4.8823	1.4494	2.1128
C41G	SNV	chr3:49933797	59.5481	13.6279	20.4936	1.8671	1.4263	3.037
C41A	SNV	chr3:49933797	57.8	11.4867	21.3823	4.376	2.2686	2.6865
T42G	SNV	chr3:49933796	61.2643	10.6416	20.2216	3.1317	2.3081	2.4327
T42C	SNV	chr3:49933796	60.3888	10.204	21.1418	3.167	2.0378	3.0607
T42A	SNV	chr3:49933796	61.8132	9.87	19.6542	4.754	1.2336	2.675
G43T	SNV	chr3:49933795	43.2239	10.3479	38.6076	2.0176	3.2013	2.6017
G43C	SNV	chr3:49933795	55.916	11.8321	23.8221	4.7468	1.701	1.9819
G43A	SNV	chr3:49933795	57.6477	11.8808	21.717	4.5465	1.9668	2.2412
A44T	SNV	chr3:49933794	52.5194	9.595	26.806	6.2695	2.2087	2.6014
A44G	SNV	chr3:49933794	54.3588	12.4151	23.5306	5.2429	2.3226	2.13
A44C	SNV	chr3:49933794	49.859	13.8112	29.181	4.3873	0.7986	1.963
A45T	SNV	chr3:49933793	60.727	10.2102	20.9498	4.1817	1.6779	2.2533
A45G	SNV	chr3:49933793	59.3568	10.0849	23.098	3.5636	1.953	1.9437
T46G	SNV	chr3:49933792	62.426	14.7684	15.0662	3.2048	1.5622	2.9724
T46C	SNV	chr3:49933792	56.2218	13.4338	22.6453	3.435	2.3144	1.9497
T46A	SNV	chr3:49933792	60.1725	11.3726	19.1709	4.5277	1.7778	2.9786
A47T	SNV	chr3:49933791	53.7399	16.3477	21.4804	4.4785	1.5048	2.4487
A47G	SNV	chr3:49933791	56.0275	14.3913	20.2564	5.2473	1.8818	2.1956
T48G	SNV	chr3:49933790	78.134	1.6058	13.1476	4.9522	1.6479	0.5125
T48C	SNV	chr3:49933790	57.5551	14.0681	19.3303	4.4925	2.2002	2.3539
T48A	SNV	chr3:49933790	54.215	11.5067	25.7626	3.2204	2.6346	2.6608
G49C	SNV	chr3:49933789	72.8895	7.5381	14.8291	1.865	0.8673	2.0111
G49A	SNV	chr3:49933789	66.0348	11.0795	16.5923	2.9156	1.3411	2.0367
T50G	SNV	chr3:49933788	61.204	6.9001	24.0738	3.8438	1.3817	2.5966
T50C	SNV	chr3:49933788	59.5167	11.8173	19.8818	4.2342	1.9945	2.5555
T50A	SNV	chr3:49933788	61.7442	11.6921	18.3121	4.5313	1.6759	2.0444
TG51T	DEL	chr3:49933788	53.4392	9.7233	27.8127	4.1967	2.8688	1.9593
G51T	SNV	chr3:49933787	59.5266	8.0247	21.5622	5.6619	1.898	3.3266
G51A	SNV	chr3:49933787	61.8778	9.5365	21.16	3.0173	1.5139	2.8944
G52T	SNV	chr3:49933786	61.8861	9.8307	18.9803	4.8165	1.8016	2.6848
G52C	SNV	chr3:49933786	58.4483	12.3735	21.108	3.7132	1.9857	2.3713
G52A	SNV	chr3:49933786	58.5704	14.275	19.1164	3.1781	1.5924	3.2677
T53G	SNV	chr3:49933785	57.2174	9.1971	24.4437	6.194	1.4893	1.4585
T53C	SNV	chr3:49933785	58.9191	11.7238	21.7344	4.0419	1.2151	2.3656
T53A	SNV	chr3:49933785	62.2869	11.0314	16.8263	5.0275	2.1007	2.7272
C54T	SNV	chr3:49933784	59.2338	11.2063	20.5858	4.5909	2.5095	1.8737
C54G	SNV	chr3:49933784	53.1094	21.9312	17.3196	3.7925	1.6793	2.168
C54A	SNV	chr3:49933784	59.1249	7.0951	25.5509	5.6534	1.4878	1.088
C55T	SNV	chr3:49933783	57.0443	11.4849	22.434	4.9144	1.8431	2.2794
C55G	SNV	chr3:49933783	63.1933	9.9756	17.2613	5.9935	2.2739	1.3024
C55A	SNV	chr3:49933783	56.3219	9.9372	23.9446	5.4584	1.9426	2.3954
G56T	SNV	chr3:49933782	52.5776	20.4594	17.0107	4.9383	1.4706	3.5433
G56C	SNV	chr3:49933782	52.2333	10.2428	22.4898	9.6934	2.6466	2.6941
G56A	SNV	chr3:49933782	57.4521	11.9304	22.1607	3.9803	2.1487	2.3279
GA57G	DEL	chr3:49933782	61.8148	12.7169	15.7212	3.8617	2.2428	3.6426
A57T	SNV	chr3:49933781	61.1735	11.0346	18.7191	5.0306	1.4231	2.6191
A57G	SNV	chr3:49933781	61.1669	7.002	21.6621	5.1725	2.4812	2.5154
G58T	SNV	chr3:49933780	49.5462	17.4892	22.8701	5.45	2.4517	2.1928
G58A	SNV	chr3:49933780	55.0774	13.3256	23.234	3.3572	1.9349	3.0709
A59T	SNV	chr3:49933779	54.6154	14.0294	25.5724	1.121	1.6783	2.9834
A59G	SNV	chr3:49933779	60.7884	11.2582	20.2476	3.2899	1.8176	2.5983
AC60A	DEL	chr3:49933779	50.875	14.3511	26.05	4.4018	1.8426	2.4794
C60T	SNV	chr3:49933778	64.4147	9.7008	19.2968	1.8859	2.4729	2.2289
C60A	SNV	chr3:49933778	53.1692	13.2032	25.2548	4.0659	1.8871	2.4197
C61T	SNV	chr3:49933777	58.6255	12.0005	19.6748	4.3895	1.8078	3.5019
C61G	SNV	chr3:49933777	73.0194	3.2995	14.7786	5.4315	3.0032	0.4678
C61A	SNV	chr3:49933777	58.0474	14.8635	17.8651	4.0508	1.9372	3.2361
C62T	SNV	chr3:49933776	62.2157	13.6728	16.5136	3.1567	1.861	2.5802
C62A	SNV	chr3:49933776	58.3344	11.0437	22.7425	3.2873	1.556	3.0361
C63T	SNV	chr3:49933775	59.6504	12.6001	20.6244	3.3211	1.8158	1.9882
C63G	SNV	chr3:49933775	55.744	16.172	12.8934	12.0952	2.1186	0.9768
C63A	SNV	chr3:49933775	62.1044	7.9709	23.6388	3.2262	2.5839	0.4759
C63CT	IN	chr3:49933775	60.1438	9.0864	21.455	4.9351	1.7028	2.6768
C64T	SNV	chr3:49933774	58.5195	11.8913	19.2076	6.8215	1.4743	2.0858
C64A	SNV	chr3:49933774	58.0939	9.806	22.795	4.181	1.922	3.2022
C64CA	IN	chr3:49933774	59.4456	15.781	17.571	3.2478	1.619	2.3356
CA65C	DEL	chr3:49933774	50.9956	18.9484	21.7539	5.6736	0.8	1.8285
A65T	SNV	chr3:49933773	59.9271	12.122	19.3042	3.9679	1.9306	2.7483
A65G	SNV	chr3:49933773	63.3081	9.3603	19.5129	4.073	1.9592	1.7864
A65C	SNV	chr3:49933773	59.9155	10.8055	21.1969	4.3203	1.4922	2.2695
AG66A	DEL	chr3:49933773	53.0019	11.4209	23.4315	4.9508	3.6269	3.5681
G66T	SNV	chr3:49933772	61.2009	14.8295	16.5323	3.319	2.1602	1.9581
G66A	SNV	chr3:49933772	60.5098	11.8288	19.0915	3.8879	2.4304	2.2516
G67T	SNV	chr3:49933771	62.1328	13.7748	16.084	3.5068	2.1725	2.3291
G67C	SNV	chr3:49933771	53.7198	25.7477	14.3068	1.611	1.7923	2.8224
G67A	SNV	chr3:49933771	63.6903	12.6884	16.0569	3.1408	2.1717	2.2519
G68C	SNV	chr3:49933770	35.4029	36.7427	19.5598	1.6451	1.2986	5.3508
G68A	SNV	chr3:49933770	65.1443	11.326	14.5721	3.3157	2.2738	3.3682
A69T	SNV	chr3:49933769	61.8178	8.3627	21.0717	4.2899	1.8017	2.6563
A69G	SNV	chr3:49933769	58.5452	9.3875	24.3661	4.1516	1.7829	1.7667
A69C	SNV	chr3:49933769	72.727	6.6531	15.6127	2.8832	0.7578	1.3662
A69AT	IN	chr3:49933769	57.9946	10.7332	19.4156	7.2558	2.7473	1.8535
T70G	SNV	chr3:49933768	68.7026	8.179	16.0278	3.1513	2.0667	1.8726
T70C	SNV	chr3:49933768	60.6187	10.8579	20.0868	4.2126	2.0392	2.1847
T70A	SNV	chr3:49933768	60.5756	7.6475	22.6221	4.7924	2.5172	1.8452
TG71T	DEL	chr3:49933768	63.8725	9.9294	18.3967	3.8497	1.5004	2.4513
G71C	SNV	chr3:49933767	69.3358	12.3189	12.6516	3.5074	0.7337	1.4526
G71A	SNV	chr3:49933767	60.2738	10.2633	20.176	4.7039	2.1118	2.4712
G72T	SNV	chr3:49933766	58.8897	12.3109	20.0001	3.1143	2.8164	2.8686
G72C	SNV	chr3:49933766	64.9867	11.2629	16.6929	2.6351	2.0165	2.4059
G72A	SNV	chr3:49933766	58.3377	11.9451	21.4109	3.3055	2.0572	2.9436
G73T	SNV	chr3:49933765	64.4199	13.3681	14.7425	3.026	1.5545	2.8891
G73C	SNV	chr3:49933765	72.6686	6.7411	14.3291	3.6589	1.5325	1.0697
G73A	SNV	chr3:49933765	63.9043	13.5589	14.5191	3.2618	2.1725	2.5835
T74G	SNV	chr3:49933764	51.9545	16.7398	18.391	8.515	0.7892	3.6105
T74C	SNV	chr3:49933764	58.3377	12.7917	19.5856	3.912	2.6451	2.7279
T74A	SNV	chr3:49933764	58.2126	11.6171	22.7027	3.252	1.5801	2.6355
T74TG	IN	chr3:49933764	60.7289	14.6037	20.3569	2.5655	0.8599	0.8852
G75T	SNV	chr3:49933763	60.6856	10.2496	19.1698	5.3534	2.0165	2.5251
G75A	SNV	chr3:49933763	60.8279	12.0376	18.3287	3.7744	1.9971	3.0342
G76T	SNV	chr3:49933762	57.837	12.5294	21.2772	3.3303	2.2957	2.7304
G76C	SNV	chr3:49933762	61.2176	11.3955	18.2562	3.4313	2.3483	3.351
G76A	SNV	chr3:49933762	61.3618	13.435	17.5152	3.2692	1.7921	2.6266
C77T	SNV	chr3:49933761	59.4142	9.4553	22.9204	3.805	2.3037	2.1013
C77G	SNV	chr3:49933761	51.0272	4.7906	36.2662	1.6322	4.2428	2.0411
C77A	SNV	chr3:49933761	62.1942	9.7944	21.0551	3.4781	1.5553	1.9229
CA78C	DEL	chr3:49933761	56.207	13.2927	21.3129	4.946	2.38	1.8614
A78T	SNV	chr3:49933760	60.3789	10.5904	20.6182	4.5542	1.6208	2.2375
A78G	SNV	chr3:49933760	59.9646	10.9414	20.7994	4.2915	1.7786	2.2244
A78C	SNV	chr3:49933760	52.8076	18.1657	19.6528	3.6995	2.7104	2.964
AG79A	DEL	chr3:49933760	65.2715	10.7292	16.2469	2.5847	2.1059	3.0618
G79T	SNV	chr3:49933759	61.3032	13.6625	17.1404	3.0977	2.1264	2.6698
G79C	SNV	chr3:49933759	51.7779	12.5447	27.0601	4.719	2.1927	1.7056
G79A	SNV	chr3:49933759	62.3652	12.7673	18.5806	2.3817	1.7622	2.143
G80T	SNV	chr3:49933758	64.3091	12.8932	15.3259	3.0659	1.8639	2.5421
G80C	SNV	chr3:49933758	55.9929	16.9641	17.8773	4.3133	2.0411	2.8113
G80A	SNV	chr3:49933758	65.1503	11.7876	16.153	2.5779	1.8428	2.4884
G81T	SNV	chr3:49933757	53.434	15.6804	26.269	1.8757	1.5437	1.1972
G81A	SNV	chr3:49933757	63.2375	12.4858	16.3907	3.5835	1.9356	2.3669
A82T	SNV	chr3:49933756	58.7601	11.0879	20.9206	4.8349	2.0299	2.3666
A82G	SNV	chr3:49933756	60.4631	11.6907	19.7102	3.3925	1.9153	2.8282
A82C	SNV	chr3:49933756	59.1865	11.3304	20.8075	4.468	2.0337	2.1739
A83T	SNV	chr3:49933755	59.6365	11.79	18.8011	5.0519	1.7292	2.9912
A83G	SNV	chr3:49933755	60.0654	12.2822	19.5099	3.8797	1.7056	2.5573
T84G	SNV	chr3:49933754	64.1767	10.0466	17.486	2.5873	1.8708	3.8326
T84C	SNV	chr3:49933754	60.7524	11.1684	19.7461	3.705	2.043	2.5852
T84A	SNV	chr3:49933754	61.0696	13.2283	19.2095	2.3228	1.5816	2.5882
C85T	SNV	chr3:49933753	48.7255	18.259	25.4812	3.6432	2.2307	1.6602
C85A	SNV	chr3:49933753	53.0616	13.1154	24.006	6.1204	1.8256	1.871
T86G	SNV	chr3:49933752	50.1422	15.7805	27.5311	1.2737	3.7503	1.5221
T86C	SNV	chr3:49933752	52.3268	15.2928	23.5517	4.3814	2.0622	2.385
T86A	SNV	chr3:49933752	50.4433	15.4132	25.0336	5.0006	1.7774	2.3319
G87T	SNV	chr3:49933751	50.3216	14.8953	26.3699	4.5212	2.0922	1.7998
G87A	SNV	chr3:49933751	57.8181	11.7672	21.8856	4.227	1.634	2.6681
A88T	SNV	chr3:49933750	51.4092	14.9841	24.6002	5.2032	1.428	2.3753
A88G	SNV	chr3:49933750	53.0653	12.824	24.5948	5.7587	1.9281	1.8292
A88C	SNV	chr3:49933750	65.332	15.9528	9.1596	5.8829	1.9929	1.6798
G89T	SNV	chr3:49933749	55.4661	15.274	21.4925	3.6918	1.6314	2.4443
G89A	SNV	chr3:49933749	61.468	9.2158	22.318	3.2326	2.0614	1.7042
T90G	SNV	chr3:49933748	50.4567	12.1837	27.565	5.565	1.611	2.6187
T90C	SNV	chr3:49933748	58.9283	13.5809	18.8546	4.2567	1.8028	2.5766
T90A	SNV	chr3:49933748	58.0327	12.8531	20.203	4.3435	1.5514	3.0163
G91T	SNV	chr3:49933747	57.8999	12.6237	14.7484	4.6935	2.1493	7.8851
G91C	SNV	chr3:49933747	57.392	13.7728	19.9037	6.1407	1.5894	1.2014
G91A	SNV	chr3:49933747	56.9107	11.3821	22.7777	4.2598	2.092	2.5777
GC92G	DEL	chr3:49933747	61.8216	13.5525	17.5745	2.9507	1.9514	2.1492
C92T	SNV	chr3:49933746	56.3522	12.653	23.0794	3.6628	2.2045	2.0481
C92A	SNV	chr3:49933746	66.4471	11.568	16.2757	2.2139	1.3488	2.1465
C93T	SNV	chr3:49933745	56.861	12.0508	22.7685	4.2793	1.9329	2.1075
C93A	SNV	chr3:49933745	58.5169	10.664	21.0843	6.5963	0.7561	2.3824
C94T	SNV	chr3:49933744	58.3139	12.1736	21.1857	4.2561	2.003	2.0677
C94G	SNV	chr3:49933744	55.6993	13.9093	20.8586	5.4221	1.652	2.4587
C94A	SNV	chr3:49933744	65.936	9.7133	17.5483	2.5454	1.3118	2.9452
G95T	SNV	chr3:49933743	60.6272	10.5169	21.4132	3.7836	1.5943	2.0648
G95C	SNV	chr3:49933743	72.6692	10.784	11.9297	1.0415	1.7244	1.8511
G95A	SNV	chr3:49933743	58.4086	10.5267	23.0407	3.9338	1.5928	2.4975
G95GA	IN	chr3:49933743	60.126	10.276	21.2465	4.881	1.2221	2.2485
GA96G	DEL	chr3:49933743	44.8004	16.9306	26.4177	6.4001	2.3601	3.0912
A96T	SNV	chr3:49933742	54.3746	13.4097	23.5244	3.8009	2.2832	2.6071
A96G	SNV	chr3:49933742	59.1089	10.7086	21.7588	4.107	1.5281	2.7887
A96C	SNV	chr3:49933742	61.746	10.3093	20.3841	3.0897	1.8785	2.5924
AG97A	DEL	chr3:49933742	60.9267	11.0687	20.3993	3.1254	1.5431	2.9368
G97T	SNV	chr3:49933741	60.6125	12.5892	18.4322	3.2271	1.8861	3.2529
G97C	SNV	chr3:49933741	53.3689	17.2019	20.4822	3.3264	1.6515	3.9692
G97A	SNV	chr3:49933741	60.8357	11.2757	19.4616	4.0529	1.863	2.5111
G98T	SNV	chr3:49933740	61.019	13.6148	17.3129	3.2721	1.7941	2.9871
G98C	SNV	chr3:49933740	77.9844	7.3765	9.3	2.499	0.5341	2.306
G98A	SNV	chr3:49933740	62.423	12.0021	17.9166	3.4085	1.2038	3.046
G99T	SNV	chr3:49933739	63.0586	10.5122	17.2209	4.0828	1.7229	3.4026
G99C	SNV	chr3:49933739	59.0736	11.3741	19.0936	4.8887	1.8965	3.6734
G99A	SNV	chr3:49933739	60.9144	13.3874	16.9864	3.9804	2.4462	2.2852
G100T	SNV	chr3:49933738	57.917	10.2994	23.342	4.5888	1.8237	2.029
G100C	SNV	chr3:49933738	57.344	12.3416	21.0587	3.6761	1.9825	3.5972
G100A	SNV	chr3:49933738	62.0518	10.0469	19.5343	2.8658	2.0205	3.4808
A101T	SNV	chr3:49933737	59.1959	13.065	19.5595	4.2225	1.4891	2.4681
A101G	SNV	chr3:49933737	58.1938	12.3451	21.2817	4.1787	1.975	2.0256
T102C	SNV	chr3:49933736	60.8231	10.6991	19.8053	4.9893	1.9874	1.6958
T102A	SNV	chr3:49933736	58.9811	12.0291	20.5403	4.9477	1.4149	2.0869
TG103T	DEL	chr3:49933736	68.3331	9.105	15.4182	3.2377	1.7056	2.2004
G103T	SNV	chr3:49933735	55.247	12.5072	24.817	2.2983	3.048	2.0826
G103A	SNV	chr3:49933735	59.4618	8.7015	24.2847	3.8641	1.576	2.112
G104A	SNV	chr3:49933734	59.8778	11.4161	20.6884	4.0892	1.6198	2.3087
GA105G	DEL	chr3:49933734	60.4778	8.2113	22.3844	4.8424	3.0847	0.9993
A105T	SNV	chr3:49933733	60.8633	10.957	20.3794	3.4965	1.7778	2.526
A105G	SNV	chr3:49933733	59.1954	9.5518	22.9416	4.2483	1.7502	2.3127
A105C	SNV	chr3:49933733	49.4251	11.8984	31.4813	1.5524	2.4682	3.1745
G106T	SNV	chr3:49933732	62.2408	13.5042	17.6451	3.3907	1.5883	1.6308
G106C	SNV	chr3:49933732	58.7281	15.9415	15.3207	5.7579	1.0583	3.1936
G106A	SNV	chr3:49933732	59.1964	11.8789	21.3437	4.0428	1.5399	1.9983
C107T	SNV	chr3:49933731	57.9711	11.9571	22.7647	2.9188	2.1129	2.2755
C107G	SNV	chr3:49933731	60.7585	9.5149	19.8819	6.1811	1.6249	2.0387
C107A	SNV	chr3:49933731	58.222	12.6117	20.4969	4.0412	1.9413	2.6868
T108G	SNV	chr3:49933730	63.9104	10.1662	18.7113	2.832	1.6381	2.7421
T108C	SNV	chr3:49933730	64.0981	9.4944	18.6633	3.914	1.735	2.0952
T108A	SNV	chr3:49933730	58.6883	11.7507	21.8188	3.5096	1.8322	2.4004
G109T	SNV	chr3:49933729	51.6373	13.3567	26.9108	3.9371	1.2942	2.864
G109C	SNV	chr3:49933729	59.4909	13.317	19.2697	3.4402	1.6365	2.8457
G109A	SNV	chr3:49933729	57.4239	12.9542	20.5703	4.8201	1.8249	2.4067
C110T	SNV	chr3:49933728	66.7337	7.6683	17.1309	4.0388	1.5383	2.89
C110A	SNV	chr3:49933728	60.0652	8.6893	23.1719	3.8989	1.9059	2.2688
T111G	SNV	chr3:49933727	61.2548	12.2445	17.9593	4.575	1.6703	2.2961
T111C	SNV	chr3:49933727	59.826	10.5312	21.412	4.4721	1.5837	2.1749
T111A	SNV	chr3:49933727	62.047	10.4952	19.2339	4.2213	1.7744	2.2283
TG112T	DEL	chr3:49933727	60.073	12.3648	18.6268	4.2396	2.1817	2.5141
G112T	SNV	chr3:49933726	57.76	11.5191	21.6003	3.2131	2.7836	3.1239
G112C	SNV	chr3:49933726	71.0189	9.0281	13.6276	2.9597	1.5553	1.8104
G112A	SNV	chr3:49933726	59.8332	13.7532	17.9298	5.397	1.3558	1.7311
G113T	SNV	chr3:49933725	59.4936	15.0517	19.1041	3.2546	1.4418	1.6542
G113C	SNV	chr3:49933725	65.4784	14.2865	14.6884	1.5308	1.6211	2.3947
G113A	SNV	chr3:49933725	62.814	11.7108	17.001	4.2069	2.0102	2.2571
C114T	SNV	chr3:49933724	62.6674	11.0666	18.9459	2.7701	2.0475	2.5024
C114G	SNV	chr3:49933724	62.6448	12.1039	17.3902	4.3255	1.6426	1.893
C114A	SNV	chr3:49933724	63.3303	14.2001	13.7679	3.1233	2.3695	3.2088
CT115C	DEL	chr3:49933724	63.0884	10.0579	20.2756	2.7481	1.6968	2.1333
T115G	SNV	chr3:49933723	49.8033	22.3995	23.7094	0.8385	1.9597	1.2895
T115C	SNV	chr3:49933723	64.0723	10.5541	17.282	4.0658	1.6154	2.4103
T115A	SNV	chr3:49933723	58.8774	11.2114	20.503	4.7347	2.2422	2.4313
T116C	SNV	chr3:49933722	61.1955	9.7379	20.0352	4.7523	2.1266	2.1525
T116A	SNV	chr3:49933722	61.6065	10.6506	19.0724	3.7666	2.5199	2.3839
T117C	SNV	chr3:49933721	59.7651	13.2487	17.8573	3.7572	2.1795	3.1922
T117A	SNV	chr3:49933721	53.761	15.4595	21.6123	3.9425	1.7332	3.4916
TA118T	DEL	chr3:49933721	63.5811	9.1458	19.4538	4.8578	1.5581	1.4034
A118T	SNV	chr3:49933720	57.6933	11.1187	20.1909	6.0749	2.3096	2.6127
A118G	SNV	chr3:49933720	63.241	10.6799	17.9048	3.4507	2.0263	2.6972
A118C	SNV	chr3:49933720	57.8972	14.752	18.2783	3.6028	2.7606	2.7092
C119T	SNV	chr3:49933719	60.7272	9.9337	21.4505	3.9621	1.9746	1.9519
C119G	SNV	chr3:49933719	55.7635	14.1995	20.5414	5.4713	1.012	3.0124
C119A	SNV	chr3:49933719	51.0071	9.0785	30.3777	4.0135	3.7757	1.7475
A120T	SNV	chr3:49933718	58.2454	11.0963	22.1991	3.9013	1.736	2.822
A120G	SNV	chr3:49933718	58.8933	10.4785	21.759	4.4343	1.8516	2.5834
A120C	SNV	chr3:49933718	63.6867	11.0104	17.1907	6.0194	0.3105	1.7823
C121T	SNV	chr3:49933717	57.6944	11.8881	21.5954	4.7033	1.8587	2.26
C121G	SNV	chr3:49933717	59.8352	10.6206	18.8879	6.8438	1.9618	1.8507
C121A	SNV	chr3:49933717	56.6839	11.5133	22.9798	4.6235	2.0934	2.1062
T122G	SNV	chr3:49933716	64.7166	10.5142	17.9807	3.9716	1.4581	1.3588
T122C	SNV	chr3:49933716	60.083	13.6953	17.8351	4.0515	1.6781	2.6571
T122A	SNV	chr3:49933716	60.0073	12.4046	20.0044	3.2152	1.7513	2.6171
G123T	SNV	chr3:49933715	62.977	10.7361	18.2606	3.9532	1.4377	2.6355
G123C	SNV	chr3:49933715	60.0514	9.1434	20.2889	4.9399	3.1434	2.433
G123A	SNV	chr3:49933715	59.4898	9.6625	22.2837	4.3236	2.1092	2.1312
C124T	SNV	chr3:49933714	63.9274	9.4176	17.5894	4.5802	1.9829	2.5025
C124G	SNV	chr3:49933714	55.1686	13.7716	20.5948	5.1548	1.4755	3.8347
C124A	SNV	chr3:49933714	59.9189	11.8741	20.6873	3.2502	2.1377	2.1318
C125T	SNV	chr3:49933713	59.3824	13.0604	19.0444	4.4726	1.6518	2.3884
C125A	SNV	chr3:49933713	61.7134	10.3152	20.6355	3.5036	1.7018	2.1305
T126G	SNV	chr3:49933712	56.6369	13.7211	17.3834	4.1663	5.7865	2.306
T126C	SNV	chr3:49933712	57.2399	13.2548	21.5392	3.5056	2.0445	2.416
T126A	SNV	chr3:49933712	54.4082	10.0004	25.4803	6.6426	1.5299	1.9386
G127T	SNV	chr3:49933711	56.5451	11.7433	23.3459	4.2089	1.8076	2.3493
G127A	SNV	chr3:49933711	69.9537	7.1465	14.3596	5.2728	1.5461	1.7212
G128T	SNV	chr3:49933710	64.2833	6.9628	19.7962	3.8126	2.2719	2.8733
G128C	SNV	chr3:49933710	66.3999	11.4042	16.5919	2.9709	0.8776	1.7555
G128A	SNV	chr3:49933710	64.1146	9.414	18.6678	3.3888	1.9492	2.4656
C129T	SNV	chr3:49933709	61.5389	10.3623	19.3312	4.64	2.1084	2.0192
C129G	SNV	chr3:49933709	59.7647	15.7988	17.383	3.4656	0.8906	2.6972
C129A	SNV	chr3:49933709	59.8943	13.8024	18.5917	3.9361	2.0655	1.7101
CT130C	DEL	chr3:49933709	74.0078	6.0536	13.256	3.4177	1.2988	1.966
T130G	SNV	chr3:49933708	60.1294	14.556	17.831	3.5098	1.9506	2.0232
T130C	SNV	chr3:49933708	60.371	14.7339	16.8416	3.7365	1.8203	2.4966
T130A	SNV	chr3:49933708	57.9336	10.9163	22.6174	4.505	1.4052	2.6225
T131G	SNV	chr3:49933707	54.8965	10.5171	22.7477	7.4387	2.6005	1.7995
T131C	SNV	chr3:49933707	54.9513	12.5688	23.9773	3.8259	2.1533	2.5234
T131A	SNV	chr3:49933707	56.037	13.9428	21.5888	3.9161	2.2127	2.3025
T132G	SNV	chr3:49933706	53.6216	12.968	20.1706	6.5464	1.4267	5.2666
T132C	SNV	chr3:49933706	60.3391	11.7866	19.7343	3.8264	1.7353	2.5784
T132A	SNV	chr3:49933706	59.1999	8.7061	22.5597	4.6267	2.7958	2.1118
TC133T	DEL	chr3:49933706	69.8509	6.8465	17.3894	1.3877	2.6426	1.8829
C133T	SNV	chr3:49933705	56.9153	11.5952	23.4861	3.9878	1.8538	2.1618
C133G	SNV	chr3:49933705	58.5124	23.3155	12.5198	3.7312	1.5598	0.3613
C133A	SNV	chr3:49933705	60.615	16.0304	15.7334	3.5507	1.0866	2.9839
G134T	SNV	chr3:49933704	65.5943	8.2916	19.721	2.7761	1.6572	1.9596
G134C	SNV	chr3:49933704	61.1806	10.3749	20.7454	3.1314	1.7133	2.8544
G134A	SNV	chr3:49933704	59.0603	11.3072	21.5714	4.0803	1.5772	2.4037
C135T	SNV	chr3:49933703	52.5905	15.3499	23.0132	3.8971	2.1442	3.0052
C135G	SNV	chr3:49933703	26.9966	28.693	29.4092	9.9557	0.3244	4.621
C135A	SNV	chr3:49933703	73.0956	4.8224	11.5681	7.4621	1.3781	1.6738
T136C	SNV	chr3:49933702	60.271	12.6952	18.1302	4.468	1.8644	2.5712
T136A	SNV	chr3:49933702	55.7212	11.677	23.5412	4.7706	1.8791	2.4108
T137G	SNV	chr3:49933701	59.5349	12.5423	18.8358	4.006	2.078	3.003
T137C	SNV	chr3:49933701	58.963	10.7911	21.9284	3.9887	2.0688	2.26
T137A	SNV	chr3:49933701	60.812	9.979	20.02	4.6245	1.7799	2.7845
TC138T	DEL	chr3:49933701	58.1841	11.9684	21.3932	3.5939	2.6753	2.185
C138T	SNV	chr3:49933700	55.1692	12.1836	23.2032	4.1608	2.1757	3.1074
C139T	SNV	chr3:49933699	55.5466	11.843	23.9661	4.3289	1.5842	2.7312
C139A	SNV	chr3:49933699	57.8494	11.7139	21.9758	4.4378	2.0631	1.96
T140G	SNV	chr3:49933698	30.937	29.7072	26.2443	3.9486	1.2974	7.8655
T140C	SNV	chr3:49933698	58.4047	12.6677	20.9654	3.9813	1.835	2.146
T140A	SNV	chr3:49933698	57.8455	12.465	20.6664	4.3689	2.1458	2.5085
A141T	SNV	chr3:49933697	58.3593	10.943	21.2438	4.8333	1.9475	2.6729
A141G	SNV	chr3:49933697	60.9858	12.1877	19.1862	4.005	1.402	2.2332
A141C	SNV	chr3:49933697	55.9212	15.6861	19.5017	4.1605	1.9508	2.7796
A141AC	IN	chr3:49933697	59.2397	10.6255	21.9074	4.6179	1.4238	2.1858
AC142A	DEL	chr3:49933697	61.6854	11.122	19.7548	3.0067	1.7595	2.6716
C142T	SNV	chr3:49933696	59.4492	11.2132	20.4025	4.1734	2.0562	2.7057
C142G	SNV	chr3:49933696	57.5191	13.1046	20.5013	4.5392	1.4755	2.8603
C142A	SNV	chr3:49933696	52.9325	19.1125	20.167	3.3003	1.754	2.7336
C143T	SNV	chr3:49933695	52.5165	14.5718	25.1011	2.9382	2.1234	2.7489
C143G	SNV	chr3:49933695	55.2282	13.063	21.5785	4.805	2.0242	3.301
C143A	SNV	chr3:49933695	59.7972	13.3861	18.5288	3.4258	2.1209	2.7412
C144T	SNV	chr3:49933694	56.4441	14.8871	18.9205	3.9095	1.8996	3.9392
C144G	SNV	chr3:49933694	64.3993	10.5116	16.5834	1.9157	4.0269	2.5631
C144A	SNV	chr3:49933694	66.4777	11.1304	13.9856	3.4043	2.1774	2.8246
C145T	SNV	chr3:49933693	59.2787	11.1755	21.3724	3.3209	2.1795	2.6731
C145G	SNV	chr3:49933693	58.5475	13.1157	19.2425	4.037	2.366	2.6913
C145A	SNV	chr3:49933693	56.8895	12.7795	22.7346	2.604	2.8834	2.109
C146T	SNV	chr3:49933692	61.7443	10.3462	19.8805	3.871	1.9055	2.2526
C146A	SNV	chr3:49933692	61.8127	8.9912	18.652	4.0863	1.4805	4.9772
CA147C	DEL	chr3:49933692	46.2231	21.276	27.8383	2.0025	0.8066	1.8535
A147T	SNV	chr3:49933691	60.8025	10.6847	20.3776	4.0386	1.7643	2.3323
A147G	SNV	chr3:49933691	60.4213	11.2856	19.591	4.2875	1.5756	2.839
A147C	SNV	chr3:49933691	60.9462	11.4069	19.071	3.9796	1.9934	2.6029
A147AC	IN	chr3:49933691	62.6213	9.7447	18.7235	4.8278	1.9912	2.0916
AC148A	DEL	chr3:49933691	62.3899	11.5698	18.1867	3.7189	1.8901	2.2445
C148T	SNV	chr3:49933690	62.1887	12.0947	18.0873	3.233	1.8931	2.5032
C148G	SNV	chr3:49933690	61.9687	10.4628	19.4833	3.7972	1.5365	2.7515
C148A	SNV	chr3:49933690	70.401	7.6667	17.6268	0.6216	0.4336	3.2504
C149T	SNV	chr3:49933689	61.1429	11.8555	18.7121	3.9792	1.6933	2.6169
C149G	SNV	chr3:49933689	56.541	10.9163	21.6539	6.3316	2.2441	2.3132
C149A	SNV	chr3:49933689	55.466	12.8614	22.657	4.4369	2.4281	2.1505
C150T	SNV	chr3:49933688	56.9526	14.9553	19.3481	4.212	1.9412	2.5908
C150G	SNV	chr3:49933688	62.0392	12.3502	18.6316	2.0257	3.8117	1.1417
C150A	SNV	chr3:49933688	60.3457	12.9668	19.1206	3.2454	1.9116	2.4099
C151T	SNV	chr3:49933687	54.2726	14.0674	21.9028	4.9106	2.052	2.7945
C151CT	IN	chr3:49933687	61.257	7.2097	25.0021	3.2455	0.9002	2.3856
A152T	SNV	chr3:49933686	57.5351	12.8755	21.5516	3.8771	1.4193	2.7414
A152G	SNV	chr3:49933686	58.779	12.4478	20.4708	4.4897	1.7333	2.0794
A152C	SNV	chr3:49933686	66.2252	11.9598	15.2315	3.1319	1.0972	2.3544
AT153A	DEL	chr3:49933686	67.9904	8.4047	15.3329	3.423	1.9508	2.8981
T153C	SNV	chr3:49933685	57.4911	12.7616	22.073	3.6154	1.9928	2.066
T153A	SNV	chr3:49933685	58.8358	14.3482	19.1911	3.9852	1.565	2.0748
C154T	SNV	chr3:49933684	59.6289	9.4556	21.9759	4.167	1.6305	3.1421
C154G	SNV	chr3:49933684	54.2685	13.1899	23.8521	4.1726	2.5722	1.9448
C154A	SNV	chr3:49933684	58.9972	10.5375	22.6563	4.4275	1.3457	2.0358
C155T	SNV	chr3:49933683	59.3141	10.5427	21.7337	4.4416	1.8031	2.1647
C155G	SNV	chr3:49933683	62.3916	10.4335	18.252	4.0883	1.9573	2.8773
C155A	SNV	chr3:49933683	57.1246	13.2968	20.6587	3.8936	1.8899	3.1364
CA156C	DEL	chr3:49933683	62.3513	7.8431	22.3729	3.6668	1.7492	2.0168
A156T	SNV	chr3:49933682	60.4098	10.2784	21.3302	3.9563	1.8402	2.1851
A156G	SNV	chr3:49933682	57.1952	12.2093	21.6544	4.3248	1.8733	2.7431
A156C	SNV	chr3:49933682	65.9916	11.161	15.1372	3.2537	1.9779	2.4787
AC157A	DEL	chr3:49933682	59.9103	10.8656	20.8589	3.9563	1.9697	2.4392
C157T	SNV	chr3:49933681	63.081	10.4921	18.1275	3.6273	2.1851	2.487
C157G	SNV	chr3:49933681	59.1017	10.6034	21.962	3.4777	2.2445	2.6107
C157A	SNV	chr3:49933681	47.014	13.0036	27.0652	4.3205	4.8173	3.7793
C158T	SNV	chr3:49933680	57.9215	11.3633	21.8398	4.4281	1.8469	2.6005
C158G	SNV	chr3:49933680	53.9232	13.0341	24.121	4.5362	2.1894	2.196
C158A	SNV	chr3:49933680	57.3785	12.7967	21.2979	3.5581	1.9581	3.0106
C159T	SNV	chr3:49933679	56.842	10.7575	24.1162	3.4223	2.3332	2.5289
C159G	SNV	chr3:49933679	56.4033	9.9693	24.468	1.8189	2.9939	4.3466
C159A	SNV	chr3:49933679	75.3676	4.8995	13.1617	3.116	2.2411	1.214
CA160C	DEL	chr3:49933679	66.755	8.0956	17.7566	4.1866	1.2423	1.9639
A160T	SNV	chr3:49933678	59.1754	13.4039	19.2433	3.0824	2.2708	2.8242
A160G	SNV	chr3:49933678	60.1205	14.8042	17.1594	2.8503	2.0048	3.0607
A160C	SNV	chr3:49933678	63.0096	8.9657	20.7615	4.1413	1.6849	1.4371
G161T	SNV	chr3:49933677	60.0395	9.088	21.2334	4.7363	1.7621	3.1407
G161C	SNV	chr3:49933677	54.3319	13.5297	20.5065	6.0054	2.4378	3.1887
G161A	SNV	chr3:49933677	57.6257	11.6493	20.7869	5.2851	2.1722	2.4808
T162G	SNV	chr3:49933676	60.4192	8.8846	22.4296	3.6892	2.0883	2.4891
T162C	SNV	chr3:49933676	61.6724	11.3335	18.5806	3.6797	2.1635	2.5704
T162A	SNV	chr3:49933676	59.2923	11.827	20.6125	4.04	1.8903	2.3378
G163T	SNV	chr3:49933675	57.4046	7.9297	25.5595	5.3249	2.0222	1.7591
G163C	SNV	chr3:49933675	50.0449	16.5529	25.3842	3.6471	2.5527	1.8182
G163A	SNV	chr3:49933675	60.6201	11.5071	20.0894	4.165	1.4198	2.1986
C164T	SNV	chr3:49933674	59.4618	11.8318	20.511	4.032	1.7549	2.4085
C164G	SNV	chr3:49933674	66.0059	4.1821	18.6132	5.856	2.9823	2.3605
C164A	SNV	chr3:49933674	64.3209	13.4847	15.4351	2.0095	2.4977	2.2521
C165T	SNV	chr3:49933673	54.8943	12.733	23.9557	4.8489	1.7083	1.8598
C165G	SNV	chr3:49933673	66.1211	6.736	19.0136	0.5667	3.883	3.6795
C165A	SNV	chr3:49933673	65.4771	14.6526	12.3632	3.7696	1.3296	2.4079
CA166C	DEL	chr3:49933673	59.2359	13.9322	15.2071	7.5784	0.5296	3.5168
A166T	SNV	chr3:49933672	60.6148	11.674	20.4211	2.7693	2.0275	2.4934
A166G	SNV	chr3:49933672	60.6827	12.394	18.8949	3.5191	1.905	2.6043
A166C	SNV	chr3:49933672	59.7466	9.7404	22.4415	4.4531	2.1192	1.4992
A167T	SNV	chr3:49933671	57.2858	14.1915	19.7021	4.3789	1.9562	2.4855
A167G	SNV	chr3:49933671	58.5899	9.2902	24.1321	3.995	2.1408	1.8521
AC168A	DEL	chr3:49933671	48.8728	13.7948	26.9063	6.281	2.2159	1.9294
C168T	SNV	chr3:49933670	61.1286	10.0634	22.2253	2.875	1.6243	2.0834
C168G	SNV	chr3:49933670	61.1307	10.1012	19.789	3.2531	2.3623	3.3638
C168A	SNV	chr3:49933670	65.3012	8.5702	21.9786	3.0732	0.5645	0.5124
C169T	SNV	chr3:49933669	61.0374	9.9471	20.8645	3.8412	2.2609	2.0489
C169G	SNV	chr3:49933669	55.283	16.0215	20.1737	4.801	1.3387	2.3821
C169A	SNV	chr3:49933669	62.5692	11.6923	17.7033	3.5478	1.5663	2.9211
T170G	SNV	chr3:49933668	65.848	12.8533	14.6774	2.876	1.7939	1.9514
T170C	SNV	chr3:49933668	57.5269	13.1785	20.6731	3.8712	2.0627	2.6875
T170A	SNV	chr3:49933668	59.2268	11.9374	21.5405	3.6605	1.6753	1.9595
A171T	SNV	chr3:49933667	60.3861	12.7388	18.4741	3.368	1.7694	3.2636
A171G	SNV	chr3:49933667	60.2568	13.9382	16.8958	4.4033	1.5851	2.921
A171C	SNV	chr3:49933667	52.7712	22.4017	17.7411	3.0246	2.5801	1.4813
G172T	SNV	chr3:49933666	63.4396	13.5608	14.1238	4.8391	1.0153	3.0214
G172A	SNV	chr3:49933666	58.684	13.1283	19.4499	4.1845	2.2439	2.3094
GT173G	DEL	chr3:49933666	86.2638	4.1801	7.697	0.7051	0.1455	1.0085
T173G	SNV	chr3:49933665	61.1599	10.0698	20.5187	3.7039	1.4866	3.0611
T173C	SNV	chr3:49933665	59.8332	11.3827	20.6909	3.7084	2.0198	2.365
T173A	SNV	chr3:49933665	61.2282	12.1147	18.3287	4.3372	1.4537	2.5375
T174G	SNV	chr3:49933664	41.7257	15.4081	36.076	2.5462	2.6308	1.6133
T174C	SNV	chr3:49933664	54.2552	11.8413	24.6048	4.7497	2.2447	2.3044
T174A	SNV	chr3:49933664	64.1029	10.8112	17.5703	3.6187	1.9921	1.9047
C175T	SNV	chr3:49933663	57.5523	9.5637	24.0638	3.6442	2.6692	2.5068
C175G	SNV	chr3:49933663	57.5976	14.1472	18.688	5.8172	1.9734	1.7766
C175A	SNV	chr3:49933663	75.0875	1.6048	13.9473	3.4908	2.7029	3.1667
C176T	SNV	chr3:49933662	62.5692	12.2828	18.9528	2.4172	1.8074	1.9706
C176A	SNV	chr3:49933662	59.0494	11.0873	21.9525	2.5069	2.5448	2.859
A177T	SNV	chr3:49933661	55.3685	9.6427	26.6544	4.3025	1.9718	2.0601
A177G	SNV	chr3:49933661	58.6091	11.0544	23.0195	2.7599	2.5234	2.0337
A177C	SNV	chr3:49933661	47.8363	20.8074	23.2609	3.2901	1.8706	2.9347
C178T	SNV	chr3:49933660	62.7646	13.1995	16.6789	2.2721	1.4099	3.675
C178G	SNV	chr3:49933660	69.749	11.4537	13.2905	2.6279	1.1677	1.7112
C178A	SNV	chr3:49933660	59.1763	9.3885	22.237	3.8725	1.1154	4.2103
T179G	SNV	chr3:49933659	58.0638	15.0677	19.7514	3.599	1.4227	2.0956
T179C	SNV	chr3:49933659	61.3783	11.1167	18.7358	4.4142	1.9042	2.4507
T179A	SNV	chr3:49933659	60.5979	9.5336	21.1149	4.7232	1.9487	2.0817
G180T	SNV	chr3:49933658	53.2456	8.7933	27.6067	5.8758	1.5516	2.9271
G180A	SNV	chr3:49933658	49.55	12.0495	28.3724	5.7409	2.5405	1.7467
A181T	SNV	chr3:49933657	53.9727	11.0003	27.5987	3.9922	1.4511	1.9849
A181G	SNV	chr3:49933657	60.792	12.1964	20.093	2.308	1.9256	2.685
A181C	SNV	chr3:49933657	62.0284	14.092	13.6136	6.0874	1.0866	3.0919
A182T	SNV	chr3:49933656	58.6987	12.1019	18.7131	7.5565	0.8289	2.1008
A182G	SNV	chr3:49933656	59.3221	8.4843	22.4614	4.0418	2.1476	3.5428
A182C	SNV	chr3:49933656	51.6959	7.7029	31.8679	2.7491	3.0706	2.9137
G183T	SNV	chr3:49933655	65.9383	8.7879	15.4012	6.2591	1.8424	1.7712
G183C	SNV	chr3:49933655	54.9804	5.4758	27.5832	6.2989	3.2374	2.4243
G183A	SNV	chr3:49933655	56.1095	12.6667	22.3763	4.1438	1.8927	2.811
C184T	SNV	chr3:49933654	67.3509	12.9125	13.6656	3.5261	0.8981	1.6468
C184A	SNV	chr3:49933654	62.4812	19.6929	12.5846	0.5605	2.6039	2.0768
C185T	SNV	chr3:49933653	66.3434	15.3785	15.3785	0.9599	0.02	1.9198
C185A	SNV	chr3:49933653	55.9621	16.2659	22.5185	1.1321	1.1794	2.942
T186G	SNV	chr3:49933652	61.26	1.5489	19.8335	11.7923	5.1009	0.4645
T186C	SNV	chr3:49933652	59.7369	12.3604	20.2344	3.6736	1.8261	2.1685
T186A	SNV	chr3:49933652	60.5973	11.2766	20.1291	3.5239	1.9527	2.5204
G187T	SNV	chr3:49933651	63.0721	8.4883	23.5018	0.4719	2.2598	2.2061
G187A	SNV	chr3:49933651	52.9944	15.3542	21.4308	5.8661	2.0922	2.2624
A188T	SNV	chr3:49933650	57.4024	10.7787	22.6848	4.8964	1.9756	2.2622
A188G	SNV	chr3:49933650	58.4302	10.102	23.8541	3.5305	1.563	2.5202
A188C	SNV	chr3:49933650	60.5587	11.3005	20.0195	3.6815	1.8499	2.5899
AG189A	DEL	chr3:49933650	56.0033	9.5557	26.2848	2.7394	1.0518	4.365
G189T	SNV	chr3:49933649	59.6798	8.2034	24.6924	4.1091	1.4164	1.8988
G189C	SNV	chr3:49933649	58.1247	10.7673	23.4584	3.3522	1.6146	2.6828
G189A	SNV	chr3:49933649	59.0293	12.2735	19.6942	5.032	1.5823	2.3888
G190T	SNV	chr3:49933648	57.5791	7.1909	26.1521	4.7261	1.4453	2.9066
G190A	SNV	chr3:49933648	67.2965	9.5229	15.8681	4.0074	1.4058	1.8993
A191T	SNV	chr3:49933647	55.531	10.4953	24.8998	5.0175	1.4779	2.5785
A191G	SNV	chr3:49933647	58.3759	8.4076	25.5787	4.2005	1.6897	1.7476
A191C	SNV	chr3:49933647	60.1061	6.8889	23.7919	4.2206	2.1642	2.8284
G192T	SNV	chr3:49933646	66.2608	9.7562	17.0408	3.3941	1.8465	1.7017
G192C	SNV	chr3:49933646	57.5456	11.2915	23.4756	3.475	2.4335	1.7788
G192A	SNV	chr3:49933646	57.2458	13.5389	20.7067	4.1731	1.9277	2.4078
C193T	SNV	chr3:49933645	62.7665	10.7672	19.3397	3.0858	1.8507	2.1902
C193G	SNV	chr3:49933645	61.201	9.3317	20.783	4.3871	1.6177	2.6794
C193A	SNV	chr3:49933645	60.3746	10.2334	22.2032	2.7688	2.2188	2.2011
A194T	SNV	chr3:49933644	55.7238	12.4732	23.341	4.0544	2.2853	2.1224
A194G	SNV	chr3:49933644	60.3621	10.8858	20.3833	4.1275	1.9354	2.3058
T195G	SNV	chr3:49933643	60.407	10.8375	22.9421	3.1915	1.361	1.2609
T195C	SNV	chr3:49933643	59.8493	11.7611	19.9445	4.3027	1.7597	2.3828
T195A	SNV	chr3:49933643	62.092	12.9073	18.0658	3.3809	1.3568	2.1972
G196T	SNV	chr3:49933642	61.0608	11.8252	18.8259	4.0078	1.6682	2.6122
G196C	SNV	chr3:49933642	62.9059	8.7119	19.8661	3.9156	2.5843	2.0162
G196A	SNV	chr3:49933642	62.9239	10.3603	18.8869	3.7306	1.7524	2.3459
C197T	SNV	chr3:49933641	58.4936	11.5836	21.0012	5.7533	1.9196	1.2487
C197G	SNV	chr3:49933641	55.3509	8.8538	21.4153	7.4796	3.5021	3.3984
C197A	SNV	chr3:49933641	58.5992	11.896	21.1929	3.3255	1.9708	3.0156
C198T	SNV	chr3:49933640	55.7489	11.7687	23.9635	4.5479	1.8838	2.0871
C198G	SNV	chr3:49933640	69.1568	12.4959	12.2711	2.6545	1.4821	1.9397
C198A	SNV	chr3:49933640	52.5828	14.3361	24.6759	4.4583	1.3977	2.5493
A199T	SNV	chr3:49933639	61.603	9.6152	19.859	4.1276	2.1265	2.6686
A199G	SNV	chr3:49933639	60.4294	10.6109	20.7061	3.3266	2.8309	2.0962
A199C	SNV	chr3:49933639	63.5982	9.7615	18.4987	4.1809	1.7606	2.2001
AT200A	DEL	chr3:49933639	63.0834	7.4671	14.9533	9.9904	1.5096	2.996
T200C	SNV	chr3:49933638	63.0243	11.1156	18.2538	3.4935	1.7986	2.3143
T200A	SNV	chr3:49933638	60.056	11.7803	20.1203	3.7882	2.2744	1.9807
T201G	SNV	chr3:49933637	60.373	17.026	14.5393	3.339	1.855	2.8677
T201C	SNV	chr3:49933637	59.9203	12.6883	17.2784	5.7628	1.6644	2.6857
T201A	SNV	chr3:49933637	62.4246	12.4361	17.1424	3.9247	1.9202	2.1522
A202T	SNV	chr3:49933636	61.6746	12.6758	18.7237	3.1375	1.4595	2.329
A202G	SNV	chr3:49933636	58.2765	12.8143	20.708	3.9814	1.7787	2.4411
A202C	SNV	chr3:49933636	56.8435	14.8179	20.9922	3.3802	1.8434	2.1228
A203T	SNV	chr3:49933635	58.8684	12.5945	19.0158	5.3133	1.616	2.592
A203G	SNV	chr3:49933635	53.3792	11.6657	27.3186	3.5126	1.8818	2.2421
G204T	SNV	chr3:49933634	64.3485	3.8192	24.5869	4.1593	1.0987	1.9875
G204C	SNV	chr3:49933634	60.6218	9.6567	19.4238	6.0534	2.2167	2.0276
G204A	SNV	chr3:49933634	64.0122	14.3087	13.3192	4.3234	1.2171	2.8193
T205G	SNV	chr3:49933633	64.2436	15.0485	14.2486	2.9597	0.5399	2.9597
T205C	SNV	chr3:49933633	64.2768	10.6526	17.0699	4.0646	1.3494	2.5867
T205A	SNV	chr3:49933633	60.6042	11.256	20.6856	2.5482	1.6387	3.2673
T206G	SNV	chr3:49933632	55.9843	10.5175	25.5557	3.9015	2.0949	1.9462
T206C	SNV	chr3:49933632	59.4321	13.2211	18.9303	4.0698	1.951	2.3957
T206A	SNV	chr3:49933632	59.3448	10.7487	21.6326	4.7286	1.9945	1.5509
T207G	SNV	chr3:49933631	58.6255	11.5387	21.802	4.6593	1.9302	1.4443
T207C	SNV	chr3:49933631	65.5561	9.5157	17.7313	3.8668	1.2823	2.0478
T207A	SNV	chr3:49933631	63.9533	8.6213	21.5203	2.5709	1.2317	2.1025
G208T	SNV	chr3:49933630	55.068	13.4675	23.37	3.8518	1.0767	3.1661
G208A	SNV	chr3:49933630	61.952	12.1826	18.3747	3.4522	1.7753	2.2631
A209T	SNV	chr3:49933629	57.7937	11.9582	22.9236	3.1857	1.3088	2.83
A209G	SNV	chr3:49933629	54.2729	9.3964	28.3758	4.1433	1.4939	2.3177
A209C	SNV	chr3:49933629	64.2969	8.7475	19.6065	2.6375	1.2607	3.4509
G210T	SNV	chr3:49933628	46.0246	7.5008	38.5751	3.5981	1.5589	2.7424
G210C	SNV	chr3:49933628	60.1048	8.5361	25.0887	2.6778	1.064	2.5286
G210A	SNV	chr3:49933628	49.9689	10.0228	30.2621	4.929	1.4775	3.3398
G211T	SNV	chr3:49933627	3.0639	0.726	83.6262	12.0004	0.3922	0.1913
G211C	SNV	chr3:49933627	1.8035	8.5226	70.6748	12.1763	0.0802	6.7426
T212C	SNV	chr3:49933626	22.5222	5.3979	58.1568	9.9907	1.0036	2.9288
T212A	SNV	chr3:49933626	3.2963	1.4771	80.0423	14.6607	0.0603	0.4634
A213T	SNV	chr3:49933625	40.6763	6.5254	45.0882	4.8886	0.9948	1.8268
A213G	SNV	chr3:49933625	55.7607	11.3547	25.1848	3.4598	1.5296	2.7104
A214T	SNV	chr3:49933624	58.1813	8.1049	25.2693	4.7527	1.2959	2.396
A214G	SNV	chr3:49933624	53.3741	10.4509	28.3908	4.1869	1.4575	2.1399
A214C	SNV	chr3:49933624	66.7222	5.6234	21.0223	4.6625	0.8435	1.1261
G215C	SNV	chr3:49933623	43.5998	7.1119	39.9338	5.1527	0.7679	3.4339
G215A	SNV	chr3:49933623	46.981	6.4205	39.482	3.7692	0.9947	2.3526
T216G	SNV	chr3:49933622	49.2886	4.7123	39.0341	2.7538	1.7624	2.4487
T216C	SNV	chr3:49933622	57.1653	10.5207	24.3195	3.2601	1.3846	3.3498
T216A	SNV	chr3:49933622	52.464	10.6884	28.1284	4.465	1.844	2.4102
G217T	SNV	chr3:49933621	51.932	14.8507	23.5615	4.3452	3.3062	2.0044
G217C	SNV	chr3:49933621	59.2027	14.7402	15.5414	4.9336	2.9309	2.6512
G217A	SNV	chr3:49933621	62.1447	8.92	20.6041	3.6515	2.4419	2.2378
GT218G	DEL	chr3:49933621	58.9375	29.7604	6.7624	1.0971	1.3814	2.0611
T218G	SNV	chr3:49933620	67.557	4.1987	21.5333	5.7904	0.014	0.9067
T218C	SNV	chr3:49933620	56.7078	10.8906	22.4588	5.1529	2.0923	2.6976
T218A	SNV	chr3:49933620	59.656	12.6007	20.5926	2.9431	1.5898	2.6176
TA219T	DEL	chr3:49933620	55.142	12.6008	23.5654	2.8325	2.2807	3.5787
A219T	SNV	chr3:49933619	57.8502	10.6869	23.765	3.4989	1.691	2.508
A219G	SNV	chr3:49933619	64.7913	9.1172	18.2825	3.5791	2.057	2.1729
A220T	SNV	chr3:49933618	54.4201	19.0284	18.0228	3.9052	1.8725	2.751
A220G	SNV	chr3:49933618	58.5997	10.4105	21.4347	5.0723	2.0336	2.4491
A220C	SNV	chr3:49933618	64.7415	12.2644	16.275	3.0161	1.6926	2.0104
AG221A	DEL	chr3:49933618	49.953	19.2014	24.0009	2.5714	1.3655	2.9078
G221T	SNV	chr3:49933617	54.0781	14.5854	21.5842	4.1373	3.1753	2.4398
G221A	SNV	chr3:49933617	53.7767	10.5697	28.0612	3.3272	2.0113	2.2539
G222T	SNV	chr3:49933616	58.8276	9.2875	23.9449	4.3223	2.0757	1.5421
G222A	SNV	chr3:49933616	54.4823	8.1625	28.6208	4.998	1.4753	2.2612
G223T	SNV	chr3:49933615	65.2568	14.8085	15.3935	2.4803	0.7613	1.2996
G223A	SNV	chr3:49933615	54.2873	12.9308	24.6648	4.3084	1.6371	2.1716
A224T	SNV	chr3:49933614	55.2206	15.0006	21.9646	3.8994	1.7073	2.2075
A224G	SNV	chr3:49933614	56.947	15.9879	18.1568	4.7779	1.7244	2.4061
T225C	SNV	chr3:49933613	61.9712	13.4993	16.5117	3.7338	1.9257	2.3584
T225A	SNV	chr3:49933613	57.5846	7.6998	22.0136	3.4256	3.6356	5.6408
TA226T	DEL	chr3:49933613	43.5618	32.9495	15.1543	3.5849	2.817	1.9324
A226T	SNV	chr3:49933612	52.9917	14.6151	21.8823	5.7593	2.4477	2.3039
A226G	SNV	chr3:49933612	61.4758	13.9354	15.8688	4.0137	2.0617	2.6445
A226C	SNV	chr3:49933612	45.7362	23.2895	22.3117	1.6697	2.1585	4.8344
A226AT	IN	chr3:49933612	57.1001	7.6909	23.591	6.8322	2.5857	2.2001
A226AG	IN	chr3:49933612	63.2747	8.7621	20.7059	4.1951	1.4524	1.6098
AG227A	DEL	chr3:49933612	50.1093	10.152	33.5288	1.4048	2.8425	1.9625
G227T	SNV	chr3:49933611	56.5651	12.1835	20.9696	5.6009	1.9609	2.7199
G227C	SNV	chr3:49933611	17.0079	26.0958	48.0781	3.8287	3.6957	1.2939
G227A	SNV	chr3:49933611	51.0875	13.9604	23.789	6.3306	1.9613	2.8712
G228T	SNV	chr3:49933610	38.9397	20.4083	32.9088	2.3285	3.3345	2.0801
G228A	SNV	chr3:49933610	42.8608	19.4092	29.1888	4.5563	1.1805	2.8044
G228GT	IN	chr3:49933610	55.2816	16.3331	23.0457	1.7308	1.389	2.2198
G229T	SNV	chr3:49933609	44.9287	20.6603	28.177	2.6739	1.2937	2.2664
G229C	SNV	chr3:49933609	35.8107	16.0915	35.6786	4.5815	1.8953	5.9424
G229A	SNV	chr3:49933609	41.7612	18.1421	31.5028	4.8072	1.4144	2.3723
G230T	SNV	chr3:49933608	44.7483	21.7227	24.2862	4.1131	1.7228	3.4068
G230C	SNV	chr3:49933608	44.8582	15.6896	29.6275	4.5629	2.0975	3.1643
G230A	SNV	chr3:49933608	50.9166	15.6972	25.3398	3.9333	1.8181	2.295
C231T	SNV	chr3:49933607	58.1177	10.6193	21.3816	5.1045	2.1933	2.5835
C231A	SNV	chr3:49933607	61.138	10.6166	16.2478	5.1108	2.702	4.1848
CA232C	DEL	chr3:49933607	66.8749	9.9902	12.7899	6.1999	2.0089	2.1362
A232T	SNV	chr3:49933606	59.1462	13.2022	18.9114	4.4795	1.9431	2.3175
A232G	SNV	chr3:49933606	61.927	9.2809	19.3463	4.6453	2.2576	2.543
A232C	SNV	chr3:49933606	54.8934	16.5739	19.4414	4.0993	2.585	2.4069
AG233A	DEL	chr3:49933606	53.1453	17.3361	23.6237	2.5229	1.4405	1.9315
G233T	SNV	chr3:49933605	48.6126	19.6493	21.8056	5.5291	2.1091	2.2944
G233C	SNV	chr3:49933605	49.6219	16.1863	24.147	4.6334	3.4466	1.9647
G233A	SNV	chr3:49933605	50.0311	21.326	20.2275	4.0234	1.2582	3.1338
G234T	SNV	chr3:49933604	46.692	24.9411	20.9624	3.2101	1.6812	2.5132
G234C	SNV	chr3:49933604	57.6829	19.0154	18.4186	2.7877	1.151	0.9444
G234A	SNV	chr3:49933604	45.231	24.8946	22.0239	3.8499	1.2827	2.7179
G235T	SNV	chr3:49933603	50.5952	20.1837	22.5136	2.6786	1.189	2.8399
G235A	SNV	chr3:49933603	51.8028	16.9909	23.3188	3.8112	1.2829	2.7934
A236T	SNV	chr3:49933602	62.4581	12.03	16.71	4.2985	1.8679	2.6355
A236G	SNV	chr3:49933602	62.5171	11.7767	15.9038	5.1051	1.8005	2.8968
A236C	SNV	chr3:49933602	48.5854	13.4812	34.4643	1.3857	1.0536	1.0298
C237T	SNV	chr3:49933601	60.4286	11.9168	19.6758	3.3606	2.2749	2.3434
C237G	SNV	chr3:49933601	58.3441	8.8866	22.8974	5.2294	2.6433	1.9992
A238T	SNV	chr3:49933600	59.5539	11.3774	19.6614	4.7677	2.1228	2.5167
A238G	SNV	chr3:49933600	61.4836	11.4211	17.6082	4.3626	2.4166	2.7078
A238C	SNV	chr3:49933600	62.9638	9.4737	15.9064	7.0853	3.3556	1.2152
G239T	SNV	chr3:49933599	52.2417	16.799	20.754	4.5514	2.0834	3.5707
G239C	SNV	chr3:49933599	55.6211	12.7606	21.9949	4.9635	2.1345	2.5254
G239A	SNV	chr3:49933599	56.7059	14.2777	21.1195	3.621	1.6924	2.5835
T240C	SNV	chr3:49933598	58.4102	13.4308	19.7972	3.7651	1.98	2.6167
T240A	SNV	chr3:49933598	57.8021	12.4332	22.0532	3.5714	1.9122	2.228
T241G	SNV	chr3:49933597	67.5819	10.8356	14.2673	3.5824	1.254	2.4788
T241C	SNV	chr3:49933597	63.0283	10.1927	18.8418	3.5199	1.9462	2.4711
T241A	SNV	chr3:49933597	54.221	15.8285	22.1548	3.6438	1.4878	2.6641
TG242T	DEL	chr3:49933597	64.0234	9.1526	19.0437	4.6349	1.1494	1.9959
G242T	SNV	chr3:49933596	57.3341	13.3647	19.6951	6.4773	1.6575	1.4712
G242C	SNV	chr3:49933596	59.0613	8.492	22.7916	5.9244	1.9408	1.7899
G242A	SNV	chr3:49933596	54.183	8.6276	29.2126	3.7935	1.9747	2.2086
G243T	SNV	chr3:49933595	59.702	7.0895	25.8044	3.7737	1.6488	1.9816
G243A	SNV	chr3:49933595	60.16	8.8467	24.8513	1.9721	1.7375	2.4324
G244T	SNV	chr3:49933594	64.9426	5.6254	21.1787	4.5454	1.1204	2.5876
G244A	SNV	chr3:49933594	62.0926	7.5542	22.3888	4.0589	1.7677	2.1377
G245T	SNV	chr3:49933593	63.4212	9.5075	17.9994	4.1671	2.1807	2.7242
G245C	SNV	chr3:49933593	45.4903	16.013	28.7961	6.0934	1.1269	2.4803
G245A	SNV	chr3:49933593	58.0565	11.0578	22.4676	3.8482	2.1741	2.3959
G245GT	IN	chr3:49933593	4.9194	92.5794	0.986	0.3365	0.0309	1.1478
GA246G	DEL	chr3:49933593	41.3165	24.5918	24.916	3.4398	2.5002	3.2357
A246T	SNV	chr3:49933592	58.8238	13.1792	19.9305	3.4705	1.7228	2.8732
A246G	SNV	chr3:49933592	38.3123	31.5793	23.404	3.3735	0.8632	2.4677
T247G	SNV	chr3:49933591	57.6661	12.6101	21.3971	3.5028	1.7114	3.1125
T247C	SNV	chr3:49933591	56.578	15.0132	18.976	5.6451	1.1131	2.6746
T247A	SNV	chr3:49933591	58.9291	10.1372	21.2326	5.4651	1.7775	2.4586
C248T	SNV	chr3:49933590	58.9187	11.3581	18.9602	4.8247	2.6145	3.3238
C248G	SNV	chr3:49933590	38.7443	16.4976	18.391	15.824	6.8535	3.6896
C248A	SNV	chr3:49933590	60.6966	13.6711	16.9457	4.4282	1.3183	2.94
T249G	SNV	chr3:49933589	56.3225	15.2857	20.156	4.5771	1.3284	2.3304
T249C	SNV	chr3:49933589	54.0595	14.9936	22.3355	3.9044	1.9381	2.7689
T249A	SNV	chr3:49933589	57.1029	13.3513	20.6556	4.2043	1.8036	2.8824
G250T	SNV	chr3:49933588	56.7327	10.1862	23.7981	5.3308	1.6366	2.3157
G250C	SNV	chr3:49933588	58.4869	10.2671	22.1773	4.5344	2.1296	2.4047
G250A	SNV	chr3:49933588	58.7072	11.0207	20.4504	4.9207	2.6339	2.2671
GA251G	DEL	chr3:49933588	48.1615	16.0542	26.3854	3.5197	2.6005	3.2786
A251T	SNV	chr3:49933587	55.968	11.6015	23.6085	4.1831	1.8889	2.75
A251G	SNV	chr3:49933587	56.0338	13.2181	22.4201	3.9696	1.6565	2.702
A251C	SNV	chr3:49933587	54.5956	12.0162	28.1386	3.6949	0.5443	1.0105
A252T	SNV	chr3:49933586	52.7932	15.1767	23.2263	4.296	1.5428	2.9651
A252G	SNV	chr3:49933586	48.8289	22.3481	20.2222	4.5894	1.3476	2.6638
A252C	SNV	chr3:49933586	56.8412	8.5028	22.8417	8.1216	1.7492	1.9434
A253T	SNV	chr3:49933585	59.6087	10.9589	20.6448	4.1334	2.2295	2.4247
A253G	SNV	chr3:49933585	54.7195	15.4738	22.4045	3.4263	1.5348	2.4411
A253C	SNV	chr3:49933585	64.2012	13.8778	15.4996	2.709	1.5891	2.1233
G254T	SNV	chr3:49933584	43.3387	15.2992	33.2043	2.7262	1.7688	3.6628
G254C	SNV	chr3:49933584	56.1189	12.5833	26.0063	2.0716	0.8498	2.3702
G254A	SNV	chr3:49933584	59.2927	8.4993	22.9089	3.6304	2.3415	3.3273
T255G	SNV	chr3:49933583	45.3173	21.4164	24.6351	5.5097	2.8918	0.2296
T255C	SNV	chr3:49933583	61.9586	8.5031	20.4679	4.7402	1.7355	2.5948
T255A	SNV	chr3:49933583	65.0639	8.7783	19.4852	2.7732	1.9543	1.9452
A256T	SNV	chr3:49933582	63.5238	9.5358	18.5178	4.105	1.686	2.6316
A256G	SNV	chr3:49933582	65.6436	7.3254	17.6477	5.1828	1.7524	2.4482
AG257A	DEL	chr3:49933582	56.4191	9.9127	22.963	5.1818	2.1363	3.387
G257T	SNV	chr3:49933581	66.5803	10.2741	15.4815	3.1768	1.8331	2.6543
G257A	SNV	chr3:49933581	61.4938	8.5326	20.5027	4.3302	2.9973	2.1434
G258T	SNV	chr3:49933580	60.2996	9.7755	20.1016	5.6558	1.4462	2.7213
G258A	SNV	chr3:49933580	52.2955	16.9418	22.5688	3.9241	1.276	2.9938
G259T	SNV	chr3:49933579	71.0638	3.2433	14.9418	5.471	3.4376	1.8424
G259C	SNV	chr3:49933579	66.6242	6.0375	12.7985	11.0277	2.2324	1.2797
G259A	SNV	chr3:49933579	60.9554	10.7214	20.8631	3.2118	2.2809	1.9673
G260C	SNV	chr3:49933578	56.121	16.095	21.3567	1.8537	2.6541	1.9194
G260A	SNV	chr3:49933578	55.1964	15.532	21.6153	3.0385	1.3729	3.2449
GC261G	DEL	chr3:49933578	56.7181	8.2616	22.1437	7.7336	1.4125	3.7305
C261T	SNV	chr3:49933577	57.4861	12.3653	21.4738	4.2807	2.0533	2.3407
C261G	SNV	chr3:49933577	52.4316	14.2594	22.3133	4.8771	1.9403	4.1782
C261A	SNV	chr3:49933577	9.0121	67.255	16.6948	3.7043	0.3018	3.032
C262T	SNV	chr3:49933576	63.1691	9.7077	18.4841	4.5327	1.7223	2.384
C262G	SNV	chr3:49933576	75.6396	11.0041	7.6064	4.4812	0.826	0.4428
C262A	SNV	chr3:49933576	56.7031	13.1238	21.083	3.2332	1.9336	3.9232
A263T	SNV	chr3:49933575	62.7359	10.2779	18.5849	3.7734	2.3391	2.2888
A263G	SNV	chr3:49933575	58.523	12.4178	21.2347	3.2909	2.207	2.3266
A263C	SNV	chr3:49933575	69.6847	7.0969	11.6936	4.677	2.9007	3.9472
G264T	SNV	chr3:49933574	73.1906	5.302	13.9835	3.4084	1.8107	2.3048
G264C	SNV	chr3:49933574	71.9931	3.1625	15.2742	4.9783	2.4393	2.1526
G264A	SNV	chr3:49933574	66.876	7.6366	18.316	3.5403	2.1379	1.4933
C265T	SNV	chr3:49933573	59.2219	10.2708	20.7103	5.5305	1.7664	2.5001
C265G	SNV	chr3:49933573	62.3156	4.1142	21.3904	8.0966	2.1066	1.9766
C265A	SNV	chr3:49933573	63.5076	10.4922	17.9558	4.0912	2.6742	1.279
C266T	SNV	chr3:49933572	75.7981	3.7034	13.697	3.2064	1.9952	1.5998
C266G	SNV	chr3:49933572	28.0009	18.7461	26.1691	20.4287	3.8599	2.7953
C266A	SNV	chr3:49933572	50.4012	8.6862	26.889	9.2826	1.5546	3.1864
T267C	SNV	chr3:49933571	63.3484	8.9811	17.8925	6.4476	1.731	1.5994
T267A	SNV	chr3:49933571	72.9532	3.9472	16.2558	2.7825	2.8272	1.234
TA268T	DEL	chr3:49933571	64.3693	5.0208	20.1541	7.5787	1.2787	1.5984
A268T	SNV	chr3:49933570	68.6887	5.6012	15.8881	6.082	1.4502	2.2898
A268G	SNV	chr3:49933570	61.2874	7.0993	19.9199	7.2367	1.693	2.7636
A268C	SNV	chr3:49933570	65.0367	16.8967	11.7065	1.486	1.1999	3.6742
C269T	SNV	chr3:49933569	63.5483	6.5049	20.1533	5.4063	2.2762	2.111
C269G	SNV	chr3:49933569	57.2074	11.6056	19.9678	6.4808	2.5931	2.1454
C269A	SNV	chr3:49933569	79.0119	2.3564	11.079	1.7692	4.3969	1.3866
T270G	SNV	chr3:49933568	63.7713	6.0794	20.8494	5.1958	2.0375	2.0667
T270C	SNV	chr3:49933568	59.2346	10.5439	22.3804	3.5346	1.9773	2.3292
T270A	SNV	chr3:49933568	70.8659	7.7346	15.0882	3.0898	1.9686	1.2528
TG271T	DEL	chr3:49933568	53.6871	7.5616	24.0077	8.5562	1.749	4.4384
G271T	SNV	chr3:49933567	71.1379	3.7902	16.1546	5.2792	2.2289	1.4091
G271C	SNV	chr3:49933567	62.2891	6.721	19.9678	3.2594	2.7797	4.983
G271A	SNV	chr3:49933567	75.2882	4.504	12.9662	3.0657	3.0401	1.1357
G272T	SNV	chr3:49933566	74.5058	3.1583	13.4418	5.0731	2.3869	1.4342
G272C	SNV	chr3:49933566	57.8285	16.3875	14.2706	7.6738	0.6702	3.1695
G272A	SNV	chr3:49933566	76.0792	1.9917	10.5862	4.9134	5.1028	1.3267
C273T	SNV	chr3:49933565	62.0264	9.0873	20.5832	3.4281	2.5887	2.2862
C273G	SNV	chr3:49933565	54.606	14.741	21.3436	4.563	1.9265	2.82
C273A	SNV	chr3:49933565	73.554	4.8019	14.8896	2.4856	2.7559	1.513
T274G	SNV	chr3:49933564	72.5652	3.8698	17.6278	0.3642	4.2533	1.3196
T274C	SNV	chr3:49933564	63.6334	9.8647	18.9581	3.5768	1.9936	1.9733
T274A	SNV	chr3:49933564	60.8056	11.1193	20.471	3.372	1.5903	2.6419
TG275T	DEL	chr3:49933564	42.5458	17.5003	27.3269	6.6558	1.6703	4.301
G275T	SNV	chr3:49933563	62.6323	8.8479	18.6508	4.2733	2.6164	2.9793
G275C	SNV	chr3:49933563	70.3528	5.7758	18.8125	1.8597	2.409	0.7902
G275A	SNV	chr3:49933563	64.3738	10.9571	16.0575	4.484	1.4782	2.6494
G276T	SNV	chr3:49933562	64.3442	8.3157	17.8676	5.4422	1.7418	2.2886
G276C	SNV	chr3:49933562	50.7611	11.8031	27.474	4.3416	2.0862	3.534
G276A	SNV	chr3:49933562	75.173	3.6627	11.5463	4.8988	2.7233	1.9958
T277G	SNV	chr3:49933561	35.7444	37.7918	14.8682	5.2194	0.9203	5.456
T277C	SNV	chr3:49933561	51.5045	15.1548	21.9089	6.5836	1.2677	3.5806
T277A	SNV	chr3:49933561	51.1934	15.0994	24.0308	4.8269	1.481	3.3686
C278T	SNV	chr3:49933560	63.7448	8.2256	17.0803	6.2524	2.2042	2.4927
C278G	SNV	chr3:49933560	45.5171	24.2838	19.4333	5.0741	1.2289	4.4628
C278A	SNV	chr3:49933560	57.7453	13.9064	19.9329	5.43	1.3293	1.6561
C279T	SNV	chr3:49933559	50.0572	18.5196	23.6636	2.7906	1.6643	3.3047
C279A	SNV	chr3:49933559	54.7813	12.0324	20.2959	4.8425	3.4168	4.631
CT280C	DEL	chr3:49933559	5.8327	48.4929	32.1504	8.3724	0.2645	4.8871
T280G	SNV	chr3:49933558	2.3236	61.9526	31.1873	1.3933	0.2629	2.8803
T280C	SNV	chr3:49933558	13.6236	40.5667	37.5288	3.5529	0.5659	4.1621
T280A	SNV	chr3:49933558	14.5514	49.0114	29.0765	2.9693	0.61	3.7814
C281T	SNV	chr3:49933557	55.9263	13.6342	20.9304	5.4533	1.7792	2.2767
C281A	SNV	chr3:49933557	62.4939	9.5216	18.3136	5.8798	2.0109	1.7801
A282T	SNV	chr3:49933556	32.5438	28.9753	32.9733	2.1785	0.7457	2.5834
A282G	SNV	chr3:49933556	8.0642	52.8974	34.8556	1.1583	0.3096	2.7149
A282C	SNV	chr3:49933556	15.8398	32.481	45.3249	2.9304	0.2426	3.1813
T283C	SNV	chr3:49933555	50.8164	12.6202	25.7522	6.4646	1.1417	3.2048
T283A	SNV	chr3:49933555	4.7742	57.9498	31.5055	1.5798	0.4827	3.7079
G284T	SNV	chr3:49933554	80.6039	3.7689	11.2679	2.067	1.5399	0.7522
G284A	SNV	chr3:49933554	64.6656	7.2999	19.371	4.63	2.1517	1.8819
A285T	SNV	chr3:49933553	59.6424	9.5126	20.1937	6.1361	1.6991	2.8162
A285G	SNV	chr3:49933553	41.5603	29.171	21.9043	2.9292	1.1094	3.3259
AC286A	DEL	chr3:49933553	36.6619	13.0512	42.5241	4.0761	1.1797	2.5071
C286T	SNV	chr3:49933552	42.1185	26.1071	24.6334	2.7656	1.5655	2.8098
C286G	SNV	chr3:49933552	33.9192	29.3985	30.7277	2.1304	0.6134	3.2108
C286A	SNV	chr3:49933552	57.1366	11.0578	23.0144	3.5399	1.7717	3.4797
C287T	SNV	chr3:49933551	77.1564	1.5433	11.6477	5.9105	2.2948	1.4473
C287G	SNV	chr3:49933551	59.5877	14.0541	18.153	3.4187	1.5962	3.1903
C287A	SNV	chr3:49933551	63.4798	7.4177	20.0186	5.2223	1.8824	1.9793
C288T	SNV	chr3:49933550	69.8849	4.9638	15.814	4.4401	2.4737	2.4234
C288A	SNV	chr3:49933550	47.1944	19.3758	27.2959	2.8497	1.1863	2.0979
T289C	SNV	chr3:49933549	13.9036	57.4958	24.1752	0.8708	0.4319	3.1226
T289A	SNV	chr3:49933549	17.1986	46.5326	31.7126	1.3506	0.6333	2.5724
C290T	SNV	chr3:49933548	60.8332	11.4886	20.022	2.3293	3.1089	2.2181
C290A	SNV	chr3:49933548	29.6042	38.6566	24.7856	2.6888	1.5907	2.6741
T291C	SNV	chr3:49933547	14.7449	50.405	29.3241	1.9278	1.0409	2.5573
T291A	SNV	chr3:49933547	5.7328	65.7902	25.3359	0.2041	0.2283	2.7088
C292T	SNV	chr3:49933546	73.6872	4.0742	14.1571	2.9573	4.016	1.1081
C292G	SNV	chr3:49933546	9.2641	56.8701	29.9164	0.7912	0.2439	2.9142
C292A	SNV	chr3:49933546	8.7202	59.1205	28.5148	0.7453	0.3324	2.5668
T293G	SNV	chr3:49933545	3.1477	85.1338	5.4295	3.237	0.2199	2.8321
T293C	SNV	chr3:49933545	66.046	7.1829	18.7806	4.1695	1.768	2.053
T293A	SNV	chr3:49933545	2.9319	56.1583	30.4588	0.9958	0.1965	9.2587
G294T	SNV	chr3:49933544	38.335	29.9394	25.5984	2.7912	0.8139	2.5221
G294C	SNV	chr3:49933544	48.0128	20.4729	25.3405	1.8009	1.5434	2.8296
G294A	SNV	chr3:49933544	69.1623	8.1896	14.8223	3.9263	1.7152	2.1845
C295T	SNV	chr3:49933543	35.6308	37.7948	19.9341	2.6448	0.6905	3.3049
C295G	SNV	chr3:49933543	0.3999	85.989	12.4219	0.0192	0.2285	0.9415
C295A	SNV	chr3:49933543	1.1487	82.8569	14.6392	0.1569	0.1089	1.0895
CA296C	DEL	chr3:49933543	0.7261	85.1723	13.5986	0.0214	0.064	0.4176
A296T	SNV	chr3:49933542	0.5114	86.311	12.0977	0.021	0.0872	0.9718
A296G	SNV	chr3:49933542	0.6737	85.1628	11.8017	0.0606	0.0987	2.2025
A296C	SNV	chr3:49933542	0.4936	84.3216	13.9788	0.0223	0.1091	1.0745
G297T	SNV	chr3:49933541	0.908	87.1059	10.4733	0.0675	0.0981	1.3472
G297C	SNV	chr3:49933541	0.7026	87.1272	11.0078	0.0605	0.0246	1.0773
G297A	SNV	chr3:49933541	0.5171	85.5279	12.7632	0.0257	0.0843	1.0818
G298T	SNV	chr3:49933540	3.2467	74.502	19.5304	0.3885	0.3139	2.0186
G298C	SNV	chr3:49933540	5.0834	69.7056	23.5807	0.102	0.3452	1.1831
G298A	SNV	chr3:49933540	10.6809	58.8948	26.3498	1.0309	0.344	2.6996
A299T	SNV	chr3:49933539	64.9988	7.4993	18.1819	3.905	3.2215	2.1935
A299G	SNV	chr3:49933539	6.7422	71.7913	17.4253	0.7729	0.259	3.0092
T300C	SNV	chr3:49933538	77.2704	6.8482	9.9924	2.1338	2.0527	1.7025
T300A	SNV	chr3:49933538	63.4644	5.3195	23.1139	3.8959	2.2375	1.9688
A301T	SNV	chr3:49933537	63.2077	11.4131	18.5616	2.4113	1.6542	2.752
A301G	SNV	chr3:49933537	55.2044	12.5091	23.3138	4.2797	2.1485	2.5446
T302C	SNV	chr3:49933536	65.69	7.0169	17.5282	4.9579	2.6554	2.1517
T302A	SNV	chr3:49933536	57.3899	14.3064	18.4685	4.5781	2.1358	3.1213
T303C	SNV	chr3:49933535	77.5541	2.6538	11.419	3.787	2.9197	1.6664
T303A	SNV	chr3:49933535	66.2175	5.6898	16.6464	4.3287	3.4237	3.6939
TG304T	DEL	chr3:49933535	69.2781	4.9086	15.0634	5.1808	3.6591	1.91
G304T	SNV	chr3:49933534	79.405	1.7357	9.4703	3.872	1.3075	4.2095
G304A	SNV	chr3:49933534	71.9567	3.1692	16.7861	3.6744	2.9029	1.5108
G305T	SNV	chr3:49933533	76.9891	1.8892	12.7966	3.4796	3.4074	1.4381
G305C	SNV	chr3:49933533	72.1272	1.3359	13.016	7.0817	5.0585	1.3807
G305A	SNV	chr3:49933533	79.1292	1.3255	12.2373	3.5171	2.9221	0.8689
G306T	SNV	chr3:49933532	81.3014	2.0812	10.7189	2.7838	1.8776	1.2371
G306C	SNV	chr3:49933532	81.4309	1.285	10.2842	3.1947	2.5691	1.2362
G306A	SNV	chr3:49933532	79.4679	0.7532	9.829	4.7595	4.1388	1.0516
C307T	SNV	chr3:49933531	20.872	46.3098	25.9217	2.8112	0.8034	3.282
C307G	SNV	chr3:49933531	3.4994	73.265	20.2546	0.2758	0.2266	2.4785
C307A	SNV	chr3:49933531	47.7281	20.0125	24.5205	3.7867	1.324	2.6282
T308G	SNV	chr3:49933530	42.8292	24.9264	23.2922	3.4344	1.5328	3.9849
T308C	SNV	chr3:49933530	76.4	2.8165	12.1071	4.0587	3.1222	1.4955
T308A	SNV	chr3:49933530	58.7493	9.6177	21.6559	4.5219	2.6307	2.8246
TG309T	DEL	chr3:49933530	68.8099	3.6609	16.4556	5.7176	3.5286	1.8274
G309T	SNV	chr3:49933529	68.2418	1.8292	21.6441	1.6269	5.3717	1.2864
G309C	SNV	chr3:49933529	84.5705	0.4014	10.9785	2.0378	1.8102	0.2017
G309A	SNV	chr3:49933529	62.6652	6.152	22.7512	4.0422	2.5961	1.7932
G310T	SNV	chr3:49933528	77.5765	1.89	11.512	3.6673	3.4256	1.9285
G310A	SNV	chr3:49933528	80.1531	1.6505	10.2248	4.07	2.5777	1.3239
G311T	SNV	chr3:49933527	83.2023	5.1677	6.5717	2.5094	0.9464	1.6024
G311A	SNV	chr3:49933527	82.6961	0.8926	8.2706	3.0794	3.9791	1.0822
C312T	SNV	chr3:49933526	36.138	32.5254	23.2368	3.5882	0.945	3.5667
C312A	SNV	chr3:49933526	58.515	11.5918	21.1288	4.4272	2.3016	2.0356
G313T	SNV	chr3:49933525	29.8078	38.7156	25.1947	2.5351	0.6547	3.0921
G313C	SNV	chr3:49933525	60.5849	9.1553	18.6318	6.8947	2.197	2.5362
G313A	SNV	chr3:49933525	35.6135	31.269	25.8322	3.28	1.106	2.8993
C314T	SNV	chr3:49933524	38.9692	16.867	33.018	4.0148	1.5236	5.6075
C314A	SNV	chr3:49933524	46.7273	20.7331	23.9008	4.4525	1.7046	2.4818
T315G	SNV	chr3:49933523	43.4809	23.4881	23.8683	3.6468	1.6946	3.8213
T315C	SNV	chr3:49933523	69.4577	6.7568	16.5055	3.9144	2.0737	1.2918
T315A	SNV	chr3:49933523	47.9401	19.6188	24.1765	4.2266	1.3261	2.7119
G316T	SNV	chr3:49933522	44.5763	25.9819	22.3113	3.1406	1.656	2.334
G316C	SNV	chr3:49933522	43.0415	29.892	17.9592	1.7859	3.0125	4.309
G316A	SNV	chr3:49933522	48.2618	20.3931	24.7614	2.0544	1.71	2.8192
T317G	SNV	chr3:49933521	8.2296	56.4067	22.6517	1.3175	2.1001	9.2943
T317C	SNV	chr3:49933521	72.1659	3.7933	13.5336	5.2586	3.2776	1.9709
T317A	SNV	chr3:49933521	49.7434	14.722	26.3707	5.1119	2.0133	2.0387
G318T	SNV	chr3:49933520	66.5532	5.5434	20.001	3.4644	2.3305	2.1074
G318C	SNV	chr3:49933520	71.9048	4.3696	16.6133	2.7088	2.2878	2.1158
G318A	SNV	chr3:49933520	51.437	17.7371	23.9968	2.4956	1.8052	2.5282
G319T	SNV	chr3:49933519	51.3584	17.4122	23.4057	3.1179	0.9002	3.8055
G319C	SNV	chr3:49933519	53.6262	12.6635	20.7806	7.7824	1.7089	3.4384
G319A	SNV	chr3:49933519	67.2629	8.9719	16.1227	3.1755	2.1617	2.3053
C320T	SNV	chr3:49933518	29.867	39.3159	23.2267	3.5068	0.9083	3.1753
C320G	SNV	chr3:49933518	3.6744	80.2846	13.8306	0.4559	0.1371	1.6172
C320A	SNV	chr3:49933518	47.2292	15.648	27.6822	5.16	2.0879	2.1926
T321G	SNV	chr3:49933517	53.7122	13.5265	22.7839	5.1314	2.0244	2.8216
T321C	SNV	chr3:49933517	68.2397	6.2854	16.5748	4.4091	2.4443	2.0466
T321A	SNV	chr3:49933517	46.1532	21.4836	23.7455	4.5041	1.6391	2.4745
G322T	SNV	chr3:49933516	28.247	38.8295	23.8795	5.7209	0.8186	2.5045
G322C	SNV	chr3:49933516	46.482	20.7826	24.5956	4.3278	1.6867	2.1253
G322A	SNV	chr3:49933516	30.5413	38.823	22.9175	3.6969	0.7163	3.305
A323T	SNV	chr3:49933515	53.7338	17.2883	20.8182	4.1689	1.3485	2.6423
A323G	SNV	chr3:49933515	38.5923	31.3529	22.6831	2.7044	0.8851	3.7821
A323C	SNV	chr3:49933515	63.8721	10.2594	18.3199	2.9439	1.274	3.3307
C324T	SNV	chr3:49933514	43.4775	26.3554	21.9958	3.2396	1.4445	3.4871
C324A	SNV	chr3:49933514	50.6109	25.1638	16.0385	3.566	1.254	3.3668
T325G	SNV	chr3:49933513	66.3406	2.4126	10.6498	17.9513	1.3843	1.2614
T325C	SNV	chr3:49933513	78.5211	3.6851	10.3065	3.8138	1.7498	1.9237
T325A	SNV	chr3:49933513	46.4415	20.0635	25.4525	3.5097	1.5065	3.0264
TG326T	DEL	chr3:49933513	56.4526	16.5952	18.3149	5.1766	0.699	2.7618
G326T	SNV	chr3:49933512	54.3073	14.0095	21.6496	5.2779	1.6497	3.1059
G326C	SNV	chr3:49933512	64.157	7.8907	20.9575	3.5248	1.3716	2.0984
G326A	SNV	chr3:49933512	52.5153	16.8183	21.9258	3.658	1.6069	3.4757
T327G	SNV	chr3:49933511	29.9399	45.6737	18.131	0.2964	0.2434	5.7156
T327C	SNV	chr3:49933511	77.6157	2.1367	12.0554	3.6062	3.153	1.4331
T327A	SNV	chr3:49933511	62.9752	8.517	19.9263	4.5106	2.0155	2.0555
G328T	SNV	chr3:49933510	64.1862	8.7195	19.9949	2.5991	1.8063	2.694
G328C	SNV	chr3:49933510	75.159	4.6035	12.9844	2.5082	2.8369	1.9079
G328A	SNV	chr3:49933510	60.8952	13.1349	18.751	3.123	1.5278	2.5681
T329G	SNV	chr3:49933509	40.7971	27.9789	22.1281	4.1582	1.4016	3.5361
T329C	SNV	chr3:49933509	76.9281	2.2661	12.3621	4.0884	2.807	1.5483
T329A	SNV	chr3:49933509	72.2857	4.7262	15.4328	3.7933	2.2941	1.4679
TG330T	DEL	chr3:49933509	78.8121	1.9646	9.7602	5.2687	3.0898	1.1047
G330T	SNV	chr3:49933508	77.2556	1.6622	14.4299	1.9548	3.4753	1.2222
G330C	SNV	chr3:49933508	79.425	1.6456	10.0235	3.3564	5.2779	0.2716
G330A	SNV	chr3:49933508	54.0179	6.5352	30.781	4.0165	2.059	2.5903
G331T	SNV	chr3:49933507	76.135	2.3373	12.3854	4.6117	3.0982	1.4324
G331C	SNV	chr3:49933507	79.6201	1.239	9.9338	3.8012	4.0775	1.3285
G331A	SNV	chr3:49933507	71.8764	1.4325	16.8312	3.1204	4.472	2.2676
G332C	SNV	chr3:49933506	71.5887	3.9153	12.5178	5.8623	2.8343	3.2816
G332A	SNV	chr3:49933506	82.302	0.9777	8.4964	3.5215	3.4139	1.2885
T333C	SNV	chr3:49933505	73.2649	3.6485	14.8319	3.9463	2.7076	1.6008
T333A	SNV	chr3:49933505	72.7851	3.9361	14.4331	3.7666	2.9063	2.1728
A334T	SNV	chr3:49933504	53.7745	10.9271	25.1003	4.11	2.0806	4.0075
A334G	SNV	chr3:49933504	62.8326	10.1382	18.4089	4.6057	1.3189	2.6957
T335C	SNV	chr3:49933503	64.0768	9.6602	18.1224	4.5269	1.9037	1.71
T335A	SNV	chr3:49933503	49.3409	16.5778	24.9755	3.8935	1.498	3.7143
C336T	SNV	chr3:49933502	16.46	55.3621	22.2429	2.1839	0.5436	3.2076
C336A	SNV	chr3:49933502	69.0134	10.7144	12.6141	1.9975	4.0176	1.643
A337T	SNV	chr3:49933501	56.6985	14.5731	19.9485	4.4107	1.4657	2.9034
A337G	SNV	chr3:49933501	68.9263	6.0274	17.1961	3.8145	2.0488	1.9869
A337C	SNV	chr3:49933501	54.492	13.583	25.097	3.5791	1.9718	1.277
A338T	SNV	chr3:49933500	57.5035	11.2762	22.2772	4.6023	2.0544	2.2864
A338G	SNV	chr3:49933500	49.8597	18.6913	22.6836	3.406	1.7735	3.5859
A338C	SNV	chr3:49933500	61.6541	11.9409	19.0796	4.2923	1.2944	1.7387
C339T	SNV	chr3:49933499	16.9588	53.1505	24.883	1.715	0.7144	2.5783
C339A	SNV	chr3:49933499	14.7426	54.364	25.1592	1.5726	0.9802	3.1814
G340T	SNV	chr3:49933498	48.199	20.2717	18.843	7.9122	1.3014	3.4727
G340C	SNV	chr3:49933498	45.2209	20.4646	30.2856	1.4896	0.148	2.3912
G340A	SNV	chr3:49933498	43.9871	23.4317	24.3765	3.9937	1.5291	2.6819
T341G	SNV	chr3:49933497	10.7572	61.5912	22.3682	1.3429	0.4823	3.4582
T341C	SNV	chr3:49933497	68.4043	6.0192	16.3991	4.3309	2.4457	2.4009
T341A	SNV	chr3:49933497	61.0482	13.6846	18.9041	3.1513	1.329	1.8829
G342T	SNV	chr3:49933496	54.1868	16.5997	22.3338	2.8116	0.9946	3.0736
G342A	SNV	chr3:49933496	36.6445	29.9341	23.6622	4.7895	1.5138	3.4559
A343T	SNV	chr3:49933495	46.2006	23.0044	22.5849	3.8005	1.5376	2.872
A343G	SNV	chr3:49933495	54.8867	16.9692	19.0985	4.6591	1.5156	2.8709
A343C	SNV	chr3:49933495	46.5101	23.5868	19.7354	6.3175	0.8723	2.9779
AC344A	DEL	chr3:49933495	67.8066	5.2298	16.7331	7.9288	0.8028	1.499
C344T	SNV	chr3:49933494	53.9961	14.4361	23.0263	3.5861	1.6959	3.2594
C344G	SNV	chr3:49933494	41.8424	23.3392	22.8311	1.4338	0.8192	9.7343
C344A	SNV	chr3:49933494	15.8265	55.0776	25.2451	2.1915	0.532	1.1272
C345T	SNV	chr3:49933493	39.2743	25.6922	27.6572	3.0964	1.2335	3.0464
C345G	SNV	chr3:49933493	44.6922	29.7938	19.0247	2.1387	0.8277	3.5229
C345A	SNV	chr3:49933493	37.4848	30.6989	24.6295	3.0346	1.0281	3.1241
G346T	SNV	chr3:49933492	64.147	10.0117	16.5474	4.678	2.0266	2.5893
G346C	SNV	chr3:49933492	57.3122	15.9217	17.835	3.7712	1.9268	3.2331
G346A	SNV	chr3:49933492	66.8243	6.9008	18.3435	3.3685	2.1646	2.3982
T347G	SNV	chr3:49933491	38.1657	31.2606	22.6604	3.7203	1.2994	2.8937
T347C	SNV	chr3:49933491	70.8494	5.0579	15.3067	4.4073	2.822	1.5567
T347A	SNV	chr3:49933491	69.4257	5.732	16.9329	3.1469	2.7384	2.024
TG348T	DEL	chr3:49933491	63.1453	4.2412	23.5128	2.5338	4.5285	2.0384
G348T	SNV	chr3:49933490	63.2142	4.8599	23.4118	4.0023	2.4744	2.0374
G348C	SNV	chr3:49933490	82.0196	0.2012	6.2407	8.8772	2.382	0.2793
G349T	SNV	chr3:49933489	59.7496	7.4379	24.8855	3.9537	2.221	1.7524
G349C	SNV	chr3:49933489	37.1591	25.0044	30.1253	3.6551	0.9101	3.146
G349A	SNV	chr3:49933489	78.0374	1.1575	11.6263	3.8394	3.4892	1.8502
G350C	SNV	chr3:49933488	38.0269	13.9054	39.3139	3.6115	2.1436	2.9988
G350A	SNV	chr3:49933488	83.0341	0.4689	7.789	3.8478	3.6901	1.17
G350GT	IN	chr3:49933488	34.702	5.8432	26.6242	2.6257	25.4806	4.7244
GT351G	DEL	chr3:49933488	64.5627	3.8235	23.1598	5.6708	1.7764	1.0067
T351C	SNV	chr3:49933487	64.6823	5.7678	21.238	4.2282	2.1649	1.9189
T351A	SNV	chr3:49933487	76.8281	2.5706	12.8114	3.3138	2.7334	1.7427
TG352T	DEL	chr3:49933487	55.8408	8.9372	24.1411	4.0994	3.2516	3.7299
G352T	SNV	chr3:49933486	68.8431	6.3857	17.3499	4.1479	1.7322	1.5413
G352C	SNV	chr3:49933486	76.2137	2.9527	11.4807	4.9314	2.7295	1.6921
G352A	SNV	chr3:49933486	56.2274	12.9164	23.7906	3.8732	1.3551	1.8373
G353T	SNV	chr3:49933485	79.6175	2.7505	10.398	2.1404	3.812	1.2816
G353C	SNV	chr3:49933485	67.8586	3.334	19.7776	4.8063	2.6523	1.5712
G353A	SNV	chr3:49933485	77.3191	1.6127	11.5828	5.4602	2.772	1.2532
GT354G	DEL	chr3:49933485	8.7377	73.5127	11.3641	1.3415	1.4638	3.5801
T354G	SNV	chr3:49933484	55.9217	12.8148	18.4271	4.4283	4.1589	4.2492
T354C	SNV	chr3:49933484	49.2222	15.3538	27.1146	3.8743	1.7846	2.6505
T354A	SNV	chr3:49933484	72.4168	4.6242	14.4401	4.0114	2.4786	2.0289
G355T	SNV	chr3:49933483	20.8288	43.393	30.5424	0.1907	0.4858	4.5593
G355C	SNV	chr3:49933483	39.6705	19.9533	24.3402	13.1604	1.6377	1.2379
G355A	SNV	chr3:49933483	40.124	26.401	27.0107	2.8309	1.95	1.6834
GA356G	DEL	chr3:49933483	47.2308	16.2381	30.1297	3.7154	0.854	1.832
A356T	SNV	chr3:49933482	51.7534	17.6235	21.7394	4.4154	1.595	2.8733
A356G	SNV	chr3:49933482	6.046	73.3919	16.8066	0.8507	0.1915	2.7132
G357T	SNV	chr3:49933481	36.3772	35.2593	22.5939	3.1126	0.3579	2.299
G357A	SNV	chr3:49933481	53.0813	14.0898	24.7038	4.203	2.1189	1.8032
A358T	SNV	chr3:49933480	33.9366	31.6356	27.4294	1.4731	2.6476	2.8777
A358G	SNV	chr3:49933480	3.9278	76.5816	16.3378	0.3953	0.1375	2.6201
A358C	SNV	chr3:49933480	50.8216	16.4144	23.062	4.678	1.9269	3.097
G359T	SNV	chr3:49933479	64.0331	9.713	18.5167	3.3667	1.7888	2.5818
G359C	SNV	chr3:49933479	58.9459	8.0215	26.3564	1.9346	2.8491	1.8925
G359A	SNV	chr3:49933479	52.7145	13.313	23.4899	4.8349	1.7342	3.9135
C360T	SNV	chr3:49933478	39.6974	27.5466	23.6851	3.9599	1.172	3.939
C360A	SNV	chr3:49933478	56.7071	15.2255	19.3025	3.9023	1.4837	3.3789
T361G	SNV	chr3:49933477	61.8398	7.0398	25.5108	1.2942	0.7563	3.5591
T361C	SNV	chr3:49933477	53.3842	14.9644	21.6022	4.4266	1.7517	3.871
T361A	SNV	chr3:49933477	49.5148	20.7238	21.5793	3.6244	1.4851	3.0725
G362T	SNV	chr3:49933476	38.0432	13.9147	31.6815	7.9585	2.0143	6.3878
G362C	SNV	chr3:49933476	24.6994	48.3222	19.7867	4.0823	0.6847	2.4248
G362A	SNV	chr3:49933476	53.151	18.0452	21.3608	3.6872	1.5183	2.2375
GC363G	DEL	chr3:49933476	47.9508	19.5142	23.5887	4.8601	0.9782	3.108
C363T	SNV	chr3:49933475	45.8583	23.7239	22.7142	3.1832	1.4143	3.1059
C363G	SNV	chr3:49933475	38.1904	21.3235	32.5983	3.4695	2.5567	1.8616
C363A	SNV	chr3:49933475	54.6175	14.3241	21.6596	4.9518	0.9673	3.4798
C364T	SNV	chr3:49933474	36.5082	32.6183	23.7736	2.2072	1.322	3.5707
C364G	SNV	chr3:49933474	40.3376	19.0209	21.2848	14.7676	3.6342	0.9549
C364A	SNV	chr3:49933474	59.5414	9.3903	22.9356	2.5733	2.4682	3.0912
A365T	SNV	chr3:49933473	44.8867	23.0338	23.6409	3.7822	1.2983	3.3581
A365G	SNV	chr3:49933473	62.9903	9.689	19.472	4.333	1.7333	1.7825
A365C	SNV	chr3:49933473	34.6334	22.6257	36.8763	2.8818	0.6965	2.2862
G366T	SNV	chr3:49933472	55.6213	15.0412	21.6958	3.8207	1.463	2.358
G366C	SNV	chr3:49933472	34.7072	28.1605	28.9935	4.5965	1.0038	2.5385
G366A	SNV	chr3:49933472	51.1311	19.8081	20.953	3.3744	1.8264	2.9069
C367T	SNV	chr3:49933471	51.3037	21.666	19.0325	3.3026	1.5174	3.1777
C367G	SNV	chr3:49933471	57.1273	17.0289	18.4084	3.572	1.8194	2.0441
C367A	SNV	chr3:49933471	67.9477	7.4386	15.9171	4.5042	1.898	2.2943
C367CA	IN	chr3:49933471	68.3479	5.6174	17.8232	3.1045	3.2823	1.8248
A368T	SNV	chr3:49933470	44.9659	21.9599	24.5791	3.4282	1.3117	3.7553
A368G	SNV	chr3:49933470	61.2105	9.3761	20.0332	4.3658	2.2855	2.7289
A368C	SNV	chr3:49933470	46.3716	23.6372	21.6145	4.3166	1.6534	2.4066
C369T	SNV	chr3:49933469	44.2812	23.3166	25.6702	2.7237	1.4038	2.6045
C369G	SNV	chr3:49933469	58.9973	11.5268	20.5449	4.9533	1.8267	2.151
C369A	SNV	chr3:49933469	64.7821	5.9501	18.7436	5.144	3.133	2.2472
G370T	SNV	chr3:49933468	25.7208	43.5063	24.2931	2.2441	0.9909	3.2448
G370A	SNV	chr3:49933468	53.5742	16.1542	22.6178	3.723	1.6252	2.3056
A371T	SNV	chr3:49933467	50.7934	16.8937	24.5863	3.4585	1.8018	2.4663
A371G	SNV	chr3:49933467	18.6362	43.7956	31.1359	2.6662	0.7163	3.0498
G372A	SNV	chr3:49933466	52.9308	18.2987	20.6666	2.2877	2.7708	3.0454
GT373G	DEL	chr3:49933466	41.0933	17.1854	29.2195	9.4846	0.9379	2.0793
T373C	SNV	chr3:49933465	52.2889	15.0678	23.4252	5.1454	1.7627	2.31
T373A	SNV	chr3:49933465	68.2279	6.7133	17.2827	3.6571	2.4024	1.7167
T374G	SNV	chr3:49933464	48.2328	10.1983	29.7039	4.745	2.2829	4.8371
T374C	SNV	chr3:49933464	39.6516	26.3024	26.1796	4.0882	1.4064	2.3718
T374A	SNV	chr3:49933464	59.1536	12.5601	20.086	3.7584	1.3686	3.0733
TC375T	DEL	chr3:49933464	52.8109	14.1429	19.8678	5.4592	1.6539	6.0652
C375T	SNV	chr3:49933463	45.7204	20.2553	25.8378	3.0841	1.5283	3.5741
C375G	SNV	chr3:49933463	50.9919	19.1544	22.4949	2.8847	2.8353	1.6387
C375A	SNV	chr3:49933463	35.4251	29.4032	24.8663	4.0241	1.1035	5.1778
C376T	SNV	chr3:49933462	44.2375	23.1236	23.7726	3.8248	1.1913	3.8502
C376G	SNV	chr3:49933462	39.8497	35.598	17.9468	1.9161	0.9877	3.7017
C376A	SNV	chr3:49933462	50.537	16.8591	23.473	3.1967	2.2497	3.6845
C376CG	IN	chr3:49933462	40.3351	28.8091	24.1906	2.9964	1.2244	2.4445
CG377C	DEL	chr3:49933462	62.7453	6.0375	19.8389	6.183	2.6903	2.505
G377T	SNV	chr3:49933461	69.768	6.4124	15.5388	4.7207	1.8903	1.6699
G377C	SNV	chr3:49933461	59.0048	9.5783	20.7461	7.8131	1.1099	1.7479
G377A	SNV	chr3:49933461	63.18	6.2007	22.1786	3.4135	2.6035	2.4238
G378T	SNV	chr3:49933460	67.0224	5.6309	17.0413	3.5236	1.0516	5.7302
G378A	SNV	chr3:49933460	70.1542	3.7759	17.2799	4.021	2.1204	2.6486
G379T	SNV	chr3:49933459	68.4117	3.4876	16.5212	4.2848	2.3719	4.9227
G379A	SNV	chr3:49933459	77.6168	1.4312	10.9357	4.775	2.732	2.5093
G380T	SNV	chr3:49933458	62.372	4.312	22.2208	6.1295	2.101	2.8647
G380C	SNV	chr3:49933458	79.9164	5.2219	10.0603	1.3469	2.5369	0.9175
G380A	SNV	chr3:49933458	74.9715	3.0328	12.791	3.4412	2.7836	2.98
G380GA	IN	chr3:49933458	62.4887	9.6183	19.2365	3.8373	2.2543	2.5649
G381C	SNV	chr3:49933457	66.7687	3.038	19.361	5.2899	2.2065	3.3359
G381A	SNV	chr3:49933457	69.9211	2.9871	17.3808	4.0803	2.7437	2.887
G382T	SNV	chr3:49933456	39.4931	24.7735	29.0327	1.3802	0.2295	5.091
G382A	SNV	chr3:49933456	57.7745	8.3954	23.6927	3.3281	2.5233	4.2859
A383T	SNV	chr3:49933455	35.9085	30.8729	23.4233	2.3164	0.7717	6.7073
A383G	SNV	chr3:49933455	59.4441	11.5303	21.3148	4.277	2.0247	1.4091
A383C	SNV	chr3:49933455	56.6478	9.2796	26.2219	3.8442	2.4071	1.5994
C384T	SNV	chr3:49933454	33.8203	36.3297	23.0037	3.0833	1.1265	2.6366
C384G	SNV	chr3:49933454	35.6956	33.3504	21.4602	1.9184	4.9392	2.6363
C384A	SNV	chr3:49933454	36.4586	33.8843	22.1737	2.9293	1.2422	3.3119
A385T	SNV	chr3:49933453	51.4771	14.619	26.063	3.1748	1.8387	2.8273
A385G	SNV	chr3:49933453	60.6147	12.5143	19.0243	4.4129	1.7677	1.6661
A385C	SNV	chr3:49933453	54.6956	13.0076	23.8698	6.6426	1.1058	0.6785
T386G	SNV	chr3:49933452	57.0728	8.8185	19.6666	10.4581	2.0152	1.9689
T386C	SNV	chr3:49933452	64.4771	8.518	19.1892	3.5649	2.0774	2.1734
T386A	SNV	chr3:49933452	61.8767	11.8964	19.0489	3.4004	1.8877	1.8899
TG387T	DEL	chr3:49933452	60.6204	11.028	20.3833	3.7249	1.5299	2.7134
G387T	SNV	chr3:49933451	51.4668	15.8042	22.7348	4.8153	1.7279	3.451
G387A	SNV	chr3:49933451	39.8032	28.6914	24.9614	3.0025	0.9163	2.6251
G388T	SNV	chr3:49933450	54.4841	11.6931	23.3191	5.2936	1.3994	3.8108
G388C	SNV	chr3:49933450	56.4736	13.4299	21.1177	4.2314	2.0567	2.6908
G388A	SNV	chr3:49933450	60.9943	8.1211	19.0919	3.3084	1.4689	7.0155
GT389G	DEL	chr3:49933450	58.6922	11.0164	22.4988	3.5862	2.013	2.1932
T389G	SNV	chr3:49933449	53.4269	18.2302	19.948	4.5093	1.3208	2.565
T389C	SNV	chr3:49933449	67.6633	4.2288	19.0728	5.3815	2.132	1.5217
T389A	SNV	chr3:49933449	75.8874	2.2545	13.0431	4.2436	2.7499	1.8214
T390G	SNV	chr3:49933448	57.0115	12.5904	21.7017	3.978	1.5003	3.2182
T390C	SNV	chr3:49933448	71.306	3.5643	15.8093	5.2113	2.5503	1.5589
T390A	SNV	chr3:49933448	38.8848	30.5171	24.4105	2.8464	1.1083	2.2328
G391T	SNV	chr3:49933447	42.2432	28.6363	21.3478	3.1505	1.1948	3.4274
G391C	SNV	chr3:49933447	46.3679	20.5998	23.6067	4.2049	1.7439	3.4769
G391A	SNV	chr3:49933447	49.2989	21.7145	20.626	3.5761	1.319	3.4655
T392C	SNV	chr3:49933446	60.6739	13.0415	18.9783	3.8946	2.126	1.2857
T392A	SNV	chr3:49933446	56.5828	10.3051	21.0679	4.6041	2.34	5.1003
C393T	SNV	chr3:49933445	38.9574	30.3362	22.3678	2.9681	1.2639	4.1065
C393G	SNV	chr3:49933445	50.8436	15.6679	24.4556	5.3843	1.4402	2.2084
C393A	SNV	chr3:49933445	53.4523	21.6635	17.3119	2.6674	1.6605	3.2444
T394G	SNV	chr3:49933444	64.8248	10.6378	18.1245	3.2544	1.8845	1.274
T394C	SNV	chr3:49933444	69.6793	3.9436	18.6224	3.7991	2.4904	1.4652
T394A	SNV	chr3:49933444	55.7574	15.8936	20.3993	4.2449	1.0776	2.6271
G395T	SNV	chr3:49933443	54.4479	9.803	24.8984	4.609	2.0863	4.1553
G395C	SNV	chr3:49933443	59.8678	12.0747	18.807	4.5299	2.2289	2.4917
G395A	SNV	chr3:49933443	58.9779	11.6078	21.227	3.5322	1.7408	2.9142
G395GC	IN	chr3:49933443	63.7364	9.2737	20.6201	3.5063	0.686	2.1774
GC396G	DEL	chr3:49933443	61.7285	7.4435	21.26	4.6807	1.991	2.8961
C396T	SNV	chr3:49933442	60.3449	7.9473	21.0891	4.3968	2.3403	3.8815
C396G	SNV	chr3:49933442	57.5679	15.6233	18.5261	4.6278	0.8401	2.8149
C397T	SNV	chr3:49933441	61.2571	7.1292	20.9196	5.108	2.1426	3.4435
C397G	SNV	chr3:49933441	72.0565	3.8887	13.0066	5.34	2.2858	3.4224
C397A	SNV	chr3:49933441	72.709	4.2122	14.5816	3.9862	1.6108	2.9002
C398T	SNV	chr3:49933440	68.6017	4.395	17.6241	3.5962	2.169	3.6141
C398A	SNV	chr3:49933440	65.4675	5.6542	19.4813	4.1661	1.6434	3.5875
C399T	SNV	chr3:49933439	60.3331	12.9272	18.3747	2.9309	1.172	4.262
C399A	SNV	chr3:49933439	64.8754	7.1827	19.5155	4.4537	2.0657	1.9071
C400T	SNV	chr3:49933438	58.2302	11.1778	21.018	3.9398	2.0735	3.5607
C400G	SNV	chr3:49933438	61.7103	9.0023	21.1017	3.5557	1.9276	2.7023
C400A	SNV	chr3:49933438	61.3262	9.8379	20.8072	4.1487	1.9222	1.9578
T401G	SNV	chr3:49933437	63.5121	9.0431	21.6943	0.7321	3.6665	1.352
T401C	SNV	chr3:49933437	64.6306	6.8028	20.1963	4.649	2.0549	1.6664
T401A	SNV	chr3:49933437	60.3577	7.8689	20.966	4.3505	1.9354	4.5215
G402T	SNV	chr3:49933436	48.4005	15.2135	24.851	5.3603	1.8148	4.3598
G402C	SNV	chr3:49933436	57.4416	10.9894	20.7224	4.8183	2.468	3.5604
G402A	SNV	chr3:49933436	55.4996	11.8616	23.2225	4.9026	1.7079	2.8058
GC403G	DEL	chr3:49933436	56.6252	10.9851	23.5831	3.8629	2.0763	2.8673
C403T	SNV	chr3:49933435	58.2521	8.0261	23.9915	3.8638	1.9893	3.8771
C403G	SNV	chr3:49933435	57.2116	13.1595	17.8827	7.0302	2.7915	1.9245
C403A	SNV	chr3:49933435	62.2781	9.6081	18.9079	5.5938	1.534	2.078
C404T	SNV	chr3:49933434	58.0486	12.6556	20.4719	3.4444	1.8178	3.5616
C404A	SNV	chr3:49933434	68.6413	5.088	18.5722	4.087	2.2664	1.3451
C405T	SNV	chr3:49933433	63.5867	7.0519	20.2763	3.7378	1.8882	3.459
C405A	SNV	chr3:49933433	67.5003	6.0516	19.2169	3.4739	2.1098	1.6474
C406T	SNV	chr3:49933432	61.7941	7.6921	20.4137	4.9099	2.0635	3.1267
C406G	SNV	chr3:49933432	69.4143	3.0851	10.0544	14.7911	1.6556	0.9995
C406A	SNV	chr3:49933432	62.7451	6.3778	20.7826	5.4132	1.6756	3.0057
C407T	SNV	chr3:49933431	49.7769	20.6738	22.1795	2.3503	1.5959	3.4236
C407G	SNV	chr3:49933431	71.2094	4.0714	16.436	3.7906	2.3867	2.1059
C407A	SNV	chr3:49933431	52.0566	20.5401	18.4755	3.4159	2.1855	3.3263
A408T	SNV	chr3:49933430	50.9185	15.8025	23.4576	4.0643	2.0033	3.7538
A408G	SNV	chr3:49933430	64.3644	7.1135	20.2774	3.9459	2.0954	2.2034
A408C	SNV	chr3:49933430	54.2628	14.1854	21.3741	3.7918	2.4632	3.9226
T409G	SNV	chr3:49933429	64.792	10.8719	18.2012	3.0783	0.7607	2.2959
T409C	SNV	chr3:49933429	63.4528	8.8228	19.8232	3.7135	1.7434	2.4443
T409A	SNV	chr3:49933429	65.7364	8.3122	16.9377	4.1452	2.3191	2.5494
TC410T	DEL	chr3:49933429	55.6535	16.6636	21.032	2.7033	1.6904	2.2572
C410T	SNV	chr3:49933428	56.0896	10.9472	22.1547	5.9556	1.6035	3.2493
C410A	SNV	chr3:49933428	60.0509	11.9705	20.2901	4.8955	1.2842	1.5088
C411T	SNV	chr3:49933427	70.5834	4.5863	16.0102	4.7275	1.9119	2.1806
C411A	SNV	chr3:49933427	67.5659	3.0281	20.0517	5.6815	2.2031	1.4697
C412T	SNV	chr3:49933426	43.6005	21.7618	23.7295	5.1898	1.5911	4.1273
C412A	SNV	chr3:49933426	63.7167	15.8062	15.965	0.7305	2.1822	1.5994
CT413C	DEL	chr3:49933426	63.5048	8.9745	18.8255	4.822	1.8703	2.003
T413G	SNV	chr3:49933425	38.6136	38.8666	16.6121	3.3426	0.9041	1.661
T413C	SNV	chr3:49933425	57.8719	15.7298	19.6756	3.0162	1.5276	2.1789
T413A	SNV	chr3:49933425	56.3672	15.4175	21.1036	2.9427	1.8221	2.3469
G414T	SNV	chr3:49933424	53.3975	17.0805	20.2105	4.8578	1.6828	2.7708
G414C	SNV	chr3:49933424	59.5122	10.24	20.9743	4.476	3.159	1.6385
G414A	SNV	chr3:49933424	44.3774	20.0321	23.567	5.4988	1.7919	4.7328
C415T	SNV	chr3:49933423	23.7288	51.0895	21.3819	1.636	0.9104	1.2534
C415G	SNV	chr3:49933423	46.6819	30.0658	16.0367	3.789	1.8894	1.5373
C415A	SNV	chr3:49933423	67.7996	7.4216	16.0312	4.0298	1.9489	2.7688
A416T	SNV	chr3:49933422	59.866	9.8387	21.7446	3.9848	2.5221	2.0437
A416G	SNV	chr3:49933422	53.9449	17.2696	21.1734	3.4887	2.1029	2.0204
A416C	SNV	chr3:49933422	31.9296	41.2435	21.7814	1.446	1.1827	2.4167
G417T	SNV	chr3:49933421	64.2417	10.297	18.3156	4.3127	1.398	1.435
G417C	SNV	chr3:49933421	59.1647	9.3249	22.8265	5.1482	1.9331	1.6026
G417A	SNV	chr3:49933421	59.1235	10.8273	21.1466	4.9492	2.0588	1.8947
C418T	SNV	chr3:49933420	44.8996	26.1135	22.3407	3.1351	1.4821	2.029
C418G	SNV	chr3:49933420	29.0881	44.2087	13.0131	1.2518	0.4389	11.9994
C418A	SNV	chr3:49933420	40.5996	21.2774	27.8714	5.693	1.8311	2.7275
CT419C	DEL	chr3:49933420	50.0329	8.8788	32.9625	6.7961	0.9831	0.3466
T419G	SNV	chr3:49933419	56.7663	12.7712	22.7757	3.9383	1.8328	1.9158
T419C	SNV	chr3:49933419	65.703	7.6643	17.6737	4.516	1.7943	2.6487
T419A	SNV	chr3:49933419	64.4705	8.4796	18.9817	3.9432	2.0088	2.1162
T420G	SNV	chr3:49933418	55.2976	22.4481	17.9203	2.0741	1.3148	0.9451
T420C	SNV	chr3:49933418	64.919	7.0152	19.2906	3.9259	2.4566	2.3928
T420A	SNV	chr3:49933418	26.8788	51.945	16.5588	1.8553	1.2861	1.4758
TG421T	DEL	chr3:49933418	55.5643	14.1424	18.6947	4.7057	0.9499	5.943
G421T	SNV	chr3:49933417	49.2924	17.3467	24.9999	2.7203	1.1225	4.5183
G421A	SNV	chr3:49933417	23.1468	46.1902	20.9291	1.5067	0.9798	7.2474
G422T	SNV	chr3:49933416	60.9374	11.0041	17.3942	4.5974	1.1923	4.8745
G422C	SNV	chr3:49933416	53.1444	11.5255	22.9503	5.9189	1.5632	4.8977
GC423G	DEL	chr3:49933416	44.5453	25.8454	23.0426	1.7905	1.3503	3.4259
C423T	SNV	chr3:49933415	46.7013	22.2802	23.3958	2.3603	1.3344	3.928
C423G	SNV	chr3:49933415	32.5244	36.9021	25.8129	2.1508	0.9293	1.6806
C423A	SNV	chr3:49933415	64.7914	4.3756	18.5892	4.5239	1.81	5.9098
C424T	SNV	chr3:49933414	35.6761	36.4394	21.0153	2.5191	0.9084	3.4418
C424G	SNV	chr3:49933414	52.4731	13.3727	23.1144	4.124	1.7298	5.186
C424A	SNV	chr3:49933414	33.4416	31.9237	23.7292	2.5073	1.1466	7.2515
A425T	SNV	chr3:49933413	58.3002	10.2887	17.8511	4.5235	2.1478	6.8886
A425G	SNV	chr3:49933413	34.4652	34.3189	25.7144	2.2372	0.9463	2.3179
A425C	SNV	chr3:49933413	60.8938	9.786	18.4302	4.5059	2.8143	3.5699
G426A	SNV	chr3:49933412	51.5476	16.1996	20.3966	4.5273	1.9694	5.3595
G427T	SNV	chr3:49933411	32.063	40.5959	20.3309	1.7576	0.728	4.5246
G427C	SNV	chr3:49933411	44.3319	21.5952	23.0071	5.0221	1.4019	4.6419
G427A	SNV	chr3:49933411	38.8468	28.6955	25.2539	1.0099	1.8672	4.3267
GA428G	DEL	chr3:49933411	44.8998	29.7295	20.4208	2.3747	1.3828	1.1924
A428G	SNV	chr3:49933410	23.44	51.843	20.899	2.0686	0.7415	1.008
A428C	SNV	chr3:49933410	31.732	43.0181	19.7403	2.2203	2.3241	0.9652
T429C	SNV	chr3:49933409	64.5791	8.3451	17.8687	3.9073	2.6148	2.6849
T429A	SNV	chr3:49933409	55.4513	16.1752	21.5274	3.0427	1.7886	2.015
TG430T	DEL	chr3:49933409	52.5443	10.5203	24.2032	5.6377	2.0345	5.0601
G430T	SNV	chr3:49933408	50.5139	12.8641	26.3612	3.2785	1.509	5.4732
G430A	SNV	chr3:49933408	36.3669	31.2657	26.6662	2.2147	1.2561	2.2304
G431T	SNV	chr3:49933407	60.6547	11.0681	20.0775	3.2461	1.7877	3.1659
G431C	SNV	chr3:49933407	59.1281	10.4898	21.1372	2.9019	2.586	3.757
G431A	SNV	chr3:49933407	70.3572	5.1409	14.9612	4.2911	2.2942	2.9553
T432G	SNV	chr3:49933406	53.2404	25.7334	16.708	1.3702	2.1679	0.7801
T432C	SNV	chr3:49933406	65.5605	7.8066	18.1575	4.1756	2.3544	1.9454
T432A	SNV	chr3:49933406	70.0792	4.1278	16.6441	4.7555	2.7465	1.647
G433T	SNV	chr3:49933405	50.9681	13.7742	19.1789	2.1498	0.8434	13.0855
G433C	SNV	chr3:49933405	56.1428	11.8287	23.3429	3.1923	2.0067	3.4866
G433A	SNV	chr3:49933405	54.5168	13.8195	23.7401	2.9951	1.6055	3.3231
GC434G	DEL	chr3:49933405	57.1197	14.4453	21.1533	3.4291	1.7157	2.1368
C434T	SNV	chr3:49933404	50.7093	12.7521	22.2158	3.4097	1.7549	9.1582
C434G	SNV	chr3:49933404	36.0445	29.721	29.2484	1.2483	2.8156	0.9223
C434A	SNV	chr3:49933404	71.3334	6.3157	15.2918	3.5425	1.6522	1.8644
C435T	SNV	chr3:49933403	69.0462	5.6183	12.7933	2.976	2.0027	7.5635
C435A	SNV	chr3:49933403	66.649	5.1543	15.9439	6.4702	2.8542	2.9284
C436T	SNV	chr3:49933402	57.1393	11.4233	21.1737	2.1567	2.2148	5.8922
C436A	SNV	chr3:49933402	65.4633	7.329	19.5081	4.1626	2.2518	1.2852
C437T	SNV	chr3:49933401	56.4882	14.5288	20.2953	3.715	1.5452	3.4274
C437G	SNV	chr3:49933401	63.213	6.8417	20.0581	4.8097	2.2638	2.8137
C437A	SNV	chr3:49933401	56.7437	11.1107	24.8262	3.1651	2.7766	1.3777
CA438C	DEL	chr3:49933401	22.2248	36.6725	34.7796	0.8321	1.9859	3.5051
A438T	SNV	chr3:49933400	54.941	16.5899	19.9739	2.5028	1.8032	4.1893
A438G	SNV	chr3:49933400	55.3428	15.6234	21.554	3.6224	1.8381	2.0192
A438C	SNV	chr3:49933400	47.7903	20.9843	21.1853	5.1467	1.8973	2.9962
A438AT	IN	chr3:49933400	47.9992	17.8116	27.2008	1.7487	1.8465	3.3932
AT439A	DEL	chr3:49933400	52.5532	16.4594	23.2226	3.4116	2.8665	1.4867
T439C	SNV	chr3:49933399	55.0503	18.5075	20.1096	3.3816	1.8959	1.0552
T439A	SNV	chr3:49933399	70.5067	7.0552	14.5475	3.9664	2.6365	1.2878
T440G	SNV	chr3:49933398	63.1293	14.1012	17.2388	2.0858	0.6557	2.7892
T440C	SNV	chr3:49933398	67.4472	9.3176	15.5197	3.081	2.6478	1.9866
T440A	SNV	chr3:49933398	54.147	15.0764	24.2164	2.894	2.4705	1.1957
G441T	SNV	chr3:49933397	57.097	10.4688	22.8747	3.8168	3.4259	2.3167
G441C	SNV	chr3:49933397	56.3187	14.0093	23.7676	2.5095	2.2782	1.1168
G441A	SNV	chr3:49933397	61.1439	9.1944	21.7208	3.2909	2.2469	2.403
C442T	SNV	chr3:49933396	16.9959	57.8261	21.178	1.4493	0.8629	1.6879
C442G	SNV	chr3:49933396	26.5111	55.061	16.7558	0.625	0.2792	0.7679
C442A	SNV	chr3:49933396	69.2964	7.6437	15.5949	3.471	1.9463	2.0477
A443T	SNV	chr3:49933395	6.0589	80.3556	11.987	0.2842	0.2334	1.0808
A443G	SNV	chr3:49933395	3.7524	84.4508	10.5077	0.1925	0.1975	0.899
A443C	SNV	chr3:49933395	4.0552	86.8699	7.9365	0.1746	0.5323	0.4315
AG444A	DEL	chr3:49933395	0.6278	89.6089	8.8573	0.0836	0.0931	0.7293
G444T	SNV	chr3:49933394	1.0171	85.0824	12.2665	0.0584	0.1864	1.3892
G444C	SNV	chr3:49933394	0.4532	94.8531	4.1768	0.028	0.0538	0.4351
G444A	SNV	chr3:49933394	2.2917	86.4443	9.9446	0.1886	0.2004	0.9303
G445C	SNV	chr3:49933393	1.9754	79.4548	15.7108	0.0186	0.3257	2.5147
G445A	SNV	chr3:49933393	0.6092	87.3901	10.9872	0.0398	0.0813	0.8925
T446C	SNV	chr3:49933392	0.5116	86.5215	11.6215	0.0276	0.0808	1.237
T446A	SNV	chr3:49933392	1.4711	77.6259	18.0513	0.0952	0.253	2.5035
TA447T	DEL	chr3:49933392	0.259	76.7616	15.9388	0.0082	0.3802	6.6522
A447T	SNV	chr3:49933391	2.0431	83.9386	9.8717	0.1624	0.3183	3.666
A447G	SNV	chr3:49933391	3.5532	82.8495	11.6225	0.2621	0.1551	1.5577
G448T	SNV	chr3:49933390	53.1613	12.2417	20.1178	1.4806	2.8922	10.1066
G448A	SNV	chr3:49933390	77.425	1.4117	12.2756	4.072	2.4093	2.4064
G449T	SNV	chr3:49933389	10.5017	68.7832	17.7218	0.9564	0.2365	1.8004
G449A	SNV	chr3:49933389	8.4219	69.5608	16.5946	0.4317	0.5479	4.443
C450T	SNV	chr3:49933388	70.4503	6.1276	14.3723	4.9319	2.3449	1.773
C450A	SNV	chr3:49933388	64.5885	8.3776	18.3312	3.5391	1.8022	3.3615
A451T	SNV	chr3:49933387	62.2204	8.1739	20.0526	4.2179	2.2625	3.0727
A451G	SNV	chr3:49933387	52.248	19.1575	19.9925	3.8515	1.6672	3.0833
A451C	SNV	chr3:49933387	65.7446	9.2787	15.1156	3.6741	2.6424	3.5445
G452T	SNV	chr3:49933386	57.918	9.7612	21.5826	4.6424	2.6794	3.4165
G452A	SNV	chr3:49933386	65.4281	8.3958	18.7698	3.1759	1.8976	2.3329
GC453G	DEL	chr3:49933386	39.8017	20.1242	30.8352	1.881	3.0099	4.348
C453T	SNV	chr3:49933385	57.0812	15.2221	20.6721	3.109	1.7662	2.1494
C453G	SNV	chr3:49933385	53.0024	15.4878	24.5062	3.835	2.2891	0.8795
C453A	SNV	chr3:49933385	52.8313	15.5394	21.977	2.2329	2.4548	4.9645
C454T	SNV	chr3:49933384	50.2047	19.3914	22.3909	4.7154	1.4377	1.8598
C454G	SNV	chr3:49933384	48.981	22.979	19.3183	2.9561	1.5199	4.2457
C454A	SNV	chr3:49933384	56.5163	14.5046	22.1091	2.8672	1.4199	2.5829
C455T	SNV	chr3:49933383	51.9389	17.9755	23.0728	3.2985	1.6758	2.0385
C455CA	IN	chr3:49933383	60.9026	8.9508	21.1476	5.6807	1.7436	1.5747
CA456C	DEL	chr3:49933383	39.5095	9.0081	43.7552	0.6709	2.3593	4.697
A456T	SNV	chr3:49933382	62.8667	12.0015	17.9379	3.5812	1.7168	1.8959
A456G	SNV	chr3:49933382	58.6709	10.1508	21.4048	3.4105	2.1842	4.1789
A456C	SNV	chr3:49933382	63.5325	6.5852	17.8524	4.5751	2.8514	4.6035
G457T	SNV	chr3:49933381	63.2543	9.116	18.751	4.3026	1.9781	2.5979
G457C	SNV	chr3:49933381	49.694	21.4479	20.2787	4.3059	2.1236	2.15
G457A	SNV	chr3:49933381	63.7545	9.4167	18.8305	3.5606	2.0436	2.3941
C458T	SNV	chr3:49933380	65.6413	9.1775	17.7599	3.9389	1.9769	1.5055
C458G	SNV	chr3:49933380	58.5124	11.4426	19.4516	4.5104	3.5194	2.5634
C458A	SNV	chr3:49933380	61.1793	8.1959	20.3248	4.5324	3.398	2.3697
T459G	SNV	chr3:49933379	65.2545	7.2617	17.6174	6.1345	1.769	1.9629
T459C	SNV	chr3:49933379	57.6983	12.246	22.2554	3.9605	1.3777	2.4621
T459A	SNV	chr3:49933379	52.6707	22.3857	18.2505	3.1243	1.9203	1.6485
TG460T	DEL	chr3:49933379	28.0561	49.8122	18.406	1.3183	1.2054	1.202
G460T	SNV	chr3:49933378	44.6353	26.7575	21.8355	2.5819	2.6159	1.574
G460C	SNV	chr3:49933378	9.9213	49.6463	34.5141	1.1798	2.7398	1.9988
G460A	SNV	chr3:49933378	18.9089	56.4867	21.2153	1.5103	0.7905	1.0884
G461T	SNV	chr3:49933377	44.7276	28.5822	20.5086	3.314	1.5742	1.2934
G461C	SNV	chr3:49933377	7.185	74.6432	12.041	5.7037	0.1486	0.2785
G461A	SNV	chr3:49933377	41.7465	30.8672	20.018	3.4488	1.8894	2.0301
A462T	SNV	chr3:49933376	60.4333	14.7147	17.2814	4.3179	1.2516	2.0011
A462G	SNV	chr3:49933376	51.5729	18.2902	22.9861	3.8336	1.8022	1.5149
A462C	SNV	chr3:49933376	50.9835	35.9293	9.2031	1.9872	0.8832	1.0136
AC463A	DEL	chr3:49933376	51.2911	22.9693	18.3579	2.0026	1.3993	3.9798
C463T	SNV	chr3:49933375	60.3429	8.984	21.0945	4.9759	2.1759	2.4268
C463G	SNV	chr3:49933375	59.7772	12.3716	10.7938	10.1113	1.9408	5.0052
C464T	SNV	chr3:49933374	61.3733	9.42	20.3808	4.7068	1.5044	2.6147
C464G	SNV	chr3:49933374	50.9257	14.253	24.6687	3.1975	1.3448	5.6103
C464A	SNV	chr3:49933374	61.3169	10.4224	19.9243	3.6934	1.8271	2.8159
CT465C	DEL	chr3:49933374	47.2166	23.5512	22.8124	2.6566	2.4813	1.282
T465G	SNV	chr3:49933373	61.1371	10.1381	19.8043	2.8882	2.0515	3.9808
T465C	SNV	chr3:49933373	54.1876	18.0656	20.3148	3.4651	2.021	1.9459
T465A	SNV	chr3:49933373	52.004	14.3283	23.4878	4.387	2.4931	3.2998
TC466T	DEL	chr3:49933373	46.3296	20.4173	27.0997	2.2052	1.4748	2.4734
C466T	SNV	chr3:49933372	43.5964	27.6704	20.3939	3.6522	1.3173	3.3699
C466G	SNV	chr3:49933372	14.2836	63.3158	19.3373	1.1664	0.7847	1.1123
C466A	SNV	chr3:49933372	22.0351	49.2424	25.1505	1.2166	0.7349	1.6205
C467T	SNV	chr3:49933371	29.1613	47.0303	20.087	1.2995	1.1065	1.3155
C467G	SNV	chr3:49933371	13.2134	50.9354	29.2415	1.6398	3.4884	1.4816
C467A	SNV	chr3:49933371	21.8118	44.3891	29.6095	1.257	0.8021	2.1305
C468T	SNV	chr3:49933370	58.1457	14.2687	18.8976	3.6523	1.7372	3.2985
C468G	SNV	chr3:49933370	34.4522	22.4684	31.4157	3.4186	0.8809	7.3642
C468A	SNV	chr3:49933370	43.2632	23.544	23.7739	2.9567	1.2808	5.1813
CT469C	DEL	chr3:49933370	54.4934	9.1991	26.5221	3.5046	2.2971	3.9836
T469G	SNV	chr3:49933369	57.4486	9.829	24.3041	2.9858	2.2238	3.2088
T469C	SNV	chr3:49933369	55.9903	14.0113	21.9089	4.8201	1.6671	1.6023
T469A	SNV	chr3:49933369	53.6396	17.2206	21.7847	2.8088	2.1194	2.4268
T469TG	IN	chr3:49933369	58.5746	18.8402	15.8924	3.1328	1.5206	2.0395
TG470T	DEL	chr3:49933369	45.8126	13.8162	30.3009	2.6072	2.3584	5.1047
G470T	SNV	chr3:49933368	49.4317	9.4106	29.1167	3.1647	3.2176	5.6586
G470C	SNV	chr3:49933368	45.3694	14.3873	26.8448	2.0502	3.7849	7.5634
G470A	SNV	chr3:49933368	39.8815	19.944	32.5526	2.7037	2.874	2.0441
G471T	SNV	chr3:49933367	39.0787	27.0079	28.6526	2.2189	1.7191	1.3228
G471C	SNV	chr3:49933367	37.7492	25.4616	29.1951	2.8397	1.5877	3.1668
G471A	SNV	chr3:49933367	41.4632	21.7218	29.3984	2.583	2.0025	2.831
G472A	SNV	chr3:49933366	41.3632	15.6963	31.6216	3.1759	3.1731	4.9699
GA473G	DEL	chr3:49933366	50.3833	15.4012	23.4027	6.6163	1.7867	2.4097
A473T	SNV	chr3:49933365	56.0001	11.0288	25.6835	3.6662	1.9532	1.6683
A473G	SNV	chr3:49933365	58.4771	15.0762	19.3125	3.9912	1.7151	1.4279
A473C	SNV	chr3:49933365	39.8733	28.0428	26.8249	2.2075	1.5841	1.4674
A474T	SNV	chr3:49933364	59.7126	12.3757	19.3377	4.0872	1.815	2.6719
A474G	SNV	chr3:49933364	56.3465	11.8133	22.0788	4.4326	1.6833	3.6454
A474C	SNV	chr3:49933364	53.3366	16.8571	20.7939	5.6942	1.4806	1.8376
A475T	SNV	chr3:49933363	53.1504	11.7211	24.0687	4.7727	3.1102	3.1769
A475G	SNV	chr3:49933363	58.4995	10.7796	21.9657	3.9436	1.7245	3.0872
C476T	SNV	chr3:49933362	62.4929	8.8709	20.4007	4.0656	2.2353	1.9346
C476G	SNV	chr3:49933362	61.5108	10.3926	18.0921	4.6637	1.5999	3.741
C476A	SNV	chr3:49933362	64.1378	13.4503	12.8001	4.422	3.3685	1.8214
C476CA	IN	chr3:49933362	62.459	14.8138	15.7145	2.3819	1.4953	3.1355
A477T	SNV	chr3:49933361	57.6374	11.3674	22.7934	3.9949	2.0029	2.2041
A477G	SNV	chr3:49933361	60.7855	10.8703	19.0212	4.9091	1.9999	2.4141
AC478A	DEL	chr3:49933361	61.2304	15.1395	16.8212	2.8382	2.2158	1.7549
C478T	SNV	chr3:49933360	59.9845	10.9602	21.1705	4.0548	1.9384	1.8916
C478G	SNV	chr3:49933360	60.6029	18.9798	14.2283	3.589	0.9839	1.6161
C478A	SNV	chr3:49933360	65.2245	10.7931	16.4869	3.9978	1.8511	1.6466
CG479C	DEL	chr3:49933360	28.4895	33.2325	23.6972	2.9851	1.721	9.8747
G479T	SNV	chr3:49933359	37.3629	25.0968	26.3912	3.2902	2.0987	5.7603
G479A	SNV	chr3:49933359	42.3976	20.4093	29.0541	2.8659	2.2708	3.0023
G480T	SNV	chr3:49933358	32.9818	28.2619	28.4093	1.6566	2.2994	6.3911
G480A	SNV	chr3:49933358	36.7841	21.0133	29.0801	2.361	2.3944	8.367
G481T	SNV	chr3:49933357	41.5175	21.1948	26.5453	2.6489	2.0261	6.0674
G481C	SNV	chr3:49933357	48.0579	7.439	38.8654	0.279	3.5809	1.7778
C482T	SNV	chr3:49933356	65.6615	10.9809	17.5475	2.9922	1.8232	0.9947
C482G	SNV	chr3:49933356	45.0978	11.6139	30.8703	6.2475	4.578	1.5925
C482A	SNV	chr3:49933356	71.1899	10.0119	10.5986	3.1508	1.8334	3.2155
A483T	SNV	chr3:49933355	64.3667	6.7309	21.1426	4.0994	1.6059	2.0545
A483G	SNV	chr3:49933355	66.7119	8.1092	15.2257	5.7416	2.2626	1.949
A483C	SNV	chr3:49933355	72.1645	0.8449	14.0404	3.5743	8.7446	0.6312
G484T	SNV	chr3:49933354	58.9769	10.1084	23.8682	3.1111	2.3292	1.6062
G484C	SNV	chr3:49933354	55.4452	6.3155	30.3354	0.3056	5.4853	2.1129
G484A	SNV	chr3:49933354	58.552	10.3277	19.712	4.9099	2.2916	4.2069
A485T	SNV	chr3:49933353	60.5217	13.2639	17.7308	3.8586	1.7386	2.8864
A485G	SNV	chr3:49933353	64.2975	13.3833	14.1264	4.7306	1.7589	1.7033
A485C	SNV	chr3:49933353	55.8637	9.362	25.6067	4.0751	2.3894	2.7031
G486T	SNV	chr3:49933352	59.2776	16.297	15.9949	4.2563	1.5429	2.6314
G486A	SNV	chr3:49933352	53.328	10.1505	27.6007	3.6616	1.3158	3.9434
G487T	SNV	chr3:49933351	56.3217	7.2996	25.2418	4.6428	2.4992	3.9949
G487A	SNV	chr3:49933351	47.5865	8.6478	35.5453	3.1857	2.0207	3.0141
G488T	SNV	chr3:49933350	58.1859	9.5081	21.4326	6.5795	2.3489	1.9449
G488C	SNV	chr3:49933350	50.0571	10.1636	30.7236	3.9655	2.7439	2.3463
G488A	SNV	chr3:49933350	54.1837	11.4526	22.8505	3.5149	2.1446	5.8537
C489T	SNV	chr3:49933349	62.4729	14.5771	15.9442	3.9641	1.7259	1.3158
C490T	SNV	chr3:49933348	61.7232	14.9186	14.5247	4.0339	2.0135	2.7863
C490A	SNV	chr3:49933348	61.8394	11.279	17.7935	4.5666	2.1352	2.3862
CT491C	DEL	chr3:49933348	24.5086	35.3435	9.9893	24.0112	0.8953	5.252
T491G	SNV	chr3:49933347	61.6123	6.2755	21.2208	3.1619	2.1166	5.6128
T491C	SNV	chr3:49933347	55.5008	12.0818	21.9443	3.3745	2.6409	4.4577
T491A	SNV	chr3:49933347	60.726	11.8343	20.3201	2.8489	2.1708	2.0998
A492T	SNV	chr3:49933346	58.4084	14.0701	19.4962	3.8678	1.7576	2.4
A492G	SNV	chr3:49933346	57.3605	10.1431	21.2017	4.1157	2.6788	4.5002
A492C	SNV	chr3:49933346	65.0505	10.6469	16.6175	3.5851	1.9014	2.1985
C493T	SNV	chr3:49933345	59.6151	11.7358	20.558	3.9295	2.2408	1.9208
C493G	SNV	chr3:49933345	61.6605	11.7322	17.6872	3.697	2.7728	2.4503
C493A	SNV	chr3:49933345	62.7241	13.3093	16.7474	3.5903	1.676	1.9529
A494T	SNV	chr3:49933344	59.5696	10.6291	22.8784	2.8176	2.2335	1.8718
A494G	SNV	chr3:49933344	61.9292	10.7137	18.2608	4.7975	1.6911	2.6077
A494C	SNV	chr3:49933344	57.8986	14.1438	18.7876	3.7738	2.0741	3.322
G495T	SNV	chr3:49933343	55.7193	12.1567	22.6768	4.211	2.6306	2.6056
G495A	SNV	chr3:49933343	63.4618	11.6345	16.2259	2.9243	2.0104	3.7431
G496T	SNV	chr3:49933342	53.0344	11.7286	25.5018	3.2528	2.5133	3.9691
G496C	SNV	chr3:49933342	59.9966	10.9186	17.1546	3.1376	1.507	7.2857
G496A	SNV	chr3:49933342	58.4266	12.5581	18.4854	5.0756	1.781	3.6733
C497T	SNV	chr3:49933341	52.1212	7.5565	26.8764	2.6475	6.1996	4.5989
C497G	SNV	chr3:49933341	48.5546	8.2579	27.815	2.8627	8.1248	4.385
C497A	SNV	chr3:49933341	60.6261	8.4067	18.995	4.4152	2.815	4.7419
T498G	SNV	chr3:49933340	58.7699	7.8286	23.1432	4.1357	2.703	3.4196
T498C	SNV	chr3:49933340	48.2216	11.79	31.4826	3.1316	2.8238	2.5503
T498A	SNV	chr3:49933340	62.2168	10.0768	18.7529	4.0594	2.1841	2.7101
G499T	SNV	chr3:49933339	54.2137	9.9576	26.9069	4.5539	2.4999	1.868
G499A	SNV	chr3:49933339	52.5181	16.2504	22.8829	3.8482	1.6136	2.8867
G500T	SNV	chr3:49933338	60.9746	14.944	17.1058	3.746	1.0626	2.167
G500C	SNV	chr3:49933338	60.2862	8.3725	20.7711	4.2305	2.6871	3.6527
G500A	SNV	chr3:49933338	53.2532	22.8884	16.8506	4.0337	1.336	1.6381
G501T	SNV	chr3:49933337	62.5021	14.6251	15.0571	5.3951	1.2777	1.1429
G501C	SNV	chr3:49933337	43.4649	15.4324	28.1692	4.4444	2.6019	5.8872
G501A	SNV	chr3:49933337	60.2358	14.5966	16.4476	4.0486	1.7727	2.8987
C502T	SNV	chr3:49933336	66.635	13.3321	12.1931	5.3843	1.1036	1.352
C502A	SNV	chr3:49933336	68.0076	12.4751	11.5724	5.1888	0.945	1.811
C503T	SNV	chr3:49933335	51.294	7.7444	30.3713	1.3912	3.7137	5.4854
C503G	SNV	chr3:49933335	19.3352	3.9368	55.7029	0.6004	11.4679	8.9568
C503A	SNV	chr3:49933335	29.5112	6.2818	46.3959	2.5127	9.1729	6.1255
CT504C	DEL	chr3:49933335	0.1392	1.8017	77.121	0.0257	15.2137	5.6987
G505T	SNV	chr3:49933333	55.3485	7.7537	27.3882	3.4713	3.518	2.5203
G505A	SNV	chr3:49933333	60.3684	12.8507	18.5379	5.3218	1.1549	1.7662
A506T	SNV	chr3:49933332	3.2246	38.6407	43.7361	0.1166	6.9948	7.2872
G507T	SNV	chr3:49933331	66.4616	16.1465	11.3613	4.3439	0.4652	1.2215
G507C	SNV	chr3:49933331	61.6846	21.4747	11.3281	3.3605	0.6208	1.5313
G507A	SNV	chr3:49933331	57.0963	19.2678	16.4682	4.4448	0.5321	2.1908
GT508G	DEL	chr3:49933331	45.8612	7.5056	31.0311	1.9239	6.2305	7.4477
T508C	SNV	chr3:49933330	58.2398	10.5725	22.6411	3.0579	3.0819	2.4068
T508A	SNV	chr3:49933330	54.272	12.4527	24.509	2.5703	2.5286	3.6673
T509C	SNV	chr3:49933329	53.6617	13.1519	23.0298	3.8067	2.576	3.7738
T509A	SNV	chr3:49933329	56.1439	10.274	24.2384	3.0189	3.0243	3.3004
G510T	SNV	chr3:49933328	72.2672	11.3871	8.8387	5.782	0.6172	1.1078
G510C	SNV	chr3:49933328	56.2436	9.3682	25.3499	3.4085	4.0532	1.5767
G510A	SNV	chr3:49933328	62.0639	12.2639	18.4106	3.6295	1.5839	2.0482
GC511G	DEL	chr3:49933328	61.3388	6.731	23.8282	3.1776	2.3766	2.5477
C511T	SNV	chr3:49933327	66.5433	13.1094	12.8072	4.5698	0.9123	2.058
C511G	SNV	chr3:49933327	52.991	10.4432	25.6191	3.0468	4.1415	3.7583
C511A	SNV	chr3:49933327	63.6202	11.599	16.1018	4.1873	1.8415	2.6502
C512T	SNV	chr3:49933326	65.5952	11.457	16.068	3.3024	1.3204	2.257
C512G	SNV	chr3:49933326	43.223	12.9945	27.5276	2.6347	4.9611	8.6591
C512A	SNV	chr3:49933326	59.7485	11.5896	18.7043	4.284	1.399	4.2746
CA513C	DEL	chr3:49933326	45.5994	4.7805	38.4675	1.6322	3.5158	6.0046
A513T	SNV	chr3:49933325	61.5138	14.9043	16.0871	4.5234	1.2565	1.7149
A513G	SNV	chr3:49933325	56.798	10.7574	22.5465	3.1996	2.7237	3.9748
C514T	SNV	chr3:49933324	64.9342	15.3529	13.0971	4.5161	0.9312	1.1685
C514A	SNV	chr3:49933324	48.0252	15.3534	28.5698	2.3966	0.7174	4.9376
C515T	SNV	chr3:49933323	62.1471	19.7899	11.8567	4.17	0.8361	1.2002
C515G	SNV	chr3:49933323	9.9424	55.4063	32.5872	0.268	1.1913	0.6049
C515A	SNV	chr3:49933323	54.3274	14.3486	22.2967	3.896	1.8727	3.2586
T516G	SNV	chr3:49933322	10.1894	2.5523	74.6779	2.1953	4.8194	5.5658
T516C	SNV	chr3:49933322	56.9282	10.8954	23.1428	3.8784	2.3561	2.7992
G517T	SNV	chr3:49933321	58.3871	21.2395	9.3403	8.8928	0.8454	1.295
G517C	SNV	chr3:49933321	59.3766	20.0327	13.5103	4.8538	1.1877	1.0388
G517A	SNV	chr3:49933321	60.8424	13.4958	17.6648	4.4419	1.5739	1.9812
G517GC	IN	chr3:49933321	61.8236	16.2604	14.1122	4.1512	1.2839	2.3687
G517GA	IN	chr3:49933321	61.7771	9.6958	16.5099	4.1525	1.9011	5.9636
GC518G	DEL	chr3:49933321	38.6284	3.5188	42.2002	1.4611	5.9284	8.2631
C518T	SNV	chr3:49933320	60.6121	14.9882	16.4454	4.8401	0.873	2.2412
C518A	SNV	chr3:49933320	35.4678	3.1125	39.4822	0.941	11.5933	9.4031
C519T	SNV	chr3:49933319	50.8402	8.1723	29.485	4.8724	2.6601	3.9699
C519A	SNV	chr3:49933319	38.6718	4.6659	41.275	2.295	5.6335	7.4588
C520T	SNV	chr3:49933318	58.9505	12.1768	20.1978	4.8661	1.6087	2.2
C520A	SNV	chr3:49933318	49.5542	9.6911	31.2846	3.2204	3.19	3.0597
C521T	SNV	chr3:49933317	60.5897	10.2906	20.5927	3.8142	1.7947	2.9182
C521G	SNV	chr3:49933317	60.6067	13.4831	16.1518	5.2641	2.701	1.7933
C521A	SNV	chr3:49933317	62.7639	17.3597	11.7356	6.633	0.6386	0.8693
C521CA	IN	chr3:49933317	62.7056	12.3361	5.9009	5.0772	0.2477	13.7325
C522T	SNV	chr3:49933316	63.1868	12.8878	16.1868	4.9661	1.2992	1.4733
G525C	SNV	chr3:49933313	49.3354	2.8719	31.9601	4.0752	2.9775	8.7799
G525A	SNV	chr3:49933313	58.5347	4.1049	25.4565	1.7254	3.9499	6.2287
T526C	SNV	chr3:49933312	42.2134	6.98	36.9691	1.3182	4.7134	7.8059
T526A	SNV	chr3:49933312	50.1827	4.5821	30.6499	2.4579	4.7616	7.3657
C527T	SNV	chr3:49933311	52.2386	8.3881	28.8891	4.5128	3.8822	2.0893
C527G	SNV	chr3:49933311	38.3982	5.9295	41.3944	1.9652	9.1514	3.1613
C527A	SNV	chr3:49933311	55.7657	6.1003	27.141	3.1233	4.8871	2.9825
T528G	SNV	chr3:49933310	49.5473	14.9214	26.0995	3.22	2.191	4.0209
T528C	SNV	chr3:49933310	58.7228	11.4444	21.6118	3.9323	2.1712	2.1175
T528A	SNV	chr3:49933310	44.4711	8.4494	37.2677	3.6413	3.4939	2.6766
G529T	SNV	chr3:49933309	61.0562	11.8243	19.6674	3.5895	1.7361	2.1265
G529C	SNV	chr3:49933309	71.0729	9.7559	10.9473	2.6618	1.2302	4.3319
G529A	SNV	chr3:49933309	52.5571	13.9151	25.2719	4.0732	2.0995	2.0832
C530T	SNV	chr3:49933308	53.5142	8.2464	28.9272	3.3007	3.6118	2.3997
C530G	SNV	chr3:49933308	38.0776	1.8096	39.865	0.611	12.9807	6.6562
C530A	SNV	chr3:49933308	31.2638	7.4521	48.2202	0.4496	5.3312	7.2832
G531T	SNV	chr3:49933307	41.3171	12.4764	36.5673	0.4214	5.4109	3.8069
G531C	SNV	chr3:49933307	61.0163	12.6338	10.4477	15.2774	0.0903	0.5345
G531A	SNV	chr3:49933307	59.6135	13.0684	20.2927	2.5586	2.0428	2.424
T532G	SNV	chr3:49933306	57.5752	15.7114	15.9619	4.7395	0.8417	5.1703
T532C	SNV	chr3:49933306	57.7933	18.5106	14.6973	3.8942	1.0319	4.0726
T532A	SNV	chr3:49933306	53.9315	16.8181	18.2819	5.5488	1.4536	3.9662
A533T	SNV	chr3:49933305	58.0689	16.7446	16.1121	3.8036	1.7137	3.5572
A533G	SNV	chr3:49933305	55.46	17.385	17.2851	5.1458	1.2135	3.5105
G534T	SNV	chr3:49933304	60.6325	10.0124	22.8581	1.588	2.1707	2.7383
G534C	SNV	chr3:49933304	55.5845	12.5969	20.9369	4.5264	3.7913	2.5641
G534A	SNV	chr3:49933304	61.1812	9.279	21.3693	3.0848	3.0746	2.0111
A535T	SNV	chr3:49933303	49.4404	9.293	33.4746	2.6783	3.1502	1.9635
A535G	SNV	chr3:49933303	62.6302	9.4034	20.541	4.1464	1.592	1.6869
T536C	SNV	chr3:49933302	59.6462	13.6158	19.6702	2.7591	1.4009	2.9078
T536A	SNV	chr3:49933302	59.9388	7.7996	22.6999	2.7971	3.2854	3.4793
TG537T	DEL	chr3:49933302	67.3746	12.5349	13.4745	2.1678	2.0058	2.4424
G537T	SNV	chr3:49933301	50.7193	8.2092	31.5319	2.2469	3.6851	3.6077
G537C	SNV	chr3:49933301	59.7079	12.5145	18.8828	5.252	1.3474	2.2955
G537A	SNV	chr3:49933301	39.9237	3.3881	45.9974	2.6226	5.7383	2.3299
G538T	SNV	chr3:49933300	58.9889	8.4914	23.3501	3.0854	3.0801	3.0041
G538C	SNV	chr3:49933300	58.5437	13.4716	20.0721	4.0264	1.5525	2.3337
G538A	SNV	chr3:49933300	56.3071	10.3691	25.0066	3.5348	2.2276	2.5547
T539G	SNV	chr3:49933299	59.0441	5.5493	24.1881	1.2196	7.9295	2.0693
T539C	SNV	chr3:49933299	59.6467	13.2499	18.4539	4.7101	1.4251	2.5143
T539A	SNV	chr3:49933299	58.9786	13.4075	22.4589	1.6739	1.4905	1.9906
G540T	SNV	chr3:49933298	50.5334	4.7193	35.205	2.1571	6.2286	1.1566
G540A	SNV	chr3:49933298	42.0153	4.705	40.0043	2.4887	6.5311	4.2555
A541T	SNV	chr3:49933297	56.1796	9.3148	26.0256	3.4522	2.6694	2.3585
A541G	SNV	chr3:49933297	59.0673	12.8064	19.6658	4.3723	1.7174	2.3709
A541C	SNV	chr3:49933297	62.5301	9.6098	20.213	3.4074	2.3327	1.907
A542T	SNV	chr3:49933296	52.9576	10.5122	22.7643	3.6573	2.1648	7.9438
A542G	SNV	chr3:49933296	52.9473	9.2043	27.5427	3.0094	3.3279	3.9684
T543G	SNV	chr3:49933295	41.7663	27.6824	18.8646	8.9863	1.2408	1.4596
T543C	SNV	chr3:49933295	60.9232	14.6996	14.6863	5.55	1.104	3.037
T543A	SNV	chr3:49933295	57.9165	11.5436	23.5387	3.1195	1.6646	2.2171
G544T	SNV	chr3:49933294	59.6947	6.0997	25.9503	3.2577	3.102	1.8955
G544C	SNV	chr3:49933294	56.7773	11.8528	22.8994	3.9072	1.4994	3.064
G544A	SNV	chr3:49933294	57.2658	9.7058	24.0441	4.8369	2.163	1.9844
T545G	SNV	chr3:49933293	63.7772	9.5955	17.4073	5.178	0.7898	3.2522
T545C	SNV	chr3:49933293	61.6569	10.5363	20.401	3.6285	1.9998	1.7776
T545A	SNV	chr3:49933293	57.2274	13.3518	20.0719	5.2767	1.6469	2.4253
C546T	SNV	chr3:49933292	56.14	7.1429	26.8845	3.2426	3.4925	3.0974
C546A	SNV	chr3:49933292	50.6176	7.1567	32.7994	3.6731	3.9511	1.8022
A547T	SNV	chr3:49933291	59.4958	9.0816	21.7889	3.7146	2.6869	3.2323
A547G	SNV	chr3:49933291	59.8581	14.0198	15.8318	6.0144	1.2216	3.0543
A547C	SNV	chr3:49933291	62.2189	17.0114	14.016	3.1194	1.4791	2.1551
T548C	SNV	chr3:49933290	57.0419	16.3337	17.5007	4.6027	1.5215	2.9996
T548A	SNV	chr3:49933290	58.9489	13.4383	20.6238	3.8336	1.3082	1.8473
A549G	SNV	chr3:49933289	59.328	12.9445	19.5314	3.791	2.1504	2.2547
A549C	SNV	chr3:49933289	59.3177	6.9871	21.4309	5.5537	4.7031	2.0075
AT550A	DEL	chr3:49933289	57.9752	14.1609	20.8853	1.8297	2.8145	2.3344
T550C	SNV	chr3:49933288	60.6537	11.3132	20.999	3.4031	2.0383	1.5928
T550A	SNV	chr3:49933288	56.963	7.9216	26.5499	3.6386	2.8887	2.0382
TC551T	DEL	chr3:49933288	57.7225	8.0483	21.4001	3.3916	4.5209	4.9167
C551T	SNV	chr3:49933287	57.9995	7.6272	25.0698	1.9919	2.8147	4.4969
C551G	SNV	chr3:49933287	40.9504	11.3355	37.1695	6.6823	2.5455	1.3167
C551A	SNV	chr3:49933287	66.5676	5.4992	20.0043	1.3071	4.4581	2.1635
C552T	SNV	chr3:49933286	50.7789	6.1653	30.1858	2.724	3.3703	6.7757
C552G	SNV	chr3:49933286	64.2906	10.5194	16.8507	3.7961	2.2582	2.285
C552A	SNV	chr3:49933286	54.3847	8.5463	29.3403	3.7353	1.9659	2.0274
T553G	SNV	chr3:49933285	61.2838	9.0071	19.6284	4.8206	3.2232	2.037
T553C	SNV	chr3:49933285	63.1673	10.2924	18.0089	4.4279	1.7668	2.3367
T553A	SNV	chr3:49933285	57.881	9.4879	24.3412	3.7979	2.3961	2.0959
TG554T	DEL	chr3:49933285	62.8438	16.843	11.5349	3.3964	1.2874	4.0946
G554C	SNV	chr3:49933284	57.4824	13.1996	16.4193	4.6941	0.8826	7.322
G555T	SNV	chr3:49933283	53.944	13.9232	16.2953	3.7864	2.2589	9.7923
G555C	SNV	chr3:49933283	59.9942	14.4132	13.7813	5.7532	1.1005	4.9577
G555A	SNV	chr3:49933283	60.5227	14.5175	16.2594	4.9139	1.0555	2.7311
G556C	SNV	chr3:49933282	65.2989	12.607	14.2459	4.3614	1.0783	2.4084
G556A	SNV	chr3:49933282	57.9442	18.977	14.4835	4.7237	1.1056	2.7659
GT557G	DEL	chr3:49933282	37.2579	34.2198	17.208	0.4691	1.316	9.5292
T557C	SNV	chr3:49933281	59.9254	15.0212	16.334	4.3424	1.1548	3.2223
T557A	SNV	chr3:49933281	58.1492	19.1524	14.0548	4.2686	1.1649	3.2101
A558T	SNV	chr3:49933280	60.434	14.1684	19.0916	2.7453	1.6063	1.9544
A558G	SNV	chr3:49933280	56.3558	13.8436	21.2058	3.7865	2.2574	2.551
G559T	SNV	chr3:49933279	59.712	8.8916	21.9022	2.2526	2.639	4.6026
G559A	SNV	chr3:49933279	60.2077	11.8146	19.9343	4.004	1.9634	2.0761
A560T	SNV	chr3:49933278	60.0107	9.3616	21.6612	3.9888	2.2931	2.6846
A560C	SNV	chr3:49933278	63.2019	5.8638	21.2864	6.1311	2.0684	1.4485
G561T	SNV	chr3:49933277	46.8314	6.1401	24.0713	8.3639	3.1845	11.4087
G561C	SNV	chr3:49933277	57.7422	13.1863	20.8144	3.587	2.4073	2.2629
G561A	SNV	chr3:49933277	60.4189	8.264	22.1005	4.1246	2.166	2.926
T562C	SNV	chr3:49933276	59.0814	14.8685	17.4906	4.2274	1.5495	2.7826
T562A	SNV	chr3:49933276	63.8614	10.1893	18.2979	3.9156	1.7912	1.9445
TG563T	DEL	chr3:49933276	72.3867	9.2709	11.9452	2.1847	2.6257	1.5869
G563T	SNV	chr3:49933275	57.0997	10.482	22.6533	5.3912	1.7648	2.609
G563C	SNV	chr3:49933275	65.4497	17.6921	12.3116	2.0245	1.2962	1.2259
G563A	SNV	chr3:49933275	56.4364	6.0875	30.8148	2.7168	2.0902	1.8543
G564C	SNV	chr3:49933274	57.9787	17.459	15.6446	2.7283	1.3409	4.8485
G564A	SNV	chr3:49933274	53.9921	19.0177	17.3924	4.6441	1.1528	3.8009
T565G	SNV	chr3:49933273	44.848	1.9829	37.397	0.4728	13.4527	1.8466
T565C	SNV	chr3:49933273	58.8569	14.3518	18.015	4.3203	1.4957	2.9602
T565A	SNV	chr3:49933273	62.6467	8.6133	20.0885	4.7777	1.7707	2.103
G566T	SNV	chr3:49933272	34.8086	34.3794	23.1518	2.7284	0.9067	4.025
G566A	SNV	chr3:49933272	56.1948	12.7619	23.162	3.1943	2.2374	2.4496
GC567G	DEL	chr3:49933272	63.1792	5.9996	23.4584	0.7271	5.6841	0.9515
C567T	SNV	chr3:49933271	57.2313	10.2213	23.8937	3.8121	3.0132	1.8284
C567G	SNV	chr3:49933271	40.6752	2.5797	43.9179	1.0603	11.0355	0.7314
C567A	SNV	chr3:49933271	39.7672	25.3845	27.4441	3.3591	2.4028	1.6423
G568T	SNV	chr3:49933270	66.0997	7.7105	18.281	4.1901	1.3236	2.3952
G568A	SNV	chr3:49933270	59.9234	11.1804	20.5958	3.6559	2.1792	2.4653
G569T	SNV	chr3:49933269	60.7669	13.1081	16.7235	4.2257	1.3191	3.8566
G569C	SNV	chr3:49933269	50.7195	18.1541	22.0097	4.2432	0.9731	3.9004
G569A	SNV	chr3:49933269	54.6835	16.1302	19.1465	5.0001	1.6683	3.3714
GC570G	DEL	chr3:49933269	65.6326	13.726	13.2058	2.3928	1.2528	3.79
C570T	SNV	chr3:49933268	49.1431	7.4695	35.2542	3.0279	3.5638	1.5414
C570G	SNV	chr3:49933268	42.0221	3.1188	41.3117	1.5284	10.0986	1.9205
C570A	SNV	chr3:49933268	56.0827	10.3045	23.1727	5.64	1.7307	3.0693
C571T	SNV	chr3:49933267	59.3871	6.1203	25.2946	4.2858	3.2289	1.6833
C571G	SNV	chr3:49933267	60.8631	17.0945	13.1989	3.3996	1.704	3.7398
C571A	SNV	chr3:49933267	69.7082	8.8659	13.176	4.4605	1.7947	1.9948
CA572C	DEL	chr3:49933267	57.5926	22.4159	11.6683	3.7183	1.5368	3.0682
A572T	SNV	chr3:49933266	61.3976	10.6708	17.6061	5.3926	2.767	2.1659
A572G	SNV	chr3:49933266	58.2229	9.6493	23.6695	3.3619	3.1718	1.9246
A572C	SNV	chr3:49933266	54.8893	18.0134	17.6397	4.9183	2.0041	2.5352
A572AG	IN	chr3:49933266	70.6369	13.5999	8.1517	2.2028	2.2565	3.1522
AG573A	DEL	chr3:49933266	65.0757	5.2617	10.4446	3.185	4.9625	11.0706
G573T	SNV	chr3:49933265	65.8802	12.308	14.1375	4.2469	1.4936	1.9338
G573A	SNV	chr3:49933265	59.0333	13.4346	18.1646	5.7012	1.4679	2.1984
G574T	SNV	chr3:49933264	66.5549	10.0714	14.7538	2.8853	1.6321	4.1025
G574C	SNV	chr3:49933264	64.0529	11.8578	16.7592	4.3366	1.4354	1.5582
G574A	SNV	chr3:49933264	55.9973	18.1221	14.7039	5.573	0.8723	4.7314
G575T	SNV	chr3:49933263	54.199	18.4406	15.8021	6.7142	1.5055	3.3387
G575C	SNV	chr3:49933263	58.407	15.6567	16.6399	3.7167	1.1505	4.4292
G575A	SNV	chr3:49933263	59.7684	15.075	16.3199	3.8302	1.1612	3.8453
GC576G	DEL	chr3:49933263	67.1022	5.274	15.7841	2.848	6.7571	2.2346
C576T	SNV	chr3:49933262	57.8863	9.4679	24.3641	3.3956	2.67	2.216
C576G	SNV	chr3:49933262	62.9048	7.6524	21.2366	3.025	3.2841	1.897
C576A	SNV	chr3:49933262	60.655	7.4695	23.675	3.5009	2.1098	2.5898
C577T	SNV	chr3:49933261	51.5995	5.9737	34.1702	2.6871	4.002	1.5674
C577G	SNV	chr3:49933261	38.229	28.4098	21.4203	9.6008	0.7418	1.5982
C577A	SNV	chr3:49933261	58.949	8.09	23.546	5.0608	2.2239	2.1303
A578T	SNV	chr3:49933260	59.4749	12.3034	20.7943	3.253	1.9463	2.2281
A578G	SNV	chr3:49933260	61.0978	15.1501	15.7657	4.0643	1.41	2.5121
A578C	SNV	chr3:49933260	49.8463	24.1425	19.247	2.824	1.5355	2.4047
G579T	SNV	chr3:49933259	62.2012	9.8331	19.7689	2.8435	2.5552	2.7981
G579C	SNV	chr3:49933259	62.2534	12.6415	17.5276	3.572	1.5065	2.4991
G579A	SNV	chr3:49933259	50.3987	15.2823	27.4639	2.6691	2.1727	2.0134
A580T	SNV	chr3:49933258	57.4747	10.0414	23.8013	3.1319	1.7755	3.7752
A580G	SNV	chr3:49933258	54.2182	7.3431	30.1512	2.4827	4.4136	1.3912
T581G	SNV	chr3:49933257	72.1286	2.9758	16.5029	3.7834	3.1252	1.4841
T581C	SNV	chr3:49933257	57.1944	13.2521	20.7265	4.8433	1.5417	2.442
T581A	SNV	chr3:49933257	59.2855	13.4536	18.4001	4.2847	1.6264	2.9497
T581TC	IN	chr3:49933257	51.3336	10.1415	27.9785	6.2276	2.7953	1.5235
T581TA	IN	chr3:49933257	61.3281	5.2731	25.4576	3.1439	2.5947	2.2027
TG582T	DEL	chr3:49933257	71.5056	10.6864	10.5826	2.998	1.5899	2.6375
G582T	SNV	chr3:49933256	58.8582	11.8559	22.0383	2.9634	2.4397	1.8445
G582A	SNV	chr3:49933256	46.1063	6.9085	40.5889	2.0623	3.3098	1.0242
G583T	SNV	chr3:49933255	50.0303	10.7136	26.6401	6.963	1.3754	4.2775
G583A	SNV	chr3:49933255	55.7107	16.3251	19.8154	4.7749	1.1498	2.2241
G584T	SNV	chr3:49933254	58.1018	16.1596	17.4732	2.3266	1.8765	4.0624
G584C	SNV	chr3:49933254	49.9543	16.3916	15.9214	9.0825	3.9398	4.7104
G584A	SNV	chr3:49933254	58.8815	17.7141	12.8523	5.5394	0.8716	4.1412
G585T	SNV	chr3:49933253	55.4735	10.1138	23.8618	6.3622	1.186	3.0027
G585C	SNV	chr3:49933253	53.4998	11.2676	28.2667	4.015	1.3971	1.5539
G585A	SNV	chr3:49933253	57.6302	15.0563	18.7361	3.8169	1.5712	3.1893
T586G	SNV	chr3:49933252	55.2416	14.0739	21.2424	4.3203	1.8365	3.2854
T586C	SNV	chr3:49933252	58.3685	13.1868	19.2026	4.234	1.8538	3.1543
T586A	SNV	chr3:49933252	59.2716	15.1553	15.4218	4.9356	0.8705	4.3454
TC587T	DEL	chr3:49933252	63.9049	14.378	14.932	2.8559	1.533	2.3962
C587T	SNV	chr3:49933251	57.3279	11.8188	22.6365	3.5989	2.0715	2.5464
C587G	SNV	chr3:49933251	76.6834	0.3095	5.0812	13.5584	1.7354	2.632
C587A	SNV	chr3:49933251	62.0942	7.5869	20.684	4.1107	3.2642	2.26
C588T	SNV	chr3:49933250	63.194	8.622	20.2683	3.4864	1.5332	2.8962
C588A	SNV	chr3:49933250	54.5939	12.2562	22.7555	5.7318	1.1858	3.4768
C589T	SNV	chr3:49933249	60.3251	9.7095	21.2805	4.5125	1.3394	2.8329
C589G	SNV	chr3:49933249	50.716	16.7843	22.145	4.4104	2.616	3.3282
C589A	SNV	chr3:49933249	57.2631	11.9308	21.3795	4.3519	1.5436	3.5311
A590T	SNV	chr3:49933248	54.7614	12.1588	24.0956	3.9334	2.7212	2.3295
A590G	SNV	chr3:49933248	58.8037	11.7313	20.3343	4.3529	1.9923	2.7855
A590C	SNV	chr3:49933248	39.3508	19.881	29.3837	5.1029	2.7109	3.5707
C591T	SNV	chr3:49933247	59.1223	7.7478	24.9373	3.7748	2.6535	1.7643
C591G	SNV	chr3:49933247	56.8598	11.8333	21.8011	4.3539	1.9169	3.2351
C591A	SNV	chr3:49933247	59.4492	7.7438	23.467	4.1438	2.9464	2.2498
A592T	SNV	chr3:49933246	59.7539	9.8525	20.4647	5.7625	1.9705	2.1959
A592G	SNV	chr3:49933246	55.399	7.6639	27.4108	3.9626	3.8809	1.6828
A592C	SNV	chr3:49933246	54.1621	13.9498	21.5162	6.0231	1.5822	2.7666
G593T	SNV	chr3:49933245	54.0298	12.3608	26.2938	3.6195	2.1469	1.5492
G593A	SNV	chr3:49933245	61.0453	12.3139	18.9552	3.5801	1.6515	2.4541
A594T	SNV	chr3:49933244	54.0292	11.4904	25.9524	4.0723	2.1714	2.2844
A594G	SNV	chr3:49933244	44.3415	5.8748	40.8284	3.2558	4.4539	1.2457
A594C	SNV	chr3:49933244	52.8252	12.9146	23.8536	6.714	2.1418	1.5507
G595T	SNV	chr3:49933243	59.2656	12.7814	19.8525	4.2662	1.5186	2.3157
G595C	SNV	chr3:49933243	46.768	16.8924	21.0385	5.9227	4.4619	4.9166
G595A	SNV	chr3:49933243	56.7555	15.8267	16.6388	5.9214	1.3927	3.4648
C596T	SNV	chr3:49933242	57.9573	11.4563	22.0481	3.5671	2.148	2.8232
C596A	SNV	chr3:49933242	59.8981	14.4246	17.0177	3.8389	2.1425	2.6781
A597T	SNV	chr3:49933241	63.2325	11.1437	17.492	4.0179	1.8129	2.3011
A597G	SNV	chr3:49933241	56.954	13.3629	20.8354	4.4241	1.811	2.6126
A597C	SNV	chr3:49933241	52.5201	16.6076	25.0929	2.2806	1.7741	1.7247
C598T	SNV	chr3:49933240	62.2265	9.9392	20.5214	3.064	2.0316	2.2174
C598G	SNV	chr3:49933240	54.557	6.8658	30.3289	2.4269	3.5836	2.238
C598A	SNV	chr3:49933240	53.7525	10.3386	29.0022	1.6555	2.4086	2.8426
G599T	SNV	chr3:49933239	60.4735	12.2892	17.562	2.8091	1.3928	5.4735
G599A	SNV	chr3:49933239	60.5654	10.9905	20.3459	4.0432	1.953	2.102
C600T	SNV	chr3:49933238	55.5765	12.4014	19.9896	8.3721	1.2453	2.4151
C600A	SNV	chr3:49933238	59.2974	11.7375	21.6755	3.5579	1.789	1.9427
T601C	SNV	chr3:49933237	54.6892	9.4107	26.053	4.6451	2.8576	2.3444
T601A	SNV	chr3:49933237	58.9986	8.0341	24.9145	3.0722	2.9667	2.0139
TC602T	DEL	chr3:49933237	66.6345	13.4668	13.3564	2.3515	1.9401	2.2507
C602T	SNV	chr3:49933236	65.6984	10.4161	15.0304	4.2508	1.8933	2.711
C602G	SNV	chr3:49933236	58.717	12.3395	18.7553	3.1569	2.9327	4.0986
C603T	SNV	chr3:49933235	50.2094	8.9904	30.6568	4.8084	3.4483	1.8866
C603G	SNV	chr3:49933235	60.5716	11.9311	17.9777	4.4145	2.4512	2.6538
C603A	SNV	chr3:49933235	55.3726	10.815	24.5681	4.3218	2.4225	2.5
CT604C	DEL	chr3:49933235	59.6921	20.3572	12.501	2.8878	1.6624	2.8996
T604G	SNV	chr3:49933234	60.8358	6.8377	23.1526	3.3424	3.4597	2.3718
T604C	SNV	chr3:49933234	56.1019	11.692	21.5617	5.2812	2.7786	2.5846
T604A	SNV	chr3:49933234	59.4017	11.5261	20.6094	4.3792	1.7668	2.3169
T605G	SNV	chr3:49933233	59.297	8.3886	22.6468	3.8416	3.0059	2.8201
T605C	SNV	chr3:49933233	61.773	11.6305	17.9141	4.4188	1.1633	3.1004
T605A	SNV	chr3:49933233	58.4646	8.4285	24.9842	2.6246	3.6029	1.8952
TG606T	DEL	chr3:49933233	59.647	18.1787	15.2139	2.5963	1.7741	2.59
G606T	SNV	chr3:49933232	57.0211	13.3411	22.1502	3.0462	1.8182	2.6232
G606A	SNV	chr3:49933232	53.3011	7.9633	29.1402	3.7904	3.2927	2.5123
G607T	SNV	chr3:49933231	44.9637	17.7744	27.7735	2.1972	3.2377	4.0537
G607C	SNV	chr3:49933231	54.166	8.6936	23.176	4.7923	4.5429	4.6291
G607A	SNV	chr3:49933231	57.0303	11.5385	22.3833	4.3824	2.1535	2.512
T608C	SNV	chr3:49933230	53.4369	14.1628	23.8025	3.8199	1.766	3.0119
T608A	SNV	chr3:49933230	56.7567	17.4555	15.3714	3.7651	1.6729	4.9783
A609T	SNV	chr3:49933229	68.1221	9.3935	16.0118	2.578	1.4333	2.4614
A609G	SNV	chr3:49933229	61.2131	12.2851	18.4925	3.5431	1.81	2.6562
T610G	SNV	chr3:49933228	60.9367	11.4837	20.4701	2.5411	3.2077	1.3607
T610C	SNV	chr3:49933228	54.8091	8.4902	28.4043	3.4893	3.5644	1.2427
T610A	SNV	chr3:49933228	58.6491	9.9114	22.2175	4.0689	1.8633	3.2898
C611T	SNV	chr3:49933227	57.035	12.6978	20.9397	3.6534	1.6398	4.0343
C611G	SNV	chr3:49933227	63.2371	7.0097	20.1169	3.8773	3.7796	1.9795
C611A	SNV	chr3:49933227	57.0931	9.9026	25.0714	3.609	1.8283	2.4956
C612T	SNV	chr3:49933226	57.9852	7.4953	25.5552	3.7132	2.9608	2.2903
C612G	SNV	chr3:49933226	53.1892	8.0605	29.7084	3.3794	3.325	2.3375
C612A	SNV	chr3:49933226	58.6578	8.6121	23.9474	3.4189	2.8929	2.471
CT613C	DEL	chr3:49933226	71.6656	14.2207	8.5421	1.1605	0.7718	3.6393
T613C	SNV	chr3:49933225	62.7352	10.2749	19.6966	3.2517	1.9705	2.0711
T613A	SNV	chr3:49933225	57.3454	12.3789	21.88	3.2579	2.2622	2.8755
G614T	SNV	chr3:49933224	57.8729	8.6128	25.6032	2.6906	2.3977	2.8227
G614C	SNV	chr3:49933224	61.0611	11.2713	17.8278	2.8729	3.2833	3.6837
G614A	SNV	chr3:49933224	56.5107	8.6397	26.9592	3.5496	2.6446	1.6962
C615T	SNV	chr3:49933223	55.8251	8.5278	26.8102	3.7374	2.7729	2.3266
C615G	SNV	chr3:49933223	55.4715	12.5757	23.1733	3.1333	2.8723	2.7739
C615A	SNV	chr3:49933223	57.581	11.9865	22.1309	3.7624	2.532	2.0073
T616C	SNV	chr3:49933222	61.7506	10.4869	20.0612	3.4579	2.2231	2.0204
T616A	SNV	chr3:49933222	49.3975	10.7604	25.2824	3.5903	2.2595	8.7098
G617T	SNV	chr3:49933221	57.9583	14.0152	19.4271	2.3105	3.6794	2.6094
G617C	SNV	chr3:49933221	59.1102	10.0612	21.6583	4.4856	2.2415	2.4433
G617A	SNV	chr3:49933221	58.7389	11.0171	21.3615	3.9819	2.0025	2.898
GC618G	DEL	chr3:49933221	63.5426	17.4812	10.1431	3.4084	1.5619	3.8627
C618T	SNV	chr3:49933220	59.9815	14.8064	16.9755	4.4158	1.1254	2.6954
C618G	SNV	chr3:49933220	57.7196	13.6163	15.0151	10.2468	1.423	1.9792
C618A	SNV	chr3:49933220	64.8775	15.1791	10.4121	4.7252	1.9569	2.8493
C619T	SNV	chr3:49933219	65.7411	10.3935	15.4949	3.7017	1.8175	2.8513
C619G	SNV	chr3:49933219	61.5608	13.3191	15.2544	4.553	1.4819	3.8308
C619A	SNV	chr3:49933219	63.2261	11.9211	16.2779	4.716	1.0893	2.7697
C619CT	IN	chr3:49933219	68.6917	14.1559	9.2014	3.4101	0.9799	3.561
CT620C	DEL	chr3:49933219	57.0736	22.5955	12.842	2.2886	1.3347	3.8656
T620G	SNV	chr3:49933218	61.8505	13.746	16.4741	3.3685	1.1517	3.4092
T620C	SNV	chr3:49933218	54.6284	14.223	21.2657	5.4645	1.7549	2.6635
T620A	SNV	chr3:49933218	56.7667	11.9813	21.8916	4.5395	2.0036	2.8174
T621G	SNV	chr3:49933217	51.3057	17.087	23.9735	3.4454	2.0268	2.1615
T621C	SNV	chr3:49933217	63.2422	11.3733	17.1549	2.9288	2.2521	3.0487
T621A	SNV	chr3:49933217	58.7994	12.7274	18.9284	5.138	1.3839	3.0229
T622C	SNV	chr3:49933216	65.8428	11.1249	15.2063	2.8344	1.5786	3.413
T622A	SNV	chr3:49933216	57.6333	10.4032	22.4814	3.8663	2.4055	3.2104
G623T	SNV	chr3:49933215	34.5088	3.2595	46.5376	5.6592	8.1413	1.8937
G623A	SNV	chr3:49933215	61.4564	13.2165	16.1735	4.4434	1.3932	3.3169
C624T	SNV	chr3:49933214	60.8825	12.422	17.7507	4.1641	1.4863	3.2944
C624G	SNV	chr3:49933214	54.4765	9.7039	26.3113	4.9107	2.7677	1.8299
C624A	SNV	chr3:49933214	56.9038	18.0822	15.6484	3.1443	1.4958	4.7255
T625G	SNV	chr3:49933213	56.5113	11.9118	23.3892	4.7174	1.9722	1.4981
T625C	SNV	chr3:49933213	60.8485	9.5558	20.7831	3.6618	2.335	2.8159
T625A	SNV	chr3:49933213	46.702	11.2197	33.1956	3.6651	2.541	2.6767
G626T	SNV	chr3:49933212	54.2146	20.6278	18.0667	3.2184	1.3633	2.5093
G626A	SNV	chr3:49933212	58.5557	11.4465	21.3363	3.6341	2.2079	2.8195
C627T	SNV	chr3:49933211	57.5453	12.0244	21.2879	4.3496	2.49	2.3028
C627G	SNV	chr3:49933211	58.313	9.8181	23.2305	3.9437	2.4888	2.2059
C627A	SNV	chr3:49933211	55.0592	15.0139	18.1521	6.1184	1.7011	3.9552
T628G	SNV	chr3:49933210	52.7212	12.2947	23.484	5.8726	2.9949	2.6326
T628C	SNV	chr3:49933210	63.4433	9.2624	20.0212	3.6377	1.627	2.0084
T628A	SNV	chr3:49933210	56.8737	8.8965	25.9483	3.8673	2.0239	2.3903
TG629T	DEL	chr3:49933210	66.0986	9.346	15.816	3.6206	2.684	2.4347
G629T	SNV	chr3:49933209	57.1425	12.5434	22.335	3.7907	1.8658	2.3226
G629C	SNV	chr3:49933209	56.4195	12.1407	23.3991	3.4438	1.7792	2.8177
G629A	SNV	chr3:49933209	54.1562	11.1939	25.877	3.9303	2.1042	2.7384
C630T	SNV	chr3:49933208	56.5327	12.9134	23.2254	3.9169	1.3269	2.0848
C630G	SNV	chr3:49933208	62.4352	9.369	18.5683	5.2002	2.7107	1.7166
C630A	SNV	chr3:49933208	57.7389	11.8122	21.7513	4.9304	1.7845	1.9827
T631G	SNV	chr3:49933207	57.583	14.5275	16.8602	6.4573	2.1541	2.4178
T631C	SNV	chr3:49933207	63.3802	11.425	17.7546	2.87	1.9943	2.5759
T631A	SNV	chr3:49933207	57.5877	11.2974	20.9698	5.2595	1.7112	3.1744
T632C	SNV	chr3:49933206	61.322	11.5981	19.1318	3.7289	1.569	2.6502
T632A	SNV	chr3:49933206	60.7512	9.2308	22.2443	2.6769	2.4071	2.6897
G633T	SNV	chr3:49933205	57.3447	8.0142	27.3068	3.2808	1.3776	2.6759
G633C	SNV	chr3:49933205	62.578	15.693	14.3843	4.0861	0.8102	2.4484
G633A	SNV	chr3:49933205	56.7223	11.3454	22.563	3.7551	2.972	2.6422
T634C	SNV	chr3:49933204	53.744	13.8083	22.9445	4.8824	2.0446	2.5762
T634A	SNV	chr3:49933204	56.154	13.0106	21.1714	5.2341	1.6499	2.78
TG635T	DEL	chr3:49933204	65.5111	15.286	10.8515	2.6854	0.8408	4.8252
G635T	SNV	chr3:49933203	56.2366	15.9677	19.9009	4.2594	1.6698	1.9655
G635C	SNV	chr3:49933203	53.9616	6.455	30.5518	2.9182	3.0456	3.0679
G635A	SNV	chr3:49933203	62.661	8.4486	21.1436	3.691	2.1515	1.9043
G636T	SNV	chr3:49933202	51.0791	17.2851	18.3945	6.5053	1.6546	5.0814
G636C	SNV	chr3:49933202	62.8607	11.6552	17.171	3.5242	2.2934	2.4955
G636A	SNV	chr3:49933202	57.6798	13.9614	16.5844	6.6497	1.4918	3.6329
C637T	SNV	chr3:49933201	57.2435	10.8263	23.2511	4.0934	2.3239	2.2617
C637G	SNV	chr3:49933201	63.5454	16.8098	11.4589	6.307	0.8148	1.064
C637A	SNV	chr3:49933201	59.4118	18.2213	14.1343	3.7394	1.2217	3.2716
T638C	SNV	chr3:49933200	61.2464	9.588	21.7932	3.387	1.8612	2.1242
T638A	SNV	chr3:49933200	58.1471	9.2473	23.8725	4.6723	2.0304	2.0305
G639T	SNV	chr3:49933199	59.7515	12.7749	17.106	4.5746	1.8113	3.9818
G639C	SNV	chr3:49933199	56.7995	11.3482	22.539	4.2442	1.8298	3.2394
G639A	SNV	chr3:49933199	61.5416	14.5328	15.6206	4.3039	1.4815	2.5196
C640T	SNV	chr3:49933198	68.704	9.8609	15.4189	1.9869	1.6251	2.4043
C640G	SNV	chr3:49933198	50.8304	14.4976	25.7465	0.1189	6.7634	2.0433
C640A	SNV	chr3:49933198	57.5953	10.3287	24.5634	2.345	3.5863	1.5813
A641T	SNV	chr3:49933197	62.57	10.4394	17.0024	5.7812	2.2058	2.0012
A641G	SNV	chr3:49933197	59.7861	13.3386	18.4283	3.5025	2.0534	2.8911
A641C	SNV	chr3:49933197	69.6471	7.8488	15.5788	2.6301	2.0844	2.2108
C642T	SNV	chr3:49933196	58.3644	11.8922	21.4955	3.7664	2.1941	2.2873
C642G	SNV	chr3:49933196	64.773	10.027	18.8724	2.365	1.4413	2.5213
C642A	SNV	chr3:49933196	64.0384	8.307	19.6594	3.711	2.4913	1.793
T643G	SNV	chr3:49933195	55.859	12.6084	23.979	3.3241	2.4329	1.7965
T643C	SNV	chr3:49933195	62.5871	12.8544	15.7699	4.0769	1.747	2.9648
T643A	SNV	chr3:49933195	60.0932	11.9049	21.2918	2.8842	1.6356	2.1902
G644T	SNV	chr3:49933194	59.7417	11.9949	19.2309	5.0688	1.5667	2.397
G644C	SNV	chr3:49933194	58.9608	14.6075	17.5811	4.6055	1.4117	2.8334
G644A	SNV	chr3:49933194	57.6154	12.0791	20.9907	4.6149	1.7062	2.9938
G645T	SNV	chr3:49933193	56.2009	13.6549	20.5313	5.742	1.6759	2.1951
G645C	SNV	chr3:49933193	57.5771	17.9801	13.9112	2.7799	1.2312	6.5205
G645A	SNV	chr3:49933193	61.3559	15.016	14.5318	4.422	1.4644	3.21
C646T	SNV	chr3:49933192	62.6745	5.9054	23.4615	2.2471	3.6436	2.0678
C646G	SNV	chr3:49933192	63.8877	6.7251	19.5871	3.8886	2.2811	3.6305
C646A	SNV	chr3:49933192	62.5158	7.6145	21.0548	5.0955	1.6764	2.0431
G647T	SNV	chr3:49933191	46.1151	7.269	32.7624	9.4654	1.8692	2.5189
G647C	SNV	chr3:49933191	55.7321	7.5901	29.1383	1.8052	3.4569	2.2774
G647A	SNV	chr3:49933191	60.5591	9.5129	22.1796	3.4695	2.3467	1.9322
A648T	SNV	chr3:49933190	55.938	13.2748	23.232	3.9461	1.4797	2.1294
A648G	SNV	chr3:49933190	57.0435	6.7292	28.9671	2.8105	2.9393	1.5103
A648C	SNV	chr3:49933190	57.4076	10.604	24.3178	3.5306	0.6221	3.5178
C649T	SNV	chr3:49933189	59.2042	10.3621	22.7344	3.4833	1.764	2.4519
C649G	SNV	chr3:49933189	65.8525	12.3878	15.8101	2.5361	1.566	1.8475
C649A	SNV	chr3:49933189	62.8303	13.157	15.6993	3.5084	2.0515	2.7535
T650G	SNV	chr3:49933188	53.1419	16.3692	21.6549	4.8834	1.941	2.0095
T650C	SNV	chr3:49933188	56.272	8.0912	27.685	2.5381	3.1937	2.2201
T650A	SNV	chr3:49933188	55.6651	10.7272	24.9932	4.1843	2.039	2.3911
G651T	SNV	chr3:49933187	63.0135	11.8128	17.2284	3.3769	1.6928	2.8755
G651C	SNV	chr3:49933187	45.6074	16.342	27.3752	3.5747	2.6791	4.4216
G651A	SNV	chr3:49933187	57.7676	11.167	22.0881	4.6046	2.1514	2.2213
C652T	SNV	chr3:49933186	57.1453	10.2193	24.8232	3.8812	2.2748	1.6562
C652G	SNV	chr3:49933186	68.1422	12.1474	12.8733	4.4323	1.026	1.3788
C652A	SNV	chr3:49933186	62.488	10.8735	15.4539	6.8294	2.5899	1.7653
A653T	SNV	chr3:49933185	55.9558	13.8336	22.5529	2.7839	2.1465	2.7274
A653G	SNV	chr3:49933185	55.8011	5.523	30.3459	0.8225	5.6418	1.8658
A653C	SNV	chr3:49933185	54.1952	9.9983	27.9367	2.642	3.0384	2.1893
C654T	SNV	chr3:49933184	56.7482	14.391	18.8457	6.3896	1.3151	2.3104
C654G	SNV	chr3:49933184	60.367	6.8263	24.7817	2.8906	2.4948	2.6396
C654A	SNV	chr3:49933184	60.017	10.7896	20.5804	4.7063	1.7781	2.1285
T655G	SNV	chr3:49933183	55.9541	16.0228	18.7817	6.1858	1.6673	1.3883
T655C	SNV	chr3:49933183	59.2997	10.5903	21.7441	3.881	1.9882	2.4967
T655A	SNV	chr3:49933183	59.9435	11.205	21.1163	3.6932	1.87	2.172
TG656T	DEL	chr3:49933183	53.7412	22.3869	13.239	7.6242	1.9425	1.0662
G656T	SNV	chr3:49933182	58.4943	11.9748	21.5859	3.9982	1.8202	2.1265
G656C	SNV	chr3:49933182	65.2332	9.6748	17.8863	3.8567	1.4763	1.8728
G656A	SNV	chr3:49933182	57.2688	10.6462	24.2328	3.2395	2.1913	2.4213
G657C	SNV	chr3:49933181	60.7201	12.2365	16.9616	4.5854	2.0535	3.4429
G657A	SNV	chr3:49933181	59.3927	13.4665	18.9889	4.3207	1.551	2.2803
T658G	SNV	chr3:49933180	57.6464	4.3438	26.2227	4.1661	3.381	4.2399
T658C	SNV	chr3:49933180	59.1167	11.137	21.4182	3.8646	2.0749	2.3886
T658A	SNV	chr3:49933180	53.7382	13.3593	22.7357	5.9258	1.4885	2.7524
C659T	SNV	chr3:49933179	59.6724	9.2403	22.8295	2.5405	2.7458	2.9714
C659A	SNV	chr3:49933179	57.0502	12.1473	24.7947	1.2953	3.0737	1.6388
T660C	SNV	chr3:49933178	56.9851	10.0479	24.851	3.0029	2.5613	2.5518
T660A	SNV	chr3:49933178	54.9375	11.4475	24.4059	4.2801	2.4793	2.4498
T661G	SNV	chr3:49933177	63.108	11.8849	17.1458	2.1351	4.1296	1.5966
T661C	SNV	chr3:49933177	59.8802	10.791	22.3784	2.7446	2.1997	2.0061
T661A	SNV	chr3:49933177	60.5563	12.368	19.5305	3.7556	1.8278	1.9617
C662T	SNV	chr3:49933176	53.3697	6.2796	31.4518	2.0156	5.3108	1.5726
C662A	SNV	chr3:49933176	60.4919	5.3455	28.6528	0.9858	3.1698	1.3543
A663T	SNV	chr3:49933175	59.0459	8.9231	24.2877	3.4811	2.1385	2.1238
A663G	SNV	chr3:49933175	60.7632	11.3567	19.0773	4.1324	1.7752	2.8952
A663C	SNV	chr3:49933175	49.8484	10.5419	30.5618	2.7802	3.0037	3.264
G664T	SNV	chr3:49933174	61.7717	10.0529	19.2651	3.6256	2.5147	2.77
G664C	SNV	chr3:49933174	56.342	10.3795	27.7297	1.6338	1.857	2.058
G664A	SNV	chr3:49933174	51.9686	16.8512	21.6144	4.9342	1.9671	2.6645
C665T	SNV	chr3:49933173	57.9763	9.7096	23.9078	3.3535	2.4924	2.5603
C665G	SNV	chr3:49933173	65.4959	7.5628	18.9216	3.6565	2.3814	1.9819
C665A	SNV	chr3:49933173	56.8164	12.0276	23.4607	3.3213	2.0963	2.2777
T666G	SNV	chr3:49933172	53.2042	8.1892	30.5949	0.7593	6.42	0.8325
T666C	SNV	chr3:49933172	58.0024	10.2332	24.5007	2.0596	3.3653	1.8388
T666A	SNV	chr3:49933172	57.7602	13.1389	20.8419	4.5319	1.3254	2.4017
A667T	SNV	chr3:49933171	55.5093	14.3199	20.6148	4.3103	2.3363	2.9094
A667G	SNV	chr3:49933171	57.5449	9.9687	23.8604	4.3428	2.0899	2.1934
C668T	SNV	chr3:49933170	60.3597	9.9391	21.4324	3.552	1.9913	2.7254
C668A	SNV	chr3:49933170	61.9155	7.5639	21.9784	4.3202	2.4495	1.7725
T669G	SNV	chr3:49933169	46.6089	20.7654	25.5094	2.1184	1.449	3.5489
T669C	SNV	chr3:49933169	58.4536	10.238	23.7404	2.7504	2.0869	2.7306
T669A	SNV	chr3:49933169	63.2209	10.139	18.3889	4.38	1.9309	1.9403
TG670T	DEL	chr3:49933169	59.5923	22.9287	10.4023	3.4882	0.8356	2.7529
G670T	SNV	chr3:49933168	60.3759	9.4215	21.4403	3.9622	2.4447	2.3555
G670C	SNV	chr3:49933168	59.2008	10.8259	20.2508	5.4312	1.7178	2.5736
G670A	SNV	chr3:49933168	59.1016	12.4386	21.3048	2.5388	2.0521	2.5642
G671T	SNV	chr3:49933167	65.2802	17.0528	9.2726	3.9387	1.4534	3.0023
G671A	SNV	chr3:49933167	55.9366	13.0916	22.23	4.9777	1.738	2.0261
GT672G	DEL	chr3:49933167	84.3629	4.3849	5.5456	3.5994	0.4179	1.6893
T672G	SNV	chr3:49933166	64.2395	8.1837	20.3674	0.7938	2.0695	4.346
T672C	SNV	chr3:49933166	58.1556	14.6577	19.207	3.4378	1.9102	2.6317
T672A	SNV	chr3:49933166	58.0808	11.2482	21.6732	4.5887	1.9289	2.4803
TG673T	DEL	chr3:49933166	68.964	10.316	14.5447	1.9447	1.9672	2.2634
G673T	SNV	chr3:49933165	60.3103	13.1414	19.5889	3.4384	1.3623	2.1586
G673C	SNV	chr3:49933165	49.2324	11.0422	25.9748	7.5269	2.8977	3.326
G673A	SNV	chr3:49933165	55.6352	11.8466	24.4255	3.2885	2.4879	2.3162
G674T	SNV	chr3:49933164	57.5896	13.2565	21.8984	3.8757	1.3992	1.9806
G674C	SNV	chr3:49933164	59.2174	8.7825	24.1787	2.7968	3.1132	1.9114
G674A	SNV	chr3:49933164	57.8514	12.6312	19.2508	6.0048	1.6168	2.6451
C675T	SNV	chr3:49933163	62.6179	9.6343	19.565	3.7419	1.8887	2.5522
C675G	SNV	chr3:49933163	62.2304	9.0214	20.9831	1.8435	3.4261	2.4955
C675A	SNV	chr3:49933163	55.6667	13.8247	22.5763	3.5028	1.7705	2.6591
CG676C	DEL	chr3:49933163	61.3258	18.83	11.0235	1.6761	1.3029	5.8417
G676T	SNV	chr3:49933162	59.8786	7.9706	24.9473	2.2506	2.4543	2.4986
G676C	SNV	chr3:49933162	54.0602	12.6138	22.0922	6.3399	1.8987	2.9951
G676A	SNV	chr3:49933162	60.0332	9.5477	22.2047	2.5712	2.6501	2.993
G677T	SNV	chr3:49933161	65.5828	8.5746	19.3721	1.5422	3.1055	1.8228
G677A	SNV	chr3:49933161	42.7488	19.2736	28.8946	3.6634	2.6668	2.7528
A678T	SNV	chr3:49933160	59.1682	11.3164	20.5757	3.7667	3.369	1.8041
A678G	SNV	chr3:49933160	57.2723	9.1555	25.6683	2.8237	2.8073	2.2729
AG679A	DEL	chr3:49933160	72.3466	11.8238	8.7838	2.264	1.1145	3.6673
G679T	SNV	chr3:49933159	56.9938	13.4441	20.5204	4.208	1.8569	2.9768
G679A	SNV	chr3:49933159	61.927	11.3077	17.6881	4.7656	1.5809	2.7308
G680T	SNV	chr3:49933158	52.0945	14.3174	24.849	4.6353	2.1982	1.9056
G680A	SNV	chr3:49933158	61.6146	11.7959	18.8357	3.1248	1.831	2.7979
GA681G	DEL	chr3:49933158	76.2441	8.8125	11.1554	1.6715	1.0012	1.1152
A681T	SNV	chr3:49933157	55.9837	10.5406	24.5926	2.6446	3.5448	2.6938
A681G	SNV	chr3:49933157	66.9928	7.6055	17.8789	3.7266	1.9874	1.8087
A682T	SNV	chr3:49933156	59.3727	10.4677	20.9886	4.0691	2.0578	3.0441
A682G	SNV	chr3:49933156	62.4312	9.03	21.2807	2.6976	2.7625	1.798
G683T	SNV	chr3:49933155	60.8084	14.5299	16.3263	3.646	1.5314	3.1581
G683C	SNV	chr3:49933155	54.326	18.2381	19.5838	3.3743	1.69	2.7878
G683A	SNV	chr3:49933155	53.2684	12.9653	22.5865	6.244	2.5155	2.4204
C684T	SNV	chr3:49933154	60.7154	11.7361	19.814	3.2116	2.04	2.4829
C684G	SNV	chr3:49933154	63.6622	5.0293	26.1914	0.3339	3.0245	1.7588
C684A	SNV	chr3:49933154	58.6825	11.5099	21.3933	4.745	1.6604	2.009
A685T	SNV	chr3:49933153	58.8265	11.5429	21.2165	3.7695	1.7894	2.8552
A685G	SNV	chr3:49933153	59.2361	11.6367	21.1017	3.7879	2.0632	2.1744
A685C	SNV	chr3:49933153	48.3967	10.4597	32.2851	4.3622	1.425	3.0714
G686T	SNV	chr3:49933152	57.535	11.3971	21.1103	4.7874	1.5418	3.6284
G686C	SNV	chr3:49933152	62.8107	13.3402	18.1672	2.2987	2.1696	1.2136
G686A	SNV	chr3:49933152	55.4806	13.4266	22.0703	4.7859	2.0144	2.2222
C687T	SNV	chr3:49933151	55.7855	12.1777	23.3038	2.719	2.6089	3.4051
C687G	SNV	chr3:49933151	52.8392	11.4687	28.2745	2.7564	2.9603	1.701
C687A	SNV	chr3:49933151	63.0517	8.164	21.2269	3.3419	1.5818	2.6336
T688G	SNV	chr3:49933150	57.5022	12.3943	22.471	3.582	1.7998	2.2506
T688C	SNV	chr3:49933150	53.3658	12.5258	25.4105	4.4281	2.0468	2.223
T688A	SNV	chr3:49933150	55.3542	11.3704	25.9208	3.4858	2.4172	1.4514
A689T	SNV	chr3:49933149	59.8265	12.394	19.8602	2.9298	1.8353	3.1541
A689G	SNV	chr3:49933149	60.1654	12.7296	18.9755	3.6028	1.8621	2.6645
A689C	SNV	chr3:49933149	63.2104	12.1029	17.5225	3.2603	1.3757	2.5283
G690T	SNV	chr3:49933148	67.4767	6.5787	18.016	1.3086	4.4422	2.1777
G690C	SNV	chr3:49933148	73.2553	5.3727	14.0879	1.3762	2.3729	3.535
G690A	SNV	chr3:49933148	46.8862	3.6915	39.0524	1.0629	8.262	1.045
G691T	SNV	chr3:49933147	18.6433	3.9839	52.4349	0.0122	24.1091	0.8166
G691A	SNV	chr3:49933147	14.3323	1.2107	67.7451	0.1452	16.1044	0.4623
T692G	SNV	chr3:49933146	10.6432	1.1941	61.5544	0.33	24.3667	1.9115
T692C	SNV	chr3:49933146	19.8241	3.4487	61.7293	0.2264	14.316	0.4555
T692A	SNV	chr3:49933146	10.6568	1.5219	68.0402	0.3493	19.0629	0.369
G693T	SNV	chr3:49933145	19.0158	2.1177	70.2355	0.0141	8.2789	0.3379
G693C	SNV	chr3:49933145	50.6165	4.0995	29.0535	0.4674	13.9532	1.81
G693A	SNV	chr3:49933145	54.4629	13.2449	23.0716	5.7267	1.4098	2.0842
A694T	SNV	chr3:49933144	24.4422	1.9803	59.073	0.1716	13.69	0.6429
A694G	SNV	chr3:49933144	40.0195	3.3161	46.5497	0.3583	8.707	1.0494
A694C	SNV	chr3:49933144	49.5905	1.3914	40.1686	0.0281	8.3798	0.4416
G695T	SNV	chr3:49933143	39.3443	3.2358	48.5013	0.1013	7.8186	0.9986
G695A	SNV	chr3:49933143	23.2932	2.3831	56.956	0.1752	15.4672	1.7252
T696C	SNV	chr3:49933142	58.189	5.9649	26.9191	0.7562	6.1137	2.057
T696A	SNV	chr3:49933142	67.8696	7.994	18.2929	1.2501	2.6152	1.9783
T697G	SNV	chr3:49933141	69.7073	13.9727	9.4795	1.2228	2.7743	2.8433
T697C	SNV	chr3:49933141	61.5615	9.5569	21.5128	2.8254	2.7716	1.7718
T697A	SNV	chr3:49933141	50.3662	14.8372	25.1965	5.7685	1.8488	1.9829
C698T	SNV	chr3:49933140	60.887	11.1673	20.0102	3.4458	2.0065	2.4833
C698A	SNV	chr3:49933140	51.496	13.4807	25.3475	5.0072	2.502	2.1666
T699C	SNV	chr3:49933139	56.9009	13.0068	21.4265	4.8918	1.7471	2.027
T699A	SNV	chr3:49933139	57.2985	9.8754	22.4909	4.7289	2.8303	2.776
C700T	SNV	chr3:49933138	56.2018	11.3145	22.7929	5.2528	2.196	2.242
C700G	SNV	chr3:49933138	60.2479	12.0414	21.1131	2.4277	1.6156	2.5543
C700A	SNV	chr3:49933138	53.4317	11.5681	27.6903	2.596	2.0253	2.6885
T701G	SNV	chr3:49933137	63.4757	4.5055	15.3625	11.4203	2.4526	2.7834
T701C	SNV	chr3:49933137	56.3615	11.8606	23.6005	3.5783	2.3558	2.2434
T701A	SNV	chr3:49933137	59.8108	10.2983	20.4882	4.5694	2.0372	2.7961
TG702T	DEL	chr3:49933137	61.757	17.7501	11.7076	2.5855	2.3576	3.8422
G702T	SNV	chr3:49933136	65.3923	13.1428	14.3576	3.9114	1.1201	2.0758
G702C	SNV	chr3:49933136	58.0748	8.6806	22.9979	5.1613	2.9847	2.1007
G702A	SNV	chr3:49933136	61.2935	10.7459	20.4863	4.0722	1.7351	1.6669
C703T	SNV	chr3:49933135	57.7034	11.8886	20.5643	5.4524	1.4982	2.8932
C703G	SNV	chr3:49933135	45.6796	18.7786	23.6718	8.4081	1.5764	1.8855
C703A	SNV	chr3:49933135	53.7899	11.5604	25.7397	3.227	2.5848	3.0982
CT704C	DEL	chr3:49933135	61.8078	14.0726	16.3612	2.7332	1.4805	3.5447
T704G	SNV	chr3:49933134	68.1643	13.0484	13.203	2.6639	1.05	1.8703
T704C	SNV	chr3:49933134	56.1308	12.319	21.9213	5.0456	1.8756	2.7077
T704A	SNV	chr3:49933134	58.6365	12.9214	20.8584	3.3113	1.9456	2.3268
T704TC	IN	chr3:49933134	53.8565	12.9732	16.8099	13.9807	1.1204	1.2593

## Sheet: HEK293T rep2
mutation	mutation type	genomic position	AE inclusion (%)	AE skipping (%)	full IR (%)	first IR (%)	second IR (%)	other (%)
wt mean	-	-	64.5	6.77	18.75	5.44	2.14	2.04
wt SD	-	-	2.7	0.91	2.39	0.85	0.47	0.46
A26T	SNV	chr3:49933812	62.744	6.932	19.274	7.3306	2.0014	1.7183
A26G	SNV	chr3:49933812	58.583	6.1534	24.602	6.0688	2.4208	2.1723
G27T	SNV	chr3:49933811	66.711	7.0324	14.945	5.5742	2.3591	3.3787
G27C	SNV	chr3:49933811	58.226	10.191	20.698	6.206	1.6309	3.0476
G27A	SNV	chr3:49933811	60.016	5.8091	23.827	5.4893	2.837	2.0219
C28T	SNV	chr3:49933810	64.442	6.1385	19.288	6.0987	2.1673	1.8653
C28G	SNV	chr3:49933810	55.711	6.936	24.25	11.132	1.197	0.77457
C28A	SNV	chr3:49933810	54.969	8.6127	22.359	9.4752	2.2132	2.3714
T29G	SNV	chr3:49933809	63.751	7.7158	17.66	5.854	2.773	2.2456
T29C	SNV	chr3:49933809	66.403	6.8357	18.287	4.9898	2.0978	1.3868
T29A	SNV	chr3:49933809	60.683	6.7572	22.407	5.8031	2.4585	1.8916
G30T	SNV	chr3:49933808	63.03	4.317	21.25	6.8823	2.0837	2.4372
G30A	SNV	chr3:49933808	62.89	6.7156	20.513	5.8745	2.057	1.9498
T31G	SNV	chr3:49933807	62.83	8.096	19.124	5.819	1.9001	2.2304
T31C	SNV	chr3:49933807	65.597	6.8316	18.672	4.7773	2.1141	2.0076
T31A	SNV	chr3:49933807	63.341	6.8971	20.855	4.5549	2.4579	1.8946
G32T	SNV	chr3:49933806	59.439	6.5053	24.239	4.7999	2.7634	2.2532
G32C	SNV	chr3:49933806	47.425	13.102	32.69	3.66	1.7845	1.3387
G32A	SNV	chr3:49933806	58.882	7.965	22.971	4.8088	2.8163	2.5567
C33T	SNV	chr3:49933805	65.684	7.3696	17.759	4.904	2.17	2.113
C33G	SNV	chr3:49933805	62.397	11.144	18.526	4.3948	1.7685	1.7699
C33A	SNV	chr3:49933805	69.447	7.0322	15.229	3.9184	3.1037	1.2699
C34T	SNV	chr3:49933804	58.09	6.9612	25.57	4.5444	2.7107	2.1244
C34A	SNV	chr3:49933804	63.638	6.2541	20.311	5.1982	1.976	2.6233
G35T	SNV	chr3:49933803	62.317	6.4039	22.086	5.4732	1.7162	2.0044
G35A	SNV	chr3:49933803	63.777	6.3949	20.563	4.9161	2.3891	1.9605
C36T	SNV	chr3:49933802	67.007	6.3651	16.602	5.0177	2.4087	2.5991
C36G	SNV	chr3:49933802	64.841	7.2941	17.117	6.4872	2.5672	1.6927
C36A	SNV	chr3:49933802	67.523	6.9075	14.626	6.5328	2.0425	2.3678
C37T	SNV	chr3:49933801	61.641	8.2294	20.37	5.3961	1.9866	2.377
C37A	SNV	chr3:49933801	60.537	6.0214	23.19	6.6653	1.2735	2.3128
CT38C	DEL	chr3:49933801	59.823	6.8847	22.927	6.9667	1.997	1.4014
T38G	SNV	chr3:49933800	64.306	7.1235	19.118	4.911	2.0436	2.4985
T38C	SNV	chr3:49933800	62.692	7.0399	20.687	5.7975	1.6383	2.1453
T38A	SNV	chr3:49933800	67.252	6.7127	16.362	5.1438	2.5097	2.0195
T39C	SNV	chr3:49933799	62.515	7.2197	20.805	5.1135	2.0278	2.3194
T39A	SNV	chr3:49933799	61.087	8.7382	20.019	5.4772	2.2374	2.4411
TC40T	DEL	chr3:49933799	61.734	7.0443	21.746	6.5592	1.3106	1.6063
C40T	SNV	chr3:49933798	53.36	9.0282	26.281	6.3299	1.6839	3.3172
C40A	SNV	chr3:49933798	44.716	16.002	30.488	4.1752	2.5434	2.0765
C41T	SNV	chr3:49933797	63.452	6.9636	19.796	4.8636	2.0786	2.846
C41G	SNV	chr3:49933797	64.311	7.8683	19.48	3.9545	2.1379	2.2475
C41A	SNV	chr3:49933797	64.325	6.1591	19.515	5.8205	2.071	2.1098
T42G	SNV	chr3:49933796	61.089	8.0894	20.168	4.7035	3.4745	2.4751
T42C	SNV	chr3:49933796	66.409	5.72	18.919	5.0553	1.6028	2.2934
T42A	SNV	chr3:49933796	67.357	6.2566	16.777	6.2617	1.4974	1.8504
G43T	SNV	chr3:49933795	59.889	5.6862	27.374	3.6619	1.6109	1.7783
G43C	SNV	chr3:49933795	61.122	7.0606	22.292	5.2343	1.7514	2.5394
G43A	SNV	chr3:49933795	60.773	6.0224	22.519	7.1282	2.5013	1.0561
A44T	SNV	chr3:49933794	55.325	7.2852	25.867	7.5754	2.0055	1.9414
A44G	SNV	chr3:49933794	62.361	6.8892	20.831	5.2934	2.525	2.1008
A44C	SNV	chr3:49933794	45.543	13.046	21.099	11.931	4.1705	4.2107
A45T	SNV	chr3:49933793	63.533	5.533	19.732	6.6767	2.4816	2.0441
A45G	SNV	chr3:49933793	65.862	5.1671	20.042	5.2921	1.9207	1.7161
T46G	SNV	chr3:49933792	66.445	8.7692	16.265	3.698	2.4851	2.3376
T46C	SNV	chr3:49933792	65.398	7.9299	18.134	4.8338	2.2667	1.4374
T46A	SNV	chr3:49933792	65.543	4.4724	18.552	6.1701	2.431	2.8315
A47T	SNV	chr3:49933791	61.296	9.0542	19.51	6.3313	2.2902	1.5179
A47G	SNV	chr3:49933791	62.923	8.3716	18.774	5.6759	2.2792	1.9754
T48G	SNV	chr3:49933790	69.706	0.85408	11.954	14.316	2.6987	0.47057
T48C	SNV	chr3:49933790	62.956	8.4485	18.693	5.7337	1.9216	2.2467
T48A	SNV	chr3:49933790	56.166	7.4306	24.888	6.9321	2.1472	2.4365
G49C	SNV	chr3:49933789	78.176	3.544	9.5108	4.8725	2.5428	1.3542
G49A	SNV	chr3:49933789	70.158	6.638	14.819	4.6957	1.7303	1.9593
T50G	SNV	chr3:49933788	64.82	5.3921	19.324	5.9756	2.4918	1.9971
T50C	SNV	chr3:49933788	63.605	7.3801	18.554	6.0965	2.3032	2.062
T50A	SNV	chr3:49933788	68.256	6.4316	15.72	6.0835	1.7705	1.7379
TG51T	DEL	chr3:49933788	54.3	6.1953	28.304	6.77	2.6842	1.7461
G51T	SNV	chr3:49933787	64.911	4.0746	22.137	4.037	2.7535	2.0872
G51A	SNV	chr3:49933787	65.975	5.2972	19.594	5.2799	1.9017	1.9519
G52T	SNV	chr3:49933786	64.417	5.9035	21.549	4.3429	2.0352	1.7527
G52C	SNV	chr3:49933786	65.343	6.0436	18.772	5.8201	2.3017	1.719
G52A	SNV	chr3:49933786	63.269	9.1963	17.524	5.4844	2.1601	2.3657
T53G	SNV	chr3:49933785	57.711	6.489	24.796	7.3885	1.283	2.3323
T53C	SNV	chr3:49933785	61.787	7.3275	19.999	6.2471	2.3173	2.3223
T53A	SNV	chr3:49933785	70.604	6.8538	14.482	4.0256	2.3627	1.6716
C54T	SNV	chr3:49933784	64.796	5.7828	19.363	5.7536	2.1871	2.1172
C54G	SNV	chr3:49933784	50.113	7.9848	27.531	3.2712	1.2874	9.8128
C54A	SNV	chr3:49933784	62.338	5.7834	19.836	8.5953	1.6822	1.7647
C55T	SNV	chr3:49933783	63.07	5.9302	19.577	7.0359	2.4224	1.9639
C55G	SNV	chr3:49933783	64.327	4.2571	17.068	10.045	3.0603	1.2422
C55A	SNV	chr3:49933783	60.795	5.9128	23.203	6.2471	2.2117	1.631
G56T	SNV	chr3:49933782	61.285	11.418	20.376	4.6602	0.67215	1.5891
G56C	SNV	chr3:49933782	61.071	4.9983	21.644	8.0961	2.0618	2.1287
G56A	SNV	chr3:49933782	66.265	6.626	19.004	4.2032	2.0121	1.8892
GA57G	DEL	chr3:49933782	67.163	9.8598	12.972	7.381	1.6317	0.99195
A57T	SNV	chr3:49933781	67.827	6.0153	15.953	6.7319	1.6801	1.7921
A57G	SNV	chr3:49933781	68.615	3.5977	17.953	5.9947	1.3877	2.4516
G58T	SNV	chr3:49933780	57.794	10.92	20.015	8.0003	0.71485	2.5553
G58A	SNV	chr3:49933780	60.458	8.218	20.678	6.8207	2.1174	1.7085
A59T	SNV	chr3:49933779	61.747	8.0177	23.312	4.1062	1.2468	1.5697
A59G	SNV	chr3:49933779	61.697	8.3584	20.719	4.4853	2.561	2.1788
AC60A	DEL	chr3:49933779	57.684	8.9293	22.647	6.5134	2.2482	1.9786
C60T	SNV	chr3:49933778	71.776	4.4024	15.142	3.8074	3.0849	1.7868
C60A	SNV	chr3:49933778	58.114	6.6148	25.386	6.1026	1.8251	1.9571
C61T	SNV	chr3:49933777	65.325	6.2242	17.948	5.0219	2.5044	2.9764
C61G	SNV	chr3:49933777	80.022	1.6004	11.778	2.3043	3.4334	0.86188
C61A	SNV	chr3:49933777	62.097	8.6802	16.291	6.9228	3.9537	2.0559
C62T	SNV	chr3:49933776	67.988	7.6743	15.205	4.7711	2.151	2.2112
C62A	SNV	chr3:49933776	65.2	5.7095	19.733	4.3274	2.6161	2.4142
C63T	SNV	chr3:49933775	64.818	7.4374	18.696	5.4807	1.9378	1.6301
C63G	SNV	chr3:49933775	50.934	10.659	17.983	9.4568	3.0749	7.8922
C63CT	IN	chr3:49933775	62.16	5.6384	21.255	7.0054	2.1327	1.809
C64T	SNV	chr3:49933774	65.571	8.3013	17.263	5.3582	1.9218	1.585
C64A	SNV	chr3:49933774	60.563	4.5525	24.036	6.6809	1.7313	2.4365
C64CA	IN	chr3:49933774	64.378	7.9245	17.683	6.687	1.6293	1.6979
CA65C	DEL	chr3:49933774	64.859	4.5394	17.001	7.4943	2.1668	3.9391
A65T	SNV	chr3:49933773	65.721	7.4557	18.215	4.4393	1.9116	2.2566
A65G	SNV	chr3:49933773	64.524	6.1241	18.401	7.0185	2.2192	1.7135
A65C	SNV	chr3:49933773	66.43	5.826	18.05	5.6962	2.4186	1.5797
AG66A	DEL	chr3:49933773	60.293	6.0104	20.962	7.269	3.1396	2.3257
G66T	SNV	chr3:49933772	68.998	6.8313	16.506	4.0903	1.8354	1.7394
G66A	SNV	chr3:49933772	65.461	7.8344	17.111	4.6512	2.5455	2.3964
G67T	SNV	chr3:49933771	67.089	8.2538	15.296	4.5136	2.4831	2.3648
G67C	SNV	chr3:49933771	61.062	18.805	10.388	3.7194	2.0376	3.9878
G67A	SNV	chr3:49933771	69.489	7.5022	14.55	3.8958	2.3213	2.2419
G68C	SNV	chr3:49933770	45.605	23.482	19.535	2.4946	2.6739	6.2102
G68A	SNV	chr3:49933770	71.261	6.6495	12.824	3.7313	2.6788	2.8561
A69T	SNV	chr3:49933769	66.329	4.4965	19.154	6.3225	2.2265	1.4719
A69G	SNV	chr3:49933769	63.259	5.3444	22.652	4.9142	1.9228	1.9074
A69C	SNV	chr3:49933769	66.453	3.6527	14.789	6.4134	7.5597	1.1331
A69AT	IN	chr3:49933769	60.457	5.6993	20.422	9.1048	2.3044	2.0125
T70G	SNV	chr3:49933768	77.171	3.7212	13.482	1.5497	2.5124	1.5637
T70C	SNV	chr3:49933768	67.656	5.9888	17.867	4.7161	1.6832	2.0879
T70A	SNV	chr3:49933768	68.383	3.9935	18.741	5.6326	1.3177	1.9318
TG71T	DEL	chr3:49933768	68.212	5.788	17.289	3.7931	2.5961	2.3224
G71C	SNV	chr3:49933767	75.633	12.125	8.6013	1.6696	1.2312	0.73955
G71A	SNV	chr3:49933767	61.484	6.9858	22.145	5.8803	1.9644	1.5406
G72T	SNV	chr3:49933766	65.776	7.2681	17.528	4.5954	2.6764	2.1565
G72C	SNV	chr3:49933766	69.827	5.8136	15.902	4.3182	2.1962	1.9427
G72A	SNV	chr3:49933766	65.179	7.5989	18.198	4.1812	2.51	2.3325
G73T	SNV	chr3:49933765	68.677	8.6129	14.203	5.3151	1.2008	1.9906
G73C	SNV	chr3:49933765	74.254	4.7904	12.112	4.8596	3.1495	0.83469
G73A	SNV	chr3:49933765	69.905	7.7232	13.523	3.989	2.3387	2.5212
T74G	SNV	chr3:49933764	59.451	13.3	17.371	6.0764	0.75811	3.0431
T74C	SNV	chr3:49933764	65.507	7.7628	17.586	4.1624	2.8532	2.1289
T74A	SNV	chr3:49933764	62.394	6.9761	21.022	5.1526	2.2214	2.2338
T74TG	IN	chr3:49933764	63.73	8.231	14.018	9.8403	2.9332	1.2473
G75T	SNV	chr3:49933763	67.789	5.1814	17.456	5.3141	2.1173	2.1422
G75A	SNV	chr3:49933763	66.829	6.6224	17.409	4.5965	2.1881	2.3554
G76T	SNV	chr3:49933762	63.569	6.8872	20.307	4.2372	2.4244	2.5752
G76C	SNV	chr3:49933762	65.03	7.0402	18.465	4.049	2.6819	2.7342
G76A	SNV	chr3:49933762	66.086	6.5975	17.448	5.2668	2.2097	2.3923
C77T	SNV	chr3:49933761	62.398	6.0399	20.599	6.4813	2.5045	1.9773
C77G	SNV	chr3:49933761	47.982	2.1558	24.82	18.458	4.1115	2.4722
C77A	SNV	chr3:49933761	69.088	5.062	17.637	4.9586	1.5722	1.6821
CA78C	DEL	chr3:49933761	61.183	7.6822	21.901	6.3301	1.7459	1.1581
A78T	SNV	chr3:49933760	66.483	6.3478	18.451	4.9257	2.0284	1.7647
A78G	SNV	chr3:49933760	63.815	6.9268	19.474	5.6401	1.8829	2.2612
A78C	SNV	chr3:49933760	59.068	9.2658	19.401	6.5229	3.5853	2.1573
AG79A	DEL	chr3:49933760	68.751	6.2895	15.594	4.1908	2.7143	2.4602
G79T	SNV	chr3:49933759	67.54	7.8196	15.862	4.073	2.4739	2.2315
G79C	SNV	chr3:49933759	60.277	7.8671	23.051	5.6172	1.1606	2.0271
G79A	SNV	chr3:49933759	67.88	7.2334	15.941	3.9751	2.8516	2.1195
G80T	SNV	chr3:49933758	69.408	7.5497	14.005	3.7527	3.2615	2.0224
G80C	SNV	chr3:49933758	66.194	10.015	15.423	3.5687	2.8202	1.9782
G80A	SNV	chr3:49933758	70.112	7.1001	14.736	3.8599	2.1108	2.0815
G81T	SNV	chr3:49933757	62.851	2.7832	23.774	7.2857	2.1462	1.16
G81A	SNV	chr3:49933757	69.356	7.5018	15.195	3.797	2.3658	1.7847
A82T	SNV	chr3:49933756	63.305	6.8138	20.126	5.7832	1.9948	1.9772
A82G	SNV	chr3:49933756	63.014	7.8512	18.849	5.0127	2.7844	2.489
A82C	SNV	chr3:49933756	64.306	7.6615	18.017	5.2479	2.654	2.1132
A83T	SNV	chr3:49933755	64.381	6.928	18.935	5.9948	1.9445	1.8168
A83G	SNV	chr3:49933755	62.224	7.5931	20.106	5.8847	2.1278	2.0636
T84G	SNV	chr3:49933754	78.19	3.0082	9.9139	2.0979	3.5359	3.2541
T84C	SNV	chr3:49933754	65.318	6.5795	18.045	5.605	2.1488	2.3047
T84A	SNV	chr3:49933754	63.857	6.9264	19.178	4.6538	3.1797	2.2047
C85T	SNV	chr3:49933753	62.122	8.3578	22.324	4.2705	1.5679	1.3583
C85A	SNV	chr3:49933753	61.173	6.295	21.486	6.5436	2.5865	1.9161
T86G	SNV	chr3:49933752	54.164	8.2767	18.356	15.601	1.7588	1.8435
T86C	SNV	chr3:49933752	60.866	8.3346	21.005	5.3079	2.3886	2.098
T86A	SNV	chr3:49933752	57.228	8.1516	23.847	7.5977	1.6129	1.5628
G87T	SNV	chr3:49933751	53.07	10.059	23.3	8.5054	3.1438	1.9217
G87A	SNV	chr3:49933751	64.6	6.4847	19.391	5.1281	2.3109	2.0851
A88T	SNV	chr3:49933750	57.439	8.7269	22.246	7.3617	2.3719	1.8542
A88G	SNV	chr3:49933750	61.866	7.3074	20.621	5.2733	2.111	2.8216
A88C	SNV	chr3:49933750	68.051	9.0529	7.6754	12.64	0.5969	1.9842
G89T	SNV	chr3:49933749	64.519	8.5137	16.509	7.12	1.6145	1.7243
G89A	SNV	chr3:49933749	65.947	5.0773	20.022	4.8912	2.1339	1.9291
T90G	SNV	chr3:49933748	58.592	7.0048	22.176	8.1734	2.1808	1.8733
T90C	SNV	chr3:49933748	66.266	7.6673	16.215	4.8738	2.6426	2.3346
T90A	SNV	chr3:49933748	66.648	7.2237	16.593	5.6962	1.7857	2.0529
G91T	SNV	chr3:49933747	58.624	13.554	12.789	3.3096	9.4131	2.3101
G91C	SNV	chr3:49933747	68.11	5.9089	16.368	5.9801	1.8688	1.7643
G91A	SNV	chr3:49933747	62.982	6.573	20.572	5.1979	2.2346	2.44
GC92G	DEL	chr3:49933747	64.467	7.4328	17.7	5.4674	3.4035	1.529
C92T	SNV	chr3:49933746	65.095	5.6672	19.46	5.8956	1.9149	1.9668
C92A	SNV	chr3:49933746	69.736	6.4575	15.797	4.0005	2.5484	1.4608
C93T	SNV	chr3:49933745	60.73	7.5603	20.478	6.8747	2.3593	1.9982
C93A	SNV	chr3:49933745	63.02	7.1431	19.864	6.4567	0.95101	2.5652
C94T	SNV	chr3:49933744	62.178	7.956	18.43	7.2489	2.4234	1.7633
C94G	SNV	chr3:49933744	66.421	8.0603	17.049	4.498	2.2536	1.7187
C94A	SNV	chr3:49933744	70.617	5.1083	13.98	5.7741	2.1214	2.3999
G95T	SNV	chr3:49933743	66.66	5.7722	19.008	4.6289	1.4563	2.4745
G95C	SNV	chr3:49933743	75.814	7.4845	10.548	1.7443	1.498	2.911
G95A	SNV	chr3:49933743	63.615	5.9523	20.585	5.238	2.3879	2.2221
G95GA	IN	chr3:49933743	67.228	5.2201	18.484	4.6547	2.1817	2.2313
GA96G	DEL	chr3:49933743	63.486	5.8489	21.093	7.5254	0.80987	1.2369
A96T	SNV	chr3:49933742	63.427	7.2073	21.029	4.8991	1.5358	1.9018
A96G	SNV	chr3:49933742	61.823	7.021	20.127	7.1056	1.7869	2.136
A96C	SNV	chr3:49933742	65.683	5.1649	19.38	4.0816	3.0111	2.6788
AG97A	DEL	chr3:49933742	64.47	5.3255	17.205	7.6015	3.8858	1.5123
G97T	SNV	chr3:49933741	67.543	7.4636	15.798	4.3459	2.5957	2.2533
G97C	SNV	chr3:49933741	66.388	8.6028	17.011	3.9219	1.8499	2.2266
G97A	SNV	chr3:49933741	66.297	6.4038	17.678	5.3959	2.3551	1.8696
G98T	SNV	chr3:49933740	68.086	8.5641	14.256	3.8472	2.2907	2.956
G98C	SNV	chr3:49933740	76.448	3.4255	8.2545	7.9345	1.7654	2.1725
G98A	SNV	chr3:49933740	67.412	6.302	16.239	5.1296	1.9792	2.9389
G99T	SNV	chr3:49933739	64.484	6.8867	17.376	6.0948	2.4356	2.7224
G99C	SNV	chr3:49933739	65.88	6.3178	17.695	5.6282	1.4929	2.9865
G99A	SNV	chr3:49933739	70.222	6.5208	14.168	4.5008	2.7976	1.7906
G100T	SNV	chr3:49933738	61.799	6.8829	20.847	6.6802	1.946	1.8454
G100C	SNV	chr3:49933738	60.109	8.7284	21.081	5.4951	2.2476	2.3392
G100A	SNV	chr3:49933738	68.634	6.7948	15.296	5.4357	1.8057	2.0339
A101T	SNV	chr3:49933737	66.056	7.632	16.505	6.4872	1.712	1.6079
A101G	SNV	chr3:49933737	66.233	6.132	18.636	5.0294	1.9654	2.0051
T102C	SNV	chr3:49933736	61.773	7.3262	21.7	5.512	1.8511	1.8373
T102A	SNV	chr3:49933736	61.464	6.4017	19.552	9.292	2.0116	1.2782
TG103T	DEL	chr3:49933736	71.409	4.939	12.615	6.4278	2.536	2.0733
G103T	SNV	chr3:49933735	63.103	5.747	22.396	3.8521	3.2199	1.6817
G103A	SNV	chr3:49933735	62.413	4.2926	23.522	6.3998	1.8477	1.5249
G104A	SNV	chr3:49933734	65.324	6.5717	18.958	5.3969	1.6827	2.0666
GA105G	DEL	chr3:49933734	69.418	4.6062	19.921	3.7903	0.90933	1.3551
A105T	SNV	chr3:49933733	65.241	6.1266	19.093	5.1394	2.2752	2.1238
A105G	SNV	chr3:49933733	63.176	6.3588	20.414	6.2903	2.0776	1.6838
A105C	SNV	chr3:49933733	60.26	6.6267	22.798	4.2897	2.2201	3.8055
G106T	SNV	chr3:49933732	67.098	6.7751	15.012	7.3525	1.9395	1.8227
G106C	SNV	chr3:49933732	67.565	10.568	11.351	6.9901	1.5036	2.0224
G106A	SNV	chr3:49933732	65.44	6.3512	19.435	4.6877	2.4378	1.6486
C107T	SNV	chr3:49933731	61.336	7.6394	21.686	4.8525	2.3794	2.1069
C107G	SNV	chr3:49933731	64.843	9.8561	14.892	7.0305	1.671	1.7073
C107A	SNV	chr3:49933731	63.563	7.1787	18.491	6.1657	2.6124	1.9897
T108G	SNV	chr3:49933730	67.257	5.6038	18.667	4.7407	2.0146	1.7168
T108C	SNV	chr3:49933730	66.776	6.1786	17.616	5.6617	2.0512	1.7167
T108A	SNV	chr3:49933730	64.807	6.4063	19.386	5.4512	2.076	1.8735
G109T	SNV	chr3:49933729	59.595	8.2109	24.063	4.3967	2.2325	1.5022
G109C	SNV	chr3:49933729	66.657	6.5137	16.383	5.5842	2.3085	2.554
G109A	SNV	chr3:49933729	64.867	6.7202	19.188	5.3236	2.1056	1.7954
C110T	SNV	chr3:49933728	73.866	4.0418	14.863	3.6834	2.0296	1.5168
C110A	SNV	chr3:49933728	64.262	5.0638	19.991	5.8831	2.8642	1.9357
T111G	SNV	chr3:49933727	66.978	7.7481	16.33	5.1714	1.9567	1.8158
T111C	SNV	chr3:49933727	67.399	6.4558	19.256	3.6501	1.4833	1.7559
T111A	SNV	chr3:49933727	65.23	6.6578	18.524	5.6638	2.3284	1.5954
TG112T	DEL	chr3:49933727	64.866	7.4864	16.153	7.0585	1.7008	2.7349
G112T	SNV	chr3:49933726	63.202	6.6813	20.717	5.3415	1.7223	2.3359
G112C	SNV	chr3:49933726	76.646	5.0056	9.7406	1.9047	1.2222	5.4804
G112A	SNV	chr3:49933726	67.147	7.1263	16.804	5.0352	1.8736	2.0138
G113T	SNV	chr3:49933725	66.205	9.2786	15.796	5.6893	1.8203	1.211
G113C	SNV	chr3:49933725	69.777	6.8236	14.043	4.9233	2.2887	2.1449
G113A	SNV	chr3:49933725	67.269	6.6142	16.509	4.9608	2.4868	2.1597
C114T	SNV	chr3:49933724	67.346	6.7849	15.924	4.859	2.1698	2.9162
C114G	SNV	chr3:49933724	66.792	8.3151	15.105	5.3623	2.8842	1.5409
C114A	SNV	chr3:49933724	73.47	6.1922	10.909	3.8209	3.1726	2.4353
CT115C	DEL	chr3:49933724	68.563	5.0886	17.607	4.5235	2.4598	1.7586
T115G	SNV	chr3:49933723	66.529	10.478	16.329	2.4256	2.4265	1.8119
T115C	SNV	chr3:49933723	71.789	6.0557	13.614	4.837	1.6142	2.0906
T115A	SNV	chr3:49933723	64.866	6.6003	19.052	5.2672	2.1802	2.0339
T116C	SNV	chr3:49933722	67.056	5.6129	17.384	5.3182	2.6338	1.9951
T116A	SNV	chr3:49933722	68.991	5.7059	16.219	4.8548	2.288	1.9411
T117C	SNV	chr3:49933721	67.608	7.7602	15.935	4.1532	2.3987	2.1454
T117A	SNV	chr3:49933721	61.516	7.1875	21.459	5.5571	2.0508	2.23
TA118T	DEL	chr3:49933721	69.231	4.3741	17.432	6.084	2.0711	0.8075
A118T	SNV	chr3:49933720	63.826	6.6843	17.507	7.7539	2.3151	1.9138
A118G	SNV	chr3:49933720	67.396	6.1371	16.658	5.2667	2.4156	2.1266
A118C	SNV	chr3:49933720	62.298	5.6614	18.532	8.7359	2.656	2.1174
C119T	SNV	chr3:49933719	63.939	7.3806	20.673	4.0427	1.8764	2.0878
C119G	SNV	chr3:49933719	61.417	9.495	19.739	5.411	1.927	2.0106
C119A	SNV	chr3:49933719	58.066	4.2459	18.577	10.184	7.6861	1.24
A120T	SNV	chr3:49933718	64.213	5.9803	21.222	4.7441	1.8816	1.9589
A120G	SNV	chr3:49933718	64.071	6.4654	19.707	5.5004	1.9218	2.3347
A120C	SNV	chr3:49933718	69.379	5.6732	15.291	5.7047	2.4665	1.4853
C121T	SNV	chr3:49933717	61.958	6.769	21.527	5.6765	2.0055	2.0648
C121G	SNV	chr3:49933717	60.411	7.7589	18.787	7.0555	3.0655	2.922
C121A	SNV	chr3:49933717	58.894	6.3434	22.661	8.4012	2.1866	1.5132
T122G	SNV	chr3:49933716	70.484	5.6318	13.57	7.2311	1.228	1.8549
T122C	SNV	chr3:49933716	66.618	7.3303	16.898	4.6797	2.1155	2.3586
T122A	SNV	chr3:49933716	65.604	6.519	18.915	4.6785	2.2194	2.0642
G123T	SNV	chr3:49933715	68.69	6.5827	16.196	4.0902	2.1234	2.3178
G123C	SNV	chr3:49933715	68.773	4.4589	17.622	5.6071	1.723	1.8159
G123A	SNV	chr3:49933715	64.616	5.5437	19.872	5.348	2.8284	1.7913
C124T	SNV	chr3:49933714	68.97	5.0693	15.779	6.1229	2.0917	1.9667
C124G	SNV	chr3:49933714	57.621	4.2567	25.941	7.6299	1.8923	2.6587
C124A	SNV	chr3:49933714	66.261	6.263	18.296	4.3996	3.2602	1.5202
C125T	SNV	chr3:49933713	61.111	7.4753	20.509	6.4356	2.2409	2.2283
C125A	SNV	chr3:49933713	65.613	6.3911	17.757	5.4651	2.437	2.3368
T126G	SNV	chr3:49933712	68.046	3.3618	16.483	6.7434	3.2689	2.0972
T126C	SNV	chr3:49933712	62.99	7.2367	19.216	6.1015	2.3296	2.1263
T126A	SNV	chr3:49933712	62.019	6.0024	20.865	7.5036	1.5483	2.062
G127T	SNV	chr3:49933711	55.309	6.9313	25.264	6.6278	3.5465	2.3217
G127A	SNV	chr3:49933711	65.836	7.1578	16.351	5.2548	3.2503	2.1498
G128T	SNV	chr3:49933710	70.332	3.8026	16.223	4.6596	2.833	2.1498
G128C	SNV	chr3:49933710	62.744	6.5352	19.386	6.1228	2.4854	2.7266
G128A	SNV	chr3:49933710	69.49	5.4249	16.012	4.8379	2.1263	2.1081
C129T	SNV	chr3:49933709	68.814	5.3583	16.673	5.2312	1.8644	2.0585
C129G	SNV	chr3:49933709	63.259	11.82	14.751	7.6811	1.124	1.3644
C129A	SNV	chr3:49933709	62.01	8.8744	19.043	6.0731	1.8819	2.1177
CT130C	DEL	chr3:49933709	75.032	4.5724	12.208	4.9904	2.1844	1.0128
T130G	SNV	chr3:49933708	64.568	8.3585	18.056	4.9979	1.9961	2.0228
T130C	SNV	chr3:49933708	65.194	9.9313	16.17	4.7927	1.8529	2.0587
T130A	SNV	chr3:49933708	61.383	6.4633	21.849	5.5967	1.9928	2.7155
T131G	SNV	chr3:49933707	56.512	6.3644	21.38	10.293	2.845	2.6054
T131C	SNV	chr3:49933707	61.97	6.9766	20.666	6.2478	2.3654	1.7746
T131A	SNV	chr3:49933707	63.591	8.1515	18.453	5.678	2.6038	1.5228
T132G	SNV	chr3:49933706	66.395	5.9437	16.324	9.0771	0.91369	1.3458
T132C	SNV	chr3:49933706	65.669	5.3629	19.204	5.9051	1.8462	2.0121
T132A	SNV	chr3:49933706	61.926	6.3925	19.189	7.614	2.8828	1.9959
TC133T	DEL	chr3:49933706	51.48	5.9946	24.728	13.658	1.5829	2.5562
C133T	SNV	chr3:49933705	64.636	7.1816	19.006	5.5109	2.009	1.6569
C133G	SNV	chr3:49933705	75.854	9.957	10.597	2.0127	0.83711	0.74193
C133A	SNV	chr3:49933705	67.91	7.5643	14.471	6.5564	1.319	2.1794
G134T	SNV	chr3:49933704	73.972	4.8967	13.236	4.4159	1.9308	1.5487
G134C	SNV	chr3:49933704	68.439	6.2296	17.971	4.0876	1.7369	1.5361
G134A	SNV	chr3:49933704	61.71	7.2408	20.322	6.3457	2.3072	2.0741
C135T	SNV	chr3:49933703	60.429	6.824	22.247	5.9439	2.2252	2.3313
C135G	SNV	chr3:49933703	64.01	7.6537	15.627	7.8593	1.363	3.4873
C135A	SNV	chr3:49933703	78.661	2.8956	11.864	3.8933	1.4148	1.2712
T136C	SNV	chr3:49933702	64.571	6.932	17.756	6.3811	1.9702	2.3901
T136A	SNV	chr3:49933702	62.043	6.1667	21.793	5.7446	2.2033	2.0491
T137G	SNV	chr3:49933701	68.928	6.498	14.791	5.0344	2.2378	2.5106
T137C	SNV	chr3:49933701	65.41	6.341	18.694	5.7849	1.5746	2.1951
T137A	SNV	chr3:49933701	65.309	6.4432	17.902	5.7056	2.4411	2.199
TC138T	DEL	chr3:49933701	66.401	6.6609	18.477	4.2808	2.0413	2.1386
C138T	SNV	chr3:49933700	61.282	7.3694	21.357	5.1065	1.8959	2.9888
C139T	SNV	chr3:49933699	62.793	6.2222	19.558	6.9611	2.303	2.1626
C139A	SNV	chr3:49933699	64.748	6.5461	18.479	5.4097	2.1498	2.6673
T140G	SNV	chr3:49933698	57.758	9.0785	16.819	6.0089	4.4314	5.9035
T140C	SNV	chr3:49933698	63.938	6.6017	19.471	5.5089	2.1395	2.3414
T140A	SNV	chr3:49933698	65.588	7.4263	17.696	4.8328	2.1793	2.2776
A141T	SNV	chr3:49933697	63.912	6.077	19.895	5.3375	2.553	2.2255
A141G	SNV	chr3:49933697	70.187	6.7712	15.867	3.763	1.4892	1.9219
A141C	SNV	chr3:49933697	67.671	6.8616	18.617	4.3387	1.1286	1.3828
A141AC	IN	chr3:49933697	66.706	5.5353	19.131	4.9582	1.5578	2.1124
AC142A	DEL	chr3:49933697	69.666	6.4204	16.106	4.6656	1.3522	1.7898
C142T	SNV	chr3:49933696	64.619	6.6252	18.387	5.7891	2.342	2.237
C142G	SNV	chr3:49933696	66.158	7.4269	16.405	5.6964	1.8311	2.4817
C142A	SNV	chr3:49933696	59.632	9.6225	17.403	8.6205	2.6878	2.034
C143T	SNV	chr3:49933695	61.81	6.6172	22.745	4.3144	2.4707	2.0423
C143G	SNV	chr3:49933695	62.483	7.3423	21.079	4.8335	2.1482	2.1136
C143A	SNV	chr3:49933695	69.062	7.5902	15.068	3.7203	2.6877	1.8718
C144T	SNV	chr3:49933694	67.729	8.7362	15.437	3.531	1.3795	3.1873
C144G	SNV	chr3:49933694	67.108	6.8667	13.503	6.2676	3.3619	2.8932
C144A	SNV	chr3:49933694	71.339	6.894	12.757	4.8432	2.4461	1.7198
C145T	SNV	chr3:49933693	66.441	7.0441	17.907	4.3354	2.4073	1.8655
C145G	SNV	chr3:49933693	67.122	6.7089	18.366	4.0698	1.583	2.1504
C145A	SNV	chr3:49933693	61.298	6.7377	21.351	5.2518	2.9788	2.3832
C146T	SNV	chr3:49933692	66.137	6.6186	18.868	4.663	1.9861	1.727
C146A	SNV	chr3:49933692	68.504	4.0398	16.707	5.2134	2.313	3.2222
CA147C	DEL	chr3:49933692	57.195	10.217	24.333	4.1525	1.3056	2.7965
A147T	SNV	chr3:49933691	62.186	6.1016	19.593	7.3706	2.2444	2.5044
A147G	SNV	chr3:49933691	65.988	6.172	18.166	5.902	2.0779	1.6946
A147C	SNV	chr3:49933691	63.177	7.9113	16.994	7.3167	2.4368	2.1638
A147AC	IN	chr3:49933691	67.547	4.4814	17.894	7.5783	1.4047	1.095
AC148A	DEL	chr3:49933691	66.948	6.88	16.62	5.4361	2.12	1.9959
C148T	SNV	chr3:49933690	67.425	7.2511	16.589	4.9818	1.8976	1.8557
C148G	SNV	chr3:49933690	68.508	5.4387	19.044	3.524	0.99447	2.4908
C148A	SNV	chr3:49933690	42.925	11.073	35.593	3.2047	2.1565	5.0475
C149T	SNV	chr3:49933689	69.072	6.3346	15.919	5.2493	1.7329	1.6928
C149G	SNV	chr3:49933689	66.077	6.8534	17.133	5.9726	1.959	2.0049
C149A	SNV	chr3:49933689	61.529	7.5323	20.256	6.5887	2.1888	1.905
C150T	SNV	chr3:49933688	62.785	8.5736	18.721	4.8352	2.3824	2.7024
C150A	SNV	chr3:49933688	65.883	7.5063	17.169	4.9555	2.0295	2.4565
C151T	SNV	chr3:49933687	61.015	8.3613	20.309	5.8733	2.3382	2.1028
C151CT	IN	chr3:49933687	60.303	6.7733	16.73	11.808	2.7281	1.6573
A152T	SNV	chr3:49933686	67.067	7.2155	17.455	4.0302	2.0279	2.2045
A152G	SNV	chr3:49933686	64.024	7.7328	18.507	4.9738	2.4491	2.313
A152C	SNV	chr3:49933686	67.249	6.847	14.363	8.0625	1.5717	1.9068
AT153A	DEL	chr3:49933686	73.827	5.3821	12.816	4.7892	1.5869	1.5988
T153C	SNV	chr3:49933685	64.825	7.0308	19.122	4.6731	2.4397	1.9097
T153A	SNV	chr3:49933685	65.963	9.246	16.709	3.6893	2.0951	2.2982
C154T	SNV	chr3:49933684	64.828	5.9459	20.164	4.7421	1.9308	2.3893
C154G	SNV	chr3:49933684	59.652	8.5114	21.607	6.1706	2.0368	2.0219
C154A	SNV	chr3:49933684	62.345	5.6392	23.289	4.4326	2.5083	1.7861
C155T	SNV	chr3:49933683	64.373	5.8814	19.345	6.0623	2.6419	1.697
C155G	SNV	chr3:49933683	67.32	6.6498	17.406	4.5891	1.8572	2.1776
C155A	SNV	chr3:49933683	63.695	9.1512	18.004	4.6331	1.837	2.6797
CA156C	DEL	chr3:49933683	68.219	5.3633	15.217	6.6125	3.0598	1.5288
A156T	SNV	chr3:49933682	63.709	5.7294	20.071	6.6069	2.0389	1.8445
A156G	SNV	chr3:49933682	62.872	6.9366	19.547	5.496	2.3349	2.8126
A156C	SNV	chr3:49933682	68.439	6.3556	16.242	4.6176	1.9619	2.3845
AC157A	DEL	chr3:49933682	66.77	5.7623	18.403	4.7929	2.6258	1.6457
C157T	SNV	chr3:49933681	67.061	7.4298	16.345	5.3644	1.8702	1.9292
C157G	SNV	chr3:49933681	63.362	6.1346	19.526	5.9374	2.9731	2.0667
C157A	SNV	chr3:49933681	52.038	7.0497	21.082	13.136	4.3009	2.3933
C158T	SNV	chr3:49933680	65.364	6.6272	18.493	5.0826	2.4767	1.957
C158G	SNV	chr3:49933680	63.187	5.3057	22.376	5.1518	2.0345	1.9447
C158A	SNV	chr3:49933680	60.16	8.9497	20.044	5.8726	2.0212	2.9526
C159T	SNV	chr3:49933679	63.732	5.6932	20.742	5.6487	2.2295	1.9551
C159G	SNV	chr3:49933679	67.108	4.8835	17.07	4.9578	4.3136	1.6673
C159A	SNV	chr3:49933679	79.208	3.1374	10.995	3.2011	2.1425	1.3161
CA160C	DEL	chr3:49933679	68.007	8.0959	15.903	4.0968	2.2837	1.6139
A160T	SNV	chr3:49933678	65.792	7.1497	16.672	5.8054	2.2494	2.3319
A160G	SNV	chr3:49933678	65.802	9.93	15.425	4.33	2.3182	2.1949
A160C	SNV	chr3:49933678	64.708	6.7292	19.248	5.1788	2.9939	1.1425
G161T	SNV	chr3:49933677	64.959	7.4692	18.609	2.875	2.2126	3.8749
G161C	SNV	chr3:49933677	62.459	3.9685	17.077	12.377	2.0868	2.032
G161A	SNV	chr3:49933677	64.501	7.0658	18.444	5.3479	2.4509	2.1905
T162G	SNV	chr3:49933676	67.289	6.5088	18.017	3.5422	2.5929	2.0501
T162C	SNV	chr3:49933676	67.03	6.5764	16.566	5.7046	2.2424	1.8812
T162A	SNV	chr3:49933676	65.805	6.0103	17.344	6.2469	2.7119	1.8816
G163T	SNV	chr3:49933675	64.359	5.9228	20.397	5.3776	2.8556	1.0885
G163C	SNV	chr3:49933675	61.128	8.6802	20.971	4.6586	2.9097	1.653
G163A	SNV	chr3:49933675	65.605	6.056	18.607	5.4969	2.3137	1.9205
C164T	SNV	chr3:49933674	66.252	7.7722	17.739	4.6313	1.772	1.8337
C164G	SNV	chr3:49933674	67.481	3.8131	17.513	4.0968	4.6211	2.4752
C164A	SNV	chr3:49933674	65.4	9.1584	15.612	4.6166	2.6973	2.516
C165T	SNV	chr3:49933673	63.753	5.5281	20.393	6.0395	2.2692	2.0171
C165G	SNV	chr3:49933673	68.212	1.9756	21.079	3.2489	4.1074	1.3764
C165A	SNV	chr3:49933673	71.79	7.6515	13.157	2.7391	1.4459	3.2166
CA166C	DEL	chr3:49933673	81.265	4.7544	8.9359	3.8405	0.85912	0.34537
A166T	SNV	chr3:49933672	65.575	7.4587	17.462	5.0133	2.424	2.0673
A166G	SNV	chr3:49933672	66.644	7.1509	16.603	5.4256	1.8881	2.2883
A166C	SNV	chr3:49933672	50.732	23.417	11.965	7.3047	2.61	3.9719
A167T	SNV	chr3:49933671	65.014	7.5801	17.848	5.4967	2.1088	1.9525
A167G	SNV	chr3:49933671	58.683	7.8675	22.008	7.0037	2.0598	2.3778
AC168A	DEL	chr3:49933671	56.005	10.609	25.401	4.7519	1.8449	1.388
C168T	SNV	chr3:49933670	63.76	6.4331	18.074	7.8273	2.0829	1.8224
C168G	SNV	chr3:49933670	59.219	8.0571	17.897	8.0821	2.1333	4.6117
C169T	SNV	chr3:49933669	64.989	5.6442	19.528	5.5543	2.347	1.9385
C169G	SNV	chr3:49933669	59.207	10.657	19.533	6.021	2.418	2.1642
C169A	SNV	chr3:49933669	69.8	5.8365	14.296	5.1347	2.591	2.342
T170G	SNV	chr3:49933668	71.977	6.245	12.819	5.8233	1.8811	1.2551
T170C	SNV	chr3:49933668	63.847	7.7413	18.689	5.4303	2.1156	2.1766
T170A	SNV	chr3:49933668	62.862	6.1264	19.093	7.2888	2.7836	1.8465
A171T	SNV	chr3:49933667	65.829	7.7193	16.508	5.8976	1.6695	2.3767
A171G	SNV	chr3:49933667	65.363	9.3426	15.526	5.474	1.8543	2.4406
A171C	SNV	chr3:49933667	62.688	8.9332	17.131	5.6157	2.6907	2.9414
G172T	SNV	chr3:49933666	57.964	8.525	21.184	7.9181	2.5528	1.8556
G172A	SNV	chr3:49933666	65.351	8.0872	17.109	5.1374	2.3015	2.0138
GT173G	DEL	chr3:49933666	90.227	1.6309	5.6918	1.8342	0.21315	0.40327
T173G	SNV	chr3:49933665	62.257	7.0372	18.448	7.0675	3.2546	1.9353
T173C	SNV	chr3:49933665	65.577	6.2682	18.752	5.1389	2.2109	2.0535
T173A	SNV	chr3:49933665	63.242	6.5596	18.655	7.579	2.3681	1.5969
T174G	SNV	chr3:49933664	46.179	10.285	36.638	5.0723	1.0162	0.80901
T174C	SNV	chr3:49933664	61.818	6.5903	22.269	4.9856	2.413	1.9239
T174A	SNV	chr3:49933664	68.144	5.0623	16.524	6.0239	2.7324	1.5129
C175T	SNV	chr3:49933663	64.003	6.3483	20.537	5.2192	2.1879	1.7042
C175G	SNV	chr3:49933663	67.843	2.9701	20.58	6.0912	1.871	0.64445
C175A	SNV	chr3:49933663	65.058	0.97471	19.507	7.3033	2.2101	4.9475
C176T	SNV	chr3:49933662	63.653	6.9253	21.517	4.4642	1.9938	1.4477
C176A	SNV	chr3:49933662	58.424	8.089	23.079	6.5583	1.9101	1.94
A177T	SNV	chr3:49933661	56.831	5.174	27.332	6.9164	2.276	1.4703
A177G	SNV	chr3:49933661	60.765	6.7858	22.589	5.3478	2.7519	1.7601
A177C	SNV	chr3:49933661	58.411	5.9835	27.907	3.9507	1.4975	2.2505
C178T	SNV	chr3:49933660	68.803	5.9854	18.71	3.3438	1.9325	1.2254
C178A	SNV	chr3:49933660	64.394	6.7676	17.609	5.2025	3.4048	2.6224
T179G	SNV	chr3:49933659	66.05	7.234	16.679	4.4793	2.5847	2.9728
T179C	SNV	chr3:49933659	64.047	7.1031	18.294	6.0819	2.4316	2.0419
T179A	SNV	chr3:49933659	62.891	6.0422	22.339	4.56	2.4057	1.7617
G180T	SNV	chr3:49933658	55.746	5.1001	27.39	7.2666	2.6881	1.8084
G180A	SNV	chr3:49933658	56.294	5.0662	29.467	4.1824	2.7618	2.2285
A181T	SNV	chr3:49933657	57.752	5.6792	25.785	6.4229	2.058	2.303
A181G	SNV	chr3:49933657	63.023	7.3346	21.517	4.0885	2.5305	1.5065
A182T	SNV	chr3:49933656	70.596	7.4416	14.091	4.7435	1.5855	1.5424
A182G	SNV	chr3:49933656	64.632	4.2954	18.102	6.2491	2.5315	4.19
A182C	SNV	chr3:49933656	63.106	4.7803	26.117	2.1942	2.6958	1.1066
G183T	SNV	chr3:49933655	67.818	3.99	18.075	5.7289	2.5098	1.8787
G183C	SNV	chr3:49933655	61.145	2.2449	27.4	4.6098	3.4366	1.1636
G183A	SNV	chr3:49933655	62.455	5.9917	20.367	6.9958	2.2781	1.9125
C184T	SNV	chr3:49933654	56.252	7.4097	26.517	1.6257	4.024	4.1716
C184A	SNV	chr3:49933654	57.886	8.642	23.21	7.5252	1.517	1.22
T186G	SNV	chr3:49933652	60.827	1.2647	14.192	18.723	4.3677	0.62584
T186C	SNV	chr3:49933652	64.479	7.759	19.661	4.6805	1.6059	1.8149
T186A	SNV	chr3:49933652	63.138	5.8971	21.32	5.2917	2.489	1.8645
G187T	SNV	chr3:49933651	61.87	5.2909	25.493	2.5163	2.4697	2.36
G187A	SNV	chr3:49933651	68.977	7.1958	15.566	5.0758	1.2693	1.9158
A188T	SNV	chr3:49933650	63.807	5.8203	21.753	5.6865	1.3728	1.5607
A188G	SNV	chr3:49933650	62.857	5.5984	21.209	6.5837	1.8097	1.9414
A188C	SNV	chr3:49933650	64.83	7.6708	19.172	4.3044	2.3725	1.65
AG189A	DEL	chr3:49933650	62.757	6.6581	18.176	5.5148	2.6141	4.2804
G189T	SNV	chr3:49933649	62.273	5.4863	19.903	5.411	4.894	2.0318
G189C	SNV	chr3:49933649	64.742	5.6375	21.202	4.0345	2.5338	1.8501
G189A	SNV	chr3:49933649	66.403	6.7761	18.648	4.2516	1.9966	1.9242
G190T	SNV	chr3:49933648	65.445	3.6821	22.972	4.8731	1.422	1.6065
G190A	SNV	chr3:49933648	71.931	3.9438	13.335	7.1406	1.8833	1.7663
A191T	SNV	chr3:49933647	59.249	7.0224	24.586	5.3182	1.9136	1.9104
A191G	SNV	chr3:49933647	64.47	5.4186	21.707	5.6931	1.5875	1.1242
A191C	SNV	chr3:49933647	61.782	4.1277	23.628	6.1128	2.0226	2.3264
G192T	SNV	chr3:49933646	69.513	6.6711	14.977	5.7011	1.7638	1.3738
G192C	SNV	chr3:49933646	58.725	7.0918	22.454	6.8202	2.7469	2.1622
G192A	SNV	chr3:49933646	61.609	6.2328	21.567	6.2638	2.2565	2.0714
C193T	SNV	chr3:49933645	67.467	6.8459	16.716	4.9907	2.2154	1.7654
C193G	SNV	chr3:49933645	60.773	8.8943	22.206	4.1016	2.6015	1.4232
C193A	SNV	chr3:49933645	64.326	5.1126	19.157	7.1948	3.081	1.1283
A194T	SNV	chr3:49933644	62.535	5.26	20.698	7.7362	2.0142	1.7572
A194G	SNV	chr3:49933644	64.541	6.9028	19.402	5.1517	2.083	1.9195
T195G	SNV	chr3:49933643	65.453	6.0024	21.981	3.2414	2.0647	1.2567
T195C	SNV	chr3:49933643	62.148	7.6485	19.644	5.5807	2.7644	2.2137
T195A	SNV	chr3:49933643	65.926	6.9811	17.031	5.8827	2.4517	1.7274
G196T	SNV	chr3:49933642	66.577	6.6393	18.145	4.6992	1.8126	2.1269
G196C	SNV	chr3:49933642	64.761	6.2092	19.242	4.5766	3.2193	1.9919
G196A	SNV	chr3:49933642	65.996	5.9882	18.266	5.5406	2.0698	2.1394
C197T	SNV	chr3:49933641	65.485	7.3329	18.845	5.0117	1.9605	1.365
C197G	SNV	chr3:49933641	53.837	9.9611	19.462	8.7638	3.5752	4.4016
C197A	SNV	chr3:49933641	64.838	6.8678	18.195	5.1252	2.6469	2.3264
C198T	SNV	chr3:49933640	63.581	7.0598	20.936	4.8425	1.8984	1.6821
C198G	SNV	chr3:49933640	66.167	6.6022	12.298	12.195	0.7897	1.948
C198A	SNV	chr3:49933640	59.376	9.2349	21.171	5.539	2.7342	1.9451
A199T	SNV	chr3:49933639	64.265	5.9919	18.488	5.4426	3.4368	2.3754
A199G	SNV	chr3:49933639	64.15	6.0623	18.891	6.0814	2.4466	2.369
A199C	SNV	chr3:49933639	68.843	5.4111	18.255	4.1332	1.7715	1.5857
AT200A	DEL	chr3:49933639	59.364	15.134	14.876	5.8428	1.6562	3.1267
T200C	SNV	chr3:49933638	65.009	7.825	17.961	5.3492	1.8744	1.9815
T200A	SNV	chr3:49933638	63.863	8.3398	18.778	4.8657	2.4896	1.6644
T201G	SNV	chr3:49933637	67.409	10.372	14.866	3.0896	1.4746	2.7886
T201C	SNV	chr3:49933637	65.775	7.2813	16.849	6.0734	2.1604	1.8611
T201A	SNV	chr3:49933637	67.82	6.8156	16.236	5.4047	1.6088	2.1145
A202T	SNV	chr3:49933636	67.082	8.1465	17.372	3.1829	1.9445	2.272
A202G	SNV	chr3:49933636	62.039	8.5472	18.826	5.9951	2.345	2.2473
A202C	SNV	chr3:49933636	64.167	7.1411	19.913	4.3149	1.6794	2.785
A203T	SNV	chr3:49933635	66.287	7.3014	17.124	5.4238	1.7622	2.1018
A203G	SNV	chr3:49933635	61.304	6.2652	23.671	4.7153	2.218	1.8263
G204T	SNV	chr3:49933634	59.684	1.9573	24.08	4.2976	7.5772	2.404
G204C	SNV	chr3:49933634	68.892	5.887	14.399	7.0373	1.6235	2.1615
G204A	SNV	chr3:49933634	69.729	8.1974	13.217	4.8441	1.5742	2.4386
T205G	SNV	chr3:49933633	67.24	10.003	13.897	4.1671	1.1126	3.5805
T205C	SNV	chr3:49933633	69.04	5.6138	15.585	5.3885	2.0026	2.3702
T205A	SNV	chr3:49933633	61.412	8.269	19.353	5.1502	3.6077	2.2088
T206G	SNV	chr3:49933632	63.043	5.8338	21.59	6.3296	1.8004	1.4024
T206C	SNV	chr3:49933632	66.259	6.8879	17.161	5.3488	2.1981	2.1456
T206A	SNV	chr3:49933632	62.434	5.9124	20.112	7.0481	2.7744	1.7188
T207G	SNV	chr3:49933631	57.741	10.014	19.27	9.177	2.1004	1.697
T207C	SNV	chr3:49933631	67.991	6.8497	16.536	4.7998	1.9268	1.8973
T207A	SNV	chr3:49933631	67.697	6.1156	17.957	4.4414	2.3997	1.3894
G208T	SNV	chr3:49933630	62.469	6.2361	21.334	5.4043	1.4997	3.0562
G208A	SNV	chr3:49933630	68.696	7.0416	16.145	4.3252	2.0724	1.7195
A209T	SNV	chr3:49933629	62.909	7.5213	19.492	5.9431	1.7005	2.434
A209G	SNV	chr3:49933629	59.329	4.5906	26.029	6.1148	1.9163	2.0204
A209C	SNV	chr3:49933629	67.045	6.8939	16.587	4.8744	2.617	1.983
G210T	SNV	chr3:49933628	54.746	2.1541	34.57	5.2401	1.6613	1.6287
G210C	SNV	chr3:49933628	63.529	4.9475	21.643	4.9919	2.1789	2.7099
G210A	SNV	chr3:49933628	56.83	5.9646	26.874	6.254	1.4691	2.608
G211T	SNV	chr3:49933627	3.2747	0.40726	82.79	11.224	0.77398	1.5303
T212C	SNV	chr3:49933626	24.781	2.1494	57.858	11.862	0.58547	2.7638
T212A	SNV	chr3:49933626	3.1244	0.68782	78.857	15.542	0.88441	0.90468
A213T	SNV	chr3:49933625	45.152	2.6058	40.999	8.3756	1.6513	1.2161
A213G	SNV	chr3:49933625	59.504	7.6108	24.191	4.667	2.053	1.9745
A214T	SNV	chr3:49933624	62.651	4.1953	23.835	5.632	1.6134	2.0725
A214G	SNV	chr3:49933624	57.848	6.9003	27.402	4.2797	1.5391	2.0313
A214C	SNV	chr3:49933624	62.943	3.6961	26.621	4.8538	0.73033	1.1559
G215C	SNV	chr3:49933623	49.038	4.6501	37.015	4.676	1.9686	2.6524
G215A	SNV	chr3:49933623	53.447	2.8044	36.298	3.3471	2.0376	2.0668
T216G	SNV	chr3:49933622	51.683	2.7498	37.238	5.0992	1.5993	1.6299
T216C	SNV	chr3:49933622	63.853	4.9411	21.948	4.9115	1.7384	2.6085
T216A	SNV	chr3:49933622	61.031	7.2838	23.373	4.496	1.4747	2.3411
G217T	SNV	chr3:49933621	64.831	9.6084	17.647	4.1818	1.2729	2.4587
G217C	SNV	chr3:49933621	63.018	13.273	13.55	5.3251	1.6161	3.2166
G217A	SNV	chr3:49933621	68.661	4.0148	17.682	5.4528	2.2454	1.9434
GT218G	DEL	chr3:49933621	44.755	37.4	9.1946	7.036	0.75678	0.8576
T218G	SNV	chr3:49933620	69.55	3.8159	21.676	4.4129	0.013711	0.53105
T218C	SNV	chr3:49933620	62.612	5.2163	20.907	7.0866	2.3173	1.8607
T218A	SNV	chr3:49933620	64.579	6.9293	17.955	6.0172	2.7647	1.7549
TA219T	DEL	chr3:49933620	56.46	8.5532	26.79	3.2274	1.8697	3.0997
A219T	SNV	chr3:49933619	63.416	5.4992	21.702	4.631	2.4123	2.3395
A219G	SNV	chr3:49933619	68.194	5.4776	17.817	4.9599	1.8322	1.7202
A220T	SNV	chr3:49933618	63.175	11.956	16.514	3.6987	2.0689	2.5866
A220G	SNV	chr3:49933618	62.919	5.5408	19.69	7.5834	2.6093	1.657
A220C	SNV	chr3:49933618	70.204	4.6766	15.169	5.7925	2.707	1.451
AG221A	DEL	chr3:49933618	57.565	12.659	21.264	4.3799	1.4496	2.6832
G221T	SNV	chr3:49933617	62.217	6.8357	20.814	5.6112	2.4067	2.1158
G221A	SNV	chr3:49933617	58.048	6.2318	26.751	4.4974	2.4091	2.0625
G222T	SNV	chr3:49933616	60.449	5.732	25.184	5.9167	2.1745	0.54335
G222A	SNV	chr3:49933616	58.938	5.1676	25.546	6.1902	1.997	2.1607
G223T	SNV	chr3:49933615	71.3	6.0802	14.937	4.7277	1.0989	1.8565
G223A	SNV	chr3:49933615	59.873	7.0215	22.552	6.9316	1.7072	1.9144
A224T	SNV	chr3:49933614	62.105	8.3524	19.809	5.5457	2.1075	2.0798
A224G	SNV	chr3:49933614	62.745	9.0903	17.745	6.1967	1.9632	2.2598
T225C	SNV	chr3:49933613	64.565	7.7301	16.149	7.3848	2.1054	2.0653
T225A	SNV	chr3:49933613	57.249	4.188	20.358	12.586	1.9296	3.6895
TA226T	DEL	chr3:49933613	60.811	16.509	13.33	5.1185	2.6472	1.5851
A226T	SNV	chr3:49933612	63.882	8.3582	17.359	6.4572	1.7815	2.1621
A226G	SNV	chr3:49933612	67.213	8.25	14.926	4.8291	2.6983	2.0836
A226C	SNV	chr3:49933612	65.52	12.105	15.932	1.7774	1.8389	2.827
A226AT	IN	chr3:49933612	59.643	8.3551	23.592	5.8278	1.4616	1.1203
A226AG	IN	chr3:49933612	67.47	4.3625	18.877	5.3229	1.9508	2.017
AG227A	DEL	chr3:49933612	57.962	4.3995	31.358	2.2778	3.2478	0.75435
G227T	SNV	chr3:49933611	61.256	5.7055	20.269	7.8636	2.7291	2.1774
G227C	SNV	chr3:49933611	59.963	5.627	11.66	15.709	4.7043	2.3359
G227A	SNV	chr3:49933611	58.772	8.5467	21.981	6.4407	2.3326	1.9272
G228T	SNV	chr3:49933610	30.503	18.022	37.265	3.8955	2.7245	7.5896
G228A	SNV	chr3:49933610	49.537	12.801	27.655	6.2948	1.5833	2.1293
G228GT	IN	chr3:49933610	54.963	9.7102	26.077	6.5066	2.0153	0.72877
G229T	SNV	chr3:49933609	51.629	13.189	26.493	4.861	1.7519	2.0765
G229C	SNV	chr3:49933609	47.483	10.606	32.417	4.8296	3.9012	0.76316
G229A	SNV	chr3:49933609	51.122	12.505	26.604	5.2117	2.3407	2.2172
G230T	SNV	chr3:49933608	53.03	12.552	27.763	2.8715	1.2171	2.5664
G230C	SNV	chr3:49933608	55.628	13.448	20.153	6.7173	1.6442	2.4091
G230A	SNV	chr3:49933608	58.577	8.6475	24.098	4.9913	1.7693	1.9172
C231T	SNV	chr3:49933607	64.857	6.1234	19.383	5.6241	1.9982	2.0148
C231A	SNV	chr3:49933607	69.073	4.78	14.265	8.0372	1.8177	2.027
CA232C	DEL	chr3:49933607	71.164	6.5634	12.429	5.2481	2.4898	2.1056
A232T	SNV	chr3:49933606	66.193	6.7613	16.6	6.2144	1.7836	2.4477
A232G	SNV	chr3:49933606	67.724	4.9949	17.51	5.4619	2.4123	1.8966
A232C	SNV	chr3:49933606	61.229	10.852	17.001	4.513	2.9507	3.4545
AG233A	DEL	chr3:49933606	65.2	7.9612	19.406	4.0119	1.3348	2.0861
G233T	SNV	chr3:49933605	56.911	12.22	22.784	3.634	2.3497	2.1022
G233C	SNV	chr3:49933605	55.277	9.7744	25.013	5.1903	2.366	2.3796
G233A	SNV	chr3:49933605	57.383	15.113	19.189	4.3342	1.2262	2.7541
G234T	SNV	chr3:49933604	59.163	14.126	19.378	3.8733	1.0444	2.4157
G234C	SNV	chr3:49933604	76.434	5.1268	12.268	4.3374	0.94098	0.89237
G234A	SNV	chr3:49933604	54.265	17.465	19.234	4.9784	1.5675	2.4903
G235T	SNV	chr3:49933603	56.853	12.315	20.994	5.7954	0.75174	3.2907
G235A	SNV	chr3:49933603	58.166	11.302	22.714	3.6696	2.0327	2.1156
A236T	SNV	chr3:49933602	67.579	7.4889	16.909	4.3627	1.7981	1.862
A236G	SNV	chr3:49933602	66.449	7.8701	15.719	5.2827	2.3521	2.3279
A236C	SNV	chr3:49933602	56.335	7.3364	25.013	7.9375	1.9967	1.3808
C237T	SNV	chr3:49933601	65.803	7.1979	18.07	4.9594	1.8692	2.0999
C237G	SNV	chr3:49933601	63.514	7.3857	18.474	6.1146	2.7041	1.8076
A238T	SNV	chr3:49933600	64.712	7.4615	18.544	5.1532	2.0038	2.1262
A238G	SNV	chr3:49933600	67.334	6.1164	15.851	6.0869	2.3351	2.2772
A238C	SNV	chr3:49933600	66.688	5.2432	17.305	5.4431	2.8752	2.4461
G239T	SNV	chr3:49933599	67.795	5.6679	14.981	7.9612	2.529	1.0658
G239C	SNV	chr3:49933599	65.082	7.3417	17.683	5.3119	2.2853	2.2961
G239A	SNV	chr3:49933599	64.251	6.2182	18.924	5.82	2.6849	2.1016
T240C	SNV	chr3:49933598	65.132	7.3045	18.18	5.1011	2.1834	2.0989
T240A	SNV	chr3:49933598	64.038	6.8257	19.833	5.3408	1.8767	2.0859
T241G	SNV	chr3:49933597	72.504	6.6928	12.113	4.6152	1.9757	2.0994
T241C	SNV	chr3:49933597	68.149	5.3387	18.395	4.6268	1.6381	1.8522
T241A	SNV	chr3:49933597	58.862	10	21.274	4.7823	2.4819	2.5999
TG242T	DEL	chr3:49933597	68.11	6.6735	17.612	4.0591	1.847	1.6987
G242T	SNV	chr3:49933596	60.68	7.9313	21.134	6.4299	1.6449	2.1797
G242C	SNV	chr3:49933596	63.524	6.3096	20.632	5.3862	2.2991	1.849
G242A	SNV	chr3:49933596	61.991	4.8809	25.679	4.2419	1.4305	1.7767
G243T	SNV	chr3:49933595	65.531	3.3187	22.614	5.1586	1.8633	1.5142
G243A	SNV	chr3:49933595	61.742	5.1011	23.038	6.5176	1.289	2.3115
G244T	SNV	chr3:49933594	67.572	3.1651	18.853	6.3042	2.0968	2.009
G244A	SNV	chr3:49933594	64.052	4.1116	20.569	6.8615	2.2202	2.1857
G245T	SNV	chr3:49933593	66.822	6.5716	17.44	5.156	2.0627	1.948
G245C	SNV	chr3:49933593	55.014	4.8977	28.575	7.5897	1.3697	2.5546
G245A	SNV	chr3:49933593	62.362	7.7444	20.807	4.9103	2.2235	1.9522
GA246G	DEL	chr3:49933593	58.369	12.965	23.225	2.9615	0.62219	1.8575
A246T	SNV	chr3:49933592	64.434	7.3327	18.168	5.2393	2.5689	2.2571
A246G	SNV	chr3:49933592	48.726	20.317	21.091	5.306	1.5182	3.0411
T247G	SNV	chr3:49933591	66.435	6.7953	17.953	4.7648	2.0306	2.0205
T247C	SNV	chr3:49933591	63.057	7.6422	17.943	7.1687	1.708	2.4807
T247A	SNV	chr3:49933591	63.697	5.8562	19.613	6.972	1.7966	2.0659
C248T	SNV	chr3:49933590	64.25	5.9642	17.532	6.4693	3.0278	2.7572
C248G	SNV	chr3:49933590	62.495	6.6797	15.999	4.7707	5.7603	4.2959
C248A	SNV	chr3:49933590	65.244	9.7968	15.128	5.8467	1.6653	2.3187
T249G	SNV	chr3:49933589	65.993	7.5041	17.351	5.1744	1.3032	2.6736
T249C	SNV	chr3:49933589	59.857	8.3775	22.06	5.3955	2.0953	2.2149
T249A	SNV	chr3:49933589	64.35	6.674	19.286	4.4081	2.9003	2.3822
G250T	SNV	chr3:49933588	63.571	5.6725	20.891	6.1838	1.9238	1.7579
G250C	SNV	chr3:49933588	65.923	0.77544	21.19	8.9825	1.7215	1.4076
G250A	SNV	chr3:49933588	67.473	5.55	18.505	3.5724	3.0955	1.8038
GA251G	DEL	chr3:49933588	58.643	10.563	19.632	7.4767	1.4989	2.1866
A251T	SNV	chr3:49933587	61.653	7.0115	21.145	5.7178	2.0254	2.4479
A251G	SNV	chr3:49933587	60.907	7.2456	21.073	6.5179	2.1952	2.0612
A251C	SNV	chr3:49933587	59.921	8.563	22.426	6.9582	0.80548	1.3259
A252T	SNV	chr3:49933586	58.437	9.3852	21.423	6.3451	1.8518	2.5578
A252G	SNV	chr3:49933586	55.649	14.922	18.856	5.5835	1.618	3.3723
A252C	SNV	chr3:49933586	65.783	4.3138	18.917	7.3098	2.0406	1.6363
A253T	SNV	chr3:49933585	66.454	6.2412	17.791	5.2555	2.4593	1.7986
A253G	SNV	chr3:49933585	59.474	9.5789	19.802	6.3027	2.2195	2.6229
A253C	SNV	chr3:49933585	65.528	8.503	15.799	6.2815	1.8569	2.0311
G254T	SNV	chr3:49933584	54.848	2.8469	29.966	7.2315	3.7262	1.3812
G254C	SNV	chr3:49933584	55.717	7.9462	24.429	5.9357	3.0399	2.9322
G254A	SNV	chr3:49933584	65.117	3.9833	21.256	5.787	2.1177	1.7383
T255C	SNV	chr3:49933583	63.222	5.3	21.377	6.1254	2.1585	1.8174
T255A	SNV	chr3:49933583	70.004	5.149	16.258	4.495	2.617	1.4776
A256T	SNV	chr3:49933582	66.751	5.3372	16.619	7.7477	1.556	1.989
A256G	SNV	chr3:49933582	69.722	3.5087	16.312	6.5924	2.0068	1.8588
AG257A	DEL	chr3:49933582	62.554	7.42	19.43	5.9821	1.8286	2.785
G257T	SNV	chr3:49933581	72.091	6.4747	13.26	4.177	2.0798	1.9177
G257A	SNV	chr3:49933581	66.681	3.7321	20.348	4.7103	2.1005	2.4282
G258T	SNV	chr3:49933580	65.293	4.9148	17.519	7.1322	2.3366	2.8038
G258A	SNV	chr3:49933580	59.848	9.6813	20.1	5.8041	1.7012	2.8653
G259T	SNV	chr3:49933579	73.507	2.1089	13.46	5.68	3.1116	2.1333
G259C	SNV	chr3:49933579	75.347	2.9558	11.503	3.5076	5.5863	1.1005
G259A	SNV	chr3:49933579	69.483	5.1369	17.853	3.6953	2.2281	1.604
G260C	SNV	chr3:49933578	59.855	9.0651	19.813	3.6188	3.7888	3.8597
G260A	SNV	chr3:49933578	61.93	9.0479	18.629	5.6689	2.2796	2.4439
GC261G	DEL	chr3:49933578	63.298	4.2322	20.23	8.8239	1.2849	2.1309
C261T	SNV	chr3:49933577	62.653	6.2649	20.059	7.0277	2.2518	1.7435
C261G	SNV	chr3:49933577	60.79	9.7205	20.019	5.5161	1.4174	2.5371
C261A	SNV	chr3:49933577	20.095	42.77	29.76	3.3703	0.40296	3.6019
C262T	SNV	chr3:49933576	64.245	5.7051	18.546	7.1712	2.5395	1.7924
C262G	SNV	chr3:49933576	79.189	6.3116	9.6205	3.3947	0.84501	0.6394
C262A	SNV	chr3:49933576	61.202	8.6493	21.258	4.8634	1.678	2.3501
A263T	SNV	chr3:49933575	67.029	6.2976	17.619	4.7089	2.1105	2.2351
A263G	SNV	chr3:49933575	64.629	6.2118	19.895	4.5371	2.3106	2.4165
A263C	SNV	chr3:49933575	66.249	11.178	13.193	4.6665	0.54611	4.1673
G264T	SNV	chr3:49933574	74.906	3.348	12.647	4.5181	2.6525	1.9285
G264C	SNV	chr3:49933574	72.617	1.5445	13.713	7.9212	2.5496	1.655
G264A	SNV	chr3:49933574	69.452	4.4179	16.286	5.2954	2.6001	1.9493
C265T	SNV	chr3:49933573	64.608	5.3763	19.199	7.087	1.4298	2.2997
C265G	SNV	chr3:49933573	66.416	2.3063	20.066	7.4239	2.4862	1.3022
C265A	SNV	chr3:49933573	65.967	5.5453	18.806	5.2246	2.7233	1.7338
C266T	SNV	chr3:49933572	78.489	1.8389	11.941	4.3738	1.8279	1.5285
C266G	SNV	chr3:49933572	32.446	9.0723	19.544	34.409	1.7814	2.7468
C266A	SNV	chr3:49933572	54.878	3.9542	23.338	13.545	2.054	2.2308
T267C	SNV	chr3:49933571	67.96	4.1866	16.001	8.347	1.6987	1.8059
T267A	SNV	chr3:49933571	75.077	2.0539	13.826	4.5269	3.0429	1.4736
TA268T	DEL	chr3:49933571	68.483	1.4481	16.532	8.7942	3.0589	1.6843
A268T	SNV	chr3:49933570	71.592	3.0832	14.388	7.6533	1.7006	1.5823
A268G	SNV	chr3:49933570	63.776	3.3414	18.492	10.132	1.8942	2.3643
A268C	SNV	chr3:49933570	68.492	9.4633	11.2	4.4151	2.634	3.7958
C269T	SNV	chr3:49933569	70.547	3.5464	16.855	5.0942	2.3419	1.6155
C269G	SNV	chr3:49933569	71.322	4.7383	15.3	5.6029	1.2661	1.7707
C269A	SNV	chr3:49933569	77.918	1.3239	9.6107	4.5833	4.6917	1.8724
T270G	SNV	chr3:49933568	66.789	3.244	19.507	6.5947	2.4785	1.3872
T270C	SNV	chr3:49933568	64.068	6.1496	20.716	4.7329	2.2913	2.0426
T270A	SNV	chr3:49933568	70.752	5.3636	16.29	3.403	2.692	1.5001
TG271T	DEL	chr3:49933568	55.335	5.7915	20.633	13.118	2.547	2.5765
G271T	SNV	chr3:49933567	72.809	2.402	14.308	6.6069	2.1856	1.6886
G271C	SNV	chr3:49933567	65.201	2.3019	18.684	8.0228	2.81	2.9809
G271A	SNV	chr3:49933567	76.705	1.9711	13.494	2.7894	3.8392	1.2014
G272T	SNV	chr3:49933566	75.856	1.9945	12.974	4.8146	2.7746	1.5864
G272C	SNV	chr3:49933566	67.129	8.3236	15.558	6.1703	0.97037	1.8493
G272A	SNV	chr3:49933566	77.578	1.2286	8.8089	5.7805	5.1425	1.4618
C273T	SNV	chr3:49933565	67.336	4.3171	18.561	4.7627	3.4398	1.5834
C273G	SNV	chr3:49933565	61.357	8.8931	19.529	5.8371	2.335	2.049
C273A	SNV	chr3:49933565	76.349	2.5506	12.743	3.2671	3.8157	1.2741
T274G	SNV	chr3:49933564	72.767	2.3558	10.903	10.049	0.24953	3.6768
T274C	SNV	chr3:49933564	68.254	5.8154	18.003	4.6349	1.9418	1.3506
T274A	SNV	chr3:49933564	66.41	6.1141	18.158	5.8537	1.8171	1.6472
TG275T	DEL	chr3:49933564	47.961	9.6802	25.366	10.17	1.9741	4.8492
G275T	SNV	chr3:49933563	66.916	5.7312	16.165	6.2553	2.2061	2.7262
G275C	SNV	chr3:49933563	67.668	1.1281	19.35	8.3687	2.8076	0.67756
G275A	SNV	chr3:49933563	68.573	7.0788	14.432	5.405	2.3537	2.1577
G276T	SNV	chr3:49933562	70.157	3.9747	14.855	5.443	2.8086	2.7616
G276C	SNV	chr3:49933562	50.8	6.6865	25.669	11.211	2.9968	2.6369
G276A	SNV	chr3:49933562	80.251	1.7337	9.5231	4.1059	2.8353	1.5513
T277G	SNV	chr3:49933561	51.906	21.552	15.831	6.481	0.48146	3.7483
T277C	SNV	chr3:49933561	58.787	9.1271	19.422	8.5976	1.3992	2.6669
T277A	SNV	chr3:49933561	58.443	8.279	20.649	7.7192	2.6476	2.2619
C278T	SNV	chr3:49933560	66.629	6.0813	16.25	6.1644	2.8207	2.0542
C278G	SNV	chr3:49933560	57.353	11.223	19.726	7.57	2.5662	1.5608
C278A	SNV	chr3:49933560	57.583	7.3494	22.464	9.6352	1.4759	1.4929
C279T	SNV	chr3:49933559	58.066	11.457	20.01	4.8457	3.0051	2.6166
C279A	SNV	chr3:49933559	62.883	6.3479	20.016	6.1444	1.4896	3.1193
CT280C	DEL	chr3:49933559	10.495	43.678	34.136	3.4049	1.2077	7.0789
T280G	SNV	chr3:49933558	3.5239	52.816	36.607	1.9681	0.71141	4.3735
T280C	SNV	chr3:49933558	18.554	28.287	40.515	6.9445	0.67041	5.0292
T280A	SNV	chr3:49933558	20.561	37.211	32.206	5.2455	0.80604	3.9697
C281T	SNV	chr3:49933557	63.012	7.1264	19.578	6.0937	1.4466	2.7426
C281A	SNV	chr3:49933557	63.743	4.1952	16.704	9.1608	2.5526	3.6451
A282T	SNV	chr3:49933556	39.839	17.251	31.651	5.2651	3.5548	2.4388
A282G	SNV	chr3:49933556	11.548	43.24	38.794	2.2405	0.4201	3.7577
A282C	SNV	chr3:49933556	23.409	22.852	43.297	4.6024	1.2423	4.598
T283C	SNV	chr3:49933555	57.128	7.2013	22.436	8.9647	1.8118	2.4579
T283A	SNV	chr3:49933555	5.5827	50.54	35.181	3.1303	0.42947	5.1367
G284A	SNV	chr3:49933554	66.835	4.6563	18.932	6.3656	1.9338	1.277
A285T	SNV	chr3:49933553	68.247	4.6672	16.582	6.0999	2.427	1.9772
A285G	SNV	chr3:49933553	49.178	18.965	22.804	5.3539	1.577	2.121
AC286A	DEL	chr3:49933553	31.201	31.55	29.056	4.6939	1.1187	2.38
C286T	SNV	chr3:49933552	50.419	15.905	23.101	5.5363	2.5279	2.5105
C286G	SNV	chr3:49933552	45.551	12.837	29.737	7.8398	2.0194	2.016
C286A	SNV	chr3:49933552	68.537	5.2457	15.125	6.6805	2.8409	1.5714
C287T	SNV	chr3:49933551	81.363	0.85513	9.0166	4.9102	2.6981	1.1567
C287G	SNV	chr3:49933551	61.138	8.6835	20.924	4.7568	1.8005	2.6966
C287A	SNV	chr3:49933551	67.054	4.7545	18.161	6.0619	2.2659	1.7024
C288T	SNV	chr3:49933550	74.637	2.9303	14.488	3.8145	2.2656	1.8644
C288A	SNV	chr3:49933550	57.204	10.982	23.029	4.9366	1.809	2.0395
T289C	SNV	chr3:49933549	21.447	44.066	28.171	1.7507	0.7858	3.7788
T289A	SNV	chr3:49933549	20.239	37.213	36.499	2.7618	0.71738	2.5694
C290T	SNV	chr3:49933548	67.451	5.4462	19.544	3.7284	2.235	1.5949
C290A	SNV	chr3:49933548	36.397	27.555	25.849	5.8688	1.7145	2.6164
T291C	SNV	chr3:49933547	17.601	41.524	35.186	1.6805	1.1481	2.8602
T291A	SNV	chr3:49933547	6.7616	54.719	33.096	0.84791	0.56707	4.0083
C292T	SNV	chr3:49933546	73.787	1.6557	14.692	6.2372	2.9617	0.66652
C292G	SNV	chr3:49933546	14.695	50.531	30.618	1.1942	0.5086	2.454
C292A	SNV	chr3:49933546	13.014	48.048	33.543	2.2263	0.54008	2.6286
T293C	SNV	chr3:49933545	70.209	4.4617	15.435	5.5384	2.6344	1.7214
G294T	SNV	chr3:49933544	44.203	19.224	26.849	5.5158	1.58	2.6286
G294C	SNV	chr3:49933544	54.273	12.482	25.131	3.7308	1.6862	2.696
G294A	SNV	chr3:49933544	70.873	4.3383	14.344	6.0144	2.7404	1.6894
C295T	SNV	chr3:49933543	43.924	25.78	21.048	5.3223	1.0497	2.8753
C295G	SNV	chr3:49933543	0.69503	82.948	14.86	0.28347	0.072866	1.1413
C295A	SNV	chr3:49933543	1.6254	76.66	19.313	0.187	0.18921	2.0246
CA296C	DEL	chr3:49933543	1.0322	83.012	14.212	0.48408	0.035476	1.2241
A296T	SNV	chr3:49933542	0.74393	81.369	16.577	0.061468	0.095719	1.1523
A296G	SNV	chr3:49933542	0.7479	80.97	15.843	0.10762	0.17066	2.1602
A296C	SNV	chr3:49933542	0.53972	80.871	17.419	0.083265	0.10024	0.9873
G297T	SNV	chr3:49933541	0.90384	84.506	13.18	0.10007	0.12246	1.1883
G297C	SNV	chr3:49933541	0.36868	87.422	10.998	0.072124	0.084482	1.0546
G297A	SNV	chr3:49933541	0.67006	82.51	15.61	0.12081	0.1185	0.9705
G298T	SNV	chr3:49933540	5.3814	66.025	25.093	0.83713	0.45594	2.208
G298C	SNV	chr3:49933540	7.3666	62.762	25.083	0.27821	1.0735	3.4363
G298A	SNV	chr3:49933540	16.289	49.233	28.33	2.5378	0.59021	3.0193
A299T	SNV	chr3:49933539	69.45	4.3664	15.974	5.697	3.0302	1.4824
A299G	SNV	chr3:49933539	10.041	63.639	20.277	2.0358	0.64924	3.3577
T300C	SNV	chr3:49933538	79.865	4.3011	8.539	4.2698	2.1748	0.85001
T300A	SNV	chr3:49933538	69.719	3.0662	21.163	2.8569	1.582	1.6124
A301T	SNV	chr3:49933537	68.868	6.603	14.396	4.381	3.618	2.134
A301G	SNV	chr3:49933537	61.652	6.6086	21.783	5.7536	2.4166	1.7866
T302C	SNV	chr3:49933536	70.509	4.0534	15.406	5.6159	2.7189	1.6966
T302A	SNV	chr3:49933536	61.986	8.5131	20	5.4002	2.0526	2.0479
T303C	SNV	chr3:49933535	79.072	1.7158	9.3979	5.1934	3.369	1.2519
T303A	SNV	chr3:49933535	69.76	2.7209	13.524	7.9084	2.6194	3.4674
TG304T	DEL	chr3:49933535	72.769	2.3467	15.688	5.0455	3.0518	1.099
G304A	SNV	chr3:49933534	75.991	1.4819	14.735	4.3356	2.2286	1.2277
G305T	SNV	chr3:49933533	81.588	0.88434	9.2137	3.6996	3.3959	1.2187
G305C	SNV	chr3:49933533	75.146	0.94689	11.331	5.8285	4.9235	1.8238
G305A	SNV	chr3:49933533	78.9	0.91497	10.943	4.9036	3.3954	0.94269
G306T	SNV	chr3:49933532	81.89	1.1442	9.7408	2.9654	2.6118	1.648
G306C	SNV	chr3:49933532	84.397	1.017	8.3041	3.4831	2.1671	0.63142
G306A	SNV	chr3:49933532	80.597	0.47773	8.1993	4.9598	4.4868	1.2793
C307T	SNV	chr3:49933531	28.708	34.887	29.2	2.7981	1.0146	3.3925
C307G	SNV	chr3:49933531	5.5778	68.07	22.072	0.83484	0.28159	3.1633
C307A	SNV	chr3:49933531	56.323	12.432	21.781	5.5805	1.7645	2.1184
T308G	SNV	chr3:49933530	51.383	16.893	20.218	4.9317	2.1571	4.4176
T308C	SNV	chr3:49933530	78.031	1.5182	10.149	5.9244	3.0877	1.2891
T308A	SNV	chr3:49933530	66.206	5.4208	19.241	4.9944	1.395	2.7428
TG309T	DEL	chr3:49933530	72.051	1.8523	14.191	6.7412	3.7745	1.3896
G309T	SNV	chr3:49933529	75.832	1.429	15.882	2.9499	3.3167	0.5907
G309C	SNV	chr3:49933529	84.314	0.79575	10.914	1.6363	2.0431	0.29708
G309A	SNV	chr3:49933529	67.455	3.5387	19.356	4.5447	3.3259	1.7792
G310T	SNV	chr3:49933528	79.403	1.0993	9.7992	4.5408	3.4483	1.7096
G310A	SNV	chr3:49933528	81.432	0.87472	9.355	4.8211	2.6321	0.88514
G311T	SNV	chr3:49933527	77.723	3.0217	6.2879	9.7614	1.7939	1.4123
G311A	SNV	chr3:49933527	83.924	0.63891	6.7525	4.0508	3.5417	1.0922
C312T	SNV	chr3:49933526	43.432	21.616	24.534	5.8	1.4974	3.1206
C312A	SNV	chr3:49933526	65.983	7.3309	17.638	4.9558	2.1303	1.9619
G313T	SNV	chr3:49933525	34.091	29.155	27.906	3.6199	1.3775	3.8514
G313C	SNV	chr3:49933525	67.392	6.3754	17.035	5.0947	2.2526	1.8501
G313A	SNV	chr3:49933525	45.018	21.017	24.965	4.835	1.4077	2.7571
C314T	SNV	chr3:49933524	44.568	14.206	30.027	4.8161	1.4936	4.8889
C314A	SNV	chr3:49933524	51.413	12.449	24.186	7.0668	1.8071	3.077
T315G	SNV	chr3:49933523	49.638	14.749	25.344	5.4652	0.95695	3.847
T315C	SNV	chr3:49933523	73.665	3.0997	14.809	5.1153	2.061	1.2502
T315A	SNV	chr3:49933523	54.498	11.635	23.528	5.9733	1.7044	2.6613
G316T	SNV	chr3:49933522	44.45	21.269	25.633	3.5453	1.9644	3.1383
G316C	SNV	chr3:49933522	61.249	14.89	13.565	2.1649	2.3393	5.7922
G316A	SNV	chr3:49933522	53.33	12.864	24.253	5.4152	1.8671	2.2703
T317G	SNV	chr3:49933521	7.6159	51.206	28.99	1.7456	3.1042	7.3381
T317C	SNV	chr3:49933521	73.741	2.1868	12.711	6.5496	2.9848	1.8263
T317A	SNV	chr3:49933521	55.31	9.6704	25.176	6.0169	1.587	2.2398
G318T	SNV	chr3:49933520	70.697	2.7432	17.062	5.5611	2.508	1.4286
G318C	SNV	chr3:49933520	73.662	2.39	14.02	4.4292	3.7588	1.7404
G318A	SNV	chr3:49933520	58.047	9.875	22.221	5.3146	1.8853	2.6573
G319T	SNV	chr3:49933519	58.161	11.895	15.724	5.2954	1.9667	6.9589
G319C	SNV	chr3:49933519	52.965	8.6809	21.199	11.305	2.1345	3.716
G319A	SNV	chr3:49933519	72.707	4.6563	14.381	4.3692	2.174	1.7128
C320T	SNV	chr3:49933518	39.19	28.334	23.525	4.401	1.2363	3.3137
C320G	SNV	chr3:49933518	7.8417	63.881	23.285	2.0898	0.35471	2.5473
C320A	SNV	chr3:49933518	55.281	6.7231	26.871	6.2863	2.5561	2.2819
T321G	SNV	chr3:49933517	61.163	7.7383	19.413	7.9077	1.7191	2.058
T321C	SNV	chr3:49933517	72.606	3.3727	14.563	5.4592	2.679	1.3204
T321A	SNV	chr3:49933517	50.298	15.186	23.794	6.2184	1.7705	2.734
G322T	SNV	chr3:49933516	38.695	20.75	28.364	8.1059	1.655	2.4313
G322C	SNV	chr3:49933516	55.183	13.374	21.379	5.5325	1.9949	2.5367
G322A	SNV	chr3:49933516	39.608	28.551	23.553	4.259	1.1005	2.929
A323T	SNV	chr3:49933515	59.435	9.8353	20.376	5.719	1.9836	2.6513
A323G	SNV	chr3:49933515	49.044	19.94	22.386	4.2658	1.3744	2.99
A323C	SNV	chr3:49933515	72.969	6.2585	13	2.5022	2.9466	2.3235
C324T	SNV	chr3:49933514	52.15	16.714	21.678	4.7407	1.799	2.9182
C324A	SNV	chr3:49933514	58.315	16.384	15.638	4.5953	1.7232	3.345
T325G	SNV	chr3:49933513	73.478	1.8666	10.976	9.0795	3.3961	1.2043
T325C	SNV	chr3:49933513	80.079	2.8155	9.5016	3.6238	2.4475	1.5325
T325A	SNV	chr3:49933513	53.865	12.846	24.081	4.7794	1.9602	2.4675
TG326T	DEL	chr3:49933513	56.788	3.5502	25.923	9.3758	2.5544	1.8083
G326T	SNV	chr3:49933512	57.85	9.9188	20.783	5.3702	2.1218	3.9558
G326C	SNV	chr3:49933512	67.947	2.9338	19.054	5.0018	2.6254	2.4378
G326A	SNV	chr3:49933512	60.916	9.2987	19.551	5.5198	2.0278	2.686
T327G	SNV	chr3:49933511	30.324	38.314	19.498	5.1703	2.5733	4.1197
T327C	SNV	chr3:49933511	78.316	1.1292	11.475	4.5873	3.3375	1.1548
T327A	SNV	chr3:49933511	65.467	5.153	18.585	6.7776	2.1775	1.8393
G328T	SNV	chr3:49933510	66.613	5.432	17.136	5.1364	2.9958	2.6874
G328C	SNV	chr3:49933510	75.504	2.0405	12.344	6.008	2.7548	1.349
G328A	SNV	chr3:49933510	67.817	7.0731	17.009	4.0392	2.1332	1.9285
T329G	SNV	chr3:49933509	51.526	19.709	19.79	4.6271	1.3574	2.9916
T329C	SNV	chr3:49933509	76.811	1.6802	11.324	5.3021	3.3527	1.5299
T329A	SNV	chr3:49933509	74.331	2.6547	14.223	4.728	2.5931	1.4707
TG330T	DEL	chr3:49933509	81.292	1.1963	7.3791	6.0183	3.2739	0.8408
G330T	SNV	chr3:49933508	77.131	0.8675	11.075	7.6939	2.4433	0.78905
G330C	SNV	chr3:49933508	82.123	1.8567	8.0468	3.6966	3.3974	0.87971
G330A	SNV	chr3:49933508	56.828	4.2775	27.477	6.7385	2.0424	2.6371
G331T	SNV	chr3:49933507	81.526	1.1523	9.4161	4.4347	2.285	1.186
G331C	SNV	chr3:49933507	80.518	0.63271	9.2209	4.671	3.7797	1.1781
G331A	SNV	chr3:49933507	74.665	0.83953	14.652	3.9723	3.803	2.0685
G332C	SNV	chr3:49933506	71.103	3.3046	10.342	8.184	3.109	3.9576
G332A	SNV	chr3:49933506	83.005	0.58335	7.3902	5.5099	2.3131	1.1989
T333C	SNV	chr3:49933505	76.719	2.0225	11.8	5.148	3.0462	1.2637
T333A	SNV	chr3:49933505	74.685	1.8927	12.439	6.9448	2.2104	1.8282
A334T	SNV	chr3:49933504	64.398	6.9823	19.151	3.2606	2.1475	4.0606
A334G	SNV	chr3:49933504	69.606	5.7585	15.808	4.8242	2.0298	1.9739
T335C	SNV	chr3:49933503	68.829	5.4734	15.936	6.3557	1.6896	1.7157
T335A	SNV	chr3:49933503	59.696	9.7775	21.248	5.106	2.0448	2.1275
C336T	SNV	chr3:49933502	23.1	43.105	25.541	3.8937	0.5939	3.7658
C336A	SNV	chr3:49933502	73.211	8.5923	13.654	2.6217	0.24823	1.6721
A337T	SNV	chr3:49933501	65.141	9.0456	17.642	3.4899	1.5947	3.0875
A337G	SNV	chr3:49933501	72.88	3.1717	14.249	5.5295	2.536	1.6342
A337C	SNV	chr3:49933501	65.94	5.8761	19.918	6.0113	0.72588	1.5293
A338T	SNV	chr3:49933500	64.762	6.5758	19.746	4.7867	1.9855	2.1445
A338G	SNV	chr3:49933500	59.554	11.141	18.947	5.5385	2.0459	2.7748
A338C	SNV	chr3:49933500	64.528	5.3649	17.937	9.2361	1.5682	1.3657
C339T	SNV	chr3:49933499	21.721	44.098	27.818	2.9261	0.82706	2.6107
C339A	SNV	chr3:49933499	20.886	43.169	27.082	4.5891	0.85774	3.4163
G340T	SNV	chr3:49933498	65.665	12.599	15.411	1.5568	1.7364	3.0321
G340C	SNV	chr3:49933498	47.816	11.03	33.844	3.5221	1.455	2.3333
G340A	SNV	chr3:49933498	49.456	17.017	23.527	5.8122	1.7384	2.45
T341G	SNV	chr3:49933497	16.526	47.154	28.443	2.8789	0.9723	4.0259
T341C	SNV	chr3:49933497	73.909	2.8871	14.047	4.8988	2.8521	1.4068
T341A	SNV	chr3:49933497	67.458	6.7875	16.773	5.1651	2.1577	1.6588
G342T	SNV	chr3:49933496	60.363	10.14	19.827	5.7521	1.1403	2.778
G342A	SNV	chr3:49933496	47.567	17.933	23.052	6.5913	1.2913	3.5655
A343T	SNV	chr3:49933495	54.952	15.992	20.457	4.6622	1.8517	2.0854
A343G	SNV	chr3:49933495	60.773	10.671	18.6	5.5344	1.918	2.5033
A343C	SNV	chr3:49933495	52.988	17.708	16.97	8.3442	1.859	2.1312
AC344A	DEL	chr3:49933495	67.346	4.3981	18.949	6.2063	0.71343	2.3879
C344T	SNV	chr3:49933494	58.414	9.4109	21.439	6.118	1.6924	2.9256
C344G	SNV	chr3:49933494	49.092	13.719	23.51	4.663	6.6071	2.4093
C344A	SNV	chr3:49933494	37.224	36.042	18.319	7.4228	0.5921	0.40001
C345T	SNV	chr3:49933493	47.917	16.284	27.514	3.782	1.998	2.5052
C345G	SNV	chr3:49933493	59.559	19.069	16.289	1.4743	1.0456	2.5628
C345A	SNV	chr3:49933493	45.765	20.99	24.404	4.3023	1.4675	3.0714
G346T	SNV	chr3:49933492	68.854	4.9069	16.76	5.8724	2.0508	1.5564
G346C	SNV	chr3:49933492	63.268	12.175	15.181	3.8505	2.1974	3.328
G346A	SNV	chr3:49933492	70.928	3.8043	15.999	4.9724	2.269	2.0282
T347G	SNV	chr3:49933491	51.817	18.395	20.982	3.6142	1.497	3.6941
T347C	SNV	chr3:49933491	73.561	2.708	13.647	6.0133	2.5805	1.4903
T347A	SNV	chr3:49933491	72.694	3.3351	15.438	4.8144	2.32	1.3987
TG348T	DEL	chr3:49933491	69.662	2.0079	19.978	3.1965	3.5641	1.5914
G348T	SNV	chr3:49933490	68.272	2.6174	19.319	5.6184	2.6743	1.4989
G348C	SNV	chr3:49933490	82.479	0.096366	3.3714	11.007	2.906	0.1409
G349T	SNV	chr3:49933489	64.712	3.8086	22.424	5.5063	2.192	1.357
G349C	SNV	chr3:49933489	46.031	12.814	31.844	5.1345	1.5992	2.5775
G349A	SNV	chr3:49933489	78.456	0.71999	11.095	4.1984	3.5611	1.9696
G350C	SNV	chr3:49933488	45.156	9.8186	31.507	7.2304	3.319	2.969
G350A	SNV	chr3:49933488	83.727	0.32322	6.9844	4.6273	3.2173	1.1205
G350GT	IN	chr3:49933488	27.726	0.89926	7.9393	59.905	1.1798	2.3509
GT351G	DEL	chr3:49933488	66.992	2.6308	18.822	7.6238	2.8351	1.0964
T351C	SNV	chr3:49933487	68.955	2.7837	17.802	6.5282	1.9925	1.938
T351A	SNV	chr3:49933487	79.049	1.4906	11.186	4.0382	2.7244	1.5116
TG352T	DEL	chr3:49933487	63.33	5.6088	22.736	2.6407	3.7402	1.9445
G352T	SNV	chr3:49933486	71.784	2.7954	16.11	5.1068	2.8063	1.3973
G352C	SNV	chr3:49933486	82.307	0.4456	9.4472	3.8809	2.7985	1.1211
G352A	SNV	chr3:49933486	56.667	8.3435	23.808	6.1529	3.0793	1.9493
G353T	SNV	chr3:49933485	83.741	1.8755	8.0741	1.6766	2.4818	2.1509
G353C	SNV	chr3:49933485	69.321	1.8054	17.916	6.9906	2.4781	1.4895
G353A	SNV	chr3:49933485	77.689	0.96945	9.884	7.5121	2.8251	1.1206
GT354G	DEL	chr3:49933485	12.968	66.522	15.789	1.9152	0.2532	2.5527
T354G	SNV	chr3:49933484	61.568	8.183	21.936	3.2108	1.7257	3.3769
T354C	SNV	chr3:49933484	56.659	9.5702	24.529	5.0751	1.7488	2.4181
T354A	SNV	chr3:49933484	76.596	2.7326	11.788	4.7548	2.5315	1.5971
G355T	SNV	chr3:49933483	29.624	28.53	35.28	1.06	0.5031	5.003
G355C	SNV	chr3:49933483	56.491	14.278	23.49	3.2883	1.9081	0.54471
G355A	SNV	chr3:49933483	50.638	14.787	27.01	2.974	2.9097	1.6817
GA356G	DEL	chr3:49933483	55.843	6.2222	30.115	4.5718	1.5615	1.6856
A356T	SNV	chr3:49933482	58.498	10.859	20.457	5.7112	1.9546	2.5197
A356G	SNV	chr3:49933482	9.1363	67.445	18.606	1.5716	0.34442	2.897
G357T	SNV	chr3:49933481	38.11	27.422	25.463	5.5686	1.0385	2.3984
G357A	SNV	chr3:49933481	60.869	7.0113	22.386	4.9809	1.8729	2.8801
A358T	SNV	chr3:49933480	43.981	19.113	28.459	3.1601	2.0863	3.2012
A358G	SNV	chr3:49933480	6.9605	68.809	20.002	0.93259	0.3142	2.9817
A358C	SNV	chr3:49933480	62.229	8.2094	19.149	4.0385	4.0729	2.3013
G359T	SNV	chr3:49933479	66.587	5.0677	17.472	5.911	2.4158	2.5463
G359C	SNV	chr3:49933479	61.706	5.6857	20.247	7.5949	2.2852	2.4815
G359A	SNV	chr3:49933479	61.25	7.662	21.187	4.9055	2.0283	2.9673
C360T	SNV	chr3:49933478	46.62	18.95	23.45	6.0261	1.5548	3.3993
C360A	SNV	chr3:49933478	54.088	11.468	24.152	5.8851	2.4683	1.9383
T361G	SNV	chr3:49933477	61.392	4.897	24.641	4.1484	1.8622	3.0602
T361C	SNV	chr3:49933477	60.979	8.07	20.678	6.0199	1.3319	2.9211
T361A	SNV	chr3:49933477	57.341	12.409	20.584	5.0838	1.9298	2.6523
G362T	SNV	chr3:49933476	47.3	10.123	32.505	2.3005	2.3804	5.3906
G362C	SNV	chr3:49933476	36.459	35.193	20.934	4.013	1.0944	2.3075
G362A	SNV	chr3:49933476	57.511	10.699	21.534	6.2487	1.7773	2.2301
GC363G	DEL	chr3:49933476	56.19	8.0506	25.688	6.4606	1.0076	2.6032
C363T	SNV	chr3:49933475	50.515	15.78	25.045	4.4874	1.5643	2.6085
C363G	SNV	chr3:49933475	51.454	12.238	26.291	4.7298	2.8532	2.4344
C363A	SNV	chr3:49933475	59.299	7.8962	20.951	5.5022	2.7753	3.5765
C364T	SNV	chr3:49933474	45.914	22.313	23.369	3.9563	1.3719	3.0761
C364G	SNV	chr3:49933474	62.462	8.5212	16.784	6.0962	3.0827	3.0537
C364A	SNV	chr3:49933474	61.505	7.4784	20.818	4.7331	3.2935	2.1716
A365T	SNV	chr3:49933473	52.008	15.148	23.837	4.3815	1.8197	2.8056
A365G	SNV	chr3:49933473	68.314	5.1571	16.638	6.0867	2.2635	1.5412
A365C	SNV	chr3:49933473	32.976	22.072	34.141	6.9189	1.4818	2.4102
G366T	SNV	chr3:49933472	59.966	9.5195	21.14	5.3312	1.7911	2.2523
G366C	SNV	chr3:49933472	46.079	15.276	32.427	2.6394	1.4427	2.1361
G366A	SNV	chr3:49933472	59.051	12.184	19.358	4.6973	1.9554	2.7541
C367T	SNV	chr3:49933471	56.809	12.795	18.648	6.7481	1.8194	3.1816
C367G	SNV	chr3:49933471	65.261	7.1069	15.902	9.4385	1.4561	0.83488
C367A	SNV	chr3:49933471	67.829	5.1937	16.598	5.6335	2.8197	1.926
C367CA	IN	chr3:49933471	69.714	3.4352	14.974	7.3944	2.8139	1.669
A368T	SNV	chr3:49933470	53.164	13.906	22.921	4.9246	1.99	3.0952
A368G	SNV	chr3:49933470	66.337	5.7154	17.813	5.8131	2.1788	2.142
A368C	SNV	chr3:49933470	54.418	17.013	20.104	4.5017	1.4965	2.4664
C369T	SNV	chr3:49933469	52.115	14.584	23.727	5.4308	1.7856	2.3577
C369G	SNV	chr3:49933469	62.467	7.8963	19.248	6.2175	2.141	2.0298
C369A	SNV	chr3:49933469	69.009	2.8316	17.425	5.0428	4.2569	1.4347
G370T	SNV	chr3:49933468	32.907	32.555	25.961	4.3225	1.8532	2.4011
G370A	SNV	chr3:49933468	59.871	10.469	20.88	4.4388	2.1436	2.1979
A371T	SNV	chr3:49933467	57.454	10.325	22.843	5.3756	1.8966	2.1056
A371G	SNV	chr3:49933467	24.067	35.563	32.704	3.5459	0.56508	3.5547
G372A	SNV	chr3:49933466	61.466	9.3364	18.803	6.0668	2.19	2.1383
GT373G	DEL	chr3:49933466	53.51	16.824	18.389	8.2753	1.1157	1.8863
T373C	SNV	chr3:49933465	60.796	9.5881	20.122	5.6175	1.7843	2.0928
T373A	SNV	chr3:49933465	69.669	3.4253	16.475	5.6813	3.1261	1.6239
T374G	SNV	chr3:49933464	51.674	7.2315	28.816	7.0222	1.0596	4.1964
T374C	SNV	chr3:49933464	52.062	14.979	24.314	5.1663	1.6436	1.8342
T374A	SNV	chr3:49933464	61.256	7.9253	20.687	5.251	2.5591	2.3209
TC375T	DEL	chr3:49933464	57.478	9.7277	20.632	7.6179	1.6649	2.8799
C375T	SNV	chr3:49933463	52.319	11.825	24.572	6.9235	1.6948	2.665
C375G	SNV	chr3:49933463	56.802	10.062	23.765	5.9358	1.3509	2.0846
C375A	SNV	chr3:49933463	47.723	21.308	22.272	3.9043	1.7309	3.0612
C376T	SNV	chr3:49933462	52.014	14.441	24.544	5.4176	0.95492	2.629
C376G	SNV	chr3:49933462	48.567	26.426	18.895	1.5005	0.54024	4.0719
C376A	SNV	chr3:49933462	57.414	9.74	21.917	6.3705	1.4612	3.0979
C376CG	IN	chr3:49933462	49.671	19.05	22.82	4.355	1.6259	2.4783
CG377C	DEL	chr3:49933462	67.113	3.7655	17.212	6.9708	2.7212	2.218
G377T	SNV	chr3:49933461	74.915	3.5965	14.345	3.6513	1.7975	1.6947
G377C	SNV	chr3:49933461	66.069	4.6966	18.452	7.1732	2.2969	1.3117
G377A	SNV	chr3:49933461	67.351	3.1585	19.633	5.3023	2.4544	2.1005
G378T	SNV	chr3:49933460	69.473	3.4588	15.319	4.8535	1.894	5.002
G378A	SNV	chr3:49933460	71.309	2.4075	15.873	4.3887	2.7252	3.2964
G379T	SNV	chr3:49933459	73.304	1.9901	14.722	3.7729	3.042	3.1685
G379A	SNV	chr3:49933459	80.89	1.2418	8.4802	4.6344	2.9615	1.7918
G380T	SNV	chr3:49933458	69.479	3.3609	16.344	4.7283	3.7425	2.3452
G380C	SNV	chr3:49933458	83.421	2.6519	7.9855	2.8873	2.0161	1.0386
G380A	SNV	chr3:49933458	77.29	1.3055	10.871	5.0153	3.3251	2.194
G380GA	IN	chr3:49933458	67.235	6.0457	17.104	4.7724	1.915	2.9276
G381C	SNV	chr3:49933457	69.755	1.5083	16.944	6.0025	3.2245	2.5664
G381A	SNV	chr3:49933457	75.03	1.6327	13.498	5.1938	2.6005	2.0451
G382T	SNV	chr3:49933456	43.858	14.146	28.649	5.9655	2.1127	5.2693
G382A	SNV	chr3:49933456	64.41	4.8303	18.543	6.2624	1.5913	4.3624
A383T	SNV	chr3:49933455	45.703	22.203	21.429	3.653	1.3961	5.6157
A383G	SNV	chr3:49933455	65.036	7.0662	19.406	5.3475	1.9839	1.1596
A383C	SNV	chr3:49933455	62.129	4.3497	22.434	6.0094	3.7532	1.3253
C384T	SNV	chr3:49933454	41.682	25.515	24.228	5.0962	1.6072	1.8721
C384A	SNV	chr3:49933454	43.276	26.199	21.331	4.5268	1.5769	3.0901
A385T	SNV	chr3:49933453	57.568	8.2656	24.547	5.3082	2.0904	2.2203
A385G	SNV	chr3:49933453	67.994	6.7032	16.294	5.6836	1.8221	1.5035
A385C	SNV	chr3:49933453	65.406	7.0674	15.804	9.4296	1.5215	0.77095
T386G	SNV	chr3:49933452	59.742	8.9036	19.824	8.3854	1.4384	1.7062
T386C	SNV	chr3:49933452	67.45	4.6507	17.504	6.3212	2.1962	1.8778
T386A	SNV	chr3:49933452	64.27	7.0912	18.469	6.1535	2.3053	1.7106
TG387T	DEL	chr3:49933452	63.398	7.0183	19.99	5.2144	2.2113	2.1679
G387T	SNV	chr3:49933451	58.684	9.9262	20.702	5.6157	2.2257	2.8467
G387A	SNV	chr3:49933451	42.698	21.963	25.493	6.3326	1.2059	2.3078
G388T	SNV	chr3:49933450	57.056	8.5463	22.413	6.4141	2.8825	2.6874
G388C	SNV	chr3:49933450	61.832	8.07	18.939	7.2536	2.1097	1.7962
G388A	SNV	chr3:49933450	64.712	4.3188	18.807	4.2393	1.9528	5.9701
GT389G	DEL	chr3:49933450	63.48	4.5758	17.952	12.057	0.69164	1.2434
T389G	SNV	chr3:49933449	59.805	11.808	18.225	6.1311	2.2506	1.7798
T389C	SNV	chr3:49933449	70.11	2.7402	16.438	6.4025	2.776	1.5331
T389A	SNV	chr3:49933449	77.893	0.90167	11.047	6.2137	2.98	0.96467
T390G	SNV	chr3:49933448	62.515	7.1347	18.492	7.8455	2.2198	1.7931
T390C	SNV	chr3:49933448	73.954	1.9551	13.099	6.7451	2.8879	1.359
T390A	SNV	chr3:49933448	48.917	21.249	22.489	4.9282	1.0617	1.3557
G391T	SNV	chr3:49933447	45.397	16.945	25.773	5.7414	1.8082	4.3355
G391C	SNV	chr3:49933447	57.1	12.273	21.044	3.9666	2.068	3.5488
G391A	SNV	chr3:49933447	55.716	14.9	19.288	5.2067	1.9903	2.8995
T392C	SNV	chr3:49933446	65.408	7.1325	18.585	4.5543	2.983	1.3366
T392A	SNV	chr3:49933446	63.049	5.9221	20.056	4.8233	1.7728	4.377
C393T	SNV	chr3:49933445	47.916	20.767	20.062	6.0227	1.3404	3.8914
C393G	SNV	chr3:49933445	57.206	10.08	21.544	5.7032	2.0992	3.3672
C393A	SNV	chr3:49933445	60.012	15.076	15.742	4.3795	1.516	3.2751
T394G	SNV	chr3:49933444	70.828	5.634	14.434	6.0831	1.8801	1.1407
T394C	SNV	chr3:49933444	72.37	2.2986	16.077	5.7989	2.2815	1.1738
T394A	SNV	chr3:49933444	59.975	9.8273	19.212	7.2495	1.5084	2.2277
G395T	SNV	chr3:49933443	61.247	6.4885	22.778	4.5554	1.9614	2.9695
G395C	SNV	chr3:49933443	66.925	6.6929	15.993	6.0111	1.7822	2.5961
G395A	SNV	chr3:49933443	63.257	6.5503	20.52	5.279	2.2282	2.1655
G395GC	IN	chr3:49933443	44.844	7.9115	33.855	8.7862	2.0289	2.5738
GC396G	DEL	chr3:49933443	63.257	5.69	20.326	6.325	2.0627	2.3399
C396T	SNV	chr3:49933442	66.715	3.8349	17.421	5.8699	2.1723	3.9869
C396G	SNV	chr3:49933442	63.943	10.581	17.402	4.1449	1.7331	2.195
C397T	SNV	chr3:49933441	64.983	4.4871	18.037	6.5891	3.3069	2.5965
C397G	SNV	chr3:49933441	76.648	2.1524	10.74	5.1318	3.0287	2.2997
C397A	SNV	chr3:49933441	74.732	2.5319	12.406	5.7746	2.2685	2.2866
C398T	SNV	chr3:49933440	71.977	2.2678	14.795	5.1717	2.9425	2.8463
C398A	SNV	chr3:49933440	69.182	3.7386	17.97	4.2082	2.4322	2.4696
C399T	SNV	chr3:49933439	65.831	6.7891	16.697	5.077	2.2157	3.3901
C399A	SNV	chr3:49933439	69.647	4.7475	15.694	5.6339	2.7279	1.5498
C400T	SNV	chr3:49933438	63.995	6.9071	19.152	4.8305	2.1586	2.9577
C400G	SNV	chr3:49933438	65.45	6.1104	18.336	6.3985	2.0622	1.6426
C400A	SNV	chr3:49933438	66.787	6.0119	17.317	6.1586	1.9349	1.7906
T401G	SNV	chr3:49933437	69.569	5.6402	18.183	1.8814	2.5789	2.147
T401C	SNV	chr3:49933437	65.797	5.3358	19.362	5.7377	2.4777	1.29
T401A	SNV	chr3:49933437	64.868	4.8184	19.86	6.5557	2.063	1.8351
G402T	SNV	chr3:49933436	58.872	7.9334	23.389	3.8937	1.6291	4.2826
G402C	SNV	chr3:49933436	59.449	8.078	20.05	4.3195	2.7671	5.3358
G402A	SNV	chr3:49933436	61.786	7.2413	20.303	6.4006	2.116	2.1522
GC403G	DEL	chr3:49933436	61.015	7.0916	20.638	5.5559	2.7531	2.9469
C403T	SNV	chr3:49933435	62.234	4.9465	20.081	6.6683	2.2941	3.7766
C403G	SNV	chr3:49933435	67.061	6.4781	15.902	6.7412	2.7118	1.1061
C403A	SNV	chr3:49933435	63.598	6.1896	18.701	7.8242	1.9019	1.7847
C404T	SNV	chr3:49933434	62.032	6.5468	21.292	5.3302	2.1479	2.6506
C404A	SNV	chr3:49933434	71.396	2.4436	17.025	5.6443	2.5934	0.89789
C405T	SNV	chr3:49933433	68.765	3.5385	17.157	5.3282	2.7355	2.4761
C405A	SNV	chr3:49933433	66.387	1.8938	18.463	8.8726	2.7905	1.5936
C406T	SNV	chr3:49933432	66.19	4.7085	17.552	6.3836	2.8042	2.3616
C406G	SNV	chr3:49933432	78.897	1.8413	10.29	6.4837	1.8168	0.67031
C406A	SNV	chr3:49933432	69.119	4.7016	16.099	6.5074	1.9255	1.6478
C407T	SNV	chr3:49933431	56.947	13.37	20.722	4.5058	1.9132	2.5422
C407G	SNV	chr3:49933431	72.28	2.98	14.21	5.44	3.68	1.41
C407A	SNV	chr3:49933431	65.173	8.7356	19.665	3.3412	1.8048	1.281
A408T	SNV	chr3:49933430	58.799	8.4133	22.56	5.534	1.8969	2.7965
A408G	SNV	chr3:49933430	69.658	3.6889	17.402	5.1678	2.3377	1.746
A408C	SNV	chr3:49933430	60.488	7.3577	20.049	5.0476	2.7654	4.2925
T409G	SNV	chr3:49933429	68.668	7.543	15.534	6.0985	1.0508	1.106
T409C	SNV	chr3:49933429	66.377	5.0254	19.231	4.8974	2.4775	1.9915
T409A	SNV	chr3:49933429	71.778	3.1915	16.426	4.3783	2.2541	1.9725
TC410T	DEL	chr3:49933429	59.133	11.811	20.641	4.7039	1.9346	1.7759
C410T	SNV	chr3:49933428	63.081	7.1334	19.597	5.3848	2.1115	2.6918
C410A	SNV	chr3:49933428	67.238	6.4186	18.148	5.482	1.7297	0.98395
C411T	SNV	chr3:49933427	72.471	2.9103	14.432	6.1199	1.9334	2.1328
C411A	SNV	chr3:49933427	73.534	1.5042	15.49	5.7986	2.394	1.2792
C412T	SNV	chr3:49933426	53.691	13.432	24.769	4.3882	1.0509	2.6686
C412A	SNV	chr3:49933426	68.212	8.1459	17.179	2.1429	2.7164	1.6039
CT413C	DEL	chr3:49933426	65.201	6.2763	19.139	5.7289	1.3206	2.3341
T413G	SNV	chr3:49933425	51.092	18.862	15.974	10.868	1.567	1.6372
T413C	SNV	chr3:49933425	65.325	9.0235	17.519	3.7344	2.3319	2.0655
T413A	SNV	chr3:49933425	61.417	9.7051	20.243	4.6179	2.0255	1.9911
G414T	SNV	chr3:49933424	66.301	5.8687	18.57	5.8179	1.6463	1.7961
G414C	SNV	chr3:49933424	66.181	3.952	18.986	7.7313	1.8472	1.3024
G414A	SNV	chr3:49933424	54.422	13.116	21.05	3.7302	3.0088	4.6725
C415T	SNV	chr3:49933423	31.872	38.733	23.548	3.5654	1.0293	1.2521
C415G	SNV	chr3:49933423	62.417	12.95	19.231	3.4943	1.2124	0.69455
C415A	SNV	chr3:49933423	71.267	3.82	14.071	6.6908	2.8398	1.312
A416T	SNV	chr3:49933422	63.766	8.8403	18.1	6.1224	1.6678	1.5035
A416G	SNV	chr3:49933422	61.995	10.186	18.861	5.0352	2.5742	1.3487
A416C	SNV	chr3:49933422	37.095	34.966	22.194	2.9515	1.9115	0.88214
G417T	SNV	chr3:49933421	65.159	7.2319	17.761	6.5194	1.9828	1.3458
G417C	SNV	chr3:49933421	62.536	5.5706	21.412	5.1405	3.2103	2.1302
G417A	SNV	chr3:49933421	64.938	6.947	18.701	5.9309	2.1708	1.3132
C418T	SNV	chr3:49933420	55.382	15.545	20.864	4.5013	1.7115	1.9966
C418G	SNV	chr3:49933420	39.144	35.806	12.624	1.9373	1.0692	9.4194
C418A	SNV	chr3:49933420	57.699	9.0155	25.03	2.622	2.6423	2.9912
CT419C	DEL	chr3:49933420	56.078	5.5234	28.048	7.9133	1.4168	1.0213
T419G	SNV	chr3:49933419	64.117	5.7475	17.182	8.5477	2.7667	1.6394
T419C	SNV	chr3:49933419	69.373	4.3675	15.192	6.12	2.8742	2.074
T419A	SNV	chr3:49933419	67.756	5.169	17.486	5.7332	2.1404	1.7151
T420C	SNV	chr3:49933418	70.955	3.9725	16.555	4.6348	2.2177	1.6644
T420A	SNV	chr3:49933418	35.553	41.863	17.361	2.7728	1.1064	1.3435
TG421T	DEL	chr3:49933418	60.348	9.3627	19.592	5.7923	1.7167	3.1881
G421T	SNV	chr3:49933417	56.796	11.003	22.575	5.1294	1.2776	3.2199
G421A	SNV	chr3:49933417	28.652	37.443	23.369	2.739	0.97473	6.8225
G422T	SNV	chr3:49933416	63.611	7.9057	16.317	6.9116	1.9436	3.3114
G422C	SNV	chr3:49933416	62.352	7.0173	21.091	4.8187	1.7567	2.9647
GC423G	DEL	chr3:49933416	50.555	18.585	21.895	4.4495	2.7617	1.7534
C423T	SNV	chr3:49933415	54.415	14.197	22.223	4.3719	1.4281	3.3647
C423G	SNV	chr3:49933415	37.467	29.442	27.425	1.9514	1.7319	1.9826
C423A	SNV	chr3:49933415	67.43	3.6194	17.078	5.5001	2.9319	3.441
C424T	SNV	chr3:49933414	46.087	23.078	22.634	3.3973	1.5497	3.2537
C424G	SNV	chr3:49933414	62.813	5.3844	20.122	4.1443	2.6172	4.919
C424A	SNV	chr3:49933414	43.859	22.696	24.189	2.0104	1.4002	5.8459
A425T	SNV	chr3:49933413	60.98	6.1637	17.766	6.44	2.4983	6.1528
A425G	SNV	chr3:49933413	43.548	23.138	26.268	3.5324	1.4311	2.0826
A425C	SNV	chr3:49933413	71.74	4.1988	14.558	5.8085	1.8284	1.8664
G426A	SNV	chr3:49933412	60.92	7.6601	17.436	5.9844	2.2006	5.7996
G427T	SNV	chr3:49933411	40.482	30.759	21.85	2.0095	1.2033	3.6962
G427C	SNV	chr3:49933411	53.579	16.16	21.138	5.2059	0.92105	2.9966
G427A	SNV	chr3:49933411	47.969	19.568	25.8	3.7276	0.67313	2.262
GA428G	DEL	chr3:49933411	50.166	21.362	21.462	4.64	0.75324	1.617
A428G	SNV	chr3:49933410	33.649	39.137	22.391	2.9072	1.0987	0.81701
A428C	SNV	chr3:49933410	42.257	26.103	25.532	2.9746	1.7857	1.3481
T429C	SNV	chr3:49933409	71.793	4.5879	14.261	4.9703	2.0902	2.2972
T429A	SNV	chr3:49933409	59.836	10.19	20.833	4.8245	2.504	1.8126
TG430T	DEL	chr3:49933409	58.293	6.3703	19.983	6.8355	2.3254	6.1924
G430T	SNV	chr3:49933408	55.388	9.4817	22.258	4.8851	2.375	5.6123
G430A	SNV	chr3:49933408	42.625	24.222	25.889	3.8756	1.5098	1.8793
G431T	SNV	chr3:49933407	61.03	7.8872	18.627	7.3461	2.57	2.5405
G431C	SNV	chr3:49933407	66.321	5.4256	18.154	2.8851	4.1712	3.0439
G431A	SNV	chr3:49933407	69.15	3.2341	15.185	7.301	3.1525	1.9776
T432G	SNV	chr3:49933406	61.382	12.324	17.501	6.4115	1.272	1.1093
T432C	SNV	chr3:49933406	67.983	4.6932	16.446	6.3681	2.8621	1.648
T432A	SNV	chr3:49933406	73.099	2.7117	14.264	6.2139	2.5138	1.1972
G433T	SNV	chr3:49933405	57.416	7.8504	17.496	4.2423	1.3788	11.617
G433C	SNV	chr3:49933405	63.43	4.0181	21.264	4.9473	2.3585	3.9817
G433A	SNV	chr3:49933405	59.637	6.9535	22.211	6.6434	1.7084	2.8464
GC434G	DEL	chr3:49933405	60.88	7.3435	22.224	5.3872	2.3079	1.8572
C434T	SNV	chr3:49933404	57.477	8.0679	20.26	5.4174	1.327	7.4508
C434G	SNV	chr3:49933404	48.685	17.485	27.301	3.4434	1.965	1.121
C434A	SNV	chr3:49933404	75.305	3.7677	13.696	3.3648	2.2291	1.6374
C435T	SNV	chr3:49933403	72.893	3.6571	11.221	3.9689	1.7706	6.4888
C435A	SNV	chr3:49933403	69.959	2.8969	13.915	7.9245	3.454	1.8501
C436T	SNV	chr3:49933402	62.136	7.0176	18.938	5.8352	2.0096	4.0638
C436A	SNV	chr3:49933402	71.42	4.0083	15.799	4.7336	3.3283	0.7109
C437T	SNV	chr3:49933401	65.412	7.7716	17.661	5.0975	1.3597	2.698
C437G	SNV	chr3:49933401	68.347	4.5969	15.625	5.9312	2.562	2.9378
C437A	SNV	chr3:49933401	65.245	4.6766	21.595	5.3738	2.1701	0.93987
CA438C	DEL	chr3:49933401	25.047	23.686	35.525	4.6813	5.5915	5.4695
A438T	SNV	chr3:49933400	62.777	8.8022	18.937	4.451	2.3202	2.7127
A438G	SNV	chr3:49933400	61.419	9.6092	20.066	5.4794	1.8582	1.5686
A438C	SNV	chr3:49933400	57.894	14.634	19.344	5.3073	1.1381	1.6826
A438AT	IN	chr3:49933400	55.947	11.634	18.891	5.8515	1.7999	5.8768
AT439A	DEL	chr3:49933400	53.79	9.5057	24.535	6.6918	3.5682	1.9095
T439C	SNV	chr3:49933399	59.283	12.013	21.285	3.5328	2.8244	1.0614
T439A	SNV	chr3:49933399	71.926	4.9724	13.722	5.0403	2.8045	1.5348
T440G	SNV	chr3:49933398	72.94	7.3568	10.839	4.483	2.0469	2.3335
T440C	SNV	chr3:49933398	71.416	5.4104	14.132	4.4517	3.162	1.4277
T440A	SNV	chr3:49933398	58.423	10.152	22.766	4.4478	3.1563	1.0544
G441T	SNV	chr3:49933397	63.96	5.3526	21.531	4.6155	2.4397	2.1013
G441C	SNV	chr3:49933397	64.576	7.8199	19.743	3.4881	2.3434	2.0297
G441A	SNV	chr3:49933397	63.11	5.6842	21.795	4.7976	2.1128	2.4999
C442T	SNV	chr3:49933396	22.924	49.955	22.549	2.0096	0.92313	1.6394
C442G	SNV	chr3:49933396	27.48	48.691	21.06	0.90461	1.1978	0.66633
C442A	SNV	chr3:49933396	74.747	4.2301	14.105	4.0777	1.6606	1.1793
A443T	SNV	chr3:49933395	9.7538	72.269	15.99	0.68711	0.44233	0.8585
A443G	SNV	chr3:49933395	6.6274	77.335	14.218	0.5111	0.32935	0.9789
A443C	SNV	chr3:49933395	5.6198	86.714	6.4974	0.66764	0.12699	0.37388
AG444A	DEL	chr3:49933395	0.68617	86.574	11.404	0.020875	0.37502	0.93949
G444T	SNV	chr3:49933394	1.1175	84.307	13.384	0.059782	0.19155	0.93988
G444C	SNV	chr3:49933394	0.6018	94.657	4.2244	0.051177	0.046712	0.419
G444A	SNV	chr3:49933394	3.5966	81.749	13.182	0.23099	0.3855	0.85644
G445C	SNV	chr3:49933393	1.0767	80.647	15.981	0.05588	0.15346	2.0864
G445A	SNV	chr3:49933393	0.92964	84.323	13.88	0.057989	0.20294	0.6063
T446C	SNV	chr3:49933392	0.6943	84.142	13.895	0.046685	0.1702	1.0521
T446A	SNV	chr3:49933392	5.4459	66.556	22.551	0.22442	0.94003	4.2828
TA447T	DEL	chr3:49933392	0.6177	70.562	22.031	0.044623	0.55175	6.1925
A447T	SNV	chr3:49933391	4.1225	75.872	14.255	0.23739	0.18725	5.3257
A447G	SNV	chr3:49933391	4.1436	80.014	14.066	0.34605	0.28176	1.1485
G448T	SNV	chr3:49933390	58.16	7.8334	19.938	5.5211	1.6921	6.8558
G448A	SNV	chr3:49933390	75.978	0.94843	10.303	8.6583	2.6728	1.4393
G449T	SNV	chr3:49933389	11.812	66.226	18.781	1.3207	0.44099	1.4194
G449A	SNV	chr3:49933389	13.123	63.599	17.862	1.0161	0.59316	3.8075
C450T	SNV	chr3:49933388	73.957	3.2711	13.164	5.6262	2.5874	1.3941
C450A	SNV	chr3:49933388	64.663	5.685	17.821	6.5592	2.3525	2.9188
A451T	SNV	chr3:49933387	68.877	4.4526	17.668	4.8211	1.9547	2.2276
A451G	SNV	chr3:49933387	62.545	10.931	17.894	4.2813	1.7945	2.5542
A451C	SNV	chr3:49933387	70.344	5.0189	12.581	6.937	2.9484	2.1702
G452T	SNV	chr3:49933386	67.518	4.7971	18.997	3.1657	3.1508	2.3712
G452A	SNV	chr3:49933386	66.526	4.3681	18.637	6.3555	2.4964	1.6164
GC453G	DEL	chr3:49933386	51.62	10.978	26.149	4.9338	3.4573	2.8626
C453T	SNV	chr3:49933385	64.041	8.5224	18.946	4.15	2.6427	1.6979
C453G	SNV	chr3:49933385	61.855	8.9021	22.314	4.4192	1.8586	0.65157
C453A	SNV	chr3:49933385	56.558	11.412	21.328	4.7971	2.026	3.8793
C454T	SNV	chr3:49933384	56.875	12.813	21.295	5.4048	1.6798	1.9321
C454G	SNV	chr3:49933384	60.682	8.7782	22.331	3.1223	1.0403	4.0455
C454A	SNV	chr3:49933384	59.793	7.2313	22.23	5.7254	2.3389	2.6811
C455T	SNV	chr3:49933383	56.63	10.975	20.835	7.6035	1.7705	2.1866
C455CA	IN	chr3:49933383	61.767	5.3593	24.358	3.4789	2.9493	2.0878
CA456C	DEL	chr3:49933383	50.61	5.3895	30.87	4.1865	1.7457	7.1987
A456T	SNV	chr3:49933382	67.6	6.9638	16.002	5.6173	2.2626	1.555
A456G	SNV	chr3:49933382	63.386	5.9603	19.634	5.6634	2.1356	3.2206
A456C	SNV	chr3:49933382	66.08	4.4087	16.537	6.5761	2.7954	3.6021
G457T	SNV	chr3:49933381	67.034	6.0413	16.771	6.1249	1.9116	2.1173
G457C	SNV	chr3:49933381	59.814	13.923	17.493	5.1481	1.6746	1.9474
G457A	SNV	chr3:49933381	66.695	5.6132	17.569	4.619	3.075	2.4287
C458T	SNV	chr3:49933380	69.358	5.2989	15.962	4.9081	2.9888	1.4838
C458G	SNV	chr3:49933380	61.461	1.4172	25.457	4.7185	4.6192	2.3269
C458A	SNV	chr3:49933380	64.009	4.6415	20.476	5.7347	3.2139	1.9243
T459G	SNV	chr3:49933379	70.233	5.3459	13.141	8.4275	1.4796	1.3732
T459C	SNV	chr3:49933379	64.649	7.0133	19.642	5.0248	1.7503	1.9208
T459A	SNV	chr3:49933379	61.009	12.839	17.726	5.0119	1.8983	1.5158
TG460T	DEL	chr3:49933379	39.348	35.819	20.273	2.9295	0.79522	0.83533
G460T	SNV	chr3:49933378	52.276	20.064	20.629	3.708	1.7708	1.5521
G460C	SNV	chr3:49933378	22.455	34.53	31.195	4.3879	2.6887	4.7434
G460A	SNV	chr3:49933378	26.865	46.451	22.544	2.1746	0.96058	1.0042
G461T	SNV	chr3:49933377	55.241	17.765	20.536	4.1439	1.331	0.98363
G461C	SNV	chr3:49933377	10.937	57.722	27.819	0.94595	2.5326	0.043362
G461A	SNV	chr3:49933377	51.602	22.326	18.586	3.9682	1.7228	1.7951
A462T	SNV	chr3:49933376	68.389	8.1063	14.477	6.049	1.6476	1.3312
A462G	SNV	chr3:49933376	60.106	11.048	20.317	4.1816	2.9437	1.4032
A462C	SNV	chr3:49933376	60.294	23.663	9.5033	3.0843	1.0715	2.3833
AC463A	DEL	chr3:49933376	58.383	14.205	18.377	3.727	1.9753	3.3325
C463T	SNV	chr3:49933375	68.169	4.392	16.936	6.9765	1.9151	1.6108
C463G	SNV	chr3:49933375	69.898	11.862	9.477	2.5188	4.0439	2.2003
C464T	SNV	chr3:49933374	62.369	4.5609	22.065	6.7991	2.2603	1.946
C464G	SNV	chr3:49933374	63.634	10.727	15.642	3.6853	2.0114	4.3
C464A	SNV	chr3:49933374	67.138	5.0097	18.325	4.925	2.3985	2.2041
CT465C	DEL	chr3:49933374	55.41	16.055	19.558	5.1611	2.3715	1.4446
T465G	SNV	chr3:49933373	62.348	5.6823	20.736	4.8553	2.5024	3.8763
T465C	SNV	chr3:49933373	60.886	11.575	19.203	4.6295	2.0846	1.6213
T465A	SNV	chr3:49933373	58.547	8.4869	22.761	4.9539	2.1877	3.0641
TC466T	DEL	chr3:49933373	53.811	12.03	24.113	5.0501	3.185	1.8101
C466T	SNV	chr3:49933372	53.214	13.564	22.389	4.7167	2.6633	3.4522
C466G	SNV	chr3:49933372	23.884	49.954	18.405	3.585	2.0826	2.0892
C466A	SNV	chr3:49933372	33.638	33.476	26.311	2.9069	1.1295	2.5381
C467T	SNV	chr3:49933371	39.269	34.424	20.233	2.5653	1.6319	1.8766
C467G	SNV	chr3:49933371	21.456	43.032	30.931	0.44932	3.2194	0.91215
C467A	SNV	chr3:49933371	39.443	25.889	29.461	2.3876	1.3128	1.5063
C468T	SNV	chr3:49933370	64.81	8.2703	17.709	4.8196	1.7534	2.6372
C468G	SNV	chr3:49933370	50.158	14.753	25.456	2.3328	1.1054	6.1952
C468A	SNV	chr3:49933370	47.364	18.086	23.901	3.1695	1.5825	5.8971
CT469C	DEL	chr3:49933370	57.261	6.8318	26.243	5.0341	1.85	2.781
T469G	SNV	chr3:49933369	55.104	10.681	19.622	9.6005	2.894	2.0984
T469C	SNV	chr3:49933369	65.519	8.8943	18.144	3.7764	2.0346	1.6318
T469A	SNV	chr3:49933369	57.816	10.713	22.814	4.472	2.2979	1.8871
T469TG	IN	chr3:49933369	62.985	12.848	16.171	3.9672	2.9922	1.0369
TG470T	DEL	chr3:49933369	50.554	8.3561	30.506	4.4467	2.3967	3.7408
G470T	SNV	chr3:49933368	58.009	5.0227	24.672	4.9065	2.6207	4.7683
G470C	SNV	chr3:49933368	52.266	7.4122	26.882	3.861	3.1166	6.4624
G470A	SNV	chr3:49933368	47.874	11.811	30.979	4.5123	2.4822	2.3415
G471T	SNV	chr3:49933367	47.099	17.789	28.085	3.7731	2.1255	1.1286
G471C	SNV	chr3:49933367	41.664	19.62	29.773	4.7045	1.6099	2.6279
G471A	SNV	chr3:49933367	49.326	12.992	28.486	4.5745	2.3823	2.239
G472A	SNV	chr3:49933366	49.396	9.6626	30.043	3.3896	2.3378	5.1714
GA473G	DEL	chr3:49933366	59.575	11.059	19.772	5.0126	2.0089	2.5727
A473T	SNV	chr3:49933365	62.527	6.9191	22.572	4.7798	2.0502	1.1516
A473G	SNV	chr3:49933365	63.801	9.9733	16.9	4.9906	2.0384	2.2968
A473C	SNV	chr3:49933365	55.702	10.557	26.565	1.7168	4.7534	0.70585
A474T	SNV	chr3:49933364	68.27	6.0831	16.671	4.5479	2.41	2.0178
A474G	SNV	chr3:49933364	63.975	6.3136	19.786	5.3977	1.9332	2.5944
A474C	SNV	chr3:49933364	52.326	12.378	23.341	7.7397	1.9498	2.2652
A475T	SNV	chr3:49933363	59.858	8.0708	20.886	5.5562	2.6082	3.02
A475G	SNV	chr3:49933363	64.408	5.9471	19.349	5.5401	2.3479	2.4086
C476T	SNV	chr3:49933362	65.522	6.3397	18.7	5.2278	2.1844	2.0263
C476G	SNV	chr3:49933362	65.872	6.7085	17.178	5.0625	2.4808	2.698
C476A	SNV	chr3:49933362	70.702	6.7772	12.401	6.8706	1.4445	1.8046
C476CA	IN	chr3:49933362	75.304	5.0265	13.211	2.7248	1.596	2.1377
A477T	SNV	chr3:49933361	62.229	7.7489	21.594	4.2464	2.0338	2.148
A477G	SNV	chr3:49933361	66.774	6.3901	16.76	5.7366	2.3941	1.9458
AC478A	DEL	chr3:49933361	70.776	7.5226	15.439	4.1096	1.08	1.0729
C478T	SNV	chr3:49933360	67.015	6.5313	18.088	4.7904	2.0672	1.5082
C478G	SNV	chr3:49933360	65.852	11.518	13.94	4.9544	2.3461	1.3889
C478A	SNV	chr3:49933360	72.818	9.1309	11.973	2.778	2.113	1.1875
CG479C	DEL	chr3:49933360	45.634	23.097	22.532	3.7856	1.4362	3.5159
G479T	SNV	chr3:49933359	47.283	14.651	27.212	3.7131	3.0941	4.0463
G479A	SNV	chr3:49933359	49.147	13.746	27.822	3.9902	2.7689	2.5263
G480T	SNV	chr3:49933358	41.537	19.385	27.033	3.3989	2.2429	6.403
G480A	SNV	chr3:49933358	42.313	15.145	27.043	4.0138	3.7551	7.7293
G481T	SNV	chr3:49933357	48.366	13.657	27.861	1.5335	2.9636	5.6195
G481C	SNV	chr3:49933357	47.525	3.817	34.99	9.454	3.4081	0.80644
C482T	SNV	chr3:49933356	70.537	5.0848	15.087	6.873	1.3142	1.1048
C482G	SNV	chr3:49933356	53.42	5.5163	27.057	10.212	0.53785	3.257
C482A	SNV	chr3:49933356	73.878	6.7123	9.4434	4.4704	2.3058	3.1901
A483T	SNV	chr3:49933355	68.23	4.4478	18.432	4.9993	2.2669	1.6238
A483G	SNV	chr3:49933355	72.698	4.487	12.687	6.5329	2.1228	1.4726
A483C	SNV	chr3:49933355	89.011	0.29784	5.8231	3.2793	1.3529	0.2355
G484T	SNV	chr3:49933354	63.949	7.6596	19.009	5.1976	2.1249	2.0599
G484C	SNV	chr3:49933354	64.615	1.8057	24.421	3.689	4.4787	0.99023
G484A	SNV	chr3:49933354	63.597	6.5215	17.29	5.777	1.9711	4.8441
A485T	SNV	chr3:49933353	68.674	7.099	15.648	4.2871	2.0322	2.2601
A485G	SNV	chr3:49933353	69.939	7.0476	13.209	6.4767	1.6497	1.6781
A485C	SNV	chr3:49933353	61.873	5.3952	22.459	5.1164	2.1656	2.9906
G486T	SNV	chr3:49933352	65.827	9.7885	16.486	3.729	1.8043	2.3656
G486A	SNV	chr3:49933352	60.043	6.0079	22.649	5.4568	1.8793	3.9641
G487T	SNV	chr3:49933351	62.649	4.7969	22.893	5.2967	2.0604	2.3042
G487A	SNV	chr3:49933351	54.264	5.6455	30.902	4.7691	2.0702	2.3491
G488T	SNV	chr3:49933350	65.689	9.708	13.146	9.1547	1.5963	0.70625
G488C	SNV	chr3:49933350	57.659	7.3679	25.434	4.7766	2.7808	1.9821
G488A	SNV	chr3:49933350	60.344	7.467	19.744	5.1614	2.5648	4.7193
C489T	SNV	chr3:49933349	70.437	7.5404	13.328	4.9367	2.5046	1.2539
C490T	SNV	chr3:49933348	71.214	7.2926	12.494	5.4583	1.3242	2.2176
C490A	SNV	chr3:49933348	65.133	8.4749	16.018	6.1472	2.1272	2.0994
CT491C	DEL	chr3:49933348	30.682	24.078	9.2456	30.909	1.9655	3.1198
T491G	SNV	chr3:49933347	68.392	3.2592	16.34	4.8678	2.9429	4.1984
T491C	SNV	chr3:49933347	62.566	6.7312	19.759	5.0521	2.5894	3.3019
T491A	SNV	chr3:49933347	63.093	6.6641	20.115	5.8813	2.7368	1.5099
A492T	SNV	chr3:49933346	64.027	7.2083	18.416	6.512	1.7432	2.0929
A492G	SNV	chr3:49933346	60.847	6.2337	18.991	5.4838	3.5033	4.9414
A492C	SNV	chr3:49933346	70.626	4.1882	16.452	4.4998	2.2844	1.9497
C493T	SNV	chr3:49933345	64.752	6.2845	19.705	5.4623	2.104	1.6913
C493G	SNV	chr3:49933345	69.818	5.9323	13.995	4.3098	2.3466	3.5975
C493A	SNV	chr3:49933345	63.789	8.8022	15.715	8.4724	1.2056	2.0163
A494T	SNV	chr3:49933344	62.847	5.9299	20.95	5.5931	2.9221	1.7576
A494G	SNV	chr3:49933344	66.172	5.4541	18.075	6.1698	2.0084	2.1208
A494C	SNV	chr3:49933344	65.54	8.6496	15.639	5.108	2.2285	2.8353
G495T	SNV	chr3:49933343	61.864	7.7441	20.403	4.969	2.3317	2.6879
G495A	SNV	chr3:49933343	68.895	6.1463	15.561	4.388	2.3126	2.697
G496T	SNV	chr3:49933342	59.705	5.9971	21.945	6.3864	2.9536	3.0125
G496C	SNV	chr3:49933342	64.579	7.0784	15.419	6.5588	2.8081	3.5562
G496A	SNV	chr3:49933342	64.292	8.0979	17.266	5.3439	1.9018	3.0983
C497T	SNV	chr3:49933341	57.038	4.5153	24.744	3.2241	6.6929	3.7852
C497G	SNV	chr3:49933341	55.892	4.8751	27.473	3.609	5.4755	2.6744
C497A	SNV	chr3:49933341	67.913	4.3116	16.007	4.9975	2.9369	3.8336
T498G	SNV	chr3:49933340	63.022	5.0698	22.396	3.9934	2.774	2.7445
T498C	SNV	chr3:49933340	53.323	5.7804	31.201	5.1093	2.8923	1.6949
T498A	SNV	chr3:49933340	64.718	5.9868	17.608	7.246	2.2391	2.202
G499T	SNV	chr3:49933339	60.228	5.2126	23.344	6.5827	3.0945	1.5378
G499A	SNV	chr3:49933339	59.974	6.443	20.345	7.8085	2.3999	3.0299
G500T	SNV	chr3:49933338	65.613	8.6464	16.17	6.3722	1.3019	1.8968
G500C	SNV	chr3:49933338	67.133	4.6563	17.741	5.1952	3.2476	2.0271
G500A	SNV	chr3:49933338	61.317	13.234	16.015	5.8753	2.1836	1.3756
G501T	SNV	chr3:49933337	67.413	8.2404	13.707	8.4865	1.3223	0.83143
G501C	SNV	chr3:49933337	46.72	9.9757	27.69	7.5341	3.7662	4.3141
G501A	SNV	chr3:49933337	65.343	8.4524	15.382	5.9694	2.1432	2.7095
C502T	SNV	chr3:49933336	75.681	7.1103	9.2287	5.4618	1.5046	1.014
C502A	SNV	chr3:49933336	73.38	7.125	9.7644	7.6064	0.97587	1.1485
C503T	SNV	chr3:49933335	56.873	5.275	27.69	2.1668	4.1506	3.8446
C503A	SNV	chr3:49933335	36.322	4.0652	42.64	2.1813	8.8123	5.9792
G505T	SNV	chr3:49933333	58.917	6.9578	25.221	3.8948	2.8576	2.1509
G505A	SNV	chr3:49933333	65.995	7.0801	16.864	6.3548	2.1659	1.5399
A506T	SNV	chr3:49933332	4.3127	32.291	44.741	0.099914	9.9583	8.597
G507T	SNV	chr3:49933331	73.152	5.1526	10.808	9.0172	0.95818	0.91241
G507C	SNV	chr3:49933331	70.497	11.875	9.8201	4.616	2.0889	1.1034
G507A	SNV	chr3:49933331	66.186	9.9822	13.763	6.4323	2.0026	1.6337
GT508G	DEL	chr3:49933331	50.626	4.1827	28.725	4.1065	4.8857	7.4746
T508C	SNV	chr3:49933330	63.169	5.4871	20.261	5.4912	3.4522	2.1398
T508A	SNV	chr3:49933330	60.192	7.7715	22.018	3.7518	3.1006	3.1664
T509C	SNV	chr3:49933329	61.822	6.8105	20.156	4.7616	3.0693	3.3807
T509A	SNV	chr3:49933329	60.267	5.6275	23.045	4.2417	3.6679	3.1502
G510T	SNV	chr3:49933328	74.927	7.8059	8.3455	7.3011	0.98992	0.63027
G510C	SNV	chr3:49933328	55.604	9.5007	23.587	6.8823	2.9735	1.4519
G510A	SNV	chr3:49933328	67.191	7.1569	16.376	5.4294	2.2042	1.6427
GC511G	DEL	chr3:49933328	40.717	30.828	17.917	3.7159	4.3527	2.4681
C511T	SNV	chr3:49933327	72.407	7.9831	10.848	5.7321	1.2696	1.7602
C511G	SNV	chr3:49933327	61.131	4.7262	21.421	3.93	5.778	3.0143
C511A	SNV	chr3:49933327	66.602	6.5589	14.107	8.1416	1.9521	2.6389
C512T	SNV	chr3:49933326	69.772	7.3485	13.009	5.9211	1.6169	2.3323
C512A	SNV	chr3:49933326	66.54	7.2374	15.777	4.5822	2.2508	3.6127
CA513C	DEL	chr3:49933326	46.752	4.2575	34.375	2.7464	5.0644	6.805
A513T	SNV	chr3:49933325	69.574	8.5471	13.873	5.4978	1.3371	1.1714
A513G	SNV	chr3:49933325	62.319	6.6531	19.625	5.5607	2.6378	3.2049
C514T	SNV	chr3:49933324	72.086	9.1589	10.235	5.9786	1.3889	1.1529
C514A	SNV	chr3:49933324	58.95	8.8847	20.631	6.9814	1.1816	3.3715
C515T	SNV	chr3:49933323	69.085	12.339	11.156	5.1502	1.3118	0.95809
C515G	SNV	chr3:49933323	8.4353	56.882	32.045	0.35209	1.4094	0.87591
C515A	SNV	chr3:49933323	62.89	7.1075	19.223	5.8851	2.258	2.6365
T516G	SNV	chr3:49933322	17.225	6.2352	54.348	1.0398	14.733	6.4196
T516C	SNV	chr3:49933322	63.197	6.553	20.379	5.1546	2.4101	2.3058
G517T	SNV	chr3:49933321	67.82	13.362	8.1356	8.1659	1.5498	0.96702
G517C	SNV	chr3:49933321	67.255	11.41	13.651	5.1246	1.2258	1.3332
G517A	SNV	chr3:49933321	66.659	8.022	16.493	5.3867	1.8154	1.6243
G517GC	IN	chr3:49933321	70.265	8.4376	12.34	5.4177	1.7148	1.8254
G517GA	IN	chr3:49933321	67.764	5.8729	13.553	5.8729	2.4496	4.4875
GC518G	DEL	chr3:49933321	43.673	2.1096	38.057	1.949	7.8758	6.336
C518T	SNV	chr3:49933320	67.763	9.7328	13.268	6.2571	1.3048	1.6735
C519T	SNV	chr3:49933319	59.852	4.5172	26.162	3.5466	2.8005	3.1216
C519A	SNV	chr3:49933319	39.499	4.0018	41.946	3.2357	5.3379	5.9791
C520T	SNV	chr3:49933318	63.136	7.5742	18.004	6.8629	1.9091	2.5137
C520A	SNV	chr3:49933318	57.996	4.6439	26.866	3.8191	3.1889	3.4867
C521T	SNV	chr3:49933317	65.088	6.2723	18.822	5.2908	2.3342	2.192
C521G	SNV	chr3:49933317	69.792	8.7093	12.395	6.5597	0.6093	1.9343
C521A	SNV	chr3:49933317	66.164	11.326	11.354	8.4979	1.6691	0.98906
C522T	SNV	chr3:49933316	69.39	8.2182	14.597	4.908	1.981	0.90643
G525C	SNV	chr3:49933313	50.968	2.4538	28.155	6.2123	3.6134	8.5971
G525A	SNV	chr3:49933313	61.442	2.6654	23.128	2.8899	4.6021	5.2725
T526C	SNV	chr3:49933312	48.188	3.5219	35.486	1.4695	5.8404	5.4945
C527T	SNV	chr3:49933311	57.504	5.7066	26.835	4.5756	3.9986	1.38
C527G	SNV	chr3:49933311	48.57	2.3564	36.652	2.3281	7.5479	2.5449
C527A	SNV	chr3:49933311	62.19	2.9519	25.063	2.7417	4.7194	2.3345
T528G	SNV	chr3:49933310	54.724	9.8411	23.431	4.0705	3.6562	4.2764
T528C	SNV	chr3:49933310	66.286	5.9219	19.128	4.6541	2.1893	1.8207
T528A	SNV	chr3:49933310	49.083	4.6237	35.766	4.3784	3.2727	2.8758
G529T	SNV	chr3:49933309	66.775	6.9847	18.044	4.4878	1.7301	1.9784
G529C	SNV	chr3:49933309	73.527	5.5047	10.372	4.6024	2.4319	3.5624
G529A	SNV	chr3:49933309	59.025	7.9057	23.043	6.1262	2.1246	1.776
C530T	SNV	chr3:49933308	58.5	4.1455	26.042	4.7898	4.2106	2.312
C530G	SNV	chr3:49933308	42.634	1.2531	34.601	1.5314	12.391	7.5899
C530A	SNV	chr3:49933308	32.832	1.7801	49.587	1.24	4.5379	10.023
G531T	SNV	chr3:49933307	50.575	8.0211	32.664	0.51543	6.7162	1.5084
G531C	SNV	chr3:49933307	70.968	13.022	12.342	1.4799	1.5423	0.64509
G531A	SNV	chr3:49933307	63.742	7.5946	19.795	4.3739	2.2329	2.2619
T532G	SNV	chr3:49933306	64.177	10.342	14.067	5.9772	1.5619	3.8746
T532C	SNV	chr3:49933306	66.108	10.862	12.874	5.3479	1.6625	3.1447
T532A	SNV	chr3:49933306	55.078	9.7967	18.507	12.722	0.99646	2.9
A533T	SNV	chr3:49933305	65.663	7.6292	14.916	6.1047	1.6398	4.0475
A533G	SNV	chr3:49933305	62.318	9.1514	15.98	7.9297	1.8985	2.7225
G534T	SNV	chr3:49933304	62.547	8.318	19.518	3.019	3.7152	2.8824
G534C	SNV	chr3:49933304	71.277	7.7512	17.333	0.51285	2.1864	0.94025
G534A	SNV	chr3:49933304	63.952	4.5982	22.504	4.1946	3.2642	1.4875
A535T	SNV	chr3:49933303	57.569	4.8121	28.658	3.4427	3.5502	1.9682
A535G	SNV	chr3:49933303	66.007	5.7657	18.422	6.2943	2.1282	1.3828
T536C	SNV	chr3:49933302	64.512	8.2215	18.457	4.4247	2.0144	2.3705
T536A	SNV	chr3:49933302	64.918	4.7098	21.318	3.0658	3.6153	2.3728
TG537T	DEL	chr3:49933302	68.848	10.432	12.771	3.4629	2.5268	1.9591
G537T	SNV	chr3:49933301	54.238	5.2201	27.84	5.2416	3.98	3.4799
G537C	SNV	chr3:49933301	67.73	6.5689	17.23	4.3069	2.2519	1.9121
G537A	SNV	chr3:49933301	41.093	2.7453	43.665	2.7949	7.2882	2.4137
G538T	SNV	chr3:49933300	63.581	5.234	21.313	4.2714	3.3912	2.2092
G538C	SNV	chr3:49933300	65.323	6.8592	17.84	6.057	1.9053	2.0156
G538A	SNV	chr3:49933300	63.358	5.5976	21.263	4.9406	2.8973	1.9439
T539G	SNV	chr3:49933299	65.846	3.7284	26.403	1.7004	1.9951	0.32745
T539C	SNV	chr3:49933299	64.417	8.0654	17.106	6.686	1.903	1.8227
T539A	SNV	chr3:49933299	61.238	10.053	20.07	4.3323	2.233	2.0744
G540T	SNV	chr3:49933298	57.058	2.3008	31.662	2.7701	5.162	1.0474
G540A	SNV	chr3:49933298	45.212	3.4209	37.579	3.3336	6.8951	3.5592
A541T	SNV	chr3:49933297	62.621	5.0866	23.097	5.3134	2.6541	1.2275
A541G	SNV	chr3:49933297	65.333	8.5197	16.851	5.6733	1.3559	2.2665
A541C	SNV	chr3:49933297	67.441	6.1382	17.382	4.6698	2.6491	1.7194
A542G	SNV	chr3:49933296	59.109	5.3849	23.807	4.2593	4.1559	3.284
T543G	SNV	chr3:49933295	64.03	12.576	16.474	4.3371	1.6998	0.88316
T543C	SNV	chr3:49933295	62.358	9.9942	13.267	9.2583	1.6133	3.5095
T543A	SNV	chr3:49933295	60.42	7.939	21.672	6.0768	2.0478	1.8442
G544T	SNV	chr3:49933294	55.886	4.022	24.609	5.6073	8.1863	1.6893
G544C	SNV	chr3:49933294	64.026	8.8655	17.061	6.3545	1.2694	2.4231
G544A	SNV	chr3:49933294	64.008	5.2453	21.156	5.1174	2.6093	1.864
T545G	SNV	chr3:49933293	59.439	9.8884	19.816	7.5812	1.7123	1.5638
T545C	SNV	chr3:49933293	64.936	7.2099	18.369	5.7485	2.0253	1.711
T545A	SNV	chr3:49933293	64.223	7.6041	18.22	6.198	1.76	1.9945
C546T	SNV	chr3:49933292	61.785	4.1251	22.691	4.9692	3.9191	2.5105
C546A	SNV	chr3:49933292	57.148	4.833	27.922	5.2087	3.2869	1.6012
A547T	SNV	chr3:49933291	64.285	5.0264	19.757	4.6493	3.0782	3.2036
A547G	SNV	chr3:49933291	66.288	7.9062	15.363	6.3064	1.7086	2.4278
A547C	SNV	chr3:49933291	67.085	9.1761	15.705	4.4686	1.2823	2.2836
T548C	SNV	chr3:49933290	64.766	8.7553	16.833	5.2812	2.013	2.3507
T548A	SNV	chr3:49933290	65.021	7.6941	18.674	4.2554	2.2068	2.1484
A549G	SNV	chr3:49933289	66.594	7.1899	17.968	4.897	1.5487	1.8031
A549C	SNV	chr3:49933289	67.576	3.2143	20.793	4.193	2.87	1.3531
AT550A	DEL	chr3:49933289	65.332	7.5824	19.613	2.6708	2.7094	2.0924
T550C	SNV	chr3:49933288	65.286	6.6254	18.916	5.1619	2.3381	1.6723
T550A	SNV	chr3:49933288	61.743	4.307	22.763	6.0718	3.2137	1.9014
TC551T	DEL	chr3:49933288	63.753	4.2224	22.177	5.0808	2.3222	2.445
C551T	SNV	chr3:49933287	59.89	4.5973	22.875	4.2259	3.5073	4.9044
C551G	SNV	chr3:49933287	57.235	8.2736	25.759	4.198	2.2193	2.3151
C551A	SNV	chr3:49933287	64.312	3.1805	21.902	4.4915	3.9164	2.1977
C552T	SNV	chr3:49933286	52.901	3.5028	27.176	5.0791	4.2658	7.0751
C552G	SNV	chr3:49933286	72.123	5.1171	14.483	5.1334	1.8381	1.3055
C552A	SNV	chr3:49933286	58.123	5.9244	26.766	4.6404	2.6527	1.8932
T553G	SNV	chr3:49933285	58.263	6.1981	20.525	10.616	2.1327	2.2656
T553C	SNV	chr3:49933285	67.401	6.5304	16.468	5.4628	2.0472	2.0912
T553A	SNV	chr3:49933285	63.724	5.5157	21.773	4.8335	2.3872	1.767
TG554T	DEL	chr3:49933285	69.313	10.648	10.45	4.2324	1.7268	3.6293
G554C	SNV	chr3:49933284	66.114	6.5261	15.1	6.1245	1.2249	4.9096
G555T	SNV	chr3:49933283	62.861	7.7143	13.701	5.5823	2.2192	7.9226
G555C	SNV	chr3:49933283	78.864	4.5566	7.5042	3.6778	1.8411	3.556
G555A	SNV	chr3:49933283	66.627	8.6221	14.177	6.8123	1.5654	2.1964
G556C	SNV	chr3:49933282	70.116	8.4918	12.708	5.6048	1.3879	1.6914
G556A	SNV	chr3:49933282	65.184	9.6941	12.349	8.297	1.5625	2.9132
GT557G	DEL	chr3:49933282	38.699	29.779	12.954	13.009	0.75334	4.8063
T557C	SNV	chr3:49933281	64.68	10.518	14.123	5.9389	1.685	3.0545
T557A	SNV	chr3:49933281	63.437	12.429	12.141	7.5378	1.3251	3.1307
A558T	SNV	chr3:49933280	66.007	7.0871	18.487	5.0664	1.4697	1.8826
A558G	SNV	chr3:49933280	62.89	8.4262	18.131	5.969	2.5074	2.0761
G559T	SNV	chr3:49933279	64.609	4.9653	19.646	4.6875	2.0931	3.9992
G559A	SNV	chr3:49933279	64.108	8.143	17.286	6.0721	2.0217	2.3692
A560T	SNV	chr3:49933278	65.999	5.1541	19.501	4.3823	2.3568	2.6066
A560C	SNV	chr3:49933278	61.646	4.3968	22.092	7.6516	2.3628	1.8511
G561C	SNV	chr3:49933277	58.072	8.2128	22.154	6.6766	1.9206	2.9639
G561A	SNV	chr3:49933277	64.112	5.8472	19.772	5.5024	2.6186	2.1481
T562C	SNV	chr3:49933276	63.707	9.5543	16.219	6.3742	1.7363	2.4089
T562A	SNV	chr3:49933276	68.654	6.216	16.58	5.1941	1.8237	1.5317
TG563T	DEL	chr3:49933276	80.025	5.3244	7.6182	3.2901	2.6482	1.0941
G563T	SNV	chr3:49933275	65.319	5.4199	18.345	5.4669	3.0338	2.4153
G563C	SNV	chr3:49933275	68.05	6.3695	14.348	9.6146	1.13	0.48858
G563A	SNV	chr3:49933275	57.834	3.431	30.313	3.6015	3.0916	1.729
G564C	SNV	chr3:49933274	66.879	12.674	11.769	3.351	1.3663	3.9609
G564A	SNV	chr3:49933274	61.487	11.235	16.454	5.7533	1.9575	3.113
T565G	SNV	chr3:49933273	47.239	1.6023	34.371	0.89668	14.593	1.2981
T565C	SNV	chr3:49933273	64.277	8.8462	16.427	5.9557	1.72	2.7745
T565A	SNV	chr3:49933273	68.441	5.6167	16.671	5.4896	2.0506	1.7317
G566T	SNV	chr3:49933272	21.465	35.829	29.01	7.1856	1.6523	4.8586
G566A	SNV	chr3:49933272	63.18	7.5087	21.881	3.8393	1.9087	1.6826
GC567G	DEL	chr3:49933272	60.046	4.7451	20.739	2.3947	11.3	0.77509
C567T	SNV	chr3:49933271	64.87	5.0384	21.172	4.3552	3.1828	1.3818
C567G	SNV	chr3:49933271	44.051	1.5116	40.482	1.8555	11.747	0.35238
C567A	SNV	chr3:49933271	49.874	11.233	25.413	5.5717	4.4649	3.4432
G568T	SNV	chr3:49933270	66.546	4.7863	17.225	7.3661	2.3394	1.7366
G568A	SNV	chr3:49933270	65.494	5.4279	18.475	6.6148	2.0755	1.9125
G569T	SNV	chr3:49933269	70.666	5.4838	15.124	4.6166	1.4077	2.7019
G569C	SNV	chr3:49933269	53.059	12.201	18.704	11.488	1.0306	3.5178
G569A	SNV	chr3:49933269	62.805	9.5772	17.524	5.7761	1.7985	2.5194
GC570G	DEL	chr3:49933269	69.685	8.3963	13.149	3.5923	1.5948	3.5822
C570T	SNV	chr3:49933268	52.472	4.2974	34.478	4.1963	3.1583	1.3979
C570G	SNV	chr3:49933268	48.365	0.70771	37.813	3.0169	7.7168	2.3808
C570A	SNV	chr3:49933268	59.974	5.7069	22.824	6.1857	2.2016	3.1074
C571T	SNV	chr3:49933267	63.781	2.9798	24.161	5.326	2.8573	0.89468
C571G	SNV	chr3:49933267	70.533	9.2756	12.725	3.4615	1.1417	2.8634
C571A	SNV	chr3:49933267	73.583	4.6284	12.714	5.1554	1.9008	2.0191
CA572C	DEL	chr3:49933267	64.507	14.921	10.111	5.2888	1.3272	3.8446
A572T	SNV	chr3:49933266	65.264	7.1815	15.76	7.3214	2.8163	1.6562
A572G	SNV	chr3:49933266	61.243	5.237	22.646	5.1867	3.9903	1.697
A572C	SNV	chr3:49933266	59.053	12.312	17.332	6.5599	2.3816	2.362
A572AG	IN	chr3:49933266	73.904	7.2055	5.7908	7.5085	3.6437	1.9479
AG573A	DEL	chr3:49933266	63.639	15.786	7.3171	4.0729	3.8948	5.2907
G573T	SNV	chr3:49933265	64.012	10.888	14.746	5.6972	2.2639	2.3923
G573A	SNV	chr3:49933265	66.409	8.1081	15.049	7.7549	1.1739	1.5048
G574T	SNV	chr3:49933264	66.602	7.5512	14.744	6.5198	1.725	2.8579
G574C	SNV	chr3:49933264	68.619	8.945	13.933	3.4241	1.2937	3.7852
G574A	SNV	chr3:49933264	62.814	11.802	13.65	6.8004	0.95074	3.9822
G575T	SNV	chr3:49933263	60.797	11.433	15.455	8.4357	1.3675	2.5115
G575C	SNV	chr3:49933263	63.679	8.4979	15.204	6.3314	2.3685	3.9194
G575A	SNV	chr3:49933263	65.893	8.0272	14.704	6.4067	1.5456	3.4238
GC576G	DEL	chr3:49933263	75.727	3.4515	13.15	1.6329	4.6128	1.4262
C576T	SNV	chr3:49933262	62.752	5.4549	23.501	3.7469	2.5529	1.9924
C576G	SNV	chr3:49933262	62.729	5.9291	20.786	4.2296	4.7207	1.6054
C576A	SNV	chr3:49933262	64.361	5.1297	20.935	5.321	1.7781	2.4754
C577T	SNV	chr3:49933261	53.194	3.7235	34.069	3.8625	4.0013	1.1498
C577G	SNV	chr3:49933261	36.747	24.931	26.63	7.8108	2.4546	1.4277
C577A	SNV	chr3:49933261	61.148	5.4452	23.193	6.2138	2.2762	1.7238
A578T	SNV	chr3:49933260	65.534	7.1078	18.001	5.2498	2.3947	1.7119
A578G	SNV	chr3:49933260	66.72	8.8065	14.74	5.9066	1.7844	2.0418
A578C	SNV	chr3:49933260	55.685	15.152	18.32	5.0752	2.7235	3.0441
G579T	SNV	chr3:49933259	65.445	6.1036	19.062	4.2756	3.0209	2.0926
G579C	SNV	chr3:49933259	70.29	5.9505	13.895	4.7632	1.6871	3.4148
G579A	SNV	chr3:49933259	54.777	5.6564	29.086	5.2385	3.4818	1.7603
A580T	SNV	chr3:49933258	65.004	5.7302	20.68	4.1471	2.5752	1.8634
A580G	SNV	chr3:49933258	57.802	4.0383	28.567	3.5253	4.828	1.2388
T581G	SNV	chr3:49933257	73.058	1.6324	16.002	2.0927	6.2789	0.93684
T581C	SNV	chr3:49933257	61.005	7.5812	18.866	8.0902	1.8829	2.5746
T581A	SNV	chr3:49933257	65.773	7.4712	16.811	5.7803	1.782	2.3824
T581TC	IN	chr3:49933257	56.231	7.279	26.975	5.6473	2.8854	0.98186
T581TA	IN	chr3:49933257	58.171	2.4703	31.076	2.5977	3.0448	2.6393
TG582T	DEL	chr3:49933257	73.842	7.0295	10.461	4.5648	1.9915	2.1111
G582T	SNV	chr3:49933256	65.558	6.3851	19.147	4.7436	2.2681	1.8979
G582A	SNV	chr3:49933256	48.648	4.0464	39.398	3.4629	3.3917	1.053
G583T	SNV	chr3:49933255	52.44	8.489	27.036	7.1526	1.459	3.4239
G583A	SNV	chr3:49933255	63.177	10.015	16.625	6.0019	1.5969	2.5841
G584T	SNV	chr3:49933254	65.943	7.8844	15.787	5.1303	2.0326	3.222
G584C	SNV	chr3:49933254	61.445	8.6894	18.4	5.384	1.4822	4.5998
G584A	SNV	chr3:49933254	66.983	11.148	10.664	6.6161	1.3123	3.2758
G585T	SNV	chr3:49933253	63.618	5.4755	21.931	6.0863	1.0914	1.7972
G585C	SNV	chr3:49933253	66.164	5.6487	18.208	4.7303	4.4378	0.81158
G585A	SNV	chr3:49933253	61.982	9.5575	17.525	6.3464	1.7772	2.8118
T586G	SNV	chr3:49933252	66.76	4.7326	17.417	7.0929	1.9158	2.0816
T586C	SNV	chr3:49933252	64.81	7.4594	17.693	5.8922	1.863	2.2826
T586A	SNV	chr3:49933252	69.312	6.3867	14.538	5.587	1.1507	3.0261
TC587T	DEL	chr3:49933252	65.783	10.199	15.011	3.9964	2.1428	2.8679
C587T	SNV	chr3:49933251	65.258	6.5561	18.092	6.5333	1.7496	1.8113
C587G	SNV	chr3:49933251	81.208	0.076271	3.0506	13.777	1.5684	0.31949
C587A	SNV	chr3:49933251	66.887	3.9921	19.718	4.528	3.4509	1.4239
C588T	SNV	chr3:49933250	64.64	4.8055	18.516	8.4455	1.6395	1.9533
C588A	SNV	chr3:49933250	59.501	8.0999	21.36	6.122	2.0748	2.8426
C589T	SNV	chr3:49933249	62.619	4.8335	20.791	6.7225	2.0128	3.0215
C589G	SNV	chr3:49933249	59.976	8.1188	19.95	7.662	1.7221	2.5709
C589A	SNV	chr3:49933249	64.606	8.4946	16.771	5.8598	1.9455	2.3227
A590T	SNV	chr3:49933248	60.858	6.222	22.161	5.4009	2.8337	2.5249
A590G	SNV	chr3:49933248	64.202	7.2056	18.838	5.3881	2.2872	2.079
A590C	SNV	chr3:49933248	46.769	8.5242	31.253	7.6695	3.0418	2.7429
C591T	SNV	chr3:49933247	62.75	4.3571	23.208	5.288	3.0575	1.3392
C591G	SNV	chr3:49933247	60.636	7.2027	21.052	5.9713	2.4446	2.6934
C591A	SNV	chr3:49933247	62.754	4.3916	22.421	6.0795	2.7714	1.5826
A592T	SNV	chr3:49933246	64.121	6.0455	18.778	7.0822	2.1135	1.86
A592G	SNV	chr3:49933246	60.18	3.9352	24.624	6.0482	3.6389	1.5735
A592C	SNV	chr3:49933246	59.461	10.283	22.355	2.7556	2.269	2.8757
G593T	SNV	chr3:49933245	59.633	6.0159	24.913	4.7666	3.1428	1.5288
G593A	SNV	chr3:49933245	64.562	6.5795	18.811	5.4984	2.0303	2.5187
A594T	SNV	chr3:49933244	57.821	5.2357	25.301	7.5002	2.0852	2.0565
A594G	SNV	chr3:49933244	49.658	3.7251	37.085	2.3752	5.8962	1.2613
A594C	SNV	chr3:49933244	66.412	5.7209	11.99	10.344	2.5255	3.0077
G595T	SNV	chr3:49933243	64.879	6.487	18.665	6.0091	2.0368	1.9229
G595C	SNV	chr3:49933243	75.493	6.6349	10.283	4.1048	1.4967	1.9875
G595A	SNV	chr3:49933243	62.586	9.377	17.042	6.2185	1.6693	3.1073
C596T	SNV	chr3:49933242	63.841	6.3549	21.329	4.6308	2.1102	1.7334
C596A	SNV	chr3:49933242	66.396	9.0105	14.695	5.9052	1.9389	2.0546
A597T	SNV	chr3:49933241	70.944	6.0229	15.804	3.6957	1.9025	1.6305
A597G	SNV	chr3:49933241	64.059	7.2812	18.852	5.6108	1.9695	2.2281
A597C	SNV	chr3:49933241	61.103	8.3209	21.192	3.6394	2.9739	2.771
C598T	SNV	chr3:49933240	67.044	5.7293	18.356	4.8568	2.28	1.7344
C598G	SNV	chr3:49933240	62.407	3.238	27.763	2.5665	2.7923	1.2336
C598A	SNV	chr3:49933240	53.87	5.9611	26.633	6.0997	3.1822	4.2545
G599T	SNV	chr3:49933239	63.729	8.1476	17.747	5.5081	1.5502	3.3185
G599A	SNV	chr3:49933239	65.16	5.7675	19.358	5.7498	2.2576	1.7076
C600T	SNV	chr3:49933238	59.55	7.8946	18.031	10.262	1.9631	2.2981
C600A	SNV	chr3:49933238	62.058	5.266	22.74	6.2701	2.0942	1.5717
T601C	SNV	chr3:49933237	59.525	5.4907	24.07	5.1318	4.0824	1.7008
T601A	SNV	chr3:49933237	62.944	4.9037	22.403	5.1427	3.6854	0.92045
TC602T	DEL	chr3:49933237	72.03	5.6301	14.32	1.9974	3.222	2.8
C602T	SNV	chr3:49933236	66.581	7.1034	16.439	5.2348	2.4913	2.1502
C602G	SNV	chr3:49933236	66.917	6.5556	15.971	5.9929	1.8452	2.7186
C603T	SNV	chr3:49933235	56.839	5.7902	28.106	3.435	4.4441	1.3851
C603G	SNV	chr3:49933235	67.307	5.6829	17.371	5.121	2.2219	2.2953
C603A	SNV	chr3:49933235	61.03	5.9633	22.201	6.2758	2.2745	2.2557
CT604C	DEL	chr3:49933235	66.716	13.363	10.766	3.6953	2.594	2.8658
T604G	SNV	chr3:49933234	65.772	3.8753	20.763	4.7341	3.1347	1.7208
T604C	SNV	chr3:49933234	63.738	6.5546	19.442	6.061	2.4582	1.7469
T604A	SNV	chr3:49933234	65.16	6.4789	18.773	5.2508	2.3548	1.9832
T605G	SNV	chr3:49933233	65.519	5.5836	18.518	5.2511	2.5497	2.5785
T605C	SNV	chr3:49933233	66.193	7.46	15.742	6.1841	1.9539	2.4671
T605A	SNV	chr3:49933233	63.141	4.3251	23.834	3.1478	3.7407	1.8118
TG606T	DEL	chr3:49933233	64.953	13.09	14.117	3.8936	1.5038	2.4429
G606T	SNV	chr3:49933232	59.759	10.029	19.484	6.1519	2.3153	2.2605
G606A	SNV	chr3:49933232	59.41	4.9446	27.554	3.313	3.2671	1.5108
G607T	SNV	chr3:49933231	55.133	10.1	25.636	3.8958	3.2727	1.9624
G607C	SNV	chr3:49933231	59.864	3.0462	25.705	4.7013	2.7085	3.9752
G607A	SNV	chr3:49933231	63.447	6.5753	19.91	5.5204	2.2776	2.2693
T608C	SNV	chr3:49933230	60.394	7.2674	22.034	5.7886	2.3509	2.1655
T608A	SNV	chr3:49933230	64.282	7.7757	16.814	6.4207	1.852	2.8557
A609T	SNV	chr3:49933229	69.342	6.0937	15.595	3.8077	2.8625	2.2982
A609G	SNV	chr3:49933229	64.275	7.8355	17.896	6.009	1.8335	2.1503
T610G	SNV	chr3:49933228	61.379	6.095	21.656	4.2768	3.1956	3.3977
T610C	SNV	chr3:49933228	61.179	5.1822	26.473	4.0818	1.9313	1.1529
T610A	SNV	chr3:49933228	62.983	5.6382	20.996	6.771	1.9398	1.6715
C611T	SNV	chr3:49933227	62.626	8.7885	18.036	4.8182	1.9251	3.8062
C611G	SNV	chr3:49933227	69.179	3.3563	19.428	2.454	3.6297	1.9525
C611A	SNV	chr3:49933227	62.446	5.194	21.819	4.7537	3.7114	2.0756
C612T	SNV	chr3:49933226	61.453	5.4559	24.536	4.8566	2.4524	1.2461
C612G	SNV	chr3:49933226	59.267	3.9614	26.999	4.2044	3.5034	2.0655
C612A	SNV	chr3:49933226	62.436	5.297	22.43	5.4625	2.6788	1.6956
CT613C	DEL	chr3:49933226	77.359	7.9734	7.9188	2.6836	1.8467	2.2188
T613C	SNV	chr3:49933225	65.982	6.2414	18.803	4.9175	2.1702	1.8868
T613A	SNV	chr3:49933225	62.582	6.8706	20.542	5.1557	2.8138	2.0355
G614T	SNV	chr3:49933224	61.733	5.7326	22.665	4.6724	3.1265	2.0703
G614C	SNV	chr3:49933224	67.136	7.8741	16.613	3.0169	2.3331	3.027
G614A	SNV	chr3:49933224	62.263	5.6751	24.864	3.4011	2.1361	1.6607
C615T	SNV	chr3:49933223	62.131	4.727	23.515	4.1112	3.2396	2.2765
C615G	SNV	chr3:49933223	62.614	7.7248	19.127	6.4763	1.9329	2.1252
C615A	SNV	chr3:49933223	64.282	5.4901	21.47	4.5949	2.7179	1.445
T616C	SNV	chr3:49933222	66.185	5.935	18.495	5.0034	2.4049	1.9766
G617T	SNV	chr3:49933221	61.622	9.6785	18.154	4.2669	4.5996	1.6791
G617C	SNV	chr3:49933221	65.136	5.9363	19.543	4.9555	1.945	2.4843
G617A	SNV	chr3:49933221	62.077	7.6048	19.854	6.6521	1.7544	2.0577
GC618G	DEL	chr3:49933221	69.067	11.854	9.3578	4.5363	1.4769	3.7079
C618T	SNV	chr3:49933220	64.896	9.0662	16.158	5.5921	1.7371	2.5509
C618G	SNV	chr3:49933220	70.471	6.3703	11.48	8.6214	1.5154	1.5418
C618A	SNV	chr3:49933220	66.243	8.5532	10.192	8.9648	2.5683	3.4783
C619T	SNV	chr3:49933219	69.335	6.4195	14.652	5.0756	1.7582	2.7602
C619G	SNV	chr3:49933219	67.356	9.1122	12.777	6.4867	1.0323	3.2356
C619A	SNV	chr3:49933219	67.25	6.7507	14.401	7.4665	1.6892	2.4422
C619CT	IN	chr3:49933219	71.014	8.961	11.168	3.4967	2.2616	3.0986
CT620C	DEL	chr3:49933219	57.758	18.915	13.657	5.0672	2.1951	2.4084
T620G	SNV	chr3:49933218	59.378	8.6414	21.204	5.407	2.5161	2.8539
T620C	SNV	chr3:49933218	61.713	7.6667	20.222	5.9572	2.6279	1.8127
T620A	SNV	chr3:49933218	63.422	5.7928	21.116	5.2411	2.4595	1.9689
T621G	SNV	chr3:49933217	52.584	14.149	23.305	5.4587	2.5319	1.9708
T621C	SNV	chr3:49933217	69.663	6.2399	15.068	4.1234	2.1853	2.7198
T621A	SNV	chr3:49933217	65.579	7.8042	16.595	6.1452	1.4481	2.4285
T622C	SNV	chr3:49933216	69.983	6.5454	14.146	4.625	1.9044	2.7962
T622A	SNV	chr3:49933216	62.749	6.6736	20.21	5.1255	2.6604	2.5817
G623T	SNV	chr3:49933215	37.331	3.2028	32.442	7.5703	17.802	1.6523
G623A	SNV	chr3:49933215	72.561	7.0244	12.729	3.9536	1.4845	2.2473
C624T	SNV	chr3:49933214	65.397	8.205	15.805	6.0717	1.8752	2.6459
C624G	SNV	chr3:49933214	66.558	3.889	19.054	5.1201	4.149	1.2299
C624A	SNV	chr3:49933214	60.185	13.626	13.429	5.7714	1.8205	5.1683
T625G	SNV	chr3:49933213	63.644	6.5281	24.686	2.8302	1.132	1.1797
T625C	SNV	chr3:49933213	68.174	6.4329	18.144	3.0903	2.471	1.6875
T625A	SNV	chr3:49933213	47.658	8.0354	34.27	4.124	3.6264	2.2861
G626T	SNV	chr3:49933212	61.597	11.744	16.376	7.1076	1.2488	1.9267
G626A	SNV	chr3:49933212	64.094	7.2339	19.185	4.5568	2.5369	2.3931
C627T	SNV	chr3:49933211	65.105	7.8696	19.447	3.9317	1.9626	1.6843
C627G	SNV	chr3:49933211	61.786	6.3246	22.968	4.8994	2.4735	1.5485
C627A	SNV	chr3:49933211	64.263	6.7307	17.061	7.4825	1.582	2.8803
T628G	SNV	chr3:49933210	62.894	6.6904	18.974	5.876	3.3181	2.2475
T628C	SNV	chr3:49933210	66.29	5.6723	19.69	5.1096	1.8081	1.4299
T628A	SNV	chr3:49933210	63.091	4.5866	22.755	5.6405	2.4987	1.4286
TG629T	DEL	chr3:49933210	63.96	6.7529	21.741	4.6086	1.4212	1.5155
G629T	SNV	chr3:49933209	63.016	7.6157	18.976	6.1949	1.7607	2.437
G629C	SNV	chr3:49933209	60.092	7.5319	22.438	4.7946	2.5581	2.5859
G629A	SNV	chr3:49933209	59.209	7.5852	23.717	5.6505	1.9486	1.8905
C630T	SNV	chr3:49933208	59.91	8.0643	20.619	7.4122	1.9755	2.0191
C630G	SNV	chr3:49933208	69.857	5.6339	15.378	3.9805	3.1641	1.9872
C630A	SNV	chr3:49933208	63.996	6.1045	18.67	7.0201	2.3527	1.8562
T631G	SNV	chr3:49933207	72.574	7.531	10.423	5.559	1.0869	2.8262
T631C	SNV	chr3:49933207	68.697	5.8679	17.024	3.8542	2.5819	1.9749
T631A	SNV	chr3:49933207	63.795	7.1156	17.938	6.158	2.176	2.8173
T632C	SNV	chr3:49933206	65.684	7.1719	17.736	4.9519	2.1041	2.3527
T632A	SNV	chr3:49933206	64.39	5.1642	21.07	4.807	2.704	1.864
G633T	SNV	chr3:49933205	60.672	9.0685	22.196	3.7233	2.6413	1.6989
G633C	SNV	chr3:49933205	66.772	7.2772	16.956	4.9328	1.0051	3.0576
G633A	SNV	chr3:49933205	62.431	6.7613	20.822	5.6509	2.2951	2.0398
T634C	SNV	chr3:49933204	62.234	8.2743	20.542	4.474	2.0511	2.4247
T634A	SNV	chr3:49933204	62.406	8.365	19.393	5.6971	1.8777	2.2613
TG635T	DEL	chr3:49933204	68.755	8.779	13.285	3.0045	2.6757	3.5002
G635T	SNV	chr3:49933203	65.603	8.4396	16.331	5.5745	2.0048	2.0471
G635C	SNV	chr3:49933203	62.783	7.2877	20.827	4.7592	1.9608	2.383
G635A	SNV	chr3:49933203	68.197	4.5006	18.942	3.8923	2.9973	1.4713
G636T	SNV	chr3:49933202	61.785	13.136	15.067	5.0982	1.4267	3.4873
G636C	SNV	chr3:49933202	64.926	8.7577	13.403	9.641	1.5436	1.7293
G636A	SNV	chr3:49933202	65.556	8.2318	14.456	7.1477	1.7244	2.8834
C637T	SNV	chr3:49933201	63.08	7.1228	21.181	4.5346	2.3743	1.7073
C637G	SNV	chr3:49933201	75.529	7.9118	10.137	3.3347	2.0288	1.0585
C637A	SNV	chr3:49933201	68.061	10.418	11.65	6.4111	1.2949	2.1653
T638C	SNV	chr3:49933200	65.493	5.2292	19.376	5.7553	2.1222	2.0247
T638A	SNV	chr3:49933200	63.096	6.0407	21.929	4.5723	2.4923	1.8694
G639T	SNV	chr3:49933199	66.845	7.3519	16.367	4.7764	2.001	2.658
G639C	SNV	chr3:49933199	66.394	5.7175	17.182	6.5421	2.2819	1.8824
G639A	SNV	chr3:49933199	67.907	8.4658	13.852	5.3902	2.0098	2.375
C640T	SNV	chr3:49933198	71.461	6.795	13.757	3.8103	2.2834	1.893
C640G	SNV	chr3:49933198	60.731	5.4102	25.33	4.9604	2.5856	0.98205
C640A	SNV	chr3:49933198	65.979	6.0678	21.426	2.2238	2.4765	1.8267
A641T	SNV	chr3:49933197	67.882	6.2323	14.824	5.9665	2.6923	2.4033
A641G	SNV	chr3:49933197	67.346	7.0827	16.485	4.724	2.334	2.0283
A641C	SNV	chr3:49933197	74.513	4.1457	13.886	3.8113	2.3382	1.3064
C642T	SNV	chr3:49933196	65.021	6.9821	19.21	4.7258	2.0825	1.9786
C642G	SNV	chr3:49933196	67.794	4.9673	17.74	5.1713	2.063	2.2645
C642A	SNV	chr3:49933196	66.454	7.4027	17.202	4.6647	2.7696	1.5064
T643G	SNV	chr3:49933195	70.331	4.8535	13.107	5.8825	2.5362	3.2893
T643C	SNV	chr3:49933195	68.757	7.7068	14.134	4.7805	1.9179	2.7034
T643A	SNV	chr3:49933195	62.543	5.9333	21.651	5.6136	2.5177	1.7418
G644T	SNV	chr3:49933194	65.18	6.7216	18.244	5.7895	1.7144	2.351
G644C	SNV	chr3:49933194	64.108	9.7295	15.822	5.8216	2.0741	2.4449
G644A	SNV	chr3:49933194	64.108	6.2844	19.049	6.5462	1.5321	2.4809
G645T	SNV	chr3:49933193	62.013	8.5151	16.627	10.073	1.2679	1.5048
G645C	SNV	chr3:49933193	69.009	7.7362	12.936	6.478	1.631	2.2091
G645A	SNV	chr3:49933193	69.584	7.4954	12.764	6.2546	1.479	2.4236
C646T	SNV	chr3:49933192	66.614	3.528	21.249	3.9606	3.0805	1.568
C646G	SNV	chr3:49933192	67.55	5.3735	18.769	3.9776	2.9693	1.3616
C646A	SNV	chr3:49933192	63.349	5.3455	19.719	7.4541	1.9971	2.135
G647T	SNV	chr3:49933191	53.767	3.6547	27.162	12.035	1.7158	1.6658
G647C	SNV	chr3:49933191	61.426	4.0347	26.037	3.3097	3.4836	1.7083
G647A	SNV	chr3:49933191	65.896	5.1968	20.37	4.3648	2.1989	1.9737
A648T	SNV	chr3:49933190	61.502	7.5527	20.92	5.5814	2.3101	2.1337
A648G	SNV	chr3:49933190	60.711	3.3994	27.069	4.1888	3.3252	1.3063
A648C	SNV	chr3:49933190	60.991	6.9366	21.534	5.4293	3.458	1.6504
C649T	SNV	chr3:49933189	64.86	5.4673	20.51	4.7127	2.9588	1.491
C649G	SNV	chr3:49933189	67.279	9.4717	15.523	3.8793	2.0498	1.7974
C649A	SNV	chr3:49933189	65.489	8.4551	16.917	4.9234	2.132	2.084
T650G	SNV	chr3:49933188	61.7	4.2951	23.223	7.0628	1.5215	2.1981
T650C	SNV	chr3:49933188	60.95	4.6739	25.858	3.6266	3.2315	1.66
T650A	SNV	chr3:49933188	63.054	5.5306	21.834	4.9905	2.5888	2.0019
G651T	SNV	chr3:49933187	66.036	7.9452	16.645	5.1428	1.8761	2.3548
G651A	SNV	chr3:49933187	64.118	6.6934	19.083	5.9895	2.2553	1.8611
C652T	SNV	chr3:49933186	61.675	6.5955	22.197	5.2721	2.9673	1.2931
C652G	SNV	chr3:49933186	70.886	10.969	11.054	4.8273	0.87181	1.3922
C652A	SNV	chr3:49933186	70.634	4.3389	12.275	8.7375	2.1611	1.8531
A653T	SNV	chr3:49933185	63.477	7.7122	20.1	4.5214	1.7744	2.4145
A653G	SNV	chr3:49933185	57.926	2.7141	30.138	2.8609	4.9966	1.3645
A653C	SNV	chr3:49933185	60.972	6.2544	24.919	3.5383	2.3834	1.9326
C654T	SNV	chr3:49933184	59.428	10.472	18.681	6.7113	1.8544	2.853
C654G	SNV	chr3:49933184	69.053	5.7417	17.145	3.9144	3.0186	1.127
C654A	SNV	chr3:49933184	64.986	5.8534	18.556	6.5265	2.2943	1.784
T655G	SNV	chr3:49933183	58.961	11.969	18.087	7.9945	1.6257	1.3623
T655C	SNV	chr3:49933183	63.32	6.9734	19.559	5.6419	2.6148	1.891
T655A	SNV	chr3:49933183	65.097	5.4414	20.225	5.416	2.247	1.5732
TG656T	DEL	chr3:49933183	51.481	19.129	12.144	14.657	0.38314	2.206
G656T	SNV	chr3:49933182	63.693	6.707	20.021	6.1565	1.8464	1.5762
G656C	SNV	chr3:49933182	70.788	4.4925	17.26	3.9708	2.157	1.331
G656A	SNV	chr3:49933182	62.229	5.8342	22.709	4.9213	2.5677	1.7393
G657C	SNV	chr3:49933181	65.663	7.0748	16.303	6.95	1.7893	2.2198
G657A	SNV	chr3:49933181	64.706	7.9268	16.878	6.7424	1.7725	1.9743
T658G	SNV	chr3:49933180	67.839	2.3472	21.554	5.5631	1.5102	1.1868
T658C	SNV	chr3:49933180	66.295	6.5108	18.907	4.2377	2.4003	1.6489
T658A	SNV	chr3:49933180	65.526	5.7612	19.017	5.3247	1.8685	2.502
C659T	SNV	chr3:49933179	64.739	5.4617	21.896	3.2764	2.6776	1.9491
C659A	SNV	chr3:49933179	59.063	6.2513	27.307	1.757	3.9497	1.6718
T660C	SNV	chr3:49933178	61.818	5.3289	23.673	4.4139	2.9451	1.8214
T660A	SNV	chr3:49933178	60.145	7.5661	23.177	3.9299	3.1056	2.0762
T661G	SNV	chr3:49933177	67.861	5.0531	20.02	2.2553	3.5302	1.2807
T661C	SNV	chr3:49933177	65.631	5.5713	20.61	4.144	2.2643	1.7799
T661A	SNV	chr3:49933177	65.519	6.1697	18.587	5.4986	2.2246	2.0009
C662T	SNV	chr3:49933176	52.952	4.7102	32.434	3.2304	4.8737	1.7993
C662A	SNV	chr3:49933176	55.19	3.9863	27.024	9.8525	3.1723	0.77563
A663T	SNV	chr3:49933175	65.935	5.5093	20.913	3.9727	1.9486	1.7209
A663G	SNV	chr3:49933175	66.7	6.6179	17.235	5.0896	2.0037	2.3539
A663C	SNV	chr3:49933175	58.248	4.9069	27.94	4.2457	3.3464	1.3131
G664T	SNV	chr3:49933174	68.033	5.4202	16.425	6.3081	1.2985	2.5156
G664C	SNV	chr3:49933174	71.78	9.0662	14.396	1.9893	1.7352	1.0329
G664A	SNV	chr3:49933174	60.875	8.3739	19.933	6.8324	1.8379	2.1477
C665T	SNV	chr3:49933173	63.395	6.0933	21.508	4.492	2.8135	1.6983
C665G	SNV	chr3:49933173	69.567	4.5262	17.018	4.4545	2.7554	1.6794
C665A	SNV	chr3:49933173	62.628	7.4191	20.92	4.9224	2.3961	1.7147
T666G	SNV	chr3:49933172	61.765	5.3477	20.21	7.0851	5.0119	0.58022
T666C	SNV	chr3:49933172	64.82	5.4936	22.06	2.9325	2.8008	1.8934
T666A	SNV	chr3:49933172	63.434	8.0733	17.994	6.5047	1.8545	2.1402
A667T	SNV	chr3:49933171	62.432	9.8212	18.237	5.3644	1.781	2.3648
A667G	SNV	chr3:49933171	61.031	6.7706	21.065	6.4077	2.4669	2.259
C668T	SNV	chr3:49933170	63.435	6.3696	20.176	5.4151	2.4572	2.1473
C668A	SNV	chr3:49933170	66.437	4.2512	19.574	6.0694	2.5356	1.133
T669G	SNV	chr3:49933169	52.223	8.5068	28.696	2.1331	3.4737	4.9672
T669C	SNV	chr3:49933169	63.09	6.273	21.381	4.2967	2.8194	2.1403
T669A	SNV	chr3:49933169	69.549	5.0874	16.105	5.3654	2.1939	1.6994
TG670T	DEL	chr3:49933169	67.974	10.342	12.677	4.6774	1.8827	2.447
G670T	SNV	chr3:49933168	63.789	5.8507	20.138	5.2228	3.004	1.9958
G670C	SNV	chr3:49933168	66.327	7.0174	15.645	5.9607	2.451	2.599
G670A	SNV	chr3:49933168	62.86	7.2009	20.933	4.4796	2.4078	2.1187
G671T	SNV	chr3:49933167	73.752	11.021	7.696	3.073	1.8538	2.6046
G671A	SNV	chr3:49933167	62.782	6.8796	19.977	6.1575	1.8917	2.3122
GT672G	DEL	chr3:49933167	79.376	5.3556	7.4237	1.9819	1.954	3.9088
T672G	SNV	chr3:49933166	65.086	5.881	24.439	4.4347	0.034433	0.12453
T672C	SNV	chr3:49933166	65.596	8.1566	16.828	5.8623	1.7799	1.7778
T672A	SNV	chr3:49933166	63.833	6.5795	19.093	6.2358	2.0246	2.2334
TG673T	DEL	chr3:49933166	71.966	6.1061	15.534	2.298	2.4561	1.64
G673T	SNV	chr3:49933165	64.906	8.0103	17.928	5.2421	1.8886	2.0246
G673C	SNV	chr3:49933165	59.974	8.242	22.643	3.8416	1.2644	4.035
G673A	SNV	chr3:49933165	62.887	5.5304	22.911	4.7468	2.6094	1.3155
G674T	SNV	chr3:49933164	64.754	5.6524	18.335	7.1237	2.0655	2.0696
G674C	SNV	chr3:49933164	64.301	6.6209	23.481	2.6825	1.7527	1.1618
G674A	SNV	chr3:49933164	64.963	8.1891	16.32	6.1352	1.7198	2.6729
C675T	SNV	chr3:49933163	66.052	6.0723	18.097	6.0333	1.9195	1.8258
C675G	SNV	chr3:49933163	66.246	5.4237	19.198	2.7697	3.8524	2.5097
C675A	SNV	chr3:49933163	65.094	7.0036	20.19	3.6735	2.179	1.8598
CG676C	DEL	chr3:49933163	69.185	8.438	10.385	3.7329	2.6975	5.561
G676T	SNV	chr3:49933162	66.465	4.2907	22.261	2.7387	2.4585	1.7861
G676C	SNV	chr3:49933162	60.912	8.1445	20.386	7.0635	1.7883	1.7058
G676A	SNV	chr3:49933162	64.328	5.0853	22.548	3.9126	1.9739	2.1517
G677T	SNV	chr3:49933161	70.442	4.4627	17.751	3.0648	2.2905	1.9891
G677A	SNV	chr3:49933161	54.113	9.619	26.18	4.4494	2.3195	3.319
A678T	SNV	chr3:49933160	69.053	6.0225	17.758	3.8215	2.0013	1.3434
A678G	SNV	chr3:49933160	59.462	5.753	27.446	2.8352	2.3897	2.1149
AG679A	DEL	chr3:49933160	69.571	11.094	11.174	1.9821	2.281	3.8968
G679T	SNV	chr3:49933159	63.392	7.3097	18.957	5.9809	1.9768	2.3832
G679A	SNV	chr3:49933159	68.821	5.7682	15.375	5.8779	2.208	1.9502
G680T	SNV	chr3:49933158	57.475	5.2273	27.503	5.7631	2.0616	1.9696
G680A	SNV	chr3:49933158	66.023	8.1719	16.44	4.7074	2.1506	2.5068
GA681G	DEL	chr3:49933158	67.018	10.998	16.863	3.3441	0.96434	0.81287
A681T	SNV	chr3:49933157	61.485	5.6005	24.244	3.5381	3.1099	2.0218
A681G	SNV	chr3:49933157	65.664	6.0797	19.935	3.8216	2.6687	1.8313
A682T	SNV	chr3:49933156	66.004	5.9636	17.434	5.6399	2.8116	2.1464
A682G	SNV	chr3:49933156	65.472	5.3379	20.273	4.0337	2.9736	1.91
G683T	SNV	chr3:49933155	68.965	7.9649	14.317	4.5142	2.3799	1.8592
G683C	SNV	chr3:49933155	62.086	8.6994	19.101	4.5268	1.8234	3.7636
G683A	SNV	chr3:49933155	59.745	7.1424	22.993	5.1685	2.5095	2.4417
C684T	SNV	chr3:49933154	65.283	5.7383	18.927	5.3905	2.1032	2.5583
C684G	SNV	chr3:49933154	62.561	2.9043	27.628	0.51056	5.0683	1.3281
C684A	SNV	chr3:49933154	64.433	7.355	17.911	6.1653	1.8566	2.28
A685T	SNV	chr3:49933153	63.789	7.0014	18.99	6.35	1.8127	2.0568
A685G	SNV	chr3:49933153	63.731	7.2999	19.085	5.8425	1.9128	2.1284
A685C	SNV	chr3:49933153	55.234	5.7977	31.621	2.6251	2.9291	1.7928
G686T	SNV	chr3:49933152	64.923	6.108	18.76	5.1583	2.1071	2.9434
G686C	SNV	chr3:49933152	51.356	11.872	27.897	1.8443	4.6648	2.3651
G686A	SNV	chr3:49933152	62.939	6.7616	20.071	6.4262	1.7051	2.0969
C687T	SNV	chr3:49933151	63.886	7.2167	20.971	3.5806	2.0972	2.248
C687G	SNV	chr3:49933151	62.434	7.4018	23.021	3.5655	2.0195	1.5585
C687A	SNV	chr3:49933151	65.669	4.9913	21.388	4.1415	1.7587	2.0512
T688G	SNV	chr3:49933150	61.705	6.4644	20.841	5.836	2.7512	2.4028
T688C	SNV	chr3:49933150	63.461	6.8127	20.783	4.8614	1.7819	2.2991
T688A	SNV	chr3:49933150	63.17	6.4593	21.889	5.8178	1.4997	1.1645
A689T	SNV	chr3:49933149	65.372	7.671	18.427	4.3383	1.6649	2.5263
A689G	SNV	chr3:49933149	65.121	7.6574	17.784	4.5928	2.579	2.266
A689C	SNV	chr3:49933149	64.849	7.8481	16.273	6.8654	2.2083	1.9567
G690T	SNV	chr3:49933148	70.276	4.1032	18.136	1.973	3.9456	1.5659
G690C	SNV	chr3:49933148	76.887	4.0914	11.581	2.376	2.9654	2.099
G690A	SNV	chr3:49933148	50.607	2.8619	35.67	0.86108	8.5381	1.4624
G691T	SNV	chr3:49933147	23.1	5.1291	44.924	1.0497	25.218	0.57901
G691A	SNV	chr3:49933147	19.914	0.91007	63.702	0.20321	14.955	0.3152
T692G	SNV	chr3:49933146	16.185	0.72592	74.591	0.035539	7.567	0.89584
T692C	SNV	chr3:49933146	21.613	2.013	62.531	0.32106	13.089	0.43332
T692A	SNV	chr3:49933146	12.98	1.0648	67.888	0.646	16.869	0.55196
G693T	SNV	chr3:49933145	14.351	0.30703	75.924	0.064433	6.5911	2.762
G693C	SNV	chr3:49933145	52.195	5.8534	31.214	1.9228	8.7503	0.064798
G693A	SNV	chr3:49933145	60.649	7.9359	21.307	5.673	2.2766	2.158
A694T	SNV	chr3:49933144	28.431	1.5209	54.982	0.48524	13.778	0.80339
A694G	SNV	chr3:49933144	43.938	1.8344	43.45	0.68993	9.0755	1.0126
G695T	SNV	chr3:49933143	42.013	1.9953	41.312	0.052222	13.897	0.73024
G695A	SNV	chr3:49933143	26.398	1.5868	58.289	0.57701	12.489	0.6604
T696C	SNV	chr3:49933142	62.059	3.1337	26.148	1.5289	5.7461	1.3848
T696A	SNV	chr3:49933142	72.122	4.6837	16.106	1.2496	3.5654	2.2737
T697G	SNV	chr3:49933141	76.623	6.0961	8.9835	5.0662	1.7562	1.4748
T697C	SNV	chr3:49933141	66.218	5.0289	19.332	4.4217	3.0877	1.9109
T697A	SNV	chr3:49933141	57.55	8.7533	21.884	7.9296	2.373	1.5105
C698T	SNV	chr3:49933140	67.32	5.9691	17.839	5.2333	1.7808	1.8579
C698A	SNV	chr3:49933140	57.198	8.7167	22.105	7.8438	2.2895	1.8467
T699C	SNV	chr3:49933139	61.954	6.3806	19.793	7.4012	2.4004	2.0709
T699A	SNV	chr3:49933139	60.721	5.364	21.518	7.3866	2.9082	2.1021
C700T	SNV	chr3:49933138	61.913	6.0972	21.231	6.1244	3.1674	1.4675
C700G	SNV	chr3:49933138	65.705	7.2731	18.014	3.4736	2.5648	2.9697
C700A	SNV	chr3:49933138	57.131	4.8525	24.908	7.4678	2.777	2.8636
T701G	SNV	chr3:49933137	66.93	2.9439	14.697	12.694	0.74025	1.9946
T701C	SNV	chr3:49933137	63.511	6.0575	20.452	6.462	2.6464	0.87104
T701A	SNV	chr3:49933137	65.994	5.6556	18.83	5.3239	2.2144	1.9817
TG702T	DEL	chr3:49933137	71.716	8.1403	12.505	2.263	2.6789	2.6968
G702T	SNV	chr3:49933136	70.488	5.1208	13.666	7.9276	1.4272	1.3696
G702C	SNV	chr3:49933136	59.584	6.0214	20.073	10.488	2.489	1.3435
G702A	SNV	chr3:49933136	66.298	5.4539	18.593	6.3696	1.782	1.5029
C703T	SNV	chr3:49933135	65.811	6.5033	17.608	6.6252	1.2382	2.2147
C703G	SNV	chr3:49933135	48.262	9.6672	24.624	13.249	2.6486	1.5489
C703A	SNV	chr3:49933135	60.54	5.7537	22.804	6.2982	2.4995	2.1039
CT704C	DEL	chr3:49933135	65.901	12.177	13.663	2.7757	1.611	3.8712
T704G	SNV	chr3:49933134	71.159	8.8732	12.366	3.5107	2.2917	1.7993
T704C	SNV	chr3:49933134	63.444	7.0455	19.243	5.5653	2.4341	2.2684
T704A	SNV	chr3:49933134	64.796	7.3023	18.746	4.3682	2.4118	2.3751
T704TC	IN	chr3:49933134	56.933	6.239	16.475	15.342	4.497	0.51452

## Sheet: HEK293T rep3
mutation	mutation type	genomic position	AE inclusion (%)	AE skipping (%)	full IR (%)	first IR (%)	second IR (%)	other (%)
wt mean	-	-	62.71	6.33	22.18	4.86	1.6	2.05
wt SD	-	-	3.28	0.89	2.94	0.79	0.41	0.48
A26T	SNV	chr3:49933812	61.65	5.86	24.43	4.73	1.6	1.74
A26G	SNV	chr3:49933812	54.64	5.61	31.04	5.53	1.87	1.33
G27T	SNV	chr3:49933811	67.53	7.24	16.56	3.18	1.28	4.2
G27C	SNV	chr3:49933811	63.2	3.08	29.16	0.16	2.44	1.95
G27A	SNV	chr3:49933811	56.05	6.56	28.28	5.25	1.61	2.26
C28T	SNV	chr3:49933810	62.01	5.83	24.58	4.68	1.06	1.84
C28G	SNV	chr3:49933810	51.77	8.18	31.8	7.41	0.48	0.36
C28A	SNV	chr3:49933810	62.77	6.55	21.35	4.29	2.93	2.11
T29G	SNV	chr3:49933809	64.36	6.44	21.21	4.29	1.64	2.05
T29C	SNV	chr3:49933809	62.79	6.21	23.42	4.13	1.32	2.15
T29A	SNV	chr3:49933809	58.33	5.62	28.66	3.78	1.51	2.09
G30T	SNV	chr3:49933808	61.21	2.81	26.57	2.44	1.42	5.54
G30A	SNV	chr3:49933808	63.57	6.65	22.42	4.26	1.46	1.65
T31G	SNV	chr3:49933807	62.93	8.17	20.9	4.48	1.32	2.19
T31C	SNV	chr3:49933807	63.86	6.31	21.02	4.89	1.73	2.19
T31A	SNV	chr3:49933807	58.71	5.24	25.95	5.5	2.02	2.58
G32T	SNV	chr3:49933806	53.55	6.5	30.52	4.92	2.16	2.35
G32C	SNV	chr3:49933806	50.7	9.92	31.01	4.76	1.85	1.75
G32A	SNV	chr3:49933806	57.18	6.62	26.6	5.23	1.97	2.4
C33T	SNV	chr3:49933805	65.28	7.38	19.58	4.6	1.33	1.82
C33G	SNV	chr3:49933805	56.85	10.14	20.98	8.8	0.74	2.48
C33A	SNV	chr3:49933805	71.23	7.99	14.02	3.23	0.78	2.75
C34T	SNV	chr3:49933804	52.86	5.6	32.77	5.5	1.36	1.91
C34A	SNV	chr3:49933804	62.94	4.57	25.35	3.82	1.25	2.07
G35T	SNV	chr3:49933803	52.83	3.87	30.81	6.08	3.33	3.08
G35A	SNV	chr3:49933803	63.86	5.34	22.35	5.29	1.53	1.62
C36T	SNV	chr3:49933802	68.6	5.52	17.4	4.6	1.6	2.29
C36G	SNV	chr3:49933802	54.53	6.15	26.4	7.27	2.72	2.92
C36A	SNV	chr3:49933802	70.02	3.8	15.28	4.55	4.53	1.82
C37T	SNV	chr3:49933801	63.65	5.71	22.83	4.37	1.28	2.16
C37A	SNV	chr3:49933801	62.74	4.73	25.54	3.91	0.75	2.34
CT38C	DEL	chr3:49933801	64.89	4.22	22.59	5.22	1.18	1.91
T38G	SNV	chr3:49933800	59.64	8.25	23.24	3.99	1.85	3.05
T38C	SNV	chr3:49933800	60.43	6.42	25.02	4.71	1.67	1.75
T38A	SNV	chr3:49933800	65.84	6.48	20.56	4.02	1.42	1.67
T39C	SNV	chr3:49933799	61.04	6.06	24.2	6.1	1.08	1.52
T39A	SNV	chr3:49933799	55.63	9.18	24.45	7.34	1.59	1.82
TC40T	DEL	chr3:49933799	50.76	6.75	29.19	7.79	3.02	2.5
C40T	SNV	chr3:49933798	50.08	8.58	31.31	6.67	2.23	1.13
C40A	SNV	chr3:49933798	29.84	18.83	40.67	7.27	1.04	2.34
C41T	SNV	chr3:49933797	61.18	7.06	22.34	5.38	1.51	2.53
C41G	SNV	chr3:49933797	63.93	5.73	23.6	4.14	1.81	0.8
C41A	SNV	chr3:49933797	61.55	5.59	24.01	4.95	1.81	2.08
T42G	SNV	chr3:49933796	62.08	6.7	23.58	4.06	1.47	2.11
T42C	SNV	chr3:49933796	61.8	6.24	23.48	4.56	1.37	2.56
T42A	SNV	chr3:49933796	64.54	3.87	23.31	4.91	0.99	2.38
G43T	SNV	chr3:49933795	58.45	2.77	31.61	4.54	0.84	1.78
G43C	SNV	chr3:49933795	56.85	7.09	26.19	6.98	0.78	2.11
G43A	SNV	chr3:49933795	59.46	7.83	22.31	7.41	1.47	1.52
A44T	SNV	chr3:49933794	58.29	5.44	27.08	6.15	1.51	1.52
A44G	SNV	chr3:49933794	59.75	7.12	24.48	4.84	1.87	1.94
A44C	SNV	chr3:49933794	47.64	9.93	31.41	6.54	3.65	0.82
A45T	SNV	chr3:49933793	61.78	4.92	23.96	5.28	1.85	2.21
A45G	SNV	chr3:49933793	61.84	5.97	23.58	5.11	1.39	2.1
T46G	SNV	chr3:49933792	65.55	8.51	18.39	3.54	1.52	2.49
T46C	SNV	chr3:49933792	62.61	7.57	23.31	3.25	1.15	2.13
T46A	SNV	chr3:49933792	60.53	7.67	23.89	4.5	1.7	1.7
A47T	SNV	chr3:49933791	59.51	7.92	22.69	6.06	1.79	2.02
A47G	SNV	chr3:49933791	60.42	7.71	22.75	5.71	1.74	1.67
T48G	SNV	chr3:49933790	74.1	0.8	16.46	5.64	2.45	0.55
T48C	SNV	chr3:49933790	61.03	9.32	21.54	4.57	1.75	1.79
T48A	SNV	chr3:49933790	56.84	5.89	27.21	5.84	1.79	2.43
G49C	SNV	chr3:49933789	68.84	4.89	14.62	3.87	1.7	6.08
G49A	SNV	chr3:49933789	69.28	6.07	18.58	3.07	1.17	1.83
T50G	SNV	chr3:49933788	57.1	4.27	22.72	8.95	4.05	2.91
T50C	SNV	chr3:49933788	63.01	6.94	21.67	4.65	1.67	2.06
T50A	SNV	chr3:49933788	67.65	5.85	18.98	4.72	1.12	1.69
TG51T	DEL	chr3:49933788	59.06	6.5	25.35	4.8	1.64	2.65
G51T	SNV	chr3:49933787	58.52	5.04	27.41	5.34	1.93	1.75
G51A	SNV	chr3:49933787	62.66	4.71	24.46	4.56	1.68	1.92
G52T	SNV	chr3:49933786	66.46	4.36	21.07	4.07	1.84	2.2
G52C	SNV	chr3:49933786	60.6	5.3	24.01	5.32	2.44	2.32
G52A	SNV	chr3:49933786	62.7	9.44	18.29	5.6	1.35	2.61
T53G	SNV	chr3:49933785	55.94	4.92	29.01	7.2	1.07	1.86
T53C	SNV	chr3:49933785	61.6	7.34	23.31	4.28	1.45	2.01
T53A	SNV	chr3:49933785	65.31	7.05	18.37	4.22	2.44	2.6
C54T	SNV	chr3:49933784	63.47	5.63	22.03	4.94	2.13	1.8
C54G	SNV	chr3:49933784	55.03	13.13	20.92	6.66	1.47	2.79
C54A	SNV	chr3:49933784	59.81	3.44	26.94	6.74	2.08	1
C55T	SNV	chr3:49933783	60.98	6.69	24.48	4.7	1.53	1.63
C55G	SNV	chr3:49933783	69.35	4.01	15.95	6.69	2.98	1.02
C55A	SNV	chr3:49933783	57.62	5.27	26.93	6.33	2.2	1.65
G56T	SNV	chr3:49933782	53.76	9.73	25.45	6.6	0.69	3.77
G56C	SNV	chr3:49933782	59.09	7.06	20.84	5.68	5.04	2.29
G56A	SNV	chr3:49933782	59.24	6.62	25.86	4.56	1.66	2.07
GA57G	DEL	chr3:49933782	68.04	10.38	14.81	3.56	0.98	2.23
A57T	SNV	chr3:49933781	66.83	5.18	18.3	6.46	1.82	1.41
A57G	SNV	chr3:49933781	64.08	5.61	21.69	5.58	1.49	1.55
G58T	SNV	chr3:49933780	60.59	6.88	22.91	5.27	1.95	2.4
G58A	SNV	chr3:49933780	55.09	9.63	26.18	5.9	1.77	1.45
A59T	SNV	chr3:49933779	56.64	6.7	28.92	4.82	0.89	2.03
A59G	SNV	chr3:49933779	61.33	5.97	23.01	3.78	2.78	3.13
AC60A	DEL	chr3:49933779	54.87	8.18	26.95	6.12	2.05	1.83
C60T	SNV	chr3:49933778	70.56	3.6	19.02	3.54	1.26	2.01
C60A	SNV	chr3:49933778	54.17	8.8	28.36	4.52	1.53	2.62
C61T	SNV	chr3:49933777	62.68	7.08	20.92	4.42	2.26	2.63
C61G	SNV	chr3:49933777	77.46	1.77	10.18	4.89	4.04	1.67
C61A	SNV	chr3:49933777	65.78	7.97	18.09	3.74	2.69	1.73
C62T	SNV	chr3:49933776	67.49	7.4	16.94	4.07	1.82	2.28
C62A	SNV	chr3:49933776	62.6	7.23	21.96	5.18	1.35	1.68
C63T	SNV	chr3:49933775	61.81	6.48	23.27	5.22	1.32	1.91
C63G	SNV	chr3:49933775	57.92	9.09	16.04	4.27	12.31	0.37
C63A	SNV	chr3:49933775	62.15	5.16	25.47	3.96	2.75	0.5
C63CT	IN	chr3:49933775	58.94	5.53	25.88	5.49	1.68	2.48
C64T	SNV	chr3:49933774	64.22	6.01	21.42	4.76	1.77	1.81
C64G	SNV	chr3:49933774	63.41	16.38	15.38	2.73	1.33	0.76
C64A	SNV	chr3:49933774	61.91	5.17	24.82	4.36	1.08	2.67
C64CA	IN	chr3:49933774	60.49	10.94	17.4	5.65	1.82	3.69
CA65C	DEL	chr3:49933773	60.49	5.45	23.38	3.26	2.66	4.75
A65T	SNV	chr3:49933773	61.89	7.37	22.35	4.63	1.43	2.33
A65G	SNV	chr3:49933773	62.62	5.86	22.4	5.21	1.87	2.04
A65C	SNV	chr3:49933773	59.95	5.37	27.11	4.18	1.86	1.54
AG66A	DEL	chr3:49933772	61.75	5.27	22.04	5.47	2.28	3.2
G66T	SNV	chr3:49933772	63.83	7.65	20.93	4.71	1.65	1.22
G66A	SNV	chr3:49933771	62.45	10.09	19.46	4.44	1.13	2.42
G67T	SNV	chr3:49933771	70.2	5.42	15.94	3.86	2.08	2.5
G67C	SNV	chr3:49933771	65.89	12.15	13.45	4.07	3.4	1.03
G67A	SNV	chr3:49933770	68.91	6.83	16.85	2.92	2.36	2.13
G68C	SNV	chr3:49933770	41.02	27.14	22.24	2.42	1.94	5.23
G68A	SNV	chr3:49933769	67.62	5.02	16.86	5.08	1.12	4.29
A69T	SNV	chr3:49933769	63.13	4.78	21.92	6.39	1.98	1.8
A69G	SNV	chr3:49933769	60.01	5.95	26.72	4.35	1.32	1.65
A69C	SNV	chr3:49933769	70.52	4.57	16.57	5.85	1.35	1.13
A69AT	IN	chr3:49933768	64.44	7.52	18.85	5.89	1.69	1.6
T70G	SNV	chr3:49933768	68.68	4.37	20.72	1.58	2.82	1.83
T70C	SNV	chr3:49933768	63.85	6.38	20.87	4.54	2.19	2.17
T70A	SNV	chr3:49933768	63.48	5.28	23.86	5.92	0.96	0.51
TG71T	DEL	chr3:49933767	66.97	4.76	20.17	4.5	1.6	2.01
G71T	SNV	chr3:49933767	64.97	4.06	19.17	4.4	1.84	5.56
G71C	SNV	chr3:49933766	87.25	0.45	9.32	1.28	0.9	0.81
G71A	SNV	chr3:49933766	62.52	7.05	22.02	4.63	1.66	2.11
G72T	SNV	chr3:49933766	60.86	8.49	21.41	4.02	2.39	2.83
G72C	SNV	chr3:49933765	65.83	6.4	19.37	3.27	2.24	2.88
G72A	SNV	chr3:49933765	64.3	7	21.29	3.54	1.64	2.23
G73T	SNV	chr3:49933765	72.91	4.81	14.48	3.9	1.69	2.22
G73C	SNV	chr3:49933764	74.65	3.66	14.09	4.5	2.04	1.05
G73A	SNV	chr3:49933764	70.4	7.59	14.53	3.15	2.14	2.19
T74G	SNV	chr3:49933764	40.05	20.36	19.42	15.61	1.63	2.92
T74C	SNV	chr3:49933764	66.11	6.49	20.64	3.15	1.64	1.97
T74A	SNV	chr3:49933763	65.57	4.61	23.41	3.03	1.49	1.88
T74TG	IN	chr3:49933763	60.63	7.5	22.74	5.11	1.42	2.6
G75T	SNV	chr3:49933762	63.95	6.05	21.58	4.64	1.49	2.29
G75A	SNV	chr3:49933762	64.24	6.77	21.42	4.3	1.32	1.95
G76T	SNV	chr3:49933762	65.14	6.7	18.96	3.79	2.71	2.69
G76C	SNV	chr3:49933761	66.93	6.84	18.08	3.72	1.96	2.47
G76A	SNV	chr3:49933761	63.95	7.41	20.37	4.18	1.74	2.36
C77T	SNV	chr3:49933761	60.54	4.84	25.04	5.72	1.73	2.12
C77G	SNV	chr3:49933761	58.97	5.9	28.05	2.3	2.71	2.07
C77A	SNV	chr3:49933760	64.17	5.08	23.88	4.02	1.26	1.58
CA78C	DEL	chr3:49933760	64.14	6.1	20.06	6.6	1.29	1.82
A78T	SNV	chr3:49933760	64.07	5.96	22.52	4.11	1.67	1.68
A78G	SNV	chr3:49933760	62.4	6.06	23.07	5.02	1.61	1.84
A78C	SNV	chr3:49933759	57.56	12.99	20.95	4.32	1.49	2.68
AG79A	DEL	chr3:49933759	68.23	4.92	18.52	3.96	1.85	2.52
G79T	SNV	chr3:49933759	65.18	8.2	18.53	4.06	1.96	2.08
G79C	SNV	chr3:49933758	57.22	6.73	27.19	4.14	1.93	2.78
G79A	SNV	chr3:49933758	66.13	7.49	19.09	3.47	1.02	2.8
G80T	SNV	chr3:49933758	70.17	6.97	14.88	3.82	2.05	2.12
G80C	SNV	chr3:49933757	64.59	9.73	18.9	3.2	1.15	2.44
G80A	SNV	chr3:49933757	69.19	6.18	17.87	3.03	1.49	2.25
G81T	SNV	chr3:49933756	67.12	7.58	17.32	5.49	0.92	1.57
G81A	SNV	chr3:49933756	67.78	6.88	16.64	4.08	1.86	2.76
A82T	SNV	chr3:49933756	65.32	6.11	21.2	3.4	1.85	2.12
A82G	SNV	chr3:49933755	62.73	7.63	20.74	4.97	1.99	1.94
A82C	SNV	chr3:49933755	63.37	6.55	21.78	4.22	2.01	2.06
A83T	SNV	chr3:49933754	60.4	7.48	22.69	5.25	1.71	2.47
A83G	SNV	chr3:49933754	60.07	6.53	24.8	5.46	1.38	1.77
T84G	SNV	chr3:49933754	64.31	5.18	14.06	4.06	3.19	9.2
T84C	SNV	chr3:49933753	63.05	6.24	21.33	4.95	1.72	2.71
T84A	SNV	chr3:49933753	64.4	4.84	24.42	3.23	1.84	1.26
C85T	SNV	chr3:49933752	61.04	4.96	25.54	4.9	2.42	1.14
C85A	SNV	chr3:49933752	60.98	6.16	25.49	4.09	1.57	1.72
T86G	SNV	chr3:49933752	51.1	8.71	24.11	10.05	3.37	2.66
T86C	SNV	chr3:49933751	59.9	7.84	22.82	5.4	1.89	2.14
T86A	SNV	chr3:49933751	55.61	7.66	27.17	6.18	1.83	1.56
G87T	SNV	chr3:49933750	52.46	9.16	30.08	5.57	1.29	1.44
G87A	SNV	chr3:49933750	61.92	5.96	22.8	5.64	1.69	1.98
A88T	SNV	chr3:49933750	58.22	6.82	25.02	6.09	1.74	2.11
A88G	SNV	chr3:49933749	58.03	6.94	23.24	8.02	1.72	2.05
A88C	SNV	chr3:49933749	54.49	32.63	8.64	3.11	0.17	0.96
G89T	SNV	chr3:49933748	64.68	8.5	20.03	4.3	0.59	1.9
G89A	SNV	chr3:49933748	63.4	6.23	23.14	3.77	1.84	1.61
T90G	SNV	chr3:49933748	55.7	6.89	27.98	5.31	2.56	1.56
T90C	SNV	chr3:49933747	68.66	6.24	17.4	4.07	1.42	2.21
T90A	SNV	chr3:49933747	66.43	6.09	19.43	4.36	1.62	2.08
G91T	SNV	chr3:49933747	71.83	8.19	12.66	4.34	1.16	1.82
G91C	SNV	chr3:49933747	65.02	6.95	17.96	7.45	1.52	1.1
G91A	SNV	chr3:49933746	59.06	6.95	25.09	5.36	1.06	2.48
GC92G	DEL	chr3:49933746	62.99	8.65	20.15	3.67	1.88	2.66
C92T	SNV	chr3:49933745	60.1	7.42	23.91	4.57	2.07	1.92
C92A	SNV	chr3:49933745	67.11	8.34	18.39	2.84	1.6	1.71
C93T	SNV	chr3:49933744	61.37	7.46	23.28	4.67	1.61	1.6
C93A	SNV	chr3:49933744	48.21	9.94	32.24	5.99	0.58	3.05
C94T	SNV	chr3:49933744	64.85	6.58	20.4	5.04	1.31	1.83
C94G	SNV	chr3:49933743	61.05	7.37	21.79	4.18	4.87	0.74
C94A	SNV	chr3:49933743	64.45	4.56	18.8	9.08	1.95	1.15
G95T	SNV	chr3:49933743	59.8	5.68	23.98	5.72	1.01	3.82
G95C	SNV	chr3:49933743	66.13	9.37	18.76	1.67	1.87	2.2
G95A	SNV	chr3:49933743	55.49	6.11	28.35	5.17	2.02	2.86
G95GA	IN	chr3:49933742	63.12	5.7	23.35	5.06	1.17	1.59
GA96G	DEL	chr3:49933742	52.51	9.75	25.19	6.73	3.15	2.66
A96T	SNV	chr3:49933742	59.32	6.18	26.08	5.24	1.35	1.84
A96G	SNV	chr3:49933742	58.79	6.62	25.43	5.93	1.64	1.6
A96C	SNV	chr3:49933741	61.07	6.29	23.4	5.01	1.45	2.78
AG97A	DEL	chr3:49933741	65.01	8.52	16.76	4.7	1.89	3.11
G97T	SNV	chr3:49933741	66.59	6.65	18.04	4.13	2.04	2.55
G97C	SNV	chr3:49933740	66	7.87	17.18	4.3	2.42	2.22
G97A	SNV	chr3:49933740	65.38	5.54	20.65	4.92	1.43	2.08
G98T	SNV	chr3:49933740	68.81	6.74	17.28	3.2	1.11	2.86
G98C	SNV	chr3:49933739	83.4	4.63	6.58	3.62	0.58	1.18
G98A	SNV	chr3:49933739	63.52	7.85	21.07	3.64	1.59	2.32
G99T	SNV	chr3:49933739	63.72	6.91	20.16	4.89	1.99	2.33
G99C	SNV	chr3:49933738	65.9	5.94	19.51	4.84	1.12	2.7
G99A	SNV	chr3:49933738	69.98	7.21	16.03	3.35	1.71	1.72
G100T	SNV	chr3:49933738	62.1	5.5	23.3	5.89	1.74	1.47
G100C	SNV	chr3:49933737	60.48	7.11	23.44	4.81	1.49	2.68
G100A	SNV	chr3:49933737	67.61	6.83	18.55	3.68	1.09	2.24
A101T	SNV	chr3:49933736	65.53	7.27	18.7	4.82	1.71	1.96
A101G	SNV	chr3:49933736	63.16	6.41	22.72	4.73	1.19	1.8
T102C	SNV	chr3:49933736	62.5	6.89	22.39	5.1	1.27	1.85
T102A	SNV	chr3:49933735	59.67	7.05	24.48	5.6	1.28	1.92
TG103T	DEL	chr3:49933735	72.42	3.58	15.83	4.78	1.88	1.51
G103T	SNV	chr3:49933734	47.4	6.88	37.54	4.33	1.61	2.24
G103A	SNV	chr3:49933734	57.88	4.02	29.47	5.65	1.67	1.31
G104A	SNV	chr3:49933733	62.51	6.21	22.6	5.39	1.61	1.68
GA105G	DEL	chr3:49933733	56.22	8.41	21.62	11.34	1.45	0.97
A105T	SNV	chr3:49933733	61.12	6.36	23.34	5.34	1.7	2.15
A105G	SNV	chr3:49933732	61.66	5.51	24.07	5.51	1.24	2.01
A105C	SNV	chr3:49933732	56.89	5.17	26.84	7.76	1.51	1.83
G106T	SNV	chr3:49933732	67.35	8.11	18.18	3.67	1.45	1.24
G106C	SNV	chr3:49933731	67.36	8.15	15.95	5.57	1.1	1.87
G106A	SNV	chr3:49933731	62.11	6.03	23.69	4.81	1.29	2.07
C107T	SNV	chr3:49933731	61.16	6.84	24.81	3.85	1.76	1.58
C107G	SNV	chr3:49933730	70.61	1.1	20.2	5.63	1.04	1.42
C107A	SNV	chr3:49933730	62.17	6.63	20.36	6.67	1.98	2.2
T108G	SNV	chr3:49933730	64.71	5.93	21.26	4.19	1.86	2.05
T108C	SNV	chr3:49933729	65.53	5.48	20.88	4.63	1.57	1.91
T108A	SNV	chr3:49933729	63.03	6.81	21.76	5.43	1.52	1.44
G109T	SNV	chr3:49933729	55.51	6.99	29.31	4	1.98	2.2
G109C	SNV	chr3:49933728	65.02	6.52	20.29	4.77	1.3	2.11
G109A	SNV	chr3:49933728	63.29	6.33	21.65	5.16	1.26	2.32
C110T	SNV	chr3:49933727	60.74	4.78	25.39	5.38	0.71	3.01
C110A	SNV	chr3:49933727	62.8	5.15	24.16	3.86	2.38	1.66
T111G	SNV	chr3:49933727	64.08	8.12	20.14	4.79	0.74	2.14
T111C	SNV	chr3:49933727	64.05	5.7	22.03	4.24	2.03	1.95
T111A	SNV	chr3:49933726	64.6	5.76	22.7	3.81	1.7	1.43
TG112T	DEL	chr3:49933726	62.93	7.67	19.6	6.92	1.08	1.8
G112T	SNV	chr3:49933726	63.74	5.31	22.23	4.01	2.17	2.54
G112C	SNV	chr3:49933725	66.12	7.66	14.58	9.27	0.81	1.56
G112A	SNV	chr3:49933725	63.5	7.23	20.5	6	1.04	1.72
G113T	SNV	chr3:49933725	60.5	8.59	20.99	5.9	2.17	1.85
G113C	SNV	chr3:49933724	66.92	8.89	15.6	4.8	1.72	2.07
G113A	SNV	chr3:49933724	67.17	7.05	17.9	4.58	1.33	1.97
C114T	SNV	chr3:49933724	67.24	5.89	20	3.42	1.08	2.38
C114G	SNV	chr3:49933724	64.18	6.42	19.62	5.11	2.09	2.57
C114A	SNV	chr3:49933723	69.55	7.12	15.61	2.98	2.91	1.83
CT115C	DEL	chr3:49933723	64.67	5.68	21.89	3.98	1.7	2.08
T115G	SNV	chr3:49933723	63.15	9.52	23.24	1.33	0.25	2.51
T115C	SNV	chr3:49933722	68.41	5.63	17.04	5.35	1.41	2.15
T115A	SNV	chr3:49933722	67.04	5.73	19.55	3.78	1.81	2.09
T116C	SNV	chr3:49933721	64.71	5.44	21	5.32	1.58	1.95
T116A	SNV	chr3:49933721	65.75	6.1	19.86	4.47	1.77	2.04
T117C	SNV	chr3:49933721	66.84	6.86	17.42	5.19	1.67	2.02
T117A	SNV	chr3:49933720	61.35	8.31	22.4	4.41	1.21	2.32
TA118T	DEL	chr3:49933720	72.26	4.05	17.4	3.5	1.16	1.63
A118T	SNV	chr3:49933720	60.28	7.34	22.59	5.51	1.86	2.43
A118G	SNV	chr3:49933719	68.09	5.57	18.52	4.41	1.78	1.62
A118C	SNV	chr3:49933719	62.04	6.4	22.2	6.52	1.25	1.6
C119T	SNV	chr3:49933719	58.58	5.92	24.33	6.31	2.19	2.67
C119G	SNV	chr3:49933718	67.53	9.38	16.72	4.27	0.57	1.52
C119A	SNV	chr3:49933718	60.77	2.22	26.44	3.2	4.39	2.99
A120T	SNV	chr3:49933718	59.88	5.59	23.92	5.84	2.17	2.6
A120G	SNV	chr3:49933717	61.83	5.5	22.91	6.14	1.7	1.91
A120C	SNV	chr3:49933717	73.21	5.02	15.06	4.97	0.37	1.37
C121T	SNV	chr3:49933717	62.18	4.98	25.04	4.18	2.19	1.43
C121G	SNV	chr3:49933716	60.19	9.37	22.02	4.88	1.38	2.17
C121A	SNV	chr3:49933716	58.7	5.51	25.97	4.72	2.98	2.12
T122G	SNV	chr3:49933716	69.6	2.98	16.58	7.37	2	1.47
T122C	SNV	chr3:49933715	64.72	7.88	19.19	4.24	1.59	2.38
T122A	SNV	chr3:49933715	63.04	6.52	21.9	4.72	1.79	2.04
G123T	SNV	chr3:49933715	65.84	6.41	19.79	4.18	1.22	2.56
G123C	SNV	chr3:49933714	65.5	3.35	20.63	4.99	3.12	2.41
G123A	SNV	chr3:49933714	61.72	4.88	24.29	4.5	2.44	2.17
C124T	SNV	chr3:49933714	66.22	5.32	18.91	6.21	1.44	1.89
C124G	SNV	chr3:49933713	54.46	8.16	26.74	3.48	1.39	5.76
C124A	SNV	chr3:49933713	63.91	5.56	22.97	4.23	1.73	1.6
C125T	SNV	chr3:49933712	59.66	7.04	23.55	5.88	2	1.87
C125A	SNV	chr3:49933712	63.95	5.36	21.29	5.46	1.22	2.73
T126G	SNV	chr3:49933712	64.92	4.31	20.42	4.42	2.63	3.3
T126C	SNV	chr3:49933711	61.73	6.81	23.17	4.67	1.47	2.15
T126A	SNV	chr3:49933711	55.86	6.58	26.36	7.31	1.64	2.25
G127T	SNV	chr3:49933710	56.91	6.99	25.18	5.76	3.15	2.01
G127A	SNV	chr3:49933710	68.75	4.5	18.41	5.26	0.96	2.12
G128T	SNV	chr3:49933710	63.61	3.84	22.9	4.18	2.62	2.84
G128C	SNV	chr3:49933709	68.29	9.12	16.5	1.99	2.01	2.09
G128A	SNV	chr3:49933709	66.78	6.18	19.24	3.97	1.36	2.47
C129T	SNV	chr3:49933709	63.55	6.01	21.14	5.07	1.95	2.28
C129G	SNV	chr3:49933709	59.42	9.21	19	10.25	0.37	1.75
C129A	SNV	chr3:49933708	63.42	9.13	18.47	5.3	1.77	1.92
CT130C	DEL	chr3:49933708	78.93	3.52	11.15	4.44	1.25	0.72
T130G	SNV	chr3:49933708	64.96	6.55	21.1	4.37	1.41	1.61
T130C	SNV	chr3:49933707	64.39	8.27	19.47	3.72	1.81	2.35
T130A	SNV	chr3:49933707	60.06	5.7	24.72	5.3	1.9	2.33
T131G	SNV	chr3:49933707	60.75	4.49	24.15	6.93	2.25	1.43
T131C	SNV	chr3:49933706	60.45	5.9	25.29	4.65	1.8	1.92
T131A	SNV	chr3:49933706	60.02	8.22	21.96	6.11	1.73	1.96
T132G	SNV	chr3:49933706	67.13	5.04	20.69	3.17	0.84	3.14
T132C	SNV	chr3:49933706	65.88	5.57	20.62	4.28	2.02	1.63
T132A	SNV	chr3:49933705	59.35	4.72	24.14	7.2	3.06	1.53
TC133T	DEL	chr3:49933705	69.8	4.28	18.47	3.99	1.07	2.39
C133T	SNV	chr3:49933705	61.28	7.08	24.39	4.58	1.45	1.21
C133G	SNV	chr3:49933704	63.74	10.63	20.79	2.52	1.04	1.28
C133A	SNV	chr3:49933704	67.69	7.68	17.08	5.2	0.45	1.9
G134T	SNV	chr3:49933704	70.99	5.54	16.73	4.61	1.11	1.02
G134C	SNV	chr3:49933703	67.51	5.46	19.82	4.8	0.9	1.5
G134A	SNV	chr3:49933703	61.27	6.07	24.01	4.66	1.86	2.14
C135T	SNV	chr3:49933703	58.53	6.95	24.22	6.78	1.16	2.37
C135A	SNV	chr3:49933702	77.96	3.1	12.87	3.86	1.41	0.8
T136C	SNV	chr3:49933702	64.43	6.2	19.66	5.49	1.77	2.45
T136A	SNV	chr3:49933701	60.12	6.83	24.37	5.18	1.6	1.91
T137G	SNV	chr3:49933701	64.57	6.83	18.01	5.31	2.61	2.67
T137C	SNV	chr3:49933701	63.41	5.53	22.29	5.05	1.5	2.23
T137A	SNV	chr3:49933701	61.14	8.5	20.59	6.41	1.48	1.88
TC138T	DEL	chr3:49933700	65.02	5.98	20.82	4.54	1.43	2.21
C138T	SNV	chr3:49933699	56.9	5.79	28.34	5.49	1.6	1.88
C139T	SNV	chr3:49933699	60.3	6.32	25.22	5.04	1.38	1.75
C139A	SNV	chr3:49933698	59.45	7.81	23.54	4.93	1.91	2.36
T140G	SNV	chr3:49933698	52.41	12.11	22.12	9.57	0.55	3.23
T140C	SNV	chr3:49933698	60.3	6.68	24.53	4.74	1.44	2.31
T140A	SNV	chr3:49933697	61.36	6.72	23.19	5.16	1.6	1.97
A141T	SNV	chr3:49933697	64.46	4.91	22.53	5.12	1	1.98
A141G	SNV	chr3:49933697	64.78	6.68	19.8	5.42	1.53	1.8
A141C	SNV	chr3:49933697	63.35	6.48	21.34	4.08	1.33	3.42
A141AC	IN	chr3:49933697	64.29	5.72	21.4	5.4	1.84	1.34
AC142A	DEL	chr3:49933696	65.47	5.33	21.23	4.02	1.91	2.06
C142T	SNV	chr3:49933696	61.45	6.14	23.49	4.92	1.87	2.13
C142G	SNV	chr3:49933696	63.83	5.99	20.99	3.93	1.9	3.37
C142A	SNV	chr3:49933695	55.4	9.92	23.68	8.01	1.86	1.12
C143T	SNV	chr3:49933695	63.09	6.48	23.33	3.92	1.38	1.8
C143G	SNV	chr3:49933695	61.05	6.92	23.41	4.39	2.17	2.06
C143A	SNV	chr3:49933694	67.54	6.8	17.99	3.79	1.72	2.15
C144T	SNV	chr3:49933694	68.39	5.06	19.6	4.16	1.27	1.51
C144G	SNV	chr3:49933694	63.83	14.62	12.17	4.4	3.51	1.48
C144A	SNV	chr3:49933693	70.1	6.68	13.96	4.43	2.47	2.36
C145T	SNV	chr3:49933693	66.94	5.87	20.01	3.59	1.42	2.16
C145G	SNV	chr3:49933693	64.7	5.94	21.76	3.68	1.84	2.07
C145A	SNV	chr3:49933692	57.49	7.89	26.32	5.22	0.65	2.43
C146T	SNV	chr3:49933692	63.72	5.96	22.13	4.63	1.29	2.26
C146A	SNV	chr3:49933692	61.74	6.33	18.52	7.37	1.04	5
CA147C	DEL	chr3:49933691	41.1	9.25	40.37	4.84	0.34	4.11
A147T	SNV	chr3:49933691	65.58	5.34	20.05	5.48	1.47	2.08
A147G	SNV	chr3:49933691	63.24	6.81	22.02	4.28	1.55	2.1
A147C	SNV	chr3:49933691	63.85	6.34	22.11	3.9	1.7	2.11
A147AC	IN	chr3:49933691	66.8	3.88	21.19	4.6	1.86	1.67
AC148A	DEL	chr3:49933690	66.05	6.26	19.57	4.57	1.43	2.12
C148T	SNV	chr3:49933690	66.07	6.03	19.62	4.66	1.43	2.2
C148G	SNV	chr3:49933690	60.85	8.21	24.4	2.95	1.65	1.94
C148A	SNV	chr3:49933689	31.78	9.05	48.61	3.75	1.14	5.68
C149T	SNV	chr3:49933689	67.7	6.23	17.92	4.4	1.43	2.32
C149G	SNV	chr3:49933689	62.93	7.86	18.58	5.91	1.37	3.36
C149A	SNV	chr3:49933688	62.77	7.48	21.1	4.36	2.12	2.16
C150T	SNV	chr3:49933688	61.96	9.27	20.82	4.26	1.71	1.98
C150G	SNV	chr3:49933688	73.79	5.49	13.47	1.24	1.98	4.04
C150A	SNV	chr3:49933687	63.39	7.41	21.1	4.01	1.99	2.11
C151T	SNV	chr3:49933687	57.9	8.23	24.46	5.93	1.21	2.26
C151A	SNV	chr3:49933686	61.65	7.32	21.63	6.93	1.25	1.22
C151CT	IN	chr3:49933686	53.01	6.36	29.95	8.61	0.83	1.25
A152T	SNV	chr3:49933686	66.63	6.37	20.31	3.85	1.16	1.69
A152G	SNV	chr3:49933686	60.78	8.19	22.33	4.55	1.54	2.62
A152C	SNV	chr3:49933685	66.95	6.29	16.05	6.56	1.51	2.64
AT153A	DEL	chr3:49933685	71.45	4.67	15.96	3.98	2.17	1.77
T153C	SNV	chr3:49933684	60.63	6.93	24.49	4.44	1.59	1.91
T153A	SNV	chr3:49933684	67.02	6.26	19.23	3.8	1.62	2.07
C154T	SNV	chr3:49933684	60.77	5.78	24.97	5.03	1.47	1.97
C154G	SNV	chr3:49933683	54.7	11.16	24.87	4.72	2.74	1.82
C154A	SNV	chr3:49933683	63.68	4.76	24.82	3.88	1.34	1.51
C155T	SNV	chr3:49933683	61.54	6.17	23.51	5.33	1.79	1.66
C155G	SNV	chr3:49933683	67.74	5.75	18.88	3.78	2.15	1.7
C155A	SNV	chr3:49933682	61.09	7.9	22.13	4.69	1.91	2.28
CA156C	DEL	chr3:49933682	68.47	3.91	17.78	4.81	1.34	3.69
A156T	SNV	chr3:49933682	62.67	5.52	22.68	5.25	1.73	2.15
A156G	SNV	chr3:49933682	60.81	7.95	22.86	4.59	1.44	2.34
A156C	SNV	chr3:49933681	65.18	4.76	20.25	5.96	1.34	2.5
AC157A	DEL	chr3:49933681	64.98	6.24	20.78	4.6	1.28	2.12
C157T	SNV	chr3:49933681	68.22	5.28	18.79	4.06	1.64	2.01
C157G	SNV	chr3:49933680	64.44	5.93	21.81	3.83	2.61	1.38
C157A	SNV	chr3:49933680	54.88	6.75	26.42	8.19	0.9	2.86
C158T	SNV	chr3:49933680	65.21	5.95	20.25	5.2	1.76	1.62
C158G	SNV	chr3:49933679	60.85	6.59	24.41	4.8	1.74	1.62
C158A	SNV	chr3:49933679	57.14	7.1	25.2	5.79	2.06	2.7
C159T	SNV	chr3:49933679	61.61	5.2	24.81	4.75	1.76	1.88
C159G	SNV	chr3:49933679	61.28	7.6	20.85	3.43	5.13	1.71
C159A	SNV	chr3:49933678	73.17	3.74	15.33	4.65	1.78	1.33
CA160C	DEL	chr3:49933678	68.59	5.24	18.65	4.16	2.32	1.04
A160T	SNV	chr3:49933678	67.13	6.29	19.35	3.42	1.36	2.46
A160G	SNV	chr3:49933677	67.86	8.03	16.6	3.22	2.1	2.19
A160C	SNV	chr3:49933677	62.87	4.76	23.46	4.99	1.17	2.75
G161T	SNV	chr3:49933677	62.29	6.65	23.23	3.15	1.65	3.04
G161C	SNV	chr3:49933676	65.55	4.48	23.99	2.26	1.18	2.53
G161A	SNV	chr3:49933676	62.65	5.82	22.56	5.29	1.6	2.09
T162G	SNV	chr3:49933676	67.98	4.69	19.7	4.08	1.58	1.98
T162C	SNV	chr3:49933675	66.28	5.71	19.36	4.8	1.8	2.05
T162A	SNV	chr3:49933675	64.18	6.99	20.67	5.38	1.25	1.53
G163T	SNV	chr3:49933675	60.62	5.07	26.49	6.14	0.56	1.12
G163C	SNV	chr3:49933674	56.68	5.04	28.4	5.53	2.05	2.3
G163A	SNV	chr3:49933674	64.18	5.72	21.69	4.9	1.51	2
C164T	SNV	chr3:49933674	62.5	6.84	22.56	4.76	1.51	1.82
C164G	SNV	chr3:49933673	70.92	1.59	17.13	3.98	4.19	2.2
C164A	SNV	chr3:49933673	62.58	7.46	22.2	3.83	1.26	2.67
C165T	SNV	chr3:49933673	57.96	5.22	28.2	4.99	1.67	1.95
C165G	SNV	chr3:49933673	62.98	4.59	23.54	2.75	4.22	1.92
C165A	SNV	chr3:49933672	71.2	6.79	13.12	6.21	0.61	2.06
CA166C	DEL	chr3:49933672	52.54	18.99	18.96	5.82	0.6	3.09
A166T	SNV	chr3:49933672	65.6	6.67	20.64	3.69	1.6	1.8
A166G	SNV	chr3:49933671	65.71	6.1	19.81	4.43	1.57	2.38
A166C	SNV	chr3:49933671	59.29	6.88	26.83	4.16	1.25	1.58
A167T	SNV	chr3:49933671	62.07	6.57	23.34	4.87	1.5	1.66
A167G	SNV	chr3:49933670	56.97	6.57	27.46	5.43	1.49	2.08
AC168A	DEL	chr3:49933670	56.69	6.94	24.31	7.51	3.56	0.99
C168T	SNV	chr3:49933670	64.71	5.2	21.31	5.5	1.35	1.91
C168G	SNV	chr3:49933669	58.64	6.93	23.45	6.02	2.22	2.74
C169T	SNV	chr3:49933669	61.23	5.57	24	4.98	1.88	2.34
C169G	SNV	chr3:49933669	56.91	12.36	23.04	3.35	1.3	3.04
C169A	SNV	chr3:49933668	68.01	7.4	16.73	4.4	1.78	1.69
T170G	SNV	chr3:49933668	68.65	6.61	16.4	4.27	2.29	1.79
T170C	SNV	chr3:49933668	61.47	7.47	22.15	4.78	2.01	2.12
T170A	SNV	chr3:49933667	61.78	6.23	24.32	3.71	2.58	1.38
A171T	SNV	chr3:49933667	64.82	7.15	19.55	4.83	1.32	2.32
A171G	SNV	chr3:49933667	68.04	8.18	15.62	4.49	1.46	2.2
A171C	SNV	chr3:49933666	55.01	11.38	24.83	4.74	2.18	1.86
G172T	SNV	chr3:49933666	58.91	8.67	22.37	5.44	1.54	3.06
G172A	SNV	chr3:49933666	63.99	7.11	20.55	4.78	1.73	1.85
GT173G	DEL	chr3:49933665	95.67	0.75	2.62	0.84	0.02	0.09
T173G	SNV	chr3:49933665	63	8.53	19.57	6.08	1.26	1.57
T173C	SNV	chr3:49933665	65.38	5.21	21.55	4.35	1.44	2.07
T173A	SNV	chr3:49933664	60.46	6.8	22.79	6.27	1.72	1.96
T174G	SNV	chr3:49933664	54.49	10.34	31.17	2.47	0.97	0.56
T174C	SNV	chr3:49933664	59.9	6.07	24.73	4.75	1.98	2.57
T174A	SNV	chr3:49933663	66.98	6.08	19.02	4.21	1.58	2.13
C175T	SNV	chr3:49933663	58.99	6.72	26.55	4.39	1.45	1.89
C175G	SNV	chr3:49933663	69.09	3.57	21.49	3.08	0.19	2.59
C176T	SNV	chr3:49933662	65.34	6.24	20.91	4.28	1.49	1.75
C176A	SNV	chr3:49933662	56.83	6.69	25.44	6.81	1.72	2.52
A177T	SNV	chr3:49933661	57.53	5.2	28.63	5.96	1.46	1.22
A177G	SNV	chr3:49933661	63.86	5.22	22.82	3.81	2.78	1.52
A177C	SNV	chr3:49933661	56.31	9.09	27.2	4.92	0.98	1.49
C178T	SNV	chr3:49933660	64.87	7.67	19.75	4.25	0.66	2.79
C178G	SNV	chr3:49933660	66.11	11.27	16.35	2.21	1.39	2.67
C178A	SNV	chr3:49933660	67.64	5.89	18.01	4.54	1.75	2.18
T179G	SNV	chr3:49933659	65.75	6.94	20.93	3.41	0.96	2.02
T179C	SNV	chr3:49933659	62.85	6.63	21.4	5.25	1.98	1.89
T179A	SNV	chr3:49933659	60.86	5.56	24.81	5.82	1.08	1.87
G180T	SNV	chr3:49933658	57.02	6.38	27.08	5.68	1.66	2.18
G180A	SNV	chr3:49933658	54.98	5.13	33.65	4.32	0.5	1.42
A181T	SNV	chr3:49933657	57.07	5.27	30.13	4.32	1.25	1.96
A181G	SNV	chr3:49933657	65.63	7.27	20.73	2.86	1.55	1.95
A182T	SNV	chr3:49933657	66.5	9.01	17.54	4.2	1.34	1.41
A182G	SNV	chr3:49933656	67.37	4.38	19.54	4.2	1.49	3.02
A182C	SNV	chr3:49933656	49.07	3.99	35.6	7.59	0.91	2.84
G183T	SNV	chr3:49933656	68.28	4.91	17.57	6.47	1.12	1.65
G183C	SNV	chr3:49933655	53.2	4.72	34.43	4.47	2.02	1.17
G183A	SNV	chr3:49933655	61.14	6.73	23.69	5.01	1.55	1.88
C184T	SNV	chr3:49933655	66.12	8.09	16.72	5.47	1.2	2.39
C184A	SNV	chr3:49933654	67.37	7.68	16.55	4.32	2.82	1.26
C185A	SNV	chr3:49933654	61.23	7.12	18.93	4.78	4.37	3.57
T186G	SNV	chr3:49933653	69.82	2.63	20.54	5.13	1.35	0.53
T186C	SNV	chr3:49933653	62.78	6.42	22.42	5.33	1.07	1.99
T186A	SNV	chr3:49933652	61.51	5.85	23.6	5.28	1.59	2.16
G187T	SNV	chr3:49933652	58.5	6.18	28.57	4.79	1.23	0.73
G187A	SNV	chr3:49933652	61.06	7.44	22.48	5.79	1.5	1.73
A188T	SNV	chr3:49933651	63.38	7.01	22.24	4.34	1.21	1.82
A188G	SNV	chr3:49933651	62.01	5.06	24.44	4.68	1.47	2.34
A188C	SNV	chr3:49933650	69.16	5.01	18.43	4.24	1.39	1.76
AG189A	DEL	chr3:49933650	45.89	4.29	33.92	11.24	1.45	3.21
G189T	SNV	chr3:49933650	63.34	6.29	24.57	2.61	1.75	1.44
G189C	SNV	chr3:49933650	56.19	6.34	28.81	5.24	1.62	1.8
G189A	SNV	chr3:49933649	65.31	6.83	19.65	5.41	1.53	1.28
G190T	SNV	chr3:49933649	62.29	3.51	27.09	3.74	1.86	1.51
G190A	SNV	chr3:49933649	62.05	5.32	21.36	7.43	1.18	2.65
A191T	SNV	chr3:49933648	59.4	5.77	27.1	4.87	1.03	1.82
A191G	SNV	chr3:49933648	59.34	4.53	27.74	4.91	1.66	1.82
A191C	SNV	chr3:49933647	59.11	4.29	26.57	5.27	2.54	2.21
G192T	SNV	chr3:49933647	66.54	6.83	18.38	5.62	1.43	1.19
G192C	SNV	chr3:49933647	57.7	6.72	26.35	5.26	2.06	1.91
G192A	SNV	chr3:49933646	58.83	7.07	24.79	5.57	1.25	2.49
C193T	SNV	chr3:49933646	65.19	6.24	19.37	5.99	1.32	1.88
C193G	SNV	chr3:49933646	64.17	6.68	21.07	5.12	1.32	1.65
C193A	SNV	chr3:49933645	61.57	2.88	25.65	4.75	3.12	2.04
A194T	SNV	chr3:49933645	60.71	2.95	27.13	5.73	1.77	1.72
A194G	SNV	chr3:49933645	63.4	6.16	22.72	4.23	1.43	2.05
T195G	SNV	chr3:49933644	69.32	4.91	20.79	2.58	1.49	0.91
T195C	SNV	chr3:49933644	59.1	6.31	25.55	5.35	1.42	2.27
T195A	SNV	chr3:49933643	64.93	7.94	18.78	4.81	1.44	2.09
G196T	SNV	chr3:49933643	64.83	7.12	20.01	4.79	1.11	2.14
G196C	SNV	chr3:49933643	66.85	4.85	20.16	3.67	2.67	1.8
G196A	SNV	chr3:49933642	63.77	5.78	22.04	4.97	1.41	2.02
C197T	SNV	chr3:49933642	64.09	6.47	22.31	4.47	1.34	1.32
C197G	SNV	chr3:49933642	54.14	10.55	24.66	5.05	1.9	3.69
C197A	SNV	chr3:49933641	61.54	6.49	22.98	5.07	1.86	2.05
C198T	SNV	chr3:49933641	61.27	6.02	24.38	4.98	1.61	1.74
C198A	SNV	chr3:49933641	57.35	8.26	24.12	5.67	2.19	2.41
A199T	SNV	chr3:49933640	63.68	5.45	22.56	4.27	2.2	1.84
A199G	SNV	chr3:49933640	64.84	4.27	21.45	5.5	1.72	2.21
A199C	SNV	chr3:49933640	63.96	7.02	17.23	7.5	1.83	2.45
AT200A	DEL	chr3:49933639	73.63	4.67	13.23	6.39	0.66	1.43
T200C	SNV	chr3:49933639	65.17	6.81	19.54	4.71	1.47	2.3
T200A	SNV	chr3:49933639	65.5	6.32	19.51	4.46	2.48	1.73
T201G	SNV	chr3:49933639	68.93	9.4	14.43	3.13	1.72	2.38
T201C	SNV	chr3:49933638	65.5	6.74	18.46	5.24	2.11	1.95
T201A	SNV	chr3:49933638	64.62	7.17	18.87	5.3	1.44	2.6
A202T	SNV	chr3:49933637	64.71	7.4	21.49	3.52	1.11	1.76
A202G	SNV	chr3:49933637	60.91	6.64	23.26	5.07	1.73	2.38
A202C	SNV	chr3:49933637	64.97	6.11	19.3	4.61	1.18	3.83
A203T	SNV	chr3:49933636	62.28	6.11	22.58	5.5	1.31	2.22
A203G	SNV	chr3:49933636	58.15	5.83	29	3.89	1.24	1.88
G204T	SNV	chr3:49933636	65.45	1.31	20.93	8.77	1.22	2.33
G204C	SNV	chr3:49933635	59.78	6.34	23.43	4.63	2.25	3.57
G204A	SNV	chr3:49933635	70.73	8.18	14.04	4.1	1.22	1.73
T205G	SNV	chr3:49933634	65.58	8	19.99	2.4	1.87	2.15
T205C	SNV	chr3:49933634	67.66	5.38	18.99	4.32	1.37	2.3
T205A	SNV	chr3:49933634	65.09	5.94	22.4	3.53	1.29	1.74
T206G	SNV	chr3:49933633	51.67	8.48	30.76	5.14	2.72	1.24
T206C	SNV	chr3:49933633	64.08	6.16	21.43	4.46	1.62	2.25
T206A	SNV	chr3:49933633	60.36	6.23	23.66	5.31	2.27	2.17
T207G	SNV	chr3:49933632	64.56	4.25	23.83	3.93	1.71	1.72
T207C	SNV	chr3:49933632	67.44	5.2	19.81	4.95	0.84	1.76
T207A	SNV	chr3:49933632	67.03	6.24	21.65	3.35	0.93	0.8
G208T	SNV	chr3:49933631	54.7	8.03	26.42	7.23	0.99	2.64
G208A	SNV	chr3:49933631	66.3	5.97	20.18	4.45	1.38	1.72
A209T	SNV	chr3:49933631	55.73	7.62	26.98	5.77	1.28	2.62
A209G	SNV	chr3:49933630	58.5	5.23	28.92	5	0.88	1.47
A209C	SNV	chr3:49933630	69.27	5.4	16.58	4.42	2.84	1.49
G210T	SNV	chr3:49933629	50.79	1.87	39.42	3.89	1.33	2.7
G210C	SNV	chr3:49933629	61.62	4.54	24.26	5.68	1.25	2.65
G210A	SNV	chr3:49933629	50.79	6.63	33.21	5.49	0.7	3.19
G211T	SNV	chr3:49933628	0.88	0.34	82.45	11.47	0.24	4.62
G211C	SNV	chr3:49933628	1.08	0.85	75.51	15.42	0.06	7.09
G211A	SNV	chr3:49933628	1.07	0.27	77.11	15.22	0.09	6.23
T212C	SNV	chr3:49933627	18.62	1.58	68.05	8.88	0.45	2.43
T212A	SNV	chr3:49933627	1.21	0.25	84.95	12.73	0.23	0.62
A213T	SNV	chr3:49933626	37.38	1.98	50.04	7.17	0.82	2.61
A213G	SNV	chr3:49933626	57.76	6.71	26.69	4.91	1.87	2.06
A214T	SNV	chr3:49933625	56.48	4.93	30.25	5.52	0.96	1.87
A214G	SNV	chr3:49933625	55.96	6.18	29.29	4.98	1.11	2.48
A214C	SNV	chr3:49933624	64.02	2.14	22.4	6.47	3.73	1.24
G215C	SNV	chr3:49933624	47.22	3.2	42.47	4.31	0.44	2.36
G215A	SNV	chr3:49933624	50.86	3.39	37.97	4.77	0.47	2.55
T216G	SNV	chr3:49933623	45.5	5.18	41.61	3.93	3.14	0.64
T216C	SNV	chr3:49933623	60.31	4.75	27.51	4.92	0.63	1.88
T216A	SNV	chr3:49933622	59.94	5.93	26.39	4.62	1.47	1.65
G217T	SNV	chr3:49933622	61.76	7.18	22.31	4.28	1.7	2.77
G217C	SNV	chr3:49933622	61.61	8.99	18.44	6.98	2.75	1.24
G217A	SNV	chr3:49933621	65.5	4.85	21.33	4.07	2.08	2.18
GT218G	DEL	chr3:49933621	68.41	17.24	9.61	3.57	0.38	0.8
T218G	SNV	chr3:49933621	61.51	3.9	28.32	2.1	0.65	3.52
T218C	SNV	chr3:49933621	59.95	5.21	26.15	4.97	1.74	1.99
T218A	SNV	chr3:49933620	61.72	7.16	22.1	4.13	2.62	2.28
TA219T	DEL	chr3:49933620	50.28	9.59	31.94	3.99	1.07	3.13
A219T	SNV	chr3:49933620	59.22	5.57	26.82	4.39	1.5	2.5
A219G	SNV	chr3:49933620	66.01	5.74	20.05	4.67	1.59	1.94
A220T	SNV	chr3:49933619	61.77	11.27	18.86	4.14	1.69	2.27
A220G	SNV	chr3:49933619	63.9	5.22	21.6	5.35	1.94	1.99
A220C	SNV	chr3:49933618	64.35	8.29	17.66	5.36	2.03	2.31
AG221A	DEL	chr3:49933618	53.72	12.28	25.56	4.76	1.17	2.5
G221T	SNV	chr3:49933618	60.98	7	22.64	6.19	0.95	2.24
G221A	SNV	chr3:49933618	54.74	6.65	29.92	5.29	1.52	1.88
G222T	SNV	chr3:49933617	59.55	4.47	27.05	5.52	1.93	1.47
G222A	SNV	chr3:49933617	59.66	4.65	27.05	5.49	1.4	1.75
G223T	SNV	chr3:49933616	69.34	7.11	15.69	4.88	0.9	2.08
G223A	SNV	chr3:49933616	53.91	5.88	29.72	6.49	2	2
A224T	SNV	chr3:49933615	60.15	8.32	24.22	4.61	1.36	1.34
A224G	SNV	chr3:49933615	62.62	8.68	19.22	5.38	1.84	2.27
T225C	SNV	chr3:49933614	65.7	7.15	17.84	6.16	1.53	1.62
T225A	SNV	chr3:49933614	57.25	5.2	26.19	6.01	1.26	4.09
TA226T	DEL	chr3:49933613	51.99	24.88	14.96	5.94	1.16	1.07
A226T	SNV	chr3:49933613	58.46	8.49	23.63	6.18	1.09	2.16
A226G	SNV	chr3:49933613	67.62	7.51	16.87	4.08	1.66	2.26
A226C	SNV	chr3:49933612	58.67	10.82	22.34	2.88	2.05	3.24
A226AT	IN	chr3:49933612	50.44	5.68	25.06	13.08	3.92	1.82
A226AG	IN	chr3:49933612	65.83	3.67	22.61	5.92	1.01	0.96
AG227A	DEL	chr3:49933612	60.4	1.79	31.96	3.2	1.96	0.69
G227T	SNV	chr3:49933612	59.31	6.71	23.27	6.97	2.13	1.61
G227C	SNV	chr3:49933612	53.46	8.63	21.58	12.56	0.73	3.04
G227A	SNV	chr3:49933611	56.64	7.44	26.65	5.57	1.25	2.44
G228T	SNV	chr3:49933611	49.23	6.5	36.78	3.69	2.01	1.79
G228A	SNV	chr3:49933611	45.84	11.68	32.97	6.06	0.68	2.79
G228GT	IN	chr3:49933610	52.67	12.53	24.13	6.5	1.55	2.62
G229T	SNV	chr3:49933610	51.53	11.81	29.62	3.93	1.04	2.08
G229C	SNV	chr3:49933610	38.26	11.64	40.2	2.99	3.85	3.07
G229A	SNV	chr3:49933609	46.73	11.31	34.31	5.75	0.8	1.08
G230T	SNV	chr3:49933609	52.53	13.39	27.61	2.44	1.42	2.62
G230C	SNV	chr3:49933609	49.58	12.81	31.05	3.58	0.98	2
G230A	SNV	chr3:49933608	55.96	8.19	27.74	4.84	1.19	2.08
C231T	SNV	chr3:49933608	59.64	7.01	24.1	5.21	1.74	2.3
C231A	SNV	chr3:49933608	66.4	4.71	18.17	7.05	1.5	2.18
CA232C	DEL	chr3:49933607	70.17	5.41	15.75	4.9	1.38	2.39
A232T	SNV	chr3:49933607	63.19	7.14	19.7	6.45	1.35	2.18
A232G	SNV	chr3:49933607	67.65	3.77	18.78	4.7	2.95	2.14
A232C	SNV	chr3:49933606	60.95	9	20.62	3.75	2.97	2.71
AG233A	DEL	chr3:49933606	60.78	6.99	24.52	3.89	1.48	2.33
G233T	SNV	chr3:49933606	53.07	13.65	26.12	3.66	1.77	1.73
G233C	SNV	chr3:49933606	54.6	10.15	25.32	6.06	1.48	2.39
G233A	SNV	chr3:49933605	49.81	13.77	28.01	4.25	1.42	2.74
G234T	SNV	chr3:49933605	55.71	12.95	23.73	3.98	1.3	2.33
G234C	SNV	chr3:49933605	75.1	7.67	13.56	2.39	0.28	1.01
G234A	SNV	chr3:49933604	54.34	14.16	23.25	4.38	0.93	2.94
G235T	SNV	chr3:49933604	53.88	12.72	25.67	4.2	1.05	2.49
G235A	SNV	chr3:49933604	57.03	9.09	24.88	4.37	1.27	3.35
A236T	SNV	chr3:49933603	63.09	6.94	22.06	4.52	1.19	2.2
A236G	SNV	chr3:49933603	67.25	6.58	16.89	5.22	1.84	2.22
A236C	SNV	chr3:49933602	44.51	6.85	36.83	3.43	6.64	1.74
C237T	SNV	chr3:49933602	65.84	5.74	19.75	4.31	1.92	2.43
C237G	SNV	chr3:49933602	59.75	5.96	23.37	7.26	1.57	2.08
A238T	SNV	chr3:49933601	61.18	6.84	21.66	5.87	2.17	2.28
A238G	SNV	chr3:49933601	64.66	6.16	18.49	5.96	2.5	2.23
A238C	SNV	chr3:49933600	60.6	5.33	22.94	7.44	2.43	1.26
G239T	SNV	chr3:49933600	70.02	5.94	14.87	4.87	2.89	1.42
G239C	SNV	chr3:49933600	64.09	6.76	21.21	4.81	1.24	1.89
G239A	SNV	chr3:49933599	62.69	6.87	21.79	4.55	2.02	2.08
T240C	SNV	chr3:49933599	62.56	7.04	21.75	4.96	1.81	1.87
T240A	SNV	chr3:49933599	60.36	6.85	23.72	5.17	2.01	1.89
T241G	SNV	chr3:49933598	69.77	5.16	17.44	5	1.02	1.6
T241C	SNV	chr3:49933598	66.17	4.86	21.26	4.08	1.66	1.98
T241A	SNV	chr3:49933597	59.53	8.27	23.69	4.75	1.2	2.56
TG242T	DEL	chr3:49933597	64.95	5.05	21.27	5.07	1.51	2.15
G242T	SNV	chr3:49933597	65.22	6.55	21.74	4.34	0.63	1.51
G242C	SNV	chr3:49933597	64.88	2.32	24.88	4.64	0.98	2.29
G242A	SNV	chr3:49933596	55.99	5.31	31.46	4.21	1.39	1.64
G243T	SNV	chr3:49933596	61.56	4.4	25.85	4.8	1.49	1.9
G243A	SNV	chr3:49933596	42.89	8.04	40.22	3.99	1.62	3.25
G244T	SNV	chr3:49933595	65.54	3.15	22.48	5.07	1.75	2
G244A	SNV	chr3:49933595	65.44	4.09	23.94	3.38	1.22	1.94
G245T	SNV	chr3:49933594	65.48	5.82	20.17	4.95	1.36	2.22
G245C	SNV	chr3:49933594	53.99	9.27	25.21	8.65	1.4	1.47
G245A	SNV	chr3:49933593	61.61	5.8	24.18	4.75	1.72	1.93
GA246G	DEL	chr3:49933593	50.52	13.87	28.04	3.54	1.29	2.74
A246T	SNV	chr3:49933593	64.24	6.43	21.35	4.5	1.31	2.17
A246G	SNV	chr3:49933593	49.31	17.98	25.02	3.9	1.09	2.7
T247G	SNV	chr3:49933593	59.04	7.4	25.89	5.12	0.57	1.98
T247C	SNV	chr3:49933592	61.77	6.96	21.88	6.48	0.75	2.16
T247A	SNV	chr3:49933592	62.33	5.27	23.72	5.43	1.33	1.91
C248T	SNV	chr3:49933591	61.15	6.18	22.6	4.68	2.63	2.76
C248G	SNV	chr3:49933591	46.71	3.9	15.52	5.61	24.35	3.93
C248A	SNV	chr3:49933591	62.24	8.78	19.44	5.3	1.33	2.9
T249G	SNV	chr3:49933590	62.09	10.05	16.34	4.79	3.35	3.38
T249C	SNV	chr3:49933590	59.15	7.89	24.29	5.19	1.56	1.92
T249A	SNV	chr3:49933590	63.74	5.75	21.38	5.11	1.78	2.23
G250T	SNV	chr3:49933589	62.42	5.94	22.54	5.09	2.03	1.99
G250C	SNV	chr3:49933589	60.3	5.12	25.73	5.28	1.87	1.69
G250A	SNV	chr3:49933589	63.77	5.76	22.83	3.48	2.16	2
GA251G	DEL	chr3:49933588	54.46	8.8	28.74	2.85	2.46	2.69
A251T	SNV	chr3:49933588	57.07	6.61	26.45	5.31	1.65	2.92
A251G	SNV	chr3:49933588	57.29	6.8	25.15	6.04	2.29	2.43
A251C	SNV	chr3:49933588	61.36	4.18	24.13	9.01	1.04	0.28
A252T	SNV	chr3:49933587	57.47	9.16	24.79	5.1	1.27	2.21
A252G	SNV	chr3:49933587	54.87	13.79	22.65	4.34	1.4	2.95
A252C	SNV	chr3:49933587	67.23	4.08	19.05	6.09	2.47	1.08
A253T	SNV	chr3:49933586	62.99	6.65	21.34	5.54	1.62	1.85
A253G	SNV	chr3:49933586	59.86	8.55	22.31	4.32	1.85	3.11
A253C	SNV	chr3:49933586	67.44	6.99	18.63	3.39	1.53	2.03
G254T	SNV	chr3:49933585	40.37	10.89	38.49	7.86	0.35	2.05
G254C	SNV	chr3:49933585	50.61	10.22	28.48	4.87	2.34	3.47
G254A	SNV	chr3:49933585	63.38	3.81	23.93	3.97	2.49	2.41
T255G	SNV	chr3:49933584	60.71	4.84	26.28	2.72	4.41	1.05
T255C	SNV	chr3:49933584	61.69	5.5	23.83	5.63	1.25	2.1
T255A	SNV	chr3:49933584	68.4	4.75	19.03	3.99	2.12	1.72
A256T	SNV	chr3:49933583	65.78	5.29	19.66	6.11	1.2	1.95
A256G	SNV	chr3:49933583	66.84	4.11	18.65	6.93	1.92	1.55
AG257A	DEL	chr3:49933583	60.45	7.18	23.25	5.43	1.59	2.11
G257T	SNV	chr3:49933582	69.43	5.27	16.51	4.65	1.6	2.55
G257A	SNV	chr3:49933582	65.84	5.05	21.73	3.58	1.97	1.84
G258T	SNV	chr3:49933582	64.19	5.58	20.33	6.39	1.17	2.34
G258A	SNV	chr3:49933581	57.57	10.89	22.85	4.91	1.13	2.65
G259T	SNV	chr3:49933581	70.15	1.75	17.11	5.85	2.18	2.96
G259C	SNV	chr3:49933580	80.54	1.58	6.07	5.02	5.68	1.1
G259A	SNV	chr3:49933580	62.79	5.24	23.21	4.04	2.81	1.9
G260C	SNV	chr3:49933579	63.69	7.17	20.9	3.88	1.49	2.87
G260A	SNV	chr3:49933579	61.86	7.94	21.67	3.51	2.44	2.58
GC261G	DEL	chr3:49933579	60.32	3.96	24.84	7.87	0.38	2.63
C261T	SNV	chr3:49933578	61.83	6.44	23.91	4.92	1.41	1.51
C261G	SNV	chr3:49933578	59.43	9.15	23.35	4.6	0.84	2.61
C261A	SNV	chr3:49933578	22.37	41.29	29.55	4.36	0.21	2.22
C262T	SNV	chr3:49933577	66.29	3.33	19.52	7.33	1.19	2.34
C262G	SNV	chr3:49933577	74.97	5.49	12.67	2.34	3.19	1.34
C262A	SNV	chr3:49933577	61.69	4.94	23.39	5.55	2.18	2.25
A263T	SNV	chr3:49933576	66.67	5.55	19.98	3.85	1.72	2.23
A263G	SNV	chr3:49933576	62.85	6.17	22.92	4.33	2.06	1.66
A263C	SNV	chr3:49933576	69.04	4.52	16.3	6.47	0.81	2.86
G264T	SNV	chr3:49933575	72.49	3.56	16.13	3.8	2.49	1.54
G264C	SNV	chr3:49933575	71.38	1.53	16.59	7.21	1.99	1.3
G264A	SNV	chr3:49933575	70.9	3.59	17.38	5	1.54	1.6
C265T	SNV	chr3:49933574	62.82	5.18	21.09	6.81	1.68	2.41
C265G	SNV	chr3:49933574	58.77	2.9	25.45	8.22	3.07	1.59
C265A	SNV	chr3:49933574	56.43	6.82	27.03	6.01	2.3	1.4
C266T	SNV	chr3:49933573	72.86	2.5	17.38	4.59	0.96	1.71
C266G	SNV	chr3:49933573	43.57	10.82	24.06	16.4	2.03	3.12
C266A	SNV	chr3:49933573	54	4.3	24.96	12.58	1.61	2.55
T267C	SNV	chr3:49933572	69.24	2.89	18.39	6.8	0.88	1.81
T267A	SNV	chr3:49933572	74.49	1.25	16.29	4.86	2.04	1.07
TA268T	DEL	chr3:49933572	65.53	2.33	20.14	8.26	2.15	1.59
A268T	SNV	chr3:49933571	70.26	1.95	18.22	6.61	1.27	1.69
A268G	SNV	chr3:49933571	63.74	3.48	22.27	7.56	1.22	1.74
A268C	SNV	chr3:49933571	71.42	8.38	13.61	3.65	0.89	2.05
C269T	SNV	chr3:49933570	67.22	3.05	21.21	4.88	1.65	1.99
C269G	SNV	chr3:49933570	70.24	3.19	19.58	2.93	1.32	2.73
C269A	SNV	chr3:49933570	78.29	0.84	13.07	3.45	3.42	0.93
T270G	SNV	chr3:49933569	66.34	2.76	22.79	4.76	1.83	1.52
T270C	SNV	chr3:49933569	62.68	5.35	23.56	4.6	1.51	2.3
T270A	SNV	chr3:49933569	67.97	6.19	18.5	3.58	2.42	1.33
TG271T	DEL	chr3:49933568	54.82	6.67	27.58	7.62	1.34	1.96
G271T	SNV	chr3:49933568	71.78	2.3	16.7	5.53	2.03	1.67
G271C	SNV	chr3:49933568	62.54	1.93	23.23	4.82	3.43	4.04
G271A	SNV	chr3:49933568	75.05	2.12	14.54	3.61	3.88	0.81
G272T	SNV	chr3:49933567	76.48	0.93	15.64	4.85	1.59	0.51
G272C	SNV	chr3:49933567	56.65	15.76	19.53	6.59	0.4	1.07
G272A	SNV	chr3:49933567	77.16	0.82	11.38	5.21	4.06	1.36
C273T	SNV	chr3:49933566	67.28	3.72	21.61	3.03	2.45	1.91
C273G	SNV	chr3:49933566	59.34	8.81	22.63	4.7	1.7	2.82
C273A	SNV	chr3:49933566	73.8	3.97	16.25	3.14	1.69	1.15
T274G	SNV	chr3:49933565	70.14	2.18	10.51	14.86	1.18	1.14
T274C	SNV	chr3:49933565	64.74	5.49	22.25	4.17	1.76	1.58
T274A	SNV	chr3:49933565	65.07	5.08	22.15	4.11	1.72	1.88
TG275T	DEL	chr3:49933564	47.72	8.9	31.03	7.02	1.03	4.3
G275T	SNV	chr3:49933564	64.86	4.02	20.64	5.91	2.13	2.43
G275C	SNV	chr3:49933564	69.94	4.24	13.08	8.86	2.26	1.61
G275A	SNV	chr3:49933564	67.97	4.58	17.82	5.93	0.99	2.71
G276T	SNV	chr3:49933563	68.64	2.79	18.87	5.45	2.39	1.86
G276C	SNV	chr3:49933563	56.19	5.32	28.57	5.72	1.69	2.5
G276A	SNV	chr3:49933563	77.5	1.85	12.38	4.49	2.39	1.39
T277G	SNV	chr3:49933562	53.91	10.36	19.83	12.25	0.87	2.78
T277C	SNV	chr3:49933562	56.8	9.84	21.84	7.17	1.07	3.29
T277A	SNV	chr3:49933562	54.47	8.59	29.13	3.62	1.56	2.63
C278T	SNV	chr3:49933561	65.73	4.25	20.59	5.54	2.12	1.78
C278G	SNV	chr3:49933561	55.99	10.17	22.36	10.21	0.49	0.78
C278A	SNV	chr3:49933561	69.57	5.51	19.35	3.83	1	0.75
C279T	SNV	chr3:49933560	52.33	12.2	26.32	5.29	2.03	1.83
C279A	SNV	chr3:49933560	60.39	9.84	19.89	6.87	1.25	1.77
CT280C	DEL	chr3:49933560	15.83	30.7	37.5	9.95	0.61	5.41
T280G	SNV	chr3:49933559	3.84	47.07	41.91	1.92	0.2	5.05
T280C	SNV	chr3:49933559	17.82	26.35	43.82	5.88	0.43	5.7
T280A	SNV	chr3:49933559	19.84	34.62	36.37	4.39	0.59	4.19
C281T	SNV	chr3:49933558	61.55	7.38	22.42	4.89	1.27	2.5
C281A	SNV	chr3:49933558	69.56	2.25	19.18	4.88	1.27	2.85
A282T	SNV	chr3:49933558	28.56	18.89	38.05	8.59	2.79	3.12
A282G	SNV	chr3:49933557	10.17	41.43	42.14	2.79	0.15	3.32
A282C	SNV	chr3:49933557	20.79	19.53	50.47	2.83	0.76	5.62
T283C	SNV	chr3:49933556	57.11	7.22	25.05	6.76	0.96	2.89
T283A	SNV	chr3:49933556	5.38	47.24	41.06	2.32	0.14	3.86
G284A	SNV	chr3:49933556	65.37	4.82	20.9	5.03	2.11	1.77
A285T	SNV	chr3:49933555	66.55	3.75	20.56	5.71	1.17	2.26
A285G	SNV	chr3:49933555	50.74	15.96	25.48	4.06	0.99	2.77
AC286A	DEL	chr3:49933554	27.4	9.97	53.79	6.03	1.37	1.45
C286T	SNV	chr3:49933554	51.44	13.94	26.87	3.85	1.22	2.68
C286G	SNV	chr3:49933553	37.48	15.85	35.89	5.24	1.62	3.93
C286A	SNV	chr3:49933553	63.11	4.55	20.67	6.17	3.42	2.08
C287T	SNV	chr3:49933553	77.38	0.58	11.31	7.25	2.13	1.35
C287G	SNV	chr3:49933552	60.94	7.89	22.35	4.21	1.54	3.07
C287A	SNV	chr3:49933552	63.79	4.72	22.35	5.22	1.57	2.35
C288T	SNV	chr3:49933552	76.19	1.99	13.56	5.65	1.27	1.34
C288A	SNV	chr3:49933551	53.17	10.43	28.8	4.52	1.09	2
T289C	SNV	chr3:49933551	20.85	42.3	32.54	1.69	0.25	2.37
T289A	SNV	chr3:49933551	13.59	37.2	43.01	2.19	0.38	3.63
C290T	SNV	chr3:49933550	67.44	5.08	22.35	2.78	1.55	0.79
C290A	SNV	chr3:49933550	38.37	29.4	27.64	1.98	0.68	1.93
T291C	SNV	chr3:49933549	17.19	37.4	38.5	3.22	0.38	3.31
T291A	SNV	chr3:49933549	4.68	64.17	27.88	0.5	0.16	2.62
C292T	SNV	chr3:49933548	75.51	1.08	15.36	4.13	2.52	1.39
C292G	SNV	chr3:49933548	11.13	58.49	27.13	1.54	0.39	1.32
C292A	SNV	chr3:49933547	10.44	47.83	37.14	1.72	0.28	2.6
T293C	SNV	chr3:49933547	68.88	3.9	18.67	5.82	1.2	1.53
G294T	SNV	chr3:49933546	44.62	17.51	30.03	4.45	1	2.38
G294C	SNV	chr3:49933546	46.69	13.21	31.97	4.54	1.49	2.09
G294A	SNV	chr3:49933546	68.48	4.65	18.58	5.01	1.66	1.62
C295T	SNV	chr3:49933545	43.72	24.84	24.07	3.53	0.96	2.88
C295G	SNV	chr3:49933545	0.21	83.15	15.33	0.04	0.12	1.15
C295A	SNV	chr3:49933545	1.28	72.3	25.26	0.21	0.06	0.89
CA296C	DEL	chr3:49933544	0.63	85.15	13.91	0.1	0.01	0.2
A296T	SNV	chr3:49933544	0.25	79.7	19.02	0.05	0.05	0.94
A296G	SNV	chr3:49933544	0.31	80.39	17.48	0.08	0.05	1.69
A296C	SNV	chr3:49933543	0.21	81.12	18.04	0.05	0.09	0.49
G297T	SNV	chr3:49933543	0.34	83.64	14.73	0.12	0.04	1.12
G297C	SNV	chr3:49933543	0.21	85.41	13.53	0.08	0.04	0.72
G297A	SNV	chr3:49933543	0.31	79.53	19.06	0.12	0.05	0.93
G298T	SNV	chr3:49933542	3.66	68.6	24.77	1.1	0.49	1.38
G298C	SNV	chr3:49933542	4.26	52.95	34.73	1.8	0.04	6.22
G298A	SNV	chr3:49933542	18.29	43.12	32.82	2.3	0.5	2.97
A299T	SNV	chr3:49933541	70.39	3.1	18.84	3.01	2.35	2.31
A299G	SNV	chr3:49933541	10.24	56.87	26.9	1.88	0.39	3.73
T300C	SNV	chr3:49933541	80.98	3.08	10.75	2.23	1.07	1.89
T300A	SNV	chr3:49933540	64.42	5.15	23.27	4.69	1.13	1.35
A301T	SNV	chr3:49933540	69.84	5.33	16.79	2.43	3.04	2.57
A301G	SNV	chr3:49933540	59.43	7.04	24.72	4.85	1.94	2.02
T302C	SNV	chr3:49933539	69.28	3.67	18.39	5.34	1.75	1.57
T302A	SNV	chr3:49933539	62.11	6.77	22.54	4.45	1.39	2.74
T303C	SNV	chr3:49933538	79.16	1.36	11.25	4.38	2.5	1.35
T303A	SNV	chr3:49933538	68.59	2.03	16.25	6.37	2.24	4.52
TG304T	DEL	chr3:49933537	67.79	2.64	18.76	6.1	3.72	1
G304A	SNV	chr3:49933537	71.57	1.58	18.19	4.81	2.67	1.17
G305T	SNV	chr3:49933536	77.88	0.91	12.91	4.39	3	0.92
G305C	SNV	chr3:49933536	75.23	0.53	12.95	5.91	3.34	2.03
G305A	SNV	chr3:49933535	76.46	0.85	14.4	4.53	2.83	0.93
G306T	SNV	chr3:49933535	79	0.98	12.58	4.63	1.79	1.01
G306C	SNV	chr3:49933535	76.76	3.38	13.82	4.33	0.37	1.34
G306A	SNV	chr3:49933534	80.18	0.38	9.51	4.89	3.95	1.08
C307T	SNV	chr3:49933534	27.43	33.39	32.35	3.18	0.91	2.74
C307G	SNV	chr3:49933533	3.49	66.97	26.07	0.9	0.14	2.43
C307A	SNV	chr3:49933533	54.61	11.34	26.21	4.39	1.32	2.13
T308G	SNV	chr3:49933533	49.4	15.12	27.42	4.57	0.89	2.6
T308C	SNV	chr3:49933532	76.71	1.5	13.16	4.88	2.49	1.25
T308A	SNV	chr3:49933532	64.13	5.42	22.54	4.36	1.54	2.01
TG309T	DEL	chr3:49933532	69.6	1.52	18.43	5.87	3.32	1.25
G309T	SNV	chr3:49933531	63.6	0.46	24.82	4.58	6.27	0.27
G309C	SNV	chr3:49933531	74.39	0.38	3.66	21.2	0.23	0.13
G309A	SNV	chr3:49933531	66.49	2.65	22.21	4.18	3.13	1.34
G310T	SNV	chr3:49933530	76.88	0.7	13.55	5.19	2.41	1.27
G310A	SNV	chr3:49933530	79.21	0.74	11.54	4.73	2.53	1.26
G311T	SNV	chr3:49933530	72.81	8.3	6.5	9.94	0.65	1.8
G311A	SNV	chr3:49933530	82.53	0.46	8.82	4.34	2.77	1.08
C312T	SNV	chr3:49933529	43.56	20.87	26.93	4.54	0.8	3.3
C312A	SNV	chr3:49933529	61.13	6.43	21.24	7.27	1.42	2.52
G313T	SNV	chr3:49933529	36.27	28.79	26.17	4.9	1.26	2.62
G313C	SNV	chr3:49933528	57.8	9.53	21.13	7.19	1.92	2.43
G313A	SNV	chr3:49933528	40.21	21.69	29.89	4.53	0.87	2.8
C314T	SNV	chr3:49933527	46.63	11.62	31.84	5.24	0.98	3.69
C314A	SNV	chr3:49933527	49.16	12.14	28.55	6.66	1.24	2.25
T315G	SNV	chr3:49933526	46.57	12.54	32.72	3.76	0.48	3.93
T315C	SNV	chr3:49933526	70.33	3.37	18.41	5.13	1.33	1.44
T315A	SNV	chr3:49933525	53.96	11.37	26.45	4.05	1.02	3.16
G316T	SNV	chr3:49933525	51.99	13.63	25.4	4.7	2.67	1.6
G316C	SNV	chr3:49933525	55.85	12.54	24.39	2.91	2.48	1.84
G316A	SNV	chr3:49933524	55.82	10.81	25.71	3.96	1.15	2.56
T317G	SNV	chr3:49933524	6.87	50.15	36.75	1.51	0.05	4.68
T317C	SNV	chr3:49933523	72.85	1.81	15.1	5.94	2.55	1.76
T317A	SNV	chr3:49933523	56.11	7.92	26.65	5.14	1.95	2.23
G318T	SNV	chr3:49933523	68.92	2.95	18.74	5.36	2.51	1.53
G318C	SNV	chr3:49933522	72.07	2.39	17.04	4.86	2.22	1.42
G318A	SNV	chr3:49933522	55.57	9.83	25.78	4.94	1.59	2.29
G319T	SNV	chr3:49933522	51.37	14.29	26.76	4.75	0.7	2.14
G319C	SNV	chr3:49933521	59.09	6.21	19.92	11.24	1.3	2.23
G319A	SNV	chr3:49933521	69.46	4.73	16.15	5.87	1.9	1.9
C320T	SNV	chr3:49933521	38.21	26.95	27.1	3.66	0.85	3.24
C320G	SNV	chr3:49933520	7.13	62	26.25	2.23	0.27	2.11
C320A	SNV	chr3:49933520	48.72	11.6	33.4	4.45	0.63	1.2
T321G	SNV	chr3:49933520	61.48	7.16	22.55	4.59	1.43	2.79
T321C	SNV	chr3:49933519	70.13	3.53	17.73	4.54	2.31	1.77
T321A	SNV	chr3:49933519	48.78	14.14	27.99	5.08	1.38	2.62
G322T	SNV	chr3:49933519	33.91	36.64	23.55	4.16	0.59	1.15
G322C	SNV	chr3:49933518	49.17	14.15	26.67	6.29	1.39	2.33
G322A	SNV	chr3:49933518	37.99	28.18	26.53	4.07	0.79	2.44
A323T	SNV	chr3:49933518	57.95	8.15	24.35	5.22	1.44	2.9
A323G	SNV	chr3:49933517	46.87	20.36	26.04	4.06	0.65	2.02
A323C	SNV	chr3:49933517	68.4	6.06	18	3.88	1.7	1.97
C324T	SNV	chr3:49933517	50.54	15.17	25.86	3.54	1.28	3.61
C324A	SNV	chr3:49933516	58.64	14.11	20.1	3.18	0.99	2.97
T325G	SNV	chr3:49933516	67.14	4.85	17.38	7.48	1.83	1.33
T325C	SNV	chr3:49933516	76.59	2.74	13.24	3.94	1.76	1.73
T325A	SNV	chr3:49933515	51.68	12.74	27.12	4.73	1.43	2.3
TG326T	DEL	chr3:49933515	59.49	7.23	18.46	2.61	0.59	11.62
G326T	SNV	chr3:49933515	55.3	8.71	24.92	6.93	1.32	2.83
G326C	SNV	chr3:49933514	60.97	5.38	25.63	4.17	1.57	2.29
G326A	SNV	chr3:49933514	55.25	11.08	24.62	4.79	1.12	3.13
T327G	SNV	chr3:49933513	56.29	18.68	16.63	6.09	0.99	1.32
T327C	SNV	chr3:49933513	77.96	0.9	13	4.45	2.64	1.04
T327A	SNV	chr3:49933513	64.77	5.12	21.79	4.45	1.83	2.04
G328T	SNV	chr3:49933513	65.65	5.67	18.65	6.36	1.16	2.51
G328C	SNV	chr3:49933512	73.82	2.01	15.25	5.62	2	1.3
G328A	SNV	chr3:49933512	65.36	6.65	20.63	4.44	1.12	1.81
T329G	SNV	chr3:49933512	47.03	15.93	27.65	5.23	1.16	3
T329C	SNV	chr3:49933511	76.32	1.48	13.28	4.74	2.75	1.43
T329A	SNV	chr3:49933511	70.9	2.81	18.17	4.77	1.83	1.53
TG330T	DEL	chr3:49933511	80.29	1.05	10.17	4.71	2.71	1.07
G330T	SNV	chr3:49933510	77.15	0.71	15.01	2.64	3.74	0.75
G330C	SNV	chr3:49933510	86.86	1.06	6.1	2.69	2.8	0.5
G330A	SNV	chr3:49933510	57.28	4.35	30.22	4.37	1.59	2.19
G331T	SNV	chr3:49933509	76.69	1.47	14	5.32	1.51	1.01
G331C	SNV	chr3:49933509	78.49	0.7	12.05	4.55	2.99	1.23
G331A	SNV	chr3:49933509	72.51	0.62	17.62	3.01	4.64	1.6
G332C	SNV	chr3:49933509	73.56	0.75	13.89	6.2	2.19	3.42
G332A	SNV	chr3:49933508	81.61	0.43	9.03	4.95	2.85	1.12
T333C	SNV	chr3:49933508	75.44	1.9	14.36	4.31	2.23	1.77
T333A	SNV	chr3:49933508	74.7	1.94	14.33	5.25	2.44	1.36
A334T	SNV	chr3:49933507	62.59	7.59	21.88	4.68	1.16	2.1
A334G	SNV	chr3:49933507	66.01	5.81	19.38	5.45	1.44	1.92
T335C	SNV	chr3:49933507	67.16	4.43	20.06	5.19	1.62	1.55
T335A	SNV	chr3:49933506	56.18	7.96	25.91	5.08	1.33	3.53
C336T	SNV	chr3:49933506	21.53	41.17	30.51	2.75	0.35	3.7
C336A	SNV	chr3:49933505	63.65	9.74	19.32	4.77	1.2	1.33
A337T	SNV	chr3:49933505	62.35	7.31	23.42	3.76	1.05	2.11
A337G	SNV	chr3:49933504	70.83	2.74	17.48	5	2.26	1.7
A337C	SNV	chr3:49933504	51.96	6.51	31.55	5.52	2.21	2.25
A338T	SNV	chr3:49933503	59.46	6.46	24.53	5.18	1.62	2.76
A338G	SNV	chr3:49933503	58.3	11.12	22.7	4.71	0.89	2.28
A338C	SNV	chr3:49933502	68.13	4.72	19.01	5.97	0.97	1.2
C339T	SNV	chr3:49933502	19.7	41.87	31.87	2.73	0.64	3.19
C339A	SNV	chr3:49933501	18.75	39.73	35.52	2.02	0.84	3.15
G340T	SNV	chr3:49933501	73.95	7.93	14.17	1.36	0.2	2.39
G340C	SNV	chr3:49933501	48.56	13.85	33.98	1.74	0.2	1.67
G340A	SNV	chr3:49933500	49.88	15.34	25.96	5.25	1.13	2.45
T341G	SNV	chr3:49933500	15.19	43	32.83	3.5	0.74	4.74
T341C	SNV	chr3:49933500	72.57	3.12	16.93	4.32	1.72	1.33
T341A	SNV	chr3:49933499	67.87	6.35	17.99	4.84	1.22	1.73
G342T	SNV	chr3:49933499	59.8	8.92	24.74	3.5	0.94	2.12
G342A	SNV	chr3:49933498	51.88	15.55	24.27	4.1	1.36	2.85
A343T	SNV	chr3:49933498	52.39	15.33	24.4	3.82	1.19	2.87
A343G	SNV	chr3:49933498	59.48	9.32	21.69	5.16	1.34	3.01
A343C	SNV	chr3:49933497	55.87	14.84	20.84	5.01	0.77	2.67
AC344A	DEL	chr3:49933497	62.73	3.55	23.66	6.32	1.87	1.87
C344T	SNV	chr3:49933497	58.46	8.09	24.07	4.84	1.58	2.95
C344G	SNV	chr3:49933496	44.19	17.67	27.43	4.3	1.6	4.81
C345T	SNV	chr3:49933496	43.05	16.78	30.78	5.25	1.22	2.91
C345G	SNV	chr3:49933495	45.37	26.61	23.02	1.67	0.56	2.76
C345A	SNV	chr3:49933495	42.99	20.56	28.66	3.06	1.03	3.71
G346T	SNV	chr3:49933495	68.93	4.48	18.37	5.52	1.66	1.04
G346C	SNV	chr3:49933495	62.56	11.55	18.08	2.99	0.84	3.98
G346A	SNV	chr3:49933494	67.32	3.93	19.85	4.92	2.33	1.65
T347G	SNV	chr3:49933494	45.54	21.58	23.2	5.99	0.51	3.18
T347C	SNV	chr3:49933494	72.24	2.58	15.58	5.56	2.53	1.52
T347A	SNV	chr3:49933493	71.62	3.3	17.18	4.5	1.58	1.82
TG348T	DEL	chr3:49933493	62.5	2.06	26.41	3.89	3.24	1.9
G348T	SNV	chr3:49933493	65.76	2.15	23.25	5.07	1.94	1.84
G348C	SNV	chr3:49933492	82.81	0.07	5.5	8.21	3.32	0.1
G349T	SNV	chr3:49933492	63.18	3.31	24.04	5.89	1.87	1.72
G349C	SNV	chr3:49933492	42.46	11.05	37.03	5.55	1.26	2.65
G349A	SNV	chr3:49933491	75.44	0.75	13.76	4.95	3.04	2.07
G350T	SNV	chr3:49933491	92.15	2.51	3.92	0.84	0.42	0.16
G350C	SNV	chr3:49933491	47.76	6.12	36.7	5.28	1.91	2.23
G350A	SNV	chr3:49933491	82.45	0.19	8.73	4.5	3.05	1.08
GT351G	DEL	chr3:49933490	60.11	1.79	28.71	5.28	2.9	1.2
T351C	SNV	chr3:49933490	67.64	2.59	20.18	5.88	1.53	2.18
T351A	SNV	chr3:49933489	77.34	1.21	13.07	4.46	2.58	1.35
TG352T	DEL	chr3:49933489	62.66	3.89	23.05	2.91	4.88	2.6
G352T	SNV	chr3:49933489	71.11	2.59	17.77	5.62	1.68	1.24
G352C	SNV	chr3:49933488	83.04	1.1	9.12	3.57	2.09	1.07
G352A	SNV	chr3:49933488	58.04	7.94	26.55	4.59	1.32	1.55
G353T	SNV	chr3:49933488	79.58	0.88	11.87	1.69	4.01	1.96
G353C	SNV	chr3:49933488	73.4	1.17	17.72	4.86	1.67	1.18
G353A	SNV	chr3:49933487	79.95	0.69	10.45	5.31	2.31	1.3
GT354G	DEL	chr3:49933487	18.5	43.61	25.37	2.95	0.61	8.96
T354G	SNV	chr3:49933487	69.57	5.52	17.67	2.71	2.34	2.2
T354C	SNV	chr3:49933486	54.27	7.83	28.87	5.24	1.65	2.13
T354A	SNV	chr3:49933486	72.2	2.21	17.26	3.93	1.83	2.57
G355T	SNV	chr3:49933486	18.4	57.03	22.35	0.79	0.27	1.16
G355C	SNV	chr3:49933485	50.13	13.09	27.23	5.28	1.56	2.71
G355A	SNV	chr3:49933485	50.3	12.02	31.52	3.12	1.49	1.56
GA356G	DEL	chr3:49933485	53.98	7.27	31.5	4.16	1.7	1.39
A356T	SNV	chr3:49933485	57.42	10.08	23.17	5.64	1.33	2.36
A356G	SNV	chr3:49933484	8.12	64.88	22.25	1.4	0.24	3.12
G357T	SNV	chr3:49933484	38.78	24.29	29.8	4.06	0.91	2.16
G357A	SNV	chr3:49933484	57.04	8.72	24.87	5.65	1.67	2.05
A358T	SNV	chr3:49933483	51.09	14.11	28.49	2.13	1.08	3.11
A358G	SNV	chr3:49933483	5.4	66.39	24.52	0.74	0.11	2.84
A358C	SNV	chr3:49933483	53.16	9.77	26.84	5.49	2.68	2.06
G359T	SNV	chr3:49933483	64.8	6.04	18.63	6.74	1.7	2.09
G359C	SNV	chr3:49933482	58.51	6.64	25.7	6.14	2.69	0.32
G359A	SNV	chr3:49933482	52.55	8.76	27.79	6.14	1.75	3.03
C360T	SNV	chr3:49933481	44.19	19.48	27.76	4.21	1.13	3.24
C360A	SNV	chr3:49933481	65.51	10.16	18.03	3.98	0.68	1.64
T361G	SNV	chr3:49933480	66.59	4.42	19.65	5.13	1.09	3.12
T361C	SNV	chr3:49933480	57.41	8.05	23.97	6.78	0.96	2.83
T361A	SNV	chr3:49933480	56.26	13.72	22.44	4.13	1.08	2.36
G362C	SNV	chr3:49933479	31.55	37.56	24.66	3.3	0.77	2.17
G362A	SNV	chr3:49933479	58.28	8.3	25.29	4.7	1.4	2.02
GC363G	DEL	chr3:49933479	52.31	9.42	28.66	5.61	1.65	2.35
C363T	SNV	chr3:49933478	49.36	14.11	28.34	3.57	1.25	3.38
C363G	SNV	chr3:49933478	46.93	10.71	34.53	3.73	1.85	2.25
C363A	SNV	chr3:49933477	59.18	6.73	27.02	3.32	0.66	3.1
C364T	SNV	chr3:49933477	42.25	23.94	26.76	3.03	0.67	3.34
C364G	SNV	chr3:49933477	60.64	8.98	20.87	8.07	0.5	0.94
C364A	SNV	chr3:49933476	61.65	5.44	24.42	4.21	1.77	2.5
A365T	SNV	chr3:49933476	51.26	14.95	24.59	4.9	1.36	2.95
A365G	SNV	chr3:49933476	64.77	5.46	21.35	5.18	1.49	1.74
A365C	SNV	chr3:49933476	24.31	34.72	38.36	1.06	0.79	0.76
G366T	SNV	chr3:49933475	60.07	8.02	23.41	4.32	1.8	2.38
G366C	SNV	chr3:49933475	36.84	16.7	40.43	2.72	0.78	2.52
G366A	SNV	chr3:49933475	56.72	10.4	23.25	4.96	1.59	3.08
C367T	SNV	chr3:49933474	57.87	12.15	22.04	4.55	1.01	2.37
C367G	SNV	chr3:49933474	64.06	10.67	15.45	5.92	1.9	1.99
C367A	SNV	chr3:49933474	67.01	4.41	19.24	6.58	1.52	1.24
C367CA	IN	chr3:49933473	68.29	3.43	16.28	8.57	1.22	2.22
A368T	SNV	chr3:49933473	52.09	13.46	26.74	3.65	1.42	2.65
A368G	SNV	chr3:49933473	62.03	6.14	22.51	5.63	1.96	1.73
A368C	SNV	chr3:49933472	51.56	15.09	24.64	5.39	1.02	2.3
C369T	SNV	chr3:49933472	49.5	14.48	28.25	4	0.98	2.79
C369G	SNV	chr3:49933472	63.81	5.72	21.55	4.99	1.46	2.48
C369A	SNV	chr3:49933471	68.2	2.98	20.5	4.82	2.17	1.33
G370T	SNV	chr3:49933471	29.91	32.12	31.91	2.3	1.01	2.75
G370A	SNV	chr3:49933471	55.36	9.79	27.02	3.83	1.29	2.7
A371T	SNV	chr3:49933471	54.39	10.68	26.88	4.9	1.31	1.84
A371G	SNV	chr3:49933470	23.03	31.31	38.21	3.79	0.47	3.18
G372A	SNV	chr3:49933470	47.21	16.49	25.37	6.8	2.73	1.41
GT373G	DEL	chr3:49933470	55.88	13.04	22.75	5.25	0.91	2.17
T373C	SNV	chr3:49933469	57.31	7.53	27.14	4.56	1.67	1.79
T373A	SNV	chr3:49933469	69.25	3.01	19.84	3.51	2.35	2.04
T374G	SNV	chr3:49933469	53.85	5.54	32.74	2.15	1.86	3.87
T374C	SNV	chr3:49933468	47.69	15.28	29.67	3.69	1.24	2.42
T374A	SNV	chr3:49933468	58.25	7.08	25.78	5.61	1.84	1.45
TC375T	DEL	chr3:49933467	51.9	10.43	21.88	6.24	3.57	5.98
C375T	SNV	chr3:49933467	53.05	10.05	28.58	4.13	1.55	2.65
C375G	SNV	chr3:49933466	57.94	11.83	24.39	3.75	1.38	0.72
C375A	SNV	chr3:49933466	45.25	17.82	25.83	6.58	0.6	3.91
C376T	SNV	chr3:49933465	49.51	15.48	28.1	4.49	0.37	2.06
C376G	SNV	chr3:49933465	46.07	27.07	20.3	3.82	0.31	2.42
C376A	SNV	chr3:49933464	54.8	7.72	26.4	3.89	2.7	4.49
C376CG	IN	chr3:49933464	47.22	20.42	25.66	3.53	1.12	2.05
CG377C	DEL	chr3:49933464	64.49	3.42	21.05	6.32	2.7	2.02
G377T	SNV	chr3:49933464	72.26	3.36	15.82	5.89	1.3	1.38
G377C	SNV	chr3:49933463	61.21	5	24.4	5.47	1.9	2.02
G377A	SNV	chr3:49933463	64.6	3.41	23.26	4.6	2	2.13
G378T	SNV	chr3:49933463	69.56	3.03	16.64	4.28	1.37	5.12
G378A	SNV	chr3:49933462	70.91	2.12	18.39	3.8	2.38	2.39
G379T	SNV	chr3:49933462	70.61	1.46	16.39	4.8	2.42	4.32
G379A	SNV	chr3:49933462	79.23	0.9	10.75	4.01	2.62	2.51
G380T	SNV	chr3:49933462	64.7	4.29	20.14	5.15	2.25	3.48
G380C	SNV	chr3:49933462	83.04	0.69	6.33	8.38	0.84	0.71
G380A	SNV	chr3:49933461	74.09	1.93	15.24	3.52	2.36	2.87
G380GA	IN	chr3:49933461	66.97	4.37	19.41	4.24	2.14	2.86
G381C	SNV	chr3:49933461	67.28	1.66	21.47	4.89	2.15	2.54
G381A	SNV	chr3:49933460	69.22	1.29	18.82	5.83	2.33	2.5
G382T	SNV	chr3:49933460	46.82	12.17	28.03	5.59	0.3	7.08
G382A	SNV	chr3:49933459	59.72	5.19	24.66	4.54	0.54	5.35
A383T	SNV	chr3:49933459	42.99	19.42	26.61	4.25	1.47	5.26
A383G	SNV	chr3:49933458	62.29	6.78	22.71	5.46	1.64	1.12
A383C	SNV	chr3:49933458	65.44	4.56	22.59	4.75	1.61	1.06
C384T	SNV	chr3:49933458	39.78	28.42	25.94	3.89	0.89	1.09
C384A	SNV	chr3:49933458	47.03	23.11	22.45	3.12	1.12	3.17
A385T	SNV	chr3:49933457	54.85	8.39	28.44	4.73	1.67	1.92
A385G	SNV	chr3:49933457	66.43	6.21	19.76	4.37	1.75	1.48
A385C	SNV	chr3:49933456	64.88	6.3	20.68	5.61	1.03	1.5
T386G	SNV	chr3:49933456	60.03	8.75	19.91	7.98	1.83	1.49
T386C	SNV	chr3:49933455	68.05	4.03	19.63	5.35	1.4	1.55
T386A	SNV	chr3:49933455	63.35	6.46	21.45	5.09	2.04	1.61
TG387T	DEL	chr3:49933455	61.21	6.14	23.22	5.24	1.72	2.47
G387T	SNV	chr3:49933454	55.11	9.7	25.09	5.29	1.56	3.25
G387A	SNV	chr3:49933454	45.98	19.34	26.74	4.55	1.08	2.31
G388T	SNV	chr3:49933454	58.93	2.68	25.78	7.37	2.11	3.12
G388C	SNV	chr3:49933453	58.74	11.07	22.58	4.08	1.63	1.89
G388A	SNV	chr3:49933453	62.23	3.1	21.83	3.88	2.02	6.94
GT389G	DEL	chr3:49933453	65.7	3.98	23.04	5.25	0.95	1.08
T389G	SNV	chr3:49933452	58.88	10.44	20.82	5.94	1.18	2.74
T389C	SNV	chr3:49933452	70.12	2.64	18.76	5.18	1.88	1.43
T389A	SNV	chr3:49933452	76.86	0.93	13.23	5.57	2.28	1.14
T390G	SNV	chr3:49933452	60.2	6.03	24.35	4.95	1.87	2.59
T390C	SNV	chr3:49933451	70.34	1.99	16.87	6.69	2.52	1.59
T390A	SNV	chr3:49933451	41.47	20.42	30.88	4.2	1.55	1.49
G391T	SNV	chr3:49933450	51.55	12.67	27.12	3.06	1.02	4.59
G391C	SNV	chr3:49933450	57.59	9.95	22.41	3.53	2.98	3.55
G391A	SNV	chr3:49933450	51.1	14.66	24.63	4.66	1.98	2.96
T392C	SNV	chr3:49933450	65.43	6.09	20.58	4.37	2.02	1.51
T392A	SNV	chr3:49933449	61.26	5.27	22.73	4.32	1.26	5.17
C393T	SNV	chr3:49933449	46.67	19.31	24.72	4.72	1.05	3.53
C393G	SNV	chr3:49933449	55.56	7.88	26.76	5.75	1.33	2.71
C393A	SNV	chr3:49933448	61.61	13.16	17.51	4.29	1.12	2.31
T394G	SNV	chr3:49933448	69.72	5.9	18.15	4.62	0.74	0.87
T394C	SNV	chr3:49933448	70.8	1.72	19.19	5.36	1.89	1.04
T394A	SNV	chr3:49933447	58.18	9.02	22.92	6.3	1.18	2.4
G395T	SNV	chr3:49933447	58.25	4.77	27.95	4.09	1.3	3.64
G395C	SNV	chr3:49933447	64.01	7.77	20.14	4.81	1.15	2.12
G395A	SNV	chr3:49933446	62.28	5.15	22.24	5.92	1.72	2.7
G395GC	IN	chr3:49933446	63.48	4.14	20.97	8.05	1.62	1.73
GC396G	DEL	chr3:49933445	59.96	4.69	23.33	5.7	2.15	4.17
C396T	SNV	chr3:49933445	63.76	4.61	20.15	4.95	1.87	4.67
C396G	SNV	chr3:49933445	60.39	10.04	19.97	5.02	1.77	2.81
C397T	SNV	chr3:49933444	65.84	3.46	20.43	5.18	2.01	3.08
C397G	SNV	chr3:49933444	81.44	1.28	10.46	4.41	0.83	1.57
C397A	SNV	chr3:49933444	75.62	2.39	12.54	5.39	1.77	2.29
C398T	SNV	chr3:49933443	69	2.3	19.62	4.4	1.95	2.73
C398A	SNV	chr3:49933443	67.6	3.11	20.41	5.28	1.42	2.17
C399T	SNV	chr3:49933443	65.8	6.27	18.31	4.35	1.42	3.86
C399A	SNV	chr3:49933443	65.24	4.26	22.31	4.77	1.57	1.86
C400T	SNV	chr3:49933443	64.15	5.84	21.89	3.75	1.2	3.17
C400G	SNV	chr3:49933442	65.94	4.98	19.37	6.66	1.2	1.86
C400A	SNV	chr3:49933442	65.74	4.51	19.87	6.53	1.55	1.79
T401G	SNV	chr3:49933441	72.32	2.58	14.21	3.36	3.15	4.37
T401C	SNV	chr3:49933441	65.19	4.33	21.87	5.14	1.77	1.7
T401A	SNV	chr3:49933441	64.97	3.58	22.67	5.41	1.59	1.78
G402T	SNV	chr3:49933440	54.52	8.85	27.16	3.16	1.33	4.99
G402C	SNV	chr3:49933440	60.09	7.95	21.97	3.71	1.84	4.44
G402A	SNV	chr3:49933439	61.69	6.06	23.12	5.25	1.57	2.31
GC403G	DEL	chr3:49933439	61.33	5.71	23.59	5.7	1.27	2.41
C403T	SNV	chr3:49933438	60.93	5.19	24.04	4.62	2.09	3.13
C403G	SNV	chr3:49933438	68.42	4.12	17.62	7.18	1.34	1.32
C403A	SNV	chr3:49933438	63.11	5.58	21.71	5.34	1.22	3.04
C404T	SNV	chr3:49933437	61.63	5.96	23.72	4.94	1.8	1.95
C404A	SNV	chr3:49933437	71.56	1.9	18.29	5.29	1.67	1.27
C405T	SNV	chr3:49933437	72.83	2.67	17.18	4.28	1.18	1.86
C405A	SNV	chr3:49933436	68.98	3.02	20.16	4.46	1.96	1.42
C406T	SNV	chr3:49933436	65.75	4.07	20.64	5.29	1.54	2.7
C406G	SNV	chr3:49933436	76.2	2.18	9.74	9.13	1.15	1.6
C406A	SNV	chr3:49933436	64.05	4.2	22.34	5.86	1.5	2.06
C407T	SNV	chr3:49933435	52.25	14.97	24.69	4.6	0.9	2.59
C407G	SNV	chr3:49933435	69.18	2.46	18.15	5.29	3.21	1.71
C407A	SNV	chr3:49933435	58.96	12.64	21.79	2.59	1.95	2.07
A408T	SNV	chr3:49933434	57.15	9.26	24.7	3.37	1.67	3.85
A408G	SNV	chr3:49933434	64.56	3.49	21.57	6.3	2.24	1.83
A408C	SNV	chr3:49933433	53.83	11.39	25.11	4.54	1.88	3.24
T409G	SNV	chr3:49933433	69.05	6.01	18.3	4.79	1.12	0.74
T409C	SNV	chr3:49933432	63.62	5.66	21.63	4.96	2.12	2.01
T409A	SNV	chr3:49933432	68.7	4.72	17.43	4.9	2.3	1.95
TC410T	DEL	chr3:49933432	58.07	10.64	23.6	4.18	1.93	1.58
C410T	SNV	chr3:49933431	63.91	6.69	22.01	3.85	1.68	1.87
C410A	SNV	chr3:49933431	67.02	5.59	20.16	3.97	1.4	1.86
C411T	SNV	chr3:49933431	69.95	2.62	19.36	5.15	1.05	1.86
C411A	SNV	chr3:49933430	68.76	1.97	20.57	5.09	2.98	0.62
C412T	SNV	chr3:49933430	50.34	14.15	27.35	4.1	0.92	3.13
C412A	SNV	chr3:49933430	65.7	9.25	20.7	1.7	1.34	1.31
CT413C	DEL	chr3:49933429	60.38	5.87	22.95	6.63	1.22	2.94
T413G	SNV	chr3:49933429	46.36	25.87	17.6	7.18	1.57	1.42
T413C	SNV	chr3:49933429	59.03	9.61	23.58	4.15	1.11	2.53
T413A	SNV	chr3:49933429	60.38	8.24	23.18	4.48	1.93	1.79
G414T	SNV	chr3:49933428	57.55	6.93	25.4	6.36	1.8	1.96
G414C	SNV	chr3:49933428	69.18	3.1	20.03	4.5	1.63	1.57
G414A	SNV	chr3:49933427	54.08	11.59	22.4	2.8	1.72	7.42
C415T	SNV	chr3:49933427	30.1	36.1	28.92	2.56	0.85	1.49
C415A	SNV	chr3:49933426	68.92	4.91	18.85	4.58	1.03	1.71
A416T	SNV	chr3:49933426	61.84	6.71	22.58	4.53	2.56	1.79
A416G	SNV	chr3:49933426	59.07	10.68	22.65	5.18	1.13	1.3
A416C	SNV	chr3:49933425	40.98	24.7	30.35	1.43	0.37	2.17
G417T	SNV	chr3:49933425	68.71	5.86	17.54	4.73	1.82	1.34
G417C	SNV	chr3:49933425	62.02	7.2	21.59	6.2	1.99	1
G417A	SNV	chr3:49933424	64.89	5.12	21.95	4.76	2.06	1.22
C418T	SNV	chr3:49933424	56.61	13.75	22.74	3.59	1.36	1.96
C418A	SNV	chr3:49933424	51.08	10.65	31.9	3.03	0.94	2.4
CT419C	DEL	chr3:49933423	50.63	7.12	27.28	6.9	8.01	0.07
T419G	SNV	chr3:49933423	65.76	4.91	18.86	7.68	1.42	1.37
T419C	SNV	chr3:49933423	69.53	2.99	18.59	4.99	1.67	2.23
T419A	SNV	chr3:49933422	65.65	4.03	21.55	5.47	1.66	1.63
T420G	SNV	chr3:49933422	46.7	26.04	23.96	1.9	0.39	1
T420C	SNV	chr3:49933422	68.58	4.31	18.96	4.66	1.53	1.97
T420A	SNV	chr3:49933421	32.3	43.72	19.68	2.22	0.68	1.4
TG421T	DEL	chr3:49933421	62.36	6.86	22.13	4.73	0.7	3.22
G421T	SNV	chr3:49933421	55.14	9.77	25.82	4.89	1.12	3.26
G421A	SNV	chr3:49933420	26.94	36.8	27.75	2.58	0.91	5.02
G422T	SNV	chr3:49933420	60.33	5.27	21.1	6.52	2.43	4.35
G422C	SNV	chr3:49933420	59.99	2.16	26.97	6.22	2.71	1.94
G422A	SNV	chr3:49933420	59.17	6.18	19.49	4.47	1.99	8.7
GC423G	DEL	chr3:49933419	38.15	27.68	24.55	3.65	1.58	4.4
C423T	SNV	chr3:49933419	49.27	14.61	27.94	3.76	1.25	3.17
C423G	SNV	chr3:49933419	40.95	23.88	31.05	2.07	0.99	1.06
C423A	SNV	chr3:49933418	63.54	4.23	21.88	4.96	2.09	3.3
C424T	SNV	chr3:49933418	42.61	26.26	24.08	3.08	0.73	3.24
C424G	SNV	chr3:49933418	62.23	6.44	21.5	4.55	1.77	3.51
C424A	SNV	chr3:49933418	45.22	16.42	27.85	3.69	0.81	6
A425T	SNV	chr3:49933417	63.53	5.35	20.31	4.98	1.51	4.33
A425G	SNV	chr3:49933417	42.97	21.48	28.91	3.31	0.99	2.35
A425C	SNV	chr3:49933416	68.13	2.74	19.39	5.01	1.84	2.89
G426C	SNV	chr3:49933416	47.49	10.99	26.87	6.21	1.17	7.26
G426A	SNV	chr3:49933416	57.48	8.85	22.42	6.41	1.69	3.15
G427T	SNV	chr3:49933415	35.47	31.34	26.8	2.5	0.8	3.09
G427C	SNV	chr3:49933415	50.28	13.34	24.29	7.97	0.76	3.35
G427A	SNV	chr3:49933415	44.65	17.71	30.93	4	0.81	1.9
GA428G	DEL	chr3:49933414	46.7	22.15	25.28	2.48	1.65	1.74
A428G	SNV	chr3:49933414	32.24	35.84	28.08	2.13	0.8	0.91
A428C	SNV	chr3:49933414	41.86	24.25	27.45	4	1.13	1.3
T429C	SNV	chr3:49933413	65.55	4.61	20.27	5.43	1.81	2.32
T429A	SNV	chr3:49933413	59.99	8.8	24.18	3.97	1.14	1.91
TG430T	DEL	chr3:49933413	55.7	4.58	22.5	9.55	2.52	5.15
G430T	SNV	chr3:49933412	53.9	3.44	29.51	6.18	1.14	5.84
G430A	SNV	chr3:49933411	38.09	24.14	32.37	3.04	0.96	1.39
G431T	SNV	chr3:49933411	62.05	5.94	19.6	8.77	1.15	2.51
G431C	SNV	chr3:49933411	64.34	4.86	20.47	4.77	2.68	2.89
G431A	SNV	chr3:49933411	71.28	2.95	16.21	5.97	1.88	1.7
T432G	SNV	chr3:49933410	54.79	16.17	22.26	3.42	2.9	0.46
T432C	SNV	chr3:49933410	68.87	3.87	18.28	4.94	2.17	1.87
T432A	SNV	chr3:49933409	71.34	1.82	17.33	5.73	2.38	1.41
G433T	SNV	chr3:49933409	63.25	3.79	19.12	2.98	2.9	7.96
G433C	SNV	chr3:49933409	59.79	7.2	23.82	4.55	1.81	2.83
G433A	SNV	chr3:49933408	54.46	8.17	27.23	5.99	1.92	2.21
GC434G	DEL	chr3:49933408	58.93	7.52	25.49	4.36	2.14	1.56
C434T	SNV	chr3:49933407	55.14	7.76	23.4	5.09	1.42	7.19
C434G	SNV	chr3:49933407	47.47	15.82	29.31	4.32	1.62	1.47
C434A	SNV	chr3:49933407	72.8	3.23	15.8	4.67	1.37	2.12
C435T	SNV	chr3:49933406	70.32	3.31	14.65	4.14	1.45	6.14
C435A	SNV	chr3:49933406	67.16	1.39	18.21	7.28	3.87	2.09
C436T	SNV	chr3:49933406	61.03	6.63	22.48	4.12	1.8	3.94
C436A	SNV	chr3:49933405	70.61	3.07	19.43	4.39	1.71	0.79
C437T	SNV	chr3:49933405	63.36	7.74	20.28	4.23	1.4	2.98
C437G	SNV	chr3:49933405	65.95	3.74	20.24	6.11	1.91	2.04
C437A	SNV	chr3:49933405	65.89	4.14	22.62	4.24	1.51	1.6
CA438C	DEL	chr3:49933404	17.01	19.24	50.04	3.51	6.56	3.64
A438T	SNV	chr3:49933404	58.1	10.19	22.02	3.96	1.17	4.56
A438G	SNV	chr3:49933404	57.75	9.57	25.12	4.21	1.73	1.63
A438C	SNV	chr3:49933403	53.86	13.65	25.2	5.01	0.72	1.56
A438AT	IN	chr3:49933403	56.78	12.79	18.89	4.15	1.19	6.2
AT439A	DEL	chr3:49933402	52.86	8.99	29.84	4.82	1.99	1.5
T439C	SNV	chr3:49933402	64.96	9.37	19.9	3.67	1	1.11
T439A	SNV	chr3:49933401	75	4.2	14.04	4.1	1.34	1.32
T440G	SNV	chr3:49933401	70.95	5.27	17.74	4.16	0.7	1.18
T440C	SNV	chr3:49933401	70.08	4.73	17.57	4.55	1.66	1.42
T440A	SNV	chr3:49933401	57.15	9.5	26.31	3.99	2.02	1.03
G441T	SNV	chr3:49933400	60.59	6.36	24.79	4.09	2.02	2.16
G441C	SNV	chr3:49933400	58.64	8.5	24.09	4.53	2.95	1.29
G441A	SNV	chr3:49933400	62.67	4.61	23.95	4.6	1.96	2.2
C442T	SNV	chr3:49933400	23.03	46.65	25.89	1.79	0.85	1.78
C442G	SNV	chr3:49933400	36.95	38.05	21.24	2.27	0.36	1.13
C442A	SNV	chr3:49933399	72.15	4.12	16.56	3.9	1.64	1.63
A443T	SNV	chr3:49933399	9.59	71.31	17.04	0.86	0.26	0.94
A443G	SNV	chr3:49933398	5.92	76.49	16.1	0.37	0.17	0.95
A443C	SNV	chr3:49933398	11.98	64.2	20.74	0.24	2.6	0.24
AG444A	DEL	chr3:49933398	0.25	85.69	13.31	0.16	0.07	0.52
G444T	SNV	chr3:49933397	0.6	80.51	17.65	0.06	0.1	1.08
G444C	SNV	chr3:49933397	0.5	94.62	4.29	0.07	0.13	0.38
G444A	SNV	chr3:49933397	3.23	77.75	17.39	0.21	0.47	0.96
G445C	SNV	chr3:49933396	0.4	86.61	11.61	0.03	0.1	1.25
G445A	SNV	chr3:49933396	0.46	81.89	16.47	0.05	0.11	1.02
T446C	SNV	chr3:49933396	0.35	82.05	16.31	0.05	0.09	1.15
T446A	SNV	chr3:49933395	1.13	72.22	21.48	0.12	0.17	4.89
TA447T	DEL	chr3:49933395	0.2	77.74	17.52	0.02	0.03	4.49
A447T	SNV	chr3:49933395	2.5	78.15	15.45	0.17	0.09	3.65
A447G	SNV	chr3:49933395	5.31	77.85	15.36	0.52	0.11	0.86
G448T	SNV	chr3:49933394	56.13	6.98	22.34	5.72	1.55	7.27
G448A	SNV	chr3:49933394	72.54	0.8	16.47	6.4	1.96	1.84
G449T	SNV	chr3:49933394	10.76	58.2	28.06	0.56	0.69	1.72
G449A	SNV	chr3:49933393	13.39	60.08	21.73	0.96	0.42	3.42
C450T	SNV	chr3:49933393	73.01	2.81	15.37	5.01	2.03	1.77
C450A	SNV	chr3:49933392	69.17	4.24	18.18	5.05	1.29	2.08
A451T	SNV	chr3:49933392	65.99	4.03	20.32	5.66	1.84	2.16
A451G	SNV	chr3:49933392	59.65	10.93	20.44	5.34	1.44	2.19
A451C	SNV	chr3:49933391	70.05	3.92	17.41	4.09	1.21	3.32
G452T	SNV	chr3:49933391	59.11	7.52	24.09	5.97	1.17	2.14
G452A	SNV	chr3:49933390	65.4	4.45	21.26	5.21	1.52	2.16
GC453G	DEL	chr3:49933390	56.24	10.07	25.86	3.04	1.5	3.29
C453T	SNV	chr3:49933389	59.35	8.51	24.83	3.44	2.25	1.61
C453G	SNV	chr3:49933389	58.65	6.13	28.58	4.31	1.19	1.13
C453A	SNV	chr3:49933388	50.8	9.39	30.13	4.46	1.61	3.6
C454T	SNV	chr3:49933388	57.56	11.86	23.69	3.73	0.98	2.18
C454G	SNV	chr3:49933387	47.57	16.3	23.07	4.35	1.23	7.48
C454A	SNV	chr3:49933387	61.08	6.77	24.26	3.52	1.01	3.36
C455T	SNV	chr3:49933387	56.7	11.02	25.19	4.76	0.86	1.47
C455CA	IN	chr3:49933386	61.29	5.17	25.12	3.76	2.93	1.73
CA456C	DEL	chr3:49933386	44.03	5.24	38.9	4.79	0.8	6.23
A456T	SNV	chr3:49933386	64.38	7.07	19.86	5.01	1.78	1.9
A456G	SNV	chr3:49933385	62.05	5.32	22.85	5.09	2.12	2.58
A456C	SNV	chr3:49933385	65.23	4.77	21.11	3.49	1.85	3.55
G457T	SNV	chr3:49933385	66.87	4.98	20.52	3.94	1.39	2.3
G457C	SNV	chr3:49933384	64.44	9.83	20.1	2.34	1.29	2
G457A	SNV	chr3:49933384	64.59	5.13	20.7	5.51	1.86	2.21
C458T	SNV	chr3:49933384	67.31	5.43	19.46	4.27	2.04	1.48
C458G	SNV	chr3:49933383	57.42	0.67	30.63	6.09	1.75	3.44
C458A	SNV	chr3:49933383	68.79	4.23	23.2	1.47	0.83	1.49
T459G	SNV	chr3:49933383	71.94	4.04	14.05	6.68	1.38	1.91
T459C	SNV	chr3:49933382	61.82	7.56	22.56	4.9	1.19	1.97
T459A	SNV	chr3:49933382	58.2	13.4	20.29	4.79	1.39	1.93
TG460T	DEL	chr3:49933382	37.05	31.65	27.06	2.25	0.58	1.42
G460T	SNV	chr3:49933381	51.33	15.96	27.41	2.51	1.39	1.41
G460C	SNV	chr3:49933381	24.37	23.2	44.09	2.58	0.97	4.8
G460A	SNV	chr3:49933381	28.12	42.11	25.77	2	0.56	1.44
G461T	SNV	chr3:49933380	52.69	16.55	25.23	3.72	0.86	0.95
G461C	SNV	chr3:49933380	13.08	31.78	53.72	0.56	0.72	0.15
G461A	SNV	chr3:49933380	49.69	19.37	23.78	3.88	1.54	1.74
A462T	SNV	chr3:49933379	66.5	6.99	18.26	5.31	1.45	1.5
A462G	SNV	chr3:49933379	58.19	10.55	23.33	4.25	2.32	1.37
A462C	SNV	chr3:49933379	61.64	20.97	12.65	2.16	0.8	1.77
AC463A	DEL	chr3:49933379	58.84	14.11	19.19	4.13	1.02	2.71
C463T	SNV	chr3:49933378	64.91	5.03	21.44	5.16	1.58	1.88
C463G	SNV	chr3:49933378	55.45	20.73	14.02	6.89	2.13	0.78
C464T	SNV	chr3:49933378	64.58	3.76	22.29	5.1	2.23	2.04
C464G	SNV	chr3:49933377	61.82	4.38	24.89	3.63	1.56	3.72
C464A	SNV	chr3:49933377	65.47	4.68	22.33	4.3	0.98	2.23
CT465C	DEL	chr3:49933377	56.28	12.6	24.62	3.34	2	1.16
T465G	SNV	chr3:49933376	63.9	6.34	18.72	5.5	1.51	4.02
T465C	SNV	chr3:49933376	59.08	10.77	22.81	4.2	1.68	1.47
T465A	SNV	chr3:49933376	57.77	8.01	26.67	3.55	1.84	2.16
TC466T	DEL	chr3:49933376	50.66	11.42	26.82	2.56	6.05	2.49
C466T	SNV	chr3:49933375	52.54	13.17	23.27	5.69	1.52	3.81
C466G	SNV	chr3:49933375	21.05	55.3	20.08	1.65	0.82	1.1
C466A	SNV	chr3:49933374	32.79	31.83	29.53	2.81	0.5	2.54
C467T	SNV	chr3:49933374	36.89	33.95	24.26	2.65	0.93	1.33
C467G	SNV	chr3:49933374	23.02	20.43	50.02	0.59	4.93	1
C467A	SNV	chr3:49933374	38.2	22.74	33.32	2.82	0.45	2.47
C468T	SNV	chr3:49933373	62.34	8.78	20.66	4.25	1.53	2.45
C468G	SNV	chr3:49933373	44.6	9.29	33.47	7.5	0.93	4.21
C468A	SNV	chr3:49933373	45.66	15.65	29.94	2.75	2.04	3.95
CT469C	DEL	chr3:49933373	53.99	7.89	28.69	3.88	2.03	3.52
T469G	SNV	chr3:49933372	52.93	15.21	19.82	8.43	2.26	1.36
T469C	SNV	chr3:49933372	63.9	7.93	20.51	4.83	1.41	1.41
T469A	SNV	chr3:49933372	56.07	11.51	25.39	3.68	1.31	2.04
T469TG	IN	chr3:49933371	64.5	7.06	20.24	5.84	0.99	1.36
TG470T	DEL	chr3:49933371	49.22	8.84	31.22	3.31	2.74	4.68
G470T	SNV	chr3:49933371	55.51	5.52	28.8	3.98	2.54	3.65
G470C	SNV	chr3:49933370	47.18	5.79	33.05	3.51	2.8	7.67
G470A	SNV	chr3:49933370	46.47	11.37	34	4.47	2.31	1.38
G471T	SNV	chr3:49933370	46.37	12.47	33.85	3.58	1.88	1.84
G471C	SNV	chr3:49933370	39.7	21.84	30.56	4.04	1.75	2.11
G471A	SNV	chr3:49933369	49.72	11.44	31.02	3.86	1.56	2.4
G472A	SNV	chr3:49933369	47.65	6.55	35.22	3.67	3.33	3.58
GA473G	DEL	chr3:49933369	54.23	11.13	25.25	4.02	2.53	2.85
A473T	SNV	chr3:49933369	58.65	5.2	27.51	5.3	1.85	1.49
A473G	SNV	chr3:49933369	59.18	8.91	22.37	5.36	1.79	2.38
A473C	SNV	chr3:49933368	55.62	11.09	27.61	2.2	2.27	1.2
A474T	SNV	chr3:49933368	63.81	6.29	21.66	4.57	1.77	1.9
A474G	SNV	chr3:49933368	60.8	6.64	23.08	4.84	2.03	2.61
A474C	SNV	chr3:49933367	51	12.97	27.02	6.16	1.02	1.84
A475T	SNV	chr3:49933367	62.46	6.11	24.86	2.98	1.72	1.87
A475G	SNV	chr3:49933367	63.09	5.29	22.64	4.87	1.72	2.39
C476T	SNV	chr3:49933366	63.93	4.53	21.28	3.13	4.89	2.24
C476G	SNV	chr3:49933366	62.59	6.74	21.24	4.66	2.39	2.38
C476A	SNV	chr3:49933365	75.99	4.81	13.61	3.04	1.44	1.12
C476CA	IN	chr3:49933365	65.19	4.44	15.24	6.16	1.37	7.6
A477T	SNV	chr3:49933365	60.55	7.5	24.41	3.78	1.69	2.06
A477G	SNV	chr3:49933364	65.45	6.05	20	4.87	1.66	1.98
AC478A	DEL	chr3:49933364	67.41	7.18	18.27	4.35	1.44	1.35
C478T	SNV	chr3:49933364	64.48	5.71	21.8	5.09	1.37	1.55
C478G	SNV	chr3:49933363	62.59	12	15.6	4.75	3.56	1.5
C478A	SNV	chr3:49933363	72.33	3.83	13.52	5.16	3.46	1.7
G479T	SNV	chr3:49933362	48.88	13.35	29.39	2.5	2.33	3.56
G479A	SNV	chr3:49933362	49.38	13.34	29.52	3.42	2.29	2.07
G480T	SNV	chr3:49933362	41.46	17.89	30.17	2.71	1.85	5.92
G480A	SNV	chr3:49933362	41.23	13.51	32.58	3.23	2.38	7.08
G481T	SNV	chr3:49933361	46.73	13.68	28.78	3.31	1.46	6.04
G481C	SNV	chr3:49933361	40.74	5.09	46.25	3.12	4.1	0.7
C482T	SNV	chr3:49933361	63.59	5.66	21.49	6.83	1.02	1.4
C482G	SNV	chr3:49933360	44.22	5.7	31.89	11.5	4.55	2.14
C482A	SNV	chr3:49933360	78.44	4.99	8.66	4.17	1.08	2.66
A483T	SNV	chr3:49933360	68.71	3.06	19.81	4.64	1.75	2.04
A483G	SNV	chr3:49933360	71.21	3.72	15.01	6.4	1.93	1.73
A483C	SNV	chr3:49933359	88.13	0.14	5.22	2.38	3.73	0.4
G484T	SNV	chr3:49933359	62.47	6.53	22.41	4.25	1.72	2.62
G484C	SNV	chr3:49933358	62.05	4.55	26.95	0.5	4.95	0.99
G484A	SNV	chr3:49933358	60.6	5.91	21.55	5.26	1.76	4.92
A485T	SNV	chr3:49933357	66.11	6.5	19.4	4.62	1.35	2.03
A485G	SNV	chr3:49933357	66.82	7.59	16.66	5.8	1.76	1.36
A485C	SNV	chr3:49933356	61.2	5.01	24.16	5.4	1.78	2.44
G486T	SNV	chr3:49933356	62.3	8.89	19.29	5.09	1	3.43
G486A	SNV	chr3:49933356	57.4	5.64	27.55	5	1.25	3.16
G487T	SNV	chr3:49933355	61.26	4.59	25.63	4.61	1.82	2.09
G487A	SNV	chr3:49933355	51.58	4.28	34.44	3.7	3.6	2.39
G488T	SNV	chr3:49933355	60.6	4.93	22.96	8.14	1.73	1.64
G488C	SNV	chr3:49933354	60.14	4.6	25.89	4.03	3.93	1.4
G488A	SNV	chr3:49933354	56.76	7.79	23.73	4.8	2.08	4.84
C489T	SNV	chr3:49933354	67.64	7.58	17.01	4.94	1.47	1.37
C490T	SNV	chr3:49933353	66.91	6.15	16.85	6.06	1.75	2.28
C490A	SNV	chr3:49933353	64.19	6.73	20.02	5.3	1.86	1.9
CT491C	DEL	chr3:49933353	68.63	10	11	6.27	1.57	2.52
T491G	SNV	chr3:49933352	66.41	2.58	20.73	4.44	2.39	3.44
T491C	SNV	chr3:49933352	60.42	6.05	22.75	4.51	2.07	4.19
T491A	SNV	chr3:49933351	65.29	5.44	20.53	5.4	1.64	1.7
A492T	SNV	chr3:49933351	63.1	7.19	21.21	4.64	1.82	2.03
A492G	SNV	chr3:49933350	60.43	4.88	22.27	5.81	2.26	4.35
A492C	SNV	chr3:49933350	66.39	6.72	20.39	3.51	1.3	1.69
C493T	SNV	chr3:49933350	65.02	6.5	19.99	5.95	1.55	1
C493G	SNV	chr3:49933349	64.55	8.07	20.7	3.28	1.73	1.67
C493A	SNV	chr3:49933348	60.31	6.9	24.08	5.39	1.77	1.54
A494T	SNV	chr3:49933348	61.67	5.35	26.14	4.11	1	1.74
A494G	SNV	chr3:49933348	64.61	5.54	20.18	5.79	1.78	2.09
A494C	SNV	chr3:49933347	63.82	7.04	19.89	4.47	1.65	3.13
G495T	SNV	chr3:49933347	61.71	6.24	23.1	4.59	1.74	2.62
G495A	SNV	chr3:49933347	64.35	7.52	18.6	4.79	1.96	2.78
G496T	SNV	chr3:49933346	58.83	5.27	26.75	3.43	3.23	2.48
G496C	SNV	chr3:49933346	64.47	7.09	15.08	8.62	1.44	3.31
G496A	SNV	chr3:49933346	64.61	5.52	20.38	5.09	1.79	2.62
C497T	SNV	chr3:49933345	56.91	4.11	27.94	3.57	4.64	2.83
C497G	SNV	chr3:49933345	53.98	4.66	27.34	2.63	6.92	4.48
C497A	SNV	chr3:49933345	64.31	4.66	20.33	4.16	2.95	3.58
T498G	SNV	chr3:49933344	59.76	4.44	25.86	4.49	1.92	3.53
T498C	SNV	chr3:49933344	50.03	6.09	36.45	4.11	1.64	1.67
T498A	SNV	chr3:49933344	60.61	6.17	22.29	6.25	2.27	2.42
G499T	SNV	chr3:49933343	56.96	5.5	27.96	4.93	2.84	1.8
G499A	SNV	chr3:49933343	61.75	6.55	22.91	5.35	1.26	2.18
G500T	SNV	chr3:49933342	63.78	7.97	20.34	5.07	0.92	1.93
G500C	SNV	chr3:49933342	64.09	5.86	22.49	3.85	1.77	1.94
G500A	SNV	chr3:49933342	57.84	12.43	21.16	5.7	1.18	1.7
G501T	SNV	chr3:49933341	67.45	7.85	16.6	6.54	0.72	0.84
G501C	SNV	chr3:49933341	49.03	10.97	28.12	6.4	2.1	3.37
G501A	SNV	chr3:49933341	62.66	8.4	19.87	5.17	1.49	2.42
C502T	SNV	chr3:49933340	70.84	8.35	12.68	5.95	0.95	1.24
C502A	SNV	chr3:49933340	70.6	9.92	12.11	5.64	0.65	1.07
C503T	SNV	chr3:49933340	48	5.39	35.28	2.15	4.74	4.44
C503A	SNV	chr3:49933339	33.5	2.91	49.31	1.64	7.69	4.95
G505T	SNV	chr3:49933339	52.94	5.95	31.37	4.28	2.88	2.58
G505A	SNV	chr3:49933338	64.85	6.93	18.96	6.52	1.15	1.59
A506T	SNV	chr3:49933338	2.76	30.67	49.58	0.13	9.11	7.75
G507T	SNV	chr3:49933338	68.88	6.5	15.12	7.79	0.62	1.1
G507C	SNV	chr3:49933337	75.45	7.41	9.8	6.99	0.18	0.17
G507A	SNV	chr3:49933337	66.93	9.27	15.55	5.44	0.94	1.86
T508C	SNV	chr3:49933337	62.2	4.5	24.91	3.78	2.36	2.24
T508A	SNV	chr3:49933336	59.95	4.7	26.02	4.28	1.88	3.17
T509C	SNV	chr3:49933336	57.87	7.71	24.66	4.46	2.29	3
T509A	SNV	chr3:49933335	59.94	4.86	25.28	3.56	2.94	3.43
G510T	SNV	chr3:49933335	71.27	9.1	10.25	7.8	0.42	1.16
G510C	SNV	chr3:49933335	54.45	5.47	28.63	7.15	3.15	1.16
G510A	SNV	chr3:49933335	66.53	6.59	19.33	4.96	1.3	1.3
GC511G	DEL	chr3:49933333	71.04	6.43	13.3	1.9	1.69	5.64
C511T	SNV	chr3:49933333	71.57	7.39	12.68	5.32	0.88	2.16
C511G	SNV	chr3:49933332	53.49	5.11	28.57	6.25	2.12	4.45
C511A	SNV	chr3:49933331	66.76	6.16	17.6	5.41	1	3.07
C512T	SNV	chr3:49933331	68.87	6.61	15.67	5.57	1.2	2.08
C512A	SNV	chr3:49933331	64.08	7.12	17.96	6.72	1.12	3
CA513C	DEL	chr3:49933331	44.44	3.23	38.23	4.29	3.74	6.06
A513T	SNV	chr3:49933330	67.78	8.07	16.5	4.8	1.27	1.58
A513G	SNV	chr3:49933330	62.34	5.64	23.34	3.43	2.17	3.08
C514T	SNV	chr3:49933329	69.88	8.72	13.61	5.85	0.87	1.07
C514A	SNV	chr3:49933329	48.63	7.87	30.82	5.29	1.3	6.09
C515T	SNV	chr3:49933328	68.61	10.77	12.71	5.9	0.69	1.32
C515G	SNV	chr3:49933328	11.44	41.65	39.63	1.26	0.88	5.13
C515A	SNV	chr3:49933328	58.89	6.49	24.91	4.73	2.1	2.87
T516G	SNV	chr3:49933328	15.3	2.73	70.68	0.46	6.77	4.06
T516C	SNV	chr3:49933327	61.84	6.02	23.29	4.48	1.97	2.4
G517T	SNV	chr3:49933327	68.23	14.57	8.12	7.51	0.73	0.84
G517C	SNV	chr3:49933327	66.96	11.49	14.32	5.55	0.89	0.78
G517A	SNV	chr3:49933326	63.36	7.64	19.76	6.43	1.52	1.29
G517GC	IN	chr3:49933326	63.99	12.32	15.98	5.76	0.52	1.42
G517GA	IN	chr3:49933326	66.35	4.53	15.21	5.39	2.16	6.36
GC518G	DEL	chr3:49933326	42.66	1.85	41.3	1.56	5.2	7.42
C518T	SNV	chr3:49933325	68.66	9.91	14.33	4.42	0.76	1.93
C519T	SNV	chr3:49933325	56.62	4.26	29.5	4.54	2.45	2.63
C519A	SNV	chr3:49933324	43.64	3.11	41.37	2.51	2.71	6.65
C520T	SNV	chr3:49933324	65.19	5.64	20.88	4.6	1.46	2.24
C520A	SNV	chr3:49933323	57.97	3.68	28.09	3.89	2.18	4.18
C521T	SNV	chr3:49933323	64.72	5.48	20.96	5.03	1.71	2.1
C521G	SNV	chr3:49933323	82.17	4.23	9.14	2.11	0.2	2.15
C521A	SNV	chr3:49933322	69.98	8.64	13.74	5.73	0.83	1.08
C522T	SNV	chr3:49933322	68.13	7.01	17.05	5.16	1.52	1.14
G525A	SNV	chr3:49933321	60.73	1.85	26.05	2.4	2.29	6.68
T526C	SNV	chr3:49933321	40.17	3.23	45.55	1.12	5.57	4.36
T526A	SNV	chr3:49933321	52.43	0.81	30.69	2.68	4.61	8.79
C527T	SNV	chr3:49933321	55.5	4.43	31.26	2.79	4.24	1.78
C527G	SNV	chr3:49933321	41.57	3.65	44.03	2.08	6.21	2.44
C527A	SNV	chr3:49933321	59.86	2.29	27.82	2.77	4.57	2.69
T528G	SNV	chr3:49933320	53.1	8.38	26.98	4.21	2.13	5.21
T528C	SNV	chr3:49933320	63.64	5.48	22.78	3.98	2.35	1.77
T528A	SNV	chr3:49933319	45.33	4.7	40.49	4.18	2.14	3.16
G529T	SNV	chr3:49933319	62.06	8.19	22.58	4.09	1.06	2.03
G529C	SNV	chr3:49933318	75.75	5.56	10.61	3.53	1.72	2.82
G529A	SNV	chr3:49933318	54.52	6.89	27.84	7.05	1.58	2.11
C530T	SNV	chr3:49933317	59.57	4.13	27.67	3.8	2.88	1.96
C530A	SNV	chr3:49933317	39.86	1.45	44.76	0.99	4.97	7.97
G531T	SNV	chr3:49933317	36.66	5.9	43.72	0.62	8.48	4.62
G531C	SNV	chr3:49933317	55.37	8.4	16.27	18.96	0.22	0.77
G531A	SNV	chr3:49933316	65.6	5.72	21.82	3.53	1.32	2
T532G	SNV	chr3:49933313	62.75	9.27	17.31	6.11	1.1	3.47
T532C	SNV	chr3:49933313	63.11	11.33	16.85	4.99	1.43	2.29
T532A	SNV	chr3:49933312	61.51	8.41	20.65	6.06	0.55	2.83
A533T	SNV	chr3:49933312	65.46	8.31	16.97	4.87	1.45	2.95
A533G	SNV	chr3:49933311	62.41	7.12	19.44	6.3	1.25	3.48
G534T	SNV	chr3:49933311	63.12	6.69	22.94	3.51	2.58	1.16
G534C	SNV	chr3:49933311	67.45	6.8	18.69	2.22	0.72	4.13
G534A	SNV	chr3:49933310	62.29	3.24	25.77	4.15	2.35	2.2
A535T	SNV	chr3:49933310	52.79	3.35	35.3	2.92	3.91	1.74
A535G	SNV	chr3:49933310	65.74	4.48	22.39	4.45	1.31	1.63
T536C	SNV	chr3:49933309	62.81	6.94	22.82	4.21	1.26	1.97
T536A	SNV	chr3:49933309	62.83	4.52	24.66	3.69	1.9	2.4
TG537T	DEL	chr3:49933309	69.9	7.44	16.18	3.78	1.36	1.34
G537T	SNV	chr3:49933308	56.04	4.36	30.72	3.39	3.09	2.4
G537C	SNV	chr3:49933308	65.27	8.03	19.99	4.15	1.16	1.39
G537A	SNV	chr3:49933308	39.38	1.51	48.89	2	5.59	2.63
G538T	SNV	chr3:49933307	62.12	4.69	24.11	3.95	2.4	2.73
G538C	SNV	chr3:49933307	64.96	7.31	19.84	4.15	1.36	2.37
G538A	SNV	chr3:49933307	62.07	4.88	24.15	4.47	2.38	2.04
T539G	SNV	chr3:49933306	56.91	4.03	29.9	3.43	5.39	0.34
T539C	SNV	chr3:49933306	63.62	6.77	20.82	5.86	1.08	1.85
T539A	SNV	chr3:49933306	60.95	7.6	24.91	3.63	0.64	2.27
G540T	SNV	chr3:49933305	56.54	1.66	32.93	2.97	4.29	1.61
G540A	SNV	chr3:49933305	44.23	1.81	43.33	2.4	4.33	3.9
A541T	SNV	chr3:49933304	60.23	4.26	27.32	4.82	1.85	1.51
A541G	SNV	chr3:49933304	62.82	7.15	21.51	5.16	1.22	2.14
A541C	SNV	chr3:49933304	68.38	4.5	19.48	4.08	2.17	1.39
A542G	SNV	chr3:49933303	59.41	4.9	27.85	2.92	2.52	2.4
T543G	SNV	chr3:49933303	57.8	12.47	22.99	4.01	1.2	1.53
T543C	SNV	chr3:49933302	65.48	9.25	14.57	6.71	1.57	2.42
T543A	SNV	chr3:49933302	62.42	6.24	24.82	3.46	1.4	1.65
G544T	SNV	chr3:49933302	56.21	6.45	29.13	3.16	2.3	2.76
G544C	SNV	chr3:49933301	64.14	9.53	18.87	4.11	1.24	2.11
G544A	SNV	chr3:49933301	63.19	4.84	25.36	3.79	1.45	1.36
T545G	SNV	chr3:49933301	47.6	5.99	34.58	8.57	1.05	2.22
T545C	SNV	chr3:49933300	62.7	6.37	22.05	5.17	1.74	1.97
T545A	SNV	chr3:49933300	61.18	7.03	22.65	5.87	1.37	1.91
C546T	SNV	chr3:49933300	58.29	4.6	27.28	3.26	3.29	3.29
C546A	SNV	chr3:49933299	53.76	3.15	33.64	4.59	3.38	1.48
A547T	SNV	chr3:49933299	63.14	5.45	21.32	4.19	2.66	3.23
A547G	SNV	chr3:49933299	63.73	7.78	18.23	5.95	1.42	2.88
A547C	SNV	chr3:49933298	64.13	11.98	17.08	2.9	1.62	2.3
T548C	SNV	chr3:49933298	64.3	8.52	18.22	6.54	0.83	1.58
T548A	SNV	chr3:49933297	63.44	6	22.02	4.59	1.58	2.38
A549G	SNV	chr3:49933297	64.23	5.29	22.64	4.48	1.41	1.95
A549C	SNV	chr3:49933297	67.79	2.43	19.2	5.5	3.48	1.61
AT550A	DEL	chr3:49933296	66.04	7.62	19.7	3.86	1.26	1.52
T550C	SNV	chr3:49933296	62.07	7.11	23.36	4.56	1.52	1.38
T550A	SNV	chr3:49933295	58.05	5.46	27.67	4.91	2.68	1.23
TC551T	DEL	chr3:49933295	63.59	5.41	21.72	3.32	3.65	2.31
C551T	SNV	chr3:49933295	62.28	2.76	24.59	3.87	2.24	4.25
C551G	SNV	chr3:49933294	56.2	3.2	33.39	3.54	1.49	2.18
C551A	SNV	chr3:49933294	57.41	2.4	32.53	2.27	3.96	1.44
C552T	SNV	chr3:49933294	50.71	2.79	32.77	3.05	3.49	7.19
C552G	SNV	chr3:49933293	67.29	4.87	20.06	4.6	1.87	1.32
C552A	SNV	chr3:49933293	55.94	5.13	31.81	3.43	2.4	1.29
T553G	SNV	chr3:49933293	60.7	5.05	26.02	4.26	2.18	1.78
T553C	SNV	chr3:49933292	65.57	6.49	19.8	4.7	1.38	2.05
T553A	SNV	chr3:49933292	61.99	4.81	26.13	3.46	1.79	1.82
TG554T	DEL	chr3:49933291	69.31	10.32	13.07	4	1.09	2.21
G554C	SNV	chr3:49933291	62.85	4.42	18.59	7.08	0.88	6.18
G555C	SNV	chr3:49933291	61.67	5.36	18.07	10.84	0.93	3.12
G555A	SNV	chr3:49933290	66.98	7.56	16.9	5.65	1.17	1.74
G556C	SNV	chr3:49933290	68.71	7.53	16.18	4.32	1.04	2.22
G556A	SNV	chr3:49933289	61.13	12.61	15.58	7.27	0.94	2.47
GT557G	DEL	chr3:49933289	31.77	33.18	20.14	13.64	1.09	0.17
T557C	SNV	chr3:49933289	65.63	7.57	17.02	5.9	1.19	2.7
T557A	SNV	chr3:49933288	62.61	10.89	15.69	6.55	0.59	3.67
A558T	SNV	chr3:49933288	60.47	7.42	21.46	6.27	1.49	2.88
A558G	SNV	chr3:49933288	60.59	7.54	23.07	5.12	1.91	1.78
G559T	SNV	chr3:49933287	62.53	4.7	23.09	3.86	2.07	3.76
G559A	SNV	chr3:49933287	60.48	6.87	22.71	4.81	2.58	2.56
A560T	SNV	chr3:49933287	65.78	5.68	19.95	4.19	2.15	2.26
A560C	SNV	chr3:49933286	66.9	3.02	23.13	4.18	1.44	1.33
G561T	SNV	chr3:49933286	53.96	5.84	24.02	8.01	1.83	6.34
G561C	SNV	chr3:49933286	55.8	9.38	24.72	4.59	2.32	3.19
G561A	SNV	chr3:49933285	64.47	6.15	21.86	4.23	1.68	1.61
T562C	SNV	chr3:49933285	63.97	9.04	18.49	4.79	1.35	2.35
T562A	SNV	chr3:49933285	65.15	6.35	20.01	5.12	1.59	1.78
TG563T	DEL	chr3:49933285	82.18	3.89	7.29	2.83	1.07	2.75
G563T	SNV	chr3:49933284	62.82	7.48	21.71	4.56	0.89	2.54
G563C	SNV	chr3:49933283	74.7	4.97	14.06	4.69	0.85	0.73
G563A	SNV	chr3:49933283	57.68	3.26	33.13	2.77	1.73	1.43
G564C	SNV	chr3:49933283	63.47	13.23	15.31	2.44	2.12	3.42
G564A	SNV	chr3:49933282	61.98	9.95	18.57	4.78	1.16	3.57
T565G	SNV	chr3:49933282	43.97	1.42	42.51	0.23	10.93	0.94
T565C	SNV	chr3:49933282	63.82	8.18	18.39	5.6	1.38	2.62
T565A	SNV	chr3:49933281	67.78	4.9	18.03	6.03	1.46	1.81
G566T	SNV	chr3:49933281	33.43	34.19	25.85	2.97	1.26	2.31
G566A	SNV	chr3:49933280	61.1	5.89	25.44	4.17	1.31	2.09
GC567G	DEL	chr3:49933280	54.45	3.02	24.62	2.61	14.73	0.57
C567T	SNV	chr3:49933279	62.5	4.08	25.59	3.82	2.37	1.65
C567G	SNV	chr3:49933279	36.69	0.81	48.59	0.9	12.46	0.54
C567A	SNV	chr3:49933278	61.16	2.35	28.87	5.01	1.77	0.84
G568T	SNV	chr3:49933278	71.03	4	17.65	4.4	1.11	1.82
G568A	SNV	chr3:49933277	61.66	5.87	24.43	4.58	1.67	1.79
G569T	SNV	chr3:49933277	69.13	7.27	16.42	3.76	0.51	2.9
G569C	SNV	chr3:49933277	51.62	13.97	19.76	9.73	1.62	3.31
G569A	SNV	chr3:49933276	57.92	11.79	20.92	5.39	1.68	2.29
GC570G	DEL	chr3:49933276	68.11	7.67	15.89	3.75	1.26	3.32
C570T	SNV	chr3:49933276	49.33	4.51	38.69	3.29	3.15	1.03
C570G	SNV	chr3:49933275	33.58	0.78	48.05	0.41	15.23	1.94
C570A	SNV	chr3:49933275	58.43	3.63	28.74	5.6	1.6	1.99
C571T	SNV	chr3:49933275	61.8	2.92	27.98	3.39	3.18	0.73
C571G	SNV	chr3:49933274	66.4	9.23	17.18	3.56	0.95	2.68
C571A	SNV	chr3:49933274	70.14	5.46	14.71	6.79	1.42	1.48
CA572C	DEL	chr3:49933273	68.19	11.29	12.83	2.81	1.34	3.54
A572T	SNV	chr3:49933273	68.36	5.67	17.09	4.81	2.17	1.9
A572G	SNV	chr3:49933273	60.51	4.72	26.43	3.62	2.65	2.07
A572C	SNV	chr3:49933272	64.26	9.68	17.58	5.85	0.91	1.72
A572AG	IN	chr3:49933272	75.1	8.26	7.56	3.88	3.49	1.71
AG573A	DEL	chr3:49933272	76.27	7.23	8.5	1.91	0.41	5.68
G573T	SNV	chr3:49933271	61.96	10.28	18.3	4.82	1.29	3.36
G573A	SNV	chr3:49933271	61.72	9.21	18.81	6.79	0.6	2.87
G574T	SNV	chr3:49933271	71	5.14	13.71	5.84	1.72	2.59
G574C	SNV	chr3:49933270	71.51	5.23	13.66	5.29	2.29	2.01
G574A	SNV	chr3:49933270	62.86	10.28	16.14	6.34	0.79	3.6
G575T	SNV	chr3:49933269	59.67	11.93	17.74	7.17	1.06	2.42
G575C	SNV	chr3:49933269	62.57	8.68	19.19	4.92	1.38	3.26
G575A	SNV	chr3:49933269	63.36	7.67	18.65	5.45	1.32	3.55
GC576G	DEL	chr3:49933269	65.29	5.24	23.18	1.52	2.42	2.35
C576T	SNV	chr3:49933268	61.23	4.93	25.2	4.29	2.45	1.9
C576G	SNV	chr3:49933268	60.94	5.85	25.37	3.76	2.83	1.25
C576A	SNV	chr3:49933268	65.41	3.19	23	4.29	2.58	1.52
C577T	SNV	chr3:49933267	48.22	3.9	39.07	2.77	4.77	1.26
C577G	SNV	chr3:49933267	45.05	21.05	20.37	10.76	2.11	0.67
C577A	SNV	chr3:49933267	59.65	4.87	26.35	5.39	2.42	1.32
A578T	SNV	chr3:49933267	62.37	6.79	21.55	5.24	1.91	2.14
A578G	SNV	chr3:49933266	65.72	7.9	17.27	5.37	1.57	2.18
A578C	SNV	chr3:49933266	60.96	13.52	18.52	3.75	1.61	1.64
G579T	SNV	chr3:49933266	65.3	5.47	20.06	3.73	1.45	3.98
G579C	SNV	chr3:49933266	68.88	4.72	18.8	4.34	1.65	1.62
G579A	SNV	chr3:49933266	56.35	6.69	28.87	3.66	3.07	1.37
A580T	SNV	chr3:49933265	57.45	5.02	28.38	4.21	2.28	2.67
A580G	SNV	chr3:49933265	57.6	3.46	31.88	2.75	2.87	1.46
T581G	SNV	chr3:49933264	76.48	1.13	14.44	5.65	1.61	0.68
T581C	SNV	chr3:49933264	60.87	7.51	21.54	6.29	1.38	2.41
T581A	SNV	chr3:49933264	65.72	7.06	18.32	4.94	1.44	2.52
T581TC	IN	chr3:49933263	63.52	3.82	26.18	4.19	1.53	0.75
T581TA	IN	chr3:49933263	62.09	2.26	29.9	1.6	2.32	1.83
TG582T	DEL	chr3:49933263	77.67	6.74	10.42	2.65	1.12	1.4
G582T	SNV	chr3:49933263	62.7	6.7	23.25	4.38	1.75	1.23
G582A	SNV	chr3:49933262	47.86	3.22	44.01	1.83	2.02	1.06
G583T	SNV	chr3:49933262	49.08	10.16	27.81	6.97	2.87	3.11
G583A	SNV	chr3:49933262	67.24	6.93	18.33	3.7	1.12	2.69
G584T	SNV	chr3:49933261	64.57	7.44	17.54	6.35	1.39	2.7
G584C	SNV	chr3:49933261	53.06	11.53	15.23	13.56	1.86	4.76
G584A	SNV	chr3:49933261	66.94	8.75	13.82	6.77	1.01	2.72
G585T	SNV	chr3:49933260	61.03	4.91	22.21	8.38	0.9	2.56
G585C	SNV	chr3:49933260	52.6	7.52	32.53	4.47	0.43	2.45
G585A	SNV	chr3:49933260	60.91	8.53	20.23	5.61	1.1	3.62
T586G	SNV	chr3:49933259	61.99	7.99	21.48	4.93	1.52	2.09
T586C	SNV	chr3:49933259	63.34	7.04	20.47	5.1	1.67	2.38
T586A	SNV	chr3:49933259	62.29	7.56	17.15	7.29	0.94	4.78
TC587T	DEL	chr3:49933258	67.27	9.26	15.48	3.98	1.46	2.55
C587T	SNV	chr3:49933258	63.27	5.92	21.89	5.68	1.22	2.02
C587G	SNV	chr3:49933257	86.77	0.16	5.83	4.71	2.36	0.17
C587A	SNV	chr3:49933257	66.11	3.55	21.52	4.65	2.84	1.33
C588T	SNV	chr3:49933257	63.51	4.03	21.62	6.52	1.38	2.94
C588A	SNV	chr3:49933257	57.37	7.17	27.8	4.06	0.92	2.68
C589T	SNV	chr3:49933257	64.05	5.14	21.42	4.85	2	2.53
C589G	SNV	chr3:49933257	58.81	6.96	24.33	5.52	2.1	2.27
C589A	SNV	chr3:49933256	62.55	6.96	18.91	5.29	2.81	3.46
A590T	SNV	chr3:49933256	59.29	5.28	25.72	5.12	2.44	2.14
A590G	SNV	chr3:49933255	61.98	6.91	22.77	4.87	1.44	2.03
A590C	SNV	chr3:49933255	47.25	3.79	34.12	6.03	3.22	5.58
C591T	SNV	chr3:49933254	59.78	4.53	27.6	4.54	2.28	1.27
C591G	SNV	chr3:49933254	60.66	6.43	23.05	5.96	1.7	2.19
C591A	SNV	chr3:49933254	60.5	4.49	24.47	5.85	2.92	1.77
A592T	SNV	chr3:49933253	64.36	4.48	21.84	6.04	1.28	2
A592G	SNV	chr3:49933253	59.11	3.23	28.64	4.65	3.04	1.32
A592C	SNV	chr3:49933253	59.52	8.54	23.75	4.16	1.39	2.65
G593T	SNV	chr3:49933252	56.39	6	30.38	3.47	2.26	1.5
G593A	SNV	chr3:49933252	63.33	6.01	22.77	4.51	1.67	1.71
A594T	SNV	chr3:49933252	53.63	6.54	29.06	5.7	2.3	2.77
A594G	SNV	chr3:49933252	49.16	2.69	41.27	2.38	3.42	1.08
A594C	SNV	chr3:49933251	66.34	3.53	18.76	9.04	1.19	1.14
G595T	SNV	chr3:49933251	62.11	7.09	23.87	4.19	1.29	1.45
G595C	SNV	chr3:49933251	56.89	14.37	21.87	3.63	0.89	2.34
G595A	SNV	chr3:49933250	62.58	6.56	19.63	6.29	1.72	3.22
C596T	SNV	chr3:49933250	61.23	5.4	24.49	4.51	2.25	2.11
C596A	SNV	chr3:49933249	64.41	8.07	17.17	6.39	1.93	2.03
A597T	SNV	chr3:49933249	68.36	5.85	19.28	3.25	1.66	1.6
A597G	SNV	chr3:49933249	59.39	8.3	23.6	4.73	1.65	2.33
A597C	SNV	chr3:49933248	55.8	4.52	30.54	3.56	1.21	4.38
C598T	SNV	chr3:49933248	63.47	6.01	22.83	4.05	1.54	2.1
C598G	SNV	chr3:49933248	63.19	2.58	25.38	3.45	2.64	2.76
C598A	SNV	chr3:49933247	43.66	4.58	42.16	5.35	1.18	3.07
G599T	SNV	chr3:49933247	60.56	7.27	22.72	4.79	1.7	2.97
G599A	SNV	chr3:49933247	64.05	6.39	20.5	5.2	1.61	2.25
C600T	SNV	chr3:49933246	59.82	7.92	19.09	10.1	0.94	2.12
C600A	SNV	chr3:49933246	57.46	5.77	26.88	5.58	1.61	2.7
T601C	SNV	chr3:49933246	56.84	5.44	29.4	4.23	1.94	2.14
T601A	SNV	chr3:49933245	60.08	4.09	29.98	4.74	0.47	0.64
TC602T	DEL	chr3:49933245	72.12	6.29	13.04	4.04	1.71	2.8
C602T	SNV	chr3:49933244	64.4	6.88	17.94	6.59	1.96	2.23
C602G	SNV	chr3:49933244	64.4	5.89	21.05	5.58	1.37	1.71
C603T	SNV	chr3:49933244	50.39	7.29	33.19	6.1	1.65	1.37
C603G	SNV	chr3:49933243	60.32	7.16	21.95	6.58	2.73	1.26
C603A	SNV	chr3:49933243	62.36	5.05	24.65	3.75	1.47	2.72
CT604C	DEL	chr3:49933243	66.02	10.88	14.44	4.05	1.08	3.53
T604G	SNV	chr3:49933242	62.5	3.68	25.8	3.49	3.04	1.48
T604C	SNV	chr3:49933242	61.52	6	24.22	4.68	2.14	1.45
T604A	SNV	chr3:49933241	63.85	7.06	20.95	4.93	1.33	1.88
T605G	SNV	chr3:49933241	60.11	5.8	25.24	4.38	2.09	2.38
T605C	SNV	chr3:49933241	65.86	6.44	19.38	4.99	1.22	2.1
T605A	SNV	chr3:49933240	60.33	3.89	27.41	2.88	3.9	1.6
TG606T	DEL	chr3:49933240	67.39	8.85	16.53	3.37	1.29	2.57
G606T	SNV	chr3:49933240	62.87	7.05	23.08	4.16	1.28	1.56
G606A	SNV	chr3:49933239	53.2	5.67	32.67	4.63	2.35	1.48
G607T	SNV	chr3:49933239	56.9	7.37	27.83	3.56	2.4	1.95
G607C	SNV	chr3:49933238	57.85	3.08	29.6	4.61	3.83	1.03
G607A	SNV	chr3:49933238	61.74	6.06	23.19	5.13	2.07	1.81
T608C	SNV	chr3:49933237	56.84	6.43	27.3	5.21	1.51	2.71
T608A	SNV	chr3:49933237	62.46	10.25	14.08	7.94	1.54	3.72
A609T	SNV	chr3:49933237	65.94	6.04	19.72	4.9	1.69	1.71
A609G	SNV	chr3:49933236	64.2	6.95	20.86	4.66	0.92	2.42
T610G	SNV	chr3:49933236	57.47	6.94	27.17	2.77	2.1	3.55
T610C	SNV	chr3:49933235	53.64	4.65	34.06	3.47	2.1	2.08
T610A	SNV	chr3:49933235	61.2	6.78	23.49	5.03	1.68	1.81
C611T	SNV	chr3:49933235	61.09	10.79	19.37	3.34	0.88	4.54
C611G	SNV	chr3:49933235	64.49	3.96	23.22	1.81	4.65	1.87
C611A	SNV	chr3:49933234	58.96	4.4	27.61	5.17	1.6	2.26
C612T	SNV	chr3:49933234	60.63	3.22	28.09	3.66	2.73	1.67
C612G	SNV	chr3:49933234	53.3	5.11	31.21	4.18	4.93	1.27
C612A	SNV	chr3:49933233	59.19	5.22	27.68	3.75	2.2	1.96
CT613C	DEL	chr3:49933233	79.34	5.37	8.52	2.53	2.24	2
T613C	SNV	chr3:49933233	65.02	5.04	21.96	4.19	1.74	2.05
T613A	SNV	chr3:49933233	62.19	6.69	22.91	4.49	1.47	2.25
G614T	SNV	chr3:49933232	60.03	4.91	27.22	3.27	2.36	2.21
G614C	SNV	chr3:49933232	64.61	8.62	18.16	2.64	2.02	3.95
G614A	SNV	chr3:49933231	57.64	4.32	30.44	3.62	1.97	2.02
C615T	SNV	chr3:49933231	61.57	4.36	26.41	3.42	2.33	1.91
C615G	SNV	chr3:49933231	62.37	5.87	23.71	4.37	1.64	2.04
C615A	SNV	chr3:49933230	58.32	7.7	25.79	4.78	1.52	1.9
T616C	SNV	chr3:49933230	63.67	5.49	22.89	4.62	1.55	1.77
T616A	SNV	chr3:49933229	53.12	4.27	27.23	4.51	2.74	8.13
G617T	SNV	chr3:49933229	60.88	8.7	19.33	2.73	3.37	5
G617C	SNV	chr3:49933228	62.1	6.07	22.5	5.48	2.22	1.64
G617A	SNV	chr3:49933228	60.79	6.23	23.46	5.28	1.74	2.5
GC618G	DEL	chr3:49933228	70.05	9.26	11.75	3.03	1.16	4.75
C618T	SNV	chr3:49933227	63.16	7.95	18.85	5.76	1.52	2.76
C618G	SNV	chr3:49933227	63.29	4.88	13.31	13.67	2.9	1.95
C618A	SNV	chr3:49933227	70.17	11.32	11.46	4.82	1.51	0.72
C619T	SNV	chr3:49933226	67.58	6.21	16.79	4.28	2.01	3.13
C619G	SNV	chr3:49933226	61.47	6.46	18.68	7.44	1	4.96
C619A	SNV	chr3:49933226	67.52	7.08	16.42	4.75	1.61	2.63
C619CT	IN	chr3:49933226	73.4	8.03	12.13	2.86	1.13	2.44
CT620C	DEL	chr3:49933225	57	23.39	14.45	2.57	0.94	1.65
T620C	SNV	chr3:49933225	59.92	7.12	24.33	5.15	1.64	1.83
T620A	SNV	chr3:49933224	59.28	7.2	24.24	5.57	1.97	1.73
T621G	SNV	chr3:49933224	54.75	7.29	27.16	7.24	2.39	1.17
T621C	SNV	chr3:49933224	66.79	5.64	19.58	3.66	1.62	2.72
T621A	SNV	chr3:49933223	62.64	7.65	20.36	5.76	1.31	2.29
T622C	SNV	chr3:49933223	67.73	6.24	17.33	4.17	1.73	2.79
T622A	SNV	chr3:49933223	61.04	5.9	23.67	4.31	2.15	2.93
G623T	SNV	chr3:49933222	43.78	0.06	22.8	0.22	30.74	2.39
G623A	SNV	chr3:49933222	65.08	8.1	18.11	4.6	0.92	3.2
C624T	SNV	chr3:49933221	63.23	8.11	18.63	5.45	1.79	2.78
C624G	SNV	chr3:49933221	61.47	4.17	25.35	5.63	1.3	2.09
C624A	SNV	chr3:49933221	65.57	9.96	14.86	4	0.91	4.7
T625G	SNV	chr3:49933221	45.98	10.54	32.4	4.03	5.24	1.82
T625C	SNV	chr3:49933220	64.77	4.82	22.86	3.71	1.98	1.86
T625A	SNV	chr3:49933220	44.42	6.07	38.13	4.32	4.49	2.58
G626T	SNV	chr3:49933220	58.91	8.15	23.41	6.25	1.6	1.67
G626A	SNV	chr3:49933219	61.1	7.31	22.45	4.33	1.96	2.85
C627T	SNV	chr3:49933219	63.28	6.94	21.39	4.59	1.85	1.96
C627G	SNV	chr3:49933219	62.16	4.99	24.78	4.31	1.5	2.27
C627A	SNV	chr3:49933219	63.31	8.27	19.4	5.05	1.44	2.52
T628G	SNV	chr3:49933219	63.55	4.52	23.83	4.62	1.16	2.31
T628C	SNV	chr3:49933218	67.24	4.35	21.46	3.67	1.6	1.69
T628A	SNV	chr3:49933218	58.04	4.58	27.31	6.14	2.29	1.64
TG629T	DEL	chr3:49933218	62.14	4.31	24.54	5.76	1.61	1.65
G629T	SNV	chr3:49933217	61.02	8.52	22.77	3.89	1.39	2.4
G629C	SNV	chr3:49933217	60.49	6.54	24.51	4.7	2.08	1.68
G629A	SNV	chr3:49933217	57.83	5.42	28.94	4.3	1.28	2.23
C630T	SNV	chr3:49933216	62.55	6.09	22.12	5.95	1.18	2.11
C630G	SNV	chr3:49933216	68.44	4.95	19.03	3.2	2.14	2.24
C630A	SNV	chr3:49933215	65.85	5.79	19.77	5.4	1.59	1.59
T631G	SNV	chr3:49933215	64.98	6.84	19	5.3	1.17	2.7
T631C	SNV	chr3:49933214	67.14	5.28	20.4	3.97	1.48	1.73
T631A	SNV	chr3:49933214	62.99	6.21	20.52	6.17	1.45	2.66
T632C	SNV	chr3:49933214	64.7	6.12	20.09	5.33	1.52	2.24
T632A	SNV	chr3:49933213	62.53	5.42	24.52	3.42	2.22	1.89
G633T	SNV	chr3:49933213	68.32	4.07	19.28	4.96	0.5	2.86
G633C	SNV	chr3:49933213	60.36	13.55	18.55	3.85	1.18	2.52
G633A	SNV	chr3:49933212	60.35	7.01	23.74	5.37	1.54	1.99
T634C	SNV	chr3:49933212	60.37	8.08	22.96	4.97	1.81	1.82
T634A	SNV	chr3:49933211	60.86	6.74	23.37	4.97	1.84	2.23
TG635T	DEL	chr3:49933211	68.64	7.06	11.53	6.3	0.89	5.58
G635T	SNV	chr3:49933211	57.58	11.16	22.44	5.81	1.24	1.77
G635C	SNV	chr3:49933210	57.8	4.81	28.37	3.81	3.12	2.08
G635A	SNV	chr3:49933210	67.94	4.09	21.05	3.9	1.61	1.42
G636T	SNV	chr3:49933210	60.05	12.15	17.94	5.04	1.32	3.5
G636C	SNV	chr3:49933210	70.51	7.08	17.92	3.35	0.26	0.89
G636A	SNV	chr3:49933209	64.49	6.89	17.74	6.68	1.37	2.84
C637T	SNV	chr3:49933209	62.13	5.8	23.6	4.68	1.71	2.08
C637G	SNV	chr3:49933209	73.59	6.13	12.46	4.9	1.69	1.24
C637A	SNV	chr3:49933208	66.85	9.53	14.13	5.88	1.08	2.53
T638C	SNV	chr3:49933208	65.9	4	21.38	4.7	2.03	1.98
T638A	SNV	chr3:49933208	60.25	5.07	25.82	5.29	1.95	1.61
G639T	SNV	chr3:49933207	65.43	9.02	17.61	4.71	1.05	2.17
G639C	SNV	chr3:49933207	64.31	5.88	21.79	3.3	2.24	2.48
G639A	SNV	chr3:49933207	65.67	7.16	16.78	6.23	1.81	2.35
C640T	SNV	chr3:49933206	69.63	6.02	16.22	3.83	1.9	2.4
C640G	SNV	chr3:49933206	63.9	5.37	27.16	0.34	2.51	0.72
C640A	SNV	chr3:49933205	62.45	4.03	25.7	2.63	3.27	1.93
A641T	SNV	chr3:49933205	66.53	5.57	18.76	4.13	2.54	2.47
A641G	SNV	chr3:49933205	65.92	6.36	19.15	4.82	1.74	2.01
A641C	SNV	chr3:49933204	72.97	3.86	15.66	3.66	2.23	1.61
C642T	SNV	chr3:49933204	64.23	6.13	22.06	4.46	1.43	1.69
C642G	SNV	chr3:49933204	67.59	5.27	20.05	4.04	1.56	1.49
C642A	SNV	chr3:49933203	60.72	5.67	23.68	6.58	1.98	1.37
T643G	SNV	chr3:49933203	63.58	3.45	23.33	6.5	2.4	0.73
T643C	SNV	chr3:49933203	66.34	7.25	17.6	4.95	1.48	2.39
T643A	SNV	chr3:49933202	64.41	5.33	22.26	4.29	1.78	1.93
G644T	SNV	chr3:49933202	63.5	6.57	20.38	5.6	1.61	2.35
G644C	SNV	chr3:49933202	63.86	8.1	18.35	5.94	1.43	2.31
G644A	SNV	chr3:49933201	61.23	6.47	22.65	5.37	1.47	2.8
G645T	SNV	chr3:49933201	54.93	6.7	24.06	9.94	2.43	1.94
G645C	SNV	chr3:49933201	66.27	8.08	13.81	4.77	0.92	6.15
G645A	SNV	chr3:49933200	67.89	7.05	15.55	4.78	1.64	3.09
C646T	SNV	chr3:49933200	64.7	3	24.91	3.83	2	1.55
C646G	SNV	chr3:49933199	63.37	4.88	24.1	3.91	1.68	2.07
C646A	SNV	chr3:49933199	58.31	6.64	26.71	3.98	1.37	3
G647T	SNV	chr3:49933199	52.39	2.5	27.33	13.22	2.55	2.02
G647C	SNV	chr3:49933198	54.52	5.04	31.69	2.93	4.55	1.28
G647A	SNV	chr3:49933198	61.06	5.52	24.08	5.28	2.19	1.87
A648T	SNV	chr3:49933198	62.06	7.43	22.61	4.74	1.42	1.74
A648G	SNV	chr3:49933197	55.83	3.68	32.37	3.27	3.42	1.44
A648C	SNV	chr3:49933197	61.84	7.08	26.24	1.77	0.86	2.21
C649T	SNV	chr3:49933197	62.89	5.01	24.78	4.25	1.68	1.39
C649G	SNV	chr3:49933196	67.53	6.7	17.52	3.87	1.73	2.66
C649A	SNV	chr3:49933196	61.46	10.47	18.56	5.35	1.64	2.52
T650G	SNV	chr3:49933196	54.64	8.38	24.96	5.89	1.51	4.62
T650C	SNV	chr3:49933195	57.9	4.38	30.41	3.2	2.58	1.54
T650A	SNV	chr3:49933195	59.19	4.81	27.2	3.96	2.32	2.51
G651T	SNV	chr3:49933195	65.56	5.97	19.41	5.22	1.57	2.26
G651A	SNV	chr3:49933194	61.96	6.69	23.17	4.4	1.83	1.94
C652T	SNV	chr3:49933194	61.06	5.75	25.3	4.46	1.87	1.57
C652G	SNV	chr3:49933194	65.38	15.33	12.12	4.98	1.42	0.77
C652A	SNV	chr3:49933193	67.24	5.99	17.38	5.37	2.51	1.52
A653T	SNV	chr3:49933193	59.73	6.9	24.64	4.55	1.69	2.5
A653G	SNV	chr3:49933193	56.96	2.73	32.94	2.29	3.83	1.26
A653C	SNV	chr3:49933192	58.8	5.58	28.13	4.28	2.22	0.99
C654T	SNV	chr3:49933192	60.5	7.96	21.33	6.4	1.24	2.56
C654G	SNV	chr3:49933192	63.25	5.78	24.27	4.75	1.11	0.84
C654A	SNV	chr3:49933191	63.8	6.06	20.25	6.6	1.45	1.84
T655G	SNV	chr3:49933191	59.87	8.66	20.8	7.02	1.91	1.74
T655C	SNV	chr3:49933191	61.34	6.35	22.94	4.93	2.27	2.17
T655A	SNV	chr3:49933190	64.13	5.9	22.28	4.21	1.65	1.83
TG656T	DEL	chr3:49933190	48.38	20.5	18.8	4.75	1.37	6.2
G656T	SNV	chr3:49933190	62.87	6.53	21.64	5.35	1.86	1.76
G656C	SNV	chr3:49933189	69.22	4.81	19.3	3.88	1.39	1.39
G656A	SNV	chr3:49933189	59.35	5.89	26.71	3.84	2.24	1.97
G657C	SNV	chr3:49933189	71.92	5.75	14.08	4.97	1.27	2
G657A	SNV	chr3:49933188	63.3	6.93	20.66	5.35	1.71	2.05
T658G	SNV	chr3:49933188	57.52	2.47	29.45	5.85	1.96	2.76
T658C	SNV	chr3:49933188	60.44	6.02	25.99	4.2	1.71	1.65
T658A	SNV	chr3:49933187	61.18	6.64	21.81	7.17	0.93	2.27
C659T	SNV	chr3:49933187	60.75	4.91	26.58	2.58	2.82	2.36
C659A	SNV	chr3:49933187	49.65	8.36	35.56	1.96	2.37	2.1
T660C	SNV	chr3:49933186	60.54	5.1	26.58	3.71	2.12	1.96
T660A	SNV	chr3:49933186	58.48	6.24	26.34	4.17	2.51	2.26
T661G	SNV	chr3:49933186	56.28	5.4	30.67	3.29	3.29	1.07
T661C	SNV	chr3:49933185	62.84	5.01	25	4.07	1.41	1.67
T661A	SNV	chr3:49933185	61.46	7.08	22.43	5.4	1.63	2
C662T	SNV	chr3:49933185	53.81	3.8	33.24	3.01	4.71	1.42
C662A	SNV	chr3:49933184	36.68	2.69	49.73	5.88	3.27	1.76
A663T	SNV	chr3:49933184	62.85	4.46	25.89	3.09	1.88	1.82
A663G	SNV	chr3:49933184	65.55	6.3	19.92	4.84	1.31	2.09
A663C	SNV	chr3:49933183	62.68	3.73	24.52	4.96	2.12	2
G664T	SNV	chr3:49933183	62.41	8.03	20.46	4.84	1.68	2.58
G664A	SNV	chr3:49933183	59.6	9.89	22.44	4.35	1.72	2
C665T	SNV	chr3:49933183	57.9	5.85	27.44	4.46	2.54	1.81
C665G	SNV	chr3:49933182	66	3.99	23.39	3.61	1.38	1.63
C665A	SNV	chr3:49933182	58.72	6.75	27.6	3.82	1.52	1.6
T666G	SNV	chr3:49933182	62.19	8.52	25.35	1.12	2.53	0.28
T666C	SNV	chr3:49933181	66.97	3.87	23.09	2.68	2.16	1.23
T666A	SNV	chr3:49933181	60.2	8.34	22.44	5.29	1.21	2.52
A667T	SNV	chr3:49933180	63.73	7.69	20.32	4.84	1.19	2.21
A667G	SNV	chr3:49933180	61.75	5.13	23.84	4.88	2.2	2.2
C668T	SNV	chr3:49933180	63.45	6.11	22.06	4.55	1.64	2.19
C668A	SNV	chr3:49933179	66.77	3.09	21.97	4.7	1.99	1.48
T669G	SNV	chr3:49933179	50.05	15.5	28.15	3.19	1.2	1.9
T669C	SNV	chr3:49933178	60.33	5.44	27	3.74	1.71	1.78
T669A	SNV	chr3:49933178	67.39	5.31	19.42	4.72	1.57	1.59
TG670T	DEL	chr3:49933177	69.05	11.77	12.21	4.17	0.7	2.1
G670T	SNV	chr3:49933177	62.69	4.77	23.16	5.36	1.78	2.25
G670C	SNV	chr3:49933177	65.29	5.29	19.46	6.18	1.67	2.11
G670A	SNV	chr3:49933176	61.94	7.75	22.42	4.14	1.92	1.83
G671T	SNV	chr3:49933176	72.72	12.27	8.48	3.82	0.94	1.77
G671A	SNV	chr3:49933175	60.37	7.38	23.66	5.33	1.05	2.21
GT672G	DEL	chr3:49933175	75.33	5.89	7.72	6.92	0.75	3.39
T672C	SNV	chr3:49933175	61.06	8.75	21.22	5.51	1.46	2
T672A	SNV	chr3:49933174	60.75	5.99	23.69	5.15	2.1	2.31
TG673T	DEL	chr3:49933174	73.13	4.1	16.26	2.06	1.56	2.88
G673T	SNV	chr3:49933174	59.51	7.2	24.21	5.32	1.34	2.42
G673C	SNV	chr3:49933173	57.88	8.41	25.15	4.08	1.59	2.88
G673A	SNV	chr3:49933173	57.31	6.74	29.23	2.89	2.02	1.81
G674T	SNV	chr3:49933173	57.81	7.82	23.43	7.59	1.59	1.75
G674C	SNV	chr3:49933172	59.01	4.2	28.24	3.02	2.98	2.55
G674A	SNV	chr3:49933172	63.52	7.26	19.44	6.8	1.04	1.93
C675T	SNV	chr3:49933172	65.64	5.66	20.18	4.9	1.76	1.88
C675G	SNV	chr3:49933171	65.35	4.27	23.73	2.49	2.29	1.86
C675A	SNV	chr3:49933171	60.97	8.18	23.65	4.95	1.01	1.23
CG676C	DEL	chr3:49933170	64.8	8.09	14.96	4.82	4.52	2.81
G676T	SNV	chr3:49933170	63.05	4.32	26.17	2.99	1.82	1.65
G676C	SNV	chr3:49933169	65.35	3.26	21.18	5.8	2.54	1.89
G676A	SNV	chr3:49933169	63.36	5	24.52	3.65	1.5	1.97
G677T	SNV	chr3:49933169	68.12	4.87	19.54	3.43	1.67	2.37
G677A	SNV	chr3:49933169	43.8	8.72	37.39	3.5	1.97	4.61
A678T	SNV	chr3:49933168	66.11	6.48	19	5.01	1.42	1.98
A678G	SNV	chr3:49933168	59.03	4.94	30.16	2.5	1.74	1.63
AG679A	DEL	chr3:49933168	69.22	9.51	14.03	3.27	1.57	2.4
G679T	SNV	chr3:49933167	61.84	6.48	22.37	4.93	1.91	2.47
G679A	SNV	chr3:49933167	67.36	6.48	18.68	4.86	1.23	1.39
G680T	SNV	chr3:49933167	52.35	4.88	28.24	9.23	2.1	3.2
G680A	SNV	chr3:49933166	65.85	5.19	20.01	5.13	1.66	2.17
GA681G	DEL	chr3:49933166	76.39	6.16	10.69	5.8	0.46	0.49
A681T	SNV	chr3:49933166	61.08	4.66	26	3.14	2.92	2.2
A681G	SNV	chr3:49933166	63.44	5.15	23.34	3.91	2.07	2.09
A682T	SNV	chr3:49933165	64.76	5.4	21.78	4.32	1.65	2.09
A682G	SNV	chr3:49933165	62.65	4.6	24.51	4.34	2.21	1.69
G683T	SNV	chr3:49933165	68.44	6.89	16.49	4.98	1.18	2.02
G683C	SNV	chr3:49933164	66.88	5.12	20.41	5.01	1.13	1.45
G683A	SNV	chr3:49933164	62.1	7.41	21.29	5.36	1.75	2.09
C684T	SNV	chr3:49933164	66.88	3.84	22.26	2.92	1.33	2.77
C684G	SNV	chr3:49933163	44.56	5.7	41.82	2.73	3.65	1.53
C684A	SNV	chr3:49933163	61.47	5.56	23.23	6.2	2.03	1.5
A685T	SNV	chr3:49933163	62.12	4.89	22.85	6.89	1.21	2.04
A685G	SNV	chr3:49933163	66.47	5.01	21.1	4.27	1.52	1.64
A685C	SNV	chr3:49933162	44.93	6.51	41.76	3.8	0.85	2.15
G686T	SNV	chr3:49933162	57.66	8.61	23.43	6.97	1.22	2.11
G686C	SNV	chr3:49933162	65.31	7.49	21.13	4.62	0.73	0.72
G686A	SNV	chr3:49933161	59.56	7.47	23.35	5.63	1.55	2.45
C687T	SNV	chr3:49933161	59.79	5.84	25.54	4.71	1.93	2.19
C687G	SNV	chr3:49933160	59.74	5.08	25.95	4.16	3.65	1.42
C687A	SNV	chr3:49933160	66.22	4.68	20.82	4.23	1.96	2.08
T688G	SNV	chr3:49933160	59.04	7.73	23.84	5.56	1.78	2.06
T688C	SNV	chr3:49933159	59.16	6.11	25.05	6.02	1.58	2.08
T688A	SNV	chr3:49933159	58.59	5.61	27.61	5.04	1.6	1.55
A689T	SNV	chr3:49933158	64.61	5.55	21.19	4.09	1.4	3.17
A689G	SNV	chr3:49933158	61.92	8.17	20.72	4.96	1.95	2.28
A689C	SNV	chr3:49933158	60.73	8.24	20.7	5.35	2.64	2.33
G690T	SNV	chr3:49933157	69.8	4.35	19.68	1.27	3.16	1.73
G690C	SNV	chr3:49933157	75.27	3.47	14.07	1.95	2.65	2.59
G690A	SNV	chr3:49933156	47.77	2.33	39.85	1.16	7.82	1.08
G691T	SNV	chr3:49933156	17.48	0.35	66.57	0.54	14.11	0.96
G691A	SNV	chr3:49933155	12.22	0.38	73.21	0.2	13.83	0.16
T692G	SNV	chr3:49933155	6.41	0.19	78.05	0.06	14.8	0.48
T692C	SNV	chr3:49933155	18.96	1.02	69.54	0.28	9.7	0.5
T692A	SNV	chr3:49933154	10.41	0.34	73.51	0.06	15.35	0.34
G693C	SNV	chr3:49933154	50.13	3.73	37.77	2.3	1.83	4.23
G693A	SNV	chr3:49933154	56.78	8.83	23.41	6.88	1.97	2.14
A694T	SNV	chr3:49933153	23.75	1.02	61.74	0.31	12.77	0.42
A694G	SNV	chr3:49933153	41.64	1.05	47.47	0.48	8.3	1.06
G695T	SNV	chr3:49933153	32.21	1.28	45.09	0.42	20.55	0.45
G695A	SNV	chr3:49933152	22.74	1.41	60.26	0.5	14.29	0.8
T696C	SNV	chr3:49933152	61.5	2.62	28.1	1.25	4.8	1.72
T696A	SNV	chr3:49933152	70.26	3.84	20.23	2.31	1.73	1.64
T697G	SNV	chr3:49933151	79.71	2.37	12.29	2.04	2.07	1.53
T697C	SNV	chr3:49933151	62.13	5.2	24.46	3.82	2.37	2.02
T697A	SNV	chr3:49933151	54.96	7.68	27.66	6.74	1.44	1.53
C698T	SNV	chr3:49933150	63.76	6.46	21.06	4.48	2.04	2.19
C698A	SNV	chr3:49933150	61.34	4.35	26.08	5.13	1.38	1.72
T699C	SNV	chr3:49933150	58.36	7.61	24.66	5.89	1.72	1.77
T699A	SNV	chr3:49933149	63.15	3.97	23.62	5.5	2.13	1.63
C700T	SNV	chr3:49933149	57.72	5.36	26.26	5.82	2.17	2.66
C700G	SNV	chr3:49933149	55.73	7.8	26.34	5.73	0.96	3.45
C700A	SNV	chr3:49933148	55.43	6.4	29.37	5.7	0.92	2.18
T701G	SNV	chr3:49933148	69.48	3.36	15.41	7.69	0.81	3.26
T701C	SNV	chr3:49933148	60.37	6.19	25.83	5.17	0.94	1.49
T701A	SNV	chr3:49933147	66.64	4.4	21.32	4.07	1.36	2.21
TG702T	DEL	chr3:49933147	72.37	7.51	12.09	4.52	1.8	1.72
G702T	SNV	chr3:49933146	75.72	6.98	12.24	3.89	0.66	0.51
G702C	SNV	chr3:49933146	57.43	5.91	26.15	5.34	2.1	3.07
G702A	SNV	chr3:49933146	66.26	6.92	20.11	3.24	1.61	1.86
C703T	SNV	chr3:49933145	59.98	6.78	22.16	7.78	1.27	2.03
C703G	SNV	chr3:49933145	46.51	7.39	25.53	15.82	2.56	2.2
C703A	SNV	chr3:49933145	54.33	7.52	25.95	7.05	2.65	2.49
CT704C	DEL	chr3:49933144	68.21	7.67	17.03	2.46	1	3.64
T704G	SNV	chr3:49933144	72.66	6.45	14.95	2.45	1.78	1.71
T704C	SNV	chr3:49933144	61.63	5.8	22.54	6.3	1.63	2.1
T704A	SNV	chr3:49933143	61.7	6.38	23.11	4.7	2	2.12
T704TC	IN	chr3:49933143	52.93	6.8	26.94	5.94	4.22	3.15

## Sheet: HEK293T average frequency
mutation	mutation type	genomic position	AE inclusion (%)	AE skipping (%)	full IR (%)	first IR (%)	second IR (%)	other (%)
WT mean	-	-	62.04	8.26	20.54	4.77	1.87	2.18
WT SD	-	-	2.93	1.04	2.69	0.79	0.42	0.48
A26T	SNV	chr3:49933812	60.82	8.05	22.02	5.47	1.82	1.82
A26G	SNV	chr3:49933812	55.69	7.55	27.68	4.97	2.08	2.02
G27T	SNV	chr3:49933811	63.68	10.4	16.32	3.98	1.89	3.73
G27C	SNV	chr3:49933811	59.86	9.04	23.61	2.72	1.91	2.87
G27A	SNV	chr3:49933811	56.3	7.89	26.28	5.13	2.14	2.27
C28T	SNV	chr3:49933810	62.02	7.27	22.07	4.98	1.68	1.99
C28G	SNV	chr3:49933810	51.21	11.66	26.45	9	0.72	0.95
C28A	SNV	chr3:49933810	57.86	9.62	22.42	5.27	2.39	2.44
T29G	SNV	chr3:49933809	61.97	9.39	19.67	4.64	2.04	2.28
T29C	SNV	chr3:49933809	62.83	8.26	20.98	4.18	1.77	1.98
T29A	SNV	chr3:49933809	57.53	7.83	25.75	4.72	2.06	2.11
G30T	SNV	chr3:49933808	60.19	5.38	24.18	3.73	1.54	4.98
G30A	SNV	chr3:49933808	61.32	8.31	21.64	4.9	1.74	2.1
T31G	SNV	chr3:49933807	61.93	9.43	20.17	4.66	1.53	2.29
T31C	SNV	chr3:49933807	63.2	8.02	20.08	4.53	1.95	2.21
T31A	SNV	chr3:49933807	59.9	7.89	23.38	4.49	2.15	2.19
G32T	SNV	chr3:49933806	57.01	7.93	25.81	4.57	2.41	2.26
G32C	SNV	chr3:49933806	45.9	13.86	31.97	4.66	1.82	1.79
G32A	SNV	chr3:49933806	56.91	9.15	24.47	4.58	2.35	2.54
C33T	SNV	chr3:49933805	64.02	9.11	18.61	4.46	1.71	2.09
C33G	SNV	chr3:49933805	56.78	13.86	20.59	4.58	1.66	2.53
C33A	SNV	chr3:49933805	70.67	7.42	14.47	3.58	1.98	1.87
C34T	SNV	chr3:49933804	54.58	8.02	28.62	4.59	1.92	2.28
C34A	SNV	chr3:49933804	61.85	6.26	22.74	4.95	1.67	2.53
G35T	SNV	chr3:49933803	56.59	6.74	25.83	5.91	2.41	2.53
G35A	SNV	chr3:49933803	62.12	7.32	21.71	4.88	1.94	2.04
C36T	SNV	chr3:49933802	66.82	7.05	17.15	4.62	1.87	2.49
C36G	SNV	chr3:49933802	56.48	8.99	22.97	6.12	2.51	2.94
C36A	SNV	chr3:49933802	66.53	8.19	15.55	4.85	2.74	2.14
C37T	SNV	chr3:49933801	61.5	8.63	21.38	4.51	1.74	2.25
C37A	SNV	chr3:49933801	59.63	7.2	24.5	5.22	1.24	2.21
CT38C	DEL	chr3:49933801	60.87	7.61	22.12	5.84	1.62	1.95
T38G	SNV	chr3:49933800	59.92	10.31	21.18	3.92	1.85	2.82
T38C	SNV	chr3:49933800	60.08	8.3	23.02	4.93	1.7	1.98
T38A	SNV	chr3:49933800	64.59	8.26	18.63	4.38	2.04	2.11
T39C	SNV	chr3:49933799	60.61	8.43	22.29	5.11	1.59	1.98
T39A	SNV	chr3:49933799	57.5	11.07	21.98	5.28	1.89	2.29
TC40T	DEL	chr3:49933799	55.98	9.11	24.2	6.31	2.42	1.98
C40T	SNV	chr3:49933798	50.26	9.93	29.5	6	2.05	2.26
C40A	SNV	chr3:49933798	39.35	20.07	31.55	4.93	1.58	2.51
C41T	SNV	chr3:49933797	60.96	8.9	20.92	5.04	1.68	2.5
C41G	SNV	chr3:49933797	62.6	9.08	21.19	3.32	1.79	2.03
C41A	SNV	chr3:49933797	61.23	7.75	21.64	5.05	2.05	2.29
T42G	SNV	chr3:49933796	61.48	8.48	21.32	3.96	2.42	2.34
T42C	SNV	chr3:49933796	62.86	7.39	21.18	4.26	1.67	2.64
T42A	SNV	chr3:49933796	64.57	6.66	19.91	5.31	1.24	2.3
G43T	SNV	chr3:49933795	53.85	6.27	32.53	3.41	1.89	2.05
G43C	SNV	chr3:49933795	57.96	8.66	24.1	5.65	1.41	2.21
G43A	SNV	chr3:49933795	59.29	8.58	22.18	6.36	1.98	1.61
A44T	SNV	chr3:49933794	55.38	7.44	26.59	6.67	1.91	2.02
A44G	SNV	chr3:49933794	58.82	8.81	22.95	5.13	2.24	2.06
A44C	SNV	chr3:49933794	47.68	12.26	27.23	7.62	2.87	2.33
A45T	SNV	chr3:49933793	62.01	6.89	21.55	5.38	2	2.17
A45G	SNV	chr3:49933793	62.35	7.07	22.24	4.66	1.76	1.92
T46G	SNV	chr3:49933792	64.81	10.68	16.57	3.48	1.86	2.6
T46C	SNV	chr3:49933792	61.41	9.64	21.36	3.84	1.91	1.84
T46A	SNV	chr3:49933792	62.08	7.84	20.54	5.06	1.97	2.5
A47T	SNV	chr3:49933791	58.18	11.11	21.23	5.62	1.86	2
A47G	SNV	chr3:49933791	59.79	10.16	20.59	5.54	1.97	1.95
T48G	SNV	chr3:49933790	73.98	1.09	13.85	8.3	2.27	0.51
T48C	SNV	chr3:49933790	60.51	10.61	19.86	4.93	1.96	2.13
T48A	SNV	chr3:49933790	55.74	8.28	25.95	5.33	2.19	2.51
G49C	SNV	chr3:49933789	73.3	5.32	12.99	3.54	1.7	3.15
G49A	SNV	chr3:49933789	68.49	7.93	16.66	3.56	1.41	1.94
T50G	SNV	chr3:49933788	61.04	5.52	22.04	6.26	2.64	2.5
T50C	SNV	chr3:49933788	62.04	8.71	20.04	4.99	1.99	2.23
T50A	SNV	chr3:49933788	65.88	7.99	17.67	5.11	1.52	1.82
TG51T	DEL	chr3:49933788	55.6	7.47	27.16	5.26	2.4	2.12
G51T	SNV	chr3:49933787	60.99	5.71	23.7	5.01	2.19	2.39
G51A	SNV	chr3:49933787	63.5	6.52	21.74	4.29	1.7	2.26
G52T	SNV	chr3:49933786	64.25	6.7	20.53	4.41	1.89	2.21
G52C	SNV	chr3:49933786	61.46	7.91	21.3	4.95	2.24	2.14
G52A	SNV	chr3:49933786	61.51	10.97	18.31	4.75	1.7	2.75
T53G	SNV	chr3:49933785	56.96	6.87	26.08	6.93	1.28	1.88
T53C	SNV	chr3:49933785	60.77	8.8	21.68	4.86	1.66	2.23
T53A	SNV	chr3:49933785	66.07	8.31	16.56	4.43	2.3	2.33
C54T	SNV	chr3:49933784	62.5	7.54	20.66	5.09	2.27	1.93
C54G	SNV	chr3:49933784	52.75	14.35	21.92	4.57	1.48	4.92
C54A	SNV	chr3:49933784	60.42	5.44	24.11	7	1.75	1.29
C55T	SNV	chr3:49933783	60.36	8.03	22.16	5.55	1.93	1.96
C55G	SNV	chr3:49933783	65.62	6.08	16.76	7.58	2.77	1.19
C55A	SNV	chr3:49933783	58.24	7.04	24.69	6.01	2.12	1.89
G56T	SNV	chr3:49933782	55.88	13.87	20.94	5.4	0.94	2.97
G56C	SNV	chr3:49933782	57.46	7.44	21.66	7.82	3.25	2.37
G56A	SNV	chr3:49933782	60.98	8.39	22.34	4.25	1.94	2.09
GA57G	DEL	chr3:49933782	65.67	10.99	14.5	4.94	1.62	2.29
A57T	SNV	chr3:49933781	65.28	7.41	17.66	6.07	1.64	1.94
A57G	SNV	chr3:49933781	64.62	5.4	20.43	5.58	1.79	2.17
G58T	SNV	chr3:49933780	55.98	11.76	21.93	6.24	1.71	2.38
G58A	SNV	chr3:49933780	56.87	10.39	23.36	5.36	1.94	2.08
A59T	SNV	chr3:49933779	57.67	9.58	25.93	3.35	1.27	2.19
A59G	SNV	chr3:49933779	61.27	8.53	21.32	3.85	2.39	2.64
AC60A	DEL	chr3:49933779	54.48	10.49	25.21	5.68	2.05	2.09
C60T	SNV	chr3:49933778	68.92	5.9	17.82	3.08	2.27	2.01
C60A	SNV	chr3:49933778	55.15	9.54	26.33	4.9	1.75	2.33
C61T	SNV	chr3:49933777	62.21	8.44	19.52	4.61	2.19	3.04
C61G	SNV	chr3:49933777	76.83	2.22	12.24	4.21	3.49	1
C61A	SNV	chr3:49933777	61.98	10.5	17.42	4.9	2.86	2.34
C62T	SNV	chr3:49933776	65.9	9.58	16.22	4	1.94	2.36
C62A	SNV	chr3:49933776	62.05	7.99	21.48	4.27	1.84	2.38
C63T	SNV	chr3:49933775	62.09	8.84	20.86	4.67	1.69	1.84
C63G	SNV	chr3:49933775	54.87	11.97	15.64	8.61	5.83	3.08
C63CT	IN	chr3:49933775	60.41	6.75	22.86	5.81	1.84	2.32
C64T	SNV	chr3:49933774	62.77	8.73	19.3	5.65	1.72	1.83
C64A	SNV	chr3:49933774	60.19	6.51	23.88	5.07	1.58	2.77
C64CA	IN	chr3:49933774	61.44	11.55	17.55	5.2	1.69	2.57
CA65C	DEL	chr3:49933774	58.78	9.65	20.71	5.48	1.88	3.51
A65T	SNV	chr3:49933773	62.51	8.98	19.95	4.35	1.76	2.45
A65G	SNV	chr3:49933773	63.48	7.12	20.1	5.44	2.02	1.85
A65C	SNV	chr3:49933773	62.1	7.33	22.12	4.73	1.92	1.8
AG66A	DEL	chr3:49933773	58.35	7.57	22.14	5.9	3.01	3.03
G66T	SNV	chr3:49933772	64.68	9.77	17.99	4.04	1.88	1.64
G66A	SNV	chr3:49933772	62.81	9.92	18.55	4.33	2.04	2.36
G67T	SNV	chr3:49933771	66.47	9.15	15.77	3.96	2.25	2.4
G67C	SNV	chr3:49933771	60.22	18.9	12.71	3.13	2.41	2.61
G67A	SNV	chr3:49933771	67.36	9.01	15.82	3.32	2.28	2.21
G68C	SNV	chr3:49933770	40.68	29.12	20.45	2.19	1.97	5.6
G68A	SNV	chr3:49933770	68.01	7.67	14.75	4.04	2.02	3.51
A69T	SNV	chr3:49933769	63.76	5.88	20.71	5.67	2	1.98
A69G	SNV	chr3:49933769	60.61	6.89	24.58	4.47	1.67	1.78
A69C	SNV	chr3:49933769	69.9	4.96	15.66	5.05	3.22	1.21
A69AT	IN	chr3:49933769	60.97	7.98	19.56	7.42	2.25	1.82
T70G	SNV	chr3:49933768	71.52	5.42	16.74	2.09	2.47	1.76
T70C	SNV	chr3:49933768	64.04	7.74	19.61	4.49	1.97	2.15
T70A	SNV	chr3:49933768	64.14	5.64	21.74	5.45	1.6	1.43
TG71T	DEL	chr3:49933768	66.35	6.83	18.62	4.05	1.9	2.26
G71C	SNV	chr3:49933767	77.41	8.3	10.19	2.15	0.96	1
G71A	SNV	chr3:49933767	61.43	8.1	21.45	5.07	1.91	2.04
G72T	SNV	chr3:49933766	61.84	9.36	19.65	3.91	2.63	2.62
G72C	SNV	chr3:49933766	66.88	7.83	17.32	3.41	2.15	2.41
G72A	SNV	chr3:49933766	62.61	8.85	20.3	3.67	2.07	2.5
G73T	SNV	chr3:49933765	68.67	8.93	14.47	4.08	1.48	2.37
G73C	SNV	chr3:49933765	73.86	5.06	13.51	4.34	2.24	0.99
G73A	SNV	chr3:49933765	68.07	9.63	14.19	3.47	2.22	2.43
T74G	SNV	chr3:49933764	50.48	16.8	18.4	10.07	1.06	3.19
T74C	SNV	chr3:49933764	63.32	9.01	19.27	3.74	2.38	2.28
T74A	SNV	chr3:49933764	62.06	7.74	22.38	3.81	1.76	2.25
T74TG	IN	chr3:49933764	61.7	10.11	19.04	5.84	1.74	1.58
G75T	SNV	chr3:49933763	64.14	7.16	19.4	5.1	1.87	2.32
G75A	SNV	chr3:49933763	63.97	8.48	19.05	4.22	1.83	2.45
G76T	SNV	chr3:49933762	62.18	8.71	20.18	3.78	2.48	2.67
G76C	SNV	chr3:49933762	64.39	8.43	18.27	3.73	2.33	2.85
G76A	SNV	chr3:49933762	63.8	9.15	18.44	4.24	1.91	2.46
C77T	SNV	chr3:49933761	60.78	6.78	22.85	5.34	2.18	2.07
C77G	SNV	chr3:49933761	52.66	4.28	29.71	7.46	3.69	2.2
C77A	SNV	chr3:49933761	65.15	6.65	20.86	4.15	1.46	1.73
CA78C	DEL	chr3:49933761	60.51	9.02	21.09	5.96	1.8	1.61
A78T	SNV	chr3:49933760	63.64	7.63	20.53	4.53	1.77	1.89
A78G	SNV	chr3:49933760	62.06	7.98	21.11	4.98	1.76	2.11
A78C	SNV	chr3:49933760	56.48	13.48	20	4.85	2.6	2.6
AG79A	DEL	chr3:49933760	67.42	7.31	16.79	3.58	2.22	2.68
G79T	SNV	chr3:49933759	64.67	9.89	17.18	3.74	2.19	2.33
G79C	SNV	chr3:49933759	56.42	9.05	25.77	4.83	1.76	2.17
G79A	SNV	chr3:49933759	65.46	9.16	17.87	3.28	1.88	2.35
G80T	SNV	chr3:49933758	67.96	9.14	14.74	3.55	2.39	2.23
G80C	SNV	chr3:49933758	62.26	12.23	17.4	3.69	2	2.41
G80A	SNV	chr3:49933758	68.15	8.35	16.25	3.16	1.81	2.27
G81T	SNV	chr3:49933757	61.14	8.68	22.46	4.88	1.54	1.31
G81A	SNV	chr3:49933757	66.79	8.96	16.08	3.82	2.05	2.3
A82T	SNV	chr3:49933756	62.46	8	20.75	4.67	1.96	2.15
A82G	SNV	chr3:49933756	62.07	9.06	19.77	4.46	2.23	2.42
A82C	SNV	chr3:49933756	62.29	8.51	20.2	4.64	2.23	2.12
A83T	SNV	chr3:49933755	61.47	8.73	20.14	5.43	1.79	2.43
A83G	SNV	chr3:49933755	60.79	8.8	21.47	5.07	1.74	2.13
T84G	SNV	chr3:49933754	68.89	6.08	13.82	2.92	2.86	5.43
T84C	SNV	chr3:49933754	63.04	8	19.71	4.75	1.97	2.53
T84A	SNV	chr3:49933754	63.11	8.33	20.94	3.4	2.2	2.02
C85T	SNV	chr3:49933753	57.3	10.53	24.45	4.27	2.07	1.39
C85A	SNV	chr3:49933753	58.4	8.52	23.66	5.58	1.99	1.83
T86G	SNV	chr3:49933752	51.8	10.92	23.33	8.98	2.96	2.01
T86C	SNV	chr3:49933752	57.7	10.49	22.46	5.03	2.11	2.21
T86A	SNV	chr3:49933752	54.43	10.41	25.35	6.26	1.74	1.82
G87T	SNV	chr3:49933751	51.95	11.37	26.58	6.2	2.18	1.72
G87A	SNV	chr3:49933751	61.45	8.07	21.36	5	1.88	2.24
A88T	SNV	chr3:49933750	55.69	10.18	23.96	6.22	1.85	2.11
A88G	SNV	chr3:49933750	57.65	9.02	22.82	6.35	1.92	2.23
A88C	SNV	chr3:49933750	62.62	19.21	8.49	7.21	0.92	1.54
G89T	SNV	chr3:49933749	61.55	10.76	19.34	5.04	1.28	2.02
G89A	SNV	chr3:49933749	63.61	6.84	21.83	3.97	2.01	1.75
T90G	SNV	chr3:49933748	54.92	8.69	25.91	6.35	2.12	2.02
T90C	SNV	chr3:49933748	64.62	9.16	17.49	4.4	1.95	2.37
T90A	SNV	chr3:49933748	63.7	8.72	18.74	4.8	1.65	2.38
G91T	SNV	chr3:49933747	62.79	11.46	13.4	4.11	4.24	4.01
G91C	SNV	chr3:49933747	63.51	8.88	18.08	6.52	1.66	1.36
G91A	SNV	chr3:49933747	59.65	8.3	22.81	4.94	1.8	2.5
GC92G	DEL	chr3:49933747	63.09	9.88	18.47	4.03	2.41	2.11
C92T	SNV	chr3:49933746	60.52	8.58	22.15	4.71	2.06	1.98
C92A	SNV	chr3:49933746	67.77	8.79	16.82	3.02	1.83	1.77
C93T	SNV	chr3:49933745	59.65	9.03	22.18	5.28	1.97	1.9
C93A	SNV	chr3:49933745	56.58	9.25	24.4	6.35	0.76	2.66
C94T	SNV	chr3:49933744	61.78	8.9	20	5.51	1.91	1.89
C94G	SNV	chr3:49933744	61.06	9.78	19.9	4.7	2.92	1.64
C94A	SNV	chr3:49933744	67	6.46	16.77	5.8	1.8	2.17
G95T	SNV	chr3:49933743	62.36	7.32	21.47	4.71	1.35	2.79
G95C	SNV	chr3:49933743	71.54	9.21	13.74	1.49	1.7	2.32
G95A	SNV	chr3:49933743	59.17	7.53	23.99	4.78	2	2.53
G95GA	IN	chr3:49933743	63.49	7.07	21.03	4.87	1.53	2.02
GA96G	DEL	chr3:49933743	53.6	10.84	24.23	6.89	2.11	2.33
A96T	SNV	chr3:49933742	59.04	8.93	23.54	4.65	1.72	2.12
A96G	SNV	chr3:49933742	59.91	8.12	22.44	5.71	1.65	2.17
A96C	SNV	chr3:49933742	62.83	7.25	21.05	4.06	2.11	2.68
AG97A	DEL	chr3:49933742	63.47	8.3	18.12	5.14	2.44	2.52
G97T	SNV	chr3:49933741	64.91	8.9	17.42	3.9	2.17	2.69
G97C	SNV	chr3:49933741	61.92	11.23	18.22	3.85	1.98	2.81
G97A	SNV	chr3:49933741	64.17	7.74	19.26	4.79	1.88	2.15
G98T	SNV	chr3:49933740	65.97	9.64	16.28	3.44	1.73	2.93
G98C	SNV	chr3:49933740	79.28	5.15	8.05	4.68	0.96	1.89
G98A	SNV	chr3:49933740	64.45	8.72	18.41	4.06	1.59	2.77
G99T	SNV	chr3:49933739	63.75	8.1	18.25	5.02	2.05	2.82
G99C	SNV	chr3:49933739	63.62	7.88	18.77	5.12	1.5	3.12
G99A	SNV	chr3:49933739	67.04	9.04	15.73	3.94	2.32	1.93
G100T	SNV	chr3:49933738	60.6	7.56	22.5	5.72	1.84	1.78
G100C	SNV	chr3:49933738	59.31	9.39	21.86	4.66	1.91	2.87
G100A	SNV	chr3:49933738	66.1	7.89	17.79	3.99	1.64	2.58
A101T	SNV	chr3:49933737	63.6	9.32	18.26	5.18	1.64	2.01
A101G	SNV	chr3:49933737	62.53	8.29	20.88	4.65	1.71	1.94
T102C	SNV	chr3:49933736	61.7	8.31	21.3	5.2	1.7	1.8
T102A	SNV	chr3:49933736	60.04	8.49	21.52	6.61	1.57	1.76
TG103T	DEL	chr3:49933736	70.72	5.88	14.62	4.82	2.04	1.93
G103T	SNV	chr3:49933735	55.25	8.38	28.25	3.49	2.63	2
G103A	SNV	chr3:49933735	59.92	5.67	25.76	5.31	1.7	1.65
G104A	SNV	chr3:49933734	62.57	8.07	20.75	4.96	1.64	2.02
GA105G	DEL	chr3:49933734	62.04	7.07	21.31	6.66	1.81	1.11
A105T	SNV	chr3:49933733	62.41	7.81	20.94	4.66	1.92	2.27
A105G	SNV	chr3:49933733	61.34	7.14	22.47	5.35	1.69	2
A105C	SNV	chr3:49933733	55.53	7.9	27.04	4.54	2.07	2.94
G106T	SNV	chr3:49933732	65.56	9.46	16.94	4.81	1.66	1.56
G106C	SNV	chr3:49933732	64.55	11.55	14.21	6.11	1.22	2.36
G106A	SNV	chr3:49933732	62.25	8.09	21.49	4.51	1.76	1.91
C107T	SNV	chr3:49933731	60.16	8.81	23.09	3.87	2.08	1.99
C107G	SNV	chr3:49933731	65.4	6.82	18.32	6.28	1.44	1.72
C107A	SNV	chr3:49933731	61.32	8.81	19.78	5.62	2.18	2.29
T108G	SNV	chr3:49933730	65.29	7.23	19.55	3.92	1.84	2.17
T108C	SNV	chr3:49933730	65.47	7.05	19.05	4.74	1.78	1.91
T108A	SNV	chr3:49933730	62.18	8.32	20.99	4.8	1.81	1.91
G109T	SNV	chr3:49933729	55.58	9.52	26.76	4.11	1.84	2.19
G109C	SNV	chr3:49933729	63.72	8.78	18.65	4.6	1.75	2.5
G109A	SNV	chr3:49933729	61.86	8.67	20.47	5.1	1.73	2.17
C110T	SNV	chr3:49933728	67.11	5.5	19.13	4.37	1.42	2.47
C110A	SNV	chr3:49933728	62.38	6.3	22.44	4.55	2.38	1.95
T111G	SNV	chr3:49933727	64.1	9.37	18.14	4.84	1.46	2.08
T111C	SNV	chr3:49933727	63.76	7.56	20.9	4.12	1.7	1.96
T111A	SNV	chr3:49933727	63.96	7.64	20.15	4.56	1.93	1.75
TG112T	DEL	chr3:49933727	62.62	9.17	18.13	6.07	1.65	2.35
G112T	SNV	chr3:49933726	61.57	7.84	21.51	4.19	2.22	2.67
G112C	SNV	chr3:49933726	71.26	7.23	12.65	4.71	1.19	2.95
G112A	SNV	chr3:49933726	63.49	9.37	18.41	5.48	1.42	1.82
G113T	SNV	chr3:49933725	62.07	10.97	18.63	4.95	1.81	1.57
G113C	SNV	chr3:49933725	67.39	10	14.78	3.75	1.88	2.2
G113A	SNV	chr3:49933725	65.75	8.46	17.14	4.58	1.94	2.13
C114T	SNV	chr3:49933724	65.75	7.91	18.29	3.68	1.76	2.6
C114G	SNV	chr3:49933724	64.54	8.95	17.37	4.93	2.21	2
C114A	SNV	chr3:49933724	68.78	9.17	13.43	3.31	2.82	2.49
CT115C	DEL	chr3:49933724	65.44	6.94	19.92	3.75	1.95	1.99
T115G	SNV	chr3:49933723	59.83	14.13	21.09	1.53	1.54	1.87
T115C	SNV	chr3:49933723	68.09	7.41	15.98	4.75	1.55	2.22
T115A	SNV	chr3:49933723	63.59	7.85	19.7	4.59	2.08	2.18
T116C	SNV	chr3:49933722	64.32	6.93	19.47	5.13	2.11	2.03
T116A	SNV	chr3:49933722	65.45	7.48	18.38	4.36	2.19	2.12
T117C	SNV	chr3:49933721	64.74	9.29	17.07	4.37	2.08	2.45
T117A	SNV	chr3:49933721	58.88	10.32	21.82	4.64	1.67	2.68
TA118T	DEL	chr3:49933721	68.36	5.86	18.09	4.81	1.6	1.28
A118T	SNV	chr3:49933720	60.6	8.38	20.09	6.45	2.16	2.32
A118G	SNV	chr3:49933720	66.24	7.46	17.7	4.38	2.07	2.15
A118C	SNV	chr3:49933720	60.75	8.94	19.67	6.29	2.22	2.14
C119T	SNV	chr3:49933719	61.08	7.75	22.15	4.77	2.01	2.24
C119G	SNV	chr3:49933719	61.57	11.03	19	5.05	1.17	2.18
C119A	SNV	chr3:49933719	56.62	5.18	25.13	5.8	5.28	1.99
A120T	SNV	chr3:49933718	60.78	7.56	22.45	4.83	1.93	2.46
A120G	SNV	chr3:49933718	61.6	7.48	21.46	5.36	1.82	2.28
A120C	SNV	chr3:49933718	68.76	7.24	15.85	5.56	1.05	1.55
C121T	SNV	chr3:49933717	60.61	7.88	22.72	4.85	2.02	1.92
C121G	SNV	chr3:49933717	60.14	9.25	19.9	6.26	2.14	2.31
C121A	SNV	chr3:49933717	58.09	7.79	23.87	5.91	2.42	1.91
T122G	SNV	chr3:49933716	68.27	6.38	16.04	6.19	1.56	1.56
T122C	SNV	chr3:49933716	63.81	9.63	17.98	4.32	1.79	2.47
T122A	SNV	chr3:49933716	62.88	8.48	20.27	4.21	1.92	2.24
G123T	SNV	chr3:49933715	65.83	7.91	18.08	4.08	1.59	2.5
G123C	SNV	chr3:49933715	64.77	5.65	19.51	5.18	2.66	2.22
G123A	SNV	chr3:49933715	61.94	6.7	22.15	4.72	2.46	2.03
C124T	SNV	chr3:49933714	66.37	6.6	17.43	5.64	1.84	2.12
C124G	SNV	chr3:49933714	55.75	8.73	24.43	5.42	1.59	4.09
C124A	SNV	chr3:49933714	63.36	7.9	20.65	3.96	2.37	1.75
C125T	SNV	chr3:49933713	60.05	9.19	21.04	5.59	1.96	2.16
C125A	SNV	chr3:49933713	63.76	7.35	19.89	4.81	1.79	2.4
T126G	SNV	chr3:49933712	63.2	7.13	18.1	5.11	3.9	2.57
T126C	SNV	chr3:49933712	60.65	9.1	21.31	4.76	1.95	2.23
T126A	SNV	chr3:49933712	57.43	7.53	24.24	7.15	1.57	2.08
G127T	SNV	chr3:49933711	56.25	8.56	24.6	5.53	2.83	2.23
G127A	SNV	chr3:49933711	68.18	6.27	16.37	5.26	1.92	2
G128T	SNV	chr3:49933710	66.07	4.87	19.64	4.22	2.58	2.62
G128C	SNV	chr3:49933710	65.81	9.02	17.49	3.69	1.79	2.19
G128A	SNV	chr3:49933710	66.79	7.01	17.97	4.07	1.81	2.35
C129T	SNV	chr3:49933709	64.63	7.24	19.05	4.98	1.97	2.12
C129G	SNV	chr3:49933709	60.81	12.28	17.04	7.13	0.8	1.94
C129A	SNV	chr3:49933709	61.77	10.6	18.7	5.1	1.91	1.91
CT130C	DEL	chr3:49933709	75.99	4.71	12.2	4.28	1.58	1.23
T130G	SNV	chr3:49933708	63.22	9.82	19	4.29	1.79	1.88
T130C	SNV	chr3:49933708	63.32	10.98	17.49	4.08	1.83	2.3
T130A	SNV	chr3:49933708	59.79	7.69	23.06	5.13	1.76	2.56
T131G	SNV	chr3:49933707	57.38	7.13	22.76	8.22	2.57	1.94
T131C	SNV	chr3:49933707	59.12	8.48	23.31	4.91	2.11	2.07
T131A	SNV	chr3:49933707	59.88	10.11	20.67	5.24	2.18	1.93
T132G	SNV	chr3:49933706	62.38	7.99	19.06	6.26	1.06	3.25
T132C	SNV	chr3:49933706	63.96	7.57	19.85	4.67	1.87	2.07
T132A	SNV	chr3:49933706	60.16	6.61	21.96	6.48	2.91	1.88
TC133T	DEL	chr3:49933706	63.71	5.71	20.19	6.35	1.77	2.28
C133T	SNV	chr3:49933705	60.94	8.62	22.29	4.69	1.77	1.68
C133G	SNV	chr3:49933705	66.04	14.63	14.64	2.75	1.15	0.79
C133A	SNV	chr3:49933705	65.4	10.43	15.76	5.1	0.95	2.35
G134T	SNV	chr3:49933704	70.18	6.24	16.56	3.94	1.56	1.51
G134C	SNV	chr3:49933704	65.71	7.36	19.51	4.01	1.45	1.96
G134A	SNV	chr3:49933704	60.68	8.2	21.97	5.03	1.91	2.21
C135T	SNV	chr3:49933703	57.18	9.71	23.16	5.54	1.84	2.57
C135A	SNV	chr3:49933703	76.57	3.6	12.1	5.07	1.4	1.25
T136C	SNV	chr3:49933702	63.09	8.61	18.52	5.45	1.87	2.47
T136A	SNV	chr3:49933702	59.29	8.22	23.23	5.23	1.89	2.12
T137G	SNV	chr3:49933701	64.34	8.63	17.21	4.78	2.31	2.73
T137C	SNV	chr3:49933701	62.59	7.55	20.97	4.94	1.71	2.23
T137A	SNV	chr3:49933701	62.42	8.31	19.5	5.58	1.9	2.29
TC138T	DEL	chr3:49933701	63.2	8.2	20.23	4.14	2.05	2.18
C138T	SNV	chr3:49933700	57.78	8.45	24.3	4.92	1.89	2.66
C139T	SNV	chr3:49933699	59.55	8.13	22.92	5.44	1.75	2.21
C139A	SNV	chr3:49933699	60.68	8.69	21.33	4.93	2.04	2.33
T140G	SNV	chr3:49933698	47.04	16.97	21.73	6.51	2.09	5.67
T140C	SNV	chr3:49933698	60.88	8.65	21.66	4.74	1.81	2.26
T140A	SNV	chr3:49933698	61.6	8.87	20.52	4.79	1.98	2.25
A141T	SNV	chr3:49933697	62.24	7.31	21.22	5.1	1.83	2.29
A141G	SNV	chr3:49933697	65.32	8.55	18.28	4.4	1.47	1.98
A141C	SNV	chr3:49933697	62.31	9.68	19.82	4.19	1.47	2.53
A141AC	IN	chr3:49933697	63.41	7.29	20.81	4.99	1.61	1.88
AC142A	DEL	chr3:49933697	65.61	7.62	19.03	3.9	1.67	2.17
C142T	SNV	chr3:49933696	61.84	7.99	20.76	4.96	2.09	2.36
C142G	SNV	chr3:49933696	62.5	8.84	19.3	4.72	1.73	2.9
C142A	SNV	chr3:49933696	55.99	12.89	20.42	6.64	2.1	1.96
C143T	SNV	chr3:49933695	59.14	9.22	23.73	3.72	1.99	2.2
C143G	SNV	chr3:49933695	59.59	9.11	22.02	4.68	2.11	2.49
C143A	SNV	chr3:49933695	65.47	9.26	17.2	3.65	2.18	2.25
C144T	SNV	chr3:49933694	64.19	9.56	17.98	3.87	1.52	2.88
C144G	SNV	chr3:49933694	65.11	10.67	14.09	4.19	3.63	2.31
C144A	SNV	chr3:49933694	69.31	8.23	13.57	4.23	2.37	2.3
C145T	SNV	chr3:49933693	64.22	8.03	19.76	3.75	2	2.23
C145G	SNV	chr3:49933693	63.46	8.59	19.79	3.93	1.93	2.31
C145A	SNV	chr3:49933693	58.56	9.13	23.47	4.36	2.17	2.31
C146T	SNV	chr3:49933692	63.87	7.64	20.29	4.39	1.73	2.08
C146A	SNV	chr3:49933692	64.02	6.45	17.96	5.56	1.61	4.4
CA147C	DEL	chr3:49933692	48.17	13.58	30.85	3.66	0.82	2.92
A147T	SNV	chr3:49933691	62.85	7.38	20.01	5.63	1.83	2.3
A147G	SNV	chr3:49933691	63.22	8.09	19.93	4.82	1.74	2.21
A147C	SNV	chr3:49933691	62.66	8.55	19.39	5.06	2.04	2.29
A147AC	IN	chr3:49933691	65.66	6.04	19.27	5.67	1.75	1.62
AC148A	DEL	chr3:49933691	65.13	8.24	18.13	4.57	1.81	2.12
C148T	SNV	chr3:49933690	65.23	8.46	18.1	4.29	1.74	2.19
C148G	SNV	chr3:49933690	63.78	8.04	20.98	3.42	1.39	2.39
C148A	SNV	chr3:49933690	48.37	9.26	33.94	2.52	1.24	4.66
C149T	SNV	chr3:49933689	65.97	8.14	17.52	4.54	1.62	2.21
C149G	SNV	chr3:49933689	61.85	8.54	19.12	6.07	1.86	2.56
C149A	SNV	chr3:49933689	59.92	9.29	21.34	5.13	2.25	2.07
C150T	SNV	chr3:49933688	60.57	10.93	19.63	4.44	2.01	2.42
C150A	SNV	chr3:49933688	63.21	9.29	19.13	4.07	1.98	2.32
C151T	SNV	chr3:49933687	57.73	10.22	22.22	5.57	1.87	2.39
C151CT	IN	chr3:49933687	58.19	6.78	23.89	7.89	1.49	1.76
A152T	SNV	chr3:49933686	63.74	8.82	19.77	3.92	1.54	2.21
A152G	SNV	chr3:49933686	61.19	9.46	20.44	4.67	1.91	2.34
A152C	SNV	chr3:49933686	66.81	8.37	15.22	5.92	1.39	2.3
AT153A	DEL	chr3:49933686	71.09	6.15	14.7	4.07	1.9	2.09
T153C	SNV	chr3:49933685	60.98	8.91	21.89	4.24	2.01	1.96
T153A	SNV	chr3:49933685	63.94	9.95	18.38	3.83	1.76	2.15
C154T	SNV	chr3:49933684	61.74	7.06	22.37	4.64	1.68	2.5
C154G	SNV	chr3:49933684	56.21	10.95	23.44	5.02	2.45	1.93
C154A	SNV	chr3:49933684	61.67	6.98	23.59	4.25	1.73	1.78
C155T	SNV	chr3:49933683	61.74	7.53	21.53	5.28	2.08	1.84
C155G	SNV	chr3:49933683	65.82	7.61	18.18	4.15	1.99	2.25
C155A	SNV	chr3:49933683	60.64	10.12	20.26	4.41	1.88	2.7
CA156C	DEL	chr3:49933683	66.35	5.71	18.46	5.03	2.05	2.41
A156T	SNV	chr3:49933682	62.26	7.18	21.36	5.27	1.87	2.06
A156G	SNV	chr3:49933682	60.29	9.03	21.36	4.8	1.88	2.63
A156C	SNV	chr3:49933682	66.54	7.43	17.21	4.61	1.76	2.46
AC157A	DEL	chr3:49933682	63.89	7.62	20.01	4.45	1.96	2.07
C157T	SNV	chr3:49933681	66.12	7.73	17.75	4.35	1.9	2.14
C157G	SNV	chr3:49933681	62.3	7.56	21.1	4.42	2.61	2.02
C157A	SNV	chr3:49933681	51.31	8.93	24.86	8.55	3.34	3.01
C158T	SNV	chr3:49933680	62.83	7.98	20.2	4.9	2.03	2.06
C158G	SNV	chr3:49933680	59.32	8.31	23.63	4.83	1.99	1.92
C158A	SNV	chr3:49933680	58.23	9.62	22.18	5.07	2.01	2.89
C159T	SNV	chr3:49933679	60.73	7.22	23.22	4.61	2.11	2.12
C159G	SNV	chr3:49933679	61.6	7.48	20.8	3.4	4.15	2.57
C159A	SNV	chr3:49933679	75.92	3.93	13.16	3.65	2.06	1.29
CA160C	DEL	chr3:49933679	67.79	7.14	17.44	4.15	1.95	1.54
A160T	SNV	chr3:49933678	64.03	8.95	18.42	4.1	1.96	2.54
A160G	SNV	chr3:49933678	64.6	10.92	16.39	3.47	2.14	2.48
A160C	SNV	chr3:49933678	63.53	6.82	21.16	4.77	1.95	1.78
G161T	SNV	chr3:49933677	62.43	7.74	21.02	3.59	1.87	3.35
G161C	SNV	chr3:49933677	60.78	7.33	20.53	6.88	1.9	2.58
G161A	SNV	chr3:49933677	61.59	8.18	20.6	5.31	2.07	2.25
T162G	SNV	chr3:49933676	65.23	6.69	20.05	3.77	2.09	2.17
T162C	SNV	chr3:49933676	65	7.87	18.17	4.73	2.07	2.17
T162A	SNV	chr3:49933676	63.09	8.28	19.54	5.22	1.95	1.92
G163T	SNV	chr3:49933675	60.79	6.31	24.15	5.61	1.81	1.32
G163C	SNV	chr3:49933675	55.95	10.09	24.92	4.61	2.5	1.92
G163A	SNV	chr3:49933675	63.47	7.76	20.13	4.85	1.75	2.04
C164T	SNV	chr3:49933674	62.74	8.82	20.27	4.47	1.68	2.02
C164G	SNV	chr3:49933674	68.14	3.19	17.75	4.64	3.93	2.34
C164A	SNV	chr3:49933674	64.1	10.03	17.75	3.49	2.15	2.48
C165T	SNV	chr3:49933673	58.87	7.83	24.18	5.29	1.88	1.94
C165G	SNV	chr3:49933673	65.77	4.43	21.21	2.19	4.07	2.33
C165A	SNV	chr3:49933673	69.49	9.7	12.88	4.24	1.13	2.56
CA166C	DEL	chr3:49933673	64.35	12.56	14.37	5.75	0.66	2.32
A166T	SNV	chr3:49933672	63.93	8.6	19.51	3.82	2.02	2.12
A166G	SNV	chr3:49933672	64.34	8.55	18.44	4.46	1.79	2.42
A166C	SNV	chr3:49933672	56.59	13.35	20.41	5.31	1.99	2.35
A167T	SNV	chr3:49933671	61.46	9.45	20.3	4.91	1.85	2.03
A167G	SNV	chr3:49933671	58.08	7.91	24.53	5.48	1.9	2.1
AC168A	DEL	chr3:49933671	53.86	10.45	25.54	6.18	2.54	1.44
C168T	SNV	chr3:49933670	63.2	7.23	20.54	5.4	1.69	1.94
C168G	SNV	chr3:49933670	59.66	8.36	20.38	5.78	2.24	3.57
C169T	SNV	chr3:49933669	62.42	7.05	21.46	4.79	2.16	2.11
C169G	SNV	chr3:49933669	57.13	13.01	20.92	4.72	1.68	2.53
C169A	SNV	chr3:49933669	66.79	8.31	16.24	4.36	1.98	2.32
T170G	SNV	chr3:49933668	68.82	8.57	14.63	4.32	1.99	1.67
T170C	SNV	chr3:49933668	60.95	9.46	20.5	4.69	2.06	2.33
T170A	SNV	chr3:49933668	61.29	8.1	21.65	4.89	2.35	1.73
A171T	SNV	chr3:49933667	63.68	9.2	18.18	4.7	1.59	2.65
A171G	SNV	chr3:49933667	64.55	10.49	16.02	4.79	1.63	2.52
A171C	SNV	chr3:49933667	56.82	14.24	19.9	4.46	2.48	2.1
G172T	SNV	chr3:49933666	60.11	10.25	19.23	6.07	1.7	2.65
G172A	SNV	chr3:49933666	62.68	9.44	19.04	4.7	2.09	2.06
GT173G	DEL	chr3:49933666	90.72	2.19	5.34	1.13	0.13	0.5
T173G	SNV	chr3:49933665	62.14	8.54	19.51	5.62	2	2.19
T173C	SNV	chr3:49933665	63.6	7.62	20.33	4.4	1.89	2.16
T173A	SNV	chr3:49933665	61.64	8.49	19.93	6.06	1.85	2.03
T174G	SNV	chr3:49933664	47.47	12.01	34.63	3.36	1.54	0.99
T174C	SNV	chr3:49933664	58.66	8.17	23.87	4.83	2.21	2.27
T174A	SNV	chr3:49933664	66.41	7.32	17.7	4.62	2.1	1.85
C175T	SNV	chr3:49933663	60.18	7.54	23.72	4.42	2.1	2.03
C175G	SNV	chr3:49933663	64.84	6.9	20.25	4.99	1.34	1.67
C176T	SNV	chr3:49933662	63.85	8.48	20.46	3.72	1.76	1.72
C176A	SNV	chr3:49933662	58.1	8.62	23.49	5.29	2.06	2.44
A177T	SNV	chr3:49933661	56.58	6.67	27.54	5.73	1.9	1.58
A177G	SNV	chr3:49933661	61.08	7.69	22.81	3.97	2.69	1.77
A177C	SNV	chr3:49933661	54.19	11.96	26.12	4.05	1.45	2.22
C178T	SNV	chr3:49933660	65.48	8.95	18.38	3.29	1.34	2.56
C178A	SNV	chr3:49933660	63.74	7.35	19.29	4.54	2.09	3
T179G	SNV	chr3:49933659	63.29	9.75	19.12	3.83	1.65	2.36
T179C	SNV	chr3:49933659	62.76	8.28	19.48	5.25	2.1	2.13
T179A	SNV	chr3:49933659	61.45	7.05	22.75	5.03	1.81	1.9
G180T	SNV	chr3:49933658	55.34	6.76	27.36	6.27	1.97	2.3
G180A	SNV	chr3:49933658	53.61	7.41	30.5	4.75	1.93	1.8
A181T	SNV	chr3:49933657	56.27	7.32	27.84	4.91	1.59	2.08
A181G	SNV	chr3:49933657	63.15	8.93	20.78	3.08	2	2.05
A182T	SNV	chr3:49933656	65.26	9.52	16.78	5.5	1.25	1.68
A182G	SNV	chr3:49933656	63.78	5.72	20.04	4.83	2.06	3.58
A182C	SNV	chr3:49933656	54.62	5.49	31.19	4.18	2.22	2.29
G183T	SNV	chr3:49933655	67.34	5.9	17.02	6.15	1.82	1.77
G183C	SNV	chr3:49933655	56.44	4.15	29.8	5.13	2.9	1.59
G183A	SNV	chr3:49933655	59.9	8.46	22.14	5.38	1.91	2.2
C184T	SNV	chr3:49933654	63.24	9.47	18.97	3.54	2.04	2.74
C184A	SNV	chr3:49933654	62.58	12	17.45	4.13	2.32	1.52
T186G	SNV	chr3:49933652	63.97	1.82	18.19	11.88	3.61	0.54
T186C	SNV	chr3:49933652	62.33	8.85	20.77	4.56	1.5	1.99
T186A	SNV	chr3:49933652	61.75	7.68	21.68	4.7	2.01	2.18
G187T	SNV	chr3:49933651	61.15	6.65	25.85	2.59	1.99	1.77
G187A	SNV	chr3:49933651	61.01	10	19.83	5.58	1.62	1.97
A188T	SNV	chr3:49933650	61.53	7.87	22.23	4.98	1.52	1.88
A188G	SNV	chr3:49933650	61.1	6.92	23.17	4.93	1.61	2.27
A188C	SNV	chr3:49933650	64.85	7.99	19.21	4.08	1.87	2
AG189A	DEL	chr3:49933650	54.88	6.84	26.13	6.5	1.7	3.95
G189T	SNV	chr3:49933649	61.76	6.66	23.06	4.04	2.69	1.79
G189C	SNV	chr3:49933649	59.68	7.58	24.49	4.21	1.92	2.11
G189A	SNV	chr3:49933649	63.58	8.63	19.33	4.9	1.7	1.86
G190T	SNV	chr3:49933648	61.77	4.79	25.4	4.45	1.58	2.01
G190A	SNV	chr3:49933648	67.09	6.26	16.86	6.19	1.49	2.11
A191T	SNV	chr3:49933647	58.06	7.76	25.53	5.07	1.47	2.1
A191G	SNV	chr3:49933647	60.73	6.12	25.01	4.94	1.64	1.57
A191C	SNV	chr3:49933647	60.33	5.1	24.66	5.2	2.24	2.46
G192T	SNV	chr3:49933646	67.44	7.75	16.8	4.91	1.68	1.42
G192C	SNV	chr3:49933646	57.99	8.37	24.09	5.18	2.42	1.95
G192A	SNV	chr3:49933646	59.23	8.95	22.35	5.34	1.81	2.32
C193T	SNV	chr3:49933645	65.14	7.95	18.48	4.69	1.8	1.95
C193G	SNV	chr3:49933645	62.05	8.3	21.35	4.53	1.85	1.92
C193A	SNV	chr3:49933645	62.09	6.07	22.34	4.9	2.81	1.79
A194T	SNV	chr3:49933644	59.66	6.89	23.72	5.84	2.02	1.87
A194G	SNV	chr3:49933644	62.77	7.98	20.84	4.5	1.82	2.09
T195G	SNV	chr3:49933643	65.06	7.25	21.9	3	1.64	1.14
T195C	SNV	chr3:49933643	60.37	8.57	21.71	5.08	1.98	2.29
T195A	SNV	chr3:49933643	64.31	9.28	17.96	4.69	1.75	2
G196T	SNV	chr3:49933642	64.16	8.53	19	4.5	1.53	2.29
G196C	SNV	chr3:49933642	64.84	6.59	19.76	4.05	2.82	1.94
G196A	SNV	chr3:49933642	64.23	7.38	19.73	4.75	1.74	2.17
C197T	SNV	chr3:49933641	62.69	8.46	20.72	5.08	1.74	1.31
C197G	SNV	chr3:49933641	54.44	9.79	21.85	7.1	2.99	3.83
C197A	SNV	chr3:49933641	61.66	8.42	20.79	4.51	2.16	2.46
C198T	SNV	chr3:49933640	60.2	8.28	23.09	4.79	1.8	1.84
C198A	SNV	chr3:49933640	56.44	10.61	23.32	5.22	2.11	2.3
A199T	SNV	chr3:49933639	63.18	7.02	20.3	4.61	2.59	2.3
A199G	SNV	chr3:49933639	63.14	6.98	20.35	4.97	2.33	2.23
A199C	SNV	chr3:49933639	65.47	7.4	17.99	5.27	1.79	2.08
AT200A	DEL	chr3:49933639	65.36	9.09	14.35	7.41	1.27	2.52
T200C	SNV	chr3:49933638	64.4	8.58	18.58	4.52	1.71	2.2
T200A	SNV	chr3:49933638	63.14	8.81	19.47	4.37	2.42	1.79
T201G	SNV	chr3:49933637	65.57	12.27	14.61	3.19	1.68	2.68
T201C	SNV	chr3:49933637	63.73	8.9	17.53	5.69	1.98	2.17
T201A	SNV	chr3:49933637	64.96	8.81	17.42	4.87	1.66	2.29
A202T	SNV	chr3:49933636	64.49	9.41	19.2	3.28	1.51	2.12
A202G	SNV	chr3:49933636	60.41	9.34	20.93	5.02	1.95	2.36
A202C	SNV	chr3:49933636	61.99	9.36	20.07	4.1	1.57	2.91
A203T	SNV	chr3:49933635	62.48	8.67	19.57	5.41	1.56	2.3
A203G	SNV	chr3:49933635	57.61	7.92	26.66	4.04	1.78	1.98
G204T	SNV	chr3:49933634	63.16	2.36	23.2	5.74	3.3	2.24
G204C	SNV	chr3:49933634	63.1	7.29	19.08	5.91	2.03	2.59
G204A	SNV	chr3:49933634	68.16	10.23	13.53	4.42	1.34	2.33
T205G	SNV	chr3:49933633	65.69	11.02	16.05	3.18	1.17	2.9
T205C	SNV	chr3:49933633	66.99	7.21	17.21	4.59	1.57	2.42
T205A	SNV	chr3:49933633	62.37	8.49	20.81	3.74	2.18	2.41
T206G	SNV	chr3:49933632	56.9	8.28	25.97	5.12	2.21	1.53
T206C	SNV	chr3:49933632	63.26	8.76	19.18	4.63	1.92	2.26
T206A	SNV	chr3:49933632	60.71	7.63	21.8	5.7	2.35	1.81
T207G	SNV	chr3:49933631	60.31	8.6	21.63	5.92	1.91	1.62
T207C	SNV	chr3:49933631	67	7.19	18.03	4.54	1.35	1.9
T207A	SNV	chr3:49933631	66.23	6.99	20.38	3.46	1.52	1.43
G208T	SNV	chr3:49933630	57.41	9.24	23.71	5.5	1.19	2.95
G208A	SNV	chr3:49933630	65.65	8.4	18.23	4.07	1.74	1.9
A209T	SNV	chr3:49933629	58.81	9.03	23.13	4.97	1.43	2.63
A209G	SNV	chr3:49933629	57.37	6.4	27.78	5.08	1.43	1.93
A209C	SNV	chr3:49933629	66.87	7.01	17.59	3.98	2.24	2.31
G210T	SNV	chr3:49933628	50.52	3.84	37.52	4.24	1.52	2.36
G210C	SNV	chr3:49933628	61.75	6.01	23.66	4.45	1.5	2.63
G210A	SNV	chr3:49933628	52.53	7.54	30.11	5.56	1.21	3.05
G211T	SNV	chr3:49933627	2.41	0.49	82.95	11.57	0.47	2.11
T212C	SNV	chr3:49933626	21.97	3.04	61.35	10.24	0.68	2.71
T212A	SNV	chr3:49933626	2.54	0.81	81.28	14.31	0.39	0.66
A213T	SNV	chr3:49933625	41.07	3.71	45.38	6.81	1.16	1.88
A213G	SNV	chr3:49933625	57.68	8.56	25.35	4.35	1.82	2.25
A214T	SNV	chr3:49933624	59.1	5.74	26.45	5.3	1.29	2.11
A214G	SNV	chr3:49933624	55.73	7.84	28.36	4.48	1.37	2.22
A214C	SNV	chr3:49933624	64.56	3.82	23.35	5.33	1.77	1.18
G215C	SNV	chr3:49933623	46.62	4.99	39.81	4.71	1.06	2.81
G215A	SNV	chr3:49933623	50.43	4.21	37.92	3.96	1.17	2.32
T216G	SNV	chr3:49933622	48.82	4.21	39.3	3.93	2.17	1.57
T216C	SNV	chr3:49933622	60.44	6.74	24.59	4.36	1.25	2.61
T216A	SNV	chr3:49933622	57.81	7.97	25.96	4.53	1.6	2.13
G217T	SNV	chr3:49933621	59.51	10.55	21.17	4.27	2.09	2.41
G217C	SNV	chr3:49933621	61.28	12.33	15.84	5.75	2.43	2.37
G217A	SNV	chr3:49933621	65.44	5.93	19.87	4.39	2.25	2.12
GT218G	DEL	chr3:49933621	57.37	28.13	8.52	3.9	0.84	1.24
T218G	SNV	chr3:49933620	66.21	3.97	23.84	4.1	0.23	1.65
T218C	SNV	chr3:49933620	59.76	7.1	23.17	5.74	2.05	2.18
T218A	SNV	chr3:49933620	61.98	8.9	20.22	4.36	2.32	2.22
TA219T	DEL	chr3:49933620	53.96	10.25	27.43	3.35	1.74	3.27
A219T	SNV	chr3:49933619	60.16	7.25	24.09	4.17	1.87	2.45
A219G	SNV	chr3:49933619	66.33	6.78	18.71	4.4	1.83	1.94
A220T	SNV	chr3:49933618	59.79	14.08	17.8	3.91	1.88	2.54
A220G	SNV	chr3:49933618	61.81	7.06	20.91	6	2.2	2.03
A220C	SNV	chr3:49933618	66.43	8.41	16.37	4.72	2.14	1.92
AG221A	DEL	chr3:49933618	53.75	14.71	23.61	3.9	1.33	2.7
G221T	SNV	chr3:49933617	59.09	9.47	21.68	5.31	2.18	2.27
G221A	SNV	chr3:49933617	55.52	7.82	28.24	4.37	1.98	2.07
G222T	SNV	chr3:49933616	59.61	6.5	25.39	5.25	2.06	1.19
G222A	SNV	chr3:49933616	57.69	5.99	27.07	5.56	1.62	2.06
G223T	SNV	chr3:49933615	68.63	9.33	15.34	4.03	0.92	1.75
G223A	SNV	chr3:49933615	56.03	8.61	25.64	5.91	1.78	2.03
A224T	SNV	chr3:49933614	59.16	10.56	22	4.68	1.72	1.88
A224G	SNV	chr3:49933614	60.77	11.25	18.37	5.45	1.84	2.31
T225C	SNV	chr3:49933613	64.08	9.46	16.83	5.76	1.85	2.02
T225A	SNV	chr3:49933613	57.36	5.7	22.85	7.34	2.27	4.47
TA226T	DEL	chr3:49933613	52.12	24.78	14.48	4.88	2.21	1.53
A226T	SNV	chr3:49933612	58.44	10.49	20.96	6.13	1.77	2.21
A226G	SNV	chr3:49933612	65.44	9.9	15.89	4.31	2.14	2.33
A226C	SNV	chr3:49933612	56.64	15.4	20.2	2.11	2.02	3.63
A226AT	IN	chr3:49933612	55.73	7.24	24.08	8.58	2.66	1.71
A226AG	IN	chr3:49933612	65.53	5.6	20.73	5.15	1.47	1.53
AG227A	DEL	chr3:49933612	56.16	5.45	32.28	2.29	2.68	1.14
G227T	SNV	chr3:49933611	59.04	8.2	21.5	6.81	2.27	2.17
[truncated: 1,325 more rows]

## Sheet: MCF7 ctrl rep1
mutation	mutation type	genomic position	AE inclusion (%)	AE skipping (%)	full IR (%)	first IR (%)	second IR (%)	other (%)
[truncated: 1,959 more rows]

[truncated: 13 more sheets: MCF7 ctrl rep2, MCF7 ctrl rep3, MCF7 ctrl average frequency, MCF7 KD rep1, MCF7 KD rep2, MCF7 KD rep3, MCF7 KD average frequency, MCF7 rep1 synergy, MCF7 rep2 synergy, MCF7 rep3 synergy, MCF7 average synergy, HEK293T median-based estimates, MCF7 median delta frequency]
