# Supplementary material for: Decoding a cancer-relevant splicing decision in the RON proto-oncogene using high-throughput mutagenesis
Source: Nat Commun. 2018 Aug 17;9:3315. doi: 10.1038/s41467-018-05748-7 (PMC6098099; doi:10.1038/s41467-018-05748-7)
Supplement: Supplementary file 8 — Supplementary Data 5 [file 41467_2018_5748_MOESM8_ESM.xlsx]

## Sheet: Supplementary Data 5
Supplementary Data 5: Mutation effects on RON exon 11 splicing in cancer patients.
Mutation	Genomic position (hg19)	Cohort	Total patients	Patients with mutation	Average supporting reads	delta AE skipping (1-PSI; TCGA)	delta AE skipping weighted average (1-PSI; TCGA)	delta AE skipping (our screen)
G43T	chr3:49933795	BLCA	242	1	26.5	-17.7561	-17.7561	-5.51667
G56A	chr3:49933782	COAD	281	1	76.5	9.63907	9.63907	0.583333
G56T	chr3:49933782	SKCM	44	1	26	-6.0564	-6.0564	5.31667
G76T	chr3:49933762	CESC	247	1	181.5	-1.51518	-1.51518	0.45
G81A	chr3:49933757	BLCA	242	1	39.5	13.9611	13.9611	2.48333
G103T	chr3:49933735	HNSC	423	1	19	-	-	-
A118T	chr3:49933720	OV	175	1	14.5	-	-	-
C119A	chr3:49933719	ESCA	172	1	297.5	-17.7453	-17.7453	-10.85
C124T	chr3:49933714	LUAD	444	1	138	2.78409	2.78409	-2.61667
C133T	chr3:49933705	STAD	391	1	39	-3.52026	-3.52026	-1.01667
C144A	chr3:49933694	OV	178	1	23.5	-	-	-
G221T	chr3:49933617	HNSC	423	1	21.5	-	-	-
G222A	chr3:49933616	BRCA	778	1	18	-	-	-
G222T	chr3:49933616	COAD	281	1	87.5	-21.5841	-21.5841	0.0166667
G242T	chr3:49933596	THYM	49	1	16	-	-	-
A246G	chr3:49933592	STAD	391	1	95.5	-3.45314	-3.45314	17.55
T277G	chr3:49933561	BLCA	242	6	46	5.74291	1.19864	14.85
T277G	chr3:49933561	PAAD	159	1	63	-10.5631	1.19864	14.85
T277G	chr3:49933561	OV	175	8	29.8125	3.02379	1.19864	14.85
T277G	chr3:49933561	BRCA	739	8	27.4375	-3.45005	1.19864	14.85
T277G	chr3:49933561	LUSC	268	9	34.6111	-2.95614	1.19864	14.85
T277G	chr3:49933561	CESC	247	10	46.55	4.11714	1.19864	14.85
T277G	chr3:49933561	KIRC	5	1	10	-	-	-
T277G	chr3:49933561	KIRP	45	1	11.5	-	-	-
T277G	chr3:49933561	THCA	271	12	22.625	-	-	-
T277G	chr3:49933561	LUAD	444	15	51.9333	4.93968	1.19864	14.85
T277G	chr3:49933561	STAD	391	4	127.5	4.12184	1.19864	14.85
T277G	chr3:49933561	HNSC	423	18	45.3056	-1.71892	1.19864	14.85
C278G	chr3:49933560	STAD	391	1	99	10.6989	10.6989	11.0833
C287T	chr3:49933551	SKCM	44	1	12	-	-	-
G297A	chr3:49933541	THCA	271	1	25	42.9596	42.9596	54.65
C345A	chr3:49933493	SKCM	44	2	27	-3.98035	-3.98035	17.8167
G348T	chr3:49933490	HNSC	423	1	21	-	0	-
G370T	chr3:49933468	HNSC	423	1	74.5	34.3732	34.3732	31.3167
C375A	chr3:49933463	CESC	247	1	116	10.3519	10.3519	15.3833
C376A	chr3:49933462	OV	178	1	23.5	-	-	-
G381A	chr3:49933457	CESC	247	1	16	-	-	-
C398A	chr3:49933440	HNSC	423	1	34.5	-2.19908	-2.19908	-4.75
C398A	chr3:49933440	SKCM	44	1	16	-	-	-
C403T	chr3:49933435	LUSC	268	1	44	7.62472	7.62472	-5.28333
C406A	chr3:49933432	SKCM	44	1	15.5	-	-	-
C411A	chr3:49933427	HNSC	423	1	34.5	-2.19908	-2.19908	-14.0833
C437A	chr3:49933401	HNSC	423	1	44.5	-4.86966	-4.86966	-3.78333
G471A	chr3:49933367	DLBC	3	1	57	17.1415	17.1415	11.2833
C478T	chr3:49933360	BRCA	739	1	30.5	-17.1528	-9.00046	0.0166667
C478T	chr3:49933360	COAD	281	1	66	-0.848159	-9.00046	0.0166667
G479T	chr3:49933359	HNSC	423	1	24	-	-	-
G479T	chr3:49933359	SKCM	44	1	11.5	-	-	-
G499T	chr3:49933339	BLCA	242	1	44.5	0.136649	0.136649	-2.08333
G500T	chr3:49933338	LUSC	268	1	55	-14.1935	-14.1935	5.51667
A547T	chr3:49933291	UCEC	61	1	22	-	-	-
A549G	chr3:49933289	CESC	247	1	43	-2.25835	-2.25835	0.683333
G568A	chr3:49933270	BLCA	242	1	11.5	-	-	-
G579T	chr3:49933259	BLCA	242	1	36	18.1454	18.1454	-4.25
G582A	chr3:49933256	COAD	281	1	32	-13.7269	-13.7269	-14.0167
G582T	chr3:49933256	THCA	271	1	18	-	-	-
C587A	chr3:49933251	HNSC	423	1	19	-	-	-
G599A	chr3:49933239	HNSC	423	1	15	-	-	-
C602T	chr3:49933236	COAD	281	1	47	-8.93971	-8.93971	-0.583333
C615A	chr3:49933223	BRCA	739	1	19.5	-	-	-
G636T	chr3:49933202	BLCA	242	1	23	-	-	-
C640G	chr3:49933198	THCA	271	1	24.5	-29.0404	-7.81177	-14.8167
C640G	chr3:49933198	HNSC	423	1	40	13.4169	-7.81177	-14.8167
C646A	chr3:49933192	BRCA	739	1	56	-27.6036	-27.6036	-5.88333
C646A	chr3:49933192	LIHC	24	1	21	-	-	-
C646T	chr3:49933192	CESC	247	1	87.5	-5.02246	-5.02246	-16.1167
G656T	chr3:49933182	BRCA	739	1	39	-4.20614	-4.20614	0.483333
G676T	chr3:49933162	SKCM	44	1	25	-9.28717	-9.28717	-11.1833
G690T	chr3:49933148	SKCM	44	1	26	-6.0564	-6.0564	-15.1833
T692C	chr3:49933146	COAD	281	1	60	-3.72695	-3.72695	-25.4167
A694G	chr3:49933144	COAD	281	1	133.5	3.96968	3.96968	-24.05
