# Supplementary material for: Decoding a cancer-relevant splicing decision in the RON proto-oncogene using high-throughput mutagenesis
Source: Nat Commun. 2018 Aug 17;9:3315. doi: 10.1038/s41467-018-05748-7 (PMC6098099; doi:10.1038/s41467-018-05748-7)
Supplement: Supplementary file 10 — Supplementary Data 7 [file 41467_2018_5748_MOESM10_ESM.xlsx]

## Sheet: Supplementary Data 7
Supplementary Data 7: Correlation of RNA-binding protein expression with RON exon 11 splicing in TCGA tumour samples and healthy tissues.
RBP gene	Ensembl ID	TCGA				GTEx			Source
		Spearman correlation	Regression slope	P-value	FDR	Spearman correlation	P-value	FDR
ACIN1	ENSG00000100813	0.128982	0.0218169	3.32597e-18	2.20202e-17	0.216209	2.24005e-30	5.32011e-29	Papasaikas et al., 2015
ACO1	ENSG00000122729	-0.014153	-0.00139304	0.341769	0.385998	0.0447675	0.01904	0.0314574	ATtRACT
ADAR	ENSG00000160710	-0.047611	-0.0091704	0.00137553	0.00244538	-0.0316317	0.0976555	0.135435	ATtRACT
ASCL1	ENSG00000139352	0.0207835	-0.000366765	0.162674	0.196437	0.0879252	3.99202e-06	1.02498e-05	Papasaikas et al., 2015
BAT1	ENSG00000198563	0.15987	0.0272104	3.16495e-27	6.7519e-26	0.0741391	0.000101694	0.000219568	Papasaikas et al., 2015
BCAS2	ENSG00000116752	-0.0496393	-0.00626205	0.000849281	0.00159865	-0.0424485	0.0262044	0.0421935	Papasaikas et al., 2015
BUB3	ENSG00000154473	-0.126519	-0.023533	1.43431e-17	8.34506e-17	0.151695	1.37734e-15	1.1378e-14	Papasaikas et al., 2015
BUD13	ENSG00000137656	0.0592562	0.0116546	6.78786e-05	0.000148099	0.0451376	0.0180716	0.0303858	Papasaikas et al., 2015
BUD31	ENSG00000106245	0.100081	0.0148897	1.59361e-11	6.51006e-11	0.00427225	0.823028	0.873605	Papasaikas et al., 2015
C19ORF29	ENSG00000105298	0.0917657	0.0182745	6.54439e-10	2.3269e-09	0.0349845	0.0669526	0.10096	Papasaikas et al., 2015
C19orf43	ENSG00000123144	0.0987166	0.015212	2.9952e-11	1.15016e-10	0.113778	2.29122e-09	9.0694e-09	Papasaikas et al., 2015
CCDC55	ENSG00000126653	-0.137156	-0.021688	2.11843e-20	2.03369e-19	-0.0326119	0.0876959	0.12528	Papasaikas et al., 2015
CD2BP2	ENSG00000169217	-0.0266777	-0.00516856	0.0731012	0.0954791	-0.00206075	0.914091	0.935774	Papasaikas et al., 2015
CDC40	ENSG00000168438	-0.0344574	-0.00557132	0.0206067	0.0290918	0.0339788	0.0751909	0.109894	Papasaikas et al., 2015
CDC5L	ENSG00000096401	-0.0615505	-0.00740854	3.50145e-05	8.19852e-05	0.0123791	0.516942	0.584637	Papasaikas et al., 2015
CDK10	ENSG00000185324	0.211388	0.0359266	9.08675e-47	8.72328e-45	0.280572	8.53729e-51	5.40695e-49	Papasaikas et al., 2015
CDK12	ENSG00000167258	-0.146277	-0.022507	5.17315e-23	6.62163e-22	-0.00752353	0.693684	0.748863	Papasaikas et al., 2015
CELF1	ENSG00000149187	0.024004	0.00318308	0.106848	0.134966	0.104274	4.40829e-08	1.41962e-07	ATtRACT
CELF2	ENSG00000048740	-0.0539595	-0.00640556	0.000286755	0.000567598	-0.0866289	5.53157e-06	1.37055e-05	ATtRACT
CELF4	ENSG00000101489	0.136702	0.0211606	2.82864e-20	2.58619e-19	0.0389597	0.0413201	0.0648827	ATtRACT
CELF5	ENSG00000161082	-0.0192936	-0.00314219	0.194965	0.23107	0.00162242	0.932315	0.942233	ATtRACT
CELF6	ENSG00000140488	0.14297	0.0228465	4.79169e-22	5.4118e-21	0.126417	3.041e-11	1.5205e-10	ATtRACT
CFAP20	ENSG00000070761	0.0528089	0.0112469	0.000385926	0.000756099	0.0082312	0.666535	0.723666	Papasaikas et al., 2015
CHERP	ENSG00000085872	0.0642128	0.0119317	1.57822e-05	3.98707e-05	-0.0120662	0.527592	0.593151	Papasaikas et al., 2015
CMTR1	ENSG00000137200	0.035671	0.00858069	0.0165434	0.0238822	0.0152178	0.425629	0.496132	ATtRACT
CPEB4	ENSG00000113742	-0.134969	-0.0223495	8.45e-20	6.4896e-19	-0.0261991	0.170141	0.218424	ATtRACT
CPSF6	ENSG00000111605	0.00993353	-2.71557e-05	0.504626	0.538268	0.0581574	0.00231057	0.00418103	Papasaikas et al., 2015
CRNKL1	ENSG00000101343	-0.127722	-0.0245221	7.04927e-18	4.22956e-17	0.0776936	4.63318e-05	0.00010868	Papasaikas et al., 2015
CTNNBL1	ENSG00000132792	-0.0123261	-0.00281347	0.407699	0.449875	-0.105773	2.8118e-08	9.37267e-08	Papasaikas et al., 2015
CWC15	ENSG00000150316	0.0628876	0.0116128	2.35565e-05	5.72513e-05	0.127099	2.37813e-11	1.2212e-10	Papasaikas et al., 2015
CWC22	ENSG00000163510	0.0500141	0.00991364	0.00077539	0.00147401	0.129179	1.114e-11	6.41395e-11	Papasaikas et al., 2015
DAZAP1	ENSG00000071626	0.0725143	0.0130726	1.07691e-06	2.91222e-06	0.0398302	0.0369849	0.0590516	ATtRACT
DBR1	ENSG00000138231	-0.0192134	-0.00408467	0.196828	0.231847	-0.0759586	6.82891e-05	0.00015288	Papasaikas et al., 2015
DDX12	ENSG00000214826	0.149608	0.0242889	5.2084e-24	7.6924e-23	0.0915545	1.56344e-06	4.24363e-06	Papasaikas et al., 2015
DDX17	ENSG00000100201	0.120771	0.0181623	3.89594e-16	2.07784e-15	0.127296	2.21384e-11	1.16842e-10	Papasaikas et al., 2015
DDX28	ENSG00000182810	-0.0226981	-0.000923663	0.127315	0.15873	-0.30788	2.61877e-61	2.48783e-59	Papasaikas et al., 2015
DDX41	ENSG00000183258	-0.0334617	-0.00506198	0.0245651	0.0339317	-0.00329342	0.863115	0.906032	Papasaikas et al., 2015
DDX48	ENSG00000141543	-0.0620538	-0.00990517	3.01894e-05	7.15599e-05	-0.0906936	1.95908e-06	5.1698e-06	Papasaikas et al., 2015
DDX5	ENSG00000108654	-0.0478786	-0.00858994	0.00129204	0.00231843	-0.00735566	0.700184	0.75161	Papasaikas et al., 2015
DDX58	ENSG00000107201	-0.068965	-0.0117409	3.52231e-06	9.0171e-06	0.0677271	0.000385851	0.000755791	ATtRACT
DEK	ENSG00000124795	0.046686	0.00584988	0.00170393	0.00294734	0.079096	3.36633e-05	7.99502e-05	Papasaikas et al., 2015
DHX16	ENSG00000204560	0.117259	0.0196493	2.71674e-15	1.40977e-14	0.0964073	4.22154e-07	1.23399e-06	Papasaikas et al., 2015
DHX38	ENSG00000140829	0.100244	0.0181533	1.4768e-11	6.16403e-11	-0.129885	8.58595e-12	5.09791e-11	Papasaikas et al., 2015
DHX8	ENSG00000067596	-0.165476	-0.027413	4.46896e-29	1.22577e-27	-0.18315	4.05377e-22	5.50154e-21	Papasaikas et al., 2015
DHX9	ENSG00000135829	-0.0742157	-0.0110365	5.98241e-07	1.66467e-06	-0.0289435	0.129645	0.17106	ATtRACT and Papasaikas et al., 2015
DNAJC8	ENSG00000126698	0.0384581	0.00628067	0.00976339	0.0147604	0.0390559	0.0408207	0.0646327	Papasaikas et al., 2015
EFTUD2	ENSG00000108883	-0.0768245	-0.0129658	2.36912e-07	6.78911e-07	-0.147374	8.6704e-15	6.86407e-14	Papasaikas et al., 2015
ELAVL2	ENSG00000107105	-0.10786	-0.0142946	3.70529e-13	1.65445e-12	0.0555047	0.00363864	0.00646891	ATtRACT
ERI1	ENSG00000104626	0.0177357	0.00353924	0.233512	0.271723	0.0946811	6.77521e-07	1.89307e-06	ATtRACT
ESRP1	ENSG00000104413	-0.0601013	-0.00903428	5.33331e-05	0.000119069	-0.0693029	0.000280841	0.000579998	ATtRACT and Papasaikas et al., 2015
ESRP2	ENSG00000103067	0.0430794	0.00122194	0.00379297	0.00622437	0.0143093	0.45378	0.519387	ATtRACT and Papasaikas et al., 2015
EWSR1	ENSG00000182944	0.111801	0.0201717	4.95636e-14	2.32103e-13	-0.0875212	4.42123e-06	1.12005e-05	Papasaikas et al., 2015
EXOSC4	ENSG00000178896	0.0397059	0.00722521	0.00763026	0.0120083	-0.121991	1.45379e-10	6.73707e-10	Papasaikas et al., 2015
EZH2	ENSG00000106462	0.039572	0.00373501	0.00783719	0.0122337	-0.0205553	0.281848	0.343276	Papasaikas et al., 2015
F2	ENSG00000180210	0.0441739	0.00914237	0.00299252	0.00495314	0.116412	9.66055e-10	3.99023e-09	ATtRACT
FMR1	ENSG00000102081	-0.0147851	-0.00272633	0.320644	0.36645	0.0633746	0.000897004	0.00167089	ATtRACT
FUS	ENSG00000089280	0.0641286	0.0118548	1.61922e-05	4.03754e-05	-0.0974249	3.18196e-07	9.44644e-07	ATtRACT and Papasaikas et al., 2015
G3BP2	ENSG00000138757	-0.128093	-0.0201613	5.65528e-18	3.50262e-17	-0.0700584	0.000240608	0.000502368	ATtRACT
GRSF1	ENSG00000132463	-0.0808379	-0.0121872	5.37011e-08	1.663e-07	-0.0316821	0.0971227	0.135435	ATtRACT
HDAC1	ENSG00000116478	0.00568233	0.000857841	0.702704	0.717656	0.121538	1.70065e-10	7.69343e-10	Papasaikas et al., 2015
HNRNPA0	ENSG00000177733	0.0335436	0.00650452	0.0242161	0.0339317	-0.0775212	4.81696e-05	0.000111612	ATtRACT and Papasaikas et al., 2015
HNRNPA1	ENSG00000135486	-0.0385781	-0.00366858	0.00953727	0.014533	-0.00312582	0.870017	0.90826	ATtRACT and Papasaikas et al., 2015
HNRNPA2B1	ENSG00000122566	0.0185263	0.00276287	0.213324	0.249745	0.109026	1.03704e-08	3.71767e-08	ATtRACT and Papasaikas et al., 2015
HNRNPA3	ENSG00000170144	0.000189594	0.00145276	0.98984	0.98984	0.128485	1.43641e-11	8.02702e-11	Papasaikas et al., 2015
HNRNPC	ENSG00000092199	-0.0800443	-0.0118615	7.2431e-08	2.20742e-07	0.0531695	0.0053465	0.00915166	ATtRACT and Papasaikas et al., 2015
HNRNPD	ENSG00000138668	0.0835794	0.013498	1.86932e-08	6.29666e-08	0.0234251	0.220024	0.276851	ATtRACT and Papasaikas et al., 2015
HNRNPDL	ENSG00000152795	0.0353322	0.00775771	0.0176002	0.0252182	-0.00927864	0.627148	0.688127	ATtRACT
HNRNPF	ENSG00000169813	-0.154473	-0.0256165	1.65794e-25	2.89386e-24	-0.0729711	0.000130709	0.000279041	ATtRACT and Papasaikas et al., 2015
HNRNPH1	ENSG00000169045	0.0331867	0.00618761	0.0257682	0.0353393	0.097686	2.95798e-07	8.92089e-07	ATtRACT and Papasaikas et al., 2015
HNRNPH2	ENSG00000126945	-0.26553	-0.0441811	1.03143e-73	1.98035e-71	-0.124667	5.68273e-11	2.76851e-10	ATtRACT and Papasaikas et al., 2015
HNRNPH3	ENSG00000096746	0.138234	0.0227154	1.06212e-20	1.0733e-19	0.118376	5.00891e-10	2.11487e-09	ATtRACT and Papasaikas et al., 2015
HNRNPK	ENSG00000165119	-0.146313	-0.0206281	5.04708e-23	6.62163e-22	-0.0949644	6.27268e-07	1.77882e-06	ATtRACT and Papasaikas et al., 2015
HNRNPL	ENSG00000104824	0.0281014	0.00576847	0.0590424	0.0776448	-0.0928989	1.09483e-06	3.01476e-06	ATtRACT
HTATSF1	ENSG00000102241	-0.129307	-0.0202209	2.73583e-18	1.876e-17	-0.015291	0.423405	0.496132	Papasaikas et al., 2015
IFIH1	ENSG00000115267	-0.0450056	-0.00880515	0.00249081	0.00419505	0.114717	1.68764e-09	6.82237e-09	ATtRACT
IGF2BP3	ENSG00000136231	0.134824	0.0206418	9.25104e-20	6.83153e-19	0.034404	0.0716124	0.105476	ATtRACT and Papasaikas et al., 2015
IK	ENSG00000113141	-0.104298	-0.0152361	2.14623e-12	9.36539e-12	-0.0644359	0.000733572	0.00137999	Papasaikas et al., 2015
ILF2	ENSG00000143621	-0.00712708	0.000321991	0.632141	0.652533	-0.165624	2.52958e-18	2.67011e-17	Papasaikas et al., 2015
ILF3	ENSG00000129351	0.099164	0.0185514	2.43753e-11	9.55112e-11	-0.0535215	0.00504962	0.00872207	Papasaikas et al., 2015
ISY1	ENSG00000240682	0.025338	0.00459007	0.0887242	0.114329	-0.0297937	0.11875	0.160018	Papasaikas et al., 2015
KAT5	ENSG00000172977	0.0716621	0.0142835	1.43865e-06	3.8364e-06	-0.146698	1.15026e-14	8.74195e-14	Papasaikas et al., 2015
KHDRBS1	ENSG00000121774	-0.0731475	-0.012201	8.66594e-07	2.37694e-06	-0.00603192	0.752175	0.802883	Papasaikas et al., 2015
KHSRP	ENSG00000088247	0.0370977	0.00677694	0.0126802	0.0188729	0.00177161	0.926107	0.940965	ATtRACT
LIN28A	ENSG00000131914	0.0494552	0.00750842	0.00088792	0.00163924	-0.0324015	0.0897611	0.12633	ATtRACT
LSM2	ENSG00000204392	0.0581248	0.0100457	9.32887e-05	0.000201252	0.0677292	0.00038569	0.000755791	Papasaikas et al., 2015
LSM4	ENSG00000130520	0.0117989	0.00165862	0.428051	0.469633	0.0100057	0.600411	0.671048	Papasaikas et al., 2015
LSM6	ENSG00000164167	0.088928	0.0157383	2.16457e-09	7.55632e-09	0.0904144	2.10692e-06	5.48376e-06	Papasaikas et al., 2015
LUC7L3	ENSG00000108848	0.0553011	0.00728826	0.000201371	0.000402742	0.159456	4.41492e-17	4.19417e-16	Papasaikas et al., 2015
MBD2	ENSG00000134046	0.00962883	-0.00200191	0.517786	0.549254	0.0284895	0.135772	0.177907	Papasaikas et al., 2015
MBNL1	ENSG00000152601	-0.0293926	-0.00606183	0.0483067	0.0639647	-0.00149676	0.937545	0.942506	ATtRACT
NHP2L1	ENSG00000100138	0.0451536	0.00986674	0.00241008	0.004095	-0.00970474	0.611416	0.679351	Papasaikas et al., 2015
NONO	ENSG00000147140	-0.0818926	-0.0142374	3.59257e-08	1.18926e-07	-0.0514435	0.00704223	0.0119466	ATtRACT and Papasaikas et al., 2015
NOSIP	ENSG00000142546	0.0757787	0.014499	3.447e-07	9.7327e-07	0.0759517	6.83935e-05	0.00015288	Papasaikas et al., 2015
NOVA1	ENSG00000139910	-0.050667	-0.0102489	0.000660739	0.00126862	0.123711	7.96736e-11	3.78449e-10	ATtRACT
NOVA2	ENSG00000104967	0.0425822	0.00758561	0.00421715	0.00686181	0.0536576	0.00493895	0.00860918	ATtRACT
NUDT21	ENSG00000167005	-0.0578512	-0.00848904	0.000100663	0.000212387	0.0197324	0.301563	0.358106	ATtRACT and Papasaikas et al., 2015
NXF1	ENSG00000162231	0.189867	0.0294444	6.62432e-38	4.23957e-36	0.0669926	0.000446437	0.000865542	ATtRACT
OAS1	ENSG00000089127	-0.0310515	-0.00700245	0.0369643	0.0492858	0.120614	2.33906e-10	1.03354e-09	ATtRACT
PAXBP1	ENSG00000159086	0.161825	0.0261628	7.29013e-28	1.74963e-26	0.16359	6.5763e-18	6.5763e-17	Papasaikas et al., 2015
PCBP1	ENSG00000169564	0.0386292	0.00661633	0.00944245	0.0145036	-0.00070598	0.970519	0.970519	ATtRACT
PCBP2	ENSG00000197111	-0.0137341	-0.000527392	0.35625	0.4	-0.036857	0.053593	0.0821183	ATtRACT
PHC1	ENSG00000111752	0.140174	0.0233003	3.02271e-21	3.22422e-20	0.199219	5.96911e-26	1.13413e-24	Papasaikas et al., 2015
PIWIL1	ENSG00000125207	0.0419022	0.00913076	0.00486693	0.00785253	-0.027452	0.150611	0.196	ATtRACT
PLRG1	ENSG00000171566	-0.0131904	-0.000454952	0.375615	0.419291	0.0144068	0.450709	0.518999	Papasaikas et al., 2015
PPIE	ENSG00000084072	0.0810034	0.0125949	5.04345e-08	1.58745e-07	0.00288436	0.879979	0.913639	ATtRACT and Papasaikas et al., 2015
PPIH	ENSG00000171960	0.021863	0.00363402	0.141924	0.175803	-0.0292439	0.125711	0.168204	Papasaikas et al., 2015
PPIL3	ENSG00000240344	0.0106736	0.00146663	0.473411	0.510645	0.0910263	1.79597e-06	4.80611e-06	Papasaikas et al., 2015
PQBP1	ENSG00000102103	0.0103241	0.00402302	0.48802	0.523463	0.0629134	0.000978043	0.00180416	Papasaikas et al., 2015
PRPF18	ENSG00000165630	0.0212375	0.00389371	0.153685	0.186756	0.0199619	0.295974	0.354593	Papasaikas et al., 2015
PRPF19	ENSG00000110107	-0.0608474	-0.00917537	4.29937e-05	9.82712e-05	-0.138727	2.92873e-13	2.06096e-12	Papasaikas et al., 2015
PRPF31	ENSG00000105618	0.169977	0.0291938	1.30738e-30	4.18361e-29	0.0308908	0.105768	0.144574	Papasaikas et al., 2015
PRPF4	ENSG00000136875	-0.153932	-0.0243392	2.44526e-25	3.91241e-24	-0.0216833	0.256271	0.318246	Papasaikas et al., 2015
PRPF6	ENSG00000101161	-0.060852	-0.00950521	4.29362e-05	9.82712e-05	-0.127986	1.72307e-11	9.35379e-11	Papasaikas et al., 2015
PRPF8	ENSG00000174231	-0.0169472	-0.00124923	0.254959	0.294892	-0.119001	4.05514e-10	1.75109e-09	Papasaikas et al., 2015
PTBP1	ENSG00000011304	0.0444999	0.00665052	0.00278581	0.0046511	-0.0384455	0.0440768	0.0686441	ATtRACT and Papasaikas et al., 2015
PTBP2	ENSG00000117569	0.154674	0.0230276	1.43344e-25	2.75221e-24	0.130138	7.81885e-12	4.7922e-11	ATtRACT
PUF60	ENSG00000179950	0.0474331	0.00919257	0.00143378	0.00252555	-0.18599	9.02074e-23	1.42828e-21	Papasaikas et al., 2015
QKI	ENSG00000112531	0.0371297	0.0101049	0.0126035	0.0188729	0.0301726	0.114132	0.154893	ATtRACT
RBFOX1	ENSG00000078328	-0.0116599	0.00179422	0.43351	0.470249	0.0691797	0.000287973	0.000588333	ATtRACT
RBFOX2	ENSG00000100320	0.0360438	0.00642082	0.0154454	0.0224661	0.0953044	5.7167e-07	1.64572e-06	ATtRACT
RBM17	ENSG00000134453	0.10217	0.0149188	5.96219e-12	2.54387e-11	-0.0213664	0.263288	0.324836	Papasaikas et al., 2015
RBM22	ENSG00000086589	-0.136452	-0.0235042	3.314e-20	2.80849e-19	0.00201302	0.916073	0.935774	Papasaikas et al., 2015
RBM24	ENSG00000112183	-0.110029	-0.0182937	1.23527e-13	5.64694e-13	0.111843	4.27023e-09	1.62269e-08	ATtRACT
RBM25	ENSG00000119707	0.112036	0.0170399	4.38594e-14	2.10525e-13	-0.0314672	0.0994119	0.136871	ATtRACT and Papasaikas et al., 2015
RBM39	ENSG00000131051	-0.0130609	-0.00264453	0.380319	0.422088	0.157577	1.03223e-16	8.91472e-16	Papasaikas et al., 2015
RBM5	ENSG00000003756	0.126245	0.0212582	1.6856e-17	9.51867e-17	0.248157	9.01415e-40	3.42538e-38	ATtRACT and Papasaikas et al., 2015
RBM6	ENSG00000004534	0.144881	0.025162	1.3322e-22	1.59864e-21	0.316407	7.86087e-65	1.49357e-62	Papasaikas et al., 2015
RBMX	ENSG00000147274	-0.0557533	-0.00818132	0.000178437	0.000368386	0.0824294	1.54259e-05	3.71002e-05	ATtRACT
RC3H1	ENSG00000135870	0.0092102	0.000257467	0.536153	0.565612	-0.0324418	0.0893629	0.12633	ATtRACT
RNPS1	ENSG00000205937	-0.0251823	-0.00379942	0.0907024	0.116099	-0.00948851	0.619378	0.684196	Papasaikas et al., 2015
RPS6KA5	ENSG00000100784	-0.128852	-0.0200505	3.59456e-18	2.30052e-17	0.107093	1.88237e-08	6.50275e-08	Papasaikas et al., 2015
SAMD4A	ENSG00000020577	0.0334888	0.00628506	0.0244493	0.0339317	0.0256431	0.179392	0.228754	ATtRACT
SART1	ENSG00000175467	0.135206	0.0266989	7.28082e-20	5.82466e-19	-0.0228982	0.230578	0.288223	Papasaikas et al., 2015
SF1	ENSG00000168066	0.0861091	0.0122985	6.85183e-09	2.3492e-08	0.0647761	0.000687339	0.00130594	ATtRACT and Papasaikas et al., 2015
SF3A2	ENSG00000104897	0.117142	0.01847	2.89565e-15	1.46307e-14	0.00241557	0.899372	0.928699	Papasaikas et al., 2015
SF3A3	ENSG00000183431	-0.0316248	-5.6528e-05	0.0336122	0.0451297	-0.106657	2.15063e-08	7.29679e-08	Papasaikas et al., 2015
SF3B1	ENSG00000115524	0.0214675	0.00207581	0.149278	0.183727	0.0328819	0.0851007	0.123428	Papasaikas et al., 2015
SF3B3	ENSG00000189091	0.0408818	0.007234	0.0060127	0.00954082	0.0203875	0.285794	0.345865	Papasaikas et al., 2015
SF3B6	ENSG00000115128	0.0325867	0.0047156	0.0285709	0.0386311	0.0546581	0.00419018	0.00737161	Papasaikas et al., 2015
SFPQ	ENSG00000116560	-0.00692337	-0.00029717	0.641908	0.659071	-0.0988738	2.11721e-07	6.52872e-07	Papasaikas et al., 2015
SLU7	ENSG00000164609	-0.178455	-0.0286268	1.29033e-33	6.1936e-32	-0.0866124	5.55434e-06	1.37055e-05	Papasaikas et al., 2015
SMARCA4	ENSG00000127616	0.0410219	0.006915	0.00584222	0.00934756	-0.0440468	0.0210569	0.0344898	Papasaikas et al., 2015
SMNDC1	ENSG00000119953	0.00202066	-0.000980615	0.89204	0.89671	0.107444	1.69041e-08	5.94775e-08	Papasaikas et al., 2015
SMU1	ENSG00000122692	-0.081011	-0.0104105	5.02907e-08	1.58745e-07	-0.170753	2.15513e-19	2.40868e-18	Papasaikas et al., 2015
SNRNP40	ENSG00000060688	-0.0553631	-0.00851809	0.00019807	0.000400309	-0.0706791	0.000211667	0.000446852	Papasaikas et al., 2015
SNRNP70	ENSG00000104852	0.175758	0.0293095	1.21189e-32	4.65367e-31	0.183457	3.45021e-22	5.04261e-21	Papasaikas et al., 2015
SNRPA	ENSG00000077312	0.125152	0.0199736	3.19138e-17	1.7507e-16	0.0999692	1.55006e-07	4.90852e-07	Papasaikas et al., 2015
SNRPB2	ENSG00000125870	-0.00821192	-0.00123782	0.581233	0.606158	-0.044893	0.0187068	0.0311781	Papasaikas et al., 2015
SNRPC	ENSG00000124562	0.0470371	0.00861831	0.00157163	0.00274321	-0.0744627	9.48006e-05	0.000207036	Papasaikas et al., 2015
SNRPD1	ENSG00000167088	0.0363019	0.00537788	0.014723	0.0215788	-0.0352564	0.0648576	0.0985836	Papasaikas et al., 2015
SNRPD2	ENSG00000125743	0.0563298	0.0110795	0.000152754	0.000318792	0.0194637	0.308195	0.363709	Papasaikas et al., 2015
SNRPD3	ENSG00000100028	0.0494885	0.00869625	0.000880817	0.00163924	0.032772	0.0861495	0.124003	Papasaikas et al., 2015
SNRPE	ENSG00000182004	-0.0386828	-0.00593957	0.00934389	0.014468	-0.0373681	0.0503597	0.0777914	Papasaikas et al., 2015
SNRPF	ENSG00000139343	0.0455736	0.00836546	0.00219374	0.0037607	-0.0246275	0.197245	0.249843	Papasaikas et al., 2015
SNW1	ENSG00000100603	-0.0715844	-0.00875335	1.47689e-06	3.88442e-06	-0.0759863	6.78712e-05	0.00015288	Papasaikas et al., 2015
SPEN	ENSG00000065526	0.0788044	0.0106559	1.14944e-07	3.39526e-07	-0.0678744	0.000374668	0.000752664	Papasaikas et al., 2015
SR140	ENSG00000163714	0.0956236	0.0146599	1.21399e-10	4.48242e-10	0.0678522	0.000376332	0.000752664	Papasaikas et al., 2015
SRP14	ENSG00000140319	0.0255129	0.0057655	0.0865426	0.112271	0.111967	4.10408e-09	1.59138e-08	ATtRACT
SRP19	ENSG00000153037	-0.0711899	-0.0127404	1.68673e-06	4.37638e-06	0.00919705	0.63018	0.688127	ATtRACT
SRP54	ENSG00000100883	-0.136428	-0.0212242	3.36434e-20	2.80849e-19	-0.105109	3.43435e-08	1.12504e-07	ATtRACT
SRP68	ENSG00000167881	-0.0213848	-0.00583612	0.150851	0.18448	-0.0346572	0.0695479	0.103948	ATtRACT
SRRM2	ENSG00000167978	-0.00232898	-0.00120338	0.875692	0.88491	0.111384	4.9407e-09	1.84065e-08	Papasaikas et al., 2015
SRSF1	ENSG00000136450	-0.114783	-0.0185399	1.03149e-14	5.07812e-14	0.26013	1.15429e-43	5.48288e-42	ATtRACT and Papasaikas et al., 2015
SRSF11	ENSG00000116754	0.0993073	0.0140935	2.28134e-11	9.12535e-11	-0.0149331	0.434338	0.503197	Papasaikas et al., 2015
SRSF2	ENSG00000161547	0.0795949	0.0134477	8.56958e-08	2.57087e-07	0.0758584	6.98196e-05	0.000154253	ATtRACT and Papasaikas et al., 2015
SRSF3	ENSG00000112081	-0.0327259	-0.00152755	0.0278984	0.0379894	0.131894	4.06358e-12	2.5736e-11	ATtRACT and Papasaikas et al., 2015
SRSF5	ENSG00000100650	0.0351936	0.00797831	0.0180493	0.0256701	0.0988518	2.13042e-07	6.52872e-07	ATtRACT and Papasaikas et al., 2015
SRSF6	ENSG00000124193	-0.0196663	0.000368876	0.186478	0.222384	0.110048	7.53503e-09	2.75318e-08	ATtRACT and Papasaikas et al., 2015
SRSF7	ENSG00000115875	0.00815059	0.00429272	0.584059	0.606158	0.157869	9.05037e-17	8.18843e-16	ATtRACT and Papasaikas et al., 2015
SRSF9	ENSG00000111786	0.0985542	0.0164042	3.22714e-11	1.21492e-10	0.0345978	0.070028	0.103948	ATtRACT and Papasaikas et al., 2015
SSB	ENSG00000138385	-0.0159324	-0.00300102	0.284523	0.327117	0.0588697	0.002039	0.0037251	ATtRACT
TAF15	ENSG00000172660	0.0117145	0.00267164	0.431363	0.470249	-0.0665902	0.000483283	0.000927513	Papasaikas et al., 2015
TARDBP	ENSG00000120948	-0.0231322	-0.00316104	0.120197	0.150836	0.141063	1.15583e-13	8.44644e-13	ATtRACT
TCERG1	ENSG00000113649	0.0203868	0.00225226	0.17085	0.20502	-0.0199304	0.296738	0.354593	Papasaikas et al., 2015
TFIP11	ENSG00000100109	0.0146288	0.0039465	0.325786	0.370124	-0.171856	1.25569e-19	1.49113e-18	Papasaikas et al., 2015
THOC4	ENSG00000183684	0.00885671	0.00300816	0.551913	0.579056	-0.135424	1.062e-12	7.2064e-12	Papasaikas et al., 2015
TIA1	ENSG00000116001	0.130729	0.0196352	1.15873e-18	8.23989e-18	0.241266	1.26646e-37	4.01044e-36	ATtRACT and Papasaikas et al., 2015
TIAL1	ENSG00000151923	0.0489676	0.00451511	0.000998269	0.00182541	0.195023	6.4455e-25	1.11331e-23	ATtRACT and Papasaikas et al., 2015
TRA2B	ENSG00000136527	0.0523716	0.00800148	0.000431388	0.000836632	0.0290421	0.128343	0.170526	ATtRACT and Papasaikas et al., 2015
U2AF2	ENSG00000063244	0.0578584	0.00948221	0.000100462	0.000212387	0.179097	3.31747e-21	4.20213e-20	Papasaikas et al., 2015
WBP11	ENSG00000084463	-0.0599586	-0.00553963	5.55614e-05	0.000122618	-0.238435	9.22788e-37	2.50471e-35	Papasaikas et al., 2015
WTAP	ENSG00000146457	0.0364622	0.0060723	0.0142896	0.0211046	-0.0208653	0.274651	0.336669	Papasaikas et al., 2015
XAB2	ENSG00000076924	0.0814946	0.015335	4.18351e-08	1.36141e-07	-0.00402482	0.833122	0.879406	Papasaikas et al., 2015
XPO5	ENSG00000124571	0.00287799	0.00289535	0.846717	0.860157	-0.0262686	0.169009	0.218424	ATtRACT
YBX1	ENSG00000065978	0.0626925	0.0155003	2.49714e-05	5.99312e-05	-0.0131941	0.489731	0.557179	ATtRACT and Papasaikas et al., 2015
YTHDC1	ENSG00000083896	-0.0249055	-0.00332615	0.0943067	0.119913	0.13467	1.41871e-12	9.29498e-12	ATtRACT
ZFP36	ENSG00000128016	0.0632466	0.0118484	2.11504e-05	5.20626e-05	0.0554975	0.00364302	0.00646891	ATtRACT
ZNF207	ENSG00000010244	-0.0604804	-0.0114109	4.78168e-05	0.00010801	0.0432521	0.0234942	0.038153	Papasaikas et al., 2015
ZNF346	ENSG00000113761	-0.0772067	-0.0153854	2.0632e-07	6.00205e-07	0.206651	7.72102e-28	1.62999e-26	ATtRACT
ZRANB2	ENSG00000132485	0.0481392	0.00704442	0.00121526	0.00220122	0.0858604	6.69721e-06	1.63137e-05	ATtRACT
