# Supplementary material for: Decoding a cancer-relevant splicing decision in the RON proto-oncogene using high-throughput mutagenesis
Source: Nat Commun. 2018 Aug 17;9:3315. doi: 10.1038/s41467-018-05748-7 (PMC6098099; doi:10.1038/s41467-018-05748-7)
Supplement: Supplementary file 11 — Supplementary Data 8 [file 41467_2018_5748_MOESM11_ESM.xlsx]

## Sheet: related to Fig. 1e
Supplementary Data 8: Splicing quantifications by semiquantitative RT-PCR upon transfections of individual minigene variants.
Plasmid ID	Barcode	Mutations	AE inclusion (%)	AE skipping (%)	Partial IR (%)	Full IR (%)
930	AGCCAAATCCATTAA	T625A	33.0508	4.53206	9.35888	53.0582
987	AGGACTGGGGTCATT	A425T,C514T,A523T,G531T,T539A,A547G	54.8195	5.12795	10.7211	29.3314
408	AATCTATTTAGCATA	T173C	42.8969	6.35097	9.52646	41.2256
451	AATGTTCCGACATCA	wt	53.7728	5.37728	10.3643	30.4857
235	AAGATGCATAGCCAT	C640T	56.8699	5.23203	10.0546	27.8435
3360	GGCAAGGTAGGACGG	T373C,C463T,T465G	47.5573	5.361	10.6788	36.4029
4388	TATTGATCAGTTATT	G109A,T327A,C423T	30.7987	12.3323	8.6262	48.2428
4921	TGCGCTGAATTATAG	wt	40.9535	6.26528	10.2995	42.4817
2181	CCGTGAATCTTAATT	G30A,G95T,A385T,C415T,T419A,G517T,G538A,C652T	17.1904	38.0264	5.49969	39.2835
4970	TGGATGTTTCAGTAA	wt	41.8054	5.40141	10.9878	41.8054
5689	TTTGTAAACTCTGGA	G79T,T374A,G457C,T545C,T586A	50.8287	19.116	8.47145	21.5838
5664	TTTGAGAGTACATTT	C453T	39.3258	7.23728	8.82353	44.6134
3115	GCAAGATGGGTAAAC	C41A,C119T,C121T,T131C,T162A,T394C,G471A,A547T,C611T	28.9462	2.06707	10.0824	58.9043
679	ACGCTTGGGGAGAAT	C307T,C415T,A494G,C646T,A689G	2.33315	61.3131	1.62778	34.726
570	ACATGAGGTGTTCAT	C320G,A416G,C612A,T622A	1.13802	62.0964	1.1405	35.625
3753	GTGGCTAAAGAGCTC	G75T,A118G,A199C,TG274T,T308C,A383T,G629A	42.8376	9.76696	11.0692	36.3263
3901	TAAAAAAAGCCCCAG	G52A,C336T,A533G	6.86082	51.239	2.81959	39.0806
653	ACGACAGGGTCGGGT	T50C,G56C,C155A,C176A,A226G,A263G,T267C,A282G,T321C,A492T,T601C,G639A	3.61033	33.9247	4.8864	57.5786
3531	GGTTAATGTCCCCTC	G340A,T605A,G651A	27.9628	11.672	8.09166	52.2735
5686	TTTGGGTTTTGTATG	C124T	49.9321	7.33696	10.428	32.303
5146	TGTTTGGCAGATGAG	T291C	8.80998	37.9507	3.63242	49.6069
614	ACCGATCGTCATGGA	A252G,T274C,C407T,T516C,G531A,G670T	35.6617	20.6897	6.21869	37.43
69	AAAGCGTTCTTAAGT	A96T,G128A,A182T,T280C,CA437C,T581G,T666C	3.23899	16.9424	3.07953	76.7391
5369	TTCGGATTGTGTGGT	G340A,A594G,C665T,C703T	10.9445	4.48818	7.77154	76.7957
1962	CAGTGGAATTAGCAA	C33T,A78G,A141AC,G204C,A246T,T491A	57.446	8.70838	0	33.8456
40	AAACAGTTGTAGGTC	A251G	47.9085	12.2631	7.68681	32.1416
2447	CGTGTTAAACTTACG	C360T,A428G,T622C	6.49909	71.4422	1.79681	20.2619
5501	TTGTACCGTTTTCTG	wt	49.8957	9.54597	7.58864	32.9697
4359	TATGTTAATTTACAA	G172A,A547G	42.8252	17.5136	8.02173	31.6395
1312	ATATCTCACCTAGAA	A78T,G349A,GC402G,A641G,T697C	73.0372	0.0850884	9.71395	17.1637
4082	TACCGCTTTAAGTCT	G72C,C198T,T386C	58.3168	7.98542	8.64811	25.0497
5638	TTTCTATGTAAACCG	A78C,A147C,C150A,C468G	21.0338	36.0707	4.18438	38.7111
3618	GTAGGCGGCTATAAA	G395T,C624T	44.5002	15.0736	7.52115	32.905
3852	GTTGAGCCTGTCAGG	T413C,G431A	50.8094	10.0495	7.44155	31.6996
2040	CATGTTTCCGACCCT	C61A,C576T,A653T	47.9748	8.57255	7.51081	35.9418
1309	ATATCACGATTATTG	A156G	40.8309	15.1504	7.48567	36.533
1134	AGTGGGGTATTCTTA	wt	48.1776	10.4734	7.28948	34.0595
1748	ATTTGAATGGTCGAT	A65G,C121G,A226C,A338C	46.0473	15.3219	7.41646	31.2143
3022	GATATATGCTTGGTA	C652T	36.1646	12.2097	9.48905	42.1367
1485	ATGAGTATGTGTAAT	C139A,C143T,A477T,G617A,T650C	33.8045	5.2858	9.28089	51.6288
3399	GGCTTAGCATTCATG	A663G	43.7811	12.4046	8.32504	35.4892
1114	AGTCGTCAATAGTAT	wt	45.6323	9.97392	8.53977	35.854
172	AACGCCGAGTACCAT	wt	47.5285	12.0913	8.36502	32.0152
4086	TACCTTATTTGCCAT	wt	38.7482	10.8298	8.3685	42.0534
1905	CACTATTCCATAAGA	wt	39.3885	10.1619	8.31835	42.1313
1187	ATAAAACAATGTAAC	wt	36.3636	9.1958	8.63636	45.8042
3803	GTTAGCCTTATCACG	wt	37.6147	10.8563	8.7156	42.8135
1929	CAGATCACGCTTCAG	wt	40.9158	10.2659	8.71492	40.1034
290	AAGTCGCAGCGCGGA	A365T,C376T	12.8936	39.0528	3.42177	44.6318
5264	TTATAATTAAGGAAA	G32T,C175A,A236G,G328A,C344A	30.6463	11.8373	7.98838	49.528
4521	TCATTACCCTCGAAT	G72T,T386C,A580G	42.3709	3.97442	11.1695	42.4852
1963	CAGTGTATATTTTAA	C587T	41.8809	11.8997	8.60188	37.6176
5790	TTTTTTTCATGTTTC	C399T,T429C,G472A	29.9738	9.56806	9.01832	51.4398
3619	GTAGGGAGTAGCAGT	C124T	44.164	8.1388	10.0946	37.6025
1007	AGGCCTTTATGTCTT	T620C,A663T	46.6084	12.5853	7.84983	32.9565
3109	GCAAAGGTTCTAACA	C107T,T545C,T616A	32.9733	12.1783	7.51379	47.3346
214	AACTTGATCTTAATA	C77T,T131A,A219T,G297A	0	38.9241	0	61.0759
1575	ATGTCTTGTCAGTAA	A171T	40.4592	8.91983	8.84456	41.7764
2081	CCAATGGAGATCGTT	G51A,T84C,T327C,G370A,G431A,A485G,C530T,C551G,C640T,T672C	57.3137	0.473461	14.8019	27.4109

## Sheet: related to Fig 2d and Suppl 4b
Plasmid ID	Mutation	delta AE inclusion (%)	delta AE skipping (%)	delta full IR (%)	delta partial IR (%)	Mutation occurrence
1	G272A	22.8	-9.5	-17.9	4.6	20
2	G305A	20.2	-9.6	-13.4	2.8	13
3	C307G	-44.8	56.3	-3	-8.4	6
4	C339T	-40.2	41	5.1	-5.9	23
5	A356G	-44.5	62.2	-9.3	-8.4	24
6	A371G	-36.5	40.3	2.1	-5.9	10.6667
7	C415T	-33.6	34.6	3.8	-4.8	21
8	G460A	-29	33.2	0.3	-4.5	5
9	A483T	3.5	-4.1	-1.6	2.2	16
10	T333C	18.1	-8.5	-10.4	0.9	9
11	G229T	-17.5	5.9	13.2	-1.6	8
12	C397A	13.1	-7.4	-7.3	1.5	11
13	GT172G	4.2	-0.3	-3.9	0	1
14	G433T	-9.2	8.6	1.9	-1.3	3
15	G517T	5.1	12.1	-17.1	-0.1	2
16	T389G	-13.5	15.6	-1.3	-0.7	3
17	G531C	4.8	4.2	-8.4	-0.6	3
18	G380C	17.3	-7.8	-11.3	1.9	1
19	TG325T	0.4	-0.2	-0.1	0	1
20	G71C	0.9	3.2	-3	-1.1	1
21	CT612C	0.3	-1.3	1.4	-0.4	1
22	TA117T	3.4	0.8	-3.8	-0.5	4
23	T581G	-0.7	-1.6	2.3	0	2
24	C142A	2.7	5.8	-6.8	-1.7	6
25	G348C	24	-9.4	-16.1	1.5	2
26	A483C	-0.1	-5.1	2.6	2.6	2.3333

## Sheet: related to Fig. 5e
			ctrl				HNRNPH KD
Plasmid ID	Mutation	HNRNPH cluster	AE inclusion (%)	AE skipping (%)	Partial IR (%)	Full IR (%)	AE inclusion (%)	AE skipping (%)	Partial IR (%)	Full IR (%)
-	wt	-	35.3682	27.4411	5.5354	31.6553	52.3081	11.5135	6.88272	29.2957
20	G71C	cluster 1	42.1038	31.9336	5.46203	20.5006	59.4476	11.6261	7.10818	21.8181
27	G228A	cluster 2	29.8166	41.4951	3.85557	24.8328	44.3702	23.6862	6.17818	25.7655
2	G305A	cluster 3	63.5018	9.22584	9.51648	17.7559	62.1658	8.80083	9.00075	20.0327
28	G331C	cluster 3	73.0352	0.852467	10.8747	15.2375	72.1032	2.29384	10.3244	15.2786
25	G348C	cluster 3	81.478	0	9.5835	8.93846	79.8955	0	9.59025	10.5143
18	G380C	cluster 3	57.7869	14.9688	7.2669	19.9774	65.8504	5.7619	8.11609	20.2716
29	G471C	cluster 4	22.6857	54.0622	3.50831	19.7438	43.404	30.9876	6.21792	19.3905
30	G480T	cluster 4	23.9781	48.195	4.43989	23.387	41.0204	28.4049	7.95656	22.6182
31	G500A	cluster 4	34.1948	51.9385	3.21137	10.6553	55.2862	26.0655	5.19652	13.4517
32	G555C	cluster 5	35.8832	48.0598	3.69447	12.3625	55.955	25.0203	5.40168	13.6229
